# Supplementary material for: Clinical risk factors for pre-eclampsia determined in early pregnancy: systematic review and meta-analysis of large cohort studies
Source: PubMed Central journal article supplement — BMJ. 2016 Apr 19;353:i1753. doi: 10.1136/bmj.i1753 (PMC4837230; doi:10.1136/bmj.i1753), 2016-04-19

Supplemental file 3. Forest plots of the pooled relative risk for each risk factor for preeclampsia (named in red)

| Studies                                         | Estimate (95% C.I.)         | Ev/Trt         | Ev/Ctrl              |
|-------------------------------------------------|-----------------------------|----------------|----------------------|
| Liu S 2011                                      | 4.628 (1.738, 12.326)       | 4/1108         | 1477/1893590         |
| Sohlberg S 2012                                 | 1.772 (1.344, 2.337)        | 46/542         | 24076/502637         |
| <b>Overall (I<sup>2</sup>=7075 % , P=0.064)</b> | <b>2.541 (1.021, 6.320)</b> | <b>50/1650</b> | <b>25553/2396227</b> |

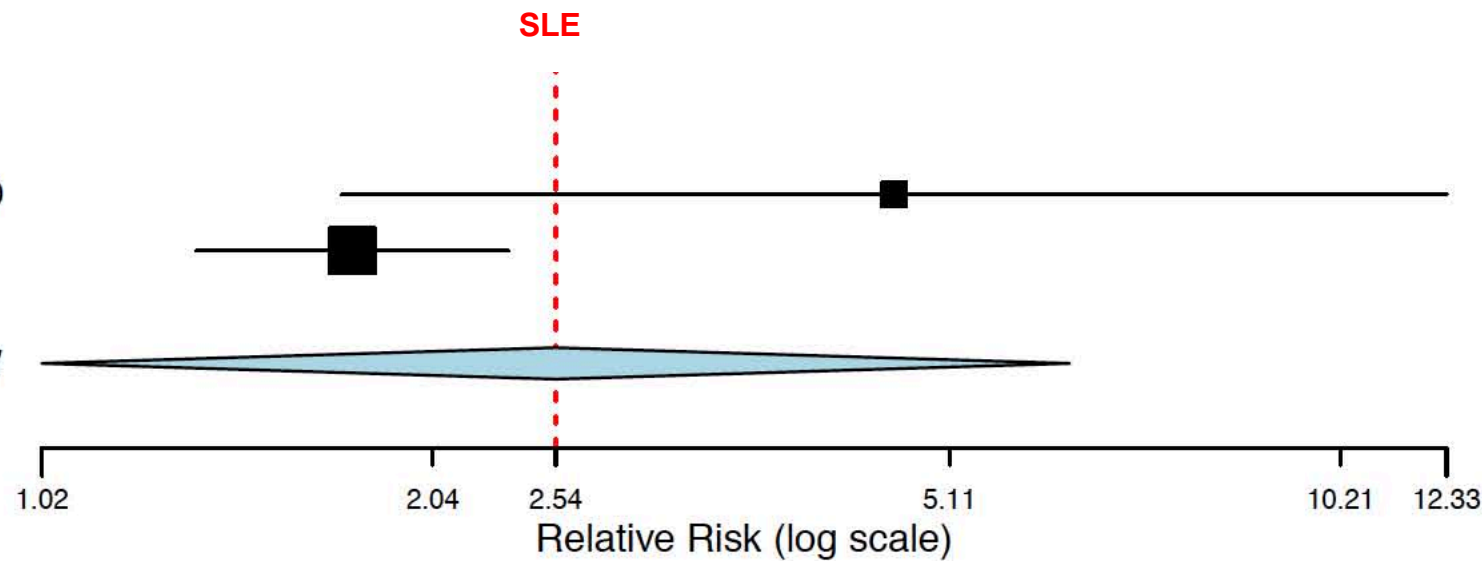

| Studies                                            | Estimate (95% C.I.)         | Ev/Trt               | Ev/Ctrl             |
|----------------------------------------------------|-----------------------------|----------------------|---------------------|
| Al-Mulhim AA 2003                                  | 3.209 (2.765, 3.723)        | 288/5124             | 397/22663           |
| Anderson NH 2012                                   | 1.874 (1.633, 2.151)        | 550/12860            | 307/13454           |
| Basso O 2004                                       | 3.013 (2.339, 3.881)        | 213/27583            | 83/32385            |
| Catov JM 2007                                      | 3.094 (2.777, 3.446)        | 1719/41325           | 398/29599           |
| Dayan N 2015                                       | 1.903 (1.598, 2.264)        | 318/4587             | 194/5324            |
| Di Lorenzo G 2012                                  | 1.867 (0.783, 4.452)        | 18/1227              | 7/891               |
| Eras JL 2000                                       | 3.973 (2.017, 7.824)        | 33/1061              | 11/1405             |
| Fortner RT 2009                                    | 4.361 (1.958, 9.714)        | 22/466               | 8/739               |
| Gaio DS 2001                                       | 3.253 (2.154, 4.913)        | 57/1353              | 36/2780             |
| Lee CJ 2000                                        | 1.450 (1.194, 1.761)        | 245/14821            | 170/14914           |
| Liu S 2011                                         | 2.504 (2.226, 2.816)        | 841/665077           | 416/823661          |
| Magnussen EB 2007                                  | 2.387 (1.687, 3.379)        | 85/1488              | 48/2006             |
| Martin CL 2000                                     | 1.702 (1.319, 2.196)        | 111/619              | 94/892              |
| Ngowa JDK 2013                                     | 0.882 (0.375, 2.077)        | 7/682                | 20/1719             |
| Oken E 2007                                        | 2.777 (1.576, 4.891)        | 43/845               | 16/873              |
| Papageorghiou AT 2005                              | 1.446 (1.182, 1.770)        | 184/6848             | 185/9958            |
| Pare E 2014                                        | 1.166 (0.914, 1.486)        | 113/1157             | 124/1480            |
| Plasencia W a 2007                                 | 1.974 (1.336, 2.917)        | 68/2821              | 39/3194             |
| Plasencia W b 2008                                 | 1.526 (1.014, 2.298)        | 56/1547              | 37/1560             |
| Poon LCY 2010                                      | 1.642 (1.171, 2.302)        | 66/2674              | 66/4391             |
| Rode L 2005                                        | 2.255 (1.602, 3.174)        | 153/5044             | 41/3048             |
| Schneider S 2011                                   | 2.047 (1.979, 2.117)        | 9989/321563          | 4945/325822         |
| Suzuki S 2009                                      | 1.585 (1.227, 2.047)        | 146/5861             | 95/6043             |
| Wright D 2012                                      | 1.634 (1.471, 1.816)        | 877/29108            | 549/29776           |
| Xiong X 2000                                       | 3.496 (2.964, 4.125)        | 451/21494            | 201/33493           |
| <b>Overall (I<sup>2</sup>=8997% , P&lt; 0.001)</b> | <b>2.100 (1.871, 2.358)</b> | <b>16653/1177235</b> | <b>8487/1372070</b> |

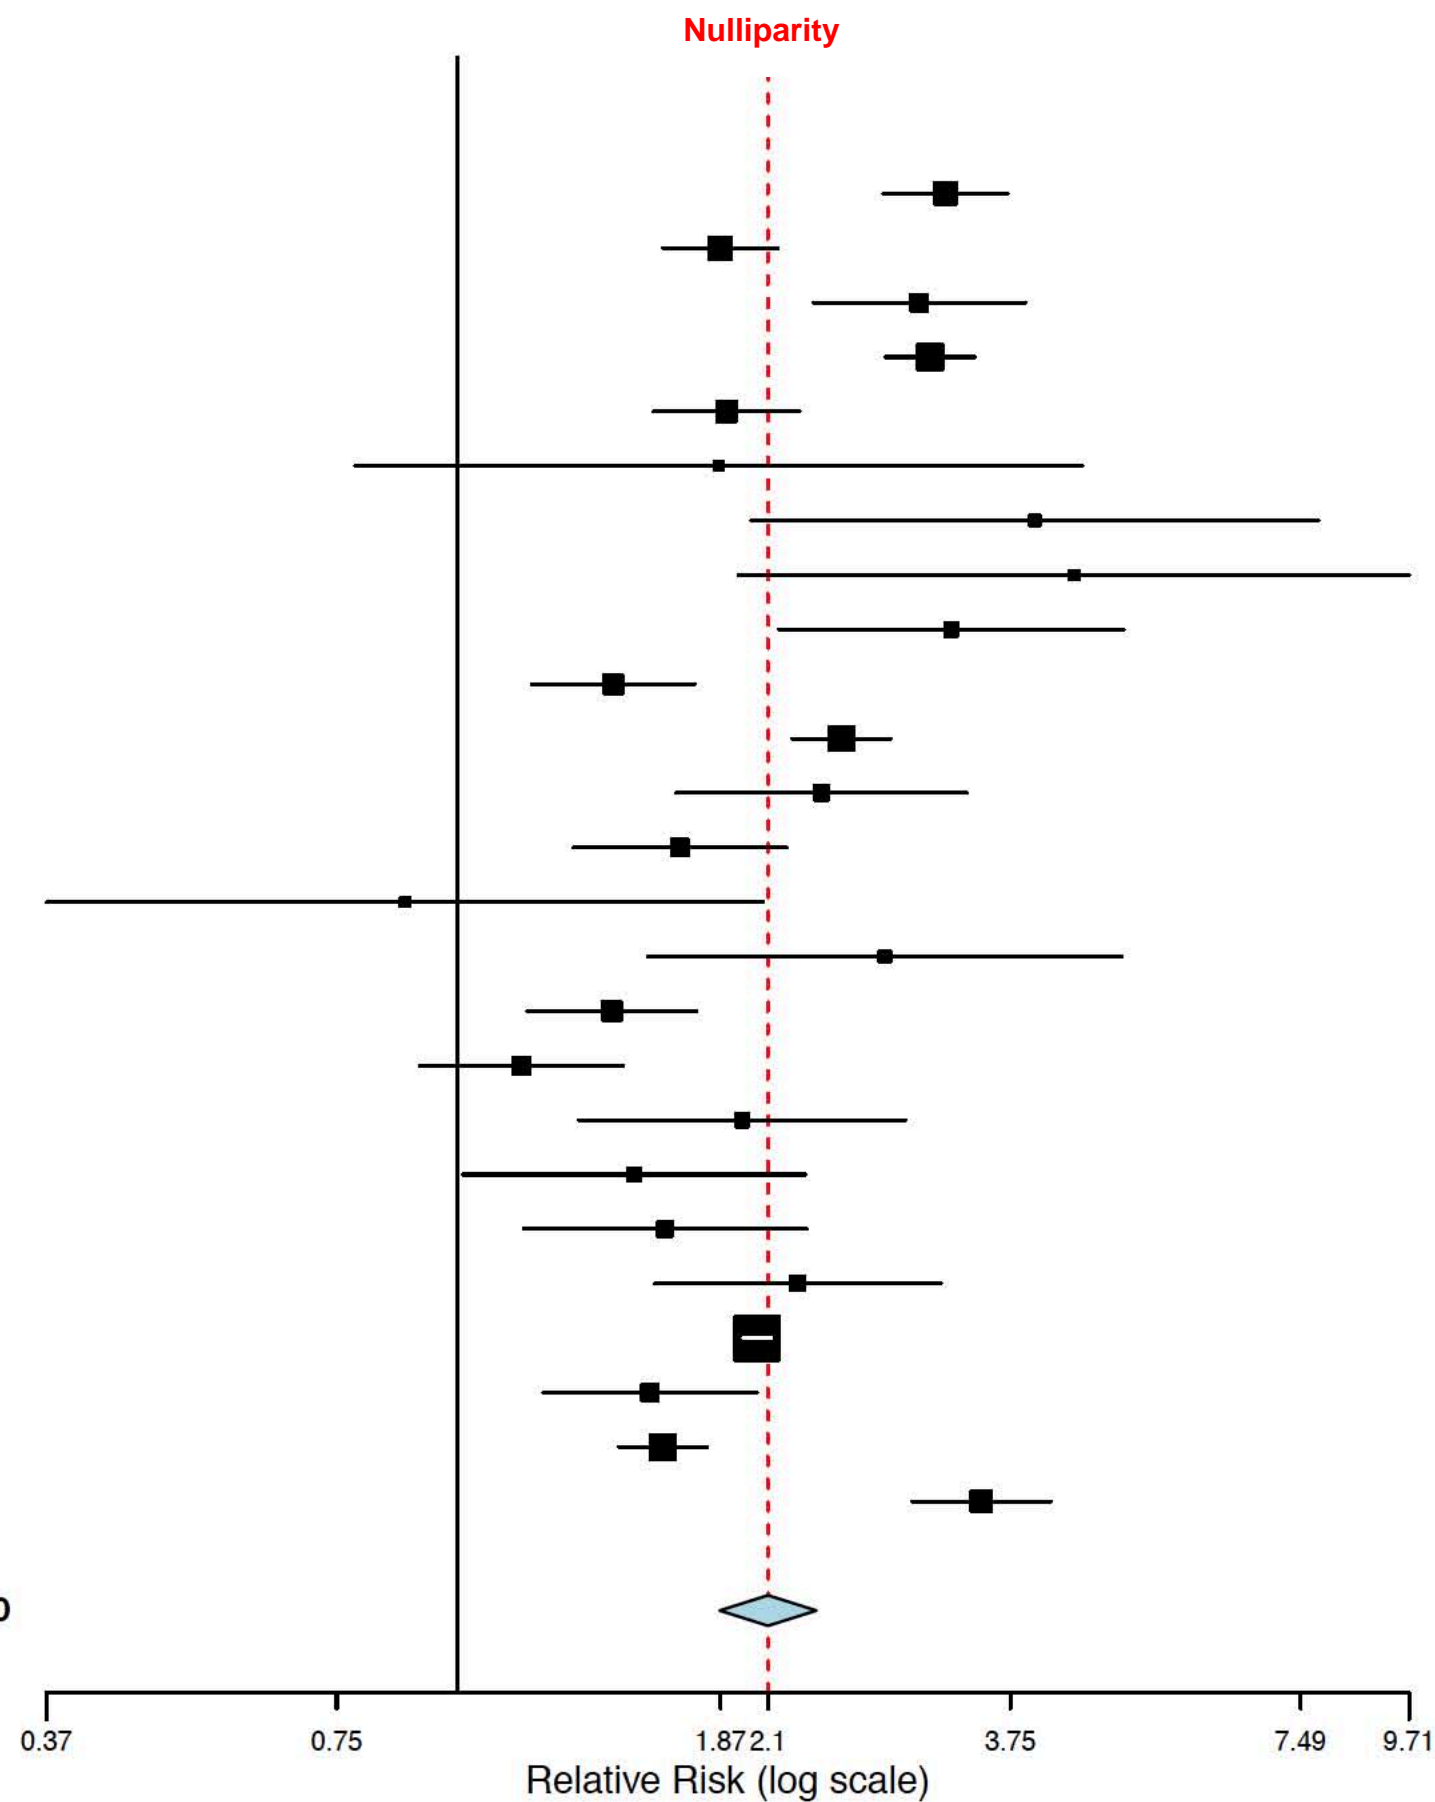

| Studies                                            | Estimate (95% C.I.)         | Ev/Trt              | Ev/Ctrl              |
|----------------------------------------------------|-----------------------------|---------------------|----------------------|
| Al-Mulhim AA 2003 2003                             | 1.561 (1.333, 1.829)        | 219/6429            | 466/21358            |
| Ananth CV 2007 2007                                | 0.920 (0.815, 1.039)        | 259/6631            | 6289/148174          |
| Anderson NH 2012 2012                              | 0.940 (0.814, 1.085)        | 255/8158            | 602/18096            |
| Basso O 2004 2004                                  | 0.785 (0.518, 1.190)        | 24/6060             | 272/53908            |
| Blomberg M 2014                                    | 1.234 (1.178, 1.292)        | 1975/73797          | 15721/724877         |
| Catov JM 2007                                      | 0.993 (0.843, 1.169)        | 150/5059            | 1967/65865           |
| Eras JL 2000                                       | 0.507 (0.215, 1.192)        | 6/586               | 38/1880              |
| Erez O 2006                                        | 1.263 (0.956, 1.669)        | 58/522              | 185/2103             |
| Gaijard R 2011a 2011                               | 0.721 (0.449, 1.157)        | 19/1282             | 151/7341             |
| Gaio DS 2001                                       | 2.051 (1.280, 3.285)        | 21/517              | 81/4090              |
| Goetzinger KR 2010                                 | 0.811 (0.648, 1.016)        | 178/2438            | 115/1278             |
| Khalil A 2013                                      | 1.165 (1.051, 1.291)        | 507/20386           | 1191/55772           |
| Lee CJ 2000                                        | 1.918 (1.526, 2.412)        | 92/3844             | 323/25891            |
| Liu S 2011                                         | 1.045 (0.919, 1.187)        | 290/349502          | 1240/1561227         |
| Ostlund I 2004                                     | 1.099 (1.043, 1.157)        | 1612/53293          | 10396/377559         |
| Pare E 2014                                        | 1.239 (0.959, 1.602)        | 79/758              | 158/1879             |
| Rasmussen S 2000                                   | 1.990 (1.830, 2.164)        | 591/19096           | 5463/351278          |
| Salem Yaniv S 2011                                 | 1.570 (1.343, 1.834)        | 146/1224            | 3329/43809           |
| Schneider S 2011                                   | 1.155 (1.114, 1.198)        | 3876/150676         | 11058/496710         |
| Sohlberg S 2012                                    | 1.269 (1.219, 1.320)        | 2532/42549          | 21605/460630         |
| Suzuki S 2009                                      | 1.485 (1.141, 1.934)        | 81/3026             | 160/8878             |
| Xiong X 2000                                       | 0.967 (0.742, 1.259)        | 60/5420             | 574/50119            |
| <b>Overall (I<sup>2</sup>=9237% , P&lt; 0.001)</b> | <b>1.197 (1.103, 1.300)</b> | <b>13030/761253</b> | <b>81384/4482722</b> |

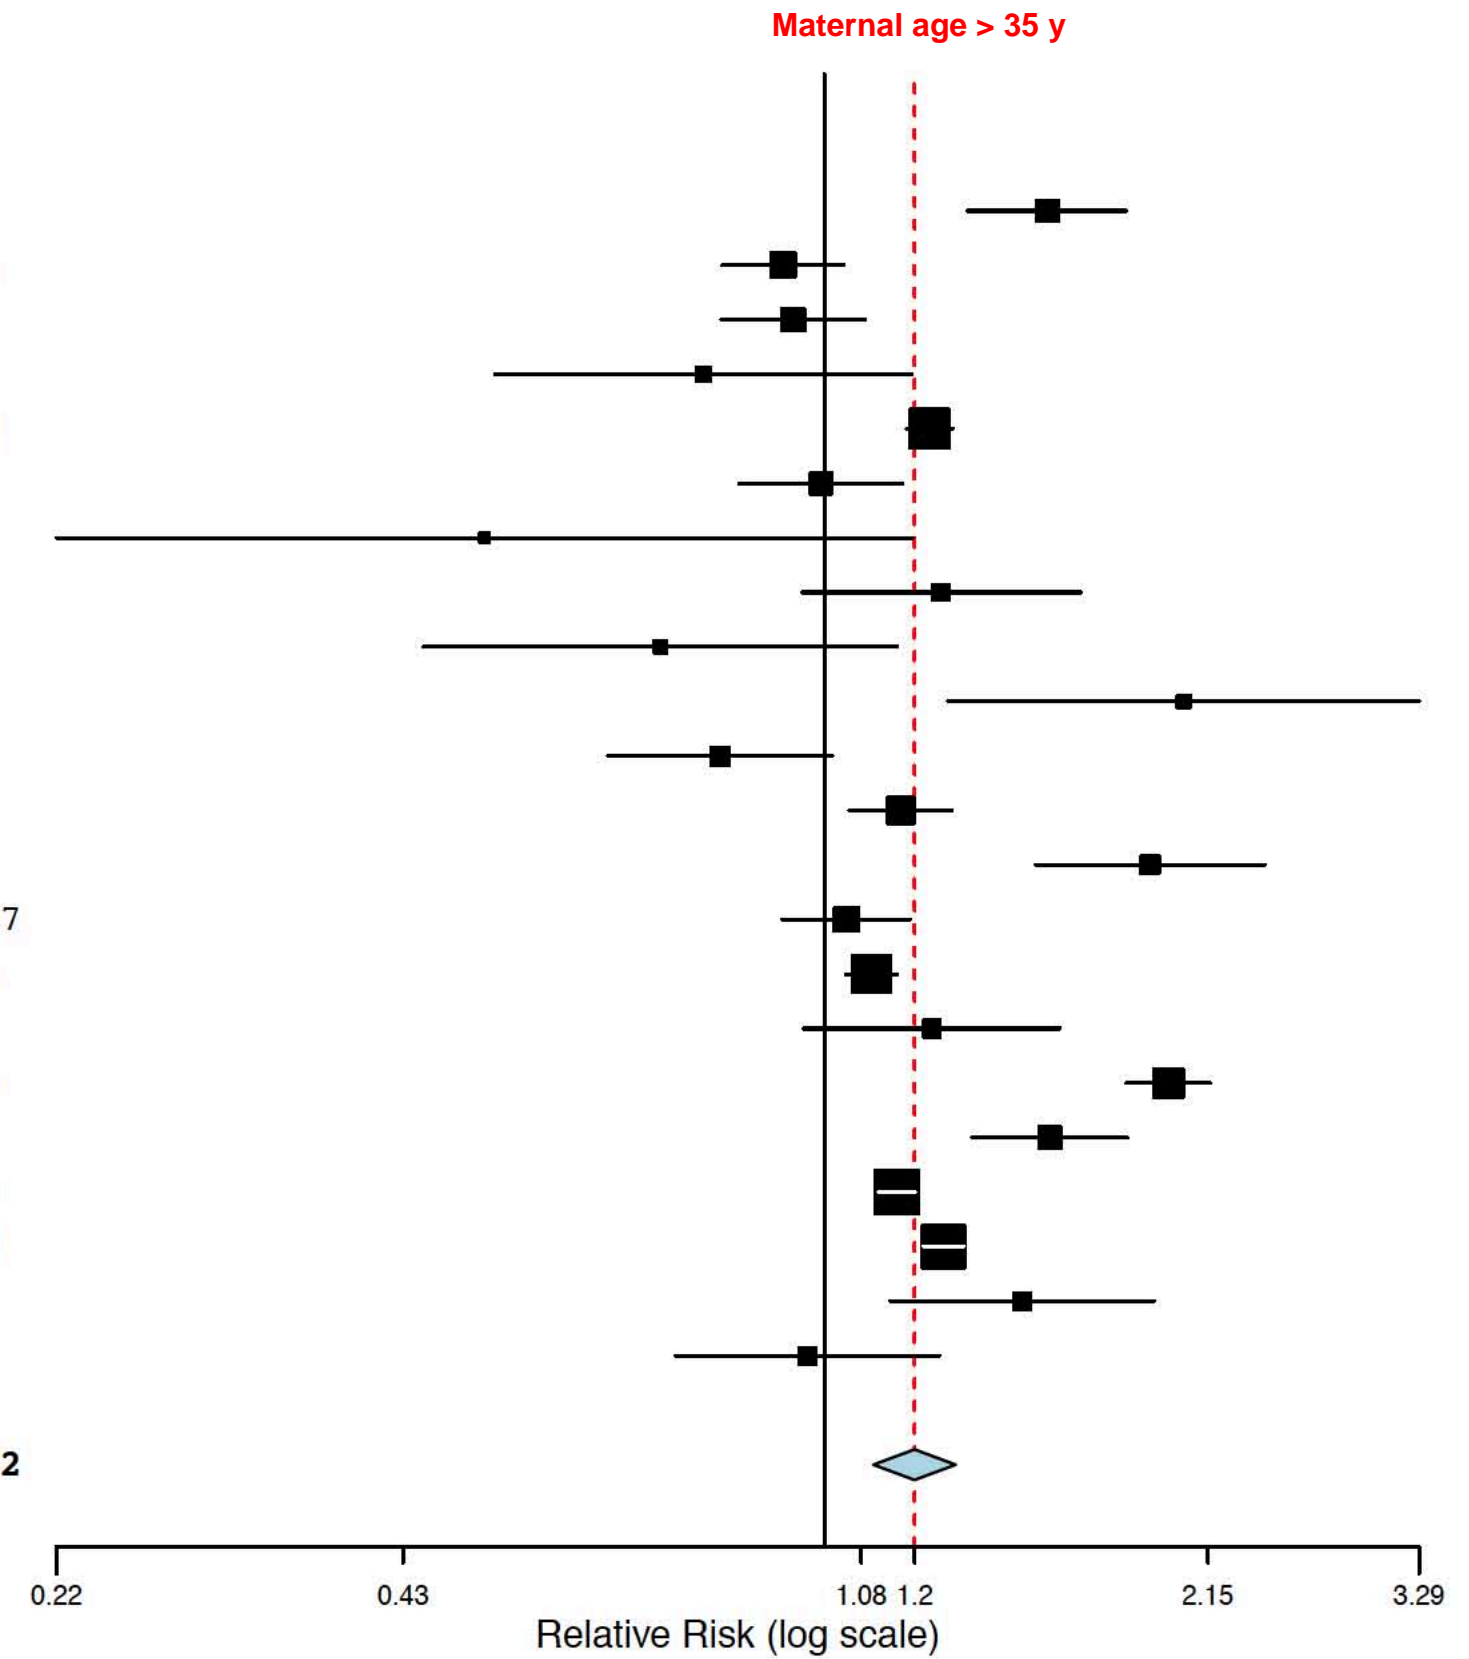

| Studies                                             | Estimate (95% C.I.)         | Ev/Trt             | Ev/Ctrl              |
|-----------------------------------------------------|-----------------------------|--------------------|----------------------|
| Al-Mulhim AA 2003                                   | 3.119 (2.570, 3.785)        | 116/1705           | 569/26082            |
| Anderson NH 2012                                    | 1.341 (1.049, 1.714)        | 66/1538            | 791/24716            |
| Blomberg M 2014                                     | 1.561 (1.410, 1.728)        | 365/10634          | 17331/788040         |
| Eras JL 2000                                        | 0.676 (0.094, 4.850)        | 1/82               | 43/2384              |
| Gaijallard R 2011a 2011                             | 1.050 (0.339, 3.251)        | 3/145              | 167/8478             |
| Goetzinger KR 2010                                  | 1.014 (0.719, 1.429)        | 34/426             | 259/3290             |
| Jacobsson B 2004                                    | 0.809 (0.754, 0.868)        | 775/32867          | 25547/876361         |
| Khalil A 2013                                       | 1.472 (1.234, 1.755)        | 130/4061           | 1568/72097           |
| Liu S 2011                                          | 1.446 (1.132, 1.847)        | 67/58650           | 1463/1852079         |
| Ngowa JDK 2013                                      | 2.883 (1.363, 6.097)        | 13/585             | 14/1816              |
| Oken E 2007                                         | 1.738 (0.648, 4.659)        | 4/69               | 55/1649              |
| Ostlund I 2004                                      | 1.436 (1.290, 1.599)        | 329/8289           | 11678/422563         |
| Pare E 2014                                         | 1.536 (1.011, 2.333)        | 21/157             | 216/2480             |
| Poon LCY 2010                                       | 0.935 (0.481, 1.820)        | 9/486              | 156/7880             |
| Salem Yaniv S 2011                                  | 2.007 (1.434, 2.809)        | 29/188             | 3447/44845           |
| Yogev Y 2010                                        | 2.919 (1.954, 4.360)        | 61/1947            | 38/3540              |
| <b>Overall (I<sup>2</sup>=9490 % , P&lt; 0.001)</b> | <b>1.536 (1.207, 1.954)</b> | <b>2023/121829</b> | <b>63342/4138300</b> |

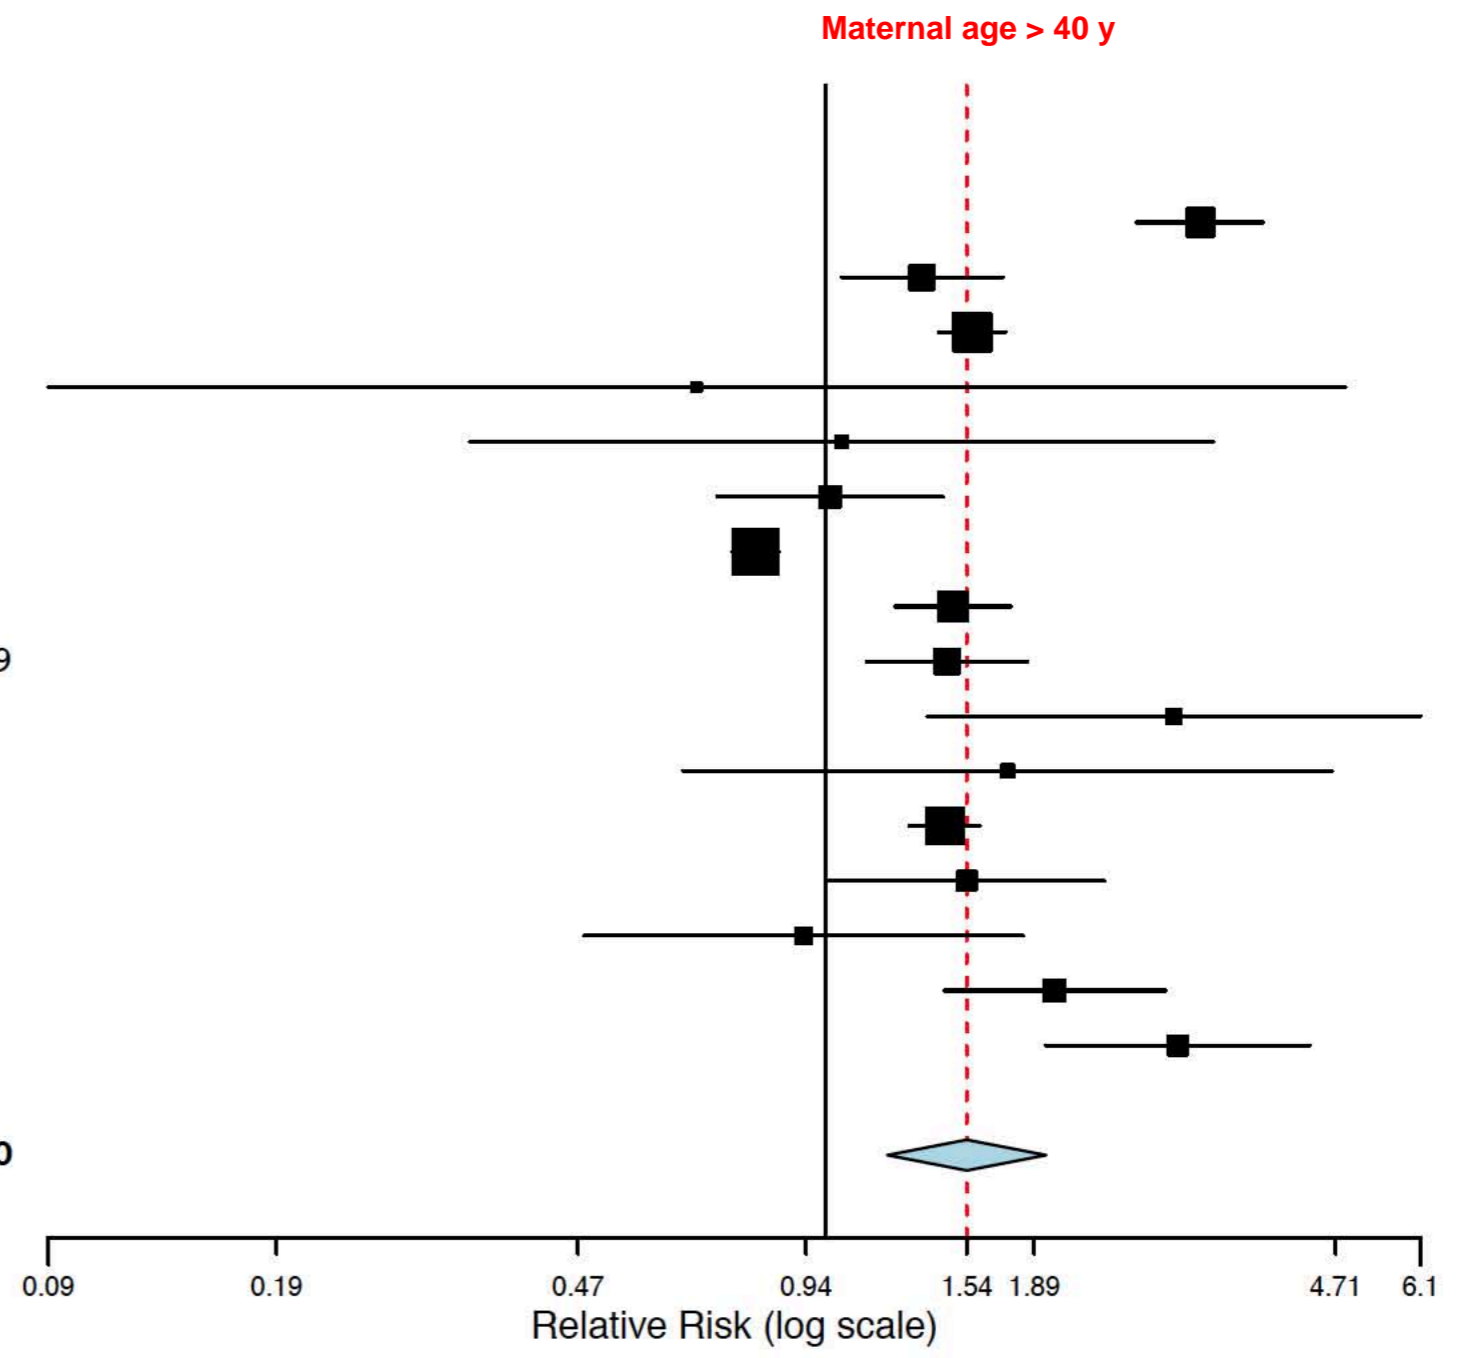

**Studies**

Estimate (95% C.I.) Ev/Trt Ev/Ctrl

Black M 2008 2.409 (1.564, 3.710) 20/364 769/33715

Lee CJ 2000 2.329 (1.256, 4.317) 10/312 405/29423

~~Overall (I<sup>2</sup>=0%, P=0.000) 2.300 (1.570, 3.030)~~

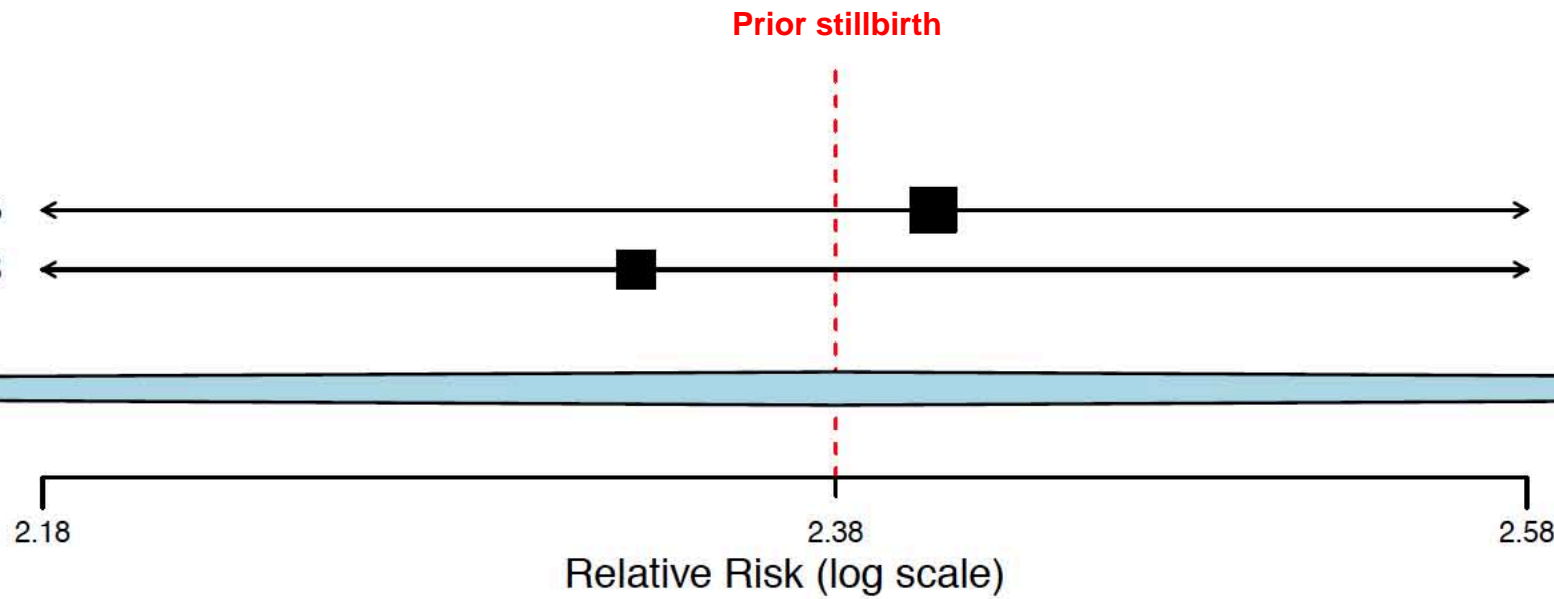

| Studies                                          | Estimate (95% C.I.)         | Ev/Trt          | Ev/Ctrl             |
|--------------------------------------------------|-----------------------------|-----------------|---------------------|
| Dayan N 2015                                     | 2.103 (1.164, 3.800)        | 10/93           | 502/9818            |
| Munkhaugen J 2009                                | 1.900 (1.343, 2.689)        | 38/1117         | 166/9273            |
| Ostlund I 2004                                   | 2.003 (1.706, 2.353)        | 142/2559        | 11864/428293        |
| Papageorghiou AT 2005                            | 0.468 (0.066, 3.298)        | 1/97            | 368/16709           |
| Sohlberg S 2012                                  | 1.565 (1.349, 1.815)        | 163/2179        | 23948/501000        |
| <b>Overall (I<sup>2</sup>=44.42 % , P=0.126)</b> | <b>1.792 (1.508, 2.130)</b> | <b>354/6045</b> | <b>36848/965093</b> |

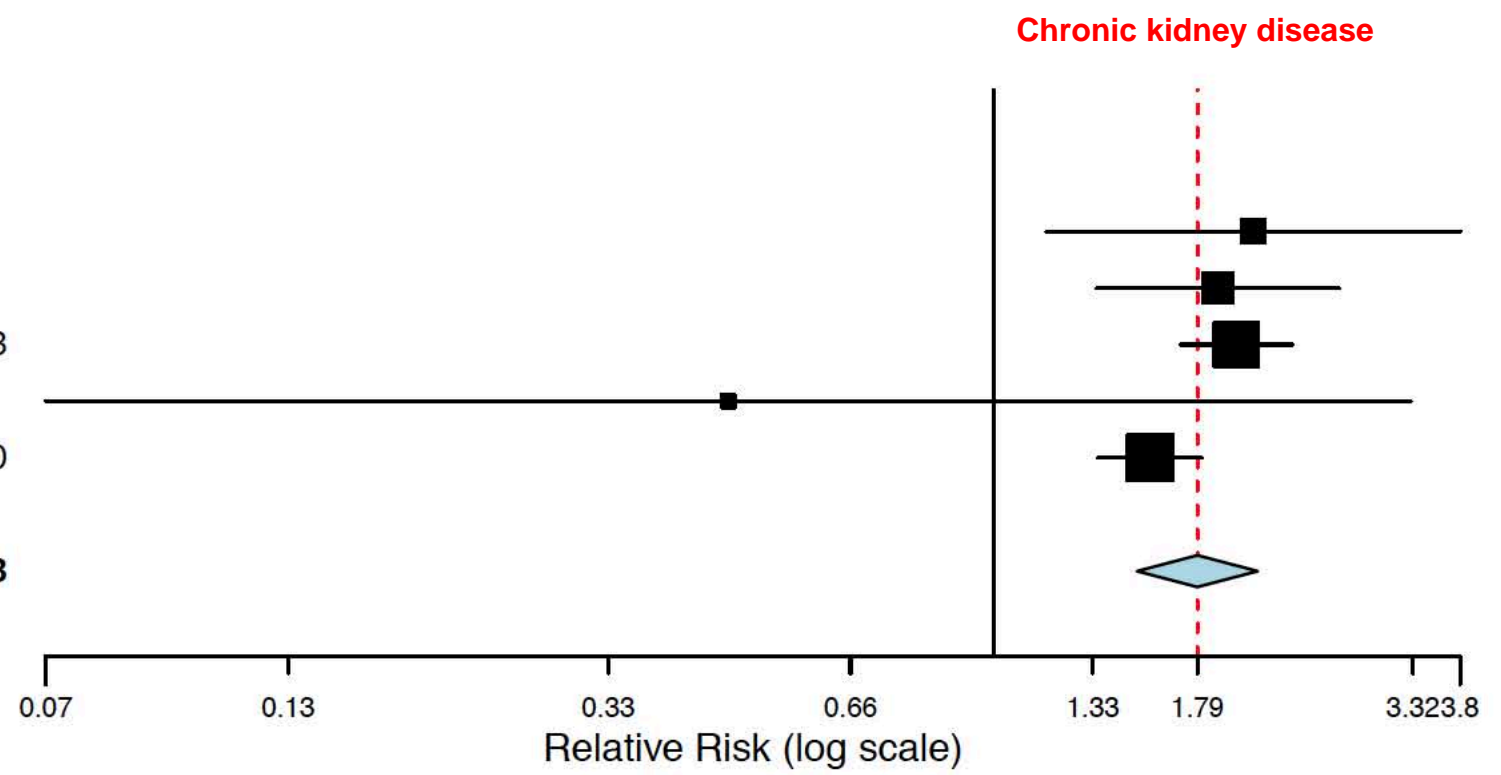

| Studies                                             | Estimate (95% C.I.)         | Ev/Trt            | Ev/Ctrl              |
|-----------------------------------------------------|-----------------------------|-------------------|----------------------|
| Carbone IF 2011                                     | 1.984 (1.284, 3.064)        | 20/426            | 628/26538            |
| Chen XK 2009                                        | 1.759 (1.103, 2.807)        | 25/622            | 53/2320              |
| Di Lorenzo G 2012                                   | 0.662 (0.041, 10.746)       | 0/60              | 25/2058              |
| Erez O 2006                                         | 2.114 (1.592, 2.807)        | 51/292            | 193/2336             |
| Jie Z 2015                                          | 1.916 (1.396, 2.629)        | 45/428            | 153/2788             |
| Johnston R 2015                                     | 2.822 (2.139, 3.724)        | 46/551            | 12019/406334         |
| Kuivasaari-Pirinen P 2012                           | 1.743 (1.081, 2.813)        | 16/255            | 967/26870            |
| Lee CJ 2000                                         | 2.763 (1.638, 4.662)        | 14/371            | 401/29364            |
| Luke B 2004                                         | 0.829 (0.648, 1.060)        | 70/352            | 174/725              |
| Pare E 2014                                         | 2.095 (1.577, 2.783)        | 52/312            | 185/2325             |
| Plasencia W a 2007                                  | 1.049 (0.336, 3.270)        | 3/161             | 104/5854             |
| Plasencia W b 2008                                  | 2.570 (1.257, 5.252)        | 8/142             | 65/2965              |
| Poon LCY 2010                                       | 1.667 (0.935, 2.972)        | 12/376            | 153/7990             |
| Shevell T 2005                                      | 1.548 (1.210, 1.980)        | 66/1776           | 823/34286            |
| Silberstein T 2014                                  | 2.015 (1.807, 2.248)        | 303/3268          | 7890/171513          |
| Sun LM 2009                                         | 1.100 (0.741, 1.633)        | 31/2118           | 112/8420             |
| Suzuki S 2009                                       | 3.732 (2.347, 5.934)        | 18/252            | 223/11652            |
| Tandberg A 2015                                     | 1.520 (1.411, 1.638)        | 666/12440         | 38629/1097089        |
| Thomson F 2005                                      | 1.786 (1.291, 2.471)        | 37/785            | 589/22320            |
| Wright D 2012                                       | 1.526 (1.221, 1.907)        | 79/2179           | 1347/56705           |
| <b>Overall (I<sup>2</sup>=7928 % , P&lt; 0.001)</b> | <b>1.794 (1.560, 2.063)</b> | <b>1562/27166</b> | <b>64733/1920452</b> |

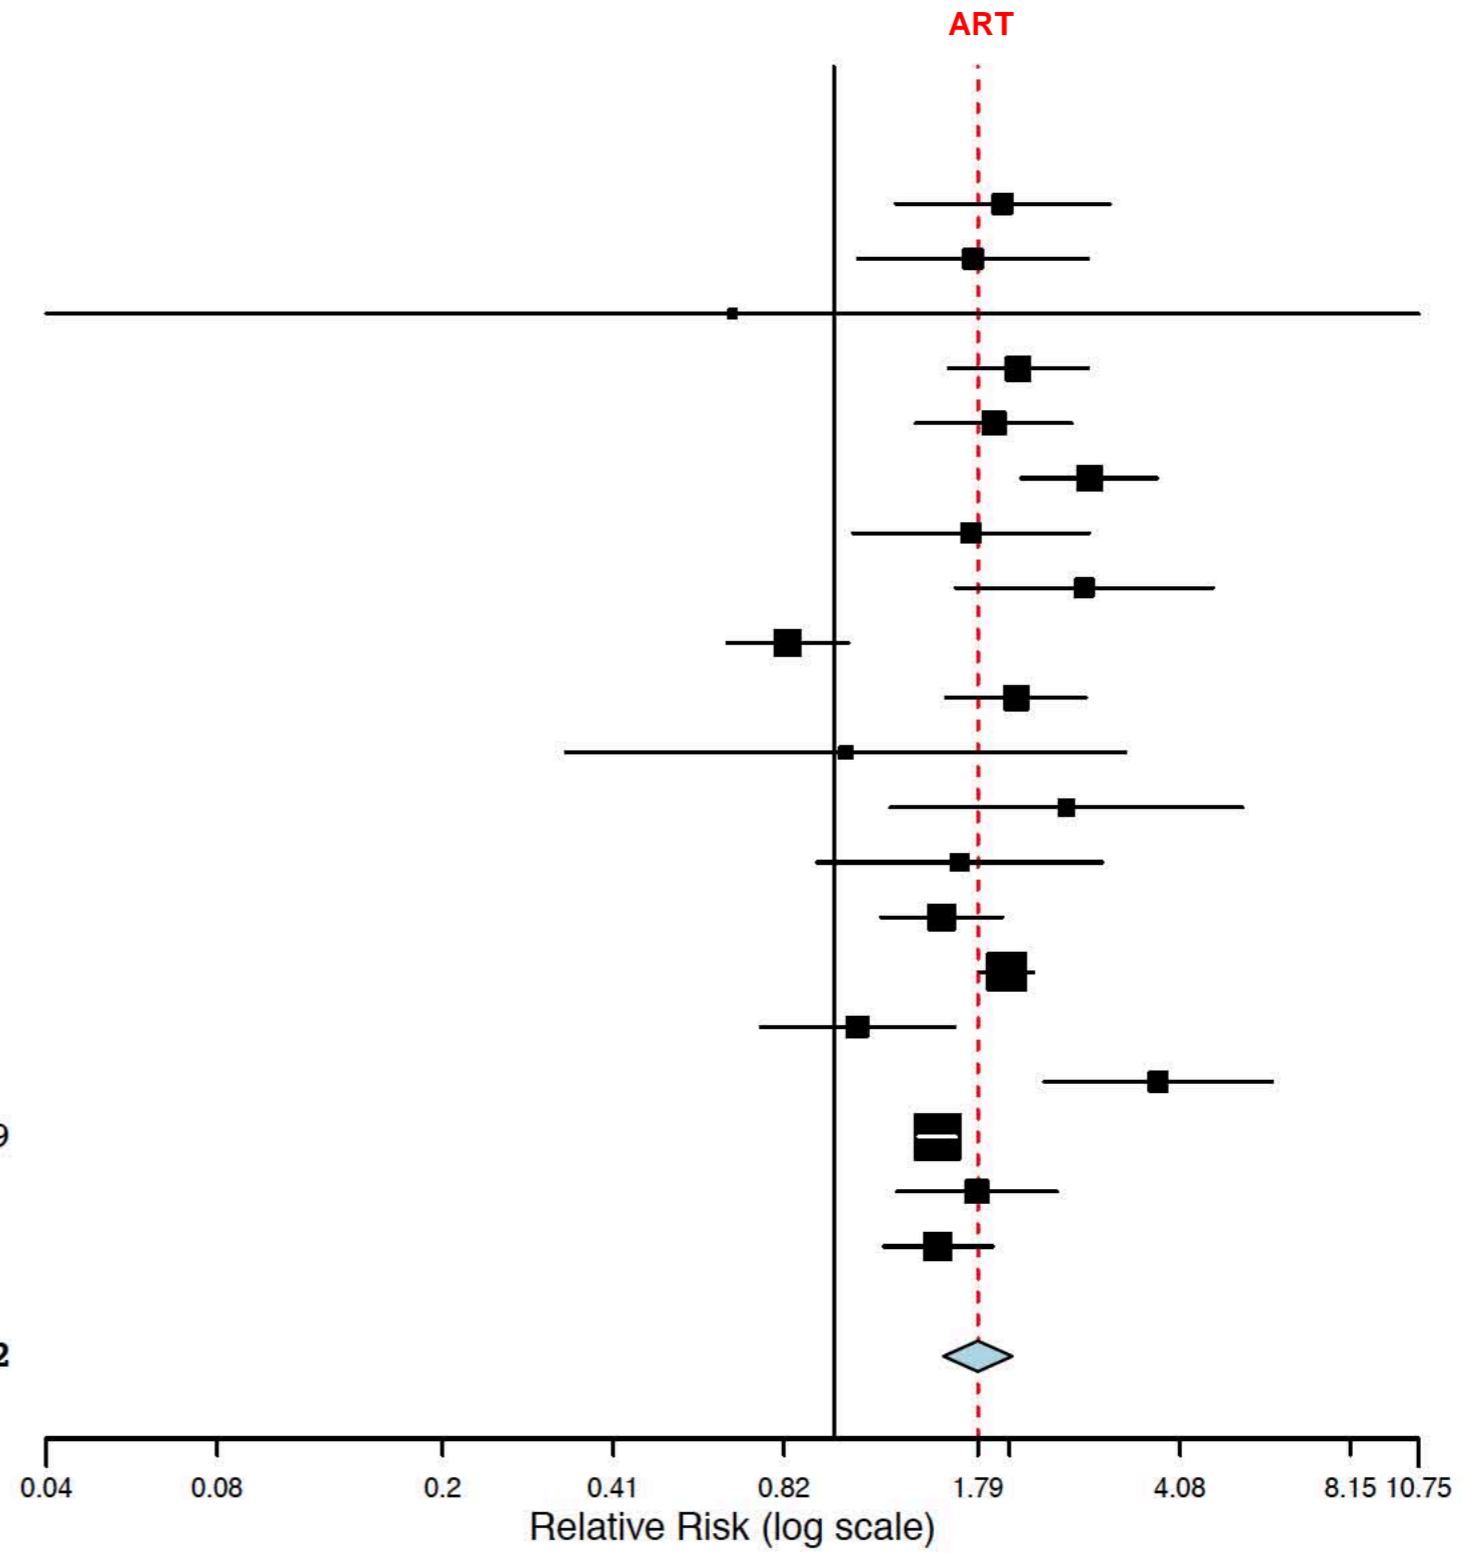

Pre-pregnancy BMI > 25 kg/m<sup>2</sup>

| Studies                                             | Estimate (95% C.I.)         | Ev/Trt               | Ev/Ctrl              |
|-----------------------------------------------------|-----------------------------|----------------------|----------------------|
| Ananth CV 2007                                      | 2.060 (1.962, 2.162)        | 3054/43604           | 3128/91987           |
| Anderson NH 2012                                    | 2.115 (1.840, 2.430)        | 549/11802            | 297/13501            |
| Baeten JM 2001                                      | 1.872 (1.782, 1.967)        | 2915/27279           | 2866/50212           |
| Basso O 2004 2004                                   | 1.579 (1.235, 2.019)        | 112/16022            | 146/32982            |
| Bautista–Castano 2013                               | 5.567 (2.294, 13.505)       | 26/2751              | 6/3534               |
| Berlac JF 2014                                      | 2.565 (1.500, 4.385)        | 46/826               | 18/829               |
| Bhattacharya S 2007                                 | 1.758 (1.566, 1.972)        | 523/7323             | 572/14076            |
| Boghossian NS 2014                                  | 1.930 (1.754, 2.124)        | 875/9695             | 708/15143            |
| Catov JM 2007                                       | 2.033 (1.867, 2.213)        | 926/19240            | 1147/48446           |
| Dayan N 2015                                        | 3.051 (2.562, 3.635)        | 324/3614             | 188/6399             |
| Dokras A 2006                                       | 1.945 (1.118, 3.383)        | 33/610               | 19/683               |
| El–Chaar D 2013                                     | 1.898 (1.484, 2.429)        | 154/2970             | 101/3698             |
| Eras JL 2000                                        | 1.812 (0.868, 3.779)        | 9/312                | 30/1884              |
| Fortner RT 2009                                     | 1.339 (0.652, 2.751)        | 16/433               | 13/471               |
| Frederick IO 2006                                   | 1.788 (1.080, 2.958)        | 24/402               | 36/1078              |
| Gaillard R 2011b 2011                               | 1.834 (1.283, 2.622)        | 56/1907              | 62/3873              |
| Goetzinger KR 2010                                  | 2.975 (2.287, 3.871)        | 186/1509             | 72/1738              |
| Hauger MS 2008                                      | 2.131 (1.874, 2.423)        | 423/12409            | 489/30563            |
| Kenny LC 2014                                       | 2.075 (1.626, 2.647)        | 172/2419             | 96/2801              |
| Lee CJ 2000                                         | 2.390 (1.853, 3.081)        | 74/2106              | 261/17750            |
| Liu X 2011                                          | 3.399 (2.639, 4.378)        | 132/1268             | 98/3200              |
| Magnussen EB 2007                                   | 1.613 (1.110, 2.343)        | 69/1394              | 43/1401              |
| Mahande MJ 2013                                     | 1.709 (0.653, 4.469)        | 21/499               | 5/203                |
| Ness RB 2008                                        | 1.455 (1.142, 1.853)        | 72/811               | 365/5981             |
| Ohkuchi A 2006                                      | 3.236 (1.657, 6.319)        | 13/206               | 22/1128              |
| Oken E 2007                                         | 3.078 (1.833, 5.169)        | 37/607               | 22/1111              |
| Ostlund I 2004                                      | 1.884 (1.816, 1.954)        | 5147/119316          | 5836/254835          |
| Ovesen P 2011                                       | 2.057 (1.993, 2.122)        | 7666/120411          | 7217/233160          |
| Pare E 2014                                         | 2.852 (2.175, 3.739)        | 169/1228             | 68/1409              |
| Park JH 2011                                        | 2.369 (1.504, 3.732)        | 34/517               | 37/1333              |
| Persson M 2012                                      | 1.957 (1.906, 2.009)        | 11638/284744         | 10094/483211         |
| Ramos GA 2005                                       | 1.778 (1.614, 1.959)        | 542/3811             | 1074/13427           |
| Rode L 2005                                         | 1.795 (1.337, 2.409)        | 64/1742              | 130/6350             |
| Saereeporncharenkul K 2011                          | 2.958 (2.013, 4.348)        | 44/642               | 56/2417              |
| Schneider S 2011                                    | 2.547 (2.458, 2.638)        | 7983/200353          | 4779/305438          |
| Sebire NJ 2001                                      | 1.573 (1.454, 1.702)        | 1214/110290          | 1238/176923          |
| Sohlberg S 2012                                     | 2.008 (1.954, 2.063)        | 9078/121556          | 10770/289515         |
| Suzuki S 2009                                       | 3.266 (2.459, 4.338)        | 61/1119              | 180/10785            |
| <b>Overall (I<sup>2</sup>=8917 % , P&lt; 0.001)</b> | <b>2.080 (1.978, 2.188)</b> | <b>54481/1137747</b> | <b>52289/2133475</b> |

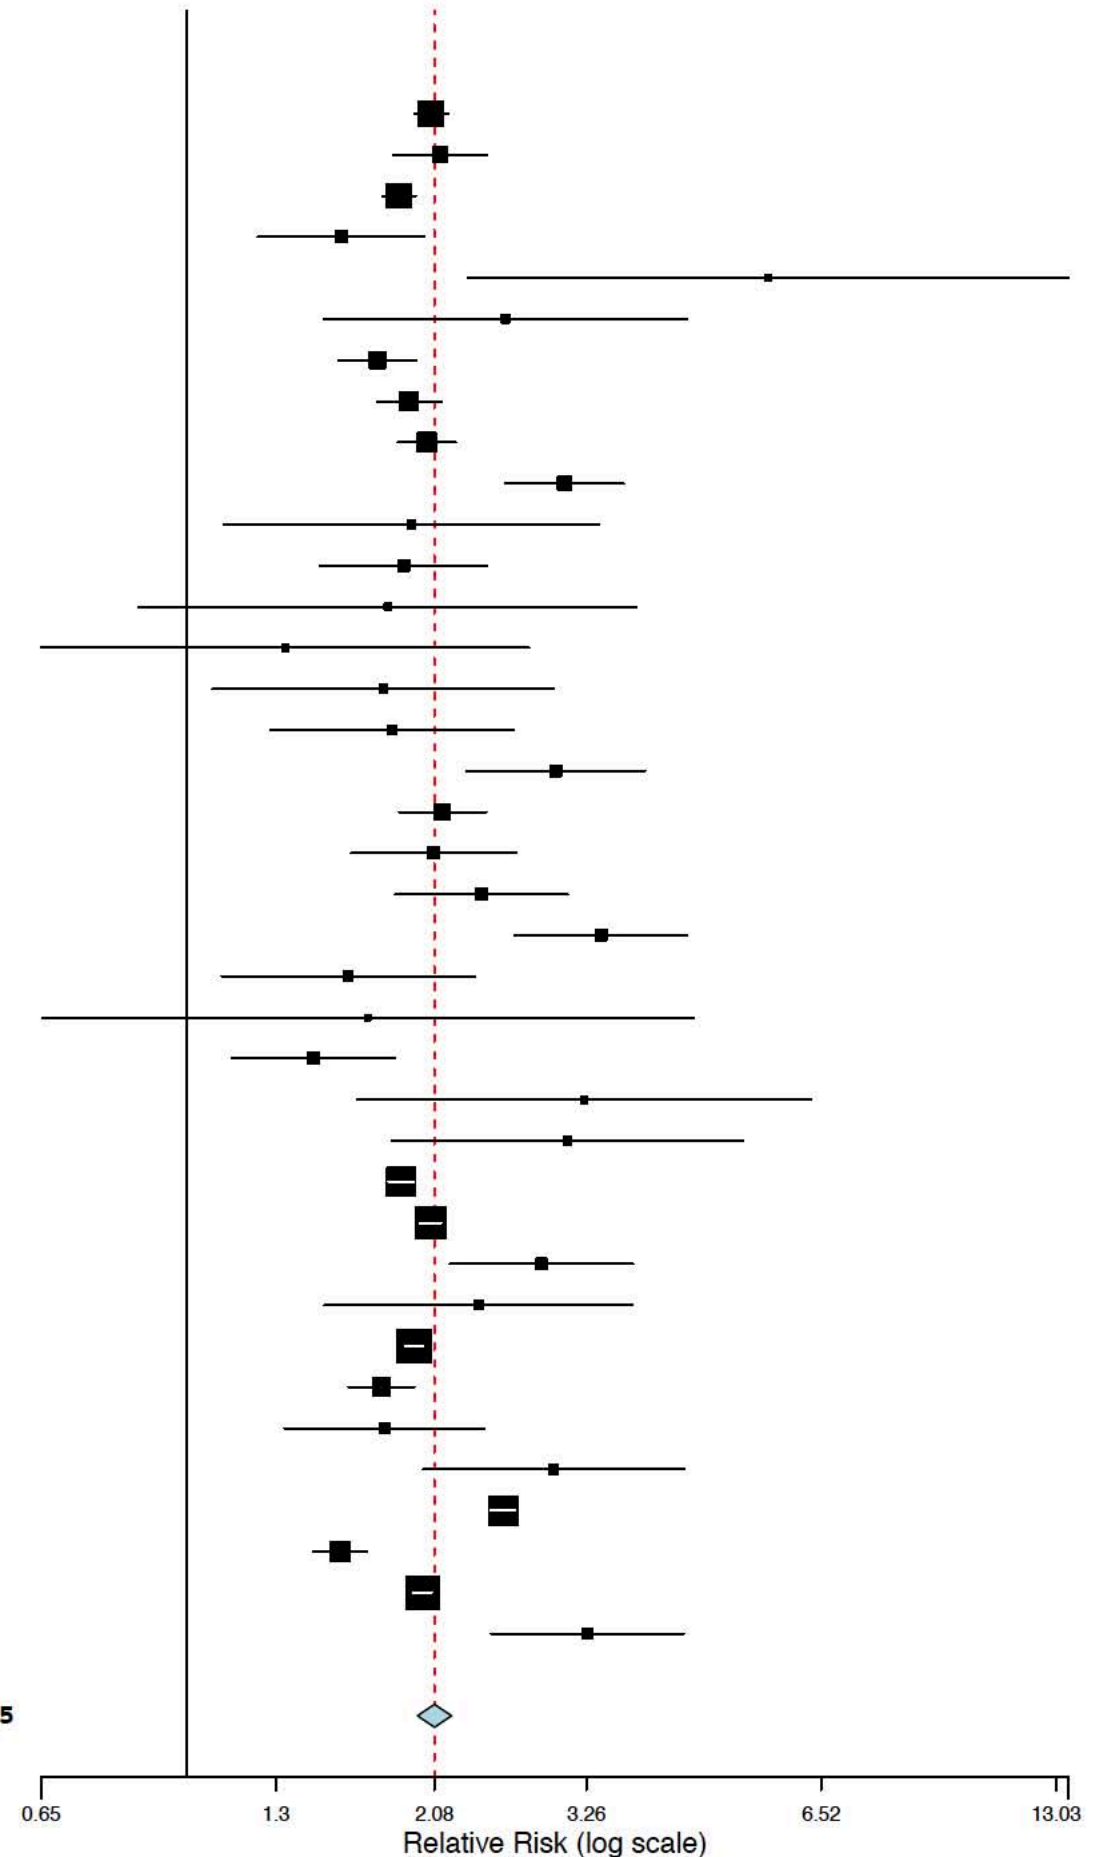



Pre-pregnancy BMI > 30 kg/m<sup>2</sup>

| Studies                                             | Estimate (95% C.I.)         | Ev/Trt              | Ev/Ctrl              |
|-----------------------------------------------------|-----------------------------|---------------------|----------------------|
| Ananth CV 2007                                      | 2.608 (2.459, 2.767)        | 1516/17092          | 3128/91987           |
| Anderson NH 2012                                    | 2.618 (2.229, 3.075)        | 274/4758            | 297/13501            |
| Baeten JM 2001                                      | 2.367 (2.226, 2.517)        | 1321/9778           | 2866/50212           |
| Basso O 2004                                        | 2.073 (1.477, 2.908)        | 43/4687             | 146/32982            |
| Bautista-Castano 2013                               | 8.972 (3.546, 22.701)       | 17/1116             | 6/3534               |
| Bhattacharya S 2007                                 | 2.565 (2.205, 2.983)        | 210/2015            | 572/14076            |
| Boghossian NS 2014                                  | 2.375 (2.118, 2.662)        | 432/3891            | 708/15143            |
| Catov JM 2007                                       | 3.011 (2.699, 3.360)        | 408/5723            | 1147/48446           |
| Cedergren MI 2004                                   | 2.140 (2.045, 2.239)        | 2457/84931          | 7111/526038          |
| Dokras A 2006                                       | 2.625 (1.451, 4.748)        | 23/315              | 19/683               |
| El-Chaar D 2013                                     | 2.295 (1.729, 3.048)        | 83/1324             | 101/3698             |
| Fortner RT 2009                                     | 1.900 (0.918, 3.935)        | 15/286              | 13/471               |
| Frederick IO 2006                                   | 3.348 (1.949, 5.751)        | 18/161              | 36/1078              |
| Gaillard R 2011b 2001                               | 2.231 (1.371, 3.631)        | 21/588              | 62/3873              |
| Goetzinger KR 2010                                  | 3.784 (2.846, 5.031)        | 108/689             | 72/1738              |
| Hauger MS 2008                                      | 3.262 (2.774, 3.835)        | 197/3864            | 489/31286            |
| Kenny LC 2014                                       | 2.696 (2.020, 3.599)        | 78/844              | 96/2801              |
| Kerrigan AM 2010                                    | 2.209 (1.689, 2.889)        | 78/1452             | 147/6044             |
| Liu X 2011                                          | 4.965 (3.615, 6.818)        | 52/342              | 98/3200              |
| Mahande MJ 2013                                     | 2.631 (0.965, 7.174)        | 14/216              | 5/203                |
| Mbah AK 2010                                        | 2.644 (2.593, 2.697)        | 15973/183042        | 22144/671043         |
| Ohkuchi A 2006                                      | 5.027 (1.984, 12.735)       | 5/51                | 22/1128              |
| Oken E 2007                                         | 4.552 (2.546, 8.138)        | 21/233              | 22/1111              |
| Ostlund I 2004                                      | 2.668 (2.535, 2.809)        | 1811/29637          | 5836/254835          |
| Ovesen P 2011                                       | 2.803 (2.698, 2.912)        | 3745/43161          | 7217/233160          |
| Pare E 2014                                         | 3.957 (2.972, 5.269)        | 110/576             | 68/1409              |
| Persson M 2012                                      | 2.842 (2.749, 2.938)        | 4924/82949          | 10094/483211         |
| Poon LCY 2010                                       | 3.006 (2.196, 4.115)        | 58/1278             | 107/7088             |
| Ramos GA 2005                                       | 2.003 (1.788, 2.243)        | 338/2110            | 1074/13427           |
| Rode L 2005                                         | 2.420 (1.556, 3.764)        | 22/444              | 130/6350             |
| Saareporncharenkul K 2011                           | 5.125 (3.124, 8.409)        | 19/160              | 56/2417              |
| Salihu HM 2011                                      | 2.434 (2.285, 2.593)        | 1588/26954          | 2179/90022           |
| Schneider S 2011                                    | 3.878 (3.725, 4.037)        | 4351/71709          | 4779/305438          |
| Sebire NJ 2001                                      | 2.042 (1.834, 2.274)        | 447/31276           | 1238/176923          |
| Sohlberg S 2012                                     | 2.839 (2.737, 2.945)        | 3454/32707          | 10770/289515         |
| Steinfeld JD 2000                                   | 1.767 (1.056, 2.957)        | 15/168              | 114/2256             |
| Suzuki S 2009                                       | 3.302 (1.584, 6.884)        | 7/127               | 180/10785            |
| Voigt M 2008a 2008                                  | 5.717 (5.501, 5.942)        | 4673/49925          | 5071/309736          |
| Wahabi HA 2014                                      | 2.942 (1.406, 6.158)        | 23/1185             | 10/1516              |
| Weiss JL 2004                                       | 2.005 (1.602, 2.508)        | 99/2350             | 289/13752            |
| <b>Overall (I<sup>2</sup>=9795 % , P&lt; 0.001)</b> | <b>2.818 (2.566, 3.094)</b> | <b>49048/704114</b> | <b>88519/3726116</b> |

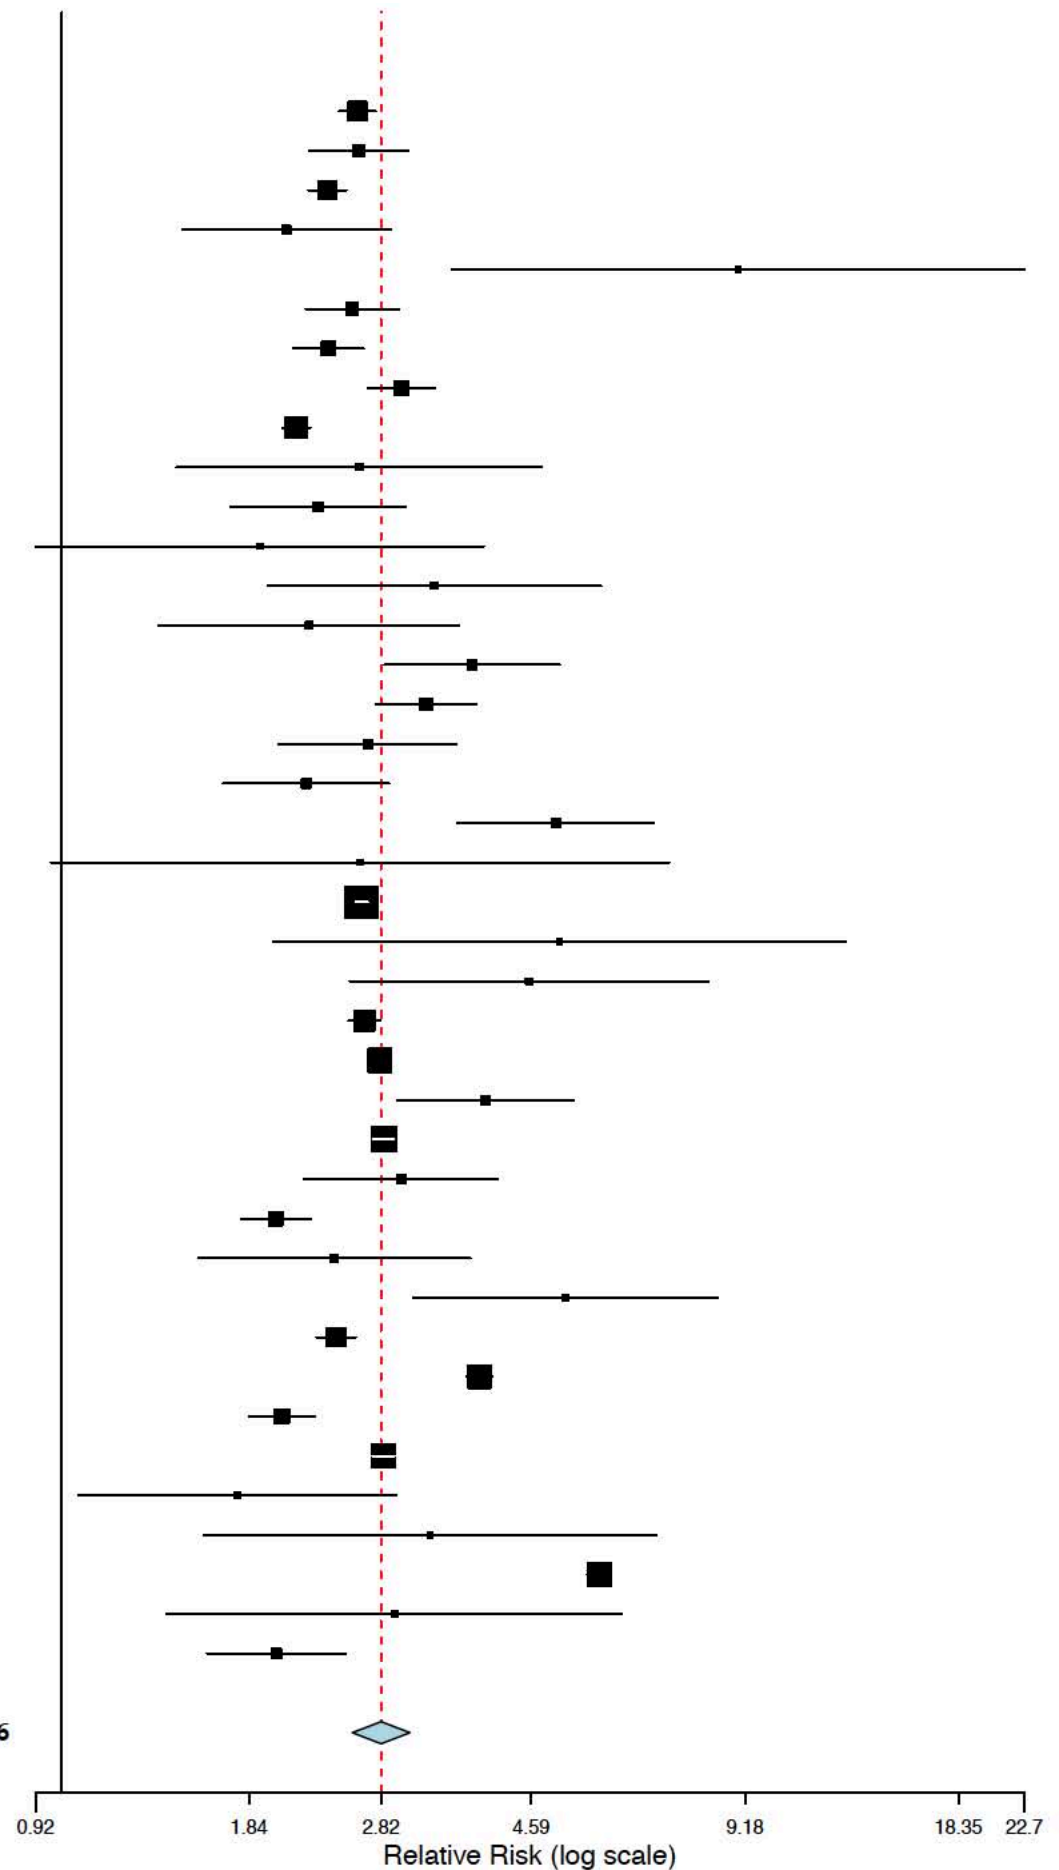

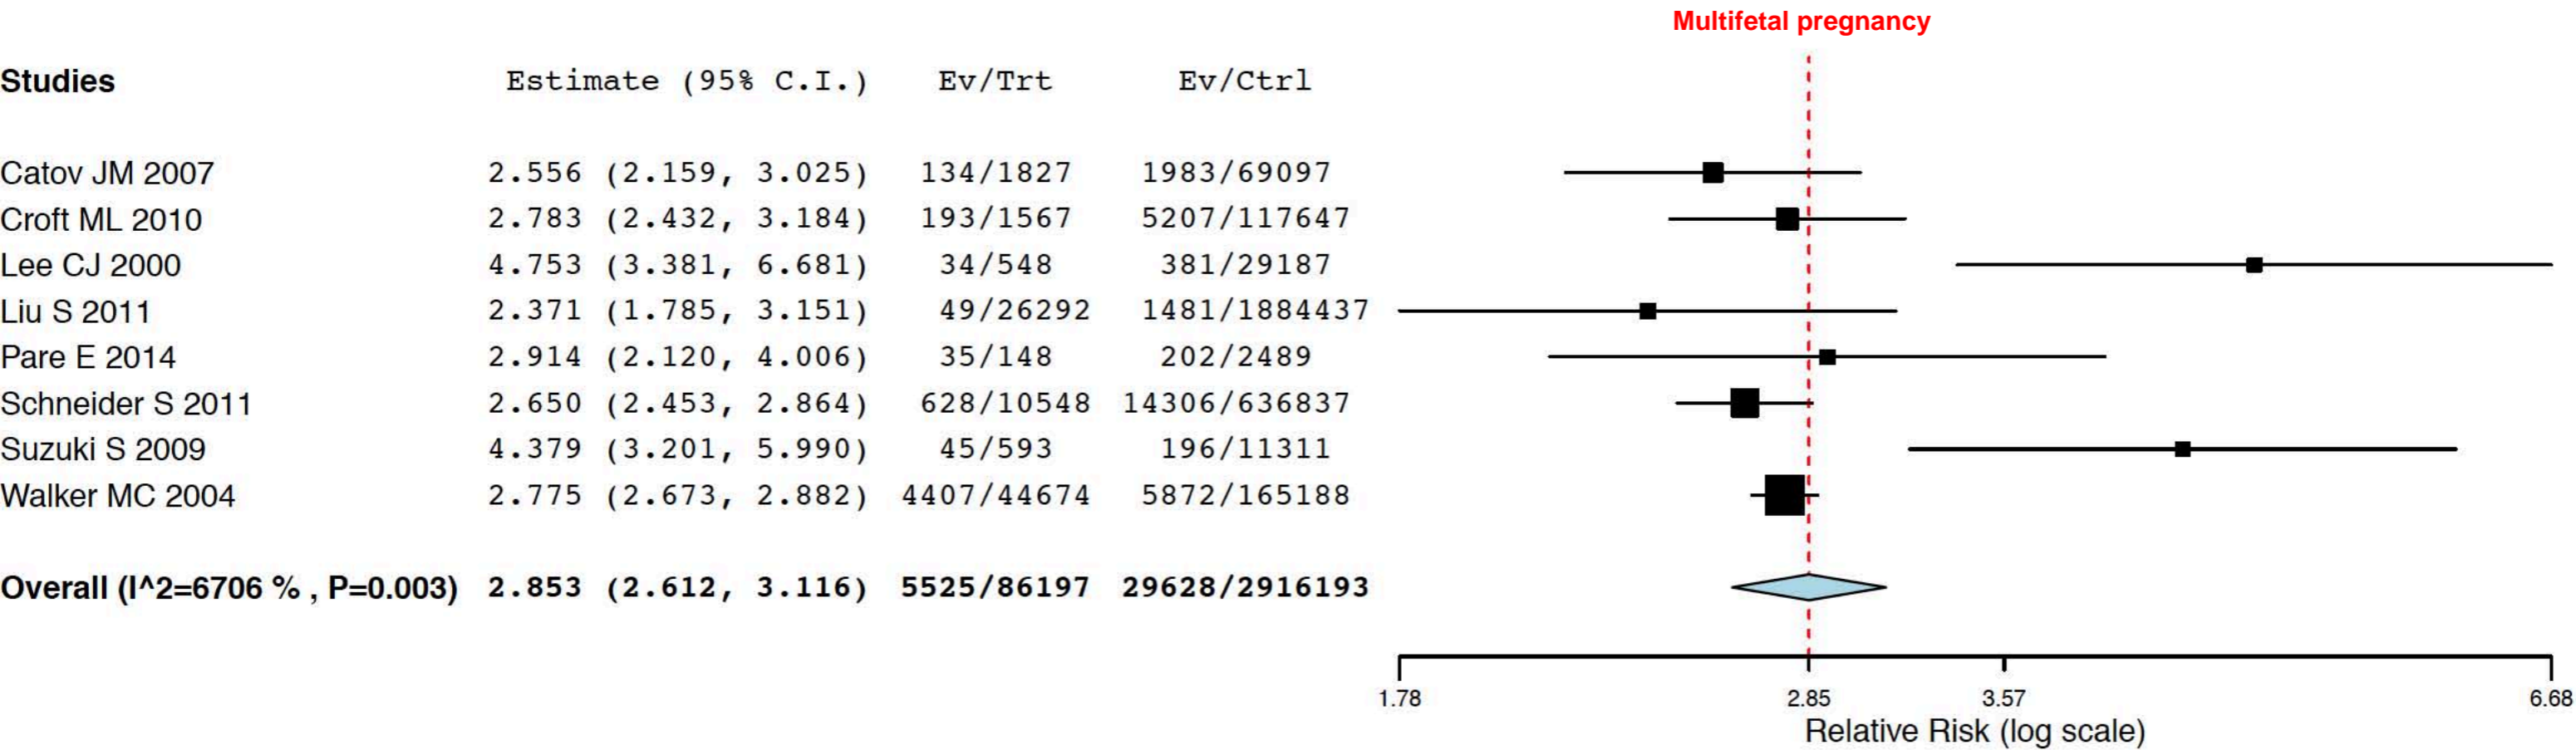

| Studies                                         | Estimate (95% C.I.)         | Ev/Trt          | Ev/Ctrl             |
|-------------------------------------------------|-----------------------------|-----------------|---------------------|
| Ananth CV 2007                                  | 1.828 (1.584, 2.110)        | 161/1076        | 12584/153734        |
| Papageorghiou AT 2005                           | 1.176 (0.534, 2.589)        | 6/138           | 363/9820            |
| Rasmussen S 2007                                | 2.578 (1.867, 3.559)        | 35/550          | 2937/118968         |
| <b>Overall (I<sup>2</sup>=6100 % , P=0.077)</b> | <b>1.959 (1.434, 2.675)</b> | <b>202/1764</b> | <b>15884/282522</b> |

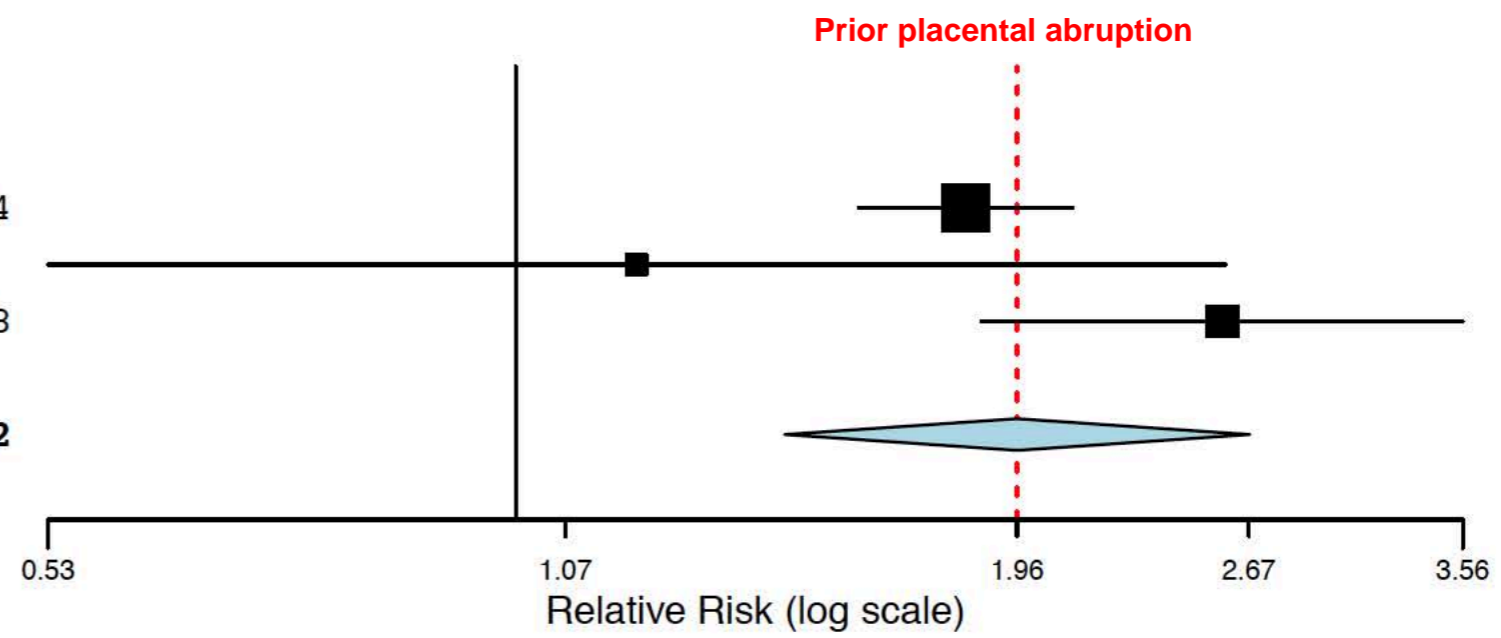

| Studies                                             | Estimate (95% C.I.)         | Ev/Trt            | Ev/Ctrl              |
|-----------------------------------------------------|-----------------------------|-------------------|----------------------|
| Anderson NH 2012                                    | 2.855 (1.995, 4.085)        | 29/349            | 542/18622            |
| Boghossian NS 2014                                  | 1.468 (0.904, 2.385)        | 15/167            | 1618/26446           |
| Catov JM 2007                                       | 3.717 (2.630, 5.254)        | 29/264            | 2088/70660           |
| Dayan N 2015                                        | 3.318 (2.410, 4.568)        | 34/208            | 478/9703             |
| Di Lorenzo G 2012                                   | 1.749 (0.110, 27.862)       | 0/22              | 25/2050              |
| Goetzinger KR 2010                                  | 4.071 (2.923, 5.670)        | 28/94             | 265/3622             |
| Lee CJ 2000                                         | 3.726 (1.233, 11.261)       | 3/58              | 412/29677            |
| Magnussen EB 2007                                   | 4.834 (1.365, 17.124)       | 2/11              | 131/3483             |
| Mahande MJ 2013                                     | 8.258 (2.530, 26.955)       | 2/7               | 135/3902             |
| Papageorghiou AT 2005                               | 1.259 (0.477, 3.327)        | 4/145             | 365/16661            |
| Pare E 2014                                         | 4.865 (3.460, 6.840)        | 23/57             | 214/2580             |
| Persson M 2012                                      | 5.432 (5.013, 5.886)        | 521/3457          | 21211/764498         |
| Plasencia W a 2007                                  | 1.022 (0.145, 7.194)        | 1/55              | 106/5960             |
| Plasencia W b 2008                                  | 1.034 (0.067, 15.937)       | 0/15              | 93/3092              |
| Poon LCY 2010                                       | 1.497 (0.379, 5.915)        | 2/68              | 163/8298             |
| Rasmussen S 2000                                    | 4.821 (3.812, 6.096)        | 65/832            | 5989/369542          |
| Sandvik MK 2010                                     | 3.942 (3.483, 4.462)        | 216/1481          | 23476/634499         |
| Sohlberg S 2012                                     | 3.997 (3.690, 4.330)        | 500/2667          | 23340/497651         |
| Wright D 2012                                       | 2.849 (1.985, 4.090)        | 28/411            | 1398/58473           |
| <b>Overall (I<sup>2</sup>=7863 % , P&lt; 0.001)</b> | <b>3.651 (3.139, 4.247)</b> | <b>1502/10368</b> | <b>82049/2529419</b> |

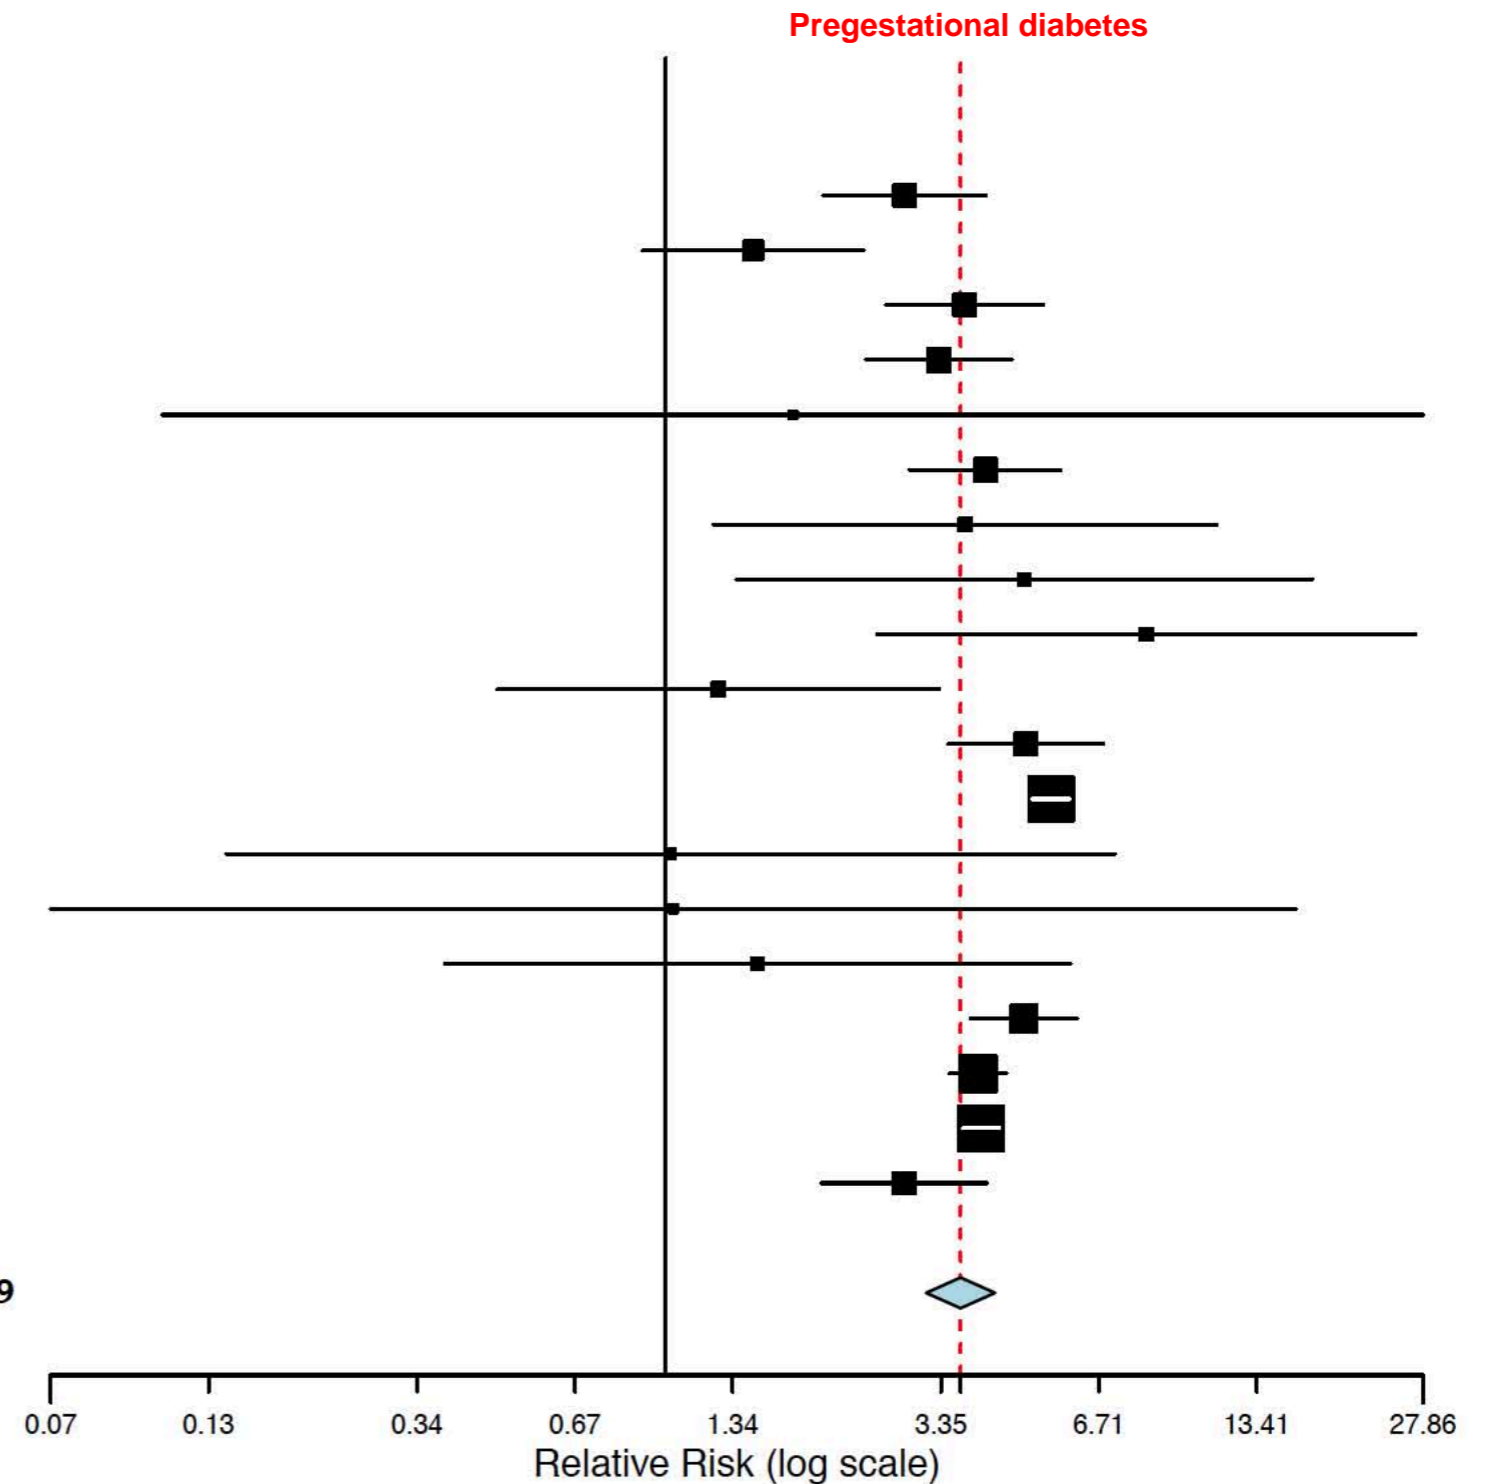

| Studies                                             | Estimate (95% C.I.) |                       | Ev/Trt            | Ev/Ctrl              |
|-----------------------------------------------------|---------------------|-----------------------|-------------------|----------------------|
| Ananth CV 2007                                      | 7.683               | (7.203, 8.194)        | 1080/6548         | 3183/148262          |
| Boghossian NS 2014                                  | 8.908               | (7.430, 10.681)       | 155/1292          | 341/25321            |
| Boyd HA 2013                                        | 12.691              | (11.352, 14.188)      | 337/4824          | 2088/379314          |
| Brown MA 2007                                       | 23.475              | (5.768, 95.547)       | 54/383            | 2/333                |
| Catov JM 2007                                       | 15.885              | (13.075, 19.299)      | 144/1020          | 254/28579            |
| Hernandez-Diaz S 2009                               | 12.874              | (12.335, 13.436)      | 2871/19540        | 5538/485249          |
| Lee CJ 2000                                         | 7.064               | (4.454, 11.203)       | 19/261            | 151/14653            |
| Li DK 2000                                          | 12.527              | (10.987, 14.283)      | 260/2833          | 1006/137314          |
| Magnussen EB 2007                                   | 3.544               | (2.137, 5.876)        | 15/121            | 118/3373             |
| Mahande MJ 2013                                     | 10.330              | (7.466, 14.292)       | 42/171            | 103/4332             |
| Melamed N 2012                                      | 7.529               | (3.154, 17.975)       | 17/289            | 7/896                |
| Oken E 2007                                         | 2.175               | (0.962, 4.916)        | 6/85              | 53/1633              |
| Papageorghiou AT 2005                               | 1.614               | (1.198, 2.173)        | 47/826            | 322/9132             |
| Pare E 2014                                         | 3.277               | (2.461, 4.364)        | 45/176            | 192/2461             |
| Plasencia W a 2007                                  | 14.268              | (7.742, 26.297)       | 18/181            | 21/3013              |
| Plasencia W b 2008                                  | 11.882              | (6.417, 22.002)       | 16/94             | 21/1466              |
| Poon LCY 2010                                       | 12.688              | (7.926, 20.313)       | 28/241            | 38/4150              |
| Rasmussen S 2000                                    | 11.070              | (10.496, 11.676)      | 1687/12489        | 4367/357885          |
| Suzuki S 2009                                       | 10.434              | (6.597, 16.503)       | 21/160            | 74/5883              |
| Wright D 2012                                       | 9.007               | (7.624, 10.640)       | 203/1821          | 346/27955            |
| <b>Overall (I<sup>2</sup>=9599 % , P&lt; 0.001)</b> | <b>8.378</b>        | <b>(7.078, 9.916)</b> | <b>7065/53355</b> | <b>18225/1641204</b> |

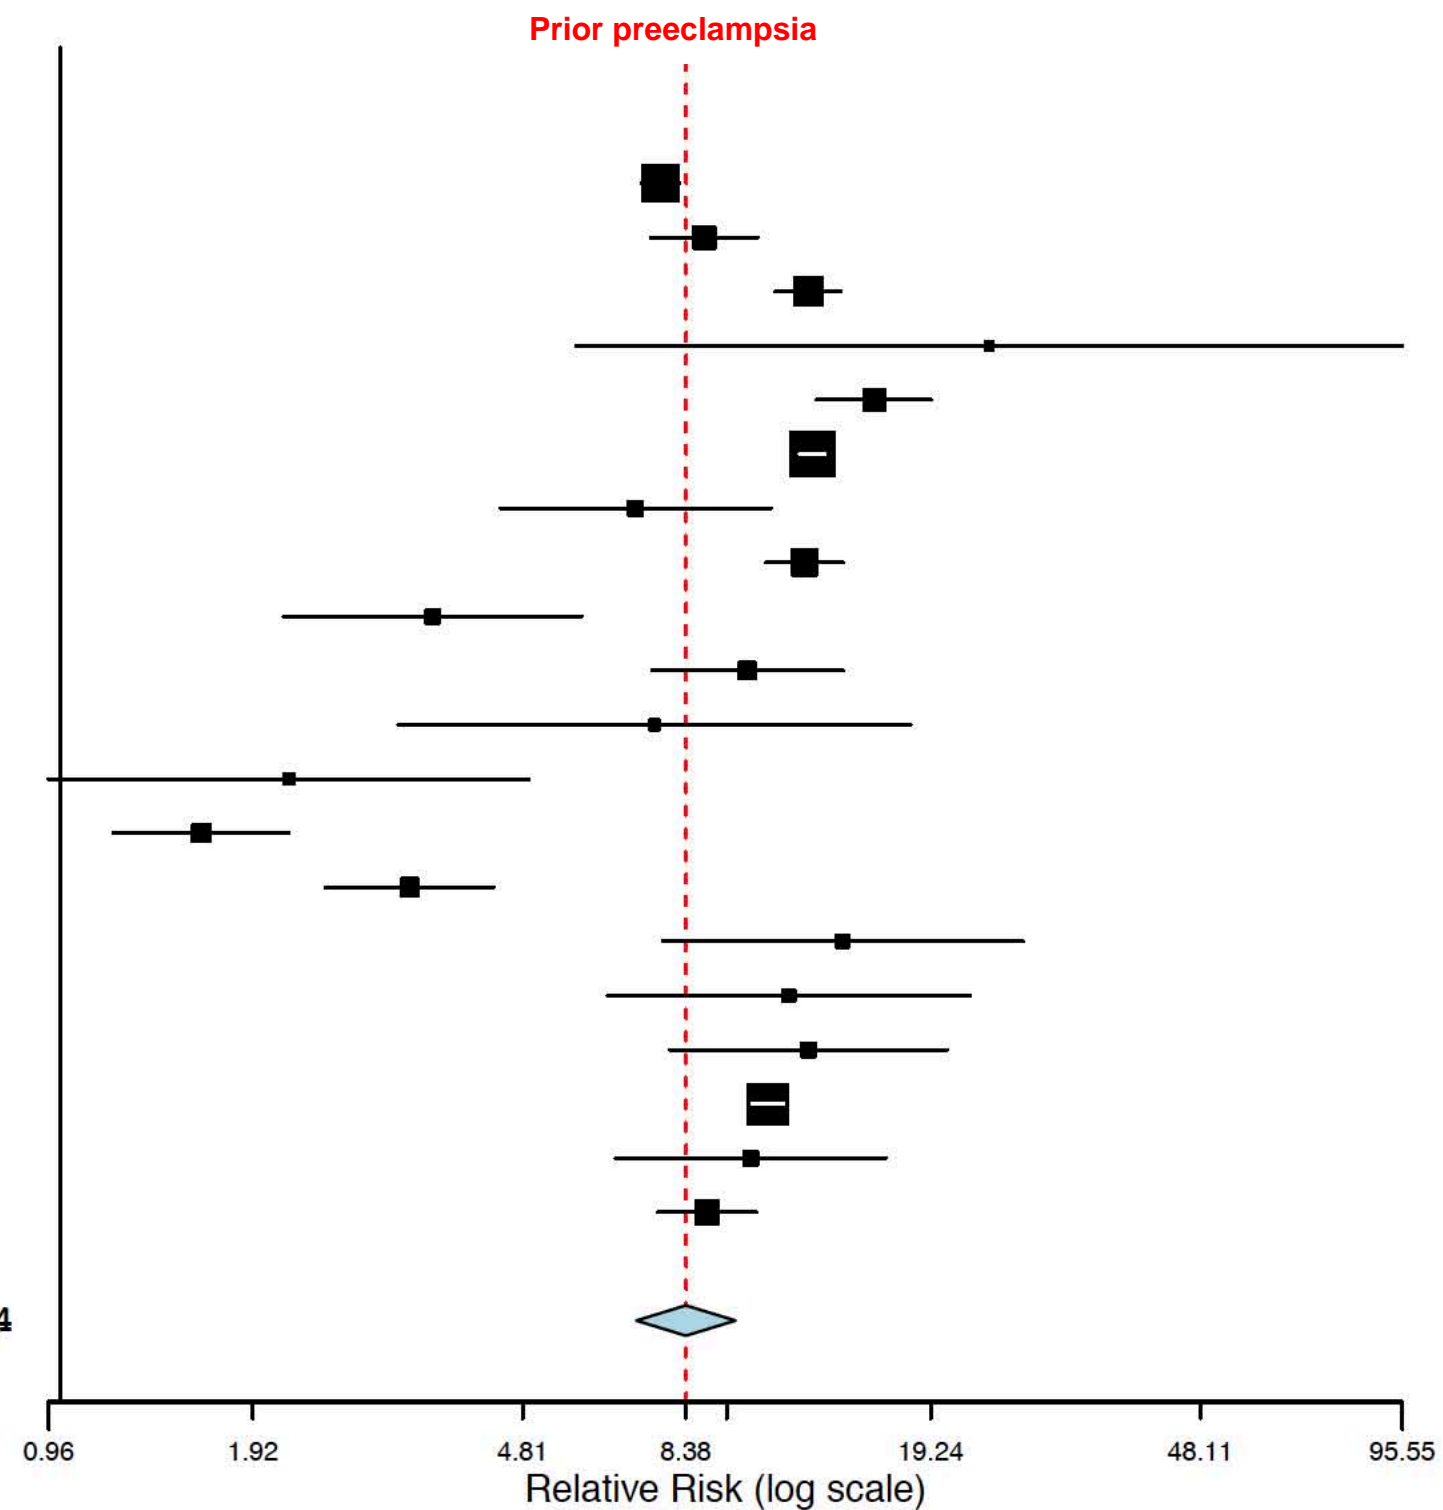

| Studies                                             | Estimate (95% C.I.)         | Ev/Trt            | Ev/Ctrl               |
|-----------------------------------------------------|-----------------------------|-------------------|-----------------------|
| Anderson NH 2012                                    | 4.746 (3.890, 5.791)        | 95/672            | 762/25582             |
| Basso O 2004                                        | 3.459 (2.467, 4.851)        | 38/2449           | 258/57519             |
| Catov JM 2007                                       | 5.010 (4.253, 5.902)        | 132/929           | 1985/69995            |
| Dayan N 2015                                        | 8.154 (6.586, 10.095)       | 64/170            | 448/9703              |
| Di Lorenzo G 2012                                   | 16.656 (4.459, 62.216)      | 2/11              | 23/2107               |
| Erez O 2006                                         | 3.683 (2.601, 5.216)        | 25/79             | 219/2549              |
| Gilbert WM 2007                                     | 2.171 (2.074, 2.274)        | 1741/29917        | 115106/4294985        |
| Goetzinger KR 2010                                  | 4.035 (3.077, 5.291)        | 47/168            | 246/3548              |
| Magnussen EB 2007                                   | 4.080 (1.913, 8.699)        | 6/40              | 127/3454              |
| Mahande MJ 2013                                     | 7.174 (4.160, 12.371)       | 11/47             | 126/3862              |
| Ostlund I 2004                                      | 2.569 (2.334, 2.827)        | 404/5761          | 11605/425091          |
| Papageorghiou AT 2005                               | 6.886 (4.574, 10.367)       | 21/146            | 348/16660             |
| Pare E 2014                                         | 4.315 (3.322, 5.607)        | 53/165            | 184/2472              |
| Plasencia W a 2007                                  | 6.558 (3.010, 14.288)       | 6/54              | 101/5961              |
| Plasencia W b 2008                                  | 5.722 (2.673, 12.250)       | 6/37              | 87/3070               |
| Poon LCY 2010                                       | 7.040 (3.757, 13.193)       | 9/68              | 156/8298              |
| Rasmussen S 2000                                    | 10.721 (9.042, 12.713)      | 112/650           | 5942/369724           |
| Sohlberg S 2012                                     | 3.568 (3.287, 3.872)        | 487/2886          | 23664/500293          |
| Wright D 2012                                       | 9.249 (7.903, 10.825)       | 140/685           | 1286/58199            |
| Zetterstrom K 2005                                  | 4.253 (3.871, 4.672)        | 393/3374          | 18573/678141          |
| <b>Overall (I<sup>2</sup>=9782 % , P&lt; 0.001)</b> | <b>5.064 (3.953, 6.488)</b> | <b>3792/48308</b> | <b>181246/6541213</b> |

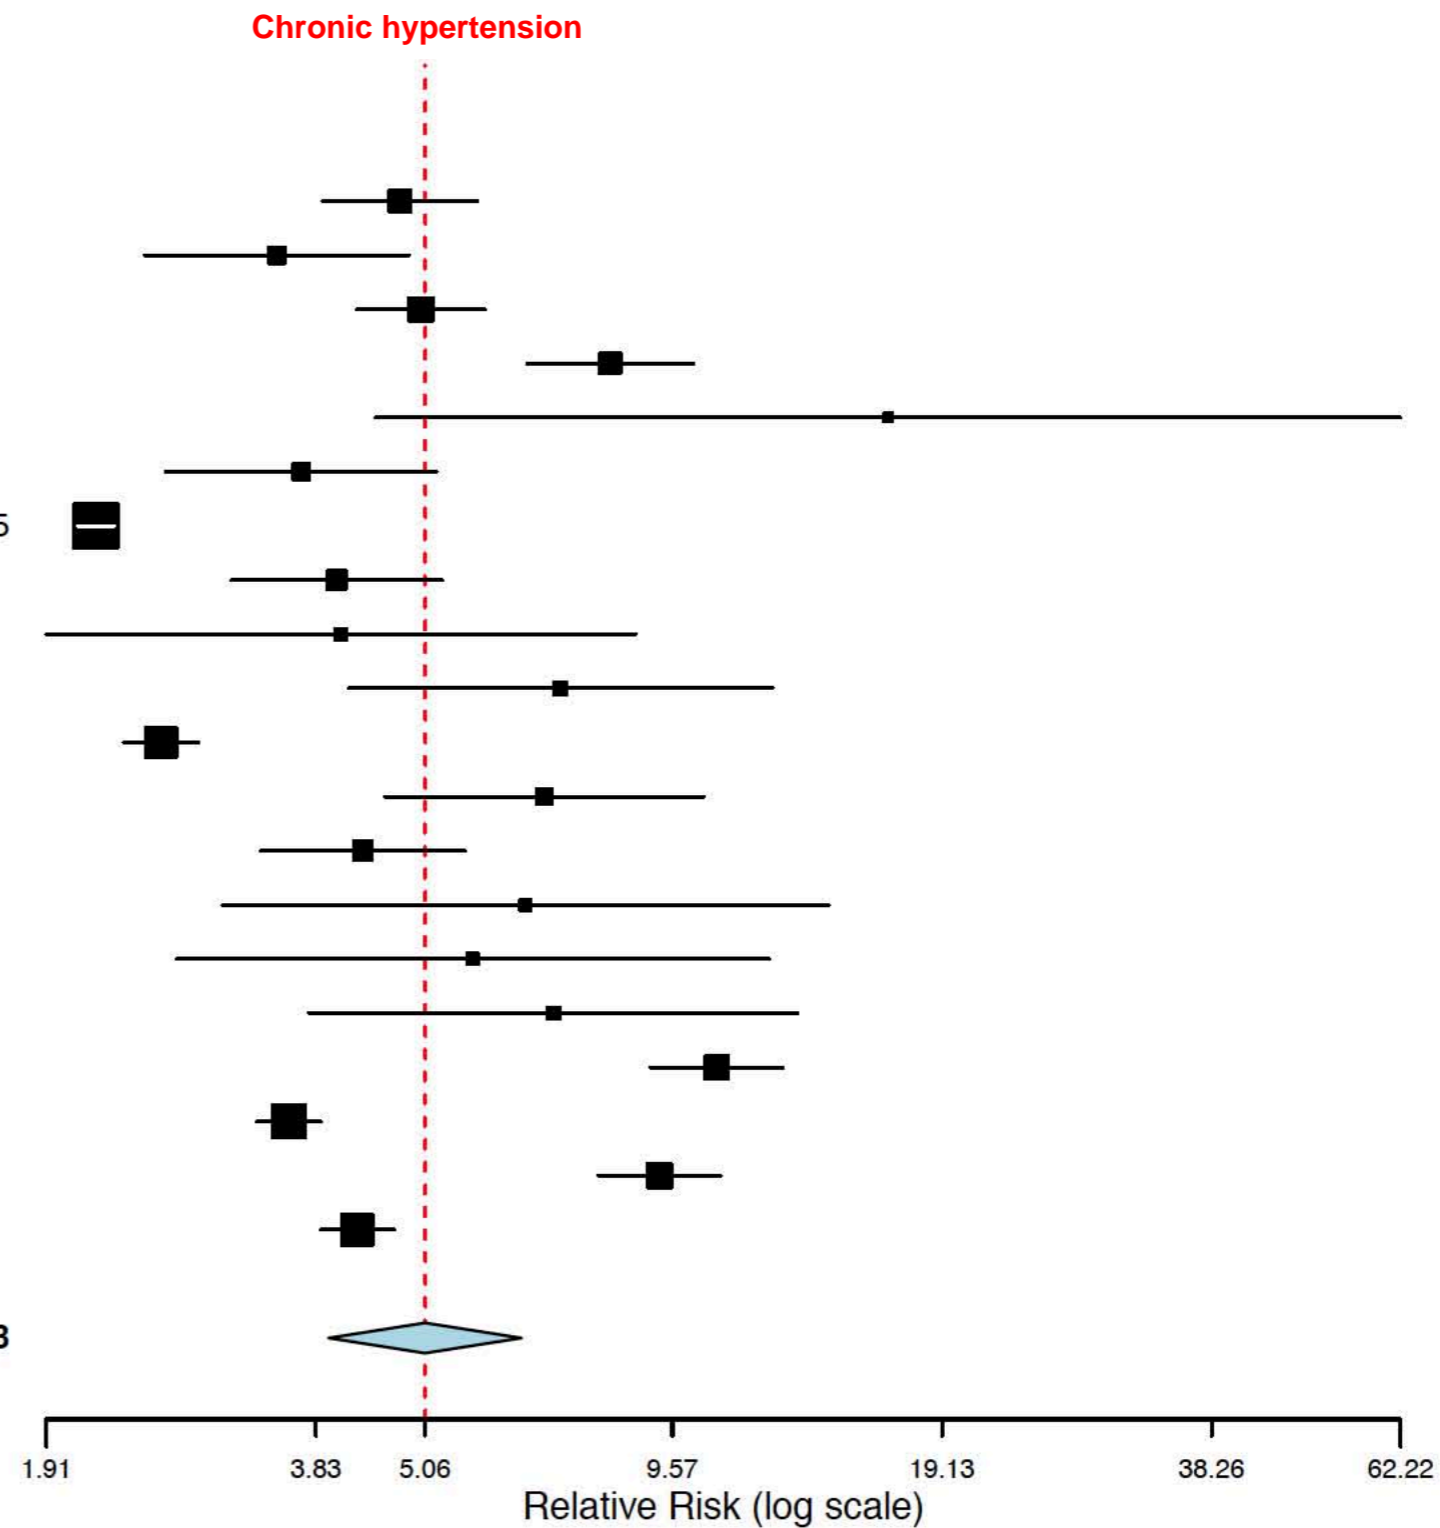

| Studies                                      | Estimate (95% C.I.)         | Ev/Trt       | Ev/Ctrl             |
|----------------------------------------------|-----------------------------|--------------|---------------------|
| Nili F 2013                                  | 2.682 (1.699, 4.233)        | 14/58        | 18989/210987        |
| Plasencia W a 2007                           | 4.044 (0.606, 26.984)       | 1/14         | 106/6001            |
| Plasencia W b 2008                           | 4.151 (0.308, 55.915)       | 0/3          | 93/3104             |
| <b>Overall (I<sup>2</sup>=0 % , P=0.876)</b> | <b>2.775 (1.792, 4.298)</b> | <b>15/75</b> | <b>19188/220092</b> |

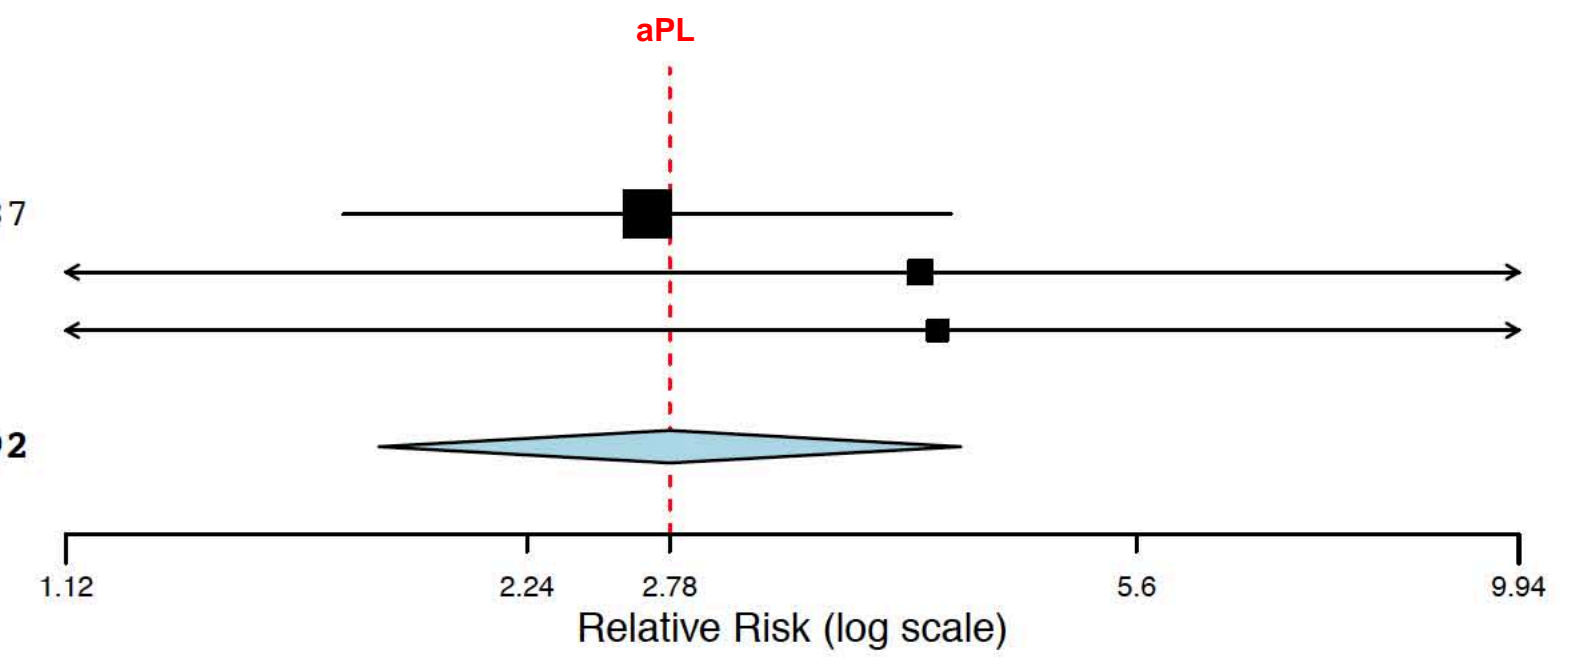

Supplement: bare029374.ww3_default.pdf [file bare029374.ww3_default.pdf]
