# Supplementary material for: Clinical risk factors for pre-eclampsia determined in early pregnancy: systematic review and meta-analysis of large cohort studies
Source: PubMed Central journal article supplement — BMJ. 2016 Apr 19;353:i1753. doi: 10.1136/bmj.i1753 (PMC4837230; doi:10.1136/bmj.i1753), 2016-04-19
Supplement: bare029374.ww1_default.pdf [file bare029374.ww1_default.pdf]

## **Appendix 1: PubMed and Embase search strategies used herein, and the resulting list of all citations from those searches. [posted as supplied by author]**

### **Search strategies:**

We searched PubMed and Embase, restricting our query to publications in English, with abstracts available, from the year 2000 to June 2015.

The **PubMed** search was as follows: [(MeSH terms “*pre-eclampsia, eclampsia, HELLP syndrome, toxemia*”) OR (keywords “*preeclampsia, pre-eclampsia, eclampsia, HELLP syndrome, toxemia*”)] AND [(MeSH terms “*risk factors, causality, etiology, odds ratio*”) OR (keywords “*risk, risk factor\*, odds, cause, etiology, predictor*”)] AND [(MeSH term “*cohort studies*”)]. We applied the following filters: abstracts available, and English language.

The **Embase** search strategy was as follows: [(exploded subject headings “*preeclampsia, eclampsia and preeclampsia, eclampsia, HELLP syndrome, toxemia, pregnancy toxemia*”) OR (keywords “*preeclampsia, pre-eclampsia, eclampsia, HELLP syndrome, toxemia*”)] AND [(exploded subject headings “*risk, risk factor, high risk pregnancy, etiology*) OR (keywords “*risk, risk factor, odds, cause, etiology, predictor*”)] AND [(exploded subject headings “*prospective study, retrospective study, longitudinal study, follow up*”) OR (keywords “*cohort, retrospective, prospective, longitudinal, follow up*”)]. We then applied the following filters: abstracts available, English language articles only, and articles as the publication type.

### **Resulting list of citations:**

1. The Magpie Trial follow up study: Outcome after discharge from hospital for women and children recruited to a trial comparing magnesium sulphate with placebo for pre-eclampsia [ISRCTN86938761]. *BMC pregnancy and childbirth*. 2004 08 Mar;4(5).
2. The Magpie Trial: a randomised trial comparing magnesium sulphate with placebo for pre-eclampsia. Outcome for women at 2 years. *Bjog*. 2007 Mar;114(3):300-9.
3. a Rogvi R, Forman JL, Damm P, Greisen G. Women born preterm or with inappropriate weight for gestational age are at risk of subsequent gestational diabetes and pre-eclampsia. *PloS one*. 2012;7(3):e34001.
4. Aagaard-Tillery KM, Stoddard GJ, Holmgren C, Lacoursiere DY, Fraser A, Mineau GP, et al. Preeclampsia and subsequent risk of cancer in Utah. *Am J Obstet Gynecol*. 2006 Sep;195(3):691-9.
5. Aali BS, Ghafoorian J, Mohamad-Alizadeh S. Severe preeclampsia and eclampsia in Kerman, Iran: Complications and outcomes. *Medical Science Monitor*. 2004 April;10(4):CR163-CR7.
6. Aardenburg R, Spaanderman ME, Ekhart TH, van Eijndhoven HW, van der Heijden OW, Peeters LL. Low plasma volume following pregnancy complicated by pre-eclampsia predisposes for hypertensive disease in a next pregnancy. *Bjog*. 2003 Nov;110(11):1001-6.
7. Abasiattai AM, Utuk NM, Udoma EJ, Umoh AV. Grandmultiparity: outcome of delivery in a tertiary hospital in southern Nigeria. *Niger J Med*. 2011 Jul-Sep;20(3):345-8.
8. Abate M, Lakew Z. Eclampsia a 5 years retrospective review of 216 cases managed in two teaching hospitals in Addis Ababa. *Ethiopian medical journal*. 2006 Jan;44(1):27-31.
9. Abati S, Villa A, Cetin I, Dessole S, Luglie PF, Strohmenger L, et al. Lack of association between maternal periodontal status and adverse pregnancy outcomes: A multicentric epidemiologic study. *Journal of Maternal-Fetal and Neonatal Medicine*. 2013 March;26(4):369-72.
10. Abbas O, Shamseddin A, Temraz S, Haydar A. Posterior reversible encephalopathy syndrome after bevacizumab therapy in a normotensive patient. *BMJ Case Rep*. 2013;2013.

11. Abbasi S, Hirsch D, Davis J, Tolosa J, Stouffer N, Debbs R, et al. Effect of single versus multiple courses of antenatal corticosteroids on maternal and neonatal outcome. *Am J Obstet Gynecol.* 2000 May;182(5):1243-9.
12. Abbassi-Ghanavati M, Alexander JM, McIntire DD, Savani RC, Leveno KJ. Neonatal effects of magnesium sulfate given to the mother. *Am J Perinatol.* 2012 Nov;29(10):795-9.
13. Abdelaziz A, Maher MA, Sayyed TM, Bazeed MF, Mohamed NS. Early pregnancy screening for hypertensive disorders in women without a-priori high risk. *Ultrasound Obstet Gynecol.* 2012 Oct;40(4):398-405.
14. Abdel-Hady el S, Fawzy M, El-Negeri M, Nezar M, Ragab A, Helal AS. Is expectant management of early-onset severe preeclampsia worthwhile in low-resource settings? *Arch Gynecol Obstet.* 2010 Jul;282(1):23-7.
15. Abdul Sultan A, Grainge MJ, West J, Fleming KM, Nelson-Piercy C, Tata LJ. Impact of risk factors on the timing of first postpartum venous thromboembolism: a population-based cohort study from England. *Blood.* 2014 Oct 30;124(18):2872-80.
16. Abdul Sultan A, Tata LJ, Fleming KM, Crooks CJ, Ludvigsson JF, Dhalwani NN, et al. Pregnancy complications and adverse birth outcomes among women with celiac disease: a population-based study from England. *Am J Gastroenterol.* 2014 Oct;109(10):1653-61.
17. Abdullah A, Shaikh AA, Jamro B. Maternal and perinatal outcome associated with eclampsia in a teaching hospital, Sukkur. *Rawal Medical Journal.* 2010 Jan - July;35(1):23-6.
18. Abe E, Omo-Aghoja LO. Maternal mortality at the Central Hospital, Benin City Nigeria: a ten year review. *Afr J Reprod Health.* 2008 Dec;12(3):17-26.
19. Abe T, Ichimaru N, Okumi M, Imamura R, Isaka Y, Takahara S, et al. Pregnancy after renal transplantation: a single-center experience. *International journal of urology : official journal of the Japanese Urological Association.* 2008 Jul;15(7):587-92.
20. Abelin Tornblom S, Ostlund E, Granstrom L, Ekman G. Pre-term cervical ripening and labor induction. *European journal of obstetrics, gynecology, and reproductive biology.* 2002 Sep 10;104(2):120-3.
21. Abenhaim HA, Azoulay L, Holcroft CA, Bure LA, Assayag J, Benjamin A. Incidence, risk factors, and obstetrical outcomes of women with breast cancer in pregnancy. *The breast journal.* 2012 Nov-Dec;18(6):564-8.
22. Abenhaim HA, Azoulay L, Kramer MS, Leduc L. Incidence and risk factors of amniotic fluid embolisms: a population-based study on 3 million births in the United States. *Am J Obstet Gynecol.* 2008 Jul;199(1):49.e1-8.
23. Abenhaim HA, Bujold E, Benjamin A, Kinch RA. Evaluating the role of bedrest on the prevention of hypertensive diseases of pregnancy and growth restriction. *Hypertension in pregnancy.* 2008;27(2):197-205.
24. Abenhaim HA, Kinch RA, Morin L, Benjamin A, Usher R. Effect of prepregnancy body mass index categories on obstetrical and neonatal outcomes. *Archives of Gynecology and Obstetrics.* 2007 January;275(1):39-43.
25. Abetew DF, Enquobahrie DA, Dishu M, Rudra CB, Miller RS, Williams MA. Age at menarche, menstrual characteristics, and risk of preeclampsia. *ISRN Obstetrics and Gynecology.* 2011(472083).
26. Abeyseena C, Jayawardana P, De ASR. Maternal haemoglobin level at booking visit and its effect on adverse pregnancy outcome. *Australian and New Zealand Journal of Obstetrics and Gynaecology.* 2010 October;50(5):423-7.
27. Abha S, Alpana T. Re. Co. De.: A better classification for determination of still births. *Journal of Obstetrics and Gynecology of India.* 2011 December;61(6):656-8.
28. Abhari FR, Ghanbari Andarieh M, Farokhfard A, Ahmady S. Estimating rate of insulin resistance in patients with preeclampsia using Homa-1r index and comparison with nonpreeclampsia pregnant

women. *BioMed Research International*. 2014;2014(140851).

29. Abildgaard U, Sandset PM, Hammerstrom J, Gjestvang FT, Tveit A. Management of pregnant women with mechanical heart valve prosthesis: thromboprophylaxis with low molecular weight heparin. *Thromb Res*. 2009 Jul;124(3):262-7.
30. Abo-Yaqoub S, Kurjak A, Mohammed AB, Shadad A, Abdel-Maaboud M. The role of 4-D ultrasonography in prenatal assessment of fetal neurobehaviour and prediction of neurological outcome. *Journal of Maternal-Fetal and Neonatal Medicine*. 2012 March;25(3):231-6.
31. Aboyeji AP, Ijaiya MA, Fawole AA. Maternal mortality in a Nigerian teaching hospital - a continuing tragedy. *Trop Doct*. 2007 Apr;37(2):83-5.
32. Abraham KA, Connolly G, Farrell J, Walshe JJ. The HELLP syndrome, a prospective study. *Ren Fail*. 2001 Sep;23(5):705-13.
33. Abramovici A, Jauk V, Wetta L, Cantu J, Edwards R, Biggio J, et al. Low-dose aspirin, smoking status, and the risk of spontaneous preterm birth. *American Journal of Perinatology*. 2015 01 Apr;32(5 Supplement 02):445-50.
34. Abu-Heija AT, Jallad MF, Abukteish F. Maternal and perinatal outcome of pregnancies after the age of 45. *The journal of obstetrics and gynaecology research*. 2000 Feb;26(1):27-30.
35. Acharya G, Eschler B, Gronberg M, Hentemann M, Ottersen T, Maltau JM. Noninvasive cerclage for the management of cervical incompetence: a prospective study. *Arch Gynecol Obstet*. 2006 Feb;273(5):283-7.
36. Achkar M, Dodds L, Giguere Y, Forest JC, Armson BA, Woolcott C, et al. Vitamin D status in early pregnancy and risk of preeclampsia. *Am J Obstet Gynecol*. 2015 Apr;212(4):511.e1-7.
37. Acosta CD, Knight M, Lee HC, Kurinczuk JJ, Gould JB, Lyndon A. The continuum of maternal sepsis severity: incidence and risk factors in a population-based cohort study. *PloS one*. 2013;8(7):e67175.
38. Acunas B, Celtik C, Vatansever U, Karasalihoglu S. Thrombocytopenia: an important indicator for the application of partial exchange transfusion in polycythemic newborn infants? *Pediatrics international : official journal of the Japan Pediatric Society*. 2000 Aug;42(4):343-7.
39. Adam I, Haggaz AED, Mirghani OA, Elhassan EM. Placenta previa and pre-eclampsia: Analyses of 1645 cases at Medani Maternity Hospital, Sudan. *Frontiers in Physiology*. 2013;4 FEB(Article 32).
40. Adama-Hondegla AB, Lawson-Evi K, Bassowa A, Modji S, Egbla KF, Akpadza K. Perinatal mortality risk factors of infants born from eclamptic mothers at tokoin teaching hospital of Lome. *Journal of Medical Sciences (Faisalabad)*. 2013;13(5):391-5.
41. Adamczak JE, Wolf EJ. Maternal blood pressure adaptation in the first trimester of pregnancy. *Am J Perinatol*. 2010 Apr;27(4):339-42.
42. Adams SS, Eberhard-Gran M, Hofoss D, Eskild A. Maternal emotional distress in pregnancy and delivery of a small-for-gestational age infant. *Acta Obstet Gynecol Scand*. 2011 Nov;90(11):1267-73.
43. Adams T, Yeh C, Bennett-Kunzier N, Kinzler WL. Long-term maternal morbidity and mortality associated with ischemic placental disease. *Semin Perinatol*. 2014 Apr;38(3):146-50.
44. Adamu AN, Ekele BA, Ahmed Y, Mohammed BA, Isezuo SA, Abdullahpi AA. Pregnancy outcome in women with eclampsia at a tertiary centre in northern Nigeria. *Afr J Med Med Sci*. 2012 Jun;41(2):211-9.
45. Addington S, Larson N, Scofield RH. Milk-alkali syndrome in pre-eclamptic pregnancy: report of a patient and evaluation of albumin-corrected calcium in pre-eclamptic pregnancies. *J Okla State Med Assoc*. 2006 Sep;99(9):480-4.
46. Adelberg AM, Miller J, Doerzbacher M, Lambers DS. Correlation of quantitative protein measurements in 8-, 12-, and 24-hour urine samples for the diagnosis of preeclampsia. *Am J Obstet Gynecol*. 2001 Oct;185(4):804-7.
47. Adeney KL, Williams MA, Miller RS, Frederick IO, Sorensen TK, Luthy DA. Risk of preeclampsia in

relation to maternal history of migraine headaches. *Journal of Maternal-Fetal and Neonatal Medicine*. 2005 September;18(3):167-72.

48. Ade-Ojo IP, Loto OM. Outcome of eclampsia at the Obafemi Awolowo University Teaching Hospital Complex, Ile-Ife. *Nigerian journal of clinical practice*. 2008 Sep;11(3):279-84.
49. Adeoye IA, Onayade AA, Fatusi AO. Incidence, determinants and perinatal outcomes of near miss maternal morbidity in Ile-Ife Nigeria: A prospective case control study. *BMC pregnancy and childbirth*. 2013 15 Apr;13(93).
50. Adeyemi AS, Adekanle DA, Afolabi AF. Predictors of vaginal delivery in nulliparous mothers. *Ann Afr Med*. 2014 Jan-Mar;13(1):35-40.
51. Adeyemo WL, Rabiou KA, Okoturo TM, Adebajo AA, Adewunmi AA, Adeyemi MO. Orofacial injuries associated with eclampsia in patients presenting at a Nigerian Tertiary Hospital. *Journal of obstetrics and gynaecology : the journal of the Institute of Obstetrics and Gynaecology*. 2012 Jan;32(1):54-7.
52. Adeyinka DA, Oladimeji O, Adekanbi TI, Adeyinka FE, Falope Y, Aimakhu C. Outcome of adolescent pregnancies in southwestern Nigeria: a case-control study. *The journal of maternal-fetal & neonatal medicine : the official journal of the European Association of Perinatal Medicine, the Federation of Asia and Oceania Perinatal Societies, the International Society of Perinatal Obstet*. 2010 Aug;23(8):785-9.
53. Adu-Bonsaffoh K, Oppong SA, Binlinla G, Obed SA. Maternal deaths attributable to hypertensive disorders in a tertiary hospital in Ghana. *International journal of gynaecology and obstetrics: the official organ of the International Federation of Gynaecology and Obstetrics*. 2013 Nov;123(2):110-3.
54. Adusumalli J, Han CS, Beckham S, Bartholomew ML, Williams J, 3rd. Chorionic villus sampling and risk for hypertensive disorders of pregnancy. *Am J Obstet Gynecol*. 2007 Jun;196(6):591.e1-7; discussion .e7.
55. Aebi-Popp K, Lapaire O, Glass TR, Vilen L, Rudin C, Elzi L, et al. Pregnancy and delivery outcomes of HIV infected women in Switzerland 2003-2008. *J Perinat Med*. 2010 Jul;38(4):353-8.
56. Afessa B, Green B, Delke I, Koch K. Systemic inflammatory response syndrome, organ failure, and outcome in critically ill obstetric patients treated in an ICU. *Chest*. 2001 Oct;120(4):1271-7.
57. Afjeh SA, Sabzehei MK, Esmaili F. Neonatal resuscitation in the delivery room from a tertiary level hospital: Risk factors and outcome. *Iranian Journal of Pediatrics*. 2013;23(6):675-80.
58. Afolabi BB, Iwuala NC, Iwuala IC, Ogedengbe OK. Morbidity and mortality in sickle cell pregnancies in Lagos, Nigeria: a case control study. *Journal of obstetrics and gynaecology : the journal of the Institute of Obstetrics and Gynaecology*. 2009 Feb;29(2):104-6.
59. Afrakhteh M, Moeini A, Taheri MS, Haghighatkah HR, Fakhri M, Masoom N. Uterine Doppler velocimetry of the uterine arteries in the second and third trimesters for the prediction of gestational outcome. *Rev Bras Ginecol Obstet*. 2014 Jan;36(1):35-9.
60. Afzal MF, Anjum A, Sultan MA. Risk factor analysis in asphyxiated newborns and their outcome in relation to stage of hypoxic ischemic encephalopathy. *Pakistan Paediatric Journal*. 2007 June;31(2):63-8.
61. Agan T, Archibong EI, Ekabua JE, Ekanem EI, Abeshi SE, Edentekhe TA, et al. Trends in maternal mortality at the University of Calabar Teaching Hospital, Nigeria, 1999-2009. *International Journal of Women's Health*. 2010;2(1):249-54.
62. Aggarwal N, Suri V, Singla R, Chopra S, Sikka P, Shah VN, et al. Pregnancy outcome in hyperthyroidism: A case control study. *Gynecologic and Obstetric Investigation*. 2014;77(2):94-9.
63. Aggarwal N, Suri V, Soni S, Chopra V, Kohli HS. A prospective comparison of random urine protein-creatinine ratio vs 24-hour urine protein in women with preeclampsia. *Medscape journal of medicine*. 2008;10(4):98.
64. Aggarwal P, Zutshi V, Batra S. Role of hyoscine N-butyl bromide (HBB, Buscopan) as labor

analgesic. *Indian Journal of Medical Sciences*. 2008 01 May;62(5):179-84.

65. Aggarwal PK, Jain V, Srinivasan R, Jha V. Maternal EDN1 G5665T polymorphism influences circulating endothelin-1 levels and plays a role in determination of preeclampsia phenotype. *Journal of Hypertension*. 2009;27(10):2044-50.

66. Aggarwal S, Dimri N, Tandon I, Agarwal S. Preeclampsia in North Indian women: the contribution of genetic polymorphisms. *The journal of obstetrics and gynaecology research*. 2011 Oct;37(10):1335-41.

67. Aghamohammadi A. Use of 24-hour urinary calcium for prediction of preeclampsia. *HealthMED*. 2012;6(9):3070-2.

68. Aghideh FK, Mullin PM, Ingles S, Ouzounian JG, Opper N, Wilson ML, et al. A comparison of obstetrical outcomes with labor induction agents used at term. *Journal of Maternal-Fetal and Neonatal Medicine*. 2014 April;27(6):592-6.

69. Agida ET, Adeka BI, Jibril KA. Pregnancy outcome in eclamptics at the University of Abuja Teaching Hospital, Gwagwalada, Abuja: a 3 year review. *Nigerian journal of clinical practice*. 2010 Dec;13(4):394-8.

70. Ago BU, Abeshi S, Njoku C, Agan TU, Ekabua J. Obstetric outcomes of booked teenage pregnancies at University of Calabar Teaching Hospital, Nigeria. *Adolescent Health, Medicine and Therapeutics*. 2012;3:105-9.

71. Agostini A, De Guibert F, Salari K, Crochet P, Bretelle F, Gamerre M. Adverse Obstetric Outcomes at Term after Hysteroscopic Metroplasty. *Journal of Minimally Invasive Gynecology*. 2009 July/August;16(4):454-7.

72. Aguilar OC, Mendoza YRC, Cuevas MJH. Influenza AH1N1 en poblacion obstetrica de un hospital general de Oaxaca. *Ginecologia y Obstetricia de Mexico*. 2011;79(6):344-50.

73. Ahmad SMS, Hazlina NHN, Che Anuar CY, Faridah AR, Shukri Y. A study on factors affecting newborn weight and large for gestational age (LGA) newborns in non-diabetic mothers: The role of maternal serum triglycerides. *International Medical Journal*. 2006 March;13(1):53-8.

74. Ahn KJ, You WJ, Jeong SL, Lee JW, Kim BS, Lee JH, et al. Atypical manifestations of reversible posterior leukoencephalopathy syndrome: findings on diffusion imaging and ADC mapping. *Neuroradiology*. 2004 Dec;46(12):978-83.

75. Aibar L, Puertas A, Valverde M, Carrillo MP, Montoya F. Fetal sex and perinatal outcomes. *Journal of Perinatal Medicine*. 2012 01 Apr;40(3):271-6.

76. Aikio O, Metsola J, Vuolteenaho R, Perhomaa M, Hallman M. Transient defect in nitric oxide generation after rupture of fetal membranes and responsiveness to inhaled nitric oxide in very preterm infants with hypoxic respiratory failure. *Journal of Pediatrics*. 2012 September;161(3):397-403.e1.

77. Aimukhametova G, Ukybasova T, Hamidullina Z, Zhubanysheva K, Harun-Or-Rashid M, Yoshida Y, et al. The impact of maternal obesity on mother and neonatal health: study in a tertiary hospital of Astana, Kazakhstan. *Nagoya J Med Sci*. 2012 Feb;74(1-2):83-92.

78. Ainuddin J, Karim N, Hasan AA, Naqvi SA. Metformin versus insulin treatment in gestational diabetes in pregnancy in a developing country. A randomized control trial. *Diabetes Research and Clinical Practice*. 2015 01 Feb;107(2):290-9.

79. Airede LR, Ekele BA. Adolescent maternal mortality in Sokoto, Nigeria. *Journal of obstetrics and gynaecology : the journal of the Institute of Obstetrics and Gynaecology*. 2003 Mar;23(2):163-5.

80. Aivazoglou L, Sass N, Silva HT, Jr., Sato JL, Medina-Pestana JO, De Oliveira LG. Pregnancy after renal transplantation: an evaluation of the graft function. *European journal of obstetrics, gynecology, and reproductive biology*. 2011 Apr;155(2):129-31.

81. Ajuzieogu OV, Ezike HA, Amucheazi AO, Enwereji J. A retrospective study of the outcome of cesarean section for women with severe pre-eclampsia in a third world setting. *Saudi Journal of Anaesthesia*. 2011 January-March;5(1):15-8.

82. Akar ME, Eyi EG, Yilmaz ES, Yuksel B, Yilmaz Z. Maternal deaths and their causes in Ankara, Turkey, 1982-2001. *Journal of health, population, and nutrition*. 2004 Dec;22(4):420-8.
83. Akbar SA, Khawaja NP, Brown PR, Tayyeb R, Bamfo J, Nicolaides KH. Angiotensin II type 1 and 2 receptors gene polymorphisms in pre-eclampsia and normal pregnancy in three different populations. *Acta Obstet Gynecol Scand*. 2009;88(5):606-11.
84. Akcan AB, Oygucu SE, Ozel D, Oygur N. Mean platelet volumes in babies of preeclamptic mothers. *Blood coagulation & fibrinolysis : an international journal in haemostasis and thrombosis*. 2011 Jun;22(4):285-7.
85. Akhlaghi F, Hamedy AB. Comparison of maternal and fetal/neonatal complications in gestational and pre-gestational diabetes mellitus. *Acta Medica Iranica*. 2005;43(4):263-7.
86. Akhter N, Rahman F, Salman M, Anam K, Banerjee SK, Amin SA, et al. Outcome of pregnancy in patients with congenital heart diseases. *Mymensingh Med J*. 2011 Oct;20(4):620-4.
87. Akintunde AA, Opadijo OG. Case report of a 26 year old primigravida with Patent Ductus Arteriosus (PDA) in heart failure. *African Health Sciences*. 2011;11(1):138-40.
88. Akkermans J, Payne B, von Dadelszen P, Groen H, Vries J, Magee LA, et al. Predicting complications in pre-eclampsia: external validation of the fullPIERS model using the PETRA trial dataset. *European journal of obstetrics, gynecology, and reproductive biology*. 2014 Aug;179:58-62.
89. Akolekar R, Minekawa R, Veduta A, Romero XC, Nicolaides KH. Maternal plasma inhibin A at 11-13 weeks of gestation in hypertensive disorders of pregnancy. *Prenatal diagnosis*. 2009 Aug;29(8):753-60.
90. Al Duraihimh H, Ghamdi G, Moussa D, Shaheen F, Mohsen N, Sharma U, et al. Outcome of 234 pregnancies in 140 renal transplant recipients from five middle eastern countries. *Transplantation*. 2008 Mar 27;85(6):840-3.
91. Al Jama FE, Gasem T, Burshaid S, Rahman J, Al Suleiman SA, Rahman MS. Pregnancy outcome in patients with homozygous sickle cell disease in a university hospital, Eastern Saudi Arabia. *Archives of Gynecology and Obstetrics*. 2009 November;280(5):793-7.
92. Al Kahtani MA, AlQahtani M, Alshebaily MM, Abd Elzaher M, Moawad A, Aljohani N. Morbidity and pregnancy outcomes associated with sickle cell anemia among Saudi women. *International journal of gynaecology and obstetrics: the official organ of the International Federation of Gynaecology and Obstetrics*. 2012 Dec;119(3):224-6.
93. Al Mashaleh M, Gharaibeh A, Al Serhan A, Matar K, Burgan A, Khataybeh O, et al. Neonatal and obstetric outcome of systemic lupus erythematosus at King Hussein Medical Center, Amman Jordan. *Rawal Medical Journal*. 2014;39(4):449-51.
94. al Riyami N, Walker MG, Proctor LK, Yinon Y, Windrim RC, Kingdom JC. Utility of head/abdomen circumference ratio in the evaluation of severe early-onset intrauterine growth restriction. *Journal of obstetrics and gynaecology Canada : JOGC = Journal d'obstetrique et gynecologie du Canada : JOGC*. 2011 Jul;33(7):715-9.
95. Al Rowaily MA, Alsalem FA, Abolfotouh MA. Cesarean section in a high-parity community in Saudi Arabia: clinical indications and obstetric outcomes. *BMC pregnancy and childbirth*. 2014;14:92.
96. Alan S, Arsan S, Okulu E, Akin IM, Kilic A, Taskin S, et al. Effects of umbilical cord milking on the need for packed red blood cell transfusions and early neonatal hemodynamic adaptation in preterm infants born < 1500 g: A prospective, randomized, controlled trial. *Journal of Pediatric Hematology/Oncology*. 2014 08 Nov;36(8):e493-e8.
97. Alanis MC, Robinson CJ, Hulsey TC, Ebeling M, Johnson DD. Early-onset severe preeclampsia: induction of labor vs elective cesarean delivery and neonatal outcomes. *Am J Obstet Gynecol*. 2008 Sep;199(3):262.e1-6.
98. Alanis MC, Villers MS, Law TL, Steadman EM, Robinson CJ. Complications of cesarean delivery in the massively obese parturient. *American Journal of Obstetrics and Gynecology*. 2010

September;203(3):271.e1-e7.

99. Alayed N, Kezouh A, Oddy L, Abenhaim HA. Sickle cell disease and pregnancy outcomes: population-based study on 8.8 million births. *J Perinat Med*. 2014 Jul;42(4):487-92.
100. Alchalabi HA, Al Habashneh R, Jabali OA, Khader YS. Association between periodontal disease and adverse pregnancy outcomes in a cohort of pregnant women in Jordan. *Clinical and experimental obstetrics & gynecology*. 2013;40(3):399-402.
101. Aldemir EY, Kavuncuoglu S, Yesinel S, Yildiz H. Evaluation of growth in very low birth weight preterm babies. *Turk Pediatri Arsivi*. 2014 01 Dec;49(4):289-98.
102. Alecsandru D, Garrido N, Vicario JL, Barrio A, Aparicio P, Requena A, et al. Maternal KIR haplotype influences live birth rate after double embryo transfer in IVF cycles in patients with recurrent miscarriages and implantation failure. *Human reproduction*. 2014 26 Jun;29(12):2637-43.
103. Alexander F, Chiu L, Kroh M, Hammel J, Moore J. Analysis of outcome in 298 extremely low-birth-weight infants with patent ductus arteriosus. *J Pediatr Surg*. 2009 Jan;44(1):112-7; discussion 7.
104. Alexander JM, McIntire DD, Leveno KJ, Cunningham FG. Selective magnesium sulfate prophylaxis for the prevention of eclampsia in women with gestational hypertension. *Obstet Gynecol*. 2006 Oct;108(4):826-32.
105. Al-Farsi SH, Al-Riyami NM, Al-Khabori MK, Al-Hunaini MN. Maternal complications and the association with baseline variables in pregnant women with sickle cell disease. *Hemoglobin*. 2013;37(3):219-26.
106. Alfirevic Z, Mousa HA, Martlew V, Briscoe L, Perez-Casal M, Toh CH. Postnatal screening for thrombophilia in women with severe pregnancy complications. *Obstet Gynecol*. 2001 May;97(5 Pt 1):753-9.
107. Algert CS, Morris JM, Simpson JM, Ford JB, Roberts CL. Labor before a primary cesarean delivery: Reduced risk of uterine rupture in a subsequent trial of labor for vaginal birth after cesarean. *Obstetrics and Gynecology*. 2008 November;112(5):1061-6.
108. Alguel G, Vormittag R, Simanek R, Kyrle PA, Quehenberger P, Mannhalter C, et al. Preeclampsia and pregnancy loss in women with a history of venous thromboembolism and prophylactic low-molecular-weight heparin (LMWH) during pregnancy. *Thromb Haemost*. 2006 Sep;96(3):285-9.
109. Al-Haddabi R, Al-Bash M, Al-Mabaihsi N, Al-Maqbali N, Al-Dhughhaishi T, Abu-Heija A. Obstetric and perinatal outcomes of teenage pregnant women attending a tertiary teaching hospital in Oman. *Oman Medical Journal*. 2014;29(6):399-403.
110. Alhamdan D, Bignardi T, Condous G. Recognising gestational trophoblastic disease. *Best Practice and Research: Clinical Obstetrics and Gynaecology*. 2009 August;23(4):565-73.
111. Ali AA, Adam I. Lack of antenatal care, education, and high maternal mortality in Kassala hospital, eastern Sudan during 2005-2009. *The journal of maternal-fetal & neonatal medicine : the official journal of the European Association of Perinatal Medicine, the Federation of Asia and Oceania Perinatal Societies, the International Society of Perinatal Obstet*. 2011 Aug;24(8):1077-8.
112. Ali AAA, Elgessim ME, Taha E, Adam GK. Factors associated with perinatal mortality in Kassala, Eastern Sudan: A community-based study 2010-2011. *Journal of Tropical Pediatrics*. 2014 February;60(1):79-82.
113. Alijotas-Reig J, Casellas-Caro M, Ferrer-Oliveras R, Llubra-Olive E, Hermosilla E, Vilardell-Tarres M, et al. Are anti-beta-glycoprotein-I antibodies markers for recurrent pregnancy loss in lupus anticoagulant/anticardiolipin seronegative women? *American journal of reproductive immunology (New York, NY : 1989)*. 2008 Sep;60(3):229-37.
114. Aliyu MH, Luke S, Kristensen S, Alio AP, Salihu HM. Joint effect of obesity and teenage pregnancy on the risk of preeclampsia: a population-based study. *The Journal of adolescent health : official publication of the Society for Adolescent Medicine*. 2010 Jan;46(1):77-82.

115. Aliyu MH, Lynch O, Saidu R, Alio AP, Marty PJ, Salihu HM. Intrauterine exposure to tobacco and risk of medically indicated and spontaneous preterm birth. *American Journal of Perinatology*. 2010;27(5):405-10.
116. Aliyu MH, Lynch O, Wilson RE, Alio AP, Kristensen S, Marty PJ, et al. Association between tobacco use in pregnancy and placenta-associated syndromes: a population-based study. *Arch Gynecol Obstet*. 2011 Apr;283(4):729-34.
117. Aliyu MH, Salihu HM, Wilson RE, Kirby RS. Prenatal smoking and risk of intrapartum stillbirth. *Archives of Environmental and Occupational Health*. 2007 Summer;62(2):87-92.
118. Al-Jameil N, Tabassum H, Ali MN, Qadeer MA. Lipid profile and its effect on kidney in pregnancy-induced preeclampsia: A prospective case-controlled study on patients of Riyadh, Saudi Arabia. *Biomedical Research (India)*. 2014 October-December;25(4):515-21.
119. Al-Jameil N, Tabassum H, Al-Mayouf H, Aljohar HI, Alenzi ND, Hijazy SM, et al. Analysis of serum trace elements-copper, manganese and zinc in preeclamptic pregnant women by inductively coupled plasma optical emission spectrometry: a prospective case controlled study in Riyadh, Saudi Arabia. *Int J Clin Exp Pathol*. 2014;7(5):1900-10.
120. Al-Jameil N, Tabassum H, Al-Mayouf H, Al-Otay L, Aziz Khan F. Liver function tests as probable markers of preeclampsia - A prospective study conducted in riyadh  
Preeklampsi muhtemel belirteçleri olarak karaciğer fonksiyon testleri - Riyad, Suudi Arabistan'da yapılan bir prospektif çalışma. *Journal of Clinical and Analytical Medicine*. 2015;6(4):461-4.
121. Alkazaleh F, Viero S, Simchen M, Walker M, Smith G, Laskin C, et al. Ultrasound diagnosis of severe thrombotic placental damage in the second trimester: an observational study. *Ultrasound Obstet Gynecol*. 2004 May;23(5):472-6.
122. Allais G, Castagnoli Gabellari I, Airola G, Schiapparelli P, Terzi MG, Mana O, et al. Is migraine a risk factor in pregnancy? *Neurological Sciences*. 2007 May;28(SUPPL. 2):S184-S7.
123. Allais G, Gabellari IC, Borgogno P, De Lorenzo C, Benedetto C. The risks of women with migraine during pregnancy. *Neurological Sciences*. 2010 June;31(SUPPL.1):S59-S61.
124. Allvin K, Hellstrom A, Dahlgren J, Andersson Gronlund M. Birth weight is the most important predictor of abnormal retinal vascularisation in moderately preterm infants. *Acta paediatrica (Oslo, Norway : 1992)*. 2014 Jun;103(6):594-600.
125. Al-Mulhim AA, Abu-Heija A, Al-Jamma F, El-Harith el HA. Pre-eclampsia: maternal risk factors and perinatal outcome. *Fetal Diagn Ther*. 2003 Jul-Aug;18(4):275-80.
126. Alper AB, Outland J, Finigan K, Pridjian G, Aina-Mumuney A, Puschett JB. Phenotypic characteristics shared by preeclamptic patients and an animal model of the syndrome: report of a pilot study. *American journal of hypertension*. 2006 Sep;19(9):947-50.
127. Alran S, Sibony O, Luton D, Touitou S, Fourchette V, Feraud O, et al. Maternal and neonatal outcome of 93 consecutive triplet pregnancies with 71% vaginal delivery. *Acta Obstet Gynecol Scand*. 2004 Jun;83(6):554-9.
128. Al-Safi Z, Imudia AN, Filetti LC, Hobson DT, Bahado-Singh RO, Awonuga AO. Delayed postpartum preeclampsia and eclampsia: demographics, clinical course, and complications. *Obstet Gynecol*. 2011 Nov;118(5):1102-7.
129. Alshammari A, Hanley A, Ni A, Tomlinson G, Feig DS. Does the presence of polycystic ovary syndrome increase the risk of obstetrical complications in women with gestational diabetes? *The journal of maternal-fetal & neonatal medicine : the official journal of the European Association of Perinatal Medicine, the Federation of Asia and Oceania Perinatal Societies, the International Society of Perinatal Obstet*. 2010 Jun;23(6):545-9.
130. Alshohaib S. Outcome of pregnancy in patients with inactive systemic lupus erythromatosus and minimal proteinuria. *Saudi J Kidney Dis Transpl*. 2009 Sep;20(5):802-5.
131. Alsnes IV, Janszky I, Forman MR, Vatten LJ, Okland I. A population-based study of associations



between preeclampsia and later cardiovascular risk factors. *Am J Obstet Gynecol.* 2014 Dec;211(6):657.e1-7.

132. Al-Taani MI. Comparison of prostaglandin E2 tablets or Foley catheter for labour induction in grand multiparas. *Eastern Mediterranean health journal = La revue de sante de la Mediterranee orientale = al-Majallah al-sihhiyah li-sharq al-mutawassit.* 2004 Jul-Sep;10(4-5):547-53.
133. Altas M, Serefhan A, Silav G, Cerci A, Coskun KK, Elmaci I. Diagnosis and management of pituitary abscess: a case series and review of the literature. *Turk Neurosurg.* 2013;23(5):611-6.
134. Altieri P, Gambineri A, Prontera O, Cionci G, Franchina M, Pasquali R. Maternal polycystic ovary syndrome may be associated with adverse pregnancy outcomes. *European Journal of Obstetrics Gynecology and Reproductive Biology.* 2010 March;149(1):31-6.
135. Altintepe L, Gezginc K, Tonbul HZ, Celik C, Guney I, Gezginc ST, et al. Etiology and prognosis in 36 acute renal failure cases related to pregnancy in central Anatolia. *European Journal of General Medicine.* 2005 July/September;2(3):110-3.
136. Altintepe L, Guney I, Tonbul Z, Demir M, Turk S, Yeksan M. Assessment of acute renal failure patients treated in our nephrology clinic between 1996 and 2002. *Transplant Proc.* 2004 Dec;36(10):3002-5.
137. Altuntas EE, Yenicesu AG, Mutlu AE, Muderris S, Cetin M, Cetin A. An evaluation of the effects of hypertension during pregnancy on postpartum hearing as measured by transient-evoked otoacoustic emissions. *Acta otorhinolaryngologica Italica : organo ufficiale della Societa italiana di otorinolaringologia e chirurgia cervico-facciale.* 2012 Feb;32(1):31-6.
138. Al-Turki HA, Abu-Heija AT, Al-Sibai MH. The outcome of pregnancy in elderly primigravidas. *Saudi medical journal.* 2003 Nov;24(11):1230-3.
139. Alvarez-Fernandez I, Prieto B, Rodriguez V, Ruano Y, Escudero AI, Alvarez FV. New biomarkers in diagnosis of early onset preeclampsia and imminent delivery prognosis. *Clinical Chemistry and Laboratory Medicine.* 2014 01 Aug;52(8):1159-68.
140. Alves E, Azevedo A, Rodrigues T, Santos AC, Barros H. Impact of risk factors on hypertensive disorders in pregnancy, in primiparae and multiparae. *Annals of human biology.* 2013 Sep-Oct;40(5):377-84.
141. Alwasel SH, Abotalib Z, Aljarallah JS, Osmond C, Al Omar SY, Harrath A, et al. The breadth of the placental surface but not the length is associated with body size at birth. *Placenta.* 2012 Aug;33(8):619-22.
142. Aly H, Hammad T, Nada A, Mohamed M, Bathgate S, El-Mohandes A. Maternal obesity, associated complications and risk of prematurity. *Journal of Perinatology.* 2010 July;30(7):447-51.
143. Amaru RC, Bush MC, Berkowitz RL, Lapinski RH, Gaddipati S. Is discordant growth in twins an independent risk factor for adverse neonatal outcome? *Obstet Gynecol.* 2004 Jan;103(1):71-6.
144. Amaya Garcia MJ, Acosta Fera M, Soto Moreno A, Dios Fuentes E, Navarro Gonzalez E, Quijada Thong D, et al. Primary hyperparathyroidism in pregnancy. *Gynecological Endocrinology.* 2004 August;19(2):111-4.
145. Ameratunga D, Weston G, Osianlis T, Catt J, Vollenhoven B. In vitro fertilisation (IVF) with donor eggs in post-menopausal women: Are there differences in pregnancy outcomes in women with premature ovarian failure (POF) compared with women with physiological age-related menopause? *Journal of Assisted Reproduction and Genetics.* 2009;26(9-10):511-4.
146. Amin SB, Scholer L, Srivastava M. Pre-discharge iron status and its determinants in premature infants. *Journal of Maternal-Fetal and Neonatal Medicine.* 2012 November;25(11):2265-9.
147. Amorim MMR, Katz L, Barros AS, Almeida TSF, Souza ASR, Faundes A. Maternal outcomes according to mode of delivery in women with severe preeclampsia: A cohort study. *Journal of Maternal-Fetal and Neonatal Medicine.* 2015 01 Apr;28(6):654-60.
148. Amsalem D, Aricha-Tamir B, Levi I, Shai D, Sheiner E. Obstetric outcomes after restrictive

bariatric surgery: What happens after 2 consecutive pregnancies? *Surgery for Obesity and Related Diseases*. 2014 May-June;10(3):445-9.

149. Ananth CV, Keyes KM, Wapner RJ. Pre-eclampsia rates in the United States, 1980-2010: age-period-cohort analysis. *Bmj*. 2013;347:f6564.

150. Ananth CV, Peltier MR, Chavez MR, Kirby RS, Getahun D, Vintzileos AM. Recurrence of ischemic placental disease. *Obstet Gynecol*. 2007 Jul;110(1):128-33.

151. Ananth CV, Smulian JC, Demissie K, Vintzileos AM, Knuppel RA. Placental abruption among singleton and twin births in the United States: risk factor profiles. *American journal of epidemiology*. 2001 Apr 15;153(8):771-8.

152. Ananth CV, Smulian JC, Vintzileos AM. Ischemic placental disease: Maternal versus fetal clinical presentations by gestational age. *Journal of Maternal-Fetal and Neonatal Medicine*. 2010 August;23(8):887-93.

153. Ananth CV, Vintzileos AM. Maternal-fetal conditions necessitating a medical intervention resulting in preterm birth. *Am J Obstet Gynecol*. 2006 Dec;195(6):1557-63.

154. Ananth CV, Vintzileos AM. Ischemic placental disease: epidemiology and risk factors. *European journal of obstetrics, gynecology, and reproductive biology*. 2011 Nov;159(1):77-82.

155. Anastasakis E, Papantoniou N, Daskalakis G, Mesogitis S, Antsaklis A. Screening for pre-eclampsia by oxidative stress markers and uteroplacental blood flow. *Journal of obstetrics and gynaecology : the journal of the Institute of Obstetrics and Gynaecology*. 2008 Apr;28(3):285-9.

156. Anastasakis E, Paraskevas KI, Papantoniou N, Daskalakis G, Mesogitis S, Mikhailidis DP, et al. Association between abnormal uterine artery Doppler flow velocimetry, risk of preeclampsia, and indices of arterial structure and function: a pilot study. *Angiology*. 2008 Aug-Sep;59(4):493-9.

157. Anastasiadis P, Tsikouras P, Galazios G, Liberis V, Grapsas X, Koutlaki N, et al. Hypertensive disorders in pregnancy: risk factors and epidemiologic analysis. *Clinical and experimental obstetrics & gynecology*. 2007;34(3):154-8.

158. Aude A, Olagbuji B, Ezeanochie M. An audit of maternal deaths from a referral university teaching hospital in Nigeria: the emergence of HIV/AIDS as a leading cause. *Niger Postgrad Med J*. 2012 Jun;19(2):83-7.

159. Andersen SL, Laurberg P, Wu CS, Olsen J. Attention deficit hyperactivity disorder and autism spectrum disorder in children born to mothers with thyroid dysfunction: A Danish nationwide cohort study. *BJOG: An International Journal of Obstetrics and Gynaecology*. 2014 01 Oct;121(11):1365-74.

160. Andersen SL, Olsen J, Wu CS, Laurberg P. Psychiatric disease in late adolescence and young adulthood. Foetal programming by maternal hypothyroidism? *Clinical Endocrinology*. 2014 July;81(1):126-33.

161. Anderson CM, Ralph JL, Wright ML, Linggi B, Ohm JE. DNA methylation as a biomarker for preeclampsia. *Biol Res Nurs*. 2014 Oct;16(4):409-20.

162. Anderson NH, McCowan LM, Fyfe EM, Chan EH, Taylor RS, Stewart AW, et al. The impact of maternal body mass index on the phenotype of pre-eclampsia: a prospective cohort study. *Bjog*. 2012 Apr;119(5):589-95.

163. Anderson NH, Sadler LC, Stewart AW, Fyfe EM, McCowan LM. Ethnicity, body mass index and risk of pre-eclampsia in a multiethnic New Zealand population. *The Australian & New Zealand journal of obstetrics & gynaecology*. 2012 Dec;52(6):552-8.

164. Anderson NH, Sadler LC, Stewart AW, Fyfe EM, McCowan LM. Independent risk factors for infants who are small for gestational age by customised birthweight centiles in a multi-ethnic New Zealand population. *The Australian & New Zealand journal of obstetrics & gynaecology*. 2013 Apr;53(2):136-42.

165. Anderson SB, Lin SN, Reiss J, Skupski D, Grunebaum A. Peripartum thromboprophylaxis before and after implementation of a uniform heparin protocol. *Journal of Perinatal Medicine*. 2014

March;42(2):219-23.

166. Andersson T, Bergstrom S, Hogberg U. Swedish maternal mortality in the 19th century by different definitions: Previous stillbirths but not multiparity risk factor for maternal death. *Acta Obstetrica et Gynecologica Scandinavica*. 2000;79(8):679-86.

167. Andraweera PH, Dekker GA, Thompson SD, North RA, McCowan LM, Roberts CT. A functional variant in ANGPT1 and the risk of pregnancies with hypertensive disorders and small-for-gestational-age infants. *Mol Hum Reprod*. 2012 Jun;18(6):325-32.

168. Andraweera PH, Dekker GA, Thompson SD, Nowak RC, Zhang JV, McCowan LM, et al. Association of vascular endothelial growth factor +936 C/T single-nucleotide polymorphism with pregnancies complicated by small-for-gestational-age babies. *Archives of pediatrics & adolescent medicine*. 2011 Dec;165(12):1123-30.

169. Andraweera PH, Dekker GA, Thompson SD, Roberts CT. Single-nucleotide polymorphisms in the KDR gene in pregnancies complicated by gestational hypertensive disorders and small-for-gestational-age infants. *Reprod Sci*. 2012 May;19(5):547-54.

170. Andreas M, Zeisler H, Handisurya A, Franz MB, Gottsauner-Wolf M, Wolzt M, et al. N-terminal-pro-brain natriuretic peptide is decreased in insulin dependent gestational diabetes mellitus: a prospective cohort trial. *Cardiovasc Diabetol*. 2011;10:28.

171. Andrews WW, Goldenberg RL, Faye-Petersen O, Cliver S, Goepfert AR, Hauth JC. The Alabama Preterm Birth study: polymorphonuclear and mononuclear cell placental infiltrations, other markers of inflammation, and outcomes in 23- to 32-week preterm newborn infants. *Am J Obstet Gynecol*. 2006 Sep;195(3):803-8.

172. Andrietti S, Kruse AJ, Bekkers SC, Sep S, Spaanderman M, Peeters LL. Cardiac adaptation to pregnancy in women with a history of preeclampsia and a subnormal plasma volume. *Reprod Sci*. 2008 Dec;15(10):1059-65.

173. Androutopoulos G, Gkogkos P, Decavalas G. Mid-trimester maternal serum hCG and alpha fetal protein levels: Clinical significance and prediction of adverse pregnancy outcome. *International Journal of Endocrinology and Metabolism*. 2013;11(2):102-6.

174. Anfinan N, Sait K, Sait H. Gestational trophoblastic disease in the western region of Saudi Arabia (single-institute experience). *European Journal of Obstetrics Gynecology and Reproductive Biology*. 2015;180(1):8-11.

175. Angeli E, Verdecchia P, Narducci P, Angeli F. Additive value of standard ECG for the risk prediction of hypertensive disorders during pregnancy. *Hypertension research : official journal of the Japanese Society of Hypertension*. 2011 Jun;34(6):707-13.

176. Anim-Nyame N, Sooranna SR, Johnson MR, Gamble J, Steer PJ. A longitudinal study of resting peripheral blood flow in normal pregnancy and pregnancies complicated by chronic hypertension and pre-eclampsia. *Cardiovasc Res*. 2001 Jun;50(3):603-9.

177. Anim-Nyame N, Sooranna SR, Steer PJ, Johnson MR. Longitudinal analysis of maternal plasma leptin concentrations during normal pregnancy and pre-eclampsia. *Human reproduction*. 2000;15(9):2033-6.

178. Annagur BB, Tazegul A, Gunduz S. Do psychiatric disorders continue during pregnancy in women with hyperemesis gravidarum: A prospective study. *General Hospital Psychiatry*. 2013 September;35(5):492-6.

179. Ansari MR, Laghari MS, Solangi KB. Acute renal failure in pregnancy: one year observational study at Liaquat University Hospital, Hyderabad. *JPMA The Journal of the Pakistan Medical Association*. 2008 Feb;58(2):61-4.

180. Anton L, Olarerin-George AO, Schwartz N, Srinivas S, Bastek J, Hogenesch JB, et al. miR-210 inhibits trophoblast invasion and is a serum biomarker for preeclampsia. *The American journal of pathology*. 2013 Nov;183(5):1437-45.

181. Antonios TFT, Nama V, Wang D, Manyonda IT. Microvascular remodelling in preeclampsia: Quantifying capillary rarefaction accurately and independently predicts preeclampsia. *American journal of hypertension*. 2013 September;26(9):1162-9.
182. Antony KM, Agrawal A, Arndt ME, Murphy AM, Alapat PM, Guntupalli KK, et al. Association of adverse perinatal outcomes with screening measures of obstructive sleep apnea. *Journal of perinatology : official journal of the California Perinatal Association*. 2014 Jun;34(6):441-8.
183. Anumba DO, Lincoln K, Robson SC. Predictive value of clinical and laboratory indices at first assessment in women referred with suspected gestational hypertension. *Hypertension in pregnancy*. 2010 Jan;29(2):163-79.
184. Anwari JS, Butt AA, Al-Dar MA. Obstetric admissions to the intensive care unit. *Saudi medical journal*. 2004 Oct;25(10):1394-9.
185. Apantaku O, Chandrasekaran I, Bentick B. Obstetric outcome of singleton pregnancies achieved with in vitro fertilisation and intracytoplasmic sperm injection: Experience from a district general hospital. *Journal of Obstetrics and Gynaecology*. 2008 May;28(4):398-402.
186. Appenzeller S, Yeh S, Maruyama M, Barros SM, De Carvalho JF. Chorea in primary antiphospholipid syndrome is associated with rheumatic fever. *Rheumatology International*. 2012 September;32(9):2857-61.
187. Aquilina J, Barnett A, Thompson O, Harrington K. Comprehensive analysis of uterine artery flow velocity waveforms for the prediction of pre-eclampsia. *Ultrasound Obstet Gynecol*. 2000 Aug;16(2):163-70.
188. Aquilina J, Maplethorpe R, Ellis P, Harrington K. Correlation between second trimester maternal serum inhibin-A and human chorionic gonadotrophin for the prediction of pre-eclampsia. *Placenta*. 2000;21(5-6):487-92.
189. Arab K, Oddy L, Patenaude V, Abenheim HA. Obstetrical and neonatal outcomes in renal transplant recipients. *Journal of Maternal-Fetal and Neonatal Medicine*. 2015 01 Jan;28(2):162-7.
190. Aranas RM, Prabhakaran S, Lee VH. Posterior reversible encephalopathy syndrome associated with hemorrhage. *Neurocrit Care*. 2009;10(3):306-12.
191. Araujo AC, Leao MD, Nobrega MH, Bezerra PF, Pereira FV, Dantas EM, et al. Characteristics and treatment of hepatic rupture caused by HELLP syndrome. *Am J Obstet Gynecol*. 2006 Jul;195(1):129-33.
192. Arcangeli T, Giorgetta F, Farina A, De Musso F, Bellussi F, Salsi G, et al. Significance of uteroplacental Doppler at midtrimester in patients with favourable obstetric history. *The journal of maternal-fetal & neonatal medicine : the official journal of the European Association of Perinatal Medicine, the Federation of Asia and Oceania Perinatal Societies, the International Society of Perinatal Obstet*. 2013 Feb;26(3):299-302.
193. Ardawi MSM, Nasrat HA, Rouzi AA, Mustafa BE. Are women at an increased risk of gestational thyrotoxicosis? *Saudi medical journal*. 2002;23(6):651-7.
194. Aref S, Goda H, Abdelaal E. Circulating vascular growth factor (VEGF) angiopoietin-1 (Angi-1) and soluble tie-2 receptor in pregnancy complicated with pre-eclampsia: A prospective study. *Journal of Obstetrics and Gynecology of India*. 2013;63(5):316-20.
195. Areia A, Galvao A, Pais MS, Freitas L, Moura P. Outcome of pregnancy in renal allograft recipients. *Arch Gynecol Obstet*. 2009 Mar;279(3):273-7.
196. Aris A. A 12-year cohort study on adverse pregnancy outcomes in Eastern Townships of Canada: impact of endometriosis. *Gynecological endocrinology : the official journal of the International Society of Gynecological Endocrinology*. 2014 Jan;30(1):34-7.
197. Arnon SS, Schechter R, Maslanka SE, Jewell NP, Hatheway CL. Human botulism immune globulin for the treatment of infant botulism. *N Engl J Med*. 2006 Feb 2;354(5):462-71.
198. Arora CP, Kacerovsky M, Zinner B, Ertl T, Ceausu I, Rusnak I, et al. Disparities and relative risk ratio of preterm birth in six Central and Eastern European centers. *Croatian Medical Journal*.

2015;56(2):119-27.

199. Asemi Z, Jazayeri S, Najafi M, Samimi M, Mofid V, Shidfar F, et al. Effects of daily consumption of probiotic yoghurt on inflammatory factors in pregnant women: a randomized controlled trial. *Pakistan journal of biological sciences : PJBS*. 2011 Apr 15;14(8):476-82.
200. Asghar S, Naz U, Awan F, Awan A. Obstetric outcome of iron deficiency anemia. *Pakistan Journal of Medical and Health Sciences*. 2011 April-June;5(2):303-6.
201. Ashoor G, Maiz N, Rotas M, Kametas NA, Nicolaides KH. Maternal thyroid function at 11 to 13 weeks of gestation and subsequent development of preeclampsia. *Prenatal diagnosis*. 2010 Nov;30(11):1032-8.
202. Askenazi DJ, Koralkar R, Hundley HE, Montesanti A, Patil N, Ambalavanan N. Fluid overload and mortality are associated with acute kidney injury in sick near-term/term neonate. *Pediatr Nephrol*. 2013 Apr;28(4):661-6.
203. Aslan H, Gul A, Cebeci A. Neonatal outcome in pregnancies after preterm delivery for HELLP syndrome. *Gynecol Obstet Invest*. 2004;58(2):96-9.
204. Asma S, Kozanoglu I, Tarim E, Sariturk C, Gerekliloglu C, Akdeniz A, et al. Prophylactic red blood cell exchange may be beneficial in the management of sickle cell disease in pregnancy. *Transfusion*. 2015 Jan;55(1):36-44.
205. Asnafi N, Hajian K. Mid-trimester uterine artery Doppler ultrasound as a predictor of adverse obstetric outcome in high-risk pregnancy. *Taiwanese journal of obstetrics & gynecology*. 2011 Mar;50(1):29-32.
206. Assarag B, Dujardin B, Delamou A, Meski FZ, De Brouwere V. Determinants of maternal near-miss in morocco: Too late, too far, too sloppy? *PloS one*. 2015 22 Jan;10(1).
207. Asvold BO, Eskild A, Vatten LJ. Human chorionic gonadotropin, angiogenic factors, and preeclampsia risk: A nested case-control study. *Acta Obstetrica et Gynecologica Scandinavica*. 2014 May;93(5):454-62.
208. Asvold BO, Vatten LJ, Tanbo TG, Eskild A. Concentrations of human chorionic gonadotrophin in very early pregnancy and subsequent pre-eclampsia: a cohort study. *Human reproduction*. 2014 Jun;29(6):1153-60.
209. Asvold OB, Vatten LJ, Romundstad PR, Jenum PA, Karumanchi SA, Anne E. Original contribution: Angiogenic factors in maternal circulation and the risk of severe fetal growth restriction. *American journal of epidemiology*. 2011 15 Mar;173(6):630-9.
210. Atalay MA, Ozerkan K, Karkucak M, Yakut T, Atik Y, Develioglu OH. Polymorphisms in angiotensin-converting enzyme and glutathione s-transferase genes in Turkish population and risk for preeclampsia. *Clinical and Experimental Obstetrics and Gynecology*. 2012;39(4):466-9.
211. Atamer Y, Kocyigit Y, Yokus B, Atamer A, Erden AC. Lipid peroxidation, antioxidant defense, status of trace metals and leptin levels in preeclampsia. *European Journal of Obstetrics Gynecology and Reproductive Biology*. 2005 01 Mar;119(1):60-6.
212. Athanasiadis AP, Mikos T, Tambakoudis GP, Theodoridis TD, Papastergiou M, Assimakopoulos E, et al. Neurodevelopmental fetal assessment using KANET scoring system in low and high risk pregnancies. *The journal of maternal-fetal & neonatal medicine : the official journal of the European Association of Perinatal Medicine, the Federation of Asia and Oceania Perinatal Societies, the International Society of Perinatal Obstet*. 2013 Mar;26(4):363-8.
213. Atiba AS, Abbiyesuku FM, Niran-atiba TA, Oparinde DP, Ajose OA, Akindede RA. Free radical attack on membrane lipid and antioxidant vitamins in the course of pre-eclamptic pregnancy. *Ethiopian journal of health sciences*. 2014 Jan;24(1):35-42.
214. Audibert F, Benchimol Y, Benattar C, Champagne C, Frydman R. Prediction of preeclampsia or intrauterine growth restriction by second trimester serum screening and uterine Doppler velocimetry. *Fetal Diagn Ther*. 2005 Jan-Feb;20(1):48-53.

215. Auger N, Le TU, Park AL, Luo ZC. Association between maternal comorbidity and preterm birth by severity and clinical subtype: retrospective cohort study. *BMC pregnancy and childbirth*. 2011;11:67.
216. August P, Helseth G, Cook EF, Sison C. A prediction model for superimposed preeclampsia in women with chronic hypertension during pregnancy. *Am J Obstet Gynecol*. 2004 Nov;191(5):1666-72.
217. Aukes AM, De Groot JC, Wiegman MJ, Aarnoudse JG, Sanwikarja GS, Zeeman GG. Long-term cerebral imaging after pre-eclampsia. *Bjog*. 2012 Aug;119(9):1117-22.
218. Aune D, Saugstad OD, Henriksen T, Tonstad S. Physical activity and the risk of preeclampsia: a systematic review and meta-analysis. *Epidemiology (Cambridge, Mass)*. 2014 May;25(3):331-43.
219. Avagliano L, Bulfamante GP, Morabito A, Marconi AM. Abnormal spiral artery remodelling in the decidual segment during pregnancy: from histology to clinical correlation. *J Clin Pathol*. 2011 Dec;64(12):1064-8.
220. Avalos LA, Chen H, Li DK. Antidepressant medication use, depression, and the risk of preeclampsia. *CNS Spectrums*. 2015 13 Dec;20(1):39-47.
221. Avni B, Frenkel G, Shahar L, Golik A, Sherman D, Dishy V. Aortic stiffness in normal and hypertensive pregnancy. *Blood Pressure*. 2010;19(1):11-5.
222. Axt-Flidner R, Schwarze A, Nelles I, Altgassen C, Friedrich M, Schmidt W, et al. The value of uterine artery Doppler ultrasound in the prediction of severe complications in a risk population. *Arch Gynecol Obstet*. 2005 Jan;271(1):53-8.
223. Axt-Flidner R, Wrobel M, Hendrik HJ, Ertan AK, Mink D, Konig J, et al. Nucleated red blood cell count and doppler ultrasound in low- and high-risk pregnancies. *Clinical and experimental obstetrics & gynecology*. 2000;27(2):85-8.
224. Aya AG, Mangin R, Vialles N, Ferrer JM, Robert C, Ripart J, et al. Patients with severe preeclampsia experience less hypotension during spinal anesthesia for elective cesarean delivery than healthy parturients: a prospective cohort comparison. *Anesth Analg*. 2003 Sep;97(3):867-72.
225. Ayala DE, Hermida RC. Sex differences in the administration-time-dependent effects of low-dose aspirin on ambulatory blood pressure in hypertensive subjects. *Chronobiol Int*. 2010 Jan;27(2):345-62.
226. Ayala DE, Ucieda R, Hermida RC. Chronotherapy with low-dose aspirin for prevention of complications in pregnancy. *Chronobiol Int*. 2013 Mar;30(1-2):260-79.
227. Aydin C, Baloglu A, Yavuzcan A, Inci A. The effect of body mass index value during labor on pregnancy outcomes in Turkish population (obesity and pregnancy outcomes). *Arch Gynecol Obstet*. 2010 Jan;281(1):49-54.
228. Aydin NB, Gercekoglu H, Aksu B, Ozkul V, Sener T, Kiygil I, et al. Endotoxemia in coronary artery bypass surgery: a comparison of the off-pump technique and conventional cardiopulmonary bypass. *The Journal of thoracic and cardiovascular surgery*. 2003 Apr;125(4):843-8.
229. Aydin S, Ersan F, Ark C, Arioglu Aydin C. Partial HELLP syndrome: maternal, perinatal, subsequent pregnancy and long-term maternal outcomes. *The journal of obstetrics and gynaecology research*. 2014 Apr;40(4):932-40.
230. Aydin T, Varol FG, Sayin NC. Third trimester maternal plasma total fibronectin levels in pregnancy-induced hypertension: results of a tertiary center. *Clinical and applied thrombosis/hemostasis : official journal of the International Academy of Clinical and Applied Thrombosis/Hemostasis*. 2006 Jan;12(1):33-9.
231. Aykas F, Solak Y, Erden A, Bulut K, Dogan S, Sarli B, et al. Persistence of cardiovascular risk factors in women with previous preeclampsia: A long-term follow-up study. *Journal of Investigative Medicine*. 2015 04 Apr;63(4):641-5.
232. Aytac S, Turkay C, Kanbay M. *Helicobacter pylori* stool antigen assay in hyperemesis gravidarum: A risk factor for hyperemesis gravidarum or not? *Digestive Diseases and Sciences*. 2007 October;52(10):2840-3.
233. Ayyavoo A, Derraik JGB, Hofman PL, Biggs J, Bloomfield FH, Cormack BE, et al. Severe

hyperemesis gravidarum is associated with reduced insulin sensitivity in the offspring in childhood. *Journal of Clinical Endocrinology and Metabolism*. 2013 August;98(8):3263-8.

234. Aziz N, Kumar S. Clinical symptoms and laboratory parameters do not predict adverse maternal and fetal outcomes in HELLP. *Pregnancy Hypertension*. 2011 April;1(2):132-6.

235. Aziz S, Soomro N. Twin births and their complications in women of low socioeconomic profile. *Journal of the Pakistan Medical Association*. 2012 November;62(11):1204-8.

236. Azizieh FY, Raghupathy RG. Tumor necrosis factor-alpha and pregnancy complications: A prospective study. *Medical Principles and Practice*. 2015 25 Dec;24(2):165-70.

237. Azzam HA, Abousamra NK, Goda H, El-Shouky R, El-Gilany AH. The expression and concentration of CD40 ligand in normal pregnancy, preeclampsia, and hemolytic anemia, elevated liver enzymes and low platelet count (HELLP) syndrome. *Blood coagulation & fibrinolysis : an international journal in haemostasis and thrombosis*. 2013 Jan;24(1):71-5.

238. Bachur R. Pediatric urinary tract infection. *Clinical Pediatric Emergency Medicine*. 2004 March;5(1):28-36.

239. Badawy AM, Khiary M, Sherif LS, Hassan M, Ragab A, Abdelall I. Low-molecular weight heparin in patients with recurrent early miscarriages of unknown aetiology. *Journal of obstetrics and gynaecology : the journal of the Institute of Obstetrics and Gynaecology*. 2008 Apr;28(3):280-4.

240. Badria LF, Amarin ZO. Does consanguinity affect the severity of pre-eclampsia? *Arch Gynecol Obstet*. 2003 Jun;268(2):117-20.

241. Badria LF, Amarin ZO. Pre-eclampsia: is it a different disease in primiparous and multiparous women? *Arch Gynecol Obstet*. 2005 Nov;273(1):26-31.

242. Baer RJ, Currier RJ, Norton ME, Flessel MC, Goldman S, Towner D, et al. Obstetric, perinatal, and fetal outcomes in pregnancies with false-positive integrated screening results. *Obstet Gynecol*. 2014 Mar;123(3):603-9.

243. Baeten JM, Bukusi EA, Lambe M. Pregnancy complications and outcomes among overweight and obese nulliparous women. *American journal of public health*. 2001 Mar;91(3):436-40.

244. Baffero GM, Somigliana E, Crovetto F, Paffoni A, Persico N, Gueneri S, et al. Confined placental mosaicism at chorionic villous sampling: risk factors and pregnancy outcome. *Prenatal diagnosis*. 2012 Nov;32(11):1102-8.

245. Bagga R, Aggarwal N, Chopra V, Saha SC, Prasad GR, Dhaliwal LK. Pregnancy complicated by severe chronic hypertension: a 10-year analysis from a developing country. *Hypertension in pregnancy*. 2007;26(2):139-49.

246. Baggley A, Navioz Y, Maltepe C, Koren G, Einarson A. Determinants of women's decision making on whether to treat nausea and vomiting of pregnancy pharmacologically. *Journal of Midwifery and Women's Health*. 2004 July/August;49(4):350-4.

247. Bahado-Singh RO, Akolekar R, Mandal R, Dong E, Xia J, Kruger M, et al. Metabolomics and first-trimester prediction of early-onset preeclampsia. *The journal of maternal-fetal & neonatal medicine : the official journal of the European Association of Perinatal Medicine, the Federation of Asia and Oceania Perinatal Societies, the International Society of Perinatal Obstet*. 2012 Oct;25(10):1840-7.

248. Bahasadri S, Kashanian M, Khosravi Z. Comparison of pregnancy outcome among nulliparas with and without microalbuminuria at the end of the second trimester. *International journal of gynaecology and obstetrics: the official organ of the International Federation of Gynaecology and Obstetrics*. 2011 Oct;115(1):34-6.

249. Bahser N, Godehardt E, Hess AP, Blume C. Examination of intrarenal resistance indices indicate the involvement of renal pathology as a significant diagnostic classifier of preeclampsia. *American journal of hypertension*. 2014;27(5):742-9.

250. Bais JM, Eskes M, Pel M, Bonsel GJ, Bleker OP. Postpartum haemorrhage in nulliparous women: Incidence and risk factors in low and high risk women: A Dutch population-based cohort study on

- standard (>500 ml) and severe (>1000 ml) postpartum haemorrhage. *European Journal of Obstetrics Gynecology and Reproductive Biology*. 2004 10 Aug;115(2):166-72.
251. Bais JMJ, Van der Borden DMR, Pel M, Bonsel GJ, Eskes M, Van der Slikke HJW, et al. Vaginal birth after caesarean section in a population with a low overall caesarean section rate. *European Journal of Obstetrics Gynecology and Reproductive Biology*. 2001;96(2):158-62.
252. Bajaj JS, Bhattacharjee J, Sarin SK. Coagulation profile and platelet function in patients with extrahepatic portal vein obstruction and non-cirrhotic portal fibrosis. *Journal of gastroenterology and hepatology*. 2001 Jun;16(6):641-6.
253. Bajaj JS, Heuman DM, Hylemon PB, Sanyal AJ, Puri P, Sterling RK, et al. Randomised clinical trial: *Lactobacillus GG* modulates gut microbiome, metabolome and endotoxemia in patients with cirrhosis. *Alimentary pharmacology & therapeutics*. 2014 May;39(10):1113-25.
254. Baker AM, Haeri S. Estimating risk factors for development of preeclampsia in teen mothers. *Arch Gynecol Obstet*. 2012 Nov;286(5):1093-6.
255. Baker AM, Haeri S, Camargo Jr CA, Espinola JA, Stuebe AM. A nested case-control study of midgestation vitamin D deficiency and risk of severe preeclampsia. *Journal of Clinical Endocrinology and Metabolism*. 2010 November;95(11):5105-9.
256. Baker AM, Klein RL, Haeri S, Moss KL, Boggess KA. Association of midgestational paraoxonase 1 activity with pregnancies complicated by preeclampsia. *American Journal of Perinatology*. 2010;27(3):205-10.
257. Bakhshaei M, Boskabadi H, Hassanzadeh M, Nourizadeh N, Ghassemi MM, Khazaeni K, et al. Hearing impairment in the neonate of preeclamptic women. *Otolaryngology - Head and Neck Surgery*. 2008 December;139(6):846-9.
258. Bakhti A, Vaiman D. Prevention of gravidic endothelial hypertension by aspirin treatment administered from the 8th week of gestation. *Hypertension research : official journal of the Japanese Society of Hypertension*. 2011 Oct;34(10):1116-20.
259. Bakker R, Steegers EA, Hofman A, Jaddoe VW. Blood pressure in different gestational trimesters, fetal growth, and the risk of adverse birth outcomes: the generation R study. *American journal of epidemiology*. 2011 Oct 1;174(7):797-806.
260. Bakker R, Steegers EA, Mackenbach JP, Hofman A, Jaddoe VW. Maternal smoking and blood pressure in different trimesters of pregnancy: the Generation R study. *J Hypertens*. 2010 Nov;28(11):2210-8.
261. Bakker R, Steegers EA, Raat H, Hofman A, Jaddoe VW. Maternal caffeine intake, blood pressure, and the risk of hypertensive complications during pregnancy. *The Generation R Study. American journal of hypertension*. 2011 Apr;24(4):421-8.
262. Bakker R, Steegers EAP, Hofman A, Jaddoe VW. Blood pressure in different gestational trimesters, fetal growth, and the risk of adverse birth outcomes. *American journal of epidemiology*. 2011 01 Oct;174(7):797-806.
263. Baksu A, Taskin M, Goker N, Baksu B, Uluocak A. Plasma homocysteine in late pregnancies complicated with preeclampsia and in newborns. *Am J Perinatol*. 2006 Jan;23(1):31-5.
264. Balat O, Aksoy F, Kutlar I, Ugur MG, Iyikosker H, Balat A, et al. Increased plasma levels of Urotensin-II in preeclampsia-eclampsia: a new mediator in pathogenesis? *European journal of obstetrics, gynecology, and reproductive biology*. 2005 May 1;120(1):33-8.
265. Balci A, Drenthen W, Mulder BJM, Roos-Hesselink JW, Voors AA, Vliegen HW, et al. Pregnancy in women with corrected tetralogy of Fallot: Occurrence and predictors of adverse events. *American Heart Journal*. 2011 February;161(2):307-13.
266. Baldwin KJ, Leighton NA, Kilby MD, Wyldes M, Churchill D, Johanson R, et al. The west midlands "severe hypertensive illness in pregnancy" (SHIP) audit. *Hypertension in pregnancy*. 2001;20(3):257-68.
267. Baldwin KJ, Leighton NA, Kilby MD, Wyldes M, Churchill D, Jones PW, et al. The 'Severe



Hypertensive Illness in Pregnancy' (SHIP) audit: promoting quality care using a high risk monitoring chart and eclampsia treatment pack. *Journal of obstetrics and gynaecology : the journal of the Institute of Obstetrics and Gynaecology*. 2002 Jul;22(4):346-52.

268. Ballard K, Gari L, Mosisa H, Wright J. Provision of individualised obstetric risk advice to increase health facility usage by women at risk of a complicated delivery: A cohort study of women in the rural highlands of West Ethiopia. *BJOG: An International Journal of Obstetrics and Gynaecology*. 2013 July;120(8):971-8.

269. Ballon JS, Dean KA, Cadenhead KS. Obstetrical complications in people at risk for developing schizophrenia. *Schizophrenia Research*. 2008 January;98(1-3):307-11.

270. Bamberg C, Diekmann F, Haase M, Budde K, Hocher B, Halle H, et al. Pregnancy on intensified hemodialysis: fetal surveillance and perinatal outcome. *Fetal Diagn Ther*. 2007;22(4):289-93.

271. Bandeira ARAP, Rezende CAL, Reis ZSN, Barbosa AR, Peret FJA, Cabral ACV. Epidemiologic profile, survival, and maternal prognosis factors among women at an obstetric intensive care unit. *International Journal of Gynecology and Obstetrics*. 2014 January;124(1):63-6.

272. Bandoli G, Lindsay S, Johnson DL, Kao K, Luo Y, Chambers CD. Change in paternity and select perinatal outcomes: causal or confounded? *Journal of obstetrics and gynaecology : the journal of the Institute of Obstetrics and Gynaecology*. 2012 Oct;32(7):657-62.

273. Bangal Vidyadhar B, Giri Purushottam A, Gavhane Satyajit P, Sai B. Grim face of maternal mortality at tertiary care hospital of rural India: A 16 years study. *Indian Journal of Public Health Research and Development*. 2013 October-December;4(4):197-201.

274. Banhidy F, Acs N, Horvath-Puho E, Czeizel AE. Pregnancy complications and delivery outcomes in pregnant women with severe migraine. *European journal of obstetrics, gynecology, and reproductive biology*. 2007 Oct;134(2):157-63.

275. Banhidy F, Acs N, Puho EH, Czeizel AE. Pregnancy complications and birth outcomes of pregnant women with urinary tract infections and related drug treatments. *Scandinavian journal of infectious diseases*. 2007;39(5):390-7.

276. Banhidy F, Acs N, Puho EH, Czeizel AE. Hypotension in pregnant women: a population-based case-control study of pregnancy complications and birth outcomes. *Hypertension research : official journal of the Japanese Society of Hypertension*. 2011 Jan;34(1):55-61.

277. Banzola I, Farina A, Concu M, Sekizawa A, Purwosunu Y, Strada I, et al. Performance of a panel of maternal serum markers in predicting preeclampsia at 11-15 weeks' gestation. *Prenatal diagnosis*. 2007 Nov;27(11):1005-10.

278. Bar J, Bardin R, Chen R, Pardo J, Hod M, Peled Y, et al. Surface expression of neutrophil adhesion molecules in pregnant women at risk for hypertensive complications. *Hypertension in pregnancy*. 2003;22(2):165-72.

279. Bar J, Harell D, Bardin R, Pardo J, Chen R, Hod M, et al. The elevated plasma lipoprotein(a) concentrations in preeclampsia do not precede the development of the disorder. *Thromb Res*. 2002 Jan 1;105(1):19-23.

280. Barkat-Masih M, Saha C, Hamby DK, Ofner S, Golomb MR. Feeding problems in children with neonatal arterial ischemic stroke. *Journal of Child Neurology*. 2010 July;25(7):867-72.

281. Barkehall-Thomas A, Tong S, Baker LS, Edwards A, Wallace EM. Maternal serum activin A and the prediction of intrauterine growth restriction. *Australian and New Zealand Journal of Obstetrics and Gynaecology*. 2006 April;46(2):97-101.

282. Barkehall-Thomas A, Wilson C, Baker L, ni Bhuinneain M, Wallace EM. Uterine artery Doppler velocimetry for the detection of adverse obstetric outcomes in patients with elevated mid-trimester beta-human chorionic gonadotrophin. *Acta Obstet Gynecol Scand*. 2005 Aug;84(8):743-7.

283. Barker ED, McAuliffe FM, Alderdice F, Unterscheider J, Daly S, Geary MP, et al. The role of growth trajectories in classifying fetal growth restriction. *Obstet Gynecol*. 2013 Aug;122(2 Pt 1):248-54.

284. Baron J, Weintraub AY, Eshkoli T, Hershkovitz R, Sheiner E. The consequences of previous uterine scar dehiscence and cesarean delivery on subsequent births. *International Journal of Gynecology and Obstetrics*. 2014;126(2):120-2.
285. Barquiel B, Herranz L, Grande C, Castro-Dufourny I, Llaro M, Parra P, et al. Body weight, weight gain and hyperglycaemia are associated with hypertensive disorders of pregnancy in women with gestational diabetes. *Diabetes & metabolism*. 2014 Jun;40(3):204-10.
286. Barrett HL, Nitert Dekker M, Lust K, Fagermo N, Wolski P, Callaway LK. The conundrum of eclampsia and fitness to drive. *Australian and New Zealand Journal of Obstetrics and Gynaecology*. 2013 December;53(6):540-3.
287. Barrilleaux PS, Magann EF, Chauhan SP, York BM, Philibert L, Lewis DF. Amniotic fluid index as a predictor of adverse perinatal outcome in the HELLP syndrome. *The Journal of reproductive medicine*. 2007 Apr;52(4):293-8.
288. Bartynski WS, Boardman JF, Zeigler ZR, Shadduck RK, Lister J. Posterior reversible encephalopathy syndrome in infection, sepsis, and shock. *American Journal of Neuroradiology*. 2006 November/December;27(10):2179-90.
289. Basaran A, Basaran M, Topatan B. Chorionic villus sampling and the risk of preeclampsia: A systematic review and meta-analysis. *Archives of Gynecology and Obstetrics*. 2011 June;283(6):1175-81.
290. Basbug M, Demir I, Serin IS, Ozcelik B, Saraymen R, Narin F, et al. Maternal erythrocyte malondialdehyde level in preeclampsia prediction: a longitudinal study. *J Perinat Med*. 2003;31(6):469-74.
291. Baschat AA, Magder LS, Doyle LE, Atlas RO, Jenkins CB, Blitzer MG. Prediction of preeclampsia utilizing the first trimester screening examination. *Am J Obstet Gynecol*. 2014 Nov;211(5):514.e1-7.
292. Basha SL, Rochon ML, Quiones JN, Coassolo KM, Rust OA, Smulian JC. Randomized controlled trial of wound complication rates of subcuticular suture vs staples for skin closure at cesarean delivery. *American Journal of Obstetrics and Gynecology*. 2010 September;203(3):285.e1-.e8.
293. Bashiri A, Lazer T, Burstein E, Smolin A, Lazer S, Perry ZH, et al. Maternal and neonatal outcome following cerebrovascular accidents during pregnancy. *The journal of maternal-fetal & neonatal medicine : the official journal of the European Association of Perinatal Medicine, the Federation of Asia and Oceania Perinatal Societies, the International Society of Perinatal Obstet*. 2007 Mar;20(3):241-7.
294. Bashiri A, Smolin A, Sheiner E, Zelingher J, Mazor M. Maternal rehospitalization after singleton term vaginal delivery. *The journal of maternal-fetal & neonatal medicine : the official journal of the European Association of Perinatal Medicine, the Federation of Asia and Oceania Perinatal Societies, the International Society of Perinatal Obstet*. 2003 Nov;14(5):344-8.
295. Bashiri A, Zmora E, Sheiner E, Hershkovitz R, Shoham-Vardi I, Mazor M. Maternal hypertensive disorders are an independent risk factor for the development of necrotizing enterocolitis in very low birth weight infants. *Fetal Diagn Ther*. 2003 Nov-Dec;18(6):404-7.
296. Bassaw B, Roopnarinesingh S, Sirjusingh A. An audit of perinatal mortality. *West Indian Med J*. 2001 Mar;50(1):42-6.
297. Basso O, Christensen K, Olsen J. Higher risk of pre-eclampsia after change of partner. An effect of longer interpregnancy intervals? *Epidemiology (Cambridge, Mass)*. 2001 Nov;12(6):624-9.
298. Basso O, Rasmussen S, Weinberg CR, Wilcox AJ, Irgens LM, Skjaerven R. Trends in fetal and infant survival following preeclampsia. *Jama*. 2006 Sep 20;296(11):1357-62.
299. Basso O, Weinberg CR, Baird DD, Wilcox AJ, Olsen J. Subfecundity as a correlate of preeclampsia: a study within the Danish National Birth Cohort. *American journal of epidemiology*. 2003 Feb 1;157(3):195-202.
300. Basso O, Wilcox AJ, Weinberg CR, Baird DD, Olsen J. Height and risk of severe pre-eclampsia. A study within the Danish National Birth Cohort. *International journal of epidemiology*. 2004 August;33(4):858-63.

301. Baste V, Moen BE, Oftedal G, Strand LA, Bjorge L, Mild KH. Pregnancy outcomes after paternal radiofrequency field exposure aboard fast patrol boats. *Journal of Occupational and Environmental Medicine*. 2012 April;54(4):431-8.
302. Bastek JA, Pare E, Wang E, Elovitz MA, Srinivas SK. Limitations of ultrasound in diagnosing intrauterine growth restriction in severe preeclampsia. *The journal of maternal-fetal & neonatal medicine : the official journal of the European Association of Perinatal Medicine, the Federation of Asia and Oceania Perinatal Societies, the International Society of Perinatal Obstet*. 2009 Nov;22(11):1039-44.
303. Bastek JA, Srinivas SK, Sammel MD, Elovitz MA. Do neonatal outcomes differ depending on the cause of preterm birth? A comparison between spontaneous birth and iatrogenic delivery for preeclampsia. *Am J Perinatol*. 2010 Feb;27(2):163-9.
304. Basu A, Alaupovic P, Wu M, Jenkins AJ, Yu Y, Nankervis AJ, et al. Plasma lipoproteins and preeclampsia in women with type 1 diabetes: a prospective study. *The Journal of clinical endocrinology and metabolism*. 2012 May;97(5):1752-62.
305. Basu A, Yu JY, Jenkins AJ, Nankervis AJ, Hanssen KF, Henriksen T, et al. Trace elements as predictors of preeclampsia in type 1 diabetic pregnancy. *Nutrition Research*. 2015 01 May;35(5):421-30.
306. Basude S, Trinder J, Caputo M, Curtis SL. Pregnancy outcome and follow-up cardiac outcome in women with aortic valve replacement. *Obstetric Medicine*. 2014;7(1):29-33.
307. Bateman BT, Hernandez-Diaz S, Huybrechts KF, Palmsten K, Mogun H, Ecker JL, et al. Outpatient calcium-channel blockers and the risk of postpartum haemorrhage: A cohort study. *BJOG: An International Journal of Obstetrics and Gynaecology*. 2013 December;120(13):1668-76.
308. Bateman BT, Huybrechts KF, Fischer MA, Seely EW, Ecker JL, Oberg AS, et al. Chronic hypertension in pregnancy and the risk of congenital malformations: A cohort study. *American Journal of Obstetrics and Gynecology*. 2015 01 Mar;212(3):337.e1-.e14.
309. Battula N, Tsapralis D, Takhar A, Coldham C, Mayer D, Isaac J, et al. Aetio-pathogenesis and the management of spontaneous liver bleeding in the West: a 16-year single-centre experience. *HPB : the official journal of the International Hepato Pancreato Biliary Association*. 2012 Jun;14(6):382-9.
310. Baud O, Zupan V, Lacaze-Masmonteil T, Audibert F, Shojaei T, Thebaud B, et al. The relationships between antenatal management, the cause of delivery and neonatal outcome in a large cohort of very preterm singleton infants. *Bjog*. 2000 Jul;107(7):877-84.
311. Bauer M, Fast C, Haas J, Resch B, Lang U, Pertl B. Cystic periventricular leukomalacia in preterm infants: an analysis of obstetric risk factors. *Early Hum Dev*. 2009 Mar;85(3):163-9.
312. Bauer TM, Schwacha H, Steinbruckner B, Brinkmann FE, Ditzen AK, Aponte JJ, et al. Small intestinal bacterial overgrowth in human cirrhosis is associated with systemic endotoxemia. *Am J Gastroenterol*. 2002 Sep;97(9):2364-70.
313. Baum M, Schiff E, Kreiser D, Dennery PA, Stevenson DK, Rosenthal T, et al. End-tidal carbon monoxide measurements in women with pregnancy-induced hypertension and preeclampsia. *Am J Obstet Gynecol*. 2000 Oct;183(4):900-3.
314. Baumann M, Korner M, Huang X, Wenger F, Surbek D, Albrecht C. Placental ABCA1 and ABCG1 expression in gestational disease: Pre-eclampsia affects ABCA1 levels in syncytiotrophoblasts. *Placenta*. 2013 Nov;34(11):1079-86.
315. Bautista-Castano I, Henriquez-Sanchez P, Aleman-Perez N, Garcia-Salvador JJ, Gonzalez-Quesada A, Garcia-Hernandez JA, et al. Maternal obesity in early pregnancy and risk of adverse outcomes. *PLoS one*. 2013;8(11):e80410.
316. Baweja S, Kent A, Masterson R, Roberts S, McMahon LP. Prediction of pre-eclampsia in early pregnancy by estimating the spot urinary albumin: creatinine ratio using high-performance liquid chromatography. *Bjog*. 2011 Aug;118(9):1126-32.
317. Baxter JA, Roth DE, Al Mahmud A, Ahmed T, Islam M, Zlotkin SH. Tablets are preferred and more acceptable than powdered prenatal calcium supplements among pregnant women in Dhaka,

Bangladesh. *The Journal of nutrition*. 2014 Jul;144(7):1106-12.

318. Baylan MY, Kuyumcuoglu U, Kale A, Celik Y, Topcu I. Is preeclampsia a new risk factor for cochlear damage and hearing loss? *Otol Neurotol*. 2010 Oct;31(8):1180-3.
319. Bayoumeu F, Baka NE, Fresson J, Monnier-Barbarino P. Do prophylactic prostaglandins reduce the transfusion rate at cesarean section in high-order multiple pregnancies? *European journal of obstetrics, gynecology, and reproductive biology*. 2003 Nov 10;111(1):38-42.
320. Bayrampour H, Heaman M. Advanced maternal age and the risk of cesarean birth: a systematic review. *Birth*. 2010 Sep;37(3):219-26.
321. Beazley D, Ahokas R, Livingston J, Griggs M, Sibai BM. Vitamin C and E supplementation in women at high risk for preeclampsia: A double-blind, placebo-controlled trial. *American Journal of Obstetrics and Gynecology*. 2005 February;192(2):520-1.
322. Becker R. Identification of high-risk patients for adverse pregnancy outcome based on multivariate logistic regression analysis at 20-23 gestational weeks. *Journal of Perinatal Medicine*. 2011 01 Nov;39(6):667-72.
323. Becker R, Keller T, Kiesewetter H, Fangerau H, Bittner U. Individual risk assessment of adverse pregnancy outcome by multivariate regression analysis may serve as basis for drug intervention studies: retrospective analysis of 426 high-risk patients including ethical aspects. *Arch Gynecol Obstet*. 2013 Jul;288(1):41-8.
324. Becker S, Solomayer E, Dogan C, Wallwiener D, Fehm T. Meconium-stained amniotic fluid--perinatal outcome and obstetrical management in a low-risk suburban population. *European journal of obstetrics, gynecology, and reproductive biology*. 2007 May;132(1):46-50.
325. Becker S, Solomayer E, Dogan C, Wallwiener D, Fehm T. Meconium-stained amniotic fluid-Perinatal outcome and obstetrical management in a low-risk suburban population. *European Journal of Obstetrics Gynecology and Reproductive Biology*. 2007 May;132(1):46-50.
326. Becker T, Vermeulen MJ, Wyatt PR, Meier C, Ray JG. Maternal obesity and the risk of placental vascular disease. *Journal of obstetrics and gynaecology Canada : JOGC = Journal d'obstetrique et gynecologie du Canada : JOGC*. 2008 Dec;30(12):1132-6.
327. Begum MR, Begum A, Johanson R, Ali MN, Akhter S. A low dose ('Dhaka') magnesium sulphate regime for eclampsia: Clinical findings and serum magnesium levels. *Acta Obstetrica et Gynecologica Scandinavica*. 2001;80(11):998-1002.
328. Begum R, Begum A, Johanson R, Ali MN, Akhter S. A low dose ("Dhaka") magnesium sulphate regime for eclampsia. *Acta Obstet Gynecol Scand*. 2001 Nov;80(11):998-1002.
329. Begum S, Aziz un N, Begum I. Analysis of maternal mortality in a tertiary care hospital to determine causes and preventable factors. *J Ayub Med Coll Abbottabad*. 2003 Apr-Jun;15(2):49-52.
330. Behboudi-Gandevani S, Moghadam NA, Mogadam-Banaem L, Mohamadi B, Asghari M. Association of high-sensitivity C-reactive protein serum levels in early pregnancy with the severity of preeclampsia and fetal birth weight. *Journal of Perinatal Medicine*. 2012 November;40(6):601-5.
331. Behcet A, Esref A, Ozgur O, Abdullah A, Mustafa A. Pregnancy-related strokes in southeast Turkey. *Neurosciences*. 2007 July;12(3):207-14.
332. Beiner ME, Simchen MJ, Sivan E, Chetrit A, Kuint J, Schiff E. Risk factors for neonatal thrombocytopenia in preterm infants. *Am J Perinatol*. 2003 Jan;20(1):49-54.
333. Bekdas M, Demircioglu F, Kadi Z, Kismet E. Pregnancy outcome in women of advanced maternal age: A cross-sectional study in a Turkish maternity hospital. *Macedonian Journal of Medical Sciences*. 2014;6(4):365-9.
334. Belfort M, Allred J, Dildy G. Magnesium sulfate decreases cerebral perfusion pressure in preeclampsia. *Hypertension in pregnancy*. 2008;27(4):315-27.
335. Belfort MA, Tooke-Miller C, Allen JC, Jr., Varner MA, Grunewald C, Nisell H, et al. Pregnant women with chronic hypertension and superimposed pre-eclampsia have high cerebral perfusion

pressure. *Bjog*. 2001 Nov;108(11):1141-7.

336. Belfort MB, Gillman MW, McCormick MC. Prenatal and perinatal predictors of blood pressure at school age in former preterm, low birth weight infants. *Journal of perinatology : official journal of the California Perinatal Association*. 2012 Apr;32(4):265-9.

337. Bell AD, Roussin A, Cartier R, Chan WS, Douketis JD, Gupta A, et al. The use of antiplatelet therapy in the outpatient setting: Canadian cardiovascular society guidelines. *Canadian Journal of Cardiology*. 2011 May/June;27(3 SUPPL.1):S1-S59.

338. Bell JS, Campbell DM, Graham WJ, Penney GC, Ryan M, Hall MH. Can obstetric complications explain the high levels of obstetric interventions and maternity service use among older women? A retrospective analysis of routinely collected data. *British Journal of Obstetrics and Gynaecology*. 2001;108(9):910-8.

339. Bell R, Parker L, MacPhail S, Wright C. Trends in the cause of late fetal death, 1982-2000. *Bjog*. 2004 Dec;111(12):1400-7.

340. Bellamy L, Casas JP, Hingorani AD, Williams DJ. Pre-eclampsia and risk of cardiovascular disease and cancer in later life: systematic review and meta-analysis. *Bmj*. 2007 Nov 10;335(7627):974.

341. Bellet F, Beyens MN, Bernard N, Beghin D, Elefant E, Vial T. Exposure to aripiprazole during embryogenesis: A prospective multicenter cohort study. *Pharmacoepidemiology and Drug Safety*. 2015 01 Apr;24(4):368-80.

342. Bellomo G, Venanzi S, Saronio P, Verdura C, Narducci PL. Prognostic significance of serum uric acid in women with gestational hypertension. *Hypertension*. 2011 Oct;58(4):704-8.

343. Bellussi F, Contro E, Legnani C, Galletti S, Cosentino A, Rizzo N, et al. Obstetric implications of fetal inherited thrombophilia in thrombophilic women. *Pregnancy Hypertension*. 2014 January;4(1):54-8.

344. Belo L, Santos-Silva A, Caslake M, Cooney J, Pereira-Leite L, Quintanilha A, et al. Neutrophil activation and C-reactive protein concentration in preeclampsia. *Hypertension in pregnancy*. 2003;22(2):129-41.

345. Belo L, Santos-Silva A, Rumley A, Lowe G, Pereira-Leite L, Quintanilha A, et al. Elevated tissue plasminogen activator as a potential marker of endothelial dysfunction in pre-eclampsia: correlation with proteinuria. *Bjog*. 2002 Nov;109(11):1250-5.

346. Belogolovkin V, Crisan L, Lynch O, Weldeselasse H, August EM, Alio AP, et al. Neonatal outcomes of successful VBAC among obese and super-obese mothers. *Journal of Maternal-Fetal and Neonatal Medicine*. 2012 June;25(6):714-8.

347. Belogolovkin V, Eddleman KA, Malone FD, Sullivan L, Ball RH, Nyberg DA, et al. The effect of low body mass index on the development of gestational hypertension and preeclampsia. *The journal of maternal-fetal & neonatal medicine : the official journal of the European Association of Perinatal Medicine, the Federation of Asia and Oceania Perinatal Societies, the International Society of Perinatal Obstet*. 2007 Jul;20(7):509-13.

348. Belogolovkin V, Salihu HM, Weldeselasse H, Biroscak BJ, August EM, Mbah AK, et al. Impact of prior bariatric surgery on maternal and fetal outcomes among obese and non-obese mothers. *Arch Gynecol Obstet*. 2012 May;285(5):1211-8.

349. Belva F, Painter RC, Schiettecatte J, Bonduelle M, Roelants M, Roseboom TJ, et al. Gender-specific alterations in salivary cortisol levels in pubertal intracytoplasmic sperm injection offspring. *Hormone Research in Paediatrics*. 2013;80(5):350-5.

350. Benaglia L, Bermejo A, Somigliana E, Scarduelli C, Ragni G, Fedele L, et al. Pregnancy outcome in women with endometriomas achieving pregnancy through IVF. *Human reproduction*. 2012 June;27(6):1663-7.

351. Ben-Ami S, Oron G, Ben-Haroush A, Blickstein D, Hod M, Bar J. Primary atherothrombotic occlusive vascular events in premenopausal women with history of adverse pregnancy outcome.

Thromb Res. 2010 Feb;125(2):124-7.

352. Benecke C, Siebert TI, Kruger TF, Grove D. Antepartum and intrapartum complications in grandmultiparous patients compared with multiparous patients at Tygerberg Hospital. *South African Journal of Obstetrics and Gynaecology*. 2005 February;11(1):14-6.

353. Bener A, Al-Hamaq AO, Saleh NM. Association between vitamin d insufficiency and adverse pregnancy outcome: Global comparisons. *International Journal of Women's Health*. 2013 03 Sep;5(1):523-31.

354. Bener A, Saleh NM, Al-Hamaq A. Prevalence of gestational diabetes and associated maternal and neonatal complications in a fast-developing community: Global comparisons. *International Journal of Women's Health*. 2011;3(1):367-73.

355. Beneventi F, Locatelli E, Ramoni V, Caporali R, Montecucco CM, Simonetta M, et al. Uterine artery Doppler velocimetry and obstetric outcomes in connective tissue diseases diagnosed during the first trimester of pregnancy. *Prenatal diagnosis*. 2012 November;32(11):1094-101.

356. Bengtson MB, Solberg IC, Aamodt G, Johnsen J, Mourn B, Vatn MH. Relationships between inflammatory bowel disease and perinatal factors: Both maternal and paternal disease are related to preterm birth of offspring. *Inflammatory Bowel Diseases*. 2010;16(5):847-55.

357. Benhalima K, Hanssens M, Devlieger R, Verhaeghe J, Mathieu C. Analysis of pregnancy outcomes using the new IADPSG recommendation compared with the carpenter and coustan criteria in an area with a low prevalence of gestational diabetes. *International Journal of Endocrinology*. 2013;2013(248121).

358. Ben-Haroush A, Bardin R, Erman A, Hod M, Chen R, Kaplan B, et al. Beta2-microglobulin and hypertensive complications in pregnant women at risk. *Clin Nephrol*. 2002 Dec;58(6):411-6.

359. Ben-Haroush A, Harell D, Hod M, Bardin R, Kaplan B, Orvieto R, et al. Plasma levels of vitamin E in pregnant women prior to the development of preeclampsia and other hypertensive complications. *Gynecol Obstet Invest*. 2002;54(1):26-30.

360. Ben-Haroush A, Yogev Y, Glickman H, Kaplan B, Hod M, Bar J. Mode of delivery in pregnant women with hypertensive disorders and unfavorable cervix following induction of labor with vaginal application of prostaglandin E2. *Acta Obstetrica et Gynecologica Scandinavica*. 2005 July;84(7):665-71.

361. Bennett WL, Chang HY, Levine DM, Wang L, Neale D, Werner EF, et al. Utilization of primary and obstetric care after medically complicated pregnancies: an analysis of medical claims data. *J Gen Intern Med*. 2014 Apr;29(4):636-45.

362. Bennett WL, Gilson MM, Jamshidi R, Burke AE, Segal JB, Steele KE, et al. Impact of bariatric surgery on hypertensive disorders in pregnancy: retrospective analysis of insurance claims data. *Bmj*. 2010;340:c1662.

363. Bentata Y, Housni B, Mimouni A, Azzouzi A, Abouqal R. Acute kidney injury related to pregnancy in developing countries: etiology and risk factors in an intensive care unit. *J Nephrol*. 2012 Sep-Oct;25(5):764-75.

364. Bentley-Lewis R, Powe C, Ankers E, Wenger J, Ecker J, Thadhani R. Effect of race/ethnicity on hypertension risk subsequent to gestational diabetes mellitus. *The American journal of cardiology*. 2014 Apr 15;113(8):1364-70.

365. Bera E. Maternal outcomes following introduction of antiretroviral therapy in the public sector: A prospective study at a tertiary hospital in the Eastern Cape. *South African Journal of Obstetrics and Gynaecology*. 2009;15(1):26-33.

366. Berdahl DM, Blaine J, Van Voorhis B, Dokras A. Detection of enlarged yolk sac on early ultrasound is associated with adverse pregnancy outcomes. *Fertility and sterility*. 2010 September;94(4):1535-7.

367. Bereketoglu C, Kasap M, Pazarbasi A. Studies on angiotensin-converting enzyme insertion/deletion polymorphism and genotype distributions in Turkish preeclampsia patients. *J*

Pregnancy. 2012;2012:108206.

368. Berends AL, De Groot CJM, Sijbrands EJ, Sie MPS, Benneheij SH, Pal R, et al. Shared constitutional risks for maternal vascular-related pregnancy complications and future cardiovascular disease. *Hypertension*. 2008 April;51(4 PART 2 SUPPL.):1034-41.
369. Berends AL, Zillikens MC, de Groot CJ, Rivadeneira F, Oostra BA, van Duijn CM, et al. Body composition by dual-energy X-ray absorptiometry in women with previous pre-eclampsia or small-for-gestational-age offspring. *Bjog*. 2009 Feb;116(3):442-51.
370. Berg CJ, Mackay AP, Qin C, Callaghan WM. Overview of maternal morbidity during hospitalization for labor and delivery in the United States: 1993-1997 and 2001-2005. *Obstet Gynecol*. 2009 May;113(5):1075-81.
371. Bergen NE, Jaddoe VW, Timmermans S, Hofman A, Lindemans J, Russcher H, et al. Homocysteine and folate concentrations in early pregnancy and the risk of adverse pregnancy outcomes: the Generation R Study. *Bjog*. 2012 May;119(6):739-51.
372. Berggren EK, Boggess KA, Jonsson Funk M. Population health: Modest glycaemic improvements in a pregnant cohort with mild glucose intolerance decreased adverse outcomes. *Paediatric and perinatal epidemiology*. 2014 July;28(4):280-6.
373. Berggren EK, Boggess KA, Stuebe AM, Jonsson Funk M. National Diabetes Data Group vs Carpenter-Coustan criteria to diagnose gestational diabetes. *Am J Obstet Gynecol*. 2011 Sep;205(3):253.e1-7.
374. Bergh C, Wennerholm UB. Obstetric outcome and long-term follow up of children conceived through assisted reproduction. *Best Practice and Research: Clinical Obstetrics and Gynaecology*. 2012 December;26(6):841-52.
375. Berlac JF, Skovlund CW, Lidegaard O. Obstetrical and neonatal outcomes in women following gastric bypass: a Danish national cohort study. *Acta Obstet Gynecol Scand*. 2014 May;93(5):447-53.
376. Berlit S, Welzel G, Tuschy B, Nickol J, Hornemann A, Sutterlin M, et al. Emergency caesarean section: Risk factors for adverse neonatal outcome. *Archives of Gynecology and Obstetrics*. 2013 May;287(5):901-5.
377. Berman S, Richardson DK, Cohen AP, Pursley DM, Lieberman E. Relationship of race and severity of neonatal illness. *Am J Obstet Gynecol*. 2001 Mar;184(4):668-72.
378. Bermingham J, Jenkins D, McCarthy T, O'Brien M. Genetic analysis of insulin-like growth factor II and HLA-G in pre-eclampsia. *Biochemical Society transactions*. 2000 Feb;28(2):215-9.
379. Bersinger NA, Odegard RA. Serum levels of macrophage colony stimulating, vascular endothelial, and placenta growth factor in relation to later clinical onset of pre-eclampsia and a small-for-gestational age birth. *American Journal of Reproductive Immunology*. 2005 August;54(2):77-83.
380. Bertozzi S, Londero AP, Salvador S, Grassi T, Fruscalzo A, Driul L, et al. Influence of the couple on hypertensive disorders during pregnancy: A retrospective cohort study. *Pregnancy Hypertension*. 2011 April;1(2):156-63.
381. Best LG, Dorsam ST, Nadeau M, Burd L, Anderson CM. Genetic thrombophilia variants and risk for preeclampsia among American Indians. *Hypertension in pregnancy*. 2009 Feb;28(1):85-94.
382. Best LG, Nadeau M, Bercier S, Dauphinais S, Davis J, Davis K, et al. Genetic variants, endothelial function, and risk of preeclampsia among American Indians. *Hypertension in pregnancy*. 2012;31(1):1-10.
383. Beste LA, England LJ, Schisterman EF, Qian C, Yu KF, Levine RJ. Pregnancy outcomes in smokers who develop pre-eclampsia. *Paediatric and perinatal epidemiology*. 2005 Jan;19(1):12-8.
384. Beyerlein A, Schiessl B, Lack N, von Kries R. Associations of gestational weight loss with birth-related outcome: a retrospective cohort study. *Bjog*. 2011 Jan;118(1):55-61.
385. Bezerra PC, Leao MD, Queiroz JW, Melo EM, Pereira FV, Nobrega MH, et al. Family history of hypertension as an important risk factor for the development of severe preeclampsia. *Acta Obstet*

Gynecol Scand. 2010 May;89(5):612-7.

386. Bhagwanjee S, Paruk F, Moodley J, Muckart DJ. Intensive care unit morbidity and mortality from eclampsia: an evaluation of the Acute Physiology and Chronic Health Evaluation II score and the Glasgow Coma Scale score. *Crit Care Med*. 2000 Jan;28(1):120-4.
387. Bhandari S, Raja EA, Shetty A, Bhattacharya S. Maternal and perinatal consequences of antepartum haemorrhage of unknown origin. *Bjog*. 2014 Jan;121(1):44-50; discussion -2.
388. Bhat R, Monagle P. The preterm infant with thrombosis. *Archives of Disease in Childhood: Fetal and Neonatal Edition*. 2012 November;97(6):F423-F8.
389. Bhattacharya S, Campbell DM, Liston WA, Bhattacharya S. Effect of Body Mass Index on pregnancy outcomes in nulliparous women delivering singleton babies. *BMC public health*. 2007;7:168.
390. Bhattacharya S, Prescott GJ, Iversen L, Campbell DM, Smith WCS, Hannaford PC. Hypertensive disorders of pregnancy and future health and mortality: A record linkage study. *Pregnancy Hypertension*. 2012 January;2(1):1-7.
391. Bhide A, Sankaran S, Moore J, Khalil A, Furneaux E. Ambulatory blood pressure measurements in mid-pregnancy and development of hypertensive pregnancy disorders. *Hypertension in pregnancy*. 2014 May;33(2):159-67.
392. Bian Y, Zhang Z, Liu Q, Wu D, Wang S. Maternal risk factors for low birth weight for term births in a developed region in China: A hospital-based study of 55,633 pregnancies. *Journal of Biomedical Research*. 2013;27(1):14-22.
393. Bibi S, Ghaffar S, Memon S. Severe acute maternal morbidity (SAMM) in postpartum period requiring tertiary hospital care. *Iranian Journal of Reproductive Medicine*. 2012 March/April;10(2):87-92.
394. Bibi S, Qureshi, Ahmad M, Qureshi PM, Memon A, Qazi RA. Hyperhomocysteinaemia, vascular related pregnancy complications and the response to vitamin supplementation in pregnant women of Pakistan. *JPMA The Journal of the Pakistan Medical Association*. 2010 Sep;60(9):741-5.
395. Bick D, Beake S, Chappell L, Ismail KM, McCance DR, Green JSA, et al. Management of pregnant and postnatal women with pre-existing diabetes or cardiac disease using multi-disciplinary team models of care: A systematic review. *BMC pregnancy and childbirth*. 2014 December 20;14(1).
396. Bienertova-Vasku J, Dostalova Z, Kankova K, Bienert P, Vasku A, Unzeitig V. Is there any link between severe pre-eclampsia and defined polymorphisms in leptin and adiponectin genes? *The journal of obstetrics and gynaecology research*. 2008 Oct;34(5):858-64.
397. Biesenbach G, Grafinger P, Zazgornik J, Helmut, Stoger. Perinatal complications and three-year follow up of infants of diabetic mothers with diabetic nephropathy stage IV. *Ren Fail*. 2000;22(5):573-80.
398. Biggar RJ, Poulsen G, Ng J, Melbye M, Boyd HA. HLA antigen sharing between mother and fetus as a risk factor for eclampsia and preeclampsia. *Human immunology*. 2010 Mar;71(3):263-7.
399. Bills VL, Hamdollah-Zadeh M, Soothill PW, Harper SJ, Bates DO. The role of VEGF-A165b in trophoblast survival. *BMC pregnancy and childbirth*. 2014 August 15;14(1).
400. Birkeland E, Stokke G, Tangvik RJ, Torkildsen EA, Boateng J, Wollen AL, et al. Norwegian PUQE (pregnancy-unique quantification of emesis and nausea) identifies patients with hyperemesis gravidarum and poor nutritional intake: A prospective cohort validation study. *PloS one*. 2015 01 Apr;10(4).
401. Biron-Andreani C, Bauters A, Le Cam-Duchez V, Delahousse B, Lequerrec A, Dutrillaux F, et al. Factor v leiden homozygous genotype and pregnancy outcomes. *Obstetrics and Gynecology*. 2009 December;114(6):1249-53.
402. Biselele T, Naulaers G, Bunga Muntu P, Nkidiaka E, Kapepela M, Mavinga L, et al. A descriptive study of perinatal asphyxia at the University Hospital of Kinshasa (Democratic Republic of Congo). *J Trop Pediatr*. 2013 Aug;59(4):274-9.
403. Bismuth E, Bouche C, Caliman C, Lepercq J, Lubin V, Rouge D, et al. Management of pregnancy in women with type 1 diabetes mellitus: Guidelines of the French-Speaking Diabetes Society (Societe



- francophone du diabete [SFD]). *Diabetes and Metabolism*. 2012 June;38(3):205-16.
404. Bivins HA, Jr., McCallum OJ, Roegge DD. The Mother's House: a new concept in antepartum care. *Am J Obstet Gynecol*. 2007 Aug;197(2):201.e1-3; discussion .e3-4.
405. Biyik I. Maternal serum soluble HLA-G in complicated pregnancies. *The journal of maternal-fetal & neonatal medicine : the official journal of the European Association of Perinatal Medicine, the Federation of Asia and Oceania Perinatal Societies, the International Society of Perinatal Obstet*. 2014 Mar;27(4):381-4.
406. Bjercke S, Dale PO, Tanbo T, Storeng R, Ertzeid G, Abyholm T. Impact of insulin resistance on pregnancy complications and outcome in women with polycystic ovary syndrome. *Gynecol Obstet Invest*. 2002;54(2):94-8.
407. Bjorge T, Engeland A, Tretli S, Heuch I. Birth and parental characteristics and risk of neuroblastoma in a population-based Norwegian cohort study. *Br J Cancer*. 2008 Oct 7;99(7):1165-9.
408. Bjorkenstam C, Bjorkenstam E, Hjern A, Boden R, Reutfors J. Suicide in first episode psychosis: A nationwide cohort study. *Schizophrenia Research*. 2014 August;157(1-3):1-7.
409. Bjorn Jensen C, Thorne-Lyman AL, Vadgard Hansen L, Strom M, Odgaard Nielsen N, Cohen A, et al. Development and validation of a vitamin D status prediction model in Danish pregnant women: a study of the Danish National Birth Cohort. *PloS one*. 2013;8(1):e53059.
410. Blaauw J, Souwer ET, Coffeng SM, Smit AJ, van Doormaal JJ, Faas MM, et al. Follow up of intima-media thickness after severe early-onset preeclampsia. *Acta Obstet Gynecol Scand*. 2014 Dec;93(12):1309-16.
411. Blaauw J, Van Pampus MG, Van Doormaal JJ, Fokkema MR, Fidler V, Smit AJ, et al. Increased intima-media thickness after early-onset preeclampsia. *Obstetrics and Gynecology*. 2006 June;107(6):1345-51.
412. Black KD. Stress, symptoms, self-monitoring confidence, well-being, and social support in the progression of preeclampsia/gestational hypertension. *J Obstet Gynecol Neonatal Nurs*. 2007 Sep-Oct;36(5):419-29.
413. Black LD, Nudell DM, Cha I. Relationship between preterm delivery and maternal height in teenage pregnancies. *Human reproduction*. 2000;15(2):463-8.
414. Black M, Bhattacharya S, Fairley T, Campbell DM, Shetty A. Outcomes of pregnancy in women using illegal drugs and in women who smoke cigarettes. *Acta Obstetrica et Gynecologica Scandinavica*. 2013 January;92(1):47-52.
415. Black M, Shetty A, Bhattacharya S. Obstetric outcomes subsequent to intrauterine death in the first pregnancy. *Bjog*. 2008 Jan;115(2):269-74.
416. Blackburn CA, Keelan JA, Taylor RS, North RA. Maternal serum activin A is not elevated before preeclampsia in women who are at high risk. *Am J Obstet Gynecol*. 2003 Mar;188(3):807-11.
417. Blackmore ER, Moynihan JA, Rubinow DR, Pressman EK, Gilchrist M, O'Connor TG. Psychiatric symptoms and proinflammatory cytokines in pregnancy. *Psychosomatic Medicine*. 2011 October;73(8):656-63.
418. Blackwell SC, Redman ME, Tomlinson M, Berry SM, Sorokin Y, Cotton DB. Severe pre-eclampsia remote from term: what to expect of expectant management. *The journal of maternal-fetal & neonatal medicine : the official journal of the European Association of Perinatal Medicine, the Federation of Asia and Oceania Perinatal Societies, the International Society of Perinatal Obstet*. 2002 May;11(5):321-4.
419. Blair E, de Groot J, Nelson KB. Placental infarction identified by macroscopic examination and risk of cerebral palsy in infants at 35 weeks of gestational age and over. *Am J Obstet Gynecol*. 2011 Aug;205(2):124.e1-7.
420. Blair JD, Yuen RKC, Lim BK, McFadden DE, von Dadelszen P, Robinson WP. Widespread DNA hypomethylation at gene enhancer regions in placentas associated with early-onset pre-eclampsia. *Molecular Human Reproduction*. 2013 October;19(10):697-708.

421. Blanco CG, Ballesteros AC, Saladich IG, Pla RC. Glycemic control and pregnancy outcomes in women with type 1 diabetes mellitus using lispro versus regular insulin: A systematic review and meta-analysis. *Diabetes Technology and Therapeutics*. 2011 01 Sep;13(9):907-11.
422. Blankley RT, Fisher C, Westwood M, North R, Baker PN, Walker MJ, et al. A label-free selected reaction monitoring workflow identifies a subset of pregnancy specific glycoproteins as potential predictive markers of early-onset pre-eclampsia. *Molecular & cellular proteomics : MCP*. 2013 Nov;12(11):3148-59.
423. Blessing F, Wang Y, Walli AK, Seidel D. Heparin-mediated extracorporeal low-density lipoprotein precipitation: rationale for a specific adjuvant therapy in cardiovascular disease. *Transfusion and apheresis science : official journal of the World Apheresis Association : official journal of the European Society for Haemapheresis*. 2004 Jun;30(3):255-66.
424. Block-Abraham DM, Turan OM, Doyle LE, Kopelman JN, Atlas RO, Jenkins CB, et al. First-trimester risk factors for preeclampsia development in women initiating aspirin by 16 weeks of gestation. *Obstet Gynecol*. 2014 Mar;123(3):611-7.
425. Block-Abraham DM, Turan OM, Doyle LE, Kopelman JN, Atlas RO, Jenkins CB, et al. First trimester maternal characteristics, Doppler parameters and serum analytes after preeclampsia. *Hypertension in pregnancy*. 2014 May;33(2):204-14.
426. Blom EA, Jansen PW, Verhulst FC, Hofman A, Raat H, Jaddoe VWV, et al. Perinatal complications increase the risk of postpartum depression. *The Generation R Study*. *BJOG: An International Journal of Obstetrics and Gynaecology*. 2010 October;117(11):1390-8.
427. Blomberg M. Maternal and neonatal outcomes among obese women with weight gain below the new Institute of Medicine recommendations. *Obstet Gynecol*. 2011 May;117(5):1065-70.
428. Blomberg M, Tyrberg RB, Kjolhede P. Impact of maternal age on obstetric and neonatal outcome with emphasis on primiparous adolescents and older women: A Swedish Medical Birth Register Study. *BMJ Open*. 2014;4(11).
429. Blumenfeld YJ, Baer RJ, Druzin ML, El-Sayed YY, Lyell DJ, Faucett AM, et al. Association between maternal characteristics, abnormal serum aneuploidy analytes, and placental abruption. *Am J Obstet Gynecol*. 2014 Aug;211(2):144.e1-9.
430. Blumenstein M, Prakash R, Cooper GJ, North RA. Aberrant processing of plasma vitronectin and high-molecular-weight kininogen precedes the onset of preeclampsia. *Reprod Sci*. 2009 Dec;16(12):1144-52.
431. Bo G, Hui L, Feng-Li L, Cui L. Relationships between edema degree and clinical and biochemical parameters in posterior reversible encephalopathy syndrome: a preliminary study. *Acta neurologica Belgica*. 2012 Sep;112(3):281-5.
432. Bodmer-Roy S, Morin L, Cousineau J, Rey E. Pregnancy outcomes in women with and without gestational diabetes mellitus according to the International Association of the Diabetes and Pregnancy Study Groups criteria. *Obstet Gynecol*. 2012 Oct;120(4):746-52.
433. Bodnar LM, Catov JM, Klebanoff MA, Ness RB, Roberts JM. Prepregnancy body mass index and the occurrence of severe hypertensive disorders of pregnancy. *Epidemiology (Cambridge, Mass)*. 2007 March;18(2):234-9.
434. Bodnar LM, Catov JM, Roberts JM. Racial/ethnic differences in the monthly variation of preeclampsia incidence. *Am J Obstet Gynecol*. 2007 Apr;196(4):324.e1-5.
435. Bodnar LM, Ness RB, Harger GF, Roberts JM. Inflammation and triglycerides partially mediate the effect of prepregnancy body mass index on the risk of preeclampsia. *American journal of epidemiology*. 2005 Dec 15;162(12):1198-206.
436. Bodnar LM, Ness RB, Markovic N, Roberts JM. The risk of preeclampsia rises with increasing prepregnancy body mass index. *Annals of epidemiology*. 2005 Aug;15(7):475-82.
437. Bodnar LM, Simhan HN, Catov JM, Roberts JM, Platt RW, Diesel JC, et al. Maternal vitamin D

- status and the risk of mild and severe preeclampsia. *Epidemiology (Cambridge, Mass)*. 2014 March;25(2):207-14.
438. Bodri D, Vernaev V, Figueras F, Vidal R, Guillen JJ, Coll O. Oocyte donation in patients with Turner's syndrome: A successful technique but with an accompanying high risk of hypertensive disorders during pregnancy. *Human reproduction*. 2006 March;21(3):829-32.
439. Boekhorst F, Bogers H, Martens J. Renal pelvis rupture during pregnancy: Diagnosing a confusing source of despair. *BMJ Case Reports*. 2015 12 Mar;2015(208400).
440. Boer K, Nellen JF, Patel D, Timmermans S, Tempelman C, Wibaut M, et al. The AmRo study: pregnancy outcome in HIV-1-infected women under effective highly active antiretroviral therapy and a policy of vaginal delivery. *Bjog*. 2007 Feb;114(2):148-55.
441. Boggess KA, Beck JD, Murtha AP, Moss K, Offenbacher S. Maternal periodontal disease in early pregnancy and risk for a small-for-gestational-age infant. *Am J Obstet Gynecol*. 2006 May;194(5):1316-22.
442. Boggess KA, Lieff S, Murtha AP, Moss K, Beck J, Offenbacher S. Maternal periodontal disease is associated with an increased risk for preeclampsia. *Obstet Gynecol*. 2003 Feb;101(2):227-31.
443. Boggess KA, Lieff S, Murtha AP, Moss K, Jared H, Beck J, et al. Maternal serum C-reactive protein concentration early in pregnancy and subsequent pregnancy loss. *Am J Perinatol*. 2005 Aug;22(6):299-304.
444. Boghossian NS, Yeung E, Mendola P, Hinkle SN, Laughon SK, Zhang C, et al. Risk factors differ between recurrent and incident preeclampsia: A hospital-based cohort study. *Annals of epidemiology*. 2014 01 Dec;24(12):871-7.
445. Boisrame T, Sananes N, Fritz G, Boudier E, Aissi G, Favre R, et al. Placental abruption: risk factors, management and maternal-fetal prognosis. Cohort study over 10 years. *European journal of obstetrics, gynecology, and reproductive biology*. 2014 Aug;179:100-4.
446. Boivin A, Luo ZC, Audibert F, Masse B, Lefebvre F, Tessier R, et al. Pregnancy complications among women born preterm. *Cmaj*. 2012 06 Nov;184(16):1777-84.
447. Bok LA, Vreken P, Wijburg FA, Wanders RJA, Gregersen N, Corydon MJ, et al. Short-Chain Acyl-CoA Dehydrogenase Deficiency: Studies in a Large Family Adding to the Complexity of the Disorder. *Pediatrics*. 2003 November;112(5):1152-5.
448. Bolin M, Akerud H, Cnattingius S, Stephansson O, Wikstrom AK. Hyperemesis gravidarum and risks of placental dysfunction disorders: a population-based cohort study. *Bjog*. 2013 Apr;120(5):541-7.
449. Bolin M, Akerud P, Hansson A, Akerud H. Histidine-rich glycoprotein as an early biomarker of preeclampsia. *American journal of hypertension*. 2011 Apr;24(4):496-501.
450. Bolin M, Wiberg-Itzel E, Wikstrom AK, Goop M, Larsson A, Olovsson M, et al. Angiotensin-converting enzyme/angiotensin II ratio for prediction of preeclampsia. *American journal of hypertension*. 2009 Aug;22(8):891-5.
451. Bolke E, Jehle PM, Storck M, Braun C, Schams S, Steinbach G, et al. Endovascular stent-graft placement versus conventional open surgery in infrarenal aortic aneurysm: a prospective study on acute phase response and clinical outcome. *Clinica chimica acta; international journal of clinical chemistry*. 2001 Dec;314(1-2):203-7.
452. Bolke E, Jehle PM, Trautmann M, Gotz I, Krebs B, Steinbach G, et al. Different acute-phase response in newborns and infants undergoing surgery. *Pediatr Res*. 2002 Mar;51(3):333-8.
453. Bolnga JW, Hamura NN, Umbers AJ, Rogerson SJ, Unger HW. Insights into maternal mortality in Madang Province, Papua New Guinea. *International Journal of Gynecology and Obstetrics*. 2014 February;124(2):123-7.
454. Bombrys AE, Barton JR, Nowacki EA, Habli M, Pinder L, How H, et al. Expectant management of severe preeclampsia at less than 27 weeks' gestation: maternal and perinatal outcomes according to gestational age by weeks at onset of expectant management. *Am J Obstet Gynecol*. 2008

Sep;199(3):247.e1-6.

455. Bonamy AK, Parikh NI, Cnattingius S, Ludvigsson JF, Ingelsson E. Birth characteristics and subsequent risks of maternal cardiovascular disease: effects of gestational age and fetal growth. *Circulation*. 2011 Dec 20;124(25):2839-46.
456. Bondok RS, El Sharnouby NM, Eid HE, Abd Elmaksoud AM. Pulsed steroid therapy is an effective treatment for intractable hyperemesis gravidarum. *Critical Care Medicine*. 2006 November;34(11):2781-3.
457. Bonduki CE, Feldner Jr PC, Silva J, Castro RA, Sartori MG, Girao MJ. Pregnancy after uterine arterial embolization. *Clinics*. 2011;66(5):807-10.
458. Bonet M, Smith LK, Pilkington H, Draper ES, Zeitlin J. Neighbourhood deprivation and very preterm birth in an English and French cohort. *BMC pregnancy and childbirth*. 2013 25 Apr;13(97).
459. Bonnesen B, Secher NJ, Moller LK, Rasmussen S, Andreasen KR, Renault K. Pregnancy outcomes in a cohort of women with a preconception body mass index >50 kg/m<sup>2</sup>. *Acta Obstet Gynecol Scand*. 2013 Sep;92(9):1111-4.
460. Boomsma CM, Fauser BCJM, Macklon NS. Pregnancy complications in women with polycystic ovary syndrome. *Seminars in Reproductive Medicine*. 2008 January;26(1):72-84.
461. Borg AJ, Higgins JR, Brennecke SP, Moses EK. Thrombomodulin Ala455Val dimorphism is not associated with pre-eclampsia in Australian and New Zealand women. *Gynecol Obstet Invest*. 2002;54(1):43-5.
462. Borgen I, Aamodt G, Harsem N, Haugen M, Meltzer HM, Brantsaeter AL. Maternal sugar consumption and risk of preeclampsia in nulliparous Norwegian women. *Eur J Clin Nutr*. 2012 Aug;66(8):920-5.
463. Borozdenkova S, Mant TG, Allen E, Pu K, Hoshino S, Jurcevic S. Effects of a cytokine inhibitor, JTE-607, on the response to endotoxin in healthy human volunteers. *International immunopharmacology*. 2011 Nov;11(11):1837-43.
464. Borthen I, Eide MG, Daltveit AK, Gilhus NE. Obstetric outcome in women with epilepsy: a hospital-based, retrospective study. *Bjog*. 2011 Jul;118(8):956-65.
465. Borthen I, Eide MG, Veiby G, Daltveit AK, Gilhus NE. Complications during pregnancy in women with epilepsy: Population-based cohort study. *BJOG: An International Journal of Obstetrics and Gynaecology*. 2009 December;116(13):1736-42.
466. Bortoff KD, Qiu C, Runyon S, Williams MA, Maitra R. Decreased maternal plasma apelin concentrations in preeclampsia. *Hypertension in pregnancy*. 2012;31(4):398-404.
467. Bortolus R, Blom F, Filippini F, van Poppel MN, Leoncini E, de Smit DJ, et al. Prevention of congenital malformations and other adverse pregnancy outcomes with 4.0 mg of folic acid: community-based randomized clinical trial in Italy and the Netherlands. *BMC pregnancy and childbirth*. 2014;14:166.
468. Bortoluzzi A, Padovan M, Farina I, Galuppi E, De Leonardis F, Govoni M. Therapeutic strategies in severe neuropsychiatric systemic lupus erythematosus: experience from a tertiary referral centre. *Reumatismo*. 2012;64(6):350-9.
469. Bosco C, Diaz E, Gutierrez R, Gonzalez J, Parra-Cordero M, Rodrigo R, et al. A putative role for telocytes in placental barrier impairment during preeclampsia. *Medical Hypotheses*. 2015 01 Jan;84(1):72-7.
470. Bosnjak-Nad K, Miocinovic LP, Stanojevic M, Bosnjak VM, Ahmetasevic SG, Razum S, et al. Neurodevelopmental outcome of late preterm infants  
Neurorazvojni ishod kasne nedonoscadi. *Gynaecologia et Perinatologia*. 2012;21(SUOPL.1):32-8.
471. Bouaziz M, Chaari A, Turki O, Dammak H, Chelly H, Ammar R, et al. Acute renal failure and pregnancy: a seventeen-year experience of a Tunisian intensive care unit. *Ren Fail*. 2013 Oct;35(9):1210-5.

472. Boucoiran I, Suarhana E, Rey E, Delvin E, Fraser WB, Audibert F. Repeated measures of placental growth factor, placental protein 13, and a disintegrin and metalloprotease 12 at first and second trimesters for preeclampsia screening. *Am J Perinatol*. 2013 Sep;30(8):681-8.
473. Boucoiran I, Thissier-Levy S, Wu Y, Wei SQ, Luo ZC, Delvin E, et al. Risks for preeclampsia and small for gestational age: Predictive values of placental growth factor, soluble fms-like tyrosine kinase-1, and inhibin a in singleton and multiple-gestation pregnancies. *American Journal of Perinatology*. 2013;30(7):607-12.
474. Bourjeily G, Raker CA, Chalhoub M, Miller MA. Pregnancy and fetal outcomes of symptoms of sleep-disordered breathing. *The European respiratory journal*. 2010 Oct;36(4):849-55.
475. Bouter H, Schippers EF, Luelmo SA, Versteegh MI, Ros P, Guiot HF, et al. No effect of preoperative selective gut decontamination on endotoxemia and cytokine activation during cardiopulmonary bypass: a randomized, placebo-controlled study. *Crit Care Med*. 2002 Jan;30(1):38-43.
476. Bouthoorn SH, Gaillard R, Steegers EA, Hofman A, Jaddoe VW, van Lenthe FJ, et al. Ethnic differences in blood pressure and hypertensive complications during pregnancy: the Generation R study. *Hypertension*. 2012 Jul;60(1):198-205.
477. Bouvier-Colle MH, Ouedraogo C, Dumont A, Vangeenderhuysen C, Salanave B, Decam C. Maternal mortality in West Africa. Rates, causes and substandard care from a prospective survey. *Acta Obstet Gynecol Scand*. 2001 Feb;80(2):113-9.
478. Bouzari Z, Javadiankutenai M, Darzi A, Barat S. Does proteinuria in preeclampsia have enough value to predict pregnancy outcome? *Clinical and experimental obstetrics & gynecology*. 2014;41(2):163-8.
479. Bowman ZS, Wunsche V, Porter TF, Silver RM, Branch DW. Prevalence of antiphospholipid antibodies and risk of subsequent adverse obstetric outcomes in women with prior pregnancy loss. *Journal of Reproductive Immunology*. 2015 01 Feb;107:59-63.
480. Boyajian T, Shah PS, Murphy KE. Risk of preeclampsia in HIV-positive pregnant women receiving HAART: a matched cohort study. *Journal of obstetrics and gynaecology Canada : JOGC = Journal d'obstetrique et gynecologie du Canada : JOGC*. 2012 Feb;34(2):136-41.
481. Boyd HA, Tahir H, Wohlfahrt J, Melbye M. Associations of personal and family preeclampsia history with the risk of early-, intermediate- and late-onset preeclampsia. *American journal of epidemiology*. 2013 Dec 1;178(11):1611-9.
482. Bracken H, Mundle S, Faragher B, Easterling T, Haycox A, Turner M, et al. Induction of labour in pre-eclamptic women: a randomised trial comparing the Foley balloon catheter with oral misoprostol. *BMC pregnancy and childbirth*. 2014;14:308.
483. Bradley EA, Zaidi AN, Goldsmith P, Sisk T, Colombo D, Roble S, et al. Major adverse maternal cardiovascular-related events in those with aortopathies. What should we expect? *International Journal of Cardiology*. 2014 15 Nov;177(1):229-34.
484. Brajenovic-Milic B, Tislaric D, Zuvic-Butorac M, Bacic J, Petrovic O, Ristic S, et al. Elevated second-trimester free beta-hCG as an isolated finding and pregnancy outcomes. *Fetal Diagn Ther*. 2004 Nov-Dec;19(6):483-7.
485. Bramham K, Briley AL, Seed P, Poston L, Shennan AH, Chappell LC. Adverse maternal and perinatal outcomes in women with previous preeclampsia: a prospective study. *Am J Obstet Gynecol*. 2011 Jun;204(6):512.e1-9.
486. Bramham K, Briley AL, Seed PT, Poston L, Shennan AH, Chappell LC. Pregnancy outcome in women with chronic kidney disease: a prospective cohort study. *Reprod Sci*. 2011 Jul;18(7):623-30.
487. Bramham K, Hunt BJ, Bewley S, Germain S, Calatayud I, Khamashta MA, et al. Pregnancy outcomes in systemic lupus erythematosus with and without previous nephritis. *The Journal of rheumatology*. 2011 Sep;38(9):1906-13.
488. Bramham K, Hunt BJ, Germain S, Calatayud I, Khamashta M, Bewley S, et al. Pregnancy outcome

- in different clinical phenotypes of antiphospholipid syndrome. *Lupus*. 2010 Jan;19(1):58-64.
489. Bramham K, Parnell B, Nelson-Piercy C, Seed PT, Poston L, Chappell LC. Chronic hypertension and pregnancy outcomes: Systematic review and meta-analysis. *BMJ (Online)*. 2014 15 Apr;348(g2301).
490. Bramham K, Poli-de-Figueiredo CE, Seed PT, Briley AL, Poston L, Shennan AH, et al. Association of Proteinuria Threshold in Pre-Eclampsia with Maternal and Perinatal Outcomes: A Nested Case Control Cohort of High Risk Women. *PloS one*. 2013 10 Oct;8(10).
491. Branch DW, Porter TF, Rittenhouse L, Caritis S, Sibai B, Hogg B, et al. Antiphospholipid antibodies in women at risk for preeclampsia. *Am J Obstet Gynecol*. 2001 Apr;184(5):825-32; discussion 32-4.
492. Brandao AH, Felix LR, Patricio Edo C, Leite HV, Cabral AC. Difference of endothelial function during pregnancies as a method to predict preeclampsia. *Arch Gynecol Obstet*. 2014 Sep;290(3):471-7.
493. Brantsaeter AL, Haugen M, Myhre R, Sengpiel V, Englund-Ogge L, Nilsen RM, et al. Diet matters, particularly in pregnancy - Results from MoBa studies of maternal diet and pregnancy outcomes. *Norsk Epidemiologi*. 2014;24(1-2):63-77.
494. Brantsaeter AL, Haugen M, Samuelsen SO, Torjusen H, Trogstad L, Alexander J, et al. A dietary pattern characterized by high intake of vegetables, fruits, and vegetable oils is associated with reduced risk of preeclampsia in nulliparous pregnant Norwegian women. *Journal of Nutrition*. 2009 June;139(6):1162-8.
495. Brantsaeter AL, Myhre R, Haugen M, Myking S, Sengpiel V, Magnus P, et al. Intake of probiotic food and risk of preeclampsia in primiparous women: the Norwegian Mother and Child Cohort Study. *American journal of epidemiology*. 2011 Oct 1;174(7):807-15.
496. Brantsaeter AL, Myhre R, Haugen M, Myking S, Sengpiel V, Magnus P, et al. Intake of probiotic food and risk of preeclampsia in primiparous women. *American journal of epidemiology*. 2011 01 Oct;174(7):807-15.
497. Breathett K, Muhlestein D, Foraker R, Gulati M. Differences in preeclampsia rates between African American and caucasian women: Trends from the National Hospital Discharge Survey. *Journal of Women's Health*. 2014 01 Nov;23(11):886-93.
498. Breathnach FM, McAuliffe FM, Geary M, Daly S, Higgins JR, Dornan J, et al. Optimum timing for planned delivery of uncomplicated monochorionic and dichorionic twin pregnancies. *Obstetrics and Gynecology*. 2012 January;119(1):50-9.
499. Breslin E, Kaufmann A, Quenby S. Bilirubin influences the clinical presentation of pre-eclampsia. *European journal of obstetrics, gynecology, and reproductive biology*. 2013 Sep;170(1):111-3.
500. Bretelle F, Arnoux D, Shojai R, D'Ercole C, Sampol J, Dignat F, et al. Protein Z in patients with pregnancy complications. *Am J Obstet Gynecol*. 2005 Nov;193(5):1698-702.
501. Brettell R, Yeh PS, Impey LW. Examination of the association between male gender and preterm delivery. *European journal of obstetrics, gynecology, and reproductive biology*. 2008 Dec;141(2):123-6.
502. Brewer J, Owens MY, Wallace K, Reeves AA, Morris R, Khan M, et al. Posterior reversible encephalopathy syndrome in 46 of 47 patients with eclampsia. *Am J Obstet Gynecol*. 2013 Jun;208(6):468.e1-6.
503. Briese V, Voigt M, Hermanussen M, Wittwer-Backofen U. Morbid obesity: pregnancy risks, birth risks and status of the newborn. *Homo : internationale Zeitschrift fur die vergleichende Forschung am Menschen*. 2010 Feb;61(1):64-72.
504. Brix N, Sellmer A, Jensen MS, Pedersen LV, Henriksen TB. Predictors for an unsuccessful INTubation-SURfactant-Extubation procedure: a cohort study. *BMC Pediatr*. 2014;14:155.
505. Brohi ZP, Sadaf A, Perveen U. Etiology, clinical features and outcome of fulminant hepatic failure in pregnancy. *Journal of the Pakistan Medical Association*. 2013 September;63(9):1168-71.
506. Bromley B, Shipp TD, Benacerraf B. Isolated polydactyly: prenatal diagnosis and perinatal outcome. *Prenatal diagnosis*. 2000 Nov;20(11):905-8.
507. Brosens IA, De Sutter P, Hamerlynck T, Imeraj L, Yao Z, Cloke B, et al. Endometriosis is associated

- with a decreased risk of pre-eclampsia. *Human reproduction*. 2007 June;22(6):1725-9.
508. Brown MA, Davis GK, McHugh L. The prevalence and clinical significance of nocturnal hypertension in pregnancy. *J Hypertens*. 2001 Aug;19(8):1437-44.
509. Brown MA, Holt JL, Mangos GJ, Murray N, Curtis J, Homer C. Microscopic hematuria in pregnancy: relevance to pregnancy outcome. *American journal of kidney diseases : the official journal of the National Kidney Foundation*. 2005 Apr;45(4):667-73.
510. Brown MA, Mackenzie C, Dunsmuir W, Roberts L, Ikin K, Matthews J, et al. Can we predict recurrence of pre-eclampsia or gestational hypertension? *Bjog*. 2007 Aug;114(8):984-93.
511. Brown MC, Bell R, Collins C, Waring G, Robson SC, Waugh J, et al. Women's perception of future risk following pregnancies complicated by preeclampsia. *Hypertension in pregnancy*. 2013;32(1):60-73.
512. Browning MF, Levy HL, Wilkins-Haug LE, Larson C, Shih VE. Fetal fatty acid oxidation defects and maternal liver disease in pregnancy. *Obstet Gynecol*. 2006 Jan;107(1):115-20.
513. Brucato A, Doria A, Frassi M, Castellino G, Franceschini F, Faden D, et al. Pregnancy outcome in 100 women with autoimmune diseases and anti-Ro/SSA antibodies: a prospective controlled study. *Lupus*. 2002;11(11):716-21.
514. Brucato A, Imazio M, Curri S, Palmieri G, Trincherio R. Medical treatment of pericarditis during pregnancy. *Int J Cardiol*. 2010 Oct 29;144(3):413-4.
515. Brun C, Zieleskiewicz L, Textoris J, Muller L, Bellefleur JP, Antonini F, et al. Prediction of fluid responsiveness in severe preeclamptic patients with oliguria. *Intensive care medicine*. 2013 Apr;39(4):593-600.
516. Bryant AS, Seely EW, Cohen A, Lieberman E. Patterns of pregnancy-related hypertension in black and white women. *Hypertension in pregnancy*. 2005;24(3):281-90.
517. Bryant AS, Washington S, Kuppermann M, Cheng YW, Caughey AB. Quality and equality in obstetric care: racial and ethnic differences in caesarean section delivery rates. *Paediatric and perinatal epidemiology*. 2009 September;23(5):454-62.
518. Bryant M, Santorelli G, Lawlor DA, Farrar D, Tuffnell D, Bhopal R, et al. A comparison of South Asian specific and established BMI thresholds for determining obesity prevalence in pregnancy and predicting pregnancy complications: findings from the Born in Bradford cohort. *Int J Obes (Lond)*. 2014 Mar;38(3):444-50.
519. Buchbinder A, Sibai BM, Caritis S, Macpherson C, Hauth J, Lindheimer MD, et al. Adverse perinatal outcomes are significantly higher in severe gestational hypertension than in mild preeclampsia. *Am J Obstet Gynecol*. 2002 Jan;186(1):66-71.
520. Bucher M, Taeger K. Endothelin-receptor gene-expression in rat endotoxemia. *Intensive care medicine*. 2002 May;28(5):642-7.
521. Budde MP, De Lange TE, Dekker GA, Chan A, Nguyen AM. Risk factors for placental abruption in a socio-economically disadvantaged region. *The journal of maternal-fetal & neonatal medicine : the official journal of the European Association of Perinatal Medicine, the Federation of Asia and Oceania Perinatal Societies, the International Society of Perinatal Obstet*. 2007 Sep;20(9):687-93.
522. Budden A, Wilkinson L, Buksh MJ, McCowan L. Pregnancy outcome in women presenting with pre-eclampsia at less than 25 weeks gestation. *Australian and New Zealand Journal of Obstetrics and Gynaecology*. 2006 October;46(5):407-12.
523. Bueno-Sanchez JC, Pena-Alzate S, Pena RB, Agudelo-Jaramillo B, Cadavid-Jaramillo AP, Chaouat G, et al. Sera from early-onset, severely preeclamptic women directly modulate HLA-E expression in the EA.hy296 endothelial cell line. *J Reprod Immunol*. 2014 Oct;104-105:68-79.
524. Bugg GJ, Atwal GS, Maresh M. Grandmultiparae in a modern setting. *BJOG: An International Journal of Obstetrics and Gynaecology*. 2002 March;109(3):249-53.
525. Buhimschi IA, Zhao G, Funai EF, Harris N, Sasson IE, Bernstein IM, et al. Proteomic profiling of urine identifies specific fragments of SERPINA1 and albumin as biomarkers of preeclampsia. *Am J Obstet*

Gynecol. 2008 Nov;199(5):551.e1-16.

526. Buimer M, van Wassenaer AG, Ganzevoort W, Wolf H, Bleker OP, Kok JH. Transient hypothyroxinemia in severe hypertensive disorders of pregnancy. *Obstet Gynecol.* 2005 Nov;106(5 Pt 1):973-9.
527. Bujold E, Roberge S, Lacasse Y, Bureau M, Audibert F, Marcoux S, et al. Prevention of preeclampsia and intrauterine growth restriction with aspirin started in early pregnancy: A meta-analysis. *Obstetrics and Gynecology.* 2010 August;116(2 PART 1):402-14.
528. Bukar M, Audu BM, Massa AA. Caesarean delivery at the Federal Medical Centre Gombe: a 3-year experience. *Niger J Med.* 2009 Apr-Jun;18(2):179-83.
529. Bullock N, Breese McCoy SJ, Payton ME. Role of race in the seasonality of deliveries with preeclampsia. *Medical Hypotheses.* 2011 October;77(4):674-6.
530. Burke SD, Seaward AVC, Ramshaw H, Smith GN, Virani S, Croy BA, et al. Homing receptor expression is deviated on CD56+ blood lymphocytes during pregnancy in Type 1 diabetic women. *PLoS one.* 2015 20 Mar;10(3).
531. Burnett E, Loucks TL, Lindsay M. Perinatal outcomes in HIV positive pregnant women with concomitant sexually transmitted infections. *Infectious Diseases in Obstetrics and Gynecology.* 2015;2015(508482).
532. Burnett MM, Hess CP, Roberts JP, Bass NM, Douglas VC, Josephson SA. Presentation of reversible posterior leukoencephalopathy syndrome in patients on calcineurin inhibitors. *Clinical neurology and neurosurgery.* 2010 Dec;112(10):886-91.
533. Burris HH, Rifas-Shiman SL, Huh SY, Kleinman K, Litonjua AA, Oken E, et al. Vitamin D status and hypertensive disorders in pregnancy. *Annals of epidemiology.* 2014 May;24(5):399-403.e1.
534. Burton A, Ananth CV. Contributions of ischaemic placental disease to preterm birth in twin gestations. *The journal of maternal-fetal & neonatal medicine : the official journal of the European Association of Perinatal Medicine, the Federation of Asia and Oceania Perinatal Societies, the International Society of Perinatal Obstet.* 2010 Oct;23(10):1183-6.
535. Bush N, Nelson-Piercy C, Spark P, Kurinczuk JJ, Brocklehurst P, Knight M. Myocardial infarction in pregnancy and postpartum in the UK. *Eur J Prev Cardiol.* 2013 Feb;20(1):12-20.
536. Bushnell CD, Jamison M, James AH. Migraines during pregnancy linked to stroke and vascular diseases: US population based case-control study. *BMJ (Online).* 2009 04 Apr;338(7698):821.
537. Buttenschoen K, Kornmann M, Berger D, Leder G, Beger HG, Vasilescu C. Endotoxemia and endotoxin tolerance in patients with ARDS. *Langenbeck's archives of surgery / Deutsche Gesellschaft fur Chirurgie.* 2008 Jul;393(4):473-8.
538. Buttenschoen K, Schneider ME, Utz K, Kornmann M, Beger HG, Carli Buttenschoen D. Effect of major abdominal surgery on endotoxin release and expression of Toll-like receptors 2/4. *Langenbeck's archives of surgery / Deutsche Gesellschaft fur Chirurgie.* 2009 Mar;394(2):293-302.
539. Byberg KK, Ogland B, Eide GE, Oymar K. Birth after preeclamptic pregnancies: association with allergic sensitization and allergic rhinoconjunctivitis in late childhood; a historically matched cohort study. *BMC Pediatr.* 2014;14:101.
540. Byrne M, Agerbo E, Bennedsen B, Eaton WW, Mortensen PB. Obstetric conditions and risk of first admission with schizophrenia: A Danish national register based study. *Schizophrenia Research.* 2007 December;97(1-3):51-9.
541. Byron-Scott R, Sharpe P, Hasler C, Cundy P, Hirte C, Chan A, et al. A South Australian population-based study of congenital talipes equinovarus. *Paediatric and perinatal epidemiology.* 2005 May;19(3):227-37.
542. Cagayan MS. Hydatidiform mole and its complications: review of patient profiles and management at the university of the Philippines-Philippine General Hospital. *The Journal of reproductive medicine.* 2014 May-Jun;59(5-6):235-40.



543. Cahill AG, Stamilio DM, Odibo AO, Peipert JF, Stevens EJ, Macones GA. Does a maximum dose of oxytocin affect risk for uterine rupture in candidates for vaginal birth after cesarean delivery? *American Journal of Obstetrics and Gynecology*. 2007 November;197(5):495.e1-.e5.
544. Calderon-Margalit R, Friedlander Y, Yanetz R, Deutsch L, Manor O, Harlap S, et al. Late stillbirths and long-term mortality of mothers. *Obstet Gynecol*. 2007 Jun;109(6):1301-8.
545. Calderon-Margalit R, Friedlander Y, Yanetz R, Deutsch L, Perrin MC, Kleinhaus K, et al. Preeclampsia and subsequent risk of cancer: update from the Jerusalem Perinatal Study. *Am J Obstet Gynecol*. 2009 Jan;200(1):63.e1-5.
546. Calhoun BC, Jennings BM, Peniston J, Patience T, Pulos E, Hume R, et al. Focused obstetrical clinic for active duty junior enlisted service women: model for improved outcomes. *Military medicine*. 2000 Jan;165(1):45-8.
547. Caliskan E, Ozkan S, Cakiroglu Y, Yalcinkaya O, Polat A, Corakci A. The effects of maternal anxiety prior to amniocentesis on uterine and fetal umbilical blood flow. *Journal of the Turkish German Gynecology Association*. 2009;10(3):162-7.
548. Callaway LK, David McIntyre H, Williams GM, Najman JM, Lawlor DA, Mamun A. Diagnosis and treatment of hypertension 21 years after a hypertensive disorder of pregnancy. *Australian and New Zealand Journal of Obstetrics and Gynaecology*. 2011 October;51(5):437-40.
549. Callaway LK, Lawlor DA, O'Callaghan M, Williams GM, Najman JM, McIntyre HD. Diabetes mellitus in the 21 years after a pregnancy that was complicated by hypertension: findings from a prospective cohort study. *Am J Obstet Gynecol*. 2007 Nov;197(5):492.e1-7.
550. Callaway LK, Mamun A, McIntyre HD, Williams GM, Najman JM, Nitert MD, et al. Does a history of hypertensive disorders of pregnancy help predict future essential hypertension? Findings from a prospective pregnancy cohort study. *Journal of human hypertension*. 2013 May;27(5):309-14.
551. Callaway LK, McIntyre HD, O'Callaghan M, Williams GM, Najman JM, Lawlor DA. The association of hypertensive disorders of pregnancy with weight gain over the subsequent 21 years: Findings from a prospective cohort study. *American journal of epidemiology*. 2007 July;166(4):421-8.
552. Calleja-Agius J, Schembri-Wismayer P, Calleja N, Brincat M, Spiteri D. Obstetric outcome and cytokine levels in threatened miscarriage. *Gynecological Endocrinology*. 2011 February;27(2):121-7.
553. Calvano JE, Bowers DJ, Coyle SM, Macor M, Reddell MT, Kumar A, et al. Response to systemic endotoxemia among humans bearing polymorphisms of the Toll-like receptor 4 (hTLR4). *Clinical immunology (Orlando, Fla)*. 2006 Nov;121(2):186-90.
554. Campbell DI, Elia M, Lunn PG. Growth faltering in rural Gambian infants is associated with impaired small intestinal barrier function, leading to endotoxemia and systemic inflammation. *The Journal of nutrition*. 2003 May;133(5):1332-8.
555. Campbell MK, Cartier S, Xie B, Kouniakos G, Huang W, Han V. Determinants of small for gestational age birth at term. *Paediatric and perinatal epidemiology*. 2012 Nov;26(6):525-33.
556. Campbell MK, Challis JR, DaSilva O, Bocking AD. A cohort study found that white blood cell count and endocrine markers predicted preterm birth in symptomatic women. *J Clin Epidemiol*. 2005 Mar;58(3):304-10.
557. Canakci V, Canakci CF, Canakci H, Canakci E, Cicek Y, Ingec M, et al. Periodontal disease as a risk factor for pre-eclampsia: a case control study. *The Australian & New Zealand journal of obstetrics & gynaecology*. 2004 Dec;44(6):568-73.
558. Cannon M, Jones PB, Murray RM. Obstetric complications and schizophrenia: historical and meta-analytic review. *The American journal of psychiatry*. 2002 Jul;159(7):1080-92.
559. Canti V, Maggio L, Ramirez GA, Locatelli A, Cozzolino S, Ramoni V, et al. Hypertension negatively affects the pregnancy outcome in patients with antiphospholipid syndrome. *Lupus*. 2012 Jun;21(7):810-2.
560. Canto MJ, Reus A, Cortes S, Ojeda F. Pregnancy outcome in a Spanish population of women

- beyond age 40 delivered above 32 weeks' gestation. *The journal of maternal-fetal & neonatal medicine : the official journal of the European Association of Perinatal Medicine, the Federation of Asia and Oceania Perinatal Societies, the International Society of Perinatal Obstet.* 2012 May;25(5):461-6.
561. Canzoneri BJ, Lewis DF, Groome L, Wang Y. Increased neutrophil numbers account for leukocytosis in women with preeclampsia. *Am J Perinatol.* 2009 Nov;26(10):729-32.
562. Capula C, Chiefari E, Vero A, Arcidiacono B, Iiritano S, Puccio L, et al. Gestational diabetes mellitus: Screening and outcomes in southern Italian pregnant women. *ISRN Endocrinology.* 2013;1(1).
563. Caradeux J, Serra R, Nien JK, Perez-Sepulveda A, Schepeler M, Guerra F, et al. First trimester prediction of early onset preeclampsia using demographic, clinical, and sonographic data: a cohort study. *Prenatal diagnosis.* 2013 Aug;33(8):732-6.
564. Carbone IF, Cruz JJ, Sarquis R, Akolekar R, Nicolaides KH. Assisted conception and placental perfusion assessed by uterine artery Doppler at 1113 weeks' gestation. *Human reproduction.* 2011 July;26(7):1659-64.
565. Cardenas-Mondragon MG, Vallejo-Flores G, Delgado-Dominguez J, Romero-Arauz JF, Gomez-Delgado A, Aguilar-Madrid G, et al. Preeclampsia is associated with lower production of vascular endothelial growth factor by peripheral blood mononuclear cells. *Arch Med Res.* 2014 Oct;45(7):561-9.
566. Carlsen SM, Romundstad P, Jacobsen G. Early second-trimester maternal hyperandrogenemia and subsequent preeclampsia: a prospective study. *Acta Obstet Gynecol Scand.* 2005 Feb;84(2):117-21.
567. Carmona F, Font J, Moga I, Lazaro I, Cervera R, Pac V, et al. Class III-IV proliferative lupus nephritis and pregnancy: A study of 42 cases. *American Journal of Reproductive Immunology.* 2005 April;53(4):182-8.
568. Carpenter MW. Gestational diabetes, pregnancy hypertension, and late vascular disease. *Diabetes Care.* 2007 July;30(SUPPL. 2):S246-S50.
569. Carpenter TT, Walker WJ. Pregnancy following uterine artery embolisation for symptomatic fibroids: A series of 26 completed pregnancies. *BJOG: An International Journal of Obstetrics and Gynaecology.* 2005 March;112(3):321-5.
570. Carr DB, Larson AM, Schmucker BC, Brateng DA, Carithers Jr RL, Easterling TR. Maternal hemodynamics and pregnancy outcome in women with prior orthotopic liver transplantation. *Liver Transplantation.* 2000 March;6(2):213-21.
571. Carr DB, McDonald GB, Brateng D, Desai M, Thach CT, Easterling TR. The relationship between hemodynamics and inflammatory activation in women at risk for preeclampsia. *Obstetrics and Gynecology.* 2001;98(6):1109-16.
572. Carr DB, Newton KM, Utzschneider KM, Faulenbach MV, Kahn SE, Easterling TR, et al. Gestational diabetes or lesser degrees of glucose intolerance and risk of preeclampsia. *Hypertension in pregnancy.* 2011;30(2):153-63.
573. Carr DB, Newton KM, Utzschneider KM, Tong J, Gerchman F, Kahn SE, et al. Preeclampsia and risk of developing subsequent diabetes. *Hypertension in pregnancy.* 2009 Aug;28(4):435-47.
574. Carr DB, Newton KM, Utzschneider KM, Tong J, Gerchman F, Kahn SE, et al. Preeclampsia and risk of developing subsequent diabetes preeclampsia and risk of subsequent diabetes. *Hypertension in pregnancy.* 2009 November;28(4):435-47.
575. Carr DB, Tran LT, Brateng DA, Kawamura C, Shofer JB, Karumanchi SA, et al. Hemodynamically-directed atenolol therapy is associated with a blunted rise in maternal sFLT-1 levels during pregnancy. *Hypertension in pregnancy.* 2009 Feb;28(1):42-55.
576. Carroll RC, Owers RL, Elder RF, Hennessey MD, Patteson SK, Snider CC, et al. Lack of thrombopoietin potentiation of platelet collagen activation in the first trimester is associated with preeclampsia. *Thromb Res.* 2005;116(1):51-4.
577. Carter MF, Fowler S, Holden A, Xenakis E, Dudley D. The late preterm birth rate and its association with comorbidities in a population-based study. *Am J Perinatol.* 2011 Oct;28(9):703-7.

578. Carty DM, Anderson LA, Freeman DJ, Welsh PI, Brennand JE, Dominiczak AF, et al. Early pregnancy soluble E-selectin concentrations and risk of preeclampsia. *J Hypertens*. 2012 May;30(5):954-9.
579. Carty DM, Neisius U, Rooney LK, Dominiczak AF, Delles C. Pulse wave analysis for the prediction of preeclampsia. *Journal of human hypertension*. 2014 Feb;28(2):98-104.
580. Carvalho Rodrigues L. False positive results of trisomy 21 prenatal screening as a surrogate marker for adverse pregnancy outcome. *Diagnostico Prenatal*. 2013 October-December;24(4):135-40.
581. Carwile JL, Mahalingaiah S, Winter MR, Aschengrau A. Prenatal drinking-water exposure to tetrachloroethylene and ischemic placental disease: a retrospective cohort study. *Environmental health : a global access science source*. 2014;13:72.
582. Casanova MJ, Chaparro M, Domenech E, Barreiro-De Acosta M, Bermejo F, Iglesias E, et al. Safety of thiopurines and Anti-TNF-alpha drugs during pregnancy in patients with inflammatory bowel disease. *American Journal of Gastroenterology*. 2013 March;108(3):433-40.
583. Casey BM, Dashe JS, Wells CE, McIntire DD, Byrd W, Leveno KJ, et al. Subclinical hypothyroidism and pregnancy outcomes. *Obstetrics and Gynecology*. 2005 February;105(2):239-45.
584. Castellino G, Capucci R, Bernardi S, Padovan M, Giacuzzo S, Pivato E, et al. Pregnancy in patients with undifferentiated connective tissue disease: a prospective case-control study. *Lupus*. 2011 Oct;20(12):1305-11.
585. Castiglioni MT, Valsecchi L, Cavoretto P, Pirola S, Di Piazza L, Maggio L, et al. The risk of preeclampsia beyond the first pregnancy among women with type 1 diabetes parity and preeclampsia in type 1 diabetes. *Pregnancy Hypertension*. 2014 January;4(1):34-40.
586. Castro J, Billick S, Kleiman A, Chiechi M, Al-Rashdan M. Confounding psychosis in the postpartum period. *Psychiatric Quarterly*. 2014 March;85(1):91-6.
587. Catanzarite V, Willms D, Wong D, Landers C, Cousins L, Schrimmer D. Acute respiratory distress syndrome in pregnancy and the puerperium: causes, courses, and outcomes. *Obstet Gynecol*. 2001 May;97(5 Pt 1):760-4.
588. Catov JM, Abatemarco DJ, Markovic N, Roberts JM. Anxiety and optimism associated with gestational age at birth and fetal growth. *Matern Child Health J*. 2010 Sep;14(5):758-64.
589. Catov JM, Bertolet M, Chen YF, Evans RW, Hubel CA. Nonesterified fatty acids and spontaneous preterm birth: a factor analysis for identification of risk patterns. *American journal of epidemiology*. 2014 May 15;179(10):1208-15.
590. Catov JM, Bodnar LM, Ness RB, Barron SJ, Roberts JM. Inflammation and dyslipidemia related to risk of spontaneous preterm birth. *American journal of epidemiology*. 2007 Dec 1;166(11):1312-9.
591. Catov JM, Bodnar LM, Ness RB, Markovic N, Roberts JM. Association of periconceptional multivitamin use and risk of preterm or small-for-gestational-age births. *American journal of epidemiology*. 2007 Aug 1;166(3):296-303.
592. Catov JM, Dodge R, Yamal JM, Roberts JM, Piller LB, Ness RB. Prior preterm or small-for-gestational-age birth related to maternal metabolic syndrome. *Obstet Gynecol*. 2011 Feb;117(2 Pt 1):225-32.
593. Catov JM, Ness RB, Kip KE, Olsen J. Risk of early or severe pre-eclampsia related to pre-existing conditions. *International journal of epidemiology*. 2007 Apr;36(2):412-9.
594. Catov JM, Ness RB, Kip KE, Olsen J. Risk of early or severe preeclampsia related to pre-existing conditions. *International journal of epidemiology*. 2007 April;36(2):412-9.
595. Catov JM, Nohr EA, Bodnar LM, Knudson VK, Olsen SF, Olsen J. Association of periconceptional multivitamin use with reduced risk of preeclampsia among normal-weight women in the Danish National Birth Cohort. *American journal of epidemiology*. 2009 Jun 1;169(11):1304-11.
596. Catov JM, Wu CS, Olsen J, Sutton-Tyrrell K, Li J, Nohr EA. Early or recurrent preterm birth and maternal cardiovascular disease risk. *Annals of epidemiology*. 2010 Aug;20(8):604-9.

597. Caughey AB, Stotland NE, Washington AE, Escobar GJ. Maternal ethnicity, paternal ethnicity, and parental ethnic discordance: predictors of preeclampsia. *Obstet Gynecol.* 2005 Jul;106(1):156-61.
598. Causarano V, Galbiati S, Smid M, Cremonesi L, Ferrari M. An improved methodological approach for the analysis of cell-free RNA in maternal plasma. *Biochimica Clinica.* 2011 August;35(4):295-300.
599. Cavkaytar S, Ugurlu EN, Karaer A, Tapisiz OL, Danisman N. Are clinical symptoms more predictive than laboratory parameters for adverse maternal outcome in HELLP syndrome? *Acta Obstet Gynecol Scand.* 2007;86(6):648-51.
600. Cedergren M. Effects of gestational weight gain and body mass index on obstetric outcome in Sweden. *International journal of gynaecology and obstetrics: the official organ of the International Federation of Gynaecology and Obstetrics.* 2006 Jun;93(3):269-74.
601. Cedergren M, Brynhildsen J, Josefsson A, Sydsjo A, Sydsjo G. Hyperemesis gravidarum that requires hospitalization and the use of antiemetic drugs in relation to maternal body composition. *American Journal of Obstetrics and Gynecology.* 2008 April;198(4):412.e1-.e5.
602. Cedergren MI. Maternal morbid obesity and the risk of adverse pregnancy outcome. *Obstet Gynecol.* 2004 Feb;103(2):219-24.
603. Cedergren MI. Optimal gestational weight gain for body mass index categories. *Obstetrics and Gynecology.* 2007 October;110(4):759-64.
604. Cedergren MI, Kallen BA. Obstetric outcome of 6346 pregnancies with infants affected by congenital heart defects. *European journal of obstetrics, gynecology, and reproductive biology.* 2006 Apr 1;125(2):211-6.
605. Ceelen M, van Weissenbruch MM, Vermeiden JPW, van Leeuwen FE, Delemarre-van de Waal HA. Growth and development of children born after in vitro fertilization. *Fertility and sterility.* 2008 November;90(5):1662-73.
606. Celebi S, Hacimustafaoglu M, Koksall N, Ozkan H, Cetinkaya M, Ener B. Neonatal candidiasis: results of an 8 year study. *Pediatrics international : official journal of the Japan Pediatric Society.* 2012 Jun;54(3):341-9.
607. Centlow M, Carninci P, Nemeth K, Mezey E, Brownstein M, Hansson SR. Placental expression profiling in preeclampsia: local overproduction of hemoglobin may drive pathological changes. *Fertility and sterility.* 2008 Nov;90(5):1834-43.
608. Cerhan JR, Sellers TA, Janney CA, Pankratz VS, Brandt KR, Vachon CM. Prenatal and perinatal correlates of adult mammographic breast density. *Cancer epidemiology, biomarkers & prevention : a publication of the American Association for Cancer Research, cosponsored by the American Society of Preventive Oncology.* 2005 Jun;14(6):1502-8.
609. Cetin I, Cozzi V, Papageorgiou AT, Maina V, Montanelli A, Garlanda C, et al. First trimester PTX3 levels in women who subsequently develop preeclampsia and fetal growth restriction. *Acta Obstet Gynecol Scand.* 2009;88(7):846-9.
610. Cetinkaya M, Bostan O, Koksall N, Semizel E, Ozkan H, Cakir S. Early left ventricular diastolic dysfunction in premature infants born to preeclamptic mothers. *J Perinat Med.* 2011 Jan;39(1):89-95.
611. Cetinkaya M, Ozkan H, Koksall N. Maternal preeclampsia is associated with increased risk of necrotizing enterocolitis in preterm infants. *Early Human Development.* 2012 November;88(11):893-8.
612. Ch U, Guruvare S, Bhat SS, Rai L, Rao S. Evaluation of placenta in foetal demise and foetal growth restriction. *Journal of Clinical and Diagnostic Research.* 2013 10 Nov;7(11):2530-3.
613. Chaffin DG, Webb DG. Outcomes of pregnancies at risk for hypertensive complications managed using impedance cardiography. *Am J Perinatol.* 2009 Nov;26(10):717-21.
614. Chaiwarith R, Prommee N, Liwrisakun C, Oberdorfer P, Nuntachit N, Pothirat C. A novel influenza A H1N1 clinical manifestations in patients at Chiang Mai University Hospital. *Journal of the Medical Association of Thailand = Chotmaihet thangphaet.* 2011 Aug;94(8):908-15.
615. Chaiworapongsa T, Gervasi MT, Refuerzo J, Espinoza J, Yoshimatsu J, Berman S, et al. Maternal

- lymphocyte subpopulations (CD45RA+ and CD45RO+) in preeclampsia. *Am J Obstet Gynecol.* 2002 Oct;187(4):889-93.
616. Chaiworapongsa T, Romero R, Espinoza J, Bujold E, Mee Kim Y, Goncalves LF, et al. Evidence supporting a role for blockade of the vascular endothelial growth factor system in the pathophysiology of preeclampsia. Young Investigator Award. *Am J Obstet Gynecol.* 2004 Jun;190(6):1541-7; discussion 7-50.
617. Chaiworapongsa T, Romero R, Korzeniewski SJ, Cortez JM, Pappas A, Tarca AL, et al. Plasma concentrations of angiogenic/anti-angiogenic factors have prognostic value in women presenting with suspected preeclampsia to the obstetrical triage area: a prospective study. *The journal of maternal-fetal & neonatal medicine : the official journal of the European Association of Perinatal Medicine, the Federation of Asia and Oceania Perinatal Societies, the International Society of Perinatal Obstet.* 2014 Jan;27(2):132-44.
618. Chaiworapongsa T, Romero R, Korzeniewski SJ, Kusanovic JP, Soto E, Lam J, et al. Maternal plasma concentrations of angiogenic/antiangiogenic factors in the third trimester of pregnancy to identify the patient at risk for stillbirth at or near term and severe late preeclampsia. *Am J Obstet Gynecol.* 2013 Apr;208(4):287.e1-.e15.
619. Chaiworapongsa T, Romero R, Savasan ZA, Kusanovic JP, Ogge G, Soto E, et al. Maternal plasma concentrations of angiogenic/anti-angiogenic factors are of prognostic value in patients presenting to the obstetrical triage area with the suspicion of preeclampsia. *The journal of maternal-fetal & neonatal medicine : the official journal of the European Association of Perinatal Medicine, the Federation of Asia and Oceania Perinatal Societies, the International Society of Perinatal Obstet.* 2011 Oct;24(10):1187-207.
620. Chaiworapongsa T, Romero R, Tarca A, Kusanovic JP, Mittal P, Kim SK, et al. A subset of patients destined to develop spontaneous preterm labor has an abnormal angiogenic/anti-angiogenic profile in maternal plasma: evidence in support of pathophysiologic heterogeneity of preterm labor derived from a longitudinal study. *The journal of maternal-fetal & neonatal medicine : the official journal of the European Association of Perinatal Medicine, the Federation of Asia and Oceania Perinatal Societies, the International Society of Perinatal Obstet.* 2009 Dec;22(12):1122-39.
621. Chaiworapongsa T, Romero R, Whitten A, Tarca AL, Bhatti G, Draghici S, et al. Differences and similarities in the transcriptional profile of peripheral whole blood in early and late-onset preeclampsia: insights into the molecular basis of the phenotype of preeclampsia. *J Perinat Med.* 2013 Sep 1;41(5):485-504.
622. Chakravarty A, Chakrabarti SD. The neurology of eclampsia : some observations. *Neurology India.* 2002 Jun;50(2):128-35.
623. Chakravarty EF, Colon I, Langen ES, Nix DA, El-Sayed YY, Genovese MC, et al. Factors that predict prematurity and preeclampsia in pregnancies that are complicated by systemic lupus erythematosus. *Am J Obstet Gynecol.* 2005 Jun;192(6):1897-904.
624. Chambers AE, Griffin C, Naif SA, Mills I, Mills WE, Syngelaki A, et al. Quantitative ELISAs for serum soluble LHCGR and hCG-LHCGR complex: potential diagnostics in first trimester pregnancy screening for stillbirth, Down's syndrome, preterm delivery and preeclampsia. *Reproductive biology and endocrinology : RB&E.* 2012;10:113.
625. Chames MC, Haddad B, Barton JR, Livingston JC, Sibai BM. Subsequent pregnancy outcome in women with a history of HELLP syndrome at < or = 28 weeks of gestation. *Am J Obstet Gynecol.* 2003 Jun;188(6):1504-7; discussion 7-8.
626. Chan LY, Chiu PY, Lau TK. Cord blood thyroid-stimulating hormone level in high-risk pregnancies. *European journal of obstetrics, gynecology, and reproductive biology.* 2003 Jun 10;108(2):142-5.
627. Chan LY, Tam WH, Lau TK. Venous thromboembolism in pregnant Chinese women. *Obstet Gynecol.* 2001 Sep;98(3):471-5.

628. Chan P, Brown M, Simpson JM, Davis G. Proteinuria in pre-eclampsia: how much matters? *Bjog*. 2005 Mar;112(3):280-5.
629. Chandrasekaran S, Sammel MD, Srinivas SK. Are we making a mountain out of a mole hill? A call to appropriate interpretation of clinical trials and population-based studies. *American Journal of Obstetrics and Gynecology*. 2013 June;208(6):438-41.
630. Chang AY, Schwab ICW, Kaplan BS, Kolon TF. Asynchronous bilateral renal venous thrombosis with subsequent development of cystic kidneys. *Journal of Pediatric Urology*. 2007 June;3(3):255-7.
631. Chang EY, Menard MK, Vermillion ST, Hulseley T, Ebeling M. The association between hyaline membrane disease and preeclampsia. *Am J Obstet Gynecol*. 2004 Oct;191(4):1414-7.
632. Chang JJ, Muglia LJ, Macones GA. Association of early-onset pre-eclampsia in first pregnancy with normotensive second pregnancy outcomes: a population-based study. *Bjog*. 2010 Jul;117(8):946-53.
633. Chang JJ, Stamilio DM, Macones GA. Effect of hospital volume on maternal outcomes in women with prior cesarean delivery undergoing trial of labor. *American journal of epidemiology*. 2008 Mar 15;167(6):711-8.
634. Chang JJ, Strauss JF, Deshazo JP, Rigby FB, Chelmow DP, Macones GA. Reassessing the impact of smoking on preeclampsia/eclampsia: Are there age and racial differences? *PloS one*. 2014 22 Oct;9(10).
635. Chang SC, O'Brien KO, Nathanson MS, Mancini J, Witter FR. Hemoglobin concentrations influence birth outcomes in pregnant African-American adolescents. *The Journal of nutrition*. 2003 Jul;133(7):2348-55.
636. Chaparro A, Blanlot C, Ramirez V, Sanz A, Quintero A, Inostroza C, et al. *Porphyromonas gingivalis*, *Treponema denticola* and toll-like receptor 2 are associated with hypertensive disorders in placental tissue: a case-control study. *J Periodontal Res*. 2013 Dec;48(6):802-9.
637. Chaparro A, Sanz A, Quintero A, Inostroza C, Ramirez V, Carrion F, et al. Increased inflammatory biomarkers in early pregnancy is associated with the development of pre-eclampsia in patients with periodontitis: A case control study. *Journal of Periodontal Research*. 2013 June;48(3):302-7.
638. Chappell LC, Duckworth S, Seed PT, Griffin M, Myers J, Mackillop L, et al. Diagnostic accuracy of placental growth factor in women with suspected preeclampsia: a prospective multicenter study. *Circulation*. 2013 Nov 5;128(19):2121-31.
639. Chappell LC, Enye S, Seed P, Briley AL, Poston L, Shennan AH. Adverse perinatal outcomes and risk factors for preeclampsia in women with chronic hypertension: a prospective study. *Hypertension*. 2008 Apr;51(4):1002-9.
640. Chappell LC, Seed PT, Briley A, Kelly FJ, Hunt BJ, Charnock-Jones DS, et al. A longitudinal study of biochemical variables in women at risk of preeclampsia. *Am J Obstet Gynecol*. 2002 Jul;187(1):127-36.
641. Chappell LC, Seed PT, Kelly FJ, Briley A, Hunt BJ, Charnock-Jones DS, et al. Vitamin C and E supplementation in women at risk of preeclampsia is associated with changes in indices of oxidative stress and placental function. *American Journal of Obstetrics and Gynecology*. 2002 September;187(3):777-84.
642. Chasan-Taber L, Silveira M, Pekow P, Braun B, Manson JE, Solomon CG, et al. Physical activity, sedentary behavior and risk of hypertensive disorders of pregnancy in Hispanic women. *Hypertension in pregnancy*. 2015 01 Feb;34(1):1-16.
643. Chattopadhyay S, Das A, Pahari S. Fetomaternal outcome in severe preeclamptic women undergoing emergency cesarean section under either general or spinal anesthesia. *J Pregnancy*. 2014;2014:325098.
644. Chaudhary AH. Spinal anesthesia in preeclamptic parturients. *Pakistan Journal of Medical and Health Sciences*. 2012 July-September;6(3):653-6.
645. Chauhan SP, Magann EF, Velthuis S, Nunn SL, Reynolds D, Scardo JA, et al. Detection of fetal growth restriction in patients with chronic hypertension: is it feasible? *The journal of maternal-fetal &*

neonatal medicine : the official journal of the European Association of Perinatal Medicine, the Federation of Asia and Oceania Perinatal Societies, the International Society of Perinatal Obstet. 2003 Nov;14(5):324-8.

646. Chau-in W, Hintong T, Rodanant O, Lekprasert V, Punjasawadwong Y, Charuluxananan S, et al. Anesthesia-related complications of caesarean delivery in Thailand: 16,697 cases from the Thai Anaesthesia Incidents Study. *Journal of the Medical Association of Thailand = Chotmaihet thangphaet*. 2010 Nov;93(11):1274-83.

647. Chauleur C, Cochery-Nouvellon E, Mercier E, Aya G, Mares P, Mismetti P, et al. Analysis of the venous thromboembolic risk associated with severe postpartum haemorrhage in the NOHA First cohort. *Thrombosis and Haemostasis*. 2008 November;100(5):773-9.

648. Chauleur C, Galanaud JP, Alonso S, Cochery-Nouvellon E, Balducchi JP, Mares P, et al. Observational study of pregnant women with a previous spontaneous abortion before the 10th gestation week with and without antiphospholipid antibodies. *Journal of thrombosis and haemostasis : JTH*. 2010 Apr;8(4):699-706.

649. Chauleur C, Quenet S, Varlet MN, Seffert P, Laporte S, Decousus H, et al. Feasibility of an easy-to-use risk score in the prevention of venous thromboembolism and placental vascular complications in pregnant women: A prospective cohort of 2736 women. *Thrombosis Research*. 2008;122(4):478-84.

650. Chavarria ME, Lara-Gonzalez L, Garcia-Paleta Y, Vital-Reyes VS, Reyes A. Adhesion molecules changes at 20 gestation weeks in pregnancies complicated by preeclampsia. *European journal of obstetrics, gynecology, and reproductive biology*. 2008 Apr;137(2):157-64.

651. Chavarria ME, Lara-Gonzalez L, Gonzalez-Gleason A, Garcia-Paleta Y, Vital-Reyes VS, Reyes A. Prostacyclin/thromboxane early changes in pregnancies that are complicated by preeclampsia. *Am J Obstet Gynecol*. 2003 Apr;188(4):986-92.

652. Chavarria ME, Lara-Gonzalez L, Gonzalez-Gleason A, Sojo I, Reyes A. Maternal plasma cellular fibronectin concentrations in normal and preeclamptic pregnancies: a longitudinal study for early prediction of preeclampsia. *Am J Obstet Gynecol*. 2002 Sep;187(3):595-601.

653. Chavarro JE, Halldorsson TI, Leth T, Bysted A, Olsen SF. A prospective study of trans fat intake and risk of preeclampsia in Denmark. *Eur J Clin Nutr*. 2011 Aug;65(8):944-51.

654. Chaveeva P, Carbone IF, Syngelaki A, Akolekar R, Nicolaides KH. Contribution of method of conception on pregnancy outcome after the 11-13 weeks scan. *Fetal Diagn Ther*. 2011;30(1):9-22.

655. Chawla S, Nakra M, Mohan S, Nambiar BC, Agarwal R, Marwaha A. Why do obstetric patients go to the ICU? A 3-year-study. *Medical Journal Armed Forces India*. 2013 April;69(2):134-7.

656. Cheema S, Tariq S, Tipu TM, Yousaf F, Rashid M, Saeed T. Maternal mortality at lahore general hospital. *Pakistan Journal of Medical and Health Sciences*. 2012 January-March;6(1):118-20.

657. Chen CL, Cheng Y, Wang PH, Juang CM, Chiu LM, Yang MJ, et al. Review of pre-eclampsia in Taiwan: a multi-institutional study. *Zhonghua yi xue za zhi = Chinese medical journal; Free China ed*. 2000 Dec;63(12):869-75.

658. Chen CY, Kwek K, Tan KH, Yeo GS. Our experience with eclampsia in Singapore. *Singapore Med J*. 2003 Feb;44(2):88-93.

659. Chen HH, Lin HC, Yeh JC, Chen CP. Renal biopsy in pregnancies complicated by undetermined renal disease. *Acta Obstet Gynecol Scand*. 2001 Oct;80(10):888-93.

660. Chen HM, Chen SF, Chen YH, Lin HC. Increased risk of adverse pregnancy outcomes for women with migraines: A nationwide population-based study. *Cephalgia*. 2010 April;30(4):433-8.

661. Chen KC, Liou JD, Hung TH, Kuo DM, Hsu JJ, Hsieh CC, et al. Perinatal outcomes of polyhydramnios without associated congenital fetal anomalies after the gestational age of 20 weeks. *Chang Gung Med J*. 2005 Apr;28(4):222-8.

662. Chen Q, Shen F, Gao YF, Zhao M. An analysis of expectant management in women with

- early-onset preeclampsia in China. *Journal of human hypertension*. 2015 08 Jun;29(6):379-84.
663. Chen X, Scholl TO. Association of elevated free fatty acids during late pregnancy with preterm delivery. *Obstet Gynecol*. 2008 Aug;112(2 Pt 1):297-303.
664. Chen X, Scholl TO. Maternal biomarkers of endothelial dysfunction and preterm delivery. *PLoS one*. 2014;9(1):e85716.
665. Chen XK, Wen SW, Bottomley J, Smith GN, Leader A, Walker MC. In vitro fertilization is associated with an increased risk for preeclampsia. *Hypertension in pregnancy*. 2009 Feb;28(1):1-12.
666. Chen Y, Xun D, Wang YC, Wang B, Geng SH, Chen H, et al. Incidence and risk factors of retinopathy of prematurity in two neonatal intensive care units in North and South China. *Chinese medical journal*. 2015 05 Apr;128(7):914-8.
667. Chen YP, Pfab T, Slowinski T, Richter CM, Godes M, Hocher B. Impact of genetic variation of tumor necrosis factor-alpha on gestational hypertension. *Chinese medical journal*. 2006 May 5;119(9):719-24.
668. Chen YY, Wu ML, Kao MH, Su TH, Chen CP. Perinatal outcome of recurrent pre-eclampsia versus pre-eclampsia in nulliparas. *The journal of obstetrics and gynaecology research*. 2009 Dec;35(6):1042-6.
669. Cheng SW, Chou HC, Tsou KI, Fang LJ, Tsao PN. Delivery before 32 weeks of gestation for maternal pre-eclampsia: neonatal outcome and 2-year developmental outcome. *Early Hum Dev*. 2004 Jan;76(1):39-46.
670. Cheng YW, McLaughlin GB, Esakoff TF, Block-Kurbisch I, Caughey AB. Glucose challenge test: screening threshold for gestational diabetes mellitus and associated outcomes. *The journal of maternal-fetal & neonatal medicine : the official journal of the European Association of Perinatal Medicine, the Federation of Asia and Oceania Perinatal Societies, the International Society of Perinatal Obstet*. 2007 Dec;20(12):903-8.
671. Cheong JLY, Cowan FM. Neonatal arterial ischaemic stroke: obstetric issues. *Seminars in Fetal and Neonatal Medicine*. 2009 October;14(5):267-71.
672. Cheung CW, Leung TY, Sahota DS, Chan OK, Chan LW, Fung TY, et al. Outcome of induction of labour using maternal characteristics, ultrasound assessment and biochemical state of the cervix. *Journal of Maternal-Fetal and Neonatal Medicine*. 2010 December;23(12):1406-12.
673. Chevalier N, Letur H, Lelannou D, Ohl J, Cornet D, Chalas-Boissonnas C, et al. Materno-fetal cardiovascular complications in Turner syndrome after oocyte donation: insufficient prepregnancy screening and pregnancy follow-up are associated with poor outcome. *The Journal of clinical endocrinology and metabolism*. 2011 Feb;96(2):E260-7.
674. Chhabra S, Kakani A. Maternal mortality due to eclamptic and non-eclamptic hypertensive disorders: a challenge. *Journal of obstetrics and gynaecology : the journal of the Institute of Obstetrics and Gynaecology*. 2007 Jan;27(1):25-9.
675. Chhabra S, Tyagi S, Bhavani M, Gosawi M. Late postpartum eclampsia. *Journal of obstetrics and gynaecology : the journal of the Institute of Obstetrics and Gynaecology*. 2012 Apr;32(3):264-6.
676. Chiabi A, Nguetack S, Mah E, Nodem S, Mbuagbaw L, Mbonda E, et al. Risk factors for birth asphyxia in an urban health facility in Cameroon. *Iranian Journal of Child Neurology*. 2013;7(3):46-54.
677. Chiaffarino F, Parazzini F, Paladini D, Acaia B, Ossola W, Marozio L, et al. A small randomised trial of low-dose aspirin in women at high risk of pre-eclampsia. *European journal of obstetrics, gynecology, and reproductive biology*. 2004 Feb 10;112(2):142-4.
678. Chibber R. Child-bearing beyond age 50: pregnancy outcome in 59 cases "a concern?". *Arch Gynecol Obstet*. 2005 Mar;271(3):189-94.
679. Chibber R, Al-Hijji J, Al-Adwani AR, Rammah A, Fouda M, Al-Saleh E, et al. Trends in maternal mortality over 29 years in a Kuwait Tertiary Teaching Hospital: Signs of progress. *Journal of Maternal-Fetal and Neonatal Medicine*. 2012 September;25(9):1557-63.
680. Chibber R, Fouda M, Al-Hijji J, Al-Dossary M, Sadeq EH, Amen A, et al. Adverse pregnancy



- outcome among teenagers: A reality? *Journal of Obstetrics and Gynaecology*. 2014 May;34(4):297-300.
681. Chibber R, Fouda M, Shishtawy W, Al-Dossary M, Al-Hijji J, Amen A, et al. Maternal and neonatal outcome in triplet, quadruplet and quintuplet gestations following ART: a 11-year study. *Arch Gynecol Obstet*. 2013 Oct;288(4):759-67.
682. Chigbu CO, Okezie OA, Odugu BU. Women in southern Nigeria with change in paternity do not have increased incidence of pre-eclampsia. *Journal of obstetrics and gynaecology : the journal of the Institute of Obstetrics and Gynaecology*. 2009 Feb;29(2):94-7.
683. Chikosi AB, Moodley J, Pegoraro RJ, Lanning PA, Rom L. Apolipoprotein E polymorphism in South African Zulu women with preeclampsia. *Hypertension in pregnancy*. 2000;19(3):309-14.
684. Ching T, Song MA, Tiirikainen M, Molnar J, Berry M, Towner D, et al. Genome-wide hypermethylation coupled with promoter hypomethylation in the chorioamniotic membranes of early onset pre-eclampsia. *Mol Hum Reprod*. 2014 Sep;20(9):885-904.
685. Chitayat D, Farrell SA, Huang T, Meier C, Wyatt PR, Summers AM. Double-positive maternal serum screening results for down syndrome and open neural tube defects: An indicator for fetal structural or chromosomal abnormalities and adverse obstetric outcomes. *Am J Obstet Gynecol*. 2002 Sep;187(3):758-63.
686. Chitra TV, Panicker S. Maternal and fetal outcome of dengue fever in pregnancy. *J Vector Borne Dis*. 2011 Dec;48(4):210-3.
687. Ch'ng CL, Morgan M, Hainsworth I, Kingham JG. Prospective study of liver dysfunction in pregnancy in Southwest Wales. *Gut*. 2002 Dec;51(6):876-80.
688. Choi CJ, Knutsen R, Oda K, Fraser GE, Knutsen SF. The association between incident self-reported fibromyalgia and nonpsychiatric factors: 25-years follow-up of the adventist health study. *Journal of Pain*. 2010 October;11(10):994-1003.
689. Choi HS, Choi H, Han S, Kim HS, Lee C, Kim YY, et al. Pulmonary edema during pregnancy: unilateral presentation is not rare. *Circulation journal : official journal of the Japanese Circulation Society*. 2002 Jul;66(7):623-6.
690. Choi SY, Yun J, Lee OJ, Han HS, Yeo MK, Lee MA, et al. MicroRNA expression profiles in placenta with severe preeclampsia using a PNA-based microarray. *Placenta*. 2013 Sep;34(9):799-804.
691. Chong JH, Wee CK, Ho SK, Chan DK. Factors associated with hypospadias in Asian newborn babies. *J Perinat Med*. 2006;34(6):497-500.
692. Choo MM, Martin FJ, Theam LC, C UT. Retinopathy of prematurity in extremely low birth weight infants in Malaysia. *Journal of AAPOS*. 2009 October;13(5):446-9.
693. Chow EJ, Kamineni A, Daling JR, Fraser A, Wiggins CL, Mineau GP, et al. Reproductive outcomes in male childhood cancer survivors: a linked cancer-birth registry analysis. *Archives of pediatrics & adolescent medicine*. 2009 Oct;163(10):887-94.
694. Chowdhary M, Akabbani A, Tobey D, Hope TD. Posterior reversible encephalopathy syndrome in a woman with focal segmental glomerulosclerosis. *Neuropsychiatric Disease and Treatment*. 2015 21 Apr;11:1111-4.
695. Christian P, Katz J, Wu L, Kimbrough-Pradhan E, Khatry SK, LeClerq SC, et al. Risk factors for pregnancy-related mortality: a prospective study in rural Nepal. *Public Health*. 2008 Feb;122(2):161-72.
696. Christiansen LR, Collins KA. Pregnancy-associated deaths: a 15-year retrospective study and overall review of maternal pathophysiology. *The American journal of forensic medicine and pathology*. 2006 Mar;27(1):11-9.
697. Chu K, Cortier H, Maldonado F, Mashant T, Ford N, Trelles M. Cesarean section rates and indications in sub-Saharan Africa: a multi-country study from Medecins sans Frontieres. *PloS one*. 2012;7(9):e44484.
698. Chung JH, Melsop KA, Gilbert WM, Caughey AB, Walker CK, Main EK. Increasing pre-pregnancy body mass index is predictive of a progressive escalation in adverse pregnancy outcomes. *The journal of*

maternal-fetal & neonatal medicine : the official journal of the European Association of Perinatal Medicine, the Federation of Asia and Oceania Perinatal Societies, the International Society of Perinatal Obstet. 2012 Sep;25(9):1635-9.

699. Chung L, Flyckt RL, Colon I, Shah AA, Druzin M, Chakravarty EF. Outcome of pregnancies complicated by systemic sclerosis and mixed connective tissue disease. *Lupus*. 2006;15(9):595-9.
700. Chung SD, Chen YH, Keller JJ, Lin CC, Lin HC. Urinary calculi increase the risk for adverse pregnancy outcomes: a nationwide study. *Acta Obstet Gynecol Scand*. 2013 Jan;92(1):69-74.
701. Ciarmela P, Boschi S, Bloise E, Marozio L, Benedetto C, Castellucci M, et al. Polymorphisms of FAS and FAS ligand genes in preeclamptic women. *European Journal of Obstetrics Gynecology and Reproductive Biology*. 2010 February;148(2):144-6.
702. Claas MJ, de Vries LS, Bruinse HW. Maternal characteristics of a cohort of preterm infants with a birth weight  $\leq$ 750 g without major structural anomalies and chromosomal abnormalities. *Am J Perinatol*. 2011 May;28(5):367-76.
703. Clark CA, Davidovits J, Spitzer KA, Laskin CA. The lupus anticoagulant: Results from 2257 patients attending a high-risk pregnancy clinic. *Blood*. 2013 18 Jul;122(3):341-7.
704. Clark EA, Silver RM, Branch DW. Do antiphospholipid antibodies cause preeclampsia and HELLP syndrome? *Current rheumatology reports*. 2007 Jun;9(3):219-25.
705. Clark P, Sattar N, Walker ID, Greer IA. The Glasgow Outcome, APCR and Lipid (GOAL) Pregnancy Study: significance of pregnancy associated activated protein C resistance. *Thromb Haemost*. 2001 Jan;85(1):30-5.
706. Clark P, Walker ID, Govan L, Wu O, Greer IA. The GOAL study: a prospective examination of the impact of factor V Leiden and ABO(H) blood groups on haemorrhagic and thrombotic pregnancy outcomes. *Br J Haematol*. 2008 Jan;140(2):236-40.
707. Clark P, Wu O. ABO(H) blood groups and pre-eclampsia. A systematic review and meta-analysis. *Thromb Haemost*. 2008 Sep;100(3):469-74.
708. Clark SL, Belfort MA, Dildy GA, Herbst MA, Meyers JA, Hankins GD. Maternal death in the 21st century: causes, prevention, and relationship to cesarean delivery. *Am J Obstet Gynecol*. 2008 Jul;199(1):36.e1-5; discussion 91-2. e7-11.
709. Clark SL, Christmas JT, Frye DR, Meyers JA, Perlin JB. Maternal mortality in the United States: predictability and the impact of protocols on fatal postcesarean pulmonary embolism and hypertension-related intracranial hemorrhage. *Am J Obstet Gynecol*. 2014 Jul;211(1):32.e1-9.
710. Clausen T, Djurovic S, Henriksen T. Dyslipidemia in early second trimester is mainly a feature of women with early onset pre-eclampsia. *Bjog*. 2001 Oct;108(10):1081-7.
711. Clausen T, Djurovic S, Reseland JE, Berg K, Drevon CA, Henriksen T. Altered plasma concentrations of leptin, transforming growth factor-beta(1) and plasminogen activator inhibitor type 2 at 18 weeks of gestation in women destined to develop pre-eclampsia. Circulating markers of disturbed placentation? *Placenta*. 2002 May;23(5):380-5.
712. Clausen T, Oyen N, Henriksen T. Pregnancy complications by overweight and residential area. A prospective study of an urban Norwegian cohort. *Acta Obstet Gynecol Scand*. 2006;85(5):526-33.
713. Clausen T, Slott M, Solvoll K, Drevon CA, Vollset SE, Henriksen T. High intake of energy, sucrose, and polyunsaturated fatty acids is associated with increased risk of preeclampsia. *Am J Obstet Gynecol*. 2001 Aug;185(2):451-8.
714. Clowse ME, Wallace DJ, Weisman M, James A, Criscione-Schreiber LG, Pisetsky DS. Predictors of preterm birth in patients with mild systemic lupus erythematosus. *Ann Rheum Dis*. 2013 Sep 1;72(9):1536-9.
715. Cnattingius S, Reilly M, Pawitan Y, Lichtenstein P. Maternal and fetal genetic factors account for most of familial aggregation of preeclampsia: a population-based Swedish cohort study. *American journal of medical genetics Part A*. 2004 Nov 1;130a(4):365-71.

716. Cochery-Nouvellon E, Mercier E, Lissalde-Lavigne G, Daures JP, Quere I, Dauzat M, et al. Homozygosity for the C46T polymorphism of the F12 gene is a risk factor for venous thrombosis during the first pregnancy. *Journal of thrombosis and haemostasis : JTH*. 2007 Apr;5(4):700-7.
717. Coffeng SM, Blaauw J, Souwer ET, Rakhorst G, Smit AJ, Graaff R, et al. Skin autofluorescence as marker of tissue advanced glycation end-products accumulation in formerly preeclamptic women. *Hypertension in pregnancy*. 2011;30(2):231-42.
718. Coghill AE, Hansen S, Littman AJ. Risk factors for eclampsia: a population-based study in Washington State, 1987-2007. *Am J Obstet Gynecol*. 2011 Dec;205(6):553.e1-7.
719. Coghill AE, Hansen S, Littman AJ. Risk factors for eclampsia: A population-based study in Washington State, 1987-2007. *American Journal of Obstetrics and Gynecology*. 2011 December;205(6):553.e1-.e7.
720. Cohen GR, Curet LB, Levine RJ, Ewell MG, Morris CD, Catalano PM, et al. Ethnicity, nutrition, and birth outcomes in nulliparous women. *Am J Obstet Gynecol*. 2001 Sep;185(3):660-7.
721. Cohen J, Vaiman D, Sibai BM, Haddad B. Blood pressure changes during the first stage of labor and for the prediction of early postpartum preeclampsia: A prospective study. *European Journal of Obstetrics Gynecology and Reproductive Biology*. 2015 01 Jan;184:103-7.
722. Cohen JL, Smilen KE, Bianco AT, Moshier EL, Ferrara LA, J LS. Predictive value of combined serum biomarkers for adverse pregnancy outcomes. *European Journal of Obstetrics Gynecology and Reproductive Biology*. 2014 01 Oct;181:89-94.
723. Cohen SB, Elizur SE, Goldenberg M, Beiner M, Novikov I, Mashiach S, et al. Outcome of twin pregnancies with extreme weight discordancy. *Am J Perinatol*. 2001 Dec;18(8):427-32.
724. Cohn BA, Cirillo PM, Christianson RE, Van Den Berg BJ, Siiteri PK. Placental characteristics and reduced risk of maternal breast cancer. *Journal of the National Cancer Institute*. 2001 01 Aug;93(15):1133-40.
725. Colatrella A, Braucci S, Festa C, Bianchi P, Fallucca F, Mattei L, et al. Hypertensive disorders in normal/over-weight and obese type 2 diabetic pregnant women. *Experimental and clinical endocrinology & diabetes : official journal, German Society of Endocrinology [and] German Diabetes Association*. 2009 Sep;117(8):373-7.
726. Coleman MA, McCowan LM, North RA. Mid-trimester uterine artery Doppler screening as a predictor of adverse pregnancy outcome in high-risk women. *Ultrasound Obstet Gynecol*. 2000 Jan;15(1):7-12.
727. Conde-Agudelo A, Belizan JM. Maternal morbidity and mortality associated with interpregnancy interval: cross sectional study. *Bmj*. 2000 Nov 18;321(7271):1255-9.
728. Conde-Agudelo A, Belizan JM. Risk factors for pre-eclampsia in a large cohort of Latin American and Caribbean women. *Bjog*. 2000 Jan;107(1):75-83.
729. Conde-Agudelo A, Belizan JM, Diaz-Rossello JL. Epidemiology of fetal death in Latin America. *Acta Obstet Gynecol Scand*. 2000 May;79(5):371-8.
730. Conde-Agudelo A, Villar J, Lindheimer M. Maternal infection and risk of preeclampsia: systematic review and metaanalysis. *Am J Obstet Gynecol*. 2008 Jan;198(1):7-22.
731. Conlin AM, Bukowinski AT, Sevick CJ, DeScisciolo C, Crum-Cianflone NF. Safety of the pandemic H1N1 influenza vaccine among pregnant U.S. military women and their newborns. *Obstet Gynecol*. 2013 Mar;121(3):511-8.
732. Connell LE, Salihu HM, Salemi JL, August EM, Weldeselasse H, Mbah AK. Maternal hepatitis B and hepatitis C carrier status and perinatal outcomes. *Liver International*. 2011 September;31(8):1163-70.
733. Connelly EA, Viera M, Price C, Waner M. Segmental hemangioma of infancy complicated by life-threatening arterial bleed. *Pediatric Dermatology*. 2009 July-August;26(4):469-72.
734. Connolly G, Razak AR, Hayanga A, Russell A, McKenna P, McNicholas WT. Inspiratory flow

limitation during sleep in pre-eclampsia: comparison with normal pregnant and nonpregnant women. *The European respiratory journal*. 2001 Oct;18(4):672-6.

735. Conserva V, Muggiasca M, Arrigoni L, Mantegazza V, Rossi E, Ferrazzi E. Recurrence and severity of abnormal pregnancy outcome in patients treated by low-molecular-weight heparin: a prospective pilot study. *The journal of maternal-fetal & neonatal medicine : the official journal of the European Association of Perinatal Medicine, the Federation of Asia and Oceania Perinatal Societies, the International Society of Perinatal Obstet*. 2012 Aug;25(8):1467-73.

736. Contreras KR, Kominiarek MA, Zollinger TW. The impact of tobacco smoking on perinatal outcome among patients with gestational diabetes. *Journal of perinatology : official journal of the California Perinatal Association*. 2010 May;30(5):319-23.

737. Contro E, Maroni E, Cera E, Youssef A, Bellussi F, Pilu G, et al. Unilaterally increased uterine artery resistance, placental location and pregnancy outcome. *European Journal of Obstetrics Gynecology and Reproductive Biology*. 2010 December;153(2):143-7.

738. Cooley SM, Donnelly JC, Geary MP, Rodeck CH, Hindmarsh PC. Maternal insulin-like growth factors 1 and 2 (IGF-1, IGF-2) and IGF BP-3 and the hypertensive disorders of pregnancy. *The journal of maternal-fetal & neonatal medicine : the official journal of the European Association of Perinatal Medicine, the Federation of Asia and Oceania Perinatal Societies, the International Society of Perinatal Obstet*. 2010 Jul;23(7):658-61.

739. Cooley SM, Donnelly JC, Walsh T, MacMahon C, Gillan J, Geary MP. The impact of umbilical and uterine artery Doppler indices on antenatal course, labor and delivery in a low-risk primigravid population. *J Perinat Med*. 2011 Mar;39(2):143-9.

740. Cooley SM, Donnelly JC, Walsh T, McMahon C, Gillan J, Geary MP. The impact of ultrasonographic placental architecture on antenatal course, labor and delivery in a low-risk primigravid population. *The journal of maternal-fetal & neonatal medicine : the official journal of the European Association of Perinatal Medicine, the Federation of Asia and Oceania Perinatal Societies, the International Society of Perinatal Obstet*. 2011 Mar;24(3):493-7.

741. Coolman M, de Groot CJ, Jaddoe VW, Hofman A, Raat H, Steegers EA. Medical record validation of maternally reported history of preeclampsia. *J Clin Epidemiol*. 2010 Aug;63(8):932-7.

742. Coolman M, Timmermans S, de Groot CJ, Russcher H, Lindemans J, Hofman A, et al. Angiogenic and fibrinolytic factors in blood during the first half of pregnancy and adverse pregnancy outcomes. *Obstet Gynecol*. 2012 Jun;119(6):1190-200.

743. Cooper S, Lewis S, Thornton JG, Marlow N, Watts K, Britton J, et al. The SNAP trial: A randomised placebo-controlled trial of nicotine replacement therapy in pregnancy - Clinical effectiveness and safety until 2 years after delivery, with economic evaluation. *Health Technology Assessment*. 2014;18(54):1-128.

744. Cooray SD, Edmonds SM, Tong S, Samarasekera SP, Whitehead CL. Characterization of symptoms immediately preceding eclampsia. *Obstet Gynecol*. 2011 Nov;118(5):995-9.

745. Coppage KH, Polzin WJ. Severe preeclampsia and delivery outcomes: is immediate cesarean delivery beneficial? *Am J Obstet Gynecol*. 2002 May;186(5):921-3.

746. Cordero L, Timan CJ, Waters HH, Sachs LA. Mean arterial pressures during the first 24 hours of life in < or = 600-gram birth weight infants. *Journal of perinatology : official journal of the California Perinatal Association*. 2002 Jul-Aug;22(5):348-53.

747. Cordero L, Timan CJ, Waters HH, Sachs LA. Mean arterial pressures during the first 24 hours of life in <600-gram birth weight infants. *Journal of Perinatology*. 2002;22(5):348-53.

748. Cordero L, Valentine CJ, Samuels P, Giannone PJ, Nankervis CA. Breastfeeding in women with severe preeclampsia. *Breastfeeding medicine : the official journal of the Academy of Breastfeeding Medicine*. 2012 Dec;7(6):457-63.

749. Cordoba O, Llurba E, Saura C, Rubio I, Ferrer Q, Cortes J, et al. Multidisciplinary approach to

- breast cancer diagnosed during pregnancy: maternal and neonatal outcomes. *Breast (Edinburgh, Scotland)*. 2013 Aug;22(4):515-9.
750. Coronado PJ, Fasero M, Alvarez-Sanchez A, Rey E. Prevalence and persistence of nausea and vomiting along the pregnancy. *Revista Espanola de Enfermedades Digestivas*. 2014 01 May;106(5):318-24.
751. Correa RR, Guimaraes CS, Rocha LP, Pucci KR, Claudino N, Ramos AV, et al. Influence of inflammatory infiltrate and alterations of the blood flow in the etiopathogenesis of the basement membrane of the amniotic epithelium (BMAE) thickening in patients with hypertensive syndromes in pregnancy. *Arch Gynecol Obstet*. 2012 Nov;286(5):1117-21.
752. Cortet M, Maucourt-Boulch D, Deneux-Tharoux C, Dupont C, Rudigoz RC, Roy P, et al. Severity of post-partum hemorrhage after vaginal delivery is not predictable from clinical variables available at the time post-partum hemorrhage is diagnosed. *Journal of Obstetrics and Gynaecology Research*. 2015 01 Feb;41(2):199-206.
753. Cosson E, Benbara A, Pharisien I, Nguyen MT, Revaux A, Lormeau B, et al. Diagnostic and prognostic performances over 9 years of a selective screening strategy for gestational diabetes mellitus in a cohort of 18,775 subjects. *Diabetes Care*. 2013 March;36(3):598-603.
754. Cosson E, Cussac-Pillegand C, Benbara A, Pharisien I, Jaber Y, Banu I, et al. The diagnostic and prognostic performance of a selective screening strategy for gestational diabetes mellitus according to ethnicity in Europe. *Journal of Clinical Endocrinology and Metabolism*. 2014 March;99(3):996-1005.
755. Costa A, Policiano C, Clode N, Graca LM. Indications for cesarean deliveries during a 7-year period in a tertiary hospital  
Indicacoes para cesarianas num hospital terciario durante sete anos. *Acta Medica Portuguesa*. 2013 November-December;26(6):649-54.
756. Costa SL, Proctor L, Dodd JM, Toal M, Okun N, Johnson JA, et al. Screening for placental insufficiency in high-risk pregnancies: is earlier better? *Placenta*. 2008 Dec;29(12):1034-40.
757. Costa VMF, Viana MB, Aguiar RALP. Pregnancy in patients with sickle cell disease: Maternal and perinatal outcomes. *Journal of Maternal-Fetal and Neonatal Medicine*. 2015 01 Apr;28(6):685-9.
758. Cotechini T, Hopman WJ, Graham CH. Inflammation-induced fetal growth restriction in rats is associated with altered placental morphometrics. *Placenta*. 2014 August;35(8):575-81.
759. Cotter AM, Molloy AM, Scott JM, Daly SF. Elevated plasma homocysteine in early pregnancy: a risk factor for the development of severe preeclampsia. *Am J Obstet Gynecol*. 2001 Oct;185(4):781-5.
760. Cowan AD, Miller ES, Grobman WA. Subsequent pregnancy outcome after B-lynch suture placement. *Obstet Gynecol*. 2014 Sep;124(3):558-61.
761. Cozzi V, Garlanda C, Nebuloni M, Maina V, Martinelli A, Calabrese S, et al. PTX3 as a potential endothelial dysfunction biomarker for severity of preeclampsia and IUGR. *Placenta*. 2012 Dec;33(12):1039-44.
762. Craici IM, Wagner SJ, Bailey KR, Fitz-Gibbon PD, Wood-Wentz CM, Turner ST, et al. Podocyturia predates proteinuria and clinical features of preeclampsia: longitudinal prospective study. *Hypertension*. 2013 Jun;61(6):1289-96.
763. Crane JM, Murphy P, Burrage L, Hutchens D. Maternal and perinatal outcomes of extreme obesity in pregnancy. *Journal of obstetrics and gynaecology Canada : JOGC = Journal d'obstetrique et gynecologie du Canada : JOGC*. 2013 Jul;35(7):606-11.
764. Crane JM, White J, Murphy P, Burrage L, Hutchens D. The effect of gestational weight gain by body mass index on maternal and neonatal outcomes. *Journal of obstetrics and gynaecology Canada : JOGC = Journal d'obstetrique et gynecologie du Canada : JOGC*. 2009 Jan;31(1):28-35.
765. Crawford KE, Stevenson JL, Wlodek ME, Gude NM. No change in calreticulin with fetal growth restriction in human and rat pregnancies. *Placenta*. 2013 Nov;34(11):1066-71.
766. Creatsas G, Elsheikh A. Adolescent pregnancy and its consequences. *The European journal of*

contraception & reproductive health care : the official journal of the European Society of Contraception. 2002 Sep;7(3):167-72.

767. Cripe SM, Frederick IO, Qiu C, Williams MA. Risk of preterm delivery and hypertensive disorders of pregnancy in relation to maternal co-morbid mood and migraine disorders during pregnancy.

Paediatric and perinatal epidemiology. 2011 Mar;25(2):116-23.

768. Crippa I, Locatelli A, Consonni S, Ghidini A, Stoppa P, Paterlini G, et al. Infants weighing <1500 g: better born too small or too soon? Am J Perinatol. 2012 Oct;29(9):693-8.

769. Critchfield AS, Paulus JK, Farez R, Urato AC. Abnormal analyte preeclampsia: do the second-trimester maternal serum analytes help differentiate preeclampsia subtypes? Journal of perinatology : official journal of the California Perinatal Association. 2013 Oct;33(10):754-8.

770. Croft ML, Morgan V, Read AW, Jablensky AS. Recorded pregnancy histories of the mothers of singletons and the mothers of twins: A longitudinal comparison. Twin Research and Human Genetics. 2010 December;13(6):595-603.

771. Crovetto F, Borsa N, Acaia B, Nishimura C, Frees K, Smith RJ, et al. The genetics of the alternative pathway of complement in the pathogenesis of HELLP syndrome. The journal of maternal-fetal & neonatal medicine : the official journal of the European Association of Perinatal Medicine, the Federation of Asia and Oceania Perinatal Societies, the International Society of Perinatal Obstet. 2012 Nov;25(11):2322-5.

772. Crovetto F, Figueras F, Triunfo S, Crispi F, Rodriguez-Sureda V, Dominguez C, et al. First trimester screening for early and late preeclampsia based on maternal characteristics, biophysical parameters, and angiogenic factors. Prenatal diagnosis. 2015 01 Feb;35(2):183-91.

773. Crovetto F, Figueras F, Triunfo S, Crispi F, Rodriguez-Sureda V, Peguero A, et al. Added value of angiogenic factors for the prediction of early and late preeclampsia in the first trimester of pregnancy. Fetal Diagn Ther. 2014;35(4):258-66.

774. Crovetto F, Ossola MW, Spadaccini G, Duiella SF, Somigliana E, Fedele L. Ischemic stroke recurrence during pregnancy: a case series and a review of the literature. Arch Gynecol Obstet. 2012 Sep;286(3):599-604.

775. Cruz MO, Gao W, Hibbard JU. Obstetrical and perinatal outcomes among women with gestational hypertension, mild preeclampsia, and mild chronic hypertension. Am J Obstet Gynecol. 2011 Sep;205(3):260.e1-9.

776. Cruz-Lemini M, Crispi F, Valenzuela-Alcaraz B, Figueras F, Gomez O, Sitges M, et al. A fetal cardiovascular score to predict infant hypertension and arterial remodeling in intrauterine growth restriction. American Journal of Obstetrics and Gynecology. 2014 June;210(6):552.e1-.e22.

777. Csaky-Szunyogh M, Vereczkey A, Kosa Z, Gerencser B, Czeizel AE. Risk factors in the origin of congenital left-ventricular outflow-tract obstruction defects of the heart: A population-based case-control study. Pediatric Cardiology. 2014 January;35(1):108-20.

778. Cuckle HS. Screening for pre-eclampsia-lessons from aneuploidy screening. Placenta. 2011 February;32(SUPPL. 1):S42-S8.

779. Cullinan N, Gorman KM, Riordan M, Waldron M, Goodship THJ, Awan A. Case report: Benefits and challenges of long-term eculizumab in atypical hemolytic uremic syndrome. Pediatrics. 2015 01 Jun;135(6):e1506-e9.

780. Cundy T, Slee F, Gamble G, Neale L. Hypertensive disorders of pregnancy in women with Type 1 and Type 2 diabetes. Diabetic medicine : a journal of the British Diabetic Association. 2002 Jun;19(6):482-9.

781. Curnow KM, Pham T, August P. The L10F mutation of angiotensinogen is rare in pre-eclampsia. J Hypertens. 2000 Feb;18(2):173-8.

782. Currie L, Peek M, McNiven M, Prosser I, Mansour J, Ridgway J. Is there an increased maternal-infant prevalence of Factor V Leiden in association with severe pre-eclampsia? Bjog. 2002

Feb;109(2):191-6.

783. Curry RA, Fletcher C, Gelson E, Gatzoulis MA, Woolnough M, Richards N, et al. Pulmonary hypertension and pregnancy--a review of 12 pregnancies in nine women. *Bjog*. 2012 May;119(6):752-61.

784. Cusimano MC, Pudwell J, Roddy M, Cho CKJ, Smith GN. The maternal health clinic: An initiative for cardiovascular risk identification in women with pregnancy-related complications. *American Journal of Obstetrics and Gynecology*. 2014 May;210(5):438.e1-.e9.

785. Czerwinski S, Gollero J, Qiu C, Sorensen TK, Williams MA. Migraine-asthma comorbidity and risk of hypertensive disorders of pregnancy. *J Pregnancy*. 2012;2012:858097.

786. Da Ros Wendland EM, Duncan BB, Belizan JM, Vigo A, Schmidt MI. Gestational diabetes and pre-eclampsia: Common antecedents? *Arquivos Brasileiros de Endocrinologia e Metabologia*. 2008 August;52(6):975-84.

787. da Silva CF, Leite AJM, de Almeida NMGS, de Leon ACMP, Olofin I, Perinatal RNNS, et al. Factors associated with neonatal death in high-risk infants: A multicenter study in High-Risk Neonatal Units in Northeast Brazil

Fatores associados ao obito neonatal de recém-nascidos de alto risco: Estudo multicentrico em Unidades Neonatais de Alto Risco no Nordeste brasileiro. *Cadernos de Saude Publica*. 2014 February;30(2):355-68.

788. Dabirioskoei A, Mazloomzade S, Amirmoghadam HR, Akbarshahi A, Eskandari M. Comparison of the serum leptin levels in pregnant women with preeclampsia and those with normal blood pressure whom were referred to the vali-e-asr hospital of Zanjan, Iran. *Journal of Zanjan University of Medical Sciences and Health Services*. 2011;19(77):8.

789. Dadhich S, Agrawal S, Soni M, Choudhary R, Jain R, Sharma S, et al. Predictive value of platelet indices in development of preeclampsia. *Journal of SAFOG*. 2012;4(1):17-21.

790. Dadhwal V, Sharma AK, Deka D, Gupta B, Mittal S. The obstetric outcome following treatment in a cohort of patients with antiphospholipid antibody syndrome in a tertiary care center. *J Postgrad Med*. 2011 Jan-Mar;57(1):16-9.

791. Dadkhah F, Kashanian M, Eliasi G. A comparison between the pregnancy outcome in women both with or without threatened abortion. *Early Hum Dev*. 2010 Mar;86(3):193-6.

792. Dadvand P, Basagana X, Figueras F, Amoly E, Tobias A, de Nazelle A, et al. Saharan dust episodes and pregnancy. *Journal of environmental monitoring : JEM*. 2011 Nov;13(11):3222-8.

793. Dadvand P, Ostro B, Amato F, Figueras F, Minguillon MC, Martinez D, et al. Particulate air pollution and preeclampsia: A source-based analysis. *Occupational and Environmental Medicine*. 2014 August;71(8):570-7.

794. Dafallah SE, Babikir HE. Risk factors predisposing to abruptio placentae. *Maternal and fetal outcome. Saudi medical journal*. 2004 Sep;25(9):1237-40.

795. Dagdeviren H, Cankaya A, Cengiz H, Tombul T, Kanawati A, Caypinar SS, et al. Maternal and neonatal outcomes of women with preeclampsia and eclampsia at a tertiary care center  
Tersiyer Bir Merkezdeki Eklampsi ve Preeklampsi Olgularinin Anne ve Bebek Sonuclari. *Haseki Tip Bulteni*. 2015 01 Jun;53(2):143-6.

796. Dahlstrom B, Ellstrom Engh M, Bukholm G, Oian P. Changes in the prevalence of pre-eclampsia in Akershus County and the rest of Norway during the past 35 years. *Acta Obstetrica et Gynecologica Scandinavica*. 2006 01 Jul;85(8):916-21.

797. Dahm PL, Blomquist S, De Robertis E, Jonson B, Myhre E, Svantesson C, et al. Effects of NO inhalation on pulmonary leukocyte sequestration and blood volume in porcine endotoxaemia. *Intensive care medicine*. 2000 Mar;26(3):336-43.

798. Daigavane MM, Jena RK, Kar TJ. Perinatal outcome in sickle cell anemia: a prospective study from India. *Hemoglobin*. 2013;37(6):507-15.

799. Dalamaga M, Srinivas SK, Elovitz MA, Chamberland J, Mantzoros CS. Serum adiponectin and

leptin in relation to risk for preeclampsia: results from a large case-control study. *Metabolism*. 2011 Nov;60(11):1539-44.

800. Dalmaz CA, dos Santos KG, Botton MR, Roisenberg I. Risk factors for hypertensive disorders of pregnancy in Southern Brazil  
Fatores de risco para distúrbios hipertensivos durante a gravidez no Sul do Brasil. *Revista da Associação Médica Brasileira*. 2011 November / December;57(6):692-6.
801. Dalmaz CA, Santos KG, Botton MR, Roisenberg I. Risk factors for hypertensive disorders of pregnancy in southern Brazil. *Revista da Associação Médica Brasileira* (1992). 2011 Nov-Dec;57(6):692-6.
802. Dalmaz CA, Santos KG, Botton MR, Tedoldi CL, Roisenberg I. Relationship between polymorphisms in thrombophilic genes and preeclampsia in a Brazilian population. *Blood cells, molecules & diseases*. 2006 Sep-Oct;37(2):107-10.
803. D'Aloisio AA, Deroo LA, Baird DD, Weinberg CR, Sandler DP. Prenatal and infant exposures and age at menarche. *Epidemiology (Cambridge, Mass)*. 2013 March;24(2):277-84.
804. Daltveit AK, Tollanes MC, Pihlstrom H, Irgens LM. Cesarean delivery and subsequent pregnancies. *Obstetrics and Gynecology*. 2008 June;111(6):1327-34.
805. Dammann O, Drescher J, Veelken N. Maternal fever at birth and non-verbal intelligence at age 9 years in preterm infants. *Dev Med Child Neurol*. 2003 Mar;45(3):148-51.
806. Dane C, Buyukasik H, Dane B, Yayla M. Maternal plasma fibronectin and advanced oxidative protein products for the prediction of preeclampsia in high risk pregnancies: A prospective cohort study. *Fetal Diagnosis and Therapy*. 2009 December;26(4):189-94.
807. D'Anna R, Baviera G, Corrado F, Giordano D, De Vivo A, Nicocia G, et al. Adiponectin and insulin resistance in early- and late-onset pre-eclampsia. *Bjog*. 2006 Nov;113(11):1264-9.
808. D'Anna R, Baviera G, Corrado F, Giordano D, Di Benedetto A, Jasonni VM. Plasma adiponectin concentration in early pregnancy and subsequent risk of hypertensive disorders. *Obstetrics and Gynecology*. 2005 August;106(2):340-4.
809. D'Anna R, Baviera G, Corrado F, Ientile R, Granese D, Stella NC. Plasma homocysteine in early and late pregnancies complicated with preeclampsia and isolated intrauterine growth restriction. *Acta Obstet Gynecol Scand*. 2004 Feb;83(2):155-8.
810. Dantas EM, Pereira FV, Queiroz JW, Dantas DL, Monteiro GR, Duggal P, et al. Preeclampsia is associated with increased maternal body weight in a northeastern Brazilian population. *BMC pregnancy and childbirth*. 2013;13:159.
811. D'Antonio F, Rijo C, Thilaganathan B, Akolekar R, Khalil A, Papageorgiou A, et al. Association between first-trimester maternal serum pregnancy-associated plasma protein-A and obstetric complications. *Prenatal diagnosis*. 2013 Sep;33(9):839-47.
812. Danve A, Perry L, Deodhar A. Use of belimumab throughout pregnancy to treat active systemic lupus erythematosus-A case report. *Seminars in Arthritis and Rheumatism*. 2015;44(2):195-7.
813. Dar P, Gebb J, Reimers L, Bernstein PS, Chazotte C, Merkatz IR. First-trimester 3-dimensional power Doppler of the uteroplacental circulation space: A potential screening method for preeclampsia. *American Journal of Obstetrics and Gynecology*. 2010 September;203(3):238.e1-.e7.
814. Darrow LA, Stein CR, Steenland K. Serum perfluorooctanoic acid and perfluorooctane sulfonate concentrations in relation to birth outcomes in the Mid-Ohio Valley, 2005-2010. *Environmental Health Perspectives*. 2013;121(10):1207-13.
815. Dasari P. Maternal mortality and its relationship to emergency obstetric care (EmOC) in a tertiary care hospital in South India. *Obstetric Medicine*. 2015 10 Jun;8(2):86-91.
816. Daskalakis G, Papapanagiotou A, Antonakopoulos N, Mesogitis S, Papantoniou N, Loutradis D, et al. Invasive diagnostic procedures and risk of hypertensive disorders in pregnancy. *International journal of gynaecology and obstetrics: the official organ of the International Federation of Gynaecology and Obstetrics*. 2014 May;125(2):146-9.



817. Dave A, Maru L, Daksha S, Natu N. Weight does matter! A study of effect of obesity on pregnancy and its outcome. *Journal of SAFOG*. 2013;5(3):107-10.
818. Davidson EJ, Riley SC, Roberts SA, Shearing CH, Groome NP, Martin CW. Maternal serum activin, inhibin, human chorionic gonadotrophin and alpha-fetoprotein as second trimester predictors of pre-eclampsia. *Bjog*. 2003 Jan;110(1):46-52.
819. Davis CL. Living Kidney Donors: Current State of Affairs. *Advances in Chronic Kidney Disease*. 2009 July;16(4):242-9.
820. Dayal M, Gupta P, Varma M, Ghosh UK, Bhargava A. Role of second trimester maternal serum markers as predictor of preeclampsia. *Journal of Obstetrics and Gynecology of India*. 2011 February;61(1):38-41.
821. Dayan N, Pilote L, Opatrny L, Basso O, Messerlian C, El-Messidi A, et al. Combined impact of high body mass index and in vitro fertilization on preeclampsia risk: A hospital-based cohort study. *Obesity*. 2015 01 Jan;23(1):200-6.
822. Dayicioglu V, Sahinoglu Z, Kol E, Kucukbas M. The use of standard dose of magnesium sulphate in prophylaxis of eclamptic seizures: do body mass index alterations have any effect on success? *Hypertension in pregnancy*. 2003;22(3):257-65.
823. De Bastos M, Barreto SM, Caiafa JS, Bogutchi T, Rezende SM. Assessment of characteristics associated with pharmacologic thromboprophylaxis use in hospitalized patients: A cohort study of 10016 patients. *Blood Coagulation and Fibrinolysis*. 2013 October;24(7):691-7.
824. De Carolis S, Botta A, Santucci S, Salvi S, Moresi S, Di Pasquo E, et al. Complementemia and obstetric outcome in pregnancy with antiphospholipid syndrome. *Lupus*. 2012 Jun;21(7):776-8.
825. De Galan-Roosen AEM, Kuijpers JC, Rosendaal FR, Steegers EA, Van Beers WA, Ponjee GA, et al. Maternal and paternal thrombophilia: Risk factors for perinatal mortality. *BJOG: An International Journal of Obstetrics and Gynaecology*. 2005 March;112(3):306-11.
826. de Jesus GR, d'Oliveira IC, dos Santos FC, Rodrigues G, Klumb EM, de Jesus NR, et al. Pregnancy may aggravate arterial hypertension in women with Takayasu arteritis. *The Israel Medical Association journal : IMAJ*. 2012 Dec;14(12):724-8.
827. de Jonge A, Mesman JA, Mannien J, Zwart JJ, van Dillen J, van Roosmalen J. Severe adverse maternal outcomes among low risk women with planned home versus hospital births in the Netherlands: nationwide cohort study. *Bmj*. 2013;346:f3263.
828. De Jonge A, Mesman JAJM, Mannien J, Zwart JJ, Buitendijk SE, Van Roosmalen J, et al. Severe adverse maternal outcomes among women in midwife-led versus obstetrician-led care at the onset of labour in the Netherlands: A nationwide cohort study. *PloS one*. 2015 11 May;10(5).
829. de Jonge LL, Steegers EA, Ernst GD, Lindemans J, Russcher H, Hofman A, et al. C-reactive protein levels, blood pressure and the risks of gestational hypertensive complications: the Generation R Study. *J Hypertens*. 2011 Dec;29(12):2413-21.
830. de Kruif MD, Lemaire LC, Giebelen IA, Struck J, Morgenthaler NG, Papassotiriou J, et al. The influence of corticosteroids on the release of novel biomarkers in human endotoxemia. *Intensive care medicine*. 2008 Mar;34(3):518-22.
831. De Laine KM, Matthews G, Grivell RM. Prospective audit of vitamin D levels of women presenting for their first antenatal visit at a tertiary centre. *Australian and New Zealand Journal of Obstetrics and Gynaecology*. 2013 August;53(4):353-7.
832. De Larranaga GF, Remondino G, Alonso BS, Voto L. Soluble thrombomodulin levels among women with a history of recurrent pregnancy loss, with or without antiphospholipid antibodies. *Blood Coagulation and Fibrinolysis*. 2005 January;16(1):31-5.
833. de Melo BC, de Amorim MM, Katz L, Coutinho I, Verissimo G. Uterine artery Doppler in the third trimester of pregnancy and postnatal outcome of patients with severe preeclampsia. *Hypertension in pregnancy*. 2010 Jan;29(2):135-47.

834. De Paco C, Kametas N, Rencoret G, Strobl I, Nicolaides KH. Maternal cardiac output between 11 and 13 weeks of gestation in the prediction of preeclampsia and small for gestational age. *Obstet Gynecol.* 2008 Feb;111(2 Pt 1):292-300.
835. De Silva DA, Halstead AC, Cote AM, Sabr Y, von Dadelszen P, Magee LA. Unexpected random urinary protein:creatinine ratio results-limitations of the pyrocatechol violet-dye method. *BMC pregnancy and childbirth.* 2013;13:152.
836. De Stefano MG, Rosato E, Marcoccia E, Schiavi MC, Zannini I, Capri O, et al. Pregnancy in advanced (> 40) and very advanced (> 45) reproductive age: Maternal and fetal risks. *Giornale Italiano di Ostetricia e Ginecologia.* 2013;35(6):740-6.
837. De Vera MA, Berard A. Antidepressant use during pregnancy and the risk of pregnancy-induced hypertension. *British journal of clinical pharmacology.* 2012 Aug;74(2):362-9.
838. de Vienne CM, Creveuil C, Dreyfus M. Does young maternal age increase the risk of adverse obstetric, fetal and neonatal outcomes: a cohort study. *European journal of obstetrics, gynecology, and reproductive biology.* 2009 Dec;147(2):151-6.
839. De Vivo A, Baviera G, Giordano D, Todarello G, Corrado F, D'Anna R. Endoglin, PlGF and sFlt-1 as markers for predicting pre-eclampsia. *Acta Obstet Gynecol Scand.* 2008;87(8):837-42.
840. De Vos A, Janssens R, VandeVelde H, Haentjens P, Bonduelle M, Tournaye H, et al. The type of culture medium and the duration of in vitro culture do not influence birthweight of ART singletons. *Human reproduction.* 2015 01 Jan;30(1):20-7.
841. De Wilde MA, Veltman-Verhulst SM, Goverde AJ, Lambalk CB, Laven JSE, Franx A, et al. Preconception predictors of gestational diabetes: A multicentre prospective cohort study on the predominant complication of pregnancy in polycystic ovary syndrome. *Human reproduction.* 2014;29(6):1327-36.
842. Debasmita M, Bipin M, Pratim SP, Arpita RC, Chandra BS. Dialysis requiring pregnancy related acute kidney injury - A single center experience. *Kuwait Medical Journal.* 2010 June;42(2):124-8.
843. Debiec KE, Paul KJ, Mitchell CM, Hitti JE. Inadequate prenatal care and risk of preterm delivery among adolescents: A retrospective study over 10 years. *American Journal of Obstetrics and Gynecology.* 2010;203(2):122.e1-.e6.
844. Debieve F, Duliere S, Bernard P, Hubinont C, De Nayer P, Daumerie C. To treat or not to treat euthyroid autoimmune disorder during pregnancy? *Gynecologic and Obstetric Investigation.* 2009 April;67(3):178-82.
845. Dede FS, Celen S, Bilgin S, Ure G, Ozcan AO, Buzgan T, et al. Maternal deaths associated with H1N1 influenza virus infection in Turkey: A whole-of-population report. *BJOG: An International Journal of Obstetrics and Gynaecology.* 2011 September;118(10):1216-22.
846. Deeks ED. 17 alpha-hydroxyprogesterone caproate (Makena<sup>TM</sup>): In the prevention of preterm birth. *Pediatric Drugs.* 2011;13(5):337-45.
847. Deen ME, Ruurda LG, Wang J, Dekker GA. Risk factors for preeclampsia in multiparous women: primipaternity versus the birth interval hypothesis. *The journal of maternal-fetal & neonatal medicine : the official journal of the European Association of Perinatal Medicine, the Federation of Asia and Oceania Perinatal Societies, the International Society of Perinatal Obstet.* 2006 Feb;19(2):79-84.
848. Defant J, Gambello MJ, Monga M, Langlois PH, Noblin SJ, Vidaeff AC. Fetal trisomy 21 and the risk of preeclampsia. *Journal of Maternal-Fetal and Neonatal Medicine.* 2010 January;23(1):55-9.
849. DeFelice C, Tassi R, De Capua B, Jaubert F, Gentile M, Quartulli L, et al. A new phenotypical variant of intrauterine growth restriction? *Pediatrics.* 2007 Apr;119(4):e983-90.
850. Defranco EA, Seske LM, Greenberg JM, Muglia LJ. Influence of interpregnancy interval on neonatal morbidity. *American Journal of Obstetrics and Gynecology.* 2015 01 Mar;212(3):386.e1-.e9.
851. Dehghan P, Gargari BP, Jafar-Abadi MA, Aliasgharzadeh A. Inulin controls inflammation and metabolic endotoxemia in women with type 2 diabetes mellitus: a randomized-controlled clinical trial.

International journal of food sciences and nutrition. 2014 Feb;65(1):117-23.

852. Deis S, Rouzier R, Kayem G, Masson C, Haddad B. Development of a nomogram to predict occurrence of preeclampsia. *European Journal of Obstetrics Gynecology and Reproductive Biology*. 2008 April;137(2):146-51.

853. Dekker GA, Lee SY, North RA, McCowan LM, Simpson NA, Roberts CT. Risk factors for preterm birth in an international prospective cohort of nulliparous women. *PloS one*. 2012;7(7):e39154.

854. Dekker RR, Jochemsen BM, Van Pampus MG, Santema JG, Roozendaal C, Groen H, et al. History of preeclampsia is not associated with an increased risk of thyroid dysfunction. *Acta Obstetrica et Gynecologica Scandinavica*. 2010 August;89(8):1071-7.

855. Delahaije DH, van Kuijk SM, Dirksen CD, Sep SJ, Peeters LL, Spaanderman ME, et al. Cost-effectiveness of recurrence risk guided care versus care as usual in women who suffered from early-onset preeclampsia including HELLP syndrome in their previous pregnancy (the PreCare study). *BMC pregnancy and childbirth*. 2010;10:60.

856. Delic R, Stefanovic M, Krivec S, Weber V. Statistical regression model of standard and new laboratory markers and its usefulness in prediction of preeclampsia. *The journal of maternal-fetal & neonatal medicine : the official journal of the European Association of Perinatal Medicine, the Federation of Asia and Oceania Perinatal Societies, the International Society of Perinatal Obstet*. 2014 Mar;27(4):388-92.

857. Delle Chiaie L, Gramellini D, Piantelli G, Manotti C, Fieni S, Vadora E. Doppler velocimetry and thrombophilic screening at middle trimester of gestation: preliminary data. *European journal of obstetrics, gynecology, and reproductive biology*. 2001 Nov;99(1):38-46.

858. Demers S, Bujold E, Arenas E, Castro A, Nicolaidis KH. Prediction of recurrent preeclampsia using first-trimester uterine artery Doppler. *Am J Perinatol*. 2014 Feb;31(2):99-104.

859. Demir B, Erel CT, Haberal A, Ozturk N, Guler D, Kocak M. Adjusted leptin level (ALL) is a predictor for hyperemesis gravidarum. *European Journal of Obstetrics Gynecology and Reproductive Biology*. 2006 01 Feb;124(2):193-6.

860. Demir CF, Inci MF, Ozkan F, Yildiz M, Ozdemir H. Clinical and radiological management and outcome of pregnancies complicated by cerebral venous thrombosis: A review of 19 cases. *Journal of Stroke and Cerebrovascular Diseases*. 2013 November;22(8):1252-7.

861. Demir SC, Evruke C, Ozgunen FT, Urunsak IF, Candan E, Kadayifci O. Factors that influence morbidity and mortality in severe preeclampsia, eclampsia and hemolysis, elevated liver enzymes, and low platelet count syndrome. *Saudi medical journal*. 2006 Jul;27(7):1015-8.

862. Demirci O, Kumru P, Arinkan A, Ardic C, Arisoy R, Tozkir E, et al. Spot protein/creatinine ratio in preeclampsia as an alternative for 24-hour urine protein. *Balkan Medical Journal*. 2015;32(1):51-5.

863. Demirci O, Tugrul AS, Dolgun N, Sozen H, Eren S. Serum lipids level assessed in early pregnancy and risk of pre-eclampsia. *The journal of obstetrics and gynaecology research*. 2011 Oct;37(10):1427-32.

864. Demirel I, Kavak BS, Ozer AB, Bayar MK, Erhan OL. An intensive care approach to posterior reversible encephalopathy syndrome (PRES): An analysis of 7 cases. *Journal of the Turkish German Gynecology Association*. 2014;15(4):217-21.

865. Demirkesen O, Cetinel B, Yaycioglu O, Uygun N, Solok V. Unusual cause of early preeclampsia: Bladder paraganglioma. *Urology*. 2000 July;56(1):154xxviii-xxxi.

866. Demirkiran O, Dikmen Y, Utku T, Urkmez S. Critically ill obstetric patients in the intensive care unit. *International Journal of Obstetric Anesthesia*. 2003 October;12(4):266-70.

867. Demirtas O, Gelal F, Vidinli BD, Demirtas LO, Uluc E, Baloglu A. Cranial MR imaging with clinical correlation in preeclampsia and eclampsia. *Diagnostic and interventional radiology (Ankara, Turkey)*. 2005 Dec;11(4):189-94.

868. Dempsey JC, Williams MA, Leisenring WM, Shy K, Luthy DA. Maternal birth weight in relation to plasma lipid concentrations in early pregnancy. *Am J Obstet Gynecol*. 2004 May;190(5):1359-68.

869. Denison FC, Norrie G, Graham B, Lynch J, Harper N, Reynolds RM. Increased maternal BMI is associated with an increased risk of minor complications during pregnancy with consequent cost implications. *BJOG: An International Journal of Obstetrics and Gynaecology*. 2009 October;116(11):1467-72.
870. Denison FC, Norwood P, Bhattacharya S, Duffy A, Mahmood T, Morris C, et al. Association between maternal body mass index during pregnancy, short-term morbidity, and increased health service costs: A population-based study. *BJOG: An International Journal of Obstetrics and Gynaecology*. 2014 January;121(1):72-81.
871. Dennedy MC, Avalos G, O'Reilly MW, O'Sullivan EP, Dunne FP. The impact of maternal obesity on gestational outcomes. *Irish medical journal*. 2012 May;105(5 Suppl):23-5.
872. Dennedy MC, Avalos G, O'Reilly MW, O'Sullivan EP, Gaffney G, Dunne F. ATLANTIC-DIP: raised maternal body mass index (BMI) adversely affects maternal and fetal outcomes in glucose-tolerant women according to International Association of Diabetes and Pregnancy Study Groups (IADPSG) criteria. *The Journal of clinical endocrinology and metabolism*. 2012 Apr;97(4):E608-12.
873. Depypere HT, Langlois MR, Delanghe JR, Temmerman M, Dhont M. Haptoglobin polymorphism in patients with preeclampsia. *Clin Chem Lab Med*. 2006;44(8):924-8.
874. Der EM, Moyer C, Gyasi RK, Akosa AB, Tettey Y, Akakpo PK, et al. Pregnancy related causes of deaths in Ghana: a 5-year retrospective study. *Ghana Med J*. 2013 Dec;47(4):158-63.
875. Der H, Kerekes G, Veres K, Szodoray P, Toth J, Lakos G, et al. Impaired endothelial function and increased carotid intima-media thickness in association with elevated von Willebrand antigen level in primary antiphospholipid syndrome. *Lupus*. 2007;16(7):497-503.
876. Deruelle P, Coudoux E, Ego A, Houfflin-Debarge V, Codaccioni X, Subtil D. Risk factors for post-partum complications occurring after preeclampsia and HELLP syndrome. A study in 453 consecutive pregnancies. *European journal of obstetrics, gynecology, and reproductive biology*. 2006 Mar 1;125(1):59-65.
877. Derzbach L, Balogh A, Bokodi G, Vasarhelyi B, Rigo J, Jr. Ser128Arg E-selectin and Thr715Pro P-selectin polymorphisms and severe preeclampsia. *The Journal of reproductive medicine*. 2007 Sep;52(9):815-8.
878. Desai DK, Adanlawo M, Naidoo DP, Moodley J, Kleinschmidt I. Mitral stenosis in pregnancy: a four-year experience at King Edward VIII Hospital, Durban, South Africa. *Bjog*. 2000 Aug;107(8):953-8.
879. DeSancho MT, Berlus N, Christos PJ, Rand J. Risk factors for clinical manifestations in carriers of Factor v Leiden and prothrombin gene mutations. *Blood Coagulation and Fibrinolysis*. 2010 January;21(1):11-5.
880. Detti L, Mecacci F, Piccioli A, Ferrarello S, Carignani L, Mello G, et al. Postpartum heparin therapy for patients with the syndrome of hemolysis, elevated liver enzymes, and low platelets (HELLP) is associated with significant hemorrhagic complications. *Journal of perinatology : official journal of the California Perinatal Association*. 2005 Apr;25(4):236-40.
881. DeVader SR, Neeley HL, Myles TD, Leet TL. Evaluation of gestational weight gain guidelines for women with normal prepregnancy body mass index. *Obstet Gynecol*. 2007 Oct;110(4):745-51.
882. Devarajan K, Kives S, Ray JG. Placental location and newborn weight. *Journal of obstetrics and gynaecology Canada : JOGC = Journal d'obstetrique et gynecologie du Canada : JOGC*. 2012 Apr;34(4):325-9.
883. Devi RKP, Devi SS, Singh LR, Singh NN. Maternal mortality: A study of ten years. *JMS - Journal of Medical Society*. 2006 September;20(3):128-31.
884. Devisme L, Merlot B, Ego A, Houfflin-Debarge V, Deruelle P, Subtil D. A case-control study of placental lesions associated with pre-eclampsia. *International journal of gynaecology and obstetrics: the official organ of the International Federation of Gynaecology and Obstetrics*. 2013 Feb;120(2):165-8.
885. Dhanjal MK, Owen EP, Anthony JA, Davidson JS, Rayner BL. Association of pre-eclampsia with

- the R563Q mutation of the beta-subunit of the epithelial sodium channel. *Bjog*. 2006 May;113(5):595-8.
886. Dhar JP, Levy P, Essenmacher L, Ager J, Chiodo L, Schultz D, et al. Premature cardiovascular disease in women with lupus and relationship to disease severity. *Current Women's Health Reviews*. 2013;9(4):226-9.
887. Dholakia S, Inwald D, Betts H, Nadel S. Endotoxemia in pediatric critical illness--a pilot study. *Critical care (London, England)*. 2011;15(3):R141.
888. Di Lorenzo G, Ceccarello M, Cecotti V, Ronfani L, Monasta L, Vecchi Brumatti L, et al. First trimester maternal serum PIGF, free beta-hCG, PAPP-A, PP-13, uterine artery Doppler and maternal history for the prediction of preeclampsia. *Placenta*. 2012 Jun;33(6):495-501.
889. Di Lorenzo G, Monasta L, Ceccarello M, Cecotti V, D'Ottavio G. Third trimester abdominal circumference, estimated fetal weight and uterine artery doppler for the identification of newborns small and large for gestational age. *European journal of obstetrics, gynecology, and reproductive biology*. 2013 Feb;166(2):133-8.
890. Di Loreto P, Martino F, Chiaramonte S, Disegna D, Ronco C, Marchesoni D, et al. Pregnancy after kidney transplantation: two transplantation centers--Vicenza-Udine experience. *Transplant Proc*. 2010 May;42(4):1158-61.
891. Dias M, Boguszewski C, Gadelha M, Kasuki L, Musolino N, Vieira JG, et al. Acromegaly and pregnancy: a prospective study. *European journal of endocrinology / European Federation of Endocrine Societies*. 2014 Feb;170(2):301-10.
892. Diav-Citrin O, Shechtman S, Tahover E, Finkel-Pekarsky V, Arnon J, Kennedy D, et al. Pregnancy outcome following in utero exposure to lithium: A prospective, comparative, observational study. *American Journal of Psychiatry*. 2014 01 Jul;171(7):785-94.
893. Dideriksen D, Pottegard A, Hallas J, Aagaard L, Damkier P. First Trimester In Utero Exposure to Methylphenidate. *Basic and Clinical Pharmacology and Toxicology*. 2013 February;112(2):73-6.
894. Diesch CH, Holzgreve W, Hahn S, Zhong XY. Comparison of activin A and cell-free fetal DNA levels in maternal plasma from patients at high risk for preeclampsia. *Prenatal diagnosis*. 2006 Dec;26(13):1267-70.
895. DiGiulio DB, Gervasi M, Romero R, Mazaki-Tovi S, Vaisbuch E, Kusanovic JP, et al. Microbial invasion of the amniotic cavity in preeclampsia as assessed by cultivation and sequence-based methods. *J Perinat Med*. 2010 Sep;38(5):503-13.
896. Diguisto C, Le Gouge A, Piver E, Giraudeau B, Perrotin F. Second-trimester uterine artery Doppler, PIGF, sFlt-1, sEndoglin, and lipid-related markers for predicting preeclampsia in a high-risk population. *Prenatal diagnosis*. 2013 November;33(11):1070-4.
897. Dimitriou G, Fouzas S, Georgakis V, Vervenioti A, Papadopoulos VG, Decavalas G, et al. Determinants of morbidity in late preterm infants. *Early Human Development*. 2010 September;86(9):587-91.
898. Ding D, Scott NM, Thompson EE, Chaiworapongsa T, Torres R, Billstrand C, et al. Increased protein-coding mutations in the mitochondrial genome of African American women with preeclampsia. *Reproductive Sciences*. 2012 December;19(12):1343-51.
899. Dizon-Townson D, Miller C, Sibai B, Spong CY, Thom E, Wendel G, Jr., et al. The relationship of the factor V Leiden mutation and pregnancy outcomes for mother and fetus. *Obstet Gynecol*. 2005 Sep;106(3):517-24.
900. Djurovic S, Clausen T, Wergeland R, Brosstad F, Berg K, Henriksen T. Absence of enhanced systemic inflammatory response at 18 weeks of gestation in women with subsequent pre-eclampsia. *Bjog*. 2002 Jul;109(7):759-64.
901. Dodd JM, Crowther CA, Antoniou G, Baghurst P, Robinson JS. Screening for gestational diabetes: the effect of varying blood glucose definitions in the prediction of adverse maternal and infant health outcomes. *The Australian & New Zealand journal of obstetrics & gynaecology*. 2007 Aug;47(4):307-12.

902. Dodds L, Fell DB, Dooley KC, Armson BA, Allen AC, Nassar BA, et al. Effect of homocysteine concentration in early pregnancy on gestational hypertensive disorders and other pregnancy outcomes. *Clinical Chemistry*. 2008;54(2):326-34.
903. Dodds L, Fell DB, Joseph KS, Allen VM, Butler B. Outcomes of pregnancies complicated by hyperemesis gravidarum. *Obstetrics and Gynecology*. 2006 February;107(2 1):285-92.
904. Doherty A, Carvalho JC, Drewlo S, El-Khuffash A, Downey K, Dodds M, et al. Altered hemodynamics and hyperuricemia accompany an elevated sFlt-1/PlGF ratio before the onset of early severe preeclampsia. *Journal of obstetrics and gynaecology Canada : JOGC = Journal d'obstetrique et gynecologie du Canada : JOGC*. 2014 Aug;36(8):692-700.
905. Doherty DA, Magann EF, Francis J, Morrison JC, Newnham JP. Pre-pregnancy body mass index and pregnancy outcomes. *International journal of gynaecology and obstetrics: the official organ of the International Federation of Gynaecology and Obstetrics*. 2006 Dec;95(3):242-7.
906. Dokras A, Baredziak L, Blaine J, Syrop C, VanVoorhis BJ, Sparks A. Obstetric outcomes after in vitro fertilization in obese and morbidly obese women. *Obstet Gynecol*. 2006 Jul;108(1):61-9.
907. Dola C, Tran T, Linhuber AM, Cierny J, Denicola N, Chong E, et al. Preterm birth after mature fetal lung indices: Is there any neonatal morbidity? *Journal of Maternal-Fetal and Neonatal Medicine*. 2011 January;24(1):73-8.
908. Dolanbay M, Kutuk MS, Ozgun MT, Uludag S, Borlu A, GURSOY H, et al. Evaluation of cases of maternal mortality in Kayseri  
Kayseri ili maternal mortalite olgulari{dotless}ni{dotless}n degerlendirilmesi. *Erciyes Tip Dergisi*. 2013;35(3):132-5.
909. Dolapcioglu K, Gungoren A, Hakverdi S, Hakverdi AU, Egilmez E. Twin pregnancy with a complete hydatidiform mole and co-existent live fetus: Two case reports and review of the literature. *Archives of Gynecology and Obstetrics*. 2009 March;279(3):431-6.
910. Dolente BA, Beech J, Lindborg S, Smith G. Evaluation of risk factors for development of catheter-associated jugular thrombophlebitis in horses: 50 cases (1993-1998). *Journal of the American Veterinary Medical Association*. 2005 Oct 1;227(7):1134-41.
911. Dolitzky M, Inbal A, Segal Y, Weiss A, Brenner B, Carp H. A randomized study of thromboprophylaxis in women with unexplained consecutive recurrent miscarriages. *Fertility and sterility*. 2006 August;86(2):362-6.
912. Donegan K, King B, Bryan P. Safety of pertussis vaccination in pregnant women in UK: observational study. *Bmj*. 2014;349:g4219.
913. Donnelly JC, Cooley SM, Walsh TA, Smith OP, Gillan J, McMahon C, et al. Circulating pro-and anticoagulant levels in normal and complicated primigravid pregnancies and their relationship to placental pathology. *Journal of Obstetrics and Gynaecology*. 2013 April;33(3):264-8.
914. Donnelly RT, Pinto NM, Kocolas I, Yetman AT. The immediate and long-term impact of pregnancy on aortic growth rate and mortality in women with Marfan syndrome. *Journal of the American College of Cardiology*. 2012 17 Jul;60(3):224-9.
915. Donovan P. Hypertensive disorders of pregnancy. *Australian Prescriber*. 2012 April;35(2):47-50.
916. Dorheim SK, Bjorvatn B, Eberhard-Gran M. Sick leave during pregnancy: A longitudinal study of rates and risk factors in a Norwegian population. *BJOG: An International Journal of Obstetrics and Gynaecology*. 2013 April;120(5):521-30.
917. Dostal M, Weber-Schoendorfer C, Sobesky J, Schaefer C. Pregnancy outcome following use of levodopa, pramipexole, ropinirole, and rotigotine for restless legs syndrome during pregnancy: A case series. *European Journal of Neurology*. 2013 September;20(9):1241-6.
918. Doubilet PM, Benson CB, Wilkins-Haug L, Ringer S. Fetuses subsequently born premature are smaller than gestational age-matched fetuses not born premature. *Journal of Ultrasound in Medicine*. 2003 01 Apr;22(4):359-63.

919. Doubova SV, Perez-Cuevas R, Ortiz-Panozo E, Hernandez-Prado B. Evaluation of the quality of antenatal care using electronic health record information in family medicine clinics of Mexico City. *BMC pregnancy and childbirth*. 2014 16 May;14(1).
920. Dover N, Gulerman HC, Celen S, Kahyaoglu S, Yenicesu O. Placental growth factor: As an early second trimester predictive marker for preeclampsia in normal and high-risk pregnancies in a Turkish population. *Journal of Obstetrics and Gynecology of India*. 2013 June;63(3):158-63.
921. Doyle NM, Gardner MO, Wells L, Qualls C, Papile LA. Outcome of very low birth weight infants exposed to antenatal indomethacin for tocolysis. *Journal of perinatology : official journal of the California Perinatal Association*. 2005 May;25(5):336-40.
922. Dragosloveanu C, Vladareanu S, Vladareanu R. High-risk human papillomavirus and risk of preeclampsia: A possible connection? *Ginecologie*. 2014 01 Jan;10(3):93-7.
923. Drakeley AJ, Le Roux PA, Anthony J, Penny J. Acute renal failure complicating severe preeclampsia requiring admission to an obstetric intensive care unit. *Am J Obstet Gynecol*. 2002 Feb;186(2):253-6.
924. Drenthen W, Pieper PG, van der Tuuk K, Roos-Hesselink JW, Hoendermis ES, Voors AA, et al. Fertility, pregnancy and delivery in women after biventricular repair for double outlet right ventricle. *Cardiology*. 2008;109(2):105-9.
925. Drenthen W, Pieper PG, Zoon N, Roos-Hesselink JW, Voors AA, Mulder BJ, et al. Pregnancy after biventricular repair for pulmonary atresia with ventricular septal defect. *The American journal of cardiology*. 2006 Jul 15;98(2):262-6.
926. Dreyfus M, Hedelin G, Kutnahorsky R, Lehmann M, Viville B, Langer B, et al. Antiphospholipid antibodies and preeclampsia: a case-control study. *Obstet Gynecol*. 2001 Jan;97(1):29-34.
927. Driul L, Cacciaguerra G, Citossi A, Martina MD, Peressini L, Marchesoni D. Prepregnancy body mass index and adverse pregnancy outcomes. *Arch Gynecol Obstet*. 2008 Jul;278(1):23-6.
928. Drost JT, Arpaci G, Ottervanger JP, de Boer MJ, van Eyck J, van der Schouw YT, et al. Cardiovascular risk factors in women 10 years post early preeclampsia: the Preeclampsia Risk Evaluation in FEMales study (PREVFEM). *Eur J Prev Cardiol*. 2012 Oct;19(5):1138-44.
929. Drost JT, van der Schouw YT, Ottervanger JP, van Eyck J, de Boer MJ, Maas AH. Electrocardiographic parameters in women ten years post-early preeclampsia. *Maturitas*. 2012 Oct;73(2):148-51.
930. D'Souza V, Patil V, Pisal H, Randhir K, Joshi A, Mehendale S, et al. Levels of brain derived neurotrophic factors across gestation in women with preeclampsia. *International journal of developmental neuroscience : the official journal of the International Society for Developmental Neuroscience*. 2014 Oct;37:36-40.
931. Du M, Basu A, Fu D, Wu M, Centola M, Jenkins AJ, et al. Serum inflammatory markers and preeclampsia in type 1 diabetes: a prospective study. *Diabetes Care*. 2013 Jul;36(7):2054-61.
932. Dubost C, Le Gouez A, Jouffroy V, Roger-Christoph S, Benhamou D, Mercier FJ, et al. Optic nerve sheath diameter used as ultrasonographic assessment of the incidence of raised intracranial pressure in preeclampsia: A pilot study. *Anesthesiology*. 2012 May;116(5):1066-71.
933. Ducarme G, Revaux A, Rodrigues A, Aissaoui F, Pharisien I, Uzan M. Obstetric outcome following laparoscopic adjustable gastric banding. *International journal of gynaecology and obstetrics: the official organ of the International Federation of Gynaecology and Obstetrics*. 2007 Sep;98(3):244-7.
934. Dudding T, Heron J, Thakkestian A, Nurk E, Golding J, Pembrey M, et al. Factor V Leiden is associated with pre-eclampsia but not with fetal growth restriction: A genetic association study and meta-analysis. *Journal of Thrombosis and Haemostasis*. 2008;6(11):1868-75.
935. Dudding TE, Attia J. The association between adverse pregnancy outcomes and maternal factor V Leiden genotype: A meta-analysis. *Thrombosis and Haemostasis*. 2004 April;91(4):700-11.
936. Duffy CR, Odibo AO, Roehl KA, Macones GA, Cahill AG. Effect of magnesium sulfate on fetal

- heart rate patterns in the second stage of labor. *Obstet Gynecol.* 2012 Jun;119(6):1129-36.
937. Dufourq N, Thomson M, Adhikari M, Moodley J. Massive pulmonary haemorrhage as a cause of death in the neonate--a retrospective review. *South African medical journal = Suid-Afrikaanse tydskrif vir geneeskunde.* 2004 Apr;94(4):299-302.
938. Dugo L, Collin M, Allen DA, Patel NS, Bauer I, Mervaal EM, et al. GSK-3beta inhibitors attenuate the organ injury/dysfunction caused by endotoxemia in the rat. *Crit Care Med.* 2005 Sep;33(9):1903-12.
939. Dugoff L, Hobbins JC, Malone FD, Vidaver J, Sullivan L, Canick JA, et al. Quad screen as a predictor of adverse pregnancy outcome. *Obstet Gynecol.* 2005 Aug;106(2):260-7.
940. Dukler D, Porath A, Bashiri A, Erez O, Mazor M. Remote prognosis of primiparous women with preeclampsia. *European Journal of Obstetrics Gynecology and Reproductive Biology.* 2001;96(1):69-74.
941. Duley L. Do women with pre-eclampsia, and their babies, benefit from magnesium sulphate? The Magpie Trial: A randomised placebo-controlled trial. *Lancet.* 2002 01 Jun;359(9321):1877-90.
942. Duley L, Farrell B, Armstrong N, Spark P, Roberts B, Smyth R, et al. The Magpie Trial: A randomised trial comparing magnesium sulphate with placebo for pre-eclampsia. Outcome for children at 18 months. *BJOG: An International Journal of Obstetrics and Gynaecology.* 2007 March;114(3):289-99.
943. Duley L, Henderson-Smart D, Knight M, King J. Antiplatelet drugs for prevention of pre-eclampsia and its consequences: Systematic review. *British Medical Journal.* 2001 10 Feb;322(7282):329-33.
944. Dumont A, De Bernis L, Bouvier-Colle MH, Breart G. Caesarean section rate for maternal indication in sub-Saharan Africa: A systematic review. *Lancet.* 2001 20 Oct;358(9290):1328-33.
945. Dumont A, Fournier P, Abrahamowicz M, Traore M, Haddad S, Fraser WD. Quality of care, risk management, and technology in obstetrics to reduce hospital-based maternal mortality in Senegal and Mali (QUARITE): A cluster-randomised trial. *The Lancet.* 2013;382(9887):146-57.
946. Dumont A, Gaye A, Mahe P, Bouvier-Colle MH. Emergency obstetric care in developing countries: Impact of guidelines implementation in a community hospital in Senegal. *BJOG: An International Journal of Obstetrics and Gynaecology.* 2005 September;112(9):1264-9.
947. Dunk CE, Roggensack AM, Cox B, Perkins JE, Asenius F, Keating S, et al. A distinct microvascular endothelial gene expression profile in severe IUGR placentas. *Placenta.* 2012 Apr;33(4):285-93.
948. Dunne F, Brydon P, Smith K, Gee H. Pregnancy in women with Type 2 diabetes: 12 years outcome data 1990-2002. *Diabetic medicine : a journal of the British Diabetic Association.* 2003 Sep;20(9):734-8.
949. Dutta I, Joshi P. Maternal and perinatal outcome in teenage Vs. vicenarian primigravidae - A clinical study. *Journal of Clinical and Diagnostic Research.* 2013 15 Dec;7(12):2881-4.
950. Dwyer BK, Gorman M, Carroll IR, Druzin M. Urinalysis vs urine protein-creatinine ratio to predict significant proteinuria in pregnancy. *Journal of perinatology : official journal of the California Perinatal Association.* 2008 Jul;28(7):461-7.
951. Dwyer BK, Krieg S, Balise R, Carroll IR, Chueh J, Nayak N, et al. Variable expression of soluble fms-like tyrosine kinase 1 in patients at high risk for preeclampsia. *The journal of maternal-fetal & neonatal medicine : the official journal of the European Association of Perinatal Medicine, the Federation of Asia and Oceania Perinatal Societies, the International Society of Perinatal Obstet.* 2010 Jul;23(7):705-11.
952. Dwyer T, Sun C, Magnussen CG, Raitakari OT, Schork NJ, Venn A, et al. Cohort profile: The International Childhood Cardiovascular Cohort (i3c) Consortium. *International journal of epidemiology.* 2013 February;42(1):86-96.
953. Dyer RA, Els I, Farbas J, Torr GJ, Schoeman LK, James MF. Prospective, randomized trial comparing general with spinal anesthesia for cesarean delivery in preeclamptic patients with a nonreassuring fetal heart trace. *Anesthesiology.* 2003 Sep;99(3):561-9; discussion 5A-6A.



954. Dyer RA, Piercy JL, Reed AR, Strathie GW, Lombard CJ, Anthony JA, et al. Comparison between pulse waveform analysis and thermodilution cardiac output determination in patients with severe pre-eclampsia. *Br J Anaesth*. 2011 Jan;106(1):77-81.
955. Easterling TR, Carr DB, Brateng D, Diederichs C, Schmucker B. Treatment of hypertension in pregnancy: effect of atenolol on maternal disease, preterm delivery, and fetal growth. *Obstet Gynecol*. 2001 Sep;98(3):427-33.
956. Easterling TR, Carr DB, Davis C, Diederichs C, Brateng DA, Schmucker B. Low-dose, short-acting, angiotensin-converting enzyme inhibitors as rescue therapy in pregnancy. *Obstet Gynecol*. 2000 Dec;96(6):956-61.
957. Ebeigbe PN, Aziken ME. Early onset pregnancy-induced hypertension/eclampsia in Benin City, Nigeria. *Nigerian journal of clinical practice*. 2010 Dec;13(4):388-93.
958. Ebeigbe PN, Gharoro EP. A raised mid-trimester mean arterial blood pressure: is it predictive of pregnancy induced hypertension in nigerian pregnant women? *Niger Postgrad Med J*. 2004 Dec;11(4):294-7.
959. Ebenroth ES, Cordes TM, Darragh RK. Second-line treatment of fetal supraventricular tachycardia using flecainide acetate. *Pediatric Cardiology*. 2001;22(6):483-7.
960. Ebner F, Wockel A, Janni W, Paterson H. Parachuting and pregnancy: What do we know about pregnant skydivers and the risks they are taking? *Clinical Journal of Sport Medicine*. 2014;24(6):468-73.
961. Ebrashy A, Azmy O, Ibrahim M, Waly M, Edris A. Middle cerebral/umbilical artery resistance index ratio as sensitive parameter for fetal well-being and neonatal outcome in patients with preeclampsia: case-control study. *Croat Med J*. 2005 Oct;46(5):821-5.
962. Ecevit C, Unal F, Baran M, Aydogdu S. Parenthood in pediatric liver transplant patients. *Pediatr Transplant*. 2012 Jun;16(4):346-9.
963. Edlow AG, Hou MY, Maurer R, Benson C, Delli-Bovi L, Goldberg AB. Uterine evacuation for second-trimester fetal death and maternal morbidity. *Obstetrics and Gynecology*. 2011 February;117(2 PART 1):307-16.
964. Edlow AG, Srinivas SK, Elovitz MA. Investigating the risk of hypertension shortly after pregnancies complicated by preeclampsia. *American Journal of Obstetrics and Gynecology*. 2009 May;200(5):e60-e2.
965. Edlow BL, Kasner SE, Hurst RW, Weigele JB, Levine JM. Reversible cerebral vasoconstriction syndrome associated with subarachnoid hemorrhage. *Neurocritical Care*. 2007 December;7(3):203-10.
966. Efezie ER, Okafor UV. Maternal outcome in eclamptic patients in Abuja, Nigeria--a 5 year review. *Nigerian journal of clinical practice*. 2007 Dec;10(4):309-13.
967. Effendi M, Demers S, Giguere Y, Forest JC, Brassard N, Girard M, et al. Association between first-trimester placental volume and birth weight. *Placenta*. 2014 Feb;35(2):99-102.
968. Egan AM, Dennedy MC, Al-Ramli W, Heerey A, Avalos G, Dunne F. ATLANTIC-DIP: Excessive gestational weight gain and pregnancy outcomes in women with gestational or pregestational diabetes mellitus. *Journal of Clinical Endocrinology and Metabolism*. 2014 January;99(1):212-9.
969. Eger SH, Sommerfelt K, Kiserud T, Markestad T. Foetal umbilical artery Doppler in small preterms: (IQ) neurocognitive outcome at 5 years of age. *Acta paediatrica (Oslo, Norway : 1992)*. 2013 Apr;102(4):403-9.
970. Egerman RS, Ramsey RD, Kao LW, Bringman JJ, Bush AJ, Wan JY. Hypertensive disease in pregnancies complicated by systemic lupus erythematosus. *Am J Obstet Gynecol*. 2005 Nov;193(5):1676-9.
971. Ehrenberg HM, Dierker L, Milluzzi C, Mercer BM. Prevalence of maternal obesity in an urban center. *Am J Obstet Gynecol*. 2002 Nov;187(5):1189-93.
972. Ehrental DB, Maiden K, Rao A, West DW, Gidding SS, Bartoshesky L, et al. Independent relation of maternal prenatal factors to early childhood obesity in the offspring. *Obstet Gynecol*. 2013

Jan;121(1):115-21.

973. Eide MG, Moster D, Irgens LM, Reichborn-Kjennerud T, Stoltenberg C, Skjaerven R, et al. Degree of fetal growth restriction associated with schizophrenia risk in a national cohort. *Psychol Med*. 2013 Oct;43(10):2057-66.
974. Einarson A, Boskovic R. Use and safety of antipsychotic drugs during pregnancy. *Journal of Psychiatric Practice*. 2009 May;15(3):183-92.
975. Ekblom A, Wu J, Adami HO, Lu CM, Lagiou P, Trichopoulos D, et al. Duration of gestation and prostate cancer risk in offspring. *Cancer epidemiology, biomarkers & prevention : a publication of the American Association for Cancer Research, cosponsored by the American Society of Preventive Oncology*. 2000 Feb;9(2):221-3.
976. Ekblom P, Damm P, Andersson AM, Skakkebaek NE, Feldt-Rasmussen U, Mathiesen ER. Serum levels of activin A and inhibin A are not related to the increased susceptibility to pre-eclampsia in type I diabetic pregnancies. *Acta Obstet Gynecol Scand*. 2006;85(2):143-7.
977. Ekblom P, Damm P, Feldt-Rasmussen B, Feldt-Rasmussen U, Molvig J, Mathiesen ER. Pregnancy outcome in type 1 diabetic women with microalbuminuria. *Diabetes Care*. 2001 Oct;24(10):1739-44.
978. Eke AC, Ezebialu IU, Okafor C. Presentation and outcome of eclampsia at a tertiary center in South East Nigeria--a 6-year review. *Hypertension in pregnancy*. 2011;30(2):125-32.
979. Ekele BA, Badung SL. Is serum magnesium estimate necessary in patients with eclampsia on magnesium sulphate? *Afr J Reprod Health*. 2005 Apr;9(1):128-32.
980. Ekeus C, Lindberg L, Lindblad F, Hjern A. Birth outcomes and pregnancy complications in women with a history of anorexia nervosa. *Bjog*. 2006 Aug;113(8):925-9.
981. Ekeus C, Lindblad F, Hjern A. Short stature, smoking habits and birth outcome in international adoptees in Sweden. *Acta Obstet Gynecol Scand*. 2008;87(12):1309-14.
982. Ekpebegh CO, Coetzee EJ, Van Der Merwe L, Levitt NS. A 10-year retrospective analysis of pregnancy outcome in pregestational Type 2 diabetes: Comparison of insulin and oral glucose-lowering agents. *Diabetic Medicine*. 2007 March;24(3):253-8.
983. El Behery MM, Siam S, Seksaka MA, Ibrahim ZM. Reproductive performance in the next pregnancy for nulliparous women with history of first trimester spontaneous abortion. *Arch Gynecol Obstet*. 2013 Oct;288(4):939-44.
984. El Mhamdi S, El Ghardallou M, Ben Salah A, Bouanene I, Sriha A, Ben Salem K, et al. Epidemiological and chronological profile of preterm birth in the region of Monastir (Tunisia) between 1994 and 2012  
Caracteristiques epidemiologiques et chronologiques des naissances prematurees dans la region de Monastir (Tunisie) entre 1994 et 2012. *Eastern Mediterranean Health Journal*. 2015;21(1):13-9.
985. El Sherbiny WS, Soliman A, Nasr AS. Placental protein 13 as an early predictor in Egyptian patients with preeclampsia, correlation to risk, and association with outcome. *Journal of investigative medicine : the official publication of the American Federation for Clinical Research*. 2012 Jun;60(5):818-22.
986. Elatrous S, Nouira S, Ouanes Besbes L, Marghli S, Boussarssar M, Sakkouhi M, et al. Short-term treatment of severe hypertension of pregnancy: prospective comparison of nifedipine and labetalol. *Intensive care medicine*. 2002 Sep;28(9):1281-6.
987. El-Chaar D, Finkelstein SA, Tu X, Fell DB, Gaudet L, Sylvain J, et al. The impact of increasing obesity class on obstetrical outcomes. *Journal of obstetrics and gynaecology Canada : JOGC = Journal d'obstetrique et gynecologie du Canada : JOGC*. 2013 Mar;35(3):224-33.
988. El-Gilany AH, Hammad S. Teenage pregnancy: Proportion and outcome in Al-Hassa, Saudi Arabia. *Paediatrics ME*. 2009 Summer;14(2):42-6.
989. El-Gilany AH, Hammad S. Body mass index and obstetric outcomes in pregnant in Saudi Arabia: a prospective cohort study. *Ann Saudi Med*. 2010 Sep-Oct;30(5):376-80.

990. El-Hamedi A, Shillito J, Simpson NA, Walker JJ. A prospective analysis of the role of uterine artery Doppler waveform notching in the assessment of at-risk pregnancies. *Hypertension in pregnancy*. 2005;24(2):137-45.
991. Elhassan EM, Mirghani OA, Adam I. High maternal mortality and stillbirth in the Wad Medani Hospital, Central Sudan, 2003-2007. *Trop Doct*. 2009 Oct;39(4):238-9.
992. Elhassanien AF, Alghaiaty HAA, Alrefaee F. Fever without source in infants and young children: Dilemma in diagnosis and management. *Risk Management and Healthcare Policy*. 2013 26 Apr;6:7-12.
993. Eliot M, Ferguson J, Reilly MP, Foulkes AS. Ridge regression for longitudinal biomarker data. *The international journal of biostatistics*. 2011;7(1):Article 37.
994. Elkamil AI, Andersen GL, Salvesen KA, Skranes J, Irgens LM, Vik T. Induction of labor and cerebral palsy: A population-based study in Norway. *Acta Obstetrica et Gynecologica Scandinavica*. 2011 January;90(1):83-91.
995. Elkholi DGEY, Nagy HM. Maternal serum concentrations of angiogenic and antiangiogenic factors in threatened miscarriage at 7-12 weeks' gestation and the risk of adverse pregnancy outcomes. *Middle East Fertility Society Journal*. 2013 September;18(3):208-13.
996. Elkholi DGEY, Nagy HM. The effects of adipocytokines on the endocrino-metabolic features and obstetric outcome in pregnant obese women with polycystic ovary syndrome. *Middle East Fertility Society Journal*. 2014 01 Dec;19(4):293-302.
997. Ellman LM, Huttunen M, Lonnqvist J, Cannon TD. The effects of genetic liability for schizophrenia and maternal smoking during pregnancy on obstetric complications. *Schizophr Res*. 2007 Jul;93(1-3):229-36.
998. El-Messidi A, Patenaude V, Abenhaim HA. Incidence and outcomes of women with non-Hodgkin's lymphoma in pregnancy: A population-based study on 7.9 million births. *Journal of Obstetrics and Gynaecology Research*. 2015 01 Apr;41(4):582-9.
999. Elsen C, Rivas-Echeverria C, Sahland K, Sanchez R, Molma L, Pahl L, et al. Vitamins E, A and B as possible risk factors for preeclampsia under consideration of the PROPER study ("prevention of preeclampsia by high-dose riboflavin supplementation"). *Geburtshilfe und Frauenheilkunde*. 2012;72(9):846-52.
1000. ElSharkawy RM, Moiety FMS, Hegab HM. Study of Urotensin II gene and serum levels in relation to pre-eclampsia. *Clinical and Experimental Obstetrics and Gynecology*. 2014;41(4):394-8.
1001. El-Sherbiny W, Nasr A, Soliman A. Metalloprotease (ADAM12-S) as a predictor of preeclampsia: Correlation with severity, maternal complications, fetal outcome, and doppler parameters. *Hypertension in pregnancy*. 2012 November;31(4):442-50.
1002. El-Sherbiny W, Soliman A, El-Mazny A. Elevated serum-soluble Fas in preeclampsia: Correlation with clinical, laboratory, and Doppler parameters. *Hypertension in pregnancy*. 2011 May;30(2):221-30.
1003. El-Shourbagy MA, El-Refaie TA, Sayed KK, Wahba KA, El-Din AS, Fathy MM. Impact of seroconversion and antichlamydial treatment on the rate of pre-eclampsia among Egyptian primigravidae. *International journal of gynaecology and obstetrics: the official organ of the International Federation of Gynaecology and Obstetrics*. 2011 May;113(2):137-40.
1004. El-Taweel YA, El-Ebyary MM, El-Motayam AS, Agban EL. Seizures profile during pregnancy in women with epilepsy. *Egyptian Journal of Neurology, Psychiatry and Neurosurgery*. 2009;46(1):119-27.
1005. Eltayeb AA, Mostafa MM, Ibrahim NH, Eltayeb AA. The role of surgery in management of necrotizing enterocolitis. *International journal of surgery (London, England)*. 2010;8(6):458-61.
1006. Emet T, Ustuner I, Guven SG, Balik G, Ural UM, Tekin YB, et al. Plasma lipids and lipoproteins during pregnancy and related pregnancy outcomes. *Arch Gynecol Obstet*. 2013 Jul;288(1):49-55.
1007. Enaruna NO, Ande A, Okpere EE. Clinical significance of low serum magnesium in pregnant women attending the University of Benin Teaching Hospital. *Nigerian journal of clinical practice*. 2013 Oct-Dec;16(4):448-53.

1008. Endler M, Saltvedt S, Cnattingius S, Stephansson O, Wikstrom AK. Retained placenta is associated with pre-eclampsia, stillbirth, giving birth to a small-for-gestational-age infant, and spontaneous preterm birth: a national register-based study. *Bjog*. 2014 Nov;121(12):1462-70.
1009. Engel SM, Janevic TM, Stein CR, Savitz DA. Maternal smoking, preeclampsia, and infant health outcomes in New York City, 1995-2003. *American journal of epidemiology*. 2009 Jan 1;169(1):33-40.
1010. Engel SM, Scher E, Wallenstein S, Savitz DA, Alsaker ER, Trogstad L, et al. Maternal active and passive smoking and hypertensive disorders of pregnancy: risk with trimester-specific exposures. *Epidemiology (Cambridge, Mass)*. 2013 May;24(3):379-86.
1011. Engeland A, Bjorge T, Daltveit AK, Skurtveit S, Vangen S, Vollset SE, et al. Risk of diabetes after gestational diabetes and preeclampsia. A registry-based study of 230,000 women in Norway. *Eur J Epidemiol*. 2011 Feb;26(2):157-63.
1012. Engineer N, Kumar S. Perinatal variables and neonatal outcomes in severely growth restricted preterm fetuses. *Acta Obstet Gynecol Scand*. 2010 Sep;89(9):1174-81.
1013. England LJ, Kim SY, Shapiro-Mendoza CK, Wilson HG, Kendrick JS, Satten GA, et al. Effects of maternal smokeless tobacco use on selected pregnancy outcomes in Alaska Native women: a case-control study. *Acta Obstet Gynecol Scand*. 2013 Jun;92(6):648-55.
1014. England LJ, Levine RJ, Qian C, Soule LM, Schisterman EF, Yu KF, et al. Glucose tolerance and risk of gestational diabetes mellitus in nulliparous women who smoke during pregnancy. *American journal of epidemiology*. 2004 Dec 15;160(12):1205-13.
1015. Enquobahrie DA, Williams MA, Butler CL, Frederick IO, Miller RS, Luthy DA. Maternal plasma lipid concentrations in early pregnancy and risk of preeclampsia. *American journal of hypertension*. 2004 Jul;17(7):574-81.
1016. Enrique Valdes R, Karina Lattes A, Hernan Munoz S, Cumsille MA. Sex-hormone binding globulin (SHBG) levels during pregnancy as predictors for pre-eclampsia and fetal growth restriction  
Evaluacion de la globulina transportadora de hormonas esteroidales (SHBG) durante el embarazo como factor predictor de pre-eclampsia y restriccion del crecimiento intrauterino. *Revista Medica de Chile*. 2012 May;140(5):589-94.
1017. Enriquez M, Maruri G, Ezeta G, Hidalgo L, Perez-Lopez FR, Chedraui P. The B-Lynch technique for the management of intraoperative uterine atony. *Journal of obstetrics and gynaecology : the journal of the Institute of Obstetrics and Gynaecology*. 2012 May;32(4):338-41.
1018. Eras JL, Saftlas AF, Triche E, Hsu CD, Risch HA, Bracken MB. Abortion and its effect on risk of preeclampsia and transient hypertension. *Epidemiology (Cambridge, Mass)*. 2000 Jan;11(1):36-43.
1019. Erdemoglu M, Kuyumcuoglu U, Kale A, Akdeniz N. Factors affecting maternal and perinatal outcomes in HELLP syndrome: evaluation of 126 cases. *Clinical and experimental obstetrics & gynecology*. 2010;37(3):213-6.
1020. Erez O, Mayer A, Shoham-Vardi I, Dukler D, Mazor M. Primiparity, assisted reproduction, and preterm birth in twin pregnancies: a population based study. *Arch Gynecol Obstet*. 2008 Apr;277(4):311-7.
1021. Erez O, Novack L, Klaitman V, Erez-Weiss I, Beer-Weisel R, Dukler D, et al. Early preterm delivery due to placenta previa is an independent risk factor for a subsequent spontaneous preterm birth. *BMC pregnancy and childbirth*. 2012 10 Aug;12(82).
1022. Erez O, Romero R, Espinoza J, Fu W, Todem D, Kusanovic JP, et al. The change in concentrations of angiogenic and anti-angiogenic factors in maternal plasma between the first and second trimesters in risk assessment for the subsequent development of preeclampsia and small-for-gestational age. *The journal of maternal-fetal & neonatal medicine : the official journal of the European Association of Perinatal Medicine, the Federation of Asia and Oceania Perinatal Societies, the International Society of Perinatal Obstet*. 2008 May;21(5):279-87.
1023. Erez O, Vardi IS, Hallak M, Hershkovitz R, Dukler D, Mazor M. Preeclampsia in twin gestations:

- association with IVF treatments, parity and maternal age. *The journal of maternal-fetal & neonatal medicine : the official journal of the European Association of Perinatal Medicine, the Federation of Asia and Oceania Perinatal Societies, the International Society of Perinatal Obstet.* 2006 Mar;19(3):141-6.
1024. Erez-Weiss I, Erez O, Shoham-Vardi I, Holcberg G, Mazor M. The association between maternal obesity, glucose intolerance and hypertensive disorders of pregnancy in nondiabetic pregnant women. *Hypertension in pregnancy.* 2005;24(2):125-36.
1025. Eriksson L, Haglund B, Odland V, Altman M, Kieler H. Prenatal inflammatory risk factors for development of bronchopulmonary dysplasia. *Pediatric Pulmonology.* 2014 July;49(7):665-72.
1026. Erkurt MA, Berber I, Berktaş HB, Kuku I, Kaya E, Koroglu M, et al. A life-saving therapy in Class I HELLP syndrome: Therapeutic plasma exchange. *Transfusion and Apheresis Science.* 2015 01 Apr;52(2):194-8.
1027. Erlandsson G, Lambe M, Cnattingius S, Ekblom A. Hyperemesis gravidarum and subsequent breast cancer risk. *British Journal of Cancer.* 2002 21 Oct;87(9):974-6.
1028. Erman Akar M, Ozekinci M, Sanhal C, Kececioglu N, Mendilcioglu I, Senol Y, et al. A retrospective analysis of pregnancy outcomes after kidney transplantation in a single center. *Gynecologic and Obstetric Investigation.* 2015 18 Apr;79(1):13-8.
1029. Eroglu D, Lembed A, Ozdemir FN, Ergin T, Kazanci F, Kuscu E, et al. Pregnancy during hemodialysis: perinatal outcome in our cases. *Transplant Proc.* 2004 Jan-Feb;36(1):53-5.
1030. Ersch J, Baenziger O, Bernet V, Bucher HU. Feeding problems in preterm infants of preeclamptic mothers. *J Paediatr Child Health.* 2008 Nov;44(11):651-5.
1031. Ertan AK, Wagner S, Hendrik HJ, Tanriverdi HA, Schmidt W. Clinical and biophysical aspects of HELLP-syndrome. *J Perinat Med.* 2002;30(6):483-9.
1032. Erturk E, Bostan H, Geze S, Saracoglu S, Erçiyas N, Eroglu A. Total intravenous anesthesia for evacuation of a hydatidiform mole and termination of pregnancy in a patient with thyrotoxicosis. *Int J Obstet Anesth.* 2007 Oct;16(4):363-6.
1033. Esakoff TF, Cheng YW, Snowden JM, Tran SH, Shaffer BL, Caughey AB. Velamentous cord insertion: Is it associated with adverse perinatal outcomes? *Journal of Maternal-Fetal and Neonatal Medicine.* 2015 01 Mar;28(4):409-12.
1034. Eser A, Zulfikaroglu E, Eserdag S, Kilic S, Danisman N. Predictive value of middle cerebral artery to uterine artery pulsatility index ratio in preeclampsia. *Arch Gynecol Obstet.* 2011 Aug;284(2):307-11.
1035. Eskild A, Nilsen TI, Jeansson S, Jenum PA, Vatten LJ. Serum levels of immunoglobulin E and the subsequent risk of pre-eclampsia: a population-based study. *Acta Obstet Gynecol Scand.* 2008;87(3):373-6.
1036. Esmer AC, Goksedef PC, Akca A, Akbayir O, Dagdeviren H, Turan GY, et al. Role of subcutaneous closure in preventing wound complications after cesarean delivery with Pfannenstiel incision: A randomized clinical trial. *Journal of Obstetrics and Gynaecology Research.* 2014 March;40(3):728-35.
1037. Esmer AC, Ozsurmeli M, Kalelioglu I. Maternal and perinatal outcomes of acute pancreatitis during pregnancy. *Gazi Medical Journal.* 2012 December;23(4):133-7.
1038. Espinoza J, Kusanovic JP, Bahado-Singh R, Gervasi MT, Romero R, Lee W, et al. Should bilateral uterine artery notching be used in the risk assessment for preeclampsia, small-for-gestational-age, and gestational hypertension? *J Ultrasound Med.* 2010 Jul;29(7):1103-15.
1039. Espinoza J, Romero R, Nien JK, Gomez R, Kusanovic JP, Goncalves LF, et al. Identification of patients at risk for early onset and/or severe preeclampsia with the use of uterine artery Doppler velocimetry and placental growth factor. *Am J Obstet Gynecol.* 2007 Apr;196(4):326.e1-13.
1040. Esposito T, Lea RA, Maher BH, Moses D, Cox HC, Magliocca S, et al. Unique X-linked familial FSGS with co-segregating heart block disorder is associated with a mutation in the NXF5 gene. *Human Molecular Genetics.* 2013 September;22(18):3654-66.
1041. Essen B, Hanson BS, Ostergren PO, Lindquist PG, Gudmundsson S. Increased perinatal mortality

- among sub-Saharan immigrants in a city-population in Sweden. *Acta Obstet Gynecol Scand*. 2000 Sep;79(9):737-43.
1042. Estensen M, Gude E, Ekmehag B, Lommi J, Bjortuft O, Mortensen S, et al. Pregnancy in heart- and heart/lung recipients can be problematic. *Scandinavian cardiovascular journal : SCJ*. 2011 Dec;45(6):349-53.
1043. Etemadifar M, Dehghani L, Tahani S, Toghianifar N, Rahaimi M, Eskandari N. Neurological manifestations in patients with antiphospholipid syndrome. *Iranian Journal of Neurology*. 2013;12(4):172-5.
1044. Eure CR, Lindsay MK, Graves WL. Risk of adverse pregnancy outcomes in young adolescent parturients in an inner-city hospital. *Am J Obstet Gynecol*. 2002 May;186(5):918-20.
1045. Evans CS, Gooch L, Flotta D, Lykins D, Powers RW, Landsittel D, et al. Cardiovascular system during the postpartum state in women with a history of preeclampsia. *Hypertension*. 2011 Jul;58(1):57-62.
1046. Everett TR, Mahendru AA, McEniery CM, Wilkinson IB, Lees CC. Raised uterine artery impedance is associated with increased maternal arterial stiffness in the late second trimester. *Placenta*. 2012 Jul;33(7):572-7.
1047. Evers IM, de Valk HW, Visser GH. Risk of complications of pregnancy in women with type 1 diabetes: nationwide prospective study in the Netherlands. *Bmj*. 2004 Apr 17;328(7445):915.
1048. Evgenov OV, Sager G, Bjertnaes LJ. Methylene blue reduces lung fluid filtration during the early phase of endotoxemia in awake sheep. *Crit Care Med*. 2001 Feb;29(2):374-9.
1049. Evrenos AN, Cakir Gungor AN, Gulerman C, Cosar E. Obstetric outcomes of patients with abortus imminens in the first trimester. *Arch Gynecol Obstet*. 2014 Mar;289(3):499-504.
1050. Ezimokhai M, Rizk DE, Thomas L. Maternal risk factors for abnormal vascular coiling of the umbilical cord. *Am J Perinatol*. 2000;17(8):441-5.
1051. Ezugwu EC, Agu PU, Nwoke MO, Ezugwu FO. Reducing maternal deaths in a low resource setting in Nigeria. *Nigerian journal of clinical practice*. 2014 Jan-Feb;17(1):62-6.
1052. Ezugwu EC, Onah HE, Ezugwu FO, Okafor, II. Maternal mortality in a transitional hospital in Enugu, south east Nigeria. *Afr J Reprod Health*. 2009 Dec;13(4):67-72.
1053. Fabbri S, Alston M, Metz TD, Krull M. Evaluation of the utility of baseline serum hepatic and renal testing in pregnant patients with chronic hypertension. *The Journal of reproductive medicine*. 2014 2014;59(9-10):471-5.
1054. Facchinetti F, Alberico S, Benedetto C, Cetin I, Cozzolino S, Di Renzo GC, et al. A multicenter, case-control study on risk factors for antepartum stillbirth. *Journal of Maternal-Fetal and Neonatal Medicine*. 2011 March;24(3):407-10.
1055. Facchinetti F, Allais G, Nappi RE, D'Amico R, Marozio L, Bertozzi L, et al. Migraine is a risk factor for hypertensive disorders in pregnancy: a prospective cohort study. *Cephalalgia*. 2009 Mar;29(3):286-92.
1056. Facchinetti F, Marozio L, Frusca T, Grandone E, Venturini P, Tiscia GL, et al. Maternal thrombophilia and the risk of recurrence of preeclampsia. *Am J Obstet Gynecol*. 2009 Jan;200(1):46.e1-5.
1057. Facco FL, Ouyang DW, Zee PC, Grobman WA. Development of a pregnancy-specific screening tool for sleep apnea. *Journal of Clinical Sleep Medicine*. 2012 15 Aug;8(4):389-94.
1058. Facco FL, Ouyang DW, Zee PC, Grobman WA. Sleep disordered breathing in a high-risk cohort prevalence and severity across pregnancy. *Am J Perinatol*. 2014 Nov;31(10):899-904.
1059. Facco FL, Ouyang DW, Zee PC, Strohl AE, Gonzalez AB, Lim C, et al. Implications of sleep-disordered breathing in pregnancy. *Am J Obstet Gynecol*. 2014 Jun;210(6):559.e1-6.
1060. Facco FL, Parker CB, Reddy UM, Silver RM, Louis JM, Basner RC, et al. NuMoM2b Sleep-Disordered Breathing study: objectives and methods. *Am J Obstet Gynecol*. 2015

Apr;212(4):542.e1-127.

1061. Fadl HE, Ostlund IK, Hanson US. Outcomes of gestational diabetes in Sweden depending on country of birth. *Acta Obstet Gynecol Scand*. 2012 Nov;91(11):1326-30.
1062. Fadl HE, Ostlund IK, Magnuson AF, Hanson US. Maternal and neonatal outcomes and time trends of gestational diabetes mellitus in Sweden from 1991 to 2003. *Diabetic medicine : a journal of the British Diabetic Association*. 2010 Apr;27(4):436-41.
1063. Fahim F, Nabeel N, Javed S. Seasonal variation in the occurrence of eclampsia. *Pakistan Journal of Medical and Health Sciences*. 2014 01 Oct;8(4):1056-9.
1064. Fainaru O, Lichtenberg D, Pinchuk I, Almog B, Gamzu R, Kupferminc M. Preeclampsia is associated with increased susceptibility of serum lipids to copper-induced peroxidation in vitro. *Acta Obstet Gynecol Scand*. 2003 Aug;82(8):711-5.
1065. Faivre L, Meerpohl J, Da Costa L, Marie I, Nouvel C, Gnekow A, et al. High-risk pregnancies in Diamond-Blackfan anemia: a survey of 64 pregnancies from the French and German registries. *Haematologica*. 2006 Apr;91(4):530-3.
1066. Faiz AS, Demissie K, Ananth CV, Rhoads GG. Risk of abruptio placentae by region of birth and residence among African-American women in the USA. *Ethnicity and Health*. 2001;6(3-4):247-53.
1067. Fakhouri F, Roumenina L, Provot F, Sallee M, Caillard S, Couzi L, et al. Pregnancy-associated hemolytic uremic syndrome revisited in the era of complement gene mutations. *Journal of the American Society of Nephrology : JASN*. 2010 May;21(5):859-67.
1068. Falah N, Haas DM. Antenatal corticosteroid therapy: Current strategies and identifying mediators and markers for response. *Seminars in Perinatology*. 2014 01 Dec;38(8):528-33.
1069. Fallahi M, Keshmand G, Bassir MF. Effects of delivery mode on short-term neonatal outcomes. *Iranian Journal of Neonatology*. 2014 Summer;5(2):25-8.
1070. Familoni OB, Adefuye PO, Olunuga TO. Pattern and factors affecting the outcome of pregnancy in hypertensive patients. *Journal of the National Medical Association*. 2004 December;96(12):1626-31.
1071. Fan Z, Yang H, Gao X, Lintu H, Sun W. Pregnancy outcome in gestational diabetes. *International Journal of Gynecology and Obstetrics*. 2006 July;94(1):12-6.
1072. Fang YMV, MacKeen D, Egan JFX, Zelop CM. Insulin glargine compared with Neutral Protamine Hagedorn insulin in the treatment of pregnant diabetics. *Journal of Maternal-Fetal and Neonatal Medicine*. 2009;22(3):249-53.
1073. Faponle AF, Makinde ON. Caesarean section: intra-operative blood loss and its restitution. *East Afr Med J*. 2007 Jan;84(1):31-4.
1074. Fareed YYZ, Al-Ghazali BS, Mankhi HK. Assessment of the relationship between luekotriene B4 and luekotriene D4 levels in prediction of preeclampsia. *International Journal of Pharmaceutical Sciences Review and Research*. 2015;31(2):182-5.
1075. Farina A, Hasegawa J, Raffaelli S, Ceccarini C, Rapacchia G, Pittalis MC, et al. The association between preeclampsia and placental disruption induced by chorionic villous sampling. *Prenatal diagnosis*. 2010 Jun;30(6):571-4.
1076. Farina A, Rapacchia G, Freni Sterrantino A, Pula G, Morano D, Rizzo N. Prospective evaluation of ultrasound and biochemical-based multivariable models for the prediction of late pre-eclampsia. *Prenatal diagnosis*. 2011 Dec;31(12):1147-52.
1077. Farina A, Sekizawa A, De Sanctis P, Purwosunu Y, Okai T, Cha DH, et al. Gene expression in chorionic villous samples at 11 weeks' gestation from women destined to develop preeclampsia. *Prenatal diagnosis*. 2008 Oct;28(10):956-61.
1078. Farina A, Sekizawa A, Iwasaki M, Matsuoka R, Ichizuka K, Okai T. Total cell-free DNA (beta-globin gene) distribution in maternal plasma at the second trimester: A new prospective for preeclampsia screening. *Prenatal diagnosis*. 2004 September;24(9):722-6.
1079. Farina A, Zucchini C, Sekizawa A, Purwosunu Y, de Sanctis P, Santarsiero G, et al. Performance of

messenger RNAs circulating in maternal blood in the prediction of preeclampsia at 10-14 weeks. *Am J Obstet Gynecol.* 2010 Dec;203(6):575.e1-7.

1080. Farley DM, O'Hara MH, Frazier LM, Stenbridge TW. Urgent delivery, diabetes and shoulder dystocia: What can we learn from observational research? *Expert Review of Obstetrics and Gynecology.* 2008 May;3(3):301-15.

1081. Fatemi A, Fard RM, Sayedbonakdar Z, Farajzadegan Z, Saber M. The role of lupus nephritis in development of adverse maternal and fetal outcomes during pregnancy. *International Journal of Preventive Medicine.* 2013 September;4(9):1004-10.

1082. Faupel-Badger JM, Hsieh CC, Troisi R, Lagiou P, Potischman N. Plasma volume expansion in pregnancy: implications for biomarkers in population studies. *Cancer epidemiology, biomarkers & prevention : a publication of the American Association for Cancer Research, cosponsored by the American Society of Preventive Oncology.* 2007 Sep;16(9):1720-3.

1083. Faupel-Badger JM, McElrath TF, Lauria M, Houghton LC, Lim KH, Parry S, et al. Maternal circulating angiogenic factors in twin and singleton pregnancies. *American Journal of Obstetrics and Gynecology.* 2015 01 May;212(5):636.e1-.e2.

1084. Favaro A, Tenconi E, Santonastaso P. Perinatal factors and the risk of developing anorexia nervosa and bulimia nervosa. *Arch Gen Psychiatry.* 2006 Jan;63(1):82-8.

1085. Favilli A, Pericoli S, Acanfora MM, Bini V, Di Renzo GC, Gerli S. Pregnancy outcome in women aged 40 years or more. *The journal of maternal-fetal & neonatal medicine : the official journal of the European Association of Perinatal Medicine, the Federation of Asia and Oceania Perinatal Societies, the International Society of Perinatal Obstet.* 2012 Aug;25(8):1260-3.

1086. Fawad A, Naz H, Islam A, Zaffar S, Abbasi AU. Maternal mortality in a tertiary care hospital. *Journal of Ayub Medical College, Abbottabad : JAMC.* 2011 2011;23(1):92-5.

1087. Fayet-Mello A, Buclin T, Guignard N, Cruchon S, Cavassini M, Grawe C, et al. Free and total plasma levels of lopinavir during pregnancy, at delivery and postpartum: Implications for dosage adjustments in pregnant women. *Antiviral Therapy.* 2013;18(2):171-82.

1088. Fedakar A, Aydogdu C. Clinical features of neonates treated in the intensive care unit for respiratory distress. *Turkish Journal of Pediatrics.* 2011;53(2):173-9.

1089. Feig DS, Razzaq A, Sykora K, Hux JE, Anderson GM. Trends in deliveries, prenatal care, and obstetrical complications in women with pregestational diabetes: a population-based study in Ontario, Canada, 1996-2001. *Diabetes Care.* 2006 Feb;29(2):232-5.

1090. Feig DS, Shah BR, Lipscombe LL, Wu CF, Ray JG, Lowe J, et al. Preeclampsia as a risk factor for diabetes: a population-based cohort study. *PLoS Med.* 2013;10(4):e1001425.

1091. Fejzo MS, Macgibbon KW, Romero R, Goodwin TM, Mullin PM. Recurrence Risk of Hyperemesis Gravidarum. *Journal of Midwifery and Women's Health.* 2011 March-April;56(2):132-6.

1092. Fejzo MS, Poursharif B, Korst LM, Munch S, MacGibbon KW, Romero R, et al. Symptoms and pregnancy outcomes associated with extreme weight loss among women with hyperemesis gravidarum. *Journal of women's health (2002).* 2009 Dec;18(12):1981-7.

1093. Fejzo MS, Romero R, Goodwin TM. Patients with a history of hyperemesis gravidarum have similar symptoms during egg stimulation and develop ovarian hyperstimulation syndrome: case series. *Fertility and sterility.* 2010 01 Jan;93(1):267.e9-.e11.

1094. Fell DB, Dodds L, Joseph KS, Allen VM, Butler B. Risk factors for hyperemesis gravidarum requiring hospital admission during pregnancy. *Obstetrics and Gynecology.* 2006 February;107(2 1):277-84.

1095. Femitha P, Bhat BV. Early neonatal outcome in late preterms. *Indian Journal of Pediatrics.* 2012 August;79(8):1019-24.

1096. Fenicia L, Da Dalt L, Anniballi F, Franciosa G, Zanconato S, Aureli P. A case of infant botulism due to neurotoxic Clostridium butyricum type E associated with Clostridium difficile colitis. *European*



journal of clinical microbiology & infectious diseases : official publication of the European Society of Clinical Microbiology. 2002 Oct;21(10):736-8.

1097. Fenstad MH, Johnson MP, Loset M, Mundal SB, Roten LT, Eide IP, et al. STOX2 but not STOX1 is differentially expressed in decidua from pre-eclamptic women: data from the Second Nord-Trondelag Health Study. *Mol Hum Reprod*. 2010 Dec;16(12):960-8.

1098. Fenstad MH, Johnson MP, Roten LT, Aas PA, Forsmo S, Klepper K, et al. Genetic and molecular functional characterization of variants within TNFSF13B, a positional candidate preeclampsia susceptibility gene on 13q. *PloS one*. 2010;5(9).

1099. Fenton JJ, Baumeister LM, Fogarty J. Active management of the third stage of labor among American Indian women. *Fam Med*. 2005 Jun;37(6):410-4.

1100. Fenzl V, Flegar-Mestric Z, Perkovic S, Andric L, Tatzber F, Zarkovic N, et al. Trace elements and oxidative stress in hypertensive disorders of pregnancy. *Arch Gynecol Obstet*. 2013 Jan;287(1):19-24.

1101. Ferguson KK, McElrath TF, Ko YA, Mukherjee B, Meeker JD. Variability in urinary phthalate metabolite levels across pregnancy and sensitive windows of exposure for the risk of preterm birth. *Environ Int*. 2014 Sep;70:118-24.

1102. Ferland S, Bujold E, Giguere Y, Girard M, Demers S, Forest JC. Association between physical activity in early pregnancy and markers of placental growth and function. *Journal of obstetrics and gynaecology Canada : JOGC = Journal d'obstetrique et gynecologie du Canada : JOGC*. 2013 01 Sep;35(9):787-92.

1103. Fernandez-Brando RJ, Bentancor LV, Mejias MP, Ramos MV, Exeni A, Exeni C, et al. Antibody response to Shiga toxins in Argentinean children with enteropathic hemolytic uremic syndrome at acute and long-term follow-up periods. *PloS one*. 2011;6(4):e19136.

1104. Fernando D, Halliday JL, Breheny S, Healy DL. Outcomes of singleton births after blastocyst versus nonblastocyst transfer in assisted reproductive technology. *Fertility and sterility*. 2012 Mar;97(3):579-84.

1105. Feroze U, Kalantar-Zadeh K, Sterling KA, Molnar MZ, Noori N, Benner D, et al. Examining associations of circulating endotoxin with nutritional status, inflammation, and mortality in hemodialysis patients. *Journal of renal nutrition : the official journal of the Council on Renal Nutrition of the National Kidney Foundation*. 2012 May;22(3):317-26.

1106. Ferrazzani S, Merola A, De Carolis S, Carducci B, Paradisi G, Caruso A. Birth weight in pre-eclamptic and normotensive twin pregnancies: an analysis of discordance and growth restriction. *Human reproduction*. 2000 Jan;15(1):210-7.

1107. Ferrazzi E, Bozzo M, Rigano S, Bellotti M, Morabito A, Pardi G, et al. Temporal sequence of abnormal Doppler changes in the peripheral and central circulatory systems of the severely growth-restricted fetus. *Ultrasound in Obstetrics and Gynecology*. 2002;19(2):140-6.

1108. Ferre N, Camps J, Fernandez-Ballart J, Arijia V, Murphy MM, Marsillach J, et al. Longitudinal changes in serum paraoxonase-1 activity throughout normal pregnancy. *Clinical Chemistry and Laboratory Medicine*. 2006 01 Jul;44(7):880-2.

1109. Fesslova VME, Villa L, Chessa M, Butera G, Salmona S, Acaia B. Prospective evaluation from single centre of pregnancy in women with congenital heart disease. *International Journal of Cardiology*. 2009 09 Jan;131(2):257-64.

1110. Fewtrell MS, Cole TJ, Bishop NJ, Lucas A. Neonatal factors predicting childhood height in preterm infants: Evidence for a persisting effect of early metabolic bone disease? *Journal of Pediatrics*. 2000;137(5):668-73.

1111. Figueiro-Filho EA, de Oliveira VM, Breda I, Coelho LR, Ferreira CM. Usefulness of a scoring system on perinatal outcomes in pregnant women with thrombophilia in the effectiveness of an enoxaparin-based intervention

Eficacia de intervencao com enoxaparina baseada em sistema de pontuacao nos desfechos perinatais de

- gestantes com trombofilias. *Revista Brasileira de Ginecologia e Obstetricia*. 2012 October;34(10):459-65.
1112. Figueiro-Filho EA, de Oliveveira VM, Coelho LR, Breda I. Serum markers of inherited thrombophilia and antiphospholipid antibodies in pregnant women with previous history of severe pre-eclampsia  
Marcadores sericos de trombofilias hereditarias e anticorpos antifosfolipides em gestantes com antecedentes de pre-eclampsia grave. *Revista Brasileira de Ginecologia e Obstetricia*. 2012 January;34(1):40-6.
1113. Figueras F, Cruz-Martinez R, Sanz-Cortes M, Arranz A, Illa M, Botet F, et al. Neurobehavioral outcomes in preterm, growth-restricted infants with and without prenatal advanced signs of brain-sparing. *Ultrasound in obstetrics & gynecology : the official journal of the International Society of Ultrasound in Obstetrics and Gynecology*. 2011 Sep;38(3):288-94.
1114. Filetti LC, Imudia AN, Al-Safi Z, Hobson DT, Awonuga AO, Bahado-Singh RO. New onset delayed postpartum preeclampsia: different disorders? *The journal of maternal-fetal & neonatal medicine : the official journal of the European Association of Perinatal Medicine, the Federation of Asia and Oceania Perinatal Societies, the International Society of Perinatal Obstet*. 2012 Jul;25(7):957-60.
1115. Filho DSC, do Amaral Correa JO, dos Santos Ramos P, de Oliveira Montessi M, Aarestrup BJV, Aarestrup FM. Body weight gain and serum leptin levels of non-overweight and overweight/obese pregnant women. *Medical Science Monitor*. 2013 22 Nov;19:1043-9.
1116. Finnstrom O, Kallen B, Lindam A, Nilsson E, Nygren KG, Olausson PO. Maternal and child outcome after in vitro fertilization--a review of 25 years of population-based data from Sweden. *Acta Obstet Gynecol Scand*. 2011 May;90(5):494-500.
1117. Finnstrom O, Kallen B, Lindam A, Nilsson E, Nygren KG, Olausson PO. Maternal and child outcome after in vitro fertilization - A review of 25 years of population-based data from Sweden. *Acta Obstetricia et Gynecologica Scandinavica*. 2011 May;90(5):494-500.
1118. Firoz T, Melnik T. Postpartum evaluation and long term implications. *Best Practice and Research: Clinical Obstetrics and Gynaecology*. 2011 August;25(4):549-61.
1119. Fischer MJ, Lehnerz SD, Hebert JR, Parikh CR. Kidney disease is an independent risk factor for adverse fetal and maternal outcomes in pregnancy. *American journal of kidney diseases : the official journal of the National Kidney Foundation*. 2004 Mar;43(3):415-23.
1120. Fischer T, Schobel HP, Frank H, Andreae M, Schneider KT, Heusser K. Pregnancy-induced sympathetic overactivity: a precursor of preeclampsia. *European journal of clinical investigation*. 2004 Jun;34(6):443-8.
1121. Fischer-Betz R, Specker C, Brinks R, Schneider M. Pregnancy outcome in patients with antiphospholipid syndrome after cerebral ischaemic events: an observational study. *Lupus*. 2012 Oct;21(11):1183-9.
1122. Fitzgerald B, Levytska K, Kingdom J, Walker M, Baczyk D, Keating S. Villous trophoblast abnormalities in extremely preterm deliveries with elevated second trimester maternal serum hCG or inhibin-A. *Placenta*. 2011 Apr;32(4):339-45.
1123. Fitzpatrick E, Johnson MP, Dyer TD, Forrest S, Elliott K, Blangero J, et al. Genetic association of the activin A receptor gene (ACVR2A) and pre-eclampsia. *Mol Hum Reprod*. 2009 Mar;15(3):195-204.
1124. Fleming SM, O'Gorman T, Finn J, Grimes H, Daly K, Morrison JJ. Cardiac troponin I in pre-eclampsia and gestational hypertension. *Bjog*. 2000 Nov;107(11):1417-20.
1125. Fletcher JJ, Kramer AH, Bleck TP, Solenski NJ. Overlapping features of eclampsia and postpartum angiopathy. *Neurocrit Care*. 2009;11(2):199-209.
1126. Flick AA, Brookfield KF, de la Torre L, Tudela CM, Duthely L, Gonzalez-Quintero VH. Excessive weight gain among obese women and pregnancy outcomes. *Am J Perinatol*. 2010 Apr;27(4):333-8.
1127. Flood-Nichols SK, Kazanjian AA, Tinnemore D, Gafken PR, Ogata Y, Napolitano PG, et al. Aberrant glycosylation of plasma proteins in severe preeclampsia promotes monocyte adhesion. *Reprod Sci*. 2014

Feb;21(2):204-14.

1128. Flood-Nichols SK, Stallings JD, Gotkin JL, Tinnemore D, Napolitano PG, Ippolito DL. Elevated ratio of maternal plasma ApoCIII to ApoCII in preeclampsia. *Reprod Sci*. 2011 May;18(5):493-502.

1129. Flood-Nichols SK, Tinnemore D, Huang RR, Napolitano PG, Ippolito DL. Vitamin D deficiency in early pregnancy. *PloS one*. 2015 21 Apr;10(4).

1130. Flores KF, Robledo CA, Hwang BS, Leishear K, Laughon Grantz K, Mendola P. Does maternal asthma contribute to racial/ethnic disparities in obstetrical and neonatal complications? *Annals of epidemiology*. 2015 01 Jun;25(6):392-7.

1131. Florica M, Stephansson O, Nordstrom L. Indications associated with increased cesarean section rates in a Swedish hospital. *International journal of gynaecology and obstetrics: the official organ of the International Federation of Gynaecology and Obstetrics*. 2006 Feb;92(2):181-5.

1132. Florio P, D'Aniello G, Sabatini L, Severi FM, Fineschi D, Bocchi C, et al. Factor II: C activity and uterine artery Doppler evaluation to improve the early prediction of pre-eclampsia on women with gestational hypertension. *J Hypertens*. 2005 Jan;23(1):141-6.

1133. Florio P, Imperatore A, Sanseverino F, Torricelli M, Reis FM, Lowry PJ, et al. The measurement of maternal plasma corticotropin-releasing factor (CRF) and CRF-binding protein improves the early prediction of preeclampsia. *The Journal of clinical endocrinology and metabolism*. 2004 Sep;89(9):4673-7.

1134. Fong A, Chau CT, Pan D, Ogunyemi DA. Clinical morbidities, trends, and demographics of eclampsia: a population-based study. *Am J Obstet Gynecol*. 2013 Sep;209(3):229.e1-7.

1135. Fong A, Serra A, Herrero T, Pan D, Ogunyemi D. Pre-gestational versus gestational diabetes: a population based study on clinical and demographic differences. *J Diabetes Complications*. 2014 Jan-Feb;28(1):29-34.

1136. Fonseca LT, Silveira RC, Procianoy RS. Ureaplasma bacteremia in very low birth weight infants in Brazil. *The Pediatric infectious disease journal*. 2011 Dec;30(12):1052-5.

1137. Fontenot MT, Lewis DF, Barton CB, Jones EM, Moore JA, Evans AT. Abruptio placentae associated with misoprostol use in women with preeclampsia. *The Journal of reproductive medicine*. 2005 Sep;50(9):653-8.

1138. Foong SC, Pollard JK. Eclampsia in Southern Alberta: is there a role for seizure prophylaxis in all women with gestational hypertension? *Journal of obstetrics and gynaecology Canada : JOGC = Journal d'obstetrique et gynecologie du Canada : JOGC*. 2003 May;25(5):385-9.

1139. Forest JC, Girouard J, Masse J, Moutquin JM, Kharfi A, Ness RB, et al. Early occurrence of metabolic syndrome after hypertension in pregnancy. *Obstet Gynecol*. 2005 Jun;105(6):1373-80.

1140. Forest JC, Theriault S, Masse J, Bujold E, Giguere Y. Soluble Fms-like tyrosine kinase-1 to placental growth factor ratio in mid-pregnancy as a predictor of preterm preeclampsia in asymptomatic pregnant women. *Clin Chem Lab Med*. 2014 Aug;52(8):1169-78.

1141. Forman MR, Cantwell MM, Ronckers C, Zhang Y. Through the looking glass at early-life exposures and breast cancer risk. *Cancer investigation*. 2005;23(7):609-24.

1142. Fortes Filho JB, Costa MC, Eckert GU, Santos PG, Silveira RC, Procianoy RS. Maternal preeclampsia protects preterm infants against severe retinopathy of prematurity. *The Journal of pediatrics*. 2011 Mar;158(3):372-6.

1143. Fortner RT, Pekow P, Solomon CG, Markenson G, Chasan-Taber L. Prepregnancy body mass index, gestational weight gain, and risk of hypertensive pregnancy among Latina women. *Am J Obstet Gynecol*. 2009 Feb;200(2):167.e1-7.

1144. Fortner RT, Pekow PS, Whitcomb BW, Sievert LL, Markenson G, Chasan-Taber L. Physical activity and hypertensive disorders of pregnancy among Hispanic women. *Med Sci Sports Exerc*. 2011 Apr;43(4):639-46.

1145. Fox CE, Lash GE, Pretlove SJ, Chan BC, Holder R, Kilby MD. Maternal plasma and amniotic fluid

cytokines in monochorionic, diamniotic twin pregnancies complicated by twin-to-twin transfusion syndrome. *Fetal Diagn Ther.* 2014;35(4):280-8.

1146. Fox NS, Gupta S, Melka S, Silverstein M, Bender S, Saltzman DH, et al. Risk factors for cesarean delivery in twin pregnancies attempting vaginal delivery. *American Journal of Obstetrics and Gynecology.* 2015 01 Jan;212(1):106.e1-.e5.

1147. Fox NS, Rebarber A, Dunham SM, Saltzman DH. Outcomes of multiple gestations with advanced maternal age. *The journal of maternal-fetal & neonatal medicine : the official journal of the European Association of Perinatal Medicine, the Federation of Asia and Oceania Perinatal Societies, the International Society of Perinatal Obstet.* 2009 Jul;22(7):593-6.

1148. Fox NS, Roman AS, Saltzman DH, Klausner CK, Rebarber A. Obesity and adverse pregnancy outcomes in twin pregnancies. *The journal of maternal-fetal & neonatal medicine : the official journal of the European Association of Perinatal Medicine, the Federation of Asia and Oceania Perinatal Societies, the International Society of Perinatal Obstet.* 2014 Mar;27(4):355-9.

1149. Fox NS, Roman AS, Stern EM, Gerber RS, Saltzman DH, Rebarber A. Type of congenital uterine anomaly and adverse pregnancy outcomes. *The journal of maternal-fetal & neonatal medicine : the official journal of the European Association of Perinatal Medicine, the Federation of Asia and Oceania Perinatal Societies, the International Society of Perinatal Obstet.* 2014 Jun;27(9):949-53.

1150. Fox NS, Saltzman DH, Oppal S, Klausner CK, Gupta S, Rebarber A. The relationship between preeclampsia and intrauterine growth restriction in twin pregnancies. *Am J Obstet Gynecol.* 2014 Oct;211(4):422.e1-5.

1151. Fox NS, Stern E, Gupta S, Saltzman DH, Klausner CK, Rebarber A. Preterm birth or small for gestational age in a singleton pregnancy and risk of recurrence in a subsequent twin pregnancy. *Obstetrics and Gynecology.* 2015 24 Apr;125(4):870-5.

1152. Framarino dei Malatesta M, Rossi M, Rocca B, Iappelli M, Poli L, Piccioni MG, et al. Fertility Following Solid Organ Transplantation. *Transplantation Proceedings.* 2007 July/August;39(6):2001-4.

1153. Franceschini N, Savitz DA, Kaufman JS, Thorp JM. Maternal urine albumin excretion and pregnancy outcome. *American journal of kidney diseases : the official journal of the National Kidney Foundation.* 2005 Jun;45(6):1010-8.

1154. Francini-Pesenti F, Brocadello F, Manara R, Santelli L, Laroni A, Caregato L. Wernicke's syndrome during parenteral feeding: Not an unusual complication. *Nutrition.* 2009 February;25(2):142-6.

1155. Francisco AM, Arnon SS. Clinical mimics of infant botulism. *Pediatrics.* 2007 Apr;119(4):826-8.

1156. Frank KA, Buchmann EJ, Schackis RC. Does human immunodeficiency virus infection protect against preeclampsia-eclampsia? *Obstet Gynecol.* 2004 Aug;104(2):238-42.

1157. Franklin KA, Holmgren PA, Jonsson F, Poromaa N, Stenlund H, Svanborg E. Snoring, pregnancy-induced hypertension, and growth retardation of the fetus. *Chest.* 2000;117(1):137-41.

1158. Franz MB, Burgmann M, Neubauer A, Zeisler H, Sanani R, Gottsauner-Wolf M, et al. Augmentation index and pulse wave velocity in normotensive and pre-eclamptic pregnancies. *Acta Obstet Gynecol Scand.* 2013 Aug;92(8):960-6.

1159. Fraser A, Nelson SM, Macdonald-Wallis C, Cherry L, Butler E, Sattar N, et al. Associations of pregnancy complications with calculated cardiovascular disease risk and cardiovascular risk factors in middle age: the Avon Longitudinal Study of Parents and Children. *Circulation.* 2012 Mar 20;125(11):1367-80.

1160. Fraser A, Nelson SM, Macdonald-Wallis C, Sattar N, Lawlor DA. Hypertensive disorders of pregnancy and cardiometabolic health in adolescent offspring. *Hypertension.* 2013 Sep;62(3):614-20.

1161. Fratelli N, Rampello S, Guala M, Platto C, Frusca T. Transabdominal uterine artery Doppler between 11 and 14 weeks of gestation for the prediction of outcome in high-risk pregnancies. *The journal of maternal-fetal & neonatal medicine : the official journal of the European Association of Perinatal Medicine, the Federation of Asia and Oceania Perinatal Societies, the International Society of*

Perinatal Obstet. 2008 Jun;21(6):403-6.

1162. Frederick IO, Qiu C, Sorensen TK, Enquobahrie DA, Williams MA. The prevalence and correlates of habitual snoring during pregnancy. *Sleep & breathing = Schlaf & Atmung*. 2013 May;17(2):541-7.

1163. Frederick IO, Rudra CB, Miller RS, Foster JC, Williams MA. Adult weight change, weight cycling, and prepregnancy obesity in relation to risk of preeclampsia. *Epidemiology (Cambridge, Mass)*. 2006 Jul;17(4):428-34.

1164. Freeman M, Ghidini A, Spong CY, Tchabo N, Bannon PZ, Pezzullo JC. Does air travel affect pregnancy outcome? *Arch Gynecol Obstet*. 2004 May;269(4):274-7.

1165. Freeman MP, Cohen LS, McInerney K. Omega-3 fatty acids and gestational length in a high-risk psychiatric population due to psychiatric morbidity and medication exposure during pregnancy. *Journal of Clinical Psychopharmacology*. 2014 October;34(5):627-32.

1166. Freibert SM, Mannino DM, Bush H, Crofford LJ. The association of adverse pregnancy events and cardiovascular disease in women 50 years of age and older. *J Womens Health (Larchmt)*. 2011 Feb;20(2):287-93.

1167. Friedlander Y, Paltiel O, Manor O, Deutsch L, Yanetz R, Calderon-Margalit R, et al. Birthweight of offspring and mortality of parents: the Jerusalem perinatal study cohort. *Annals of epidemiology*. 2007 Nov;17(11):914-22.

1168. Friedman AM, Ananth CV, Lu YS, D'Alton ME, Wright JD. Underuse of postcesarean thromboembolism prophylaxis. *Obstetrics and Gynecology*. 2013 December;122(6):1197-204.

1169. Friedman AM, Ananth CV, Prendergast E, D'Alton ME, Wright JD. Evaluation of third-degree and fourth-degree laceration rates as quality indicators. *Obstetrics and Gynecology*. 2015 24 Apr;125(4):927-37.

1170. Friedman LS, Paulsen EK, Schadt KA, Brigatti KW, Driscoll DA, Farmer JM, et al. Pregnancy with Friedreich ataxia: a retrospective review of medical risks and psychosocial implications. *Am J Obstet Gynecol*. 2010 Sep;203(3):224.e1-5.

1171. Fruscalzo A, Bertozzi S, Londero AP, Biasioli A, Driul L, Kiesel L, et al. Menstrual abnormalities and predisposition to pregnancy-related hypertensive disorders: a retrospective study. *Gynecological endocrinology : the official journal of the International Society of Gynecological Endocrinology*. 2010 Jun;26(6):445-50.

1172. Fruscalzo A, Londero AP, Biasizzo J, Bortolotti N, Bertozzi S, Curcio F, et al. Second trimester amniotic fluid retinol in patients developing preeclampsia. *Archives of Gynecology and Obstetrics*. 2015;291(4):831-6.

1173. Fruscalzo A, Schmitz R, Klockenbusch W, Kohler G, Londero AP, Siwetz M, et al. Human placental transthyretin in fetal growth restriction in combination with preeclampsia and the HELLP syndrome. *Histochem Cell Biol*. 2012 Dec;138(6):925-32.

1174. Fugate JE, Ameriso SF, Ortiz G, Schottlaender LV, Wijdicks EFM, Flemming KD, et al. Variable presentations of postpartum angiopathy. *Stroke*. 2012 March;43(3):670-6.

1175. Fugate JE, Claassen DO, Cloft HJ, Kallmes DF, Kozak OS, Rabinstein AA. Posterior reversible encephalopathy syndrome: associated clinical and radiologic findings. *Mayo Clin Proc*. 2010 May;85(5):427-32.

1176. Funai EF, Friedlander Y, Paltiel O, Tiram E, Xue X, Deutsch L, et al. Long-term mortality after preeclampsia. *Epidemiology (Cambridge, Mass)*. 2005 Mar;16(2):206-15.

1177. Funai EF, Paltiel OB, Malaspina D, Friedlander Y, Deutsch L, Harlap S. Risk factors for pre-eclampsia in nulliparous and parous women: The Jerusalem Perinatal Study. *Paediatric and perinatal epidemiology*. 2005 January;19(1):59-68.

1178. Fung TY, Sahota DS, Lau TK, Leung TY, Chan LW, Chung TK. Placental site in the second trimester of pregnancy and its association with subsequent obstetric outcome. *Prenatal diagnosis*. 2011 Jun;31(6):548-54.

1179. Furness D, Fenech M, Dekker G, Khong TY, Roberts C, Hague W. Folate, vitamin B12, vitamin B6 and homocysteine: impact on pregnancy outcome. *Maternal & child nutrition*. 2013 Apr;9(2):155-66.
1180. Furness DL, Dekker GA, Hague WM, Khong TY, Fenech MF. Increased lymphocyte micronucleus frequency in early pregnancy is associated prospectively with pre-eclampsia and/or intrauterine growth restriction. *Mutagenesis*. 2010 Sep;25(5):489-98.
1181. Furness DL, Fenech MF, Khong YT, Romero R, Dekker GA. One-carbon metabolism enzyme polymorphisms and uteroplacental insufficiency. *Am J Obstet Gynecol*. 2008 Sep;199(3):276.e1-8.
1182. Furness DL, Yasin N, Dekker GA, Thompson SD, Roberts CT. Maternal red blood cell folate concentration at 10-12 weeks gestation and pregnancy outcome. *The journal of maternal-fetal & neonatal medicine : the official journal of the European Association of Perinatal Medicine, the Federation of Asia and Oceania Perinatal Societies, the International Society of Perinatal Obstet*. 2012 Aug;25(8):1423-7.
1183. Furukawa N, Akasaka J, Shigemitsu A, Sasaki Y, Nagai A, Kawaguchi R, et al. Evaluation of the relation between patient characteristics and the state of chemotherapy-induced nausea and vomiting in patients with gynecologic cancer receiving paclitaxel and carboplatin. *Archives of Gynecology and Obstetrics*. 2014;289(4):859-64.
1184. Furukawa S, Sameshima H, Ikenoue T. Intrapartum late deceleration develops more frequently in pre-eclamptic women with severe proteinuria. *The journal of obstetrics and gynaecology research*. 2006 Feb;32(1):68-73.
1185. Furuta M, Sandall J, Cooper D, Bick D. The relationship between severe maternal morbidity and psychological health symptoms at 6-8 weeks postpartum: A prospective cohort study in one English maternity unit. *BMC pregnancy and childbirth*. 2014 07 Apr;14(1).
1186. Gabbay A, Tzur T, Weintraub AY, Shoham-Vardi I, Sergienko R, Sheiner E. Calcium level during the first trimester of pregnancy as a predictor of preeclampsia. *Hypertension in pregnancy*. 2014 August;33(3):311-21.
1187. Gagliardi L, Rusconi F, Da Fre M, Mello G, Carnielli V, Di Lallo D, et al. Pregnancy disorders leading to very preterm birth influence neonatal outcomes: results of the population-based ACTION cohort study. *Pediatr Res*. 2013 Jun;73(6):794-801.
1188. Gaillard A, Le Strat Y, Mandelbrot L, Keita H, Dubertret C. Predictors of postpartum depression: Prospective study of 264 women followed during pregnancy and postpartum. *Psychiatry Research*. 2014 28 Feb;215(2):341-6.
1189. Gaillard R, Arends LR, Steegers EA, Hofman A, Jaddoe VW. Second- and third-trimester placental hemodynamics and the risks of pregnancy complications: the Generation R Study. *American journal of epidemiology*. 2013 Apr 15;177(8):743-54.
1190. Gaillard R, Arends LR, Steegers EAP, Hofman A, Jaddoe VW. Second-and third-trimester placental hemodynamics and the risks of pregnancy complications. *American journal of epidemiology*. 2013 15 Apr;177(8):743-54.
1191. Gaillard R, Bakker R, Steegers EA, Hofman A, Jaddoe VW. Maternal age during pregnancy is associated with third trimester blood pressure level: the generation R study. *American journal of hypertension*. 2011 Sep;24(9):1046-53.
1192. Gaillard R, Bakker R, Willemsen SP, Hofman A, Steegers EA, Jaddoe VW. Blood pressure tracking during pregnancy and the risk of gestational hypertensive disorders: the Generation R Study. *Eur Heart J*. 2011 Dec;32(24):3088-97.
1193. Gaillard R, Durmus B, Hofman A, Mackenbach JP, Steegers EA, Jaddoe VW. Risk factors and outcomes of maternal obesity and excessive weight gain during pregnancy. *Obesity (Silver Spring, Md)*. 2013 May;21(5):1046-55.
1194. Gaillard R, Eilers PH, Yassine S, Hofman A, Steegers EA, Jaddoe VW. Risk factors and consequences of maternal anaemia and elevated haemoglobin levels during pregnancy: a

- population-based prospective cohort study. *Paediatric and perinatal epidemiology*. 2014 May;28(3):213-26.
1195. Gaillard R, Steegers EA, Hofman A, Jaddoe VW. Associations of maternal obesity with blood pressure and the risks of gestational hypertensive disorders. the Generation R Study. *Journal of Hypertension*. 2011 May;29(5):937-44.
1196. Gaio DS, Schmidt MI, Duncan BB, Nucci LB, Matos MC, Branchtein L. Hypertensive disorders in pregnancy: frequency and associated factors in a cohort of Brazilian women. *Hypertension in pregnancy*. 2001;20(3):269-81.
1197. Galambosi PJ, Kaaja RJ, Stefanovic V, Ulander VM. Safety of low-molecular-weight heparin during pregnancy: a retrospective controlled cohort study. *European journal of obstetrics, gynecology, and reproductive biology*. 2012 Aug;163(2):154-9.
1198. Galdo T, Gonzalez F, Espinoza M, Quintero N, Espinoza O, Herrera S, et al. Impact of pregnancy on the function of transplanted kidneys. *Transplant Proc*. 2005 Apr;37(3):1577-9.
1199. Gallen IW, Jaap A, Roland JM, Chirayath HH. Survey of glargine use in 115 pregnant women with Type 1 diabetes. *Diabetic medicine : a journal of the British Diabetic Association*. 2008 Feb;25(2):165-9.
1200. Gammill HS, Adams Waldorf KM, Aydelotte TM, Lucas J, Leisenring WM, Lambert NC, et al. Pregnancy, microchimerism, and the maternal grandmother. *PloS one*. 2011;6(8):e24101.
1201. Gangaram R, Naicker M, Moodley J. Comparison of pregnancy outcomes in women with hypertensive disorders of pregnancy using 24-hour urinary protein and urinary microalbumin to creatinine ratio. *International journal of gynaecology and obstetrics: the official organ of the International Federation of Gynaecology and Obstetrics*. 2009 Oct;107(1):19-22.
1202. Ganzevoort W, Rep A, Bonsel GJ, De Vries JI, Wolf H. Dynamics and incidence patterns of maternal complications in early-onset hypertension of pregnancy. *Bjog*. 2007 Jun;114(6):741-50.
1203. Ganzevoort W, Rep A, De Vries JI, Bonsel GJ, Wolf H. Relationship between thrombophilic disorders and type of severe early-onset hypertensive disorder of pregnancy. *Hypertension in pregnancy*. 2007;26(4):433-45.
1204. Gao Y, Xue Q, Chen G, Stone P, Zhao M, Chen Q. An analysis of the indications for cesarean section in a teaching hospital in China. *European journal of obstetrics, gynecology, and reproductive biology*. 2013 Oct;170(2):414-8.
1205. Garba M, Nayama M, Alio AP, Holloway ML, Hamisu BS, Salihu HM. Maternal mortality in Niger: a retrospective study in a high risk maternity. *Afr J Med Med Sci*. 2011 Dec;40(4):393-7.
1206. Garcia RG, Celedon J, Sierra-Laguado J, Alarcon MA, Luengas C, Silva F, et al. Raised C-reactive protein and impaired flow-mediated vasodilation precede the development of preeclampsia. *American journal of hypertension*. 2007 Jan;20(1):98-103.
1207. Garcia-Tizon Larroca S, Tayyar A, Poon LC, Wright D, Nicolaidis KH. Competing risks model in screening for preeclampsia by biophysical and biochemical markers at 30-33 weeks' gestation. *Fetal Diagn Ther*. 2014;36(1):9-17.
1208. Gardeil F, Gaffney G, Morrison JJ. Severe HELLP syndrome remote from term. *Irish medical journal*. 2001 Feb;94(2):54.
1209. Gardosi J, Francis A. Adverse pregnancy outcome and association with small for gestational age birthweight by customized and population-based percentiles. *Am J Obstet Gynecol*. 2009 Jul;201(1):28.e1-8.
1210. Gardosi J, Madurasinghe V, Williams M, Malik A, Francis A. Maternal and fetal risk factors for stillbirth: Population based study. *BMJ (Online)*. 2013 02 Feb;346(7893).
1211. Garg AX, Nevis IF, McArthur E, Sontrop JM, Koval JJ, Lam NN, et al. Gestational hypertension and preeclampsia in living kidney donors. *N Engl J Med*. 2015 Jan 8;372(2):124-33.
1212. Garovic VD, Wagner SJ, Turner ST, Rosenthal DW, Watson WJ, Brost BC, et al. Urinary podocyte excretion as a marker for preeclampsia. *Am J Obstet Gynecol*. 2007 Apr;196(4):320.e1-7.

1213. Gastrich MD, Gandhi SK, Pantazopoulos J, Zang EA, Cosgrove NM, Cabrera J, et al. Cardiovascular outcomes after preeclampsia or eclampsia complicated by myocardial infarction or stroke. *Obstet Gynecol.* 2012 Oct;120(4):823-31.
1214. Gat I, Dulitzki M, Schiff E, Sivan E, Simchen MJ. Peripartum thromboprophylaxis for homozygous and heterozygous FVL mutation carriers yields similar pregnancy outcome. *The Israel Medical Association journal : IMAJ.* 2014 Feb;16(2):96-100.
1215. Gaugler-Senden IP, Huijssoon AG, Visser W, Steegers EA, de Groot CJ. Maternal and perinatal outcome of preeclampsia with an onset before 24 weeks' gestation. Audit in a tertiary referral center. *European journal of obstetrics, gynecology, and reproductive biology.* 2006 Sep-Oct;128(1-2):216-21.
1216. Gaugler-Senden IP, Tamsma JT, van der Bent C, Kusters R, Steegers EA, de Groot CJ. Angiogenic factors in women ten years after severe very early onset preeclampsia. *PloS one.* 2012;7(8):e43637.
1217. Gavard JA, Artal R. Gestational weight gain and maternal and neonatal outcomes in term twin pregnancies in obese women. *Twin Research and Human Genetics.* 2014;17(2):127-33.
1218. Gawande S, Vaidya M, Tadke R, Kirpekar V, Bhave S. Progressive muscle relaxation in hyperemesis gravidarum. *Journal of SAFOG.* 2011 January-April;3(1):28-32.
1219. Geake J, Dabscheck E, Reid D. Hemolysis, elevated liver enzymes, and low platelet (HELLP) syndrome in a 26-year-old woman with cystic fibrosis: A case report. *Journal of Medical Case Reports.* 2012;6(134).
1220. Gebhardt S, Bruiners N, Hillermann R. A novel exonic variant (221delT) in the LGALS13 gene encoding placental protein 13 (PP13) is associated with preterm labour in a low risk population. *J Reprod Immunol.* 2009 Nov;82(2):166-73.
1221. Gedikbasi A, Ulker V, Aydin O, Akyol A, Numanoglu C, Ceylan Y. Brenner tumor in pregnancy: Clinical approach and pathological findings. *Journal of Obstetrics and Gynaecology Research.* 2009 June;35(3):565-8.
1222. Geelhoed DW, Visser LE, Asare K, Schagen van Leeuwen JH, van Roosmalen J. Trends in maternal mortality: a 13-year hospital-based study in rural Ghana. *European journal of obstetrics, gynecology, and reproductive biology.* 2003 Apr 25;107(2):135-9.
1223. Geelhoed JJ, Fraser A, Tilling K, Benfield L, Davey Smith G, Sattar N, et al. Preeclampsia and gestational hypertension are associated with childhood blood pressure independently of family adiposity measures: the Avon Longitudinal Study of Parents and Children. *Circulation.* 2010 Sep 21;122(12):1192-9.
1224. Geenes V, Chappell LC, Seed PT, Steer PJ, Knight M, Williamson C. Association of severe intrahepatic cholestasis of pregnancy with adverse pregnancy outcomes: A prospective population-based case-control study. *Hepatology.* 2014 April;59(4):1482-91.
1225. Geidam AD, Audu BM, Kawuwa BM, Obed JY. Rising trend and indications of caesarean section at the university of Maiduguri teaching hospital, Nigeria. *Ann Afr Med.* 2009 Apr-Jun;8(2):127-32.
1226. Geifman-Holtzman O, Xiong Y, Holtzman EJ, Hoffman B, Gaughan J, Liebermann DA. Increased placental telomerase mRNA in hypertensive disorders of pregnancy. *Hypertension in pregnancy.* 2010;29(4):434-45.
1227. Geipel A, Ludwig M, Germer U, Katalinic A, Diedrich K, Gembruch U. Uterine artery Doppler velocimetry and the outcome of pregnancies resulting from ICSI. *Human reproduction.* 2001 Jul;16(7):1397-402.
1228. Geist RR, Beyth Y, Shashar D, Beller U, Samueloff A. Perinatal Outcome of Teenage Pregnancies in a Selected Group of Patients. *Journal of Pediatric and Adolescent Gynecology.* 2006 June;19(3):189-93.
1229. Genc H, Uzun H, Benian A, Simsek G, Gelisgen R, Madazli R, et al. Evaluation of oxidative stress markers in first trimester for assessment of preeclampsia risk. *Arch Gynecol Obstet.* 2011 Dec;284(6):1367-73.



1230. Geocadin RG, Razumovsky AY, Wityk RJ, Bhardwaj A, Ulatowski JA. Intracerebral hemorrhage and postpartum cerebral vasculopathy. *J Neurol Sci.* 2002 Dec 15;205(1):29-34.
1231. George I, Mekahli D, Rayyan M, Levchenko E, Allegaert K. Postnatal trends in creatinemia and its covariates in extremely low birth weight (ELBW) neonates. *Pediatr Nephrol.* 2011 Oct;26(10):1843-9.
1232. George IO, Jeremiah I. Perinatal outcome of babies delivered to eclamptic mothers: A prospective study from a Nigerian Tertiary Hospital. *International Journal of Biomedical Science.* 2009 15 Dec;5(4):390-4.
1233. Gerhardt MA, Gunka VB, Miller RJ. Hemodynamic stability during labor and delivery with continuous epidural infusion. *The Journal of the American Osteopathic Association.* 2006 Dec;106(12):692-8.
1234. Gerlei Z, Wettstein D, Rigo J, Asztalos L, Langer RM. Childbirth after organ transplantation in Hungary. *Transplant Proc.* 2011 May;43(4):1223-4.
1235. Gershovitz M, Sergienko R, Friedler JM, Wiznitzer A, Zlotnik A, Sheiner E. Pregnancy outcome in women following splenectomy. *Journal of Women's Health.* 2011 01 Aug;20(8):1233-7.
1236. Gessesew A. Twin deliveries in a zonal hospital: ten years retrospective study. *Ethiopian medical journal.* 2007 Jan;45(1):55-9.
1237. Gessesew A. Maternal complications--in a zonal hospital. *Ethiopian medical journal.* 2007 Jan;45(1):47-54.
1238. Getahun D, Ananth CV, Oyelese Y, Chavez MR, Kirby RS, Smulian JC. Primary preeclampsia in the second pregnancy: effects of changes in prepregnancy body mass index between pregnancies. *Obstet Gynecol.* 2007 Dec;110(6):1319-25.
1239. Getahun D, Rhoads GG, Demissie K, Lu SE, Quinn VP, Fassett MJ, et al. In utero exposure to ischemic-hypoxic conditions and attention-deficit/hyperactivity disorder. *Pediatrics.* 2013 Jan;131(1):e53-61.
1240. Ghaemi SZ, Forouhari S, Dabbaghmanesh MH, Sayadi M, Bakhshayeshkaram M, Vaziri F, et al. A prospective study of selenium concentration and risk of preeclampsia in pregnant Iranian women: a nested case-control study. *Biol Trace Elem Res.* 2013 May;152(2):174-9.
1241. Ghafari A, Sanadgol H. Pregnancy after renal transplantation: ten-year single-center experience. *Transplant Proc.* 2008 Jan-Feb;40(1):251-2.
1242. Ghazal-Aswad S, Badrinath P, Sidky I, Safi TH, Gargash H, Abdul-Razak Y, et al. Severe acute maternal morbidity in a high-income developing multiethnic country. *Matern Child Health J.* 2013 Apr;17(3):399-404.
1243. Ghidini A. Overview of low molecular weight heparin for preventative treatment of adverse obstetric outcomes related to abnormal placentation. *Prenatal diagnosis.* 2014 Jul;34(7):649-54.
1244. Ghike S, Jain S, Kumare B, Gupta M, Shembekar C. A study of serum homocysteine levels during normal pregnancy and pre-eclampsia. *Journal of SAFOG.* 2011 May-August;3(2):71-4.
1245. Ghosh G, Grewal J, Mannisto T, Mendola P, Chen Z, Xie Y, et al. Racial/ethnic differences in pregnancy-related hypertensive disease in nulliparous women. *Ethnicity & disease.* 2014 Summer;24(3):283-9.
1246. Ghosh SK, Raheja S, Tuli A, Raghunandan C, Agarwal S. Combination of uterine artery Doppler velocimetry and maternal serum placental growth factor estimation in predicting occurrence of pre-eclampsia in early second trimester pregnancy: a prospective cohort study. *European journal of obstetrics, gynecology, and reproductive biology.* 2012 Apr;161(2):144-51.
1247. Ghosh SK, Raheja S, Tuli A, Raghunandan C, Agarwal S. Can maternal serum placental growth factor estimation in early second trimester predict the occurrence of early onset preeclampsia and/or early onset intrauterine growth restriction? A prospective cohort study. *The journal of obstetrics and gynaecology research.* 2013 May;39(5):881-90.
1248. Ghosh SK, Raheja S, Tuli A, Raghunandan C, Agarwal S. Serum placental growth factor as a

- predictor of early onset preeclampsia in overweight/obese pregnant women. *Journal of the American Society of Hypertension : JASH*. 2013 Mar-Apr;7(2):137-48.
1249. Ghosh SK, Raheja S, Tuli A, Raghunandan C, Agarwal S. Is serum placental growth factor more effective as a biomarker in predicting early onset preeclampsia in early second trimester than in first trimester of pregnancy? *Arch Gynecol Obstet*. 2013 May;287(5):865-73.
1250. Ghossein-Doha C, Peeters L, Van Heijster S, Van Kuijk S, Spaan J, Delhaas T, et al. Hypertension after preeclampsia is preceded by changes in cardiac structure and function. *Hypertension*. 2013 August;62(2):382-90.
1251. Ghossein-Doha C, Spaanderman M, Van Kuijk SMJ, Kroon AA, Delhaas T, Peeters L. Long-term risk to develop hypertension in women with former preeclampsia: A longitudinal pilot study. *Reproductive Sciences*. 2014 July;21(7):846-53.
1252. Giamarellos-Bourboulis EJ, van de Veerdonk FL, Mouktaroudi M, Raftogiannis M, Antonopoulou A, Joosten LA, et al. Inhibition of caspase-1 activation in Gram-negative sepsis and experimental endotoxemia. *Critical care (London, England)*. 2011;15(1):R27.
1253. Gibson-Helm M, Teede H, Block A, Knight M, East C, Wallace EM, et al. Maternal health and pregnancy outcomes among women of refugee background from African countries: A retrospective, observational study in Australia. *BMC pregnancy and childbirth*. 2014 November 27;14(1).
1254. Gietka-Czernel M, Debska M, Kretowicz P, Zgliczynski W, Oltarzewski M. Hyperthyroidism during pregnancy - The role of measuring maternal TSH receptor antibodies and foetal ultrasound monitoring. *Endokrynologia Polska*. 2014;65(4):259-68.
1255. Gilbert WM, Young AL, Danielsen B. Pregnancy outcomes in women with chronic hypertension: a population-based study. *The Journal of reproductive medicine*. 2007 Nov;52(11):1046-51.
1256. Gill SK, Maltepe C, Koren G. The effect of heartburn and acid reflux on the severity of nausea and vomiting of pregnancy. *Canadian Journal of Gastroenterology*. 2009;23(4):270-2.
1257. Giral M, Foucher Y, Dufay A, Van Huyen JPD, Renaudin K, Moreau A, et al. Pretransplant sensitization against angiotensin II type 1 receptor is a risk factor for acute rejection and graft loss. *American Journal of Transplantation*. 2013 October;13(10):2567-76.
1258. Gishti O, Jaddoe VW, Felix JF, Reiss I, Hofman A, Ikram MK, et al. Influence of maternal angiogenic factors during pregnancy on microvascular structure in school-age children. *Hypertension*. 2015 Apr;65(4):722-8.
1259. Gita G, Bharti S, Shashi K, Arvind K. Trends in maternal mortality and impact of janani suraksha yojana (JSY) on maternal mortality ratio in a tertiary referral hospital. *Journal of Obstetrics and Gynecology of India*. 2012 June;62(3):307-11.
1260. Giugliano E, Cagnazzo E, Milillo V, Moscarini M, Vesce F, Caserta D, et al. The risk factors for failure of labor induction: A cohort study. *Journal of Obstetrics and Gynecology of India*. 2014 April;64(2):111-5.
1261. Gkogkos P, Androutopoulos G, Vassilakos P, Panayiotakis G, Kourounis G, Decavalas G. Mid-trimester maternal serum AFP levels in predicting adverse pregnancy outcome. *Clinical and Experimental Obstetrics and Gynecology*. 2008;35(3):208-10.
1262. Gleicher N. Maternal autoimmunity and adverse pregnancy outcomes. *J Autoimmun*. 2014 May;50:83-6.
1263. Glueck CJ, Bornovali S, Pranikoff J, Goldenberg N, Dharashivkar S, Wang P. Metformin, pre-eclampsia, and pregnancy outcomes in women with polycystic ovary syndrome. *Diabetic medicine : a journal of the British Diabetic Association*. 2004 Aug;21(8):829-36.
1264. Glueck CJ, Goldenberg N, Pranikoff J, Khan Z, Padda J, Wang P. Effects of metformin-diet intervention before and throughout pregnancy on obstetric and neonatal outcomes in patients with polycystic ovary syndrome. *Current medical research and opinion*. 2013 Jan;29(1):55-62.
1265. Glueck CJ, Phillips H, Cameron D, Wang P, Fontaine RN, Moore SK, et al. The 4G/4G

polymorphism of the hypofibrinolytic plasminogen activator inhibitor type 1 gene: an independent risk factor for serious pregnancy complications. *Metabolism*. 2000 Jul;49(7):845-52.

1266. Glueck CJ, Wang P, Goldenberg N, Sieve L. Pregnancy loss, polycystic ovary syndrome, thrombophilia, hypofibrinolysis, enoxaparin, metformin. *Clinical and applied thrombosis/hemostasis : official journal of the International Academy of Clinical and Applied Thrombosis/Hemostasis*. 2004 Oct;10(4):323-34.

1267. Gocmen R, Ozgen B, Oguz KK. Widening the spectrum of PRES: Series from a tertiary care center. *European Journal of Radiology*. 2007 June;62(3):454-9.

1268. Godara SM, Kute VB, Trivedi HL, Vanikar AV, Shah PR, Gumber MR, et al. Clinical profile and outcome of acute kidney injury related to pregnancy in developing countries: a single-center study from India. *Saudi J Kidney Dis Transpl*. 2014 Jul;25(4):906-11.

1269. Godinho AB, Cardoso E, Melo MA, Goncalves M, Da Graca LM. Ultrasonographic diagnosis of fetal ovarian cysts: five cases in five years. *The journal of maternal-fetal & neonatal medicine : the official journal of the European Association of Perinatal Medicine, the Federation of Asia and Oceania Perinatal Societies, the International Society of Perinatal Obstet*. 2008 Dec;21(12):875-9.

1270. Goetzinger K, Cahill A, MacOnes G, Odibo A. The relationship between maternal body mass index and tobacco use on small-for-gestational-age infants. *American Journal of Perinatology*. 2012;29(3):153-8.

1271. Goetzinger KR, Cahill AG, Macones GA, Odibo AO. Isolated short femur length on second-trimester sonography: a marker for fetal growth restriction and other adverse perinatal outcomes. *J Ultrasound Med*. 2012 Dec;31(12):1935-41.

1272. Goetzinger KR, Singla A, Gerkowicz S, Dicke JM, Gray DL, Odibo AO. Predicting the risk of pre-eclampsia between 11 and 13 weeks' gestation by combining maternal characteristics and serum analytes, PAPP-A and free beta-hCG. *Prenatal diagnosis*. 2010 Dec;30(12-13):1138-42.

1273. Goetzinger KR, Zhong Y, Cahill AG, Odibo L, Macones GA, Odibo AO. Efficiency of first-trimester uterine artery Doppler, a-disintegrin and metalloprotease 12, pregnancy-associated plasma protein a, and maternal characteristics in the prediction of preeclampsia. *Journal of ultrasound in medicine : official journal of the American Institute of Ultrasound in Medicine*. 2013 01 Sep;32(9):1593-600.

1274. Gofton EN, Capewell V, Natale R, Gratton RJ. Obstetrical intervention rates and maternal and neonatal outcomes of women with gestational hypertension. *Am J Obstet Gynecol*. 2001 Oct;185(4):798-803.

1275. Gokcel A, Bagis T, Kilicadag EB, Tarim E, Guvener N. Comparison of the criteria for gestational diabetes mellitus by NDDG and Carpenter and Coustan, and the outcomes of pregnancy. *J Endocrinol Invest*. 2002 Apr;25(4):357-61.

1276. Gold KJ, Demonner SM, Lantz PM, Hayward RA. Prematurity and low birth weight as potential mediators of higher stillbirth risk in mixed black/white race couples. *Journal of Women's Health*. 2010 01 Apr;19(4):767-73.

1277. Gomaa MF, Naguib AH, Swedan KH, Abdellatif SS. Serum tumor necrosis factor-alpha level and uterine artery Doppler indices at 11-13 weeks' gestation for preeclampsia screening in low-risk pregnancies: A prospective observational study. *Journal of Reproductive Immunology*. 2015 01 Jun;109:31-5.

1278. Gombar S, Ahuja V, Jafra A. A retrospective analysis of obstetric patient's outcome in intensive care unit of a tertiary care center. *Journal of Anaesthesiology Clinical Pharmacology*. 2014 01 Oct;30(4):502-7.

1279. Gomez O, Figueras F, Martinez JM, Del Rio M, Palacio M, Eixarch E, et al. Sequential changes in uterine artery blood flow pattern between the first and second trimesters of gestation in relation to pregnancy outcome. *Ultrasound in Obstetrics and Gynecology*. 2006 November;28(6):802-8.

1280. Gomez O, Martinez JM, Figueras F, Del Rio M, Borobio V, Puerto B, et al. Uterine artery Doppler

at 11-14 weeks of gestation to screen for hypertensive disorders and associated complications in an unselected population. *Ultrasound Obstet Gynecol.* 2005 Oct;26(5):490-4.

1281. Gonen R, Shahar R, Grimpel YI, Chefetz I, Sammar M, Meiri H, et al. Placental protein 13 as an early marker for pre-eclampsia: a prospective longitudinal study. *Bjog.* 2008 Nov;115(12):1465-72.

1282. Gong J, Savitz DA, Stein CR, Engel SM. Maternal ethnicity and pre-eclampsia in New York City, 1995-2003. *Paediatric and perinatal epidemiology.* 2012 Jan;26(1):45-52.

1283. Gonzales GF, Tapia V, Gasco M, Carrillo CE, Fort AL. Association of hemoglobin values at booking with adverse maternal outcomes among Peruvian populations living at different altitudes. *International journal of gynaecology and obstetrics: the official organ of the International Federation of Gynaecology and Obstetrics.* 2012 May;117(2):134-9.

1284. Gonzalez Gonzalez NL, Gonzalez Davila E, Goya M, Vega B, Hernandez Suarez M, Bartha JL. Twin pregnancy among women with pregestational type 1 or type 2 diabetes mellitus. *International Journal of Gynecology and Obstetrics.* 2014 July;126(1):83-7.

1285. Gonzalez NLG, Goya M, Bellart J, Lopez J, Sancho MA, Mozas J, et al. Obstetric and perinatal outcome in women with twin pregnancy and gestational diabetes. *Journal of Maternal-Fetal and Neonatal Medicine.* 2012 July;25(7):1084-9.

1286. Goodarzi Khoigani M, Paknahad Z, Mardanian F. The relationship between nutrients intake and preeclampsia in pregnant women. *Journal of Research in Medical Sciences.* 2012;17(SUPPL.2):S210-S7.

1287. Goonewardene IM, Deeyagaha Waduge RP. Adverse effects of teenage pregnancy. *Ceylon Med J.* 2005 Sep;50(3):116-20.

1288. Gordin D, Hiilesmaa V, Fagerudd J, Ronnback M, Forsblom C, Kaaja R, et al. Pre-eclampsia but not pregnancy-induced hypertension is a risk factor for diabetic nephropathy in type 1 diabetic women. *Diabetologia.* 2007 March;50(3):516-22.

1289. Gordin D, Kaaja R, Forsblom C, Hiilesmaa V, Teramo K, Groop PH. Pre-eclampsia and pregnancy-induced hypertension are associated with severe diabetic retinopathy in type 1 diabetes later in life. *Acta Diabetol.* 2013 Oct;50(5):781-7.

1290. Gordon A, Raynes-Greenow C, McGeechan K, Morris J, Jeffery H. Stillbirth risk in a second pregnancy. *Obstet Gynecol.* 2012 Mar;119(3):509-17.

1291. Gordon CT, Jimenez-Fernandez S, Daniels LB, Kahn AM, Tarsa M, Matsubara T, et al. Pregnancy in women with a history of Kawasaki disease: management and outcomes. *Bjog.* 2014 Oct;121(11):1431-8.

1292. Gorman MC, Orme KS, Nguyen NT, Kent EJ, 3rd, Caughey AB. Outcomes in pregnancies complicated by methamphetamine use. *Am J Obstet Gynecol.* 2014 Oct;211(4):429.e1-7.

1293. Goswami BK, Biswas SC, Goswami S, Basu P, Mallick J. Genito-urinary fistula - A review on 45 cases. *Journal International Medical Sciences Academy.* 2006 April/June;19(2):81-3.

1294. Goswamia D, Tannetta DS, Magee LA, Fuchisawa A, Redman CWG, Sargent IL, et al. Excess syncytiotrophoblast microparticle shedding is a feature of early-onset pre-eclampsia, but not normotensive intrauterine growth restriction. *Placenta.* 2006 January;27(1):56-61.

1295. Goulis DG, Chappell L, Gibbs RG, Williams D, Dave JR, Taylor P, et al. Association of raised titres of antibodies to *Chlamydia pneumoniae* with a history of pre-eclampsia. *Bjog.* 2005 Mar;112(3):299-305.

1296. Goynumer G, Ozdemir A, Wetherilt L, Durukan B, Yayla M. Umbilical cord thickness in the first and early second trimesters and perinatal outcome. *J Perinat Med.* 2008;36(6):523-6.

1297. Grab D, Paulus WE, Erdmann M, Terinde R, Oberhoffer R, Lang D, et al. Effects of low-dose aspirin on uterine and fetal blood flow during pregnancy: results of a randomized, placebo-controlled, double-blind trial. *Ultrasound Obstet Gynecol.* 2000 Jan;15(1):19-27.

1298. Grace T, Bulsara M, Pennell C, Hands B. Maternal hypertensive diseases negatively affect offspring motor development. *Pregnancy Hypertension.* 2014 July;4(3):209-14.

1299. Gramellini D, Piantelli G, Verrotti C, Fieni S, Chiaie LD, Kaihura C. Doppler velocimetry and non

stress test in severe fetal growth restriction. *Clinical and experimental obstetrics & gynecology*. 2001;28(1):33-9.

1300. Grandone E, Colaizzo D, Martinelli P, Pavone G, Errico M, Vecchione G, et al. Does endothelial nitric oxide synthase gene variation play a role in the occurrence of hypertension in pregnancy? *Hypertension in pregnancy*. 2003;22(2):149-55.

1301. Grandone E, Colaizzo D, Tiscia G, Vergura P, Cappucci F, Greco L, et al. Impact of common thrombophilias and JAK2 V617F on pregnancy outcomes in unselected Italian women. *Journal of Thrombosis and Haemostasis*. 2011 March;9(3):496-501.

1302. Grandone E, Margaglione M, Colaizzo D, Pavone G, Paladini D, Martinelli P, et al. Lower birth-weight in neonates of mothers carrying factor V G1691A and factor II A(20210) mutations. *Haematologica*. 2002 Feb;87(2):177-81.

1303. Greenberg MB, Penn AA, Thomas LJ, El-Sayed YY, Caughey AB, Lyell DJ. Neonatal medical admission in a term and late-preterm cohort exposed to magnesium sulfate. *Am J Obstet Gynecol*. 2011 Jun;204(6):515.e1-7.

1304. Greenwood C, Yudkin P, Sellers S, Impey L, Doyle P. Why is there a modifying effect of gestational age on risk factors for cerebral palsy? *Archives of Disease in Childhood: Fetal and Neonatal Edition*. 2005 March;90(2):F141-F6.

1305. Greer LG, Sheffield JS, Rogers VL, Roberts SW, McIntire DD, Wendel GD. Maternal and neonatal outcomes after antepartum treatment of influenza with antiviral medications. *Obstetrics and Gynecology*. 2010 April;115(4):711-6.

1306. Grether JK, Hoogstrate J, Walsh-Greene E, Nelson KB. Magnesium sulfate for tocolysis and risk of spastic cerebral palsy in premature children born to women without preeclampsia. *Am J Obstet Gynecol*. 2000 Sep;183(3):717-25.

1307. Grether JK, Nelson KB, Walsh E, Willoughby RE, Redline RW. Intrauterine exposure to infection and risk of cerebral palsy in very preterm infants. *Archives of pediatrics & adolescent medicine*. 2003 Jan;157(1):26-32.

1308. Griffin D, Brown L, Feinn R, Jacob MC, Scranton V, Egan J, et al. Impact of an educational intervention and insurance coverage on patients' preferences to transfer multiple embryos. *Reproductive BioMedicine Online*. 2012 August;25(2):204-8.

1309. Griffin ME, Coffey M, Johnson H, Scanlon P, Foley M, Stronge J, et al. Universal vs. risk factor-based screening for gestational diabetes mellitus: detection rates, gestation at diagnosis and outcome. *Diabetic medicine : a journal of the British Diabetic Association*. 2000 Jan;17(1):26-32.

1310. Griffith MI, Mann JR, McDermott S. The risk of intellectual disability in children born to mothers with preeclampsia or eclampsia with partial mediation by low birth weight. *Hypertension in pregnancy*. 2011 February;30(1):108-15.

1311. Gris JC, Chauleur C, Faillie JL, Baer G, Mares P, Fabbro-Peray P, et al. Enoxaparin for the secondary prevention of placental vascular complications in women with abruptio placentae: The pilot randomised controlled NOH-AP trial. *Thrombosis and Haemostasis*. 2010 October;104(4):771-9.

1312. Gris JC, Chauleur C, Molinari N, Mares P, Fabbro-Peray P, Quere I, et al. Addition of enoxaparin to aspirin for the secondary prevention of placental vascular complications in women with severe pre-eclampsia: The pilot randomised controlled NOH-PE trial. *Thrombosis and Haemostasis*. 2011;106(6):1053-61.

1313. Grisaru-Granovsky S, Halevy T, Eidelman A, Elstein D, Samueloff A. Hypertensive disorders of pregnancy and the small for gestational age neonate: not a simple relationship. *Am J Obstet Gynecol*. 2007 Apr;196(4):335.e1-5.

1314. Grisaru-Granovsky S, Tevet A, Bar-Shavit R, Salah Z, Elstein D, Samueloff A, et al. Association study of protease activated receptor 1 gene polymorphisms and adverse pregnancy outcomes: results of a pilot study in Israel. *American journal of medical genetics Part A*. 2007 Nov 1;143a(21):2557-63.

1315. Grobman WA, Auger M, Shulman LP, Elias S. The association between chorionic villus sampling and preeclampsia. *Prenatal diagnosis*. 2009 Aug;29(8):800-3.
1316. Groeneveld E, Lambers MJ, Lambalk CB, Broeze KA, Haapsamo M, De Sutter P, et al. Preconceptional low-dose aspirin for the prevention of hypertensive pregnancy complications and preterm delivery after IVF: A meta-analysis with individual patient data. *Human reproduction*. 2013 June;28(6):1480-8.
1317. Groom KM, North RA, Poppe KK, Sadler L, McCowan LM. The association between customised small for gestational age infants and pre-eclampsia or gestational hypertension varies with gestation at delivery. *Bjog*. 2007 Apr;114(4):478-84.
1318. Groothuis JT, Van Kuppevelt DH. Postpartum spinal cord injury in a woman with HELLP syndrome. *Journal of Spinal Cord Medicine*. 2008;31(3):309-11.
1319. Grotegut CA, Tatineni H, Dandolu V, Whiteman VE, Katari S, Geifman-Holtzman O. Obstetric outcomes with a false-positive one-hour glucose challenge test by the Carpenter-Coustan criteria. *The journal of maternal-fetal & neonatal medicine : the official journal of the European Association of Perinatal Medicine, the Federation of Asia and Oceania Perinatal Societies, the International Society of Perinatal Obstet*. 2008 May;21(5):315-20.
1320. Groten T, Schleussner E, Lehmann T, Reister F, Holzer B, Danso KA, et al. eNOS14 and EPHX1 polymorphisms affect maternal susceptibility to preeclampsia: analysis of five polymorphisms predisposing to cardiovascular disease in 279 Caucasian and 241 African women. *Arch Gynecol Obstet*. 2014 Mar;289(3):581-93.
1321. Guballa N, Sammaritano L, Schwartzman S, Buyon J, Lockshin MD. Ovulation induction and in vitro fertilization in systemic lupus erythematosus and antiphospholipid syndrome. *Arthritis Rheum*. 2000 Mar;43(3):550-6.
1322. Gudnasson HM, Dubiel M, Gudmundsson S. Preeclampsia--abnormal uterine artery Doppler is related to recurrence of symptoms during the next pregnancy. *J Perinat Med*. 2004;32(5):400-3.
1323. Guerrier G, Oluyide B, Keramarou M, Grais R. High maternal and neonatal mortality rates in northern Nigeria: An 8-month observational study. *International Journal of Women's Health*. 2013 12 Aug;5(1):495-9.
1324. Guerrier G, Oluyide B, Keramarou M, Grais RF. Factors associated with severe preeclampsia and eclampsia in Jahun, Nigeria. *International Journal of Women's Health*. 2013 19 Aug;5(1):509-13.
1325. Gui J, Li A, Su X, Feng L. Association between hyperglycemia in middle and late pregnancy and maternal-fetal outcomes: A retrospective study. *BMC pregnancy and childbirth*. 2014 20 Jan;14(1).
1326. Guillaume A, Sananes N, Akladios CY, Boudier E, Diemunsch P, Averous G, et al. Amniotic fluid embolism: 10-year retrospective study in a level III maternity hospital. *European Journal of Obstetrics Gynecology and Reproductive Biology*. 2013 July;169(2):189-92.
1327. Guilleminault C, Palombini L, Poyares D, Takaoka S, Huynh NTL, El-Sayed Y. Pre-eclampsia and nasal CPAP: Part 1. Early intervention with nasal CPAP in pregnant women with risk-factors for pre-eclampsia: Preliminary findings. *Sleep Medicine*. 2007 December;9(1):9-14.
1328. Guillen MA, Herranz L, Barquiel B, Hillman N, Burgos MA, Pallardo LF. Influence of gestational diabetes mellitus on neonatal weight outcome in twin pregnancies. *Diabetic Medicine*. 2014 01 Dec;31(12):1651-6.
1329. Guirl MJ, Weinstein JS, Goldstein RM, Levy MF, Klintmalm GB. Two-stage total hepatectomy and liver transplantation for acute deterioration of chronic liver disease: a new bridge to transplantation. *Liver transplantation : official publication of the American Association for the Study of Liver Diseases and the International Liver Transplantation Society*. 2004 Apr;10(4):564-70.
1330. Gul A, Cebeci A, Aslan H, Polat I, Ozdemir A, Ceylan Y. Perinatal outcomes in severe preeclampsia-eclampsia with and without HELLP syndrome. *Gynecol Obstet Invest*. 2005;59(2):113-8.
1331. Gul O, Ozturk E, Ugur MG, Cebesoy FB, Kurtul N, Pence S, et al. Serum total sialic acid levels and

sialic acid acetyl esterase gene variation in patients with preeclampsia

Preeklampik gebelerde serum total sialik asit seviyeleri ve sialik asit esteraz gen varyasyonu. *Turk Jinekoloji ve Obstetrik Dernegi Dergisi*. 2012;9(2):99-105.

1332. Gungor ES, Danisman N, Mollamahmutoglu L. Relationship between serum uric acid, creatinine, albumin and gestational diabetes mellitus. *Clin Chem Lab Med*. 2006;44(8):974-7.

1333. Gunnarsdottir J, Stephansson O, Cnattingius S, Akerud H, Wikstrom AK. Risk of placental dysfunction disorders after prior miscarriages: a population-based study. *Am J Obstet Gynecol*. 2014 Jul;211(1):34.e1-8.

1334. Gupta A, Ferguson J, Rahman M, Weber-Shrikant E, Venuto R. Acute oliguric renal failure in HELLP syndrome: case report and review of literature. *Ren Fail*. 2012;34(5):653-6.

1335. Gupta A, Kaliaperumal S, Setia S, Suchi ST, Rao VA. Retinopathy in preeclampsia: association with birth weight and uric acid level. *Retina (Philadelphia, Pa)*. 2008 Oct;28(8):1104-10.

1336. Gupta A, Mathai SS, Kanitkar M. Incidence of thrombocytopenia in the neonatal intensive care unit. *Medical Journal Armed Forces India*. 2011 July;67(3):234-6.

1337. Gupta P, Faridi MMA, Goel N, Zaidi Z. Reappraisal of twinning: Epidemiology and outcome in the early neonatal period. *Singapore Medical Journal*. 2014 June;55(6):310-7.

1338. Gupta R, Nigam S, Arora P, Khurana N, Batra S, Mandal AK. Clinico-pathological profile of 12 cases of chorangiosis. *Arch Gynecol Obstet*. 2006 Apr;274(1):50-3.

1339. Guroi-Urganci I, Cromwell DA, Mahmood TA, van der Meulen JH, Templeton A. A population-based cohort study of the effect of Caesarean section on subsequent fertility. *Human reproduction*. 2014 Jun;29(6):1320-6.

1340. Gurrieri C, Garovic VD, Gullo A, Bojanic K, Sprung J, Narr BJ, et al. Kidney injury during pregnancy: associated comorbid conditions and outcomes. *Arch Gynecol Obstet*. 2012 Sep;286(3):567-73.

1341. Gutierrez Junquera C, Balmaseda E, Gil E, Martinez A, Sorli M, Cuartero I, et al. Acute fatty liver of pregnancy and neonatal long-chain 3-hydroxyacyl-coenzyme A dehydrogenase (LCHAD) deficiency. *European Journal of Pediatrics*. 2009 January;168(1):103-6.

1342. Gutierrez MJ, Gonzalez P, Delgado I, Gutierrez E, Gonzalez E, Siqueira RC, et al. Renal allograft function and cardiovascular risk in recipients of kidney transplantation after successful pregnancy. *Transplant Proc*. 2009 Jul-Aug;41(6):2399-402.

1343. Guven MA, Ertas IE, Coskun A, Ciragil P. Serologic and stool antigen assay of *Helicobacter pylori* infection in hyperemesis gravidarum: Which test is useful during early pregnancy? *Taiwanese Journal of Obstetrics and Gynecology*. 2011 March;50(1):37-41.

1344. Guven S, Sonmez M, Karahan SC. The role of fibrinolytic and antifibrinolytic activities in the pathophysiology of HELLP syndrome. *Hypertension in pregnancy*. 2011;30(3):275-86.

1345. Guzel AI, Kuyumcuoglu U, Celik Y. Are maternal and fetal parameters related to perinatal mortality in HELLP syndrome? *Arch Gynecol Obstet*. 2011 Jun;283(6):1227-32.

1346. Gyamfi-Bannerman C, Fuchs KM, Young OM, Hoffman MK. Nonspontaneous late preterm birth: etiology and outcomes. *Am J Obstet Gynecol*. 2011 Nov;205(5):456.e1-6.

1347. Gybel-Brask D, Hogdall E, Johansen J, Christensen IJ, Skibsted L. Serum YKL-40 and uterine artery Doppler -- a prospective cohort study, with focus on preeclampsia and small-for-gestational-age. *Acta Obstet Gynecol Scand*. 2014 Aug;93(8):817-24.

1348. Ha JE, Jun JK, Ko HJ, Paik DI, Bae KH. Association between periodontitis and preeclampsia in never-smokers: a prospective study. *J Clin Periodontol*. 2014 Sep;41(9):869-74.

1349. Haas DM, Parker CB, Wing DA, Parry S, Grobman WA, Mercer BM, et al. A description of the methods of the Nulliparous Pregnancy Outcomes Study: monitoring mothers-to-be (nuMoM2b). *Am J Obstet Gynecol*. 2015 Apr;212(4):539.e1-e24.

1350. Haas DM, Rivera-Alsina ME, McNamara MF. Maternal mortality in the U.S. Department of

- Defense, 1993-1998. *The Journal of reproductive medicine*. 2005 Dec;50(12):951-3.
1351. Haavaldsen C, Tanbo T, Eskild A. Placental weight in singleton pregnancies with and without assisted reproductive technology: A population study of 536 567 pregnancies. *Human reproduction*. 2012 February;27(2):576-82.
1352. Habas E, Rayani A, Ganterie R. Thrombocytopenia in hypertensive disease of pregnancy. *Journal of Obstetrics and Gynecology of India*. 2013 April;63(2):96-100.
1353. Haberman S, Bracero LA, Byrne DW. Spectral Doppler index mapping of the umbilicoplacental circulation and pregnancy outcome. *Gynecol Obstet Invest*. 2004;58(1):1-7.
1354. Habli M, Eftekhari N, Wiebracht E, Bombrys A, Khabbaz M, How H, et al. Long-term maternal and subsequent pregnancy outcomes 5 years after hemolysis, elevated liver enzymes, and low platelets (HELLP) syndrome. *American Journal of Obstetrics and Gynecology*. 2009 October;201(4):385.e1-.e5.
1355. Hack KE, Derks JB, de Visser VL, Elias SG, Visser GH. The natural course of monochorionic and dichorionic twin pregnancies: a historical cohort. *Twin Res Hum Genet*. 2006 Jun;9(3):450-5.
1356. Hack M, Schluchter M, Margevicius S, Andreias L, Taylor HG, Cuttler L. Trajectory and correlates of growth of extremely-low-birth-weight adolescents. *Pediatric Research*. 2014 February;75(2):358-66.
1357. Hackley B, Fennie K, Applebaum J, Berry D, D'Eramo Melkus G. The effect of language preference on prenatal weight gain and postpartum weight retention in urban Hispanic women. *Ethnicity & disease*. 2010 Spring;20(2):162-8.
1358. Haddad B, Deis S, Goffinet F, Paniel BJ, Cabrol D, Siba BM. Maternal and perinatal outcomes during expectant management of 239 severe preeclamptic women between 24 and 33 weeks' gestation. *Am J Obstet Gynecol*. 2004 Jun;190(6):1590-5; discussion 5-7.
1359. Haddow JE, Craig WY, Neveux LM, Haddow HR, Palomaki GE, Lambert-Messerlian G, et al. Implications of High Free Thyroxine (FT4) concentrations in euthyroid pregnancies: the FaSTER trial. *The Journal of clinical endocrinology and metabolism*. 2014 Jun;99(6):2038-44.
1360. Hadfield RM, Lain SJ, Raynes-Greenow CH, Morris JM, Roberts CL. Is there an association between endometriosis and the risk of pre-eclampsia? A population based study. *Human reproduction*. 2009 Sep;24(9):2348-52.
1361. Hadker N, Garg S, Costanzo C, Miller JD, Foster T, Van Der Helm W, et al. Financial impact of a novel pre-eclampsia diagnostic test versus standard practice: A decision-analytic modeling analysis from a UK healthcare payer perspective. *Journal of Medical Economics*. 2010 December;13(4):728-37.
1362. Hadker N, Garg S, Costanzo C, Van Der Helm W, Creeden J. Are there financial savings associated with supplementing current diagnostic practice for preeclampsia with a novel test? Learnings from a modeling analysis from a German payer perspective. *Hypertension in pregnancy*. 2013;32(2):105-19.
1363. Hadnott TN, Gould HN, Gharib AM, Bondy CA. Outcomes of spontaneous and assisted pregnancies in Turner syndrome: the U.S. National Institutes of Health experience. *Fertility and sterility*. 2011 Jun;95(7):2251-6.
1364. Haeri S, Shauer M, Dale M, Leslie J, Baker AM, Saddlemire S, et al. Obstetric and newborn infant outcomes in human immunodeficiency virus-infected women who receive highly active antiretroviral therapy. *American Journal of Obstetrics and Gynecology*. 2009 September;201(3):315.e1-.e5.
1365. Hafner E, Metzenbauer M, Stumpflen I, Waldhor T. Measurement of placental bed vascularization in the first trimester, using 3D-power-Doppler, for the detection of pregnancies at-risk for fetal and maternal complications. *Placenta*. 2013 October;34(10):892-8.
1366. Hagggar FA, Pereira G, Preen D, D'Arcy Holman C, Einarsdottir K. Adverse obstetric and perinatal outcomes following treatment of adolescent and young adult cancer: A population-based cohort study. *PloS one*. 2014 08 Dec;9(12).
1367. Haggerty CL, Klebanoff MA, Panum I, Uldum SA, Bass DC, Olsen J, et al. Prenatal Chlamydia trachomatis infection increases the risk of preeclampsia. *Pregnancy Hypertension*. 2013 July;3(3):151-4.
1368. Haggerty CL, Panum I, Uldum SA, Bass DC, Olsen J, Darville T, et al. Chlamydia trachomatis



infection may increase the risk of preeclampsia. *Pregnancy Hypertension*. 2013 January;3(1):28-33.

1369. Haggerty CL, Seifert ME, Tang G, Olsen J, Bass DC, Ananth Karumanchi S, et al. Second trimester anti-angiogenic proteins and preeclampsia. *Pregnancy Hypertension*. 2012 April;2(2):158-63.

1370. Haggstrom AN, Drolet BA, Baselga E, Chamlin SL, Garzon MC, Horii KA, et al. Prospective study of infantile hemangiomas: demographic, prenatal, and perinatal characteristics. *The Journal of pediatrics*. 2007 Mar;150(3):291-4.

1371. Hagman A, Kallen K, Barrenas ML, Landin-Wilhelmsen K, Hanson C, Bryman I, et al. Obstetric outcomes in women with turner karyotype. *Journal of Clinical Endocrinology and Metabolism*. 2011 November;96(11):3475-82.

1372. Hagman A, Loft A, Wennerholm UB, Pinborg A, Bergh C, Aittomaki K, et al. Obstetric and neonatal outcome after oocyte donation in 106 women with Turner syndrome: a Nordic cohort study. *Human reproduction*. 2013 Jun;28(6):1598-609.

1373. Hahn S, Holzgreve W. Fetal cells and cell-free fetal DNA in maternal blood: new insights into pre-eclampsia. *Hum Reprod Update*. 2002 Nov-Dec;8(6):501-8.

1374. Hajian-Tilaki K, Esmailzadeh S, Sadeghian G. Trend of stillbirth rates and the associated risk factors in Babol, Northern Iran. *Oman Medical Journal*. 2014;29(1):18-23.

1375. Hakli T, Romppanen EL, Hiltunen M, Helisalmi S, Punnonen K, Heinonen S. Endothelial nitric oxide synthase polymorphism in preeclampsia. *J Soc Gynecol Investig*. 2003 Apr;10(3):154-7.

1376. Hall D. Birthweight and gestational age as predictors of outcome in preterm deliveries for severe pre-eclampsia. *J Trop Pediatr*. 2003 Jun;49(3):178-80.

1377. Hall DR, Odendaal HJ, Kirsten GF, Smith J, Grove D. Expectant management of early onset, severe pre-eclampsia: perinatal outcome. *Bjog*. 2000 Oct;107(10):1258-64.

1378. Hall DR, Odendaal HJ, Steyn DW. Expectant management of severe pre-eclampsia in the mid-trimester. *European journal of obstetrics, gynecology, and reproductive biology*. 2001 Jun;96(2):168-72.

1379. Hall DR, Odendaal HJ, Steyn DW, Grove D. Urinary protein excretion and expectant management of early onset, severe pre-eclampsia. *International journal of gynaecology and obstetrics: the official organ of the International Federation of Gynaecology and Obstetrics*. 2002 Apr;77(1):1-6.

1380. Hall DR, Swart R, Grove D, Odendaal HJ. The influence of maternal age on pregnancy outcome in patients with early onset, severe pre-eclampsia. *Journal of Obstetrics and Gynaecology*. 2001;21(3):246-9.

1381. Hall G, Noble W, Lindow S, Masson E. Long-term sexual co-habitation offers no protection from hypertensive disease of pregnancy. *Human reproduction*. 2001 Feb;16(2):349-52.

1382. Hamed HO, Ahmed SR, Alzolibani A, Kamal MM, Mostafa MS, Gamal RM, et al. Does cutaneous lupus erythematosus have more favorable pregnancy outcomes than systemic disease? A two-center study. *Acta Obstet Gynecol Scand*. 2013 Aug;92(8):934-42.

1383. Hamilton AR, Tyson MD, Braga JA, Lerner LB. Childbearing and pregnancy characteristics of female orthopaedic surgeons. *Journal of Bone and Joint Surgery - Series A*. 2012 06 Jun;94(11):e77.1-e.9.

1384. Hammerova L, Chabada J, Drobny J, Batorova A. Factor V Leiden mutation and its impact on pregnancy complications. *Acta medica (Hradec Kralove) / Universitas Carolina, Facultas Medica Hradec Kralove*. 2011;54(3):117-21.

1385. Hammerova L, Chabada J, Drobny J, Batorova A. Longitudinal evaluation of markers of hemostasis in pregnancy. *Bratislavske lekarske listy*. 2014;115(3):140-4.

1386. Hammoud AO, Bujold E, Sorokin Y, Schild C, Krapp M, Baumann P. Smoking in pregnancy revisited: findings from a large population-based study. *Am J Obstet Gynecol*. 2005 Jun;192(6):1856-62; discussion 62-3.

1387. Hanf M, Friedman E, Basurko C, Roger A, Bruncher P, Dussart P, et al. Dengue epidemics and adverse obstetrical outcomes in French Guiana: A semi-ecological study. *Tropical Medicine and*

International Health. 2014 February;19(2):153-8.

1388. Hanieh S, Ha TT, Simpson JA, Thuy TT, Khuong NC, Thoang DD, et al. Postnatal growth outcomes and influence of maternal gestational weight gain: A prospective cohort study in rural Vietnam. *BMC pregnancy and childbirth*. 2014 September 30;14(1).

1389. Hanita O, Alia NN, Zaleha AM, Nor Azlin MI. Serum soluble FMS-like tyrosine kinase 1 and placental growth factor concentration as predictors of preeclampsia in high risk pregnant women. *Malaysian Journal of Pathology*. 2014 April;36(1):19-26.

1390. Hanke K, Hartz A, Manz M, Bendiks M, Heitmann F, Orlikowsky T, et al. Preterm prelabor rupture of membranes and outcome of very-low-birth-weight infants in the German Neonatal Network. *PLoS one*. 2015 09 Apr;10(4).

1391. Hanouna G, Morel N, Le Thi Huong D, Josselin L, Vauthier-Brouzes D, Saadoun D, et al. Catastrophic antiphospholipid syndrome and pregnancy: An experience of 13 cases. *Rheumatology (United Kingdom)*. 2013 September;52(9):1635-41.

1392. Hanprasertpong T, Kor-anantakul O, Leetanaporn R, Suntharasaj T, Suwanrath C, Pruksanusak N, et al. Pregnancy outcomes amongst thalassemia traits. *Arch Gynecol Obstet*. 2013 Nov;288(5):1051-4.

1393. Hansen AK, Wisborg K, Uldbjerg N, Henriksen TB. Risk of respiratory morbidity in term infants delivered by elective caesarean section: cohort study. *Bmj*. 2008 Jan 12;336(7635):85-7.

1394. Hansen AR, Barnes CM, Folkman J, McElrath TF. Maternal preeclampsia predicts the development of bronchopulmonary dysplasia. *The Journal of pediatrics*. 2010 Apr;156(4):532-6.

1395. Harde M, Dave S, Wagh S, Gujjar P, Bhadade R, Bapat A. Prospective evaluation of maternal morbidity and mortality in post-caesarean section patients admitted to postanesthesia intensive care unit. *Journal of Anaesthesiology Clinical Pharmacology*. 2014 01 Oct;30(4):508-13.

1396. Harkonen J, Kaymakcalan H, Maki P, Taanila A. Prenatal health, educational attainment, and intergenerational inequality: the Northern Finland Birth Cohort 1966 Study. *Demography*. 2012 May;49(2):525-52.

1397. Harlap S, Paltiel O, Deutsch L, Knaanie A, Masalha S, Tiram E, et al. Paternal age and preeclampsia. *Epidemiology (Cambridge, Mass)*. 2002 Nov;13(6):660-7.

1398. Harmon QE, Huang L, Umbach DM, Klungsoyr K, Engel SM, Magnus P, et al. Risk of fetal death with preeclampsia. *Obstet Gynecol*. 2015 Mar;125(3):628-35.

1399. Harper LM, Cahill AG, Stamilio DM, Odibo AO, Peipert JF, Macones GA. Effect of gestational age at the prior cesarean delivery on maternal morbidity in subsequent VBAC attempt. *American Journal of Obstetrics and Gynecology*. 2009 March;200(3):276.e1-.e6.

1400. Harper LM, Chang JJ, Macones GA. Adolescent pregnancy and gestational weight gain: do the Institute of Medicine recommendations apply? *Am J Obstet Gynecol*. 2011 Aug;205(2):140.e1-8.

1401. Harper LM, Odibo AO, Macones GA, Crane JP, Cahill AG. Effect of placenta previa on fetal growth. *Am J Obstet Gynecol*. 2010 Oct;203(4):330.e1-5.

1402. Harper LM, Renth A, Cade WT, Colvin R, Macones GA, Cahill AG. Impact of obesity on maternal and neonatal outcomes in insulin-resistant pregnancy. *Am J Perinatol*. 2014 May;31(5):383-8.

1403. Harper LM, Shanks AL, Odibo AO, Colvin R, Macones GA, Cahill AG. Gestational weight gain in insulin-resistant pregnancies. *Journal of perinatology : official journal of the California Perinatal Association*. 2013 Dec;33(12):929-33.

1404. Harpsoe MC, Jorgensen KT, Frisch M, Jess T. Risk of inflammatory bowel disease according to self-rated health, pregnancy course, and pregnancy complications: a study within the Danish National Birth Cohort. *PLoS one*. 2013;8(3):e59698.

1405. Harrington K, Fayyad A, Thakur V, Aquilina J. The value of uterine artery Doppler in the prediction of uteroplacental complications in multiparous women. *Ultrasound Obstet Gynecol*. 2004 Jan;23(1):50-5.

1406. Harrington K, Kurdi W, Aquilina J, England P, Campbell S. A prospective management study of

- slow-release aspirin in the palliation of uteroplacental insufficiency predicted by uterine artery Doppler at 20 weeks. *Ultrasound Obstet Gynecol.* 2000 Jan;15(1):13-8.
1407. Hartling L, Dryden DM, Guthrie A, Muise M, Vandermeer B, Aktary WM, et al. Screening and diagnosing gestational diabetes mellitus. Evidence report/technology assessment. 2012 Oct(210):1-327.
1408. Hartling L, Dryden DM, Guthrie A, Muise M, Vandermeer B, Donovan L. Diagnostic thresholds for gestational diabetes and their impact on pregnancy outcomes: A systematic review. *Diabetic Medicine.* 2014 March;31(3):319-31.
1409. Harville EW, Viikari JS, Raitakari OT. Preconception cardiovascular risk factors and pregnancy outcome. *Epidemiology (Cambridge, Mass).* 2011 Sep;22(5):724-30.
1410. Hasan JA, Qureshi A, Ramejo BB, Kamran A. Peripartum cardiomyopathy characteristics and outcome in a tertiary care hospital. *JPMA The Journal of the Pakistan Medical Association.* 2010 May;60(5):377-80.
1411. Hasegawa J, Nakamura M, Matsuoka R, Mimura T, Ichizuka K, Sekizawa A, et al. Evaluation of placental function using near infrared spectroscopy during fetal growth restriction. *J Perinat Med.* 2010;38(1):29-32.
1412. Hasegawa J, Sekizawa A, Farina A, Nakamura M, Matsuoka R, Ichizuka K, et al. Location of the placenta or the umbilical cord insertion site in the lowest uterine segment is associated with low maternal blood pressure. *Bjog.* 2011 Nov;118(12):1464-9.
1413. Hashemi S, Ramezani Tehrani F, Hasheminia M, Azizi F. Evaluation the risk of metabolic disorder in women with previous preeclampsia participated in tehran lipid and glucose study. *Iranian Journal of Endocrinology and Metabolism.* 2012;13(6).
1414. Hashemi S, Tehrani FR, Mehrabi Y, Azizi F. Hypertensive pregnancy disorders as a risk factor for future cardiovascular and metabolic disorders (Tehran Lipid and Glucose Study). *Journal of Obstetrics and Gynaecology Research.* 2013 May;39(5):891-7.
1415. Hashimoto K, Kasdaglis T, Jain S, Atkins K, Harman CR, Baschat AA. Isolated low-normal amniotic fluid volume in the early third trimester: association with adverse perinatal outcomes. *J Perinat Med.* 2013 Jul;41(4):349-53.
1416. Hassan I, Junejo AM, Dawani ML. Etiology and outcome of acute renal failure in pregnancy. *Journal of the College of Physicians and Surgeons Pakistan.* 2009 November;19(11):714-7.
1417. Hasson J, Shapira A, Many A, Jaffa A, Har-Toov J. Reduction of twin pregnancy to singleton: Does it improve pregnancy outcome? *Journal of Maternal-Fetal and Neonatal Medicine.* 2011 November;24(11):1362-6.
1418. Hastie CE, Smith GC, Mackay DF, Pell JP. Association between preterm delivery and subsequent C-reactive protein: a retrospective cohort study. *Am J Obstet Gynecol.* 2011 Dec;205(6):556.e1-4.
1419. Hastie CE, Smith GC, Mackay DF, Pell JP. Maternal risk of ischaemic heart disease following elective and spontaneous pre-term delivery: retrospective cohort study of 750 350 singleton pregnancies. *International journal of epidemiology.* 2011 Aug;40(4):914-9.
1420. Hatfield T, Caughey AB, Lagrew DC, Heintz R, Chung JH. The use of ultrasound to detect small-for-gestational-age infants in patients with elevated human chorionic gonadotropin on maternal serum screening. *Am J Perinatol.* 2010 Feb;27(2):173-80.
1421. Hatzidaki E, Giahnakis E, Maraka S, Korakaki E, Manoura A, Saitakis E, et al. Risk factors for periventricular leukomalacia. *Acta Obstet Gynecol Scand.* 2009;88(1):110-5.
1422. Haugen M, Brantsaeter AL, Trogstad L, Alexander J, Roth C, Magnus P, et al. Vitamin D supplementation and reduced risk of preeclampsia in nulliparous women. *Epidemiology (Cambridge, Mass).* 2009 Sep;20(5):720-6.
1423. Haugen M, Brantsaeter AL, Winkvist A, Lissner L, Alexander J, Oftedal B, et al. Associations of pre-pregnancy body mass index and gestational weight gain with pregnancy outcome and postpartum weight retention: a prospective observational cohort study. *BMC pregnancy and childbirth.* 2014;14:201.

1424. Haugen M, Vikanes A, Brantsater AL, Meltzer HM, Grijbovski AM, Magnus P. Diet before pregnancy and the risk of hyperemesis gravidarum. *British Journal of Nutrition*. 2011 28 Aug;106(4):596-602.
1425. Hauger MS, Gibbons L, Vik T, Belizan JM. Prepregnancy weight status and the risk of adverse pregnancy outcome. *Acta Obstet Gynecol Scand*. 2008;87(9):953-9.
1426. Hauser B, Kick J, Asfar P, Ehrmann U, Albicini M, Vogt J, et al. Ethyl pyruvate improves systemic and hepatosplanchnic hemodynamics and prevents lipid peroxidation in a porcine model of resuscitated hyperdynamic endotoxemia. *Crit Care Med*. 2005 Sep;33(9):2034-42.
1427. Hauspy J, Jacquemyn Y, Van Reempts P, Buytaert P, Van Vliet J. Intrauterine versus postnatal transport of the preterm infant: A short-distance experience. *Early Human Development*. 2001;63(1):1-7.
1428. Hawkesworth S. Exploiting dietary supplementation trials to assess the impact of the prenatal environment on CVD risk. *Proceedings of the Nutrition Society*. 2009 February;68(1):78-88.
1429. Hawkins JS, Lo JY, Casey BM, McIntire DD, Leveno KJ. Diet-treated gestational diabetes mellitus: comparison of early vs routine diagnosis. *Am J Obstet Gynecol*. 2008 Mar;198(3):287.e1-6.
1430. Hawkins TL, Roberts JM, Mangos GJ, Davis GK, Roberts LM, Brown MA. Plasma uric acid remains a marker of poor outcome in hypertensive pregnancy: a retrospective cohort study. *Bjog*. 2012 Mar;119(4):484-92.
1431. Hayakawa H, Itakura A, Mitsui T, Okada M, Suzuki M, Tamakoshi K, et al. Methods for myometrium closure and other factors impacting effects on cesarean section scars of the uterine segment detected by the ultrasonography. *Acta Obstetrica et Gynecologica Scandinavica*. 2006 March;85(4):429-34.
1432. Hayashi M, Ohkura T, Inaba N. Elevation of serum macrophage colony-stimulating factor before the clinical manifestations of preeclampsia. *American Journal of Obstetrics and Gynecology*. 2003 November;189(5):1356-60.
1433. Hayes EJ, Paul D, Ness A, Mackley A, Berghella V. Very-low-birthweight neonates: Do outcomes differ in multiple compared with singleton gestations? *American Journal of Perinatology*. 2007 June;24(6):373-6.
1434. Hayward K, Wallace CA, Koepsell T. Perinatal exposures and kawasaki disease in Washington State: A population-based, case-control study. *Pediatric Infectious Disease Journal*. 2012 October;31(10):1027-31.
1435. Healy AJ, Malone FD, Sullivan LM, Porter TF, Luthy DA, Comstock CH, et al. Early access to prenatal care: implications for racial disparity in perinatal mortality. *Obstet Gynecol*. 2006 Mar;107(3):625-31.
1436. Hebral AL, Cointault O, Connan L, Congy-Jolivet N, Esposito L, Cardeau-Desangles I, et al. Pregnancy after kidney transplantation: Outcome and anti-human leucocyte antigen alloimmunization risk. *Nephrology Dialysis Transplantation*. 2014;29(9):1786-93.
1437. Hedderson MM, Darbinian JA, Sridhar SB, Quesenberry CP. Prepregnancy cardiometabolic and inflammatory risk factors and subsequent risk of hypertensive disorders of pregnancy. *American Journal of Obstetrics and Gynecology*. 2012 July;207(1):68.e1-.e9.
1438. Hedderson MM, Ferrara A, Sacks DA. Gestational diabetes mellitus and lesser degrees of pregnancy hyperglycemia: Association with increased risk of spontaneous preterm birth. *Obstetrics and Gynecology*. 2003 01 Oct;102(4):850-6.
1439. Hefler LA, Tempfer CB, Bancher-Todesca D, Schatten C, Husslein P, Heinze G, et al. Placental expression and serum levels of cytokeratin-18 are increased in women with preeclampsia. *J Soc Gynecol Investig*. 2001 May-Jun;8(3):169-73.
1440. Hegaard HK, Ottesen B, Hedegaard M, Petersson K, Henriksen TB, Damm P, et al. The association between leisure time physical activity in the year before pregnancy and pre-eclampsia. *Journal of*

obstetrics and gynaecology : the journal of the Institute of Obstetrics and Gynaecology. 2010 Jan;30(1):21-4.

1441. Heggermont WA, Verhelst C, De Wilde K, De Paepe M, Lacquet F, Vonck A. A case of HELLP syndrome: an immuno-"logical" approach. *Acta clinica Belgica*. 2012 Sep-Oct;67(5):375-7.

1442. Heida KY, Zeeman GG, Van Veen TR, Hulzebos CV. Neonatal side effects of maternal labetalol treatment in severe preeclampsia. *Early Hum Dev*. 2012 Jul;88(7):503-7.

1443. Heidrich MB, Wenzel D, von Kaisenberg CS, Schippert C, von Versen-Hoyneck FM. Preeclampsia and long-term risk of cardiovascular disease: What do obstetrician-gynecologists know? *BMC pregnancy and childbirth*. 2013 09 Mar;13(61).

1444. Heikkila A, Makkonen N, Heinonen S, Kirkinen P. Elevated maternal serum hCG in the second trimester increases prematurity rate and need for neonatal intensive care in primiparous preeclamptic pregnancies. *Hypertension in pregnancy*. 2001;20(1):99-106.

1445. Heikkinen T, Young J, van Beek E, Franke H, Verstraeten T, Weil JG, et al. Safety of MF59-adjuvanted A/H1N1 influenza vaccine in pregnancy: a comparative cohort study. *Am J Obstet Gynecol*. 2012 Sep;207(3):177.e1-8.

1446. Heilmann L, Schorch M, Hahn T, Adasz G, Schilberz K, Adiguzel C, et al. Pregnancy outcome in women with antiphospholipid antibodies: Report on a retrospective study. *Seminars in Thrombosis and Hemostasis*. 2008 November;34(8):794-802.

1447. Heilmann L, Schorsch M, Hahn T, Fareed J. Antiphospholipid syndrome and pre-eclampsia. *Seminars in Thrombosis and Hemostasis*. 2011;37(2):141-5.

1448. Heilmann L, Tempelhoff GFV, Pollow K. Antiphospholipid syndrome in obstetrics. *Clinical and Applied Thrombosis/Hemostasis*. 2003 April;9(2):143-50.

1449. Heinonen K, Raikonen K, Pesonen AK, Andersson S, Kajantie E, Eriksson JG, et al. Longitudinal study of smoking cessation before pregnancy and children's cognitive abilities at 56 months of age. *Early Hum Dev*. 2011 May;87(5):353-9.

1450. Heinonen PK. Gestational hypertension and preeclampsia associated with unilateral renal agenesis in women with uterine malformations. *European journal of obstetrics, gynecology, and reproductive biology*. 2004 May 10;114(1):39-43.

1451. Heinonen S, Saarikoski S. Reproductive risk factors, pregnancy characteristics and obstetric outcome in female doctors. *Bjog*. 2002 Mar;109(3):261-4.

1452. Heiskanen J, Romppanen EL, Hiltunen M, Iivonen S, Mannermaa A, Punnonen K, et al. Polymorphism in the tumor necrosis factor-alpha gene in women with preeclampsia. *J Assist Reprod Genet*. 2002 May;19(5):220-3.

1453. Heiskanen JT, Pirskanen MM, Hiltunen MJ, Mannermaa AJ, Punnonen KR, Heinonen ST. Insertion-deletion polymorphism in the gene for angiotensin-converting enzyme is associated with obstetric cholestasis but not with preeclampsia. *Am J Obstet Gynecol*. 2001 Sep;185(3):600-3.

1454. Heller DS, Keane-Tarchichi M, Varshney S. Is pathologic confirmation of placental abruption more reliable in cases due to chronic etiologies compared with acute etiologies? *J Perinat Med*. 2013 Nov;41(6):701-3.

1455. Henderson JJ, McWilliam OA, Newnham JP, Pennell CE. Preterm birth aetiology 2004-2008. Maternal factors associated with three phenotypes: Spontaneous preterm labour, preterm pre-labour rupture of membranes and medically indicated preterm birth. *Journal of Maternal-Fetal and Neonatal Medicine*. 2012 June;25(6):642-7.

1456. Hendler I, Schatz M, Momirova V, Wise R, Landon M, Mabie W, et al. Association of obesity with pulmonary and nonpulmonary complications of pregnancy in asthmatic women. *Obstet Gynecol*. 2006 Jul;108(1):77-82.

1457. Henne MB, Zhang M, Paroski S, Kelshikar B, Westphal LM. Comparison of obstetric outcomes in recipients of donor oocytes vs. women of advanced maternal age with autologous oocytes. *The Journal*

of reproductive medicine. 2007 Jul;52(7):585-90.

1458. Henriques AC, Carvalho FH, Feitosa HN, Macena RH, Mota RM, Alencar JC. Endothelial dysfunction after pregnancy-induced hypertension. *International journal of gynaecology and obstetrics: the official organ of the International Federation of Gynaecology and Obstetrics*. 2014 Mar;124(3):230-4.

1459. Henry DE, McElrath TF, Smith NA. Preterm severe preeclampsia in singleton and twin pregnancies. *Journal of perinatology : official journal of the California Perinatal Association*. 2013 Feb;33(2):94-7.

1460. Henry EB, Patterson CC, Cardwell CR. A meta-analysis of the association between pre-eclampsia and childhood-onset Type 1 diabetes mellitus. *Diabetic medicine : a journal of the British Diabetic Association*. 2011 Aug;28(8):900-5.

1461. Hermes W, Franx A, van Pampus MG, Bloemenkamp KW, Bots ML, van der Post JA, et al. Cardiovascular risk factors in women who had hypertensive disorders late in pregnancy: a cohort study. *Am J Obstet Gynecol*. 2013 Jun;208(6):474.e1-8.

1462. Hermes W, Franx A, van Pampus MG, Bloemenkamp KW, van der Post JA, Porath M, et al. 10-Year cardiovascular event risks for women who experienced hypertensive disorders in late pregnancy: the HyRAS study. *BMC pregnancy and childbirth*. 2010;10:28.

1463. Hermes W, Koopmans CM, Van Pampus MG, Franx A, Bloemenkamp KWM, Van Der Post J, et al. Induction of labour or expectant monitoring in hypertensive pregnancy disorders at term: Do women's postpartum cardiovascular risk factors differ between the two strategies? *European Journal of Obstetrics Gynecology and Reproductive Biology*. 2013 November;171(1):30-4.

1464. Hermes W, Tamsma JT, Grootendorst DC, Franx A, van der Post J, van Pampus MG, et al. Cardiovascular risk estimation in women with a history of hypertensive pregnancy disorders at term: a longitudinal follow-up study. *BMC pregnancy and childbirth*. 2013;13:126.

1465. Hermida RC, Ayala DE, Calvo C, Lopez JE. Aspirin administered at bedtime, but not on awakening, has an effect on ambulatory blood pressure in hypertensive patients. *J Am Coll Cardiol*. 2005 Sep 20;46(6):975-83.

1466. Hernandez RK, Mitchell AA, Werler MM. Decongestant use during pregnancy and its association with preterm delivery. *Birth defects research Part A, Clinical and molecular teratology*. 2010 Sep;88(9):715-21.

1467. Hernandez-Diaz S, Toh S, Cnattingius S. Risk of pre-eclampsia in first and subsequent pregnancies: prospective cohort study. *Bmj*. 2009;338:b2255.

1468. Hernandez-Diaz S, Werler MM, Louik C, Mitchell AA. Risk of gestational hypertension in relation to folic acid supplementation during pregnancy. *American journal of epidemiology*. 2002 Nov 1;156(9):806-12.

1469. Hernandez-Diaz S, Werler MM, Mitchell AA. Gestational hypertension in pregnancies supported by infertility treatments: role of infertility, treatments, and multiple gestations. *Fertility and sterility*. 2007 Aug;88(2):438-45.

1470. Hernandez-Martinez A, Pascual-Pedreno AI, Bano-Garnes AB, Del Rocio Melero-Jimenez M, Molina-Alarcon M. Relation between induced labour indications and neonatal morbidity. *Arch Gynecol Obstet*. 2014 Dec;290(6):1093-9.

1471. Hernandez-Mendez EA, Arreola-Guerra JM, Morales-Buenrostro LE, Ramirez JB, Calleja S, Castelan N, et al. Pre-nephrectomy angiotensin II type 1 receptor antibodies in living kidney donors: A concern? *Clin Transpl*. 2013:351-5.

1472. Herraiz I, Arbues J, Camano I, Gomez-Montes E, Graneras A, Galindo A. Application of a first-trimester prediction model for pre-eclampsia based on uterine arteries and maternal history in high-risk pregnancies. *Prenatal diagnosis*. 2009 December;29(12):1123-9.

1473. Herraiz I, Escribano D, Gomez-Arriaga PI, Hernandez-Garcia JM, Herraiz MA, Galindo A. Predictive value of sequential models of uterine artery Doppler in pregnancies at high risk for pre-eclampsia.

Ultrasound Obstet Gynecol. 2012 Jul;40(1):68-74.

1474. Herraiz I, Lopez-Jimenez EA, Garcia-Burguillo A, Nieto O, Villar OP, Escribano D, et al. Role of uterine artery Doppler in interpreting low PAPP-A values in first-trimester screening for Down syndrome in pregnancies at high risk of impaired placentation. *Ultrasound Obstet Gynecol.* 2009 May;33(5):518-23.

1475. Herrmann W. The importance of hyperhomocysteinemia as a risk factor for diseases: An overview. *Clinical Chemistry and Laboratory Medicine.* 2001;39(8):666-74.

1476. Herse F, Verlohren S, Wenzel K, Pape J, Muller DN, Modrow S, et al. Prevalence of agonistic autoantibodies against the angiotensin II type 1 receptor and soluble fms-like tyrosine kinase 1 in a gestational age-matched case study. *Hypertension.* 2009 Feb;53(2):393-8.

1477. Hertig A, Fort J, Lefevre G, Chabbert-Buffet N, Uzan M, Rondeau E, et al. Soluble endoglin in preeclamptic patients with or without HELLP syndrome. *Am J Obstet Gynecol.* 2010 Jun;202(6):594.e1-4.

1478. Herzog M, Cerar LK, Srsen TP, Verdenik I, Lucovnik M. Impact of risk factors other than prematurity on periventricular leukomalacia. A population-based matched case control study. *European Journal of Obstetrics Gynecology and Reproductive Biology.* 2015 01 Apr;187:57-9.

1479. Heshmati A, Mishra G, Koupil I. Childhood and adulthood socio-economic position and hypertensive disorders in pregnancy: the Uppsala Birth Cohort Multigenerational Study. *Journal of epidemiology and community health.* 2013 Nov 1;67(11):939-46.

1480. Hibbs AM, Johnson NL, Rosen CL, Kirchner HL, Martin R, Storer-Isser A, et al. Prenatal and neonatal risk factors for sleep disordered breathing in school-aged children born preterm. *The Journal of pediatrics.* 2008 Aug;153(2):176-82.

1481. Hidalgo LA, Chedraui PA, Chavez MJ. Obstetrical and neonatal outcome in young adolescents of low socio-economic status: a case control study. *Arch Gynecol Obstet.* 2005 Mar;271(3):207-11.

1482. Hietala R, Pohja-Nylander P, Rutanen EM, Laatikainen T. Serum insulin-like growth factor binding protein-1 at 16 weeks and subsequent preeclampsia. *Obstet Gynecol.* 2000 Feb;95(2):185-9.

1483. Hietala R, Turpeinen U, Laatikainen T. Serum homocysteine at 16 weeks and subsequent preeclampsia. *Obstet Gynecol.* 2001 Apr;97(4):527-9.

1484. Higgins N, Leong E, Park CS, Facco FL, McCarthy RJ, Wong CA. The Berlin Questionnaire for assessment of sleep disordered breathing risk in parturients and non-pregnant women. *Int J Obstet Anesth.* 2011 Jan;20(1):22-5.

1485. Highet AR, Berry AM, Goldwater PN. Novel hypothesis for unexplained sudden unexpected death in infancy (SUDI). *Archives of Disease in Childhood.* 2009 November;94(11):841-3.

1486. Highet AR, Gibson CS, Goldwater PN. CD14 (C-260T) polymorphism is not associated with sudden infant death syndrome (SIDS) in a large South Australian cohort. *Innate immunity.* 2011 Feb;17(3):321-6.

1487. Hiilesmaa V, Suhonen L, Teramo K. Glycaemic control is associated with pre-eclampsia but not with pregnancy-induced hypertension in women with type I diabetes mellitus. *Diabetologia.* 2000 Dec;43(12):1534-9.

1488. Hiller JE, Crowther CA, Moore VA, Willson K, Robinson JS. Calcium supplementation in pregnancy and its impact on blood pressure in children and women: follow up of a randomised controlled trial. *The Australian & New Zealand journal of obstetrics & gynaecology.* 2007 Apr;47(2):115-21.

1489. Hillesund ER, Overby NC, Engel SM, Klungsoyr K, Harmon QE, Haugen M, et al. Associations of adherence to the New Nordic Diet with risk of preeclampsia and preterm delivery in the Norwegian Mother and Child Cohort Study (MoBa). *Eur J Epidemiol.* 2014 Oct;29(10):753-65.

1490. Hiltunen LM, Laivuori H, Rautanen A, Kaaja R, Kere J, Krusius T, et al. Blood group AB and factor V Leiden as risk factors for pre-eclampsia: A population-based nested case-control study. *Thrombosis Research.* 2009 June;124(2):167-73.

1491. Hinder F, Stubbe HD, Van Aken H, Baba HA, Jahn UR, Brodner G, et al. Early multiple organ failure after recurrent endotoxemia in the presence of vasoconstrictor-masked hypovolemia. *Crit Care Med.* 2003 Mar;31(3):903-9.
1492. Hirashima C, Ohkuchi A, Takahashi K, Suzuki H, Matsuda Y, Matsubara S, et al. Additive effects of mean blood pressure and bilateral notching in the second trimester on subsequent angiogenesis-related factors. *Hypertension research : official journal of the Japanese Society of Hypertension.* 2014 Jan;37(1):76-81.
1493. Hirsch D, Levy S, Nadler V, Kopel V, Shainberg B, Toledano Y. Pregnancy outcomes in women with severe hypothyroidism. *European Journal of Endocrinology.* 2013 September;169(3):313-20.
1494. Hjern A, Thorngren-Jerneck K. Perinatal complications and socio-economic differences in cerebral palsy in Sweden - A national cohort study. *BMC Pediatrics.* 2008 30 Oct;8(49).
1495. Ho JT, Lewis JG, O'Loughlin P, Bagley CJ, Romero R, Dekker GA, et al. Reduced maternal corticosteroid-binding globulin and cortisol levels in pre-eclampsia and gamete recipient pregnancies. *Clin Endocrinol (Oxf).* 2007 Jun;66(6):869-77.
1496. Hodnett PA, Maher MM. Imaging of gastrointestinal and hepatic diseases during pregnancy. *Best Practice and Research in Clinical Gastroenterology.* 2007 October;21(5):901-17.
1497. Hoedjes M, Berks D, Vogel I, Franx A, Bangma M, Darlington ASE, et al. Postpartum depression after mild and severe preeclampsia. *Journal of Women's Health.* 2011 01 Oct;20(10):1535-42.
1498. Hoekstra J, Seijo S, Rautou PE, Ducarme G, Boudaoud L, Luton D, et al. Pregnancy in women with portal vein thrombosis: results of a multicentric European study on maternal and fetal management and outcome. *J Hepatol.* 2012 Dec;57(6):1214-9.
1499. Hoffmann E, Hedlund E, Perin T, Lyndrup J. Is thrombophilia a risk factor for placenta-mediated pregnancy complications? *Arch Gynecol Obstet.* 2012 Sep;286(3):585-9.
1500. Hogberg U, Holmgren PA. Infant mortality of very preterm infants by mode of delivery, institutional policies and maternal diagnosis. *Acta Obstet Gynecol Scand.* 2007;86(6):693-700.
1501. Hogberg V, Rasmussen S, Irgens LM. The effect of smoking and hypertensive disorders on abruptio placentae in Norway 1999-2002. *Acta Obstetrica et Gynecologica Scandinavica.* 2007;86(3):304-9.
1502. Hogge WA, Prosen TL, Lanasa MC, Huber HA, Reeves MF. Recurrent spontaneous abortion and skewed X-inactivation: is there an association? *Am J Obstet Gynecol.* 2007 Apr;196(4):384.e1-6; discussion .e6-8.
1503. Hohlagschwandtner M, Knofler M, Ploner M, Zeisler H, Joura EA, Husslein P. Basic fibroblast growth factor and hypertensive disorders in pregnancy. *Hypertension in pregnancy.* 2002;21(3):235-41.
1504. Hoirisch-Clapauch S, Benchimol-Barbosa PR. Markers of insulin resistance and sedentary lifestyle are predictors of preeclampsia in women with adverse obstetric results. *Brazilian Journal of Medical and Biological Research.* 2011 December;44(12):1285-90.
1505. Hoke M, Kyrle PA, Philipp K, Pabinger I, Kaider A, Schonauer V, et al. Prospective evaluation of coagulation activation in pregnant women receiving low-molecular weight heparin. *Thrombosis and Haemostasis.* 2004 May;91(5):935-40.
1506. Hollowell JG. Outcome of pregnancy in women with a history of vesico-ureteric reflux. *BJU international.* 2008 Sep;102(7):780-4.
1507. Holm M, Msall ME, Skranes J, Dammann O, Allred E, Leviton A. Antecedents and correlates of visual field deficits in children born extremely preterm. *European Journal of Paediatric Neurology.* 2015 01 Jan;19(1):56-63.
1508. Holmes LB, Hernandez-Diaz S. Newer anticonvulsants: Lamotrigine, topiramate and gabapentin. *Birth Defects Research Part A - Clinical and Molecular Teratology.* 2012 August;94(8):599-606.
1509. Holmes VA, Wallace JM, Alexander HD, Gilmore WS, Bradbury I, Ward M, et al. Homocysteine is lower in the third trimester of pregnancy in women with enhanced folate status from continued folic



acid supplementation. *Clin Chem*. 2005 Mar;51(3):629-34.

1510. Holmes VA, Wallace JMW, Alexander HD, Gilmore WS, Bradbury I, Ward M, et al. Homocysteine is lower in the third trimester of pregnancy in women with enhanced from continued folic acid supplementation. *Clinical Chemistry*. 2005 March;51(3):629-34.

1511. Holmes VA, Young IS, Patterson CC, Pearson DWM, Walker JD, Maresh MJA, et al. Optimal glycemic control, pre-eclampsia, and gestational hypertension in women with type 1 diabetes in the Diabetes and Pre-Eclampsia Intervention Trial. *Diabetes Care*. 2011 August;34(8):1683-8.

1512. Holub M, Bodamer OA, Item C, Muhl A, Pollak A, Stockler-Ipsiroglu S. Lack of correlation between fatty acid oxidation disorders and haemolysis, elevated liver enzymes, low platelets (HELLP) syndrome? *Acta paediatrica (Oslo, Norway : 1992)*. 2005 Jan;94(1):48-52.

1513. Holzgreve W, Zhong XY, Burk MR, Hahn S. Enrichment of fetal cells and free fetal DNA from maternal blood: An insight into the Basel experience. *Early Pregnancy*. 2001 Jan;5(1):43-4.

1514. Holzman C, Senagore PK, Wang J. Mononuclear leukocyte infiltrate in extraplacental membranes and preterm delivery. *American journal of epidemiology*. 2013 15 May;177(10):1053-64.

1515. Holzmann M, Wretler S, Cnattingius S, Nordstrom L. Neonatal outcome and delivery mode in labors with repetitive fetal scalp blood sampling. *European Journal of Obstetrics Gynecology and Reproductive Biology*. 2015 01 Jan;184:97-102.

1516. Homer CS, Brown MA, Mangos G, Davis GK. Non-proteinuric pre-eclampsia: a novel risk indicator in women with gestational hypertension. *J Hypertens*. 2008 Feb;26(2):295-302.

1517. Homer CSE, Thornton C, Scarf VL, Ellwood DA, Oats JJN, Foureur MJ, et al. Birthplace in New South Wales, Australia: An analysis of perinatal outcomes using routinely collected data. *BMC pregnancy and childbirth*. 2014 14 Jun;14(1).

1518. Hoogsteder PH, Kruse AJ, Sep SJ, Dassen WR, Gorgels AP, Peeters LL. Electrocardiographic findings in women with a recent history of pre-eclampsia. *Acta Obstet Gynecol Scand*. 2012 Mar;91(3):372-8.

1519. Hoover RN, Hyer M, Pfeiffer RM, Adam E, Bond B, Cheville AL, et al. Adverse health outcomes in women exposed in utero to diethylstilbestrol. *N Engl J Med*. 2011 Oct 6;365(14):1304-14.

1520. Hoque M. Incidence of obstetric and foetal complications during labor and delivery at a community health centre, midwives obstetric unit of Durban, South Africa. *ISRN Obstetrics and Gynecology*. 2011(259308).

1521. Hoque M, Hoque E, Kader SB. Pregnancy complications of gradmultiparity at a rural setting of South Africa. *Iranian Journal of Reproductive Medicine*. 2008;6(1):25-31.

1522. Hoque M, Hoque S. Comparison of perinatal and obstetrics outcomes among early adolescents, late adolescents and adult pregnant women from rural South Africa. *East Afr J Public Health*. 2010 Jun;7(2):171-6.

1523. Horev A, Weintraub AY, Sergienko R, Wiznitzer A, Halevy S, Sheiner E. Pregnancy outcome in women with vitiligo. *International Journal of Dermatology*. 2011 September;50(9):1083-5.

1524. Horgan SJ, Margey R, Brennan DJ, O'Herlihy C, Mahon NG. Natural history, management, and outcomes of peripartum cardiomyopathy: an Irish single-center cohort study. *The journal of maternal-fetal & neonatal medicine : the official journal of the European Association of Perinatal Medicine, the Federation of Asia and Oceania Perinatal Societies, the International Society of Perinatal Obstet*. 2013 Jan;26(2):161-5.

1525. Horton AL, Boggess KA, Moss KL, Beck J, Offenbacher S. Periodontal disease, oxidative stress, and risk for preeclampsia. *J Periodontol*. 2010 Feb;81(2):199-204.

1526. Horvath B, Bodecs T, Boncz I, Bodis J. Metabolic syndrome in normal and complicated pregnancies. *Metab Syndr Relat Disord*. 2013 Jun;11(3):185-8.

1527. Hossain N, Khan N, Khan NH. Obstetric causes of stillbirth at low socioeconomic settings. *JPMA The Journal of the Pakistan Medical Association*. 2009 Nov;59(11):744-7.

1528. Hossain N, Khan N, Shah N, Shah T, Butt S, Khanani R. Spot urine protein-creatinine ratio and 24-h urine protein excretion: Diagnostic accuracy in women with pre-eclampsia. *Pregnancy Hypertension*. 2014 January;4(1):87-90.
1529. Hosseini MS, Yaghoobipour S. Late pregnancy outcomes in women with vaginal bleeding in their first trimester. *Journal of Obstetrics and Gynecology of India*. 2013;63(5):311-5.
1530. Hossein-nezhad A, Mirzaei K, Ahmadi S, Maghbooli Z, Karimi F. Comparison of incidence of pregnancy induced hypertension in gestational diabetes mellitus and healthy pregnant women. *Iranian Journal of Diabetes and Lipid Disorders*. 2011;10:1-9.
1531. Hou JL, Wan XR, Xiang Y, Qi QW, Yang XY. Changes of clinical features in hydatidiform mole: analysis of 113 cases. *The Journal of reproductive medicine*. 2008 Aug;53(8):629-33.
1532. Hounton SH, Sombie I, Townend J, Ouedraogo T, Meda N, Graham WJ. The tip of the iceberg: evidence of seasonality in institutional maternal mortality and implications for health resources management in Burkina Faso. *Scandinavian journal of public health*. 2008 May;36(3):310-7.
1533. Hovsepian DA, Sriram N, Kamel H, Fink ME, Navi BB. Acute cerebrovascular disease occurring after hospital discharge for labor and delivery. *Stroke*. 2014 Jul;45(7):1947-50.
1534. Hrazdilova O, Unzeitig V, Znojil V, Izakovicova-Holla L, Janku P, Vasku A. Relationship of age and the body mass index to selected hypertensive complications in pregnancy. *International journal of gynaecology and obstetrics: the official organ of the International Federation of Gynaecology and Obstetrics*. 2001 Nov;75(2):165-9.
1535. Hristoskova S, Holzgreve W, Xiao YZ, Hahn S. Macrophage migration inhibition factor is elevated in pregnancy, but not to a greater extent in preeclampsia. *Archives of Gynecology and Obstetrics*. 2006 April;274(1):25-8.
1536. Hromadnikova I, Kotlabova K, Doucha J, Dlouha K, Krofta L. Absolute and relative quantification of placenta-specific micrnas in maternal circulation with placental insufficiency-related complications. *The Journal of molecular diagnostics : JMD*. 2012 Mar-Apr;14(2):160-7.
1537. Hu R, Li Y, Zhang Z, Yan W. Antenatal depressive symptoms and the risk of preeclampsia or operative deliveries: A meta-analysis. *PloS one*. 2015 19 Mar;10(3).
1538. Hua M, Odibo AO, Macones GA, Roehl KA, Crane JP, Cahill AG. Single umbilical artery and its associated findings. *Obstet Gynecol*. 2010 May;115(5):930-4.
1539. Huang CJ, Fan YC, Tsai PS. Differential impacts of modes of anaesthesia on the risk of stroke among preeclamptic women who undergo Caesarean delivery: A population-based study. *British Journal of Anaesthesia*. 2010 December;105(6):818-26.
1540. Huang JY, Qiu C, Miller RS, Siscovick DS, Williams MA, Enquobahrie DA. Maternal birthweight is associated with subsequent risk of vitamin D deficiency in early pregnancy. *Paediatric and perinatal epidemiology*. 2013 Sep;27(5):472-80.
1541. Huang T, Hoffman B, Meschino W, Kingdom J, Okun N. Prediction of adverse pregnancy outcomes by combinations of first and second trimester biochemistry markers used in the routine prenatal screening of Down syndrome. *Prenatal diagnosis*. 2010 May;30(5):471-7.
1542. Huang X, Tan H, Li X, Zhou S, Wen SW, Luo M. Maternal chronic HBV infection would not increase the risk of pregnancy-induced hypertension - Results from pregnancy cohort in Liuyang Rural China. *PloS one*. 2014 05 Dec;9(12).
1543. Hubel CA, Powers RW, Snaedal S, Gammill HS, Ness RB, Roberts JM, et al. C-reactive protein is elevated 30 years after eclamptic pregnancy. *Hypertension*. 2008 01 Jun;51(6):1499-505.
1544. Hubinette A, Lichtenstein P, Brismar K, Vatten L, Jacobsen G, Ekblom A, et al. Serum insulin-like growth factors in normal pregnancy and in pregnancies complicated by preeclampsia. *Acta Obstet Gynecol Scand*. 2003 Nov;82(11):1004-9.
1545. Huchon C, Dumont A, Traore M, Abrahamowicz M, Fauconnier A, Fraser W, et al. A prediction score for maternal mortality in Senegal and Mali. *Obstet Gynecol*. 2013 May;121(5):1049-56.

1546. Huddy CL, Johnson A, Hope PL. Educational and behavioural problems in babies of 32-35 weeks gestation. *Archives of disease in childhood Fetal and neonatal edition*. 2001 Jul;85(1):F23-8.
1547. Hudic I, Radoncic F, Fatuic Z. Incidence and causes of maternal death during 20-year period (1986-2005) in Tuzla Canton, Bosnia and Herzegovina. *Journal of Maternal-Fetal and Neonatal Medicine*. 2011 October;24(10):1286-8.
1548. Hughes RC, Moore MP, Gullam JE, Mohamed K, Rowan J. An early pregnancy HbA1c  $\geq$ 5.9% (41 mmol/mol) is optimal for detecting diabetes and identifies women at increased risk of adverse pregnancy outcomes. *Diabetes Care*. 2014 Nov;37(11):2953-9.
1549. Hughes SM, Amadi B, Mwiya M, Nkamba H, Tomkins A, Goldblatt D. Dendritic cell anergy results from endotoxemia in severe malnutrition. *Journal of immunology (Baltimore, Md : 1950)*. 2009 Aug 15;183(4):2818-26.
1550. Huilaja L, Makikallio K, Sormunen R, Lohi J, Hurskainen T, Tasanen K. Gestational pemphigoid: placental morphology and function. *Acta dermato-venereologica*. 2013 Jan;93(1):33-8.
1551. Huisma F, Thomas M, Armstrong L. Severe hypospadias and its association with maternal-placental factors. *American journal of medical genetics Part A*. 2013 Sep;161a(9):2183-7.
1552. Hund M, Verhagen-Kamerbeek W, Reim M, Messinger D, Van Der Does R, Stepan H. Influence of the sFlt-1/PlGF ratio on clinical decision-making in women with suspected preeclampsia - The PreOS study protocol. *Hypertension in pregnancy*. 2015 01 Feb;34(1):102-15.
1553. Hung TH, Chen SF, Lo LM, Li MJ, Yeh YL, Hsieh TT. Myeloperoxidase in the plasma and placenta of normal pregnant women and women with pregnancies complicated by preeclampsia and intrauterine growth restriction. *Placenta*. 2012 Apr;33(4):294-303.
1554. Hung TH, Lo LM, Chiu TH, Li MJ, Yeh YL, Chen SF, et al. A longitudinal study of oxidative stress and antioxidant status in women with uncomplicated pregnancies throughout gestation. *Reprod Sci*. 2010 Apr;17(4):401-9.
1555. Hunt RW, Badawi N, Laing S, Lam A. Pre-eclampsia: A predisposing factor for neonatal venous sinus thrombosis? *Pediatric Neurology*. 2001;25(3):242-6.
1556. Huong DL, Wechsler B, Bletry O, Vauthier-Brouzes D, Lefebvre G, Piette JC. A study of 75 pregnancies in patients with antiphospholipid syndrome. *The Journal of rheumatology*. 2001 Sep;28(9):2025-30.
1557. Huong DL, Wechsler B, Vauthier-Brouzes D, Beaufils H, Lefebvre G, Piette JC. Pregnancy in past or present lupus nephritis: a study of 32 pregnancies from a single centre. *Ann Rheum Dis*. 2001 Jun;60(6):599-604.
1558. Huppertz B, Sammar M, Chefetz I, Neumaier-Wagner P, Bartz C, Meiri H. Longitudinal determination of serum placental protein 13 during development of preeclampsia. *Fetal Diagn Ther*. 2008;24(3):230-6.
1559. Hupuczi P, Rigo B, Sziller I, Szabo G, Szigeti Z, Papp Z. Follow-up analysis of pregnancies complicated by HELLP syndrome. *Fetal Diagn Ther*. 2006;21(6):519-22.
1560. Hussain N, Chaghtai A, Herndon CD, Herson VC, Rosenkrantz TS, McKenna PH. Hypospadias and early gestation growth restriction in infants. *Pediatrics*. 2002 Mar;109(3):473-8.
1561. Hussein M, Mooij JM, Roujouleh H. Factor analysis, including antihypertensive medication, of the outcome of pregnancy in pregnancy-associated hypertension. *Kidney & blood pressure research*. 2001;24(2):124-8.
1562. Huston JM, Gallowitsch-Puerta M, Ochani M, Ochani K, Yuan R, Rosas-Ballina M, et al. Transcutaneous vagus nerve stimulation reduces serum high mobility group box 1 levels and improves survival in murine sepsis. *Crit Care Med*. 2007 Dec;35(12):2762-8.
1563. Huxtable LM, Tafreshi MJ, Ondreyco SM. A protocol for the use of enoxaparin during pregnancy: Results from 85 pregnancies including 13 multiple gestation pregnancies. *Clinical and Applied Thrombosis/Hemostasis*. 2005 April;11(2):171-81.

1564. Hypponen E, Cavadino A, Williams D, Fraser A, Vereczkey A, Fraser WD, et al. Vitamin D and pre-eclampsia: original data, systematic review and meta-analysis. *Annals of nutrition & metabolism*. 2013;63(4):331-40.
1565. Hypponen E, Hartikainen AL, Sovio U, Jarvelin MR, Pouta A. Does vitamin D supplementation in infancy reduce the risk of pre-eclampsia? *Eur J Clin Nutr*. 2007 Sep;61(9):1136-9.
1566. Ibele A, Flake A, Shaaban A. Survival of a profoundly hydropic fetus with a sacrococcygeal teratoma delivered at 27 weeks of gestation for maternal mirror syndrome. *J Pediatr Surg*. 2008 Aug;43(8):e17-20.
1567. Ibrahim HN, Akkina SK, Leister E, Gillingham K, Cordner G, Guo H, et al. Pregnancy outcomes after kidney donation. *American Journal of Transplantation*. 2009 April;9(4):825-34.
1568. Ibrahim ZM, Metawie MAE, El-Baz AM, El-Bahie MA. Methylenetetrahydrofolate C677T polymorphism and pre-eclamptic Egyptian women. *Middle East Fertility Society Journal*. 2012 June;17(2):105-10.
1569. Idris I, Srinivasan R, Simm A, Page RC. Maternal hypothyroidism in early and late gestation: effects on neonatal and obstetric outcome. *Clin Endocrinol (Oxf)*. 2005 Nov;63(5):560-5.
1570. Igwegbe AO, Eleje GU, Ugboaja JO, Ofiaeli RO. Improving maternal mortality at a university teaching hospital in Nnewi, Nigeria. *International journal of gynaecology and obstetrics: the official organ of the International Federation of Gynaecology and Obstetrics*. 2012 Mar;116(3):197-200.
1571. Igwegbe AO, Udigwe GO. Teenage pregnancy: Still an obstetric risk. *Journal of Obstetrics and Gynaecology*. 2001;21(5):478-81.
1572. Ikeda T, Ikeda K, Suda S, Ueno T. Usefulness of the endotoxin activity assay as a biomarker to assess the severity of endotoxemia in critically ill patients. *Innate immunity*. 2014 Nov;20(8):881-7.
1573. Ikpen MA, Eigbefoh J, Eifediyi RA, Isabu PA, Okogbenin S, Okogbo FO, et al. Determination of antioxidant status of pre-eclamptic and normotensive sub-rural Nigerian pregnant women at the Irrua Specialist Teaching Hospital, Irrua, Edo State. *The journal of maternal-fetal & neonatal medicine : the official journal of the European Association of Perinatal Medicine, the Federation of Asia and Oceania Perinatal Societies, the International Society of Perinatal Obstet*. 2012 Oct;25(10):2046-50.
1574. Illah E, Mbaruku G, Masanja H, Kahn K. Causes and risk factors for maternal mortality in rural Tanzania--case of Rufiji Health and Demographic Surveillance Site (HDSS). *African journal of reproductive health*. 2013 Sep;17(3):119-30.
1575. Imarengiaye CO, Edomwonyi NP. Evaluation of 25-gauge Quincke and 24-gauge Gertie Marx needles for spinal anaesthesia for caesarean section. *East Afr Med J*. 2002 Jul;79(7):379-81.
1576. Imbasciati E, Tincani A, Gregorini G, Doria A, Moroni G, Cabiddu G, et al. Pregnancy in women with pre-existing lupus nephritis: predictors of fetal and maternal outcome. *Nephrology, dialysis, transplantation : official publication of the European Dialysis and Transplant Association - European Renal Association*. 2009 Feb;24(2):519-25.
1577. Imbergamo MP, Amato MC, Sciortino G, Gambina M, Accidenti M, Criscimanna A, et al. Use of glargine in pregnant women with type 1 diabetes mellitus: a case-control study. *Clin Ther*. 2008 Aug;30(8):1476-84.
1578. Immink A, Scherjon S, Wolterbeek R, Steyn DW. Seasonal influence on the admittance of pre-eclampsia patients in Tygerberg Hospital. *Acta Obstet Gynecol Scand*. 2008;87(1):36-42.
1579. Impey L, Greenwood C, Sheil O, MacQuillan K, Reynolds M, Redman C. The relation between pre-eclampsia at term and neonatal encephalopathy. *Archives of disease in childhood Fetal and neonatal edition*. 2001 Nov;85(3):F170-2.
1580. Imudia AN, Awonuga AO, Doyle JO, Kaimal AJ, Wright DL, Toth TL, et al. Peak serum estradiol level during controlled ovarian hyperstimulation is associated with increased risk of small for gestational age and preeclampsia in singleton pregnancies after in vitro fertilization. *Fertility and sterility*. 2012 Jun;97(6):1374-9.

1581. Imudia AN, Awonuga AO, Kaimal AJ, Wright DL, Styer AK, Toth TL. Elective cryopreservation of all embryos with subsequent cryothaw embryo transfer in patients at risk for ovarian hyperstimulation syndrome reduces the risk of adverse obstetric outcomes: a preliminary study. *Fertility and sterility*. 2013 Jan;99(1):168-73.
1582. Innes KE, Weitzel L, Laudenslager M. Altered metabolic profiles among older mothers with a history of preeclampsia. *Gynecologic and Obstetric Investigation*. 2005 May;59(4):192-201.
1583. Ioka A, Tsukuma H, Nakamuro K. Lifestyles and pre-eclampsia with special attention to cigarette smoking. *J Epidemiol*. 2003 Mar;13(2):90-5.
1584. Irgens HU, Reisaeter L, Irgens LM, Lie RT. Long term mortality of mothers and fathers after pre-eclampsia: population based cohort study. *Bmj*. 2001 Nov 24;323(7323):1213-7.
1585. Isezuo SA, Ekele BA. Eclampsia and abnormal QTc. *West Afr J Med*. 2004 Apr-Jun;23(2):123-7.
1586. Isezuo SA, Ekele BA. Comparison of metabolic syndrome variables among pregnant women with and without eclampsia. *J Natl Med Assoc*. 2008 Sep;100(9):1059-62.
1587. Ishibashi O, Ohkuchi A, Ali MM, Kurashina R, Luo SS, Ishikawa T, et al. Hydroxysteroid (17-beta) dehydrogenase 1 is dysregulated by miR-210 and miR-518c that are aberrantly expressed in preeclamptic placentas: a novel marker for predicting preeclampsia. *Hypertension*. 2012 Feb;59(2):265-73.
1588. Ishiguro A, Suzuki K, Sekine T, Sudo Y, Kawasaki H, Itoh K, et al. Skin blood flow as a predictor of intraventricular hemorrhage in very-low-birth-weight infants. *Pediatric Research*. 2014 February;75(2):322-7.
1589. Ishikawa N. The relationship between neonatal developmental dysplasia of the hip and maternal hyperthyroidism. *Journal of Pediatric Orthopaedics*. 2008 June;28(4):432-4.
1590. Iskender C, Yasar O, Kaymak O, Yaman ST, Uygur D, Danisman N. Behcet's disease and pregnancy: a retrospective analysis of course of disease and pregnancy outcome. *The journal of obstetrics and gynaecology research*. 2014 Jun;40(6):1598-602.
1591. Islami D, Shoukir Y, Dupont P, Campana A, Bischof P. Is cellular fibronectin a biological marker for pre-eclampsia? *European journal of obstetrics, gynecology, and reproductive biology*. 2001 Jul;97(1):40-5.
1592. Isler CM, Barrilleaux PS, Rinehart BK, Magann EF, Martin JN, Jr. Repeat postpartum magnesium sulfate administration for seizure prophylaxis: is there a patient profile predictive of need for additional therapy? *The journal of maternal-fetal & neonatal medicine : the official journal of the European Association of Perinatal Medicine, the Federation of Asia and Oceania Perinatal Societies, the International Society of Perinatal Obstet*. 2002 Feb;11(2):75-9.
1593. Isler CM, Rinehart BK, Terrone DA, Crews JH, Magann EF, Martin JN, Jr. Septic pelvic thrombophlebitis and preeclampsia are related disorders. *Hypertension in pregnancy*. 2004;23(1):121-7.
1594. Iversen L, Hannaford PC. Toxaemia of pregnancy and risk of mortality in later life: evidence from the Royal College of General Practitioners' Oral Contraception Study. *Hypertension in pregnancy*. 2010 Jan;29(2):180-97.
1595. Iwase M, Yokota M, Kitaichi K, Wang L, Takagi K, Nagasaka T, et al. Cardiac functional and structural alterations induced by endotoxin in rats: importance of platelet-activating factor. *Crit Care Med*. 2001 Mar;29(3):609-17.
1596. Iyoke CA, Ugwu GO, Ezugwu FO, Lawani OL, Onyebuchi AK. Retrospective cohort study of the effects of obesity in early pregnancy on maternal weight gain and obstetric outcomes in an obstetric population in Africa. *International Journal of Women's Health*. 2013 13 Aug;5(1):501-7.
1597. Izci-Balserek B, Pien GW. The relationship and potential mechanistic pathways between sleep disturbances and maternal hyperglycemia topical collection on diabetes and pregnancy. *Current Diabetes Reports*. 2014 February;14(2).
1598. Jaaskelainen E, Toivonen S, Keski-Nisula L, Paattiniemi EL, Helisalmi S, Punnonen K, et al. CTLA-4

- polymorphism 49A-G is associated with placental abruption and preeclampsia in Finnish women. *Clin Chem Lab Med*. 2008;46(2):169-73.
1599. Jackson JB, Musoke P, Fleming T, Guay LA, Bagenda D, Allen M, et al. Intrapartum and neonatal single-dose nevirapine compared with zidovudine for prevention of mother-to-child transmission of HIV-1 in Kampala, Uganda: 18-Month follow-up of the HIVNET 012 randomised trial. *Lancet*. 2003 13 Sep;362(9387):859-68.
1600. Jackson S, Hong C, Wang ET, Alexander C, Gregory KD, Pisarska MD. Pregnancy outcomes in very advanced maternal age pregnancies: The impact of assisted reproductive technology. *Fertility and sterility*. 2015;103(1):76-80.
1601. Jacobs DJ, Vreeburg SA, Dekker GA, Heard AR, Priest KR, Chan A. Risk factors for hypertension during pregnancy in South Australia. *The Australian & New Zealand journal of obstetrics & gynaecology*. 2003 Dec;43(6):421-8.
1602. Jacobsen AF, Skjeldestad FE, Sandset PM. Incidence and risk patterns of venous thromboembolism in pregnancy and puerperium--a register-based case-control study. *Am J Obstet Gynecol*. 2008 Feb;198(2):233.e1-7.
1603. Jacobson GF, Ramos GA, Ching JY, Kirby RS, Ferrara A, Field DR. Comparison of glyburide and insulin for the management of gestational diabetes in a large managed care organization. *Am J Obstet Gynecol*. 2005 Jul;193(1):118-24.
1604. Jacobsson B, Ladfors L, Milsom I. Advanced maternal age and adverse perinatal outcome. *Obstetrics and Gynecology*. 2004 October;104(4):727-33.
1605. Jacquemyn Y, Jochems L, Duiker E, Bosmans JL, Van Hoof V, Van Campenhout C. Long-term renal function after HELLP syndrome. *Gynecol Obstet Invest*. 2004;57(2):117-20.
1606. Jaffe R. Development of early uteroplacental circulation. *Early Pregnancy*. 2001 Jan;5(1):34-5.
1607. Jafrin W, Paul SK, Sultana S, Rabeya S, Hoque MR, Muttalib MA. Serum calcium level among normal pregnant and pre-eclamptic women in a sub urban area of Bangladesh. *Mymensingh Med J*. 2013 Jul;22(3):418-22.
1608. Jahns BG, Stein W, Hilfiker-Kleiner D, Pieske B, Emons G. Peripartum cardiomyopathy-a new treatment option by inhibition of prolactin secretion. *American Journal of Obstetrics and Gynecology*. 2008 October;199(4):e5-e6.
1609. Jahromi BN, Daneshvar A. Pregnancy outcome of parturients below 16 years of age. *Saudi medical journal*. 2005 Sep;26(9):1417-9.
1610. Jahromi BN, Husseini Z. Pregnancy outcome at maternal age 40 and older. *Taiwanese journal of obstetrics & gynecology*. 2008 Sep;47(3):318-21.
1611. Jain AB, Shapiro R, Scantlebury VP, Potdar S, Jordan ML, Flohr J, et al. Pregnancy after kidney and kidney-pancreas transplantation under tacrolimus: a single center's experience. *Transplantation*. 2004 Mar 27;77(6):897-902.
1612. Jain V, Das V, Agarwal A, Pandey A. Asymptomatic bacteriuria & obstetric outcome following treatment in early versus late pregnancy in north Indian women. *The Indian journal of medical research*. 2013 Apr;137(4):753-8.
1613. Jain VD, Moghbeli N, Webb G, Srinivas SK, Elovitz MA, Pare E. Pregnancy in women with congenital heart disease: the impact of a systemic right ventricle. *Congenit Heart Dis*. 2011 Mar-Apr;6(2):147-56.
1614. Jakobsen TR, Clausen FB, Rode L, Dziegiel MH, Tabor A. Identifying mild and severe preeclampsia in asymptomatic pregnant women by levels of cell-free fetal DNA. *Transfusion*. 2013 Sep;53(9):1956-64.
1615. Jameil NA. Maternal serum lead levels and risk of preeclampsia in pregnant women: a cohort study in a maternity hospital, Riyadh, Saudi Arabia. *Int J Clin Exp Pathol*. 2014;7(6):3182-9.
1616. James-Todd T, Janevic T, Brown FM, Savitz DA. Race/ethnicity, educational attainment, and pregnancy complications in New York City women with pre-existing diabetes. *Paediatric and perinatal*

epidemiology. 2014 Mar;28(2):157-65.

1617. Jank A, Kratzsch J, Stepan H. Effect of terminated fetal circulation on maternal angiogenic factors in severe early preeclampsia. *Hypertension in pregnancy*. 2012 May;31(2):201-6.

1618. Jansen PW, Tiemeier H, Jaddoe VWV, Hofman A, Steegers EAP, Verhulst FC, et al. Explaining educational inequalities in preterm birth: The generation r study. *Archives of Disease in Childhood: Fetal and Neonatal Edition*. 2009 January;94(1):F28-F34.

1619. Jansen PW, Tiemeier H, Verhulst FC, Burdorf A, Jaddoe VWV, Hofman A, et al. Employment status and the risk of pregnancy complications: The Generation R Study. *Occupational and Environmental Medicine*. 2010 June;67(6):387-94.

1620. Jantasing S, Tanawattanacharoen S. Perinatal outcomes in severe preeclamptic women between 24-33(+6) weeks' gestation. *Journal of the Medical Association of Thailand = Chotmaihet thangphaet*. 2008 Jan;91(1):25-30.

1621. Janzarik WG, Ehlers E, Ehmann R, Gerds TA, Schork J, Mayer S, et al. Dynamic cerebral autoregulation in pregnancy and the risk of preeclampsia. *Hypertension*. 2014 January;63(1):161-6.

1622. Janzarik WG, Ehmann R, Ehlers E, Allignol A, Mayer S, Gabriel B, et al. Neurovascular coupling in pregnancy and the risk of preeclampsia. *Stroke*. 2014 September;45(9):2792-4.

1623. Jaques AM, Amor DJ, Baker HWG, Healy DL, Ukoumunne OC, Breheny S, et al. Adverse obstetric and perinatal outcomes in subfertile women conceiving without assisted reproductive technologies. *Fertility and sterility*. 2010 December;94(7):2674-9.

1624. Jarvenpaa J, Pakkila M, Savolainen ER, Perheentupa A, Jarvela I, Ryyanen M. Evaluation of factor V Leiden, prothrombin and methylenetetrahydrofolate reductase gene mutations in patients with severe pregnancy complications in northern Finland. *Gynecol Obstet Invest*. 2006;62(1):28-32.

1625. Javed MA, Sial MSH, Lingawi S, Alfi A, Lubbad E. Etiology of Posterior Reversible Encephalopathy Syndrome (PRES). *Pakistan Journal of Medical Sciences*. 2005 April/June;21(2):149-54.

1626. Jayasutha J, Ismail AM, Senthamarai R. Evaluation on efficacy of methyldopa monotherapy and combination therapy with nifedipine in pregnancy-induced hypertension. *Der Pharmacia Lettre*. 2011;3(3):383-7.

1627. Jehan I, McClure EM, Salat S, Rizvi S, Pasha O, Harris H, et al. Stillbirths in an urban community in Pakistan. *Am J Obstet Gynecol*. 2007 Sep;197(3):257.e1-8.

1628. Jelin AC, Kaimal AJ, Kuzniewicz M, Little SE, Cheng YW, Caughey AB. Preterm preeclampsia: 32 to 37 weeks gestation. *The journal of maternal-fetal & neonatal medicine : the official journal of the European Association of Perinatal Medicine, the Federation of Asia and Oceania Perinatal Societies, the International Society of Perinatal Obstet*. 2012 Nov;25(11):2198-201.

1629. Jeng JS, Tang SC, Yip PK. Stroke in women of reproductive age: comparison between stroke related and unrelated to pregnancy. *J Neurol Sci*. 2004 Jun 15;221(1-2):25-9.

1630. Jenkins LD, Powers RW, Cooper M, Gallaher MJ, Markovic N, Ferrell R, et al. Preeclampsia risk and angiotensinogen polymorphisms M235T and AGT -217 in African American and Caucasian women. *Reprod Sci*. 2008 Sep;15(7):696-701.

1631. Jennings-Sanders A. A case study approach to Hyperemesis Gravidarum: home care implications. *Home healthcare nurse*. 2009 Jun;27(6):347-51; quiz 52-53.

1632. Jensen DM, Damm P, Ovesen P, Molsted-Pedersen L, Beck-Nielsen H, Westergaard JG, et al. Microalbuminuria, preeclampsia, and preterm delivery in pregnant women with type 1 diabetes: results from a nationwide Danish study. *Diabetes Care*. 2010 Jan;33(1):90-4.

1633. Jensen DM, Damm P, Sorensen B, Molsted-Pedersen L, Westergaard JG, Korsholm L, et al. Proposed diagnostic thresholds for gestational diabetes mellitus according to a 75-g oral glucose tolerance test. Maternal and perinatal outcomes in 3260 Danish women. *Diabetic Medicine*. 2003;20(1):51-7.

1634. Jensen JD, Wiedmeier SE, Henry E, Silver RM, Christensen RD. Linking maternal platelet counts

- with neonatal platelet counts and outcomes using the data repositories of a multihospital health care system. *American Journal of Perinatology*. 2011;28(8):597-603.
1635. Jeyabalan A, Powers RW, Clifton RG, van Dorsten P, Hauth JC, Klebanoff MA, et al. Effect of smoking on circulating angiogenic factors in high risk pregnancies. *PloS one*. 2010;5(10).
1636. Jharap B, de Boer NK, Stokkers P, Hommes DW, Oldenburg B, Dijkstra G, et al. Intrauterine exposure and pharmacology of conventional thiopurine therapy in pregnant patients with inflammatory bowel disease. *Gut*. 2014 Mar;63(3):451-7.
1637. Jhaveri KD, Aelion A, Wanchoo R. Pre-eclampsia presenting as hyponatremia: an uncommon presentation of pre-eclampsia in a twin pregnancy - a case report and review of the literature. *Clin Nephrol*. 2009 Dec;72(6):492-6.
1638. Jiang N, Liu Q, Liu L, Yang WW, Zeng Y. The effect of calcium channel blockers on prevention of preeclampsia in Pregnant women with chronic hypertension. *Clinical and Experimental Obstetrics and Gynecology*. 2015;42(1):79-81.
1639. Jiang Y, McIntosh JJ, Reese JA, Deford CC, Kremer Hovinga JA, Lammle B, et al. Pregnancy outcomes following recovery from acquired thrombotic thrombocytopenic purpura. *Blood*. 2014 Mar 13;123(11):1674-80.
1640. Jido TA. Eclampsia: maternal and fetal outcome. *Afr Health Sci*. 2012 Jun;12(2):148-52.
1641. Jie Z, Yiling D, Ling Y. Association of assisted reproductive technology with adverse pregnancy outcomes. *Iranian Journal of Reproductive Medicine*. 2015;13(3):169-80.
1642. Jim B, Mehta S, Qipo A, Kim K, Cohen HW, Moore RM, et al. A comparison of podocyturia, albuminuria and nephrinuria in predicting the development of preeclampsia: a prospective study. *PloS one*. 2014;9(7):e101445.
1643. Jivraj S, Anstie B, Cheong YC, Fairlie FM, Laird SM, Li TC. Obstetric and neonatal outcome in women with a history of recurrent miscarriage: A cohort study. *Human reproduction*. 2001;16(1):102-6.
1644. Joensen F, Olsen SF, Holm T, Joensen HD. Perinatal deaths in the Faroe Islands during 1986-95. *Acta Obstet Gynecol Scand*. 2000 Oct;79(10):834-8.
1645. Johnson J, Clifton RG, Roberts JM, Myatt L, Hauth JC, Spong CY, et al. Pregnancy outcomes with weight gain above or below the 2009 Institute of Medicine guidelines. *Obstet Gynecol*. 2013 May;121(5):969-75.
1646. Johnson MP, Brennecke SP, East CE, Dyer TD, Roten LT, Proffitt JM, et al. Genetic dissection of the pre-eclampsia susceptibility locus on chromosome 2q22 reveals shared novel risk factors for cardiovascular disease. *Molecular Human Reproduction*. 2013 July;19(7):423-37.
1647. Johnson MP, Brennecke SP, East CE, Goring HH, Kent JW, Jr., Dyer TD, et al. Genome-wide association scan identifies a risk locus for preeclampsia on 2q14, near the inhibin, beta B gene. *PloS one*. 2012;7(3):e33666.
1648. Johnson MP, Roten LT, Dyer TD, East CE, Forsmo S, Blangero J, et al. The ERAP2 gene is associated with preeclampsia in Australian and Norwegian populations. *Hum Genet*. 2009 Nov;126(5):655-66.
1649. Johnston PC, Powell LA, McCance DR, Pogue K, McMaster C, Gilchrist S, et al. Placental protein tyrosine nitration and MAPK in type 1 diabetic pre-eclampsia: Impact of antioxidant vitamin supplementation. *Journal of Diabetes and its Complications*. 2013 July-August;27(4):322-7.
1650. Johnston R, Fong A, Lovell S, Sobolewski PS, Rad S, Turner A. Demographic and obstetric outcomes of pregnancies conceived by assisted reproductive technology (ART) compared to non-ART pregnancies. *Jornal Brasileiro de Reproducao Assistida*. 2015;19(1):16-20.
1651. Jonard M, Ducloy-Bouthors AS, Boyle E, Aucourt M, Gasan G, Jourdain M, et al. Postpartum acute renal failure: A multicenter study of risk factors in patients admitted to ICU. *Annals of Intensive Care*. 2014;4(1):1-11.
1652. Jonard S, Gauthier-Morgenstern M, Douillard C, Leteurtre E, Nocaudie M, Leroy X, et al. Vitamin



- D deficiency and severe hyperparathyroidism. *Annales d'endocrinologie*. 2002 Dec;63(6 Pt 1):540-6.
1653. Joneborg U, Eloranta S, Johansson AL, Marions L, Weibull CE, Lambe M. Hydatidiform mole and subsequent pregnancy outcome: a population-based cohort study. *Am J Obstet Gynecol*. 2014 Dec;211(6):681.e1-7.
1654. Jones DC, Hiby SE, Moffett A, Trowsdale J, Young NT. Nature of allelic sequence polymorphism at the KIR3DL3 locus. *Immunogenetics*. 2006 Aug;58(8):614-27.
1655. Jony L, Baskett TF. Emergency air transport of obstetric patients. *Journal of obstetrics and gynaecology Canada : JOGC = Journal d'obstetrique et gynecologie du Canada : JOGC*. 2007 May;29(5):406-8.
1656. Jorgensen KT, Harpsoe MC, Jacobsen S, Jess T, Frisch M. Increased risk of rheumatoid arthritis in women with pregnancy complications and poor self-rated health: a study within the Danish National Birth Cohort. *Rheumatology (Oxford)*. 2014 Aug;53(8):1513-9.
1657. Jorgensen KT, Nielsen NM, Pedersen BV, Jacobsen S, Frisch M. Hyperemesis, gestational hypertensive disorders, pregnancy losses and risk of autoimmune diseases in a Danish population-based cohort. *Journal of Autoimmunity*. 2012 May;38(2-3):J120-J8.
1658. Jorgensen KT, Pedersen BV, Jacobsen S, Biggar RJ, Frisch M. National cohort study of reproductive risk factors for rheumatoid arthritis in Denmark: A role for hyperemesis, gestational hypertension and preeclampsia? *Annals of the Rheumatic Diseases*. 2010 February;69(2):358-63.
1659. Jornayvaz FR, Assie G, Bienvenu-Perrard M, Coste J, Guignat L, Bertherat J, et al. Pregnancy does not accelerate corticotroph tumor progression in Nelson's syndrome. *The Journal of clinical endocrinology and metabolism*. 2011 Apr;96(4):E658-62.
1660. Joshi Suyajna D, Veerendrakumar CM. 'Single dose MgSo4 regimen' for Eclampsia - A safe motherhood initiative. *Journal of Clinical and Diagnostic Research*. 2013 01 May;7(5):868-72.
1661. Judd F, Komiti A, Sheehan P, Newman L, Castle D, Everall I. Adverse obstetric and neonatal outcomes in women with severe mental illness: to what extent can they be prevented? *Schizophr Res*. 2014 Aug;157(1-3):305-9.
1662. Kaare M, Seitsonen S, Jarvela I, Meri S, Laivuori H. Complement factor H variant Y402H is not a risk factor for preeclampsia in the Finnish population. *Hypertension in pregnancy*. 2008;27(4):328-36.
1663. Kaartokallio T, Klemetti MM, Timonen A, Uotila J, Heinonen S, Kajantie E, et al. Microsatellite polymorphism in the heme oxygenase-1 promoter is associated with nonsevere and late-onset preeclampsia. *Hypertension*. 2014 July;64(1):172-7.
1664. Kably IM, Chikhaoui N. Spontaneous bilateral perirenal hematomas in two patients with eclampsia. *J Nephrol*. 2003 Mar-Apr;16(2):267-71.
1665. Kadhel P, Toto T, Janky E. Vaginal cesarean section: heir to, but not legacy of Dührssen's incision. *Archives of Gynecology and Obstetrics*. 2015;291(5):1063-7.
1666. Kafkasli A, Turkcuoglu I, Turhan U. Maternal, fetal and perinatal characteristics of preeclampsia cases with and without abnormalities in uterine artery Doppler indexes. *Journal of Maternal-Fetal and Neonatal Medicine*. 2013 June;26(9):936-40.
1667. Kagan KO, Hoopmann M, Abele H, Alkier R, Luthgens K. First-trimester combined screening for trisomy 21 with different combinations of placental growth factor, free beta-human chorionic gonadotropin and pregnancy-associated plasma protein-A. *Ultrasound in obstetrics & gynecology : the official journal of the International Society of Ultrasound in Obstetrics and Gynecology*. 2012 Nov;40(5):530-5.
1668. Kahaleh M, Hartwell GD, Arseneau KO, Pajewski TN, Mullick T, Isin G, et al. Safety and efficacy of ERCP in pregnancy. *Gastrointestinal endoscopy*. 2004 Aug;60(2):287-92.
1669. Kahn BF, Davies JK, Lynch AM, Reynolds RM, Barbour LA. Predictors of glyburide failure in the treatment of gestational diabetes. *Obstet Gynecol*. 2006 Jun;107(6):1303-9.
1670. Kahn SR, Almeida ND, McNamara H, Koren G, Genest J, Jr., Dahhou M, et al. Smoking in

preeclamptic women is associated with higher birthweight for gestational age and lower soluble fms-like tyrosine kinase-1 levels: a nested case control study. *BMC pregnancy and childbirth*. 2011;11:91.

1671. Kahn SR, Platt R, McNamara H, Rozen R, Chen MF, Genest J, Jr., et al. Inherited thrombophilia and preeclampsia within a multicenter cohort: the Montreal Preeclampsia Study. *Am J Obstet Gynecol*. 2009 Feb;200(2):151.e1-9; discussion e1-5.

1672. Kainz A, Harabacz I, Cowlrick IS, Gadgil SD, Hagiwara D. Review of the course and outcome of 100 pregnancies in 84 women treated with tacrolimus. *Transplantation*. 2000 Dec 27;70(12):1718-21.

1673. Kaiser PS, Kirby RS. Obesity as a risk factor for cesarean in a low-risk population. *Obstet Gynecol*. 2001 Jan;97(1):39-43.

1674. Kaitu'u-Lino TJ, Palmer K, Tuohey L, Ye L, Tong S. MMP-15 is upregulated in preeclampsia, but does not cleave endoglin to produce soluble endoglin. *PloS one*. 2012;7(6):e39864.

1675. Kajantie E, Eriksson JG, Osmond C, Thornburg K, Barker DJ. Pre-eclampsia is associated with increased risk of stroke in the adult offspring: the Helsinki birth cohort study. *Stroke*. 2009 Apr;40(4):1176-80.

1676. Kakkar T, Singh V, Razdan R, Digra SK, Gupta A, Kakkar M. Placental laterality as a predictor for development of preeclampsia. *Journal of Obstetrics and Gynecology of India*. 2013 March;63(1):22-5.

1677. Kalinderis M, Papanikolaou A, Kalinderi K, Ioannidou E, Giannoulis C, Karagiannis V, et al. Elevated serum levels of interleukin-6, interleukin-1beta and human chorionic gonadotropin in pre-eclampsia. *American journal of reproductive immunology (New York, NY : 1989)*. 2011 Dec;66(6):468-75.

1678. Kalk JJ, Huisjes AJ, de Groot CJ, van Beek E, van Pampus MG, Spaanderman ME, et al. Recurrence rate of pre-eclampsia in women with thrombophilia influenced by low-molecular-weight heparin treatment? *The Netherlands journal of medicine*. 2004 Mar;62(3):83-7.

1679. Kallen B, Mottet I. Delivery outcome after the use of meclizine in early pregnancy. *Eur J Epidemiol*. 2003;18(7):665-9.

1680. Kallen B, Otterblad Olausson P. Use of anti-asthmatic drugs during pregnancy. 1. Maternal characteristics, pregnancy and delivery complications. *European Journal of Clinical Pharmacology*. 2007 April;63(4):363-73.

1681. Kalousova M, Jachymova M, Muravska A, Kubena AA, Dusilova-Sulkova S, Tesar V, et al. Cys327Cys polymorphism of the PAPP-A gene (pregnancy associated plasma protein A) is related to mortality of long term hemodialysis patients. *Clinical Biochemistry*. 2014 May;47(7-8):578-83.

1682. Kalumba VM, Moodley J, Naidoo TD. Is the prevalence of pre-eclampsia affected by HIV/AIDS? A retrospective case-control study. *Cardiovascular journal of Africa*. 2013 Mar;24(2):24-7.

1683. Kamal EM, Behery MME, Sayed GAE, Abdulatif HK. RIFLE classification and mortality in obstetric patients admitted to the intensive care unit with acute kidney injury: A 3-year prospective study. *Reproductive Sciences*. 2014 11 Oct;21(10):1281-7.

1684. Kamat R, Jain V, Bahl A. Serial estimation of flow mediated dilatation in women at risk of hypertensive disorders of pregnancy. *Int J Cardiol*. 2011 May 19;149(1):17-22.

1685. Kamimura K, Abe H, Kawai H, Kamimura H, Kobayashi Y, Nomoto M, et al. Advances in understanding and treating liver diseases during pregnancy: A review. *World Journal of Gastroenterology*. 2015 07 May;21(17):5183-90.

1686. Kamiya CA, Kitakaze M, Ishibashi-Ueda H, Nakatani S, Murohara T, Tomoike H, et al. Different characteristics of peripartum cardiomyopathy between patients complicated with and without hypertensive disorders: Results from the Japanese nationwide survey of peripartum cardiomyopathy. *Circulation Journal*. 2011 August;75(8):1975-81.

1687. Kandil M, Sayyed T, Emarh M, Ellakwa H, Masood A. Medication errors in the obstetrics emergency ward in a low resource setting. *Journal of Maternal-Fetal and Neonatal Medicine*. 2012 August;25(8):1379-82.

1688. Kandimalla BH, Sirjusingh A, Nayak BS, Maiya SS. Early antenatal serum lipid levels and the risk of pre-eclampsia in Trinidad and Tobago. *Arch Physiol Biochem*. 2011 Oct;117(4):215-21.
1689. Kaneshiro Y, Oda Y, Iwakiri K, Masada T, Iwaki H, Hirota Y, et al. Low hepatic cytochrome P450 3A activity is a risk for corticosteroid-induced osteonecrosis. *Clinical Pharmacology and Therapeutics*. 2006 October;80(4):396-402.
1690. Kang EJ, Woo OH, Park KH, Woo SU, Yang DS, Kim AR, et al. The relationship between preeclampsia, pregnancy-induced hypertension and maternal risk of breast cancer: A meta-analysis. *Acta Oncologica*. 2013;52(8):1643-8.
1691. Kang JH, Farina A, Park JH, Kim SH, Kim JY, Rizzo N, et al. Down syndrome biochemical markers and screening for preeclampsia at first and second trimester: correlation with the week of onset and the severity. *Prenatal diagnosis*. 2008 Aug;28(8):704-9.
1692. Kao DP, Hsieh E, Lindenfeld J. Characteristics, adverse events, and racial differences among delivering mothers with peripartum cardiomyopathy. *JACC Heart failure*. 2013 Oct;1(5):409-16.
1693. Kapadia VS, Chalak LF, Dupont TL, Rollins NK, Brion LP, Wyckoff MH. Perinatal asphyxia with hyperoxemia within the first hour of life is associated with moderate to severe hypoxic-ischemic encephalopathy. *Journal of Pediatrics*. 2013 October;163(4):949-54.
1694. Karabul N, Berndt J, Kornblum C, Kley RA, Wenninger S, Tiling N, et al. Pregnancy and delivery in women with pompe disease. *Molecular Genetics and Metabolism*. 2014 June;112(2):148-53.
1695. Karagiannakis DS, Vlachogiannakos J, Anastasiadis G, Vafiadis-Zouboulis I, Ladas SD. Frequency and severity of cirrhotic cardiomyopathy and its possible relationship with bacterial endotoxemia. *Dig Dis Sci*. 2013 Oct;58(10):3029-36.
1696. Karakosta P, Alegakis D, Georgiou V, Roumeliotaki T, Fthenou E, Vassilaki M, et al. Thyroid dysfunction and autoantibodies in early pregnancy are associated with increased risk of gestational diabetes and adverse birth outcomes. *The Journal of clinical endocrinology and metabolism*. 2012 Dec;97(12):4464-72.
1697. Karatas G, Dede FS, Tarcan A, Altinbas S, Kandemir O. Pregnancy outcomes in women aged 40 years and older. *Journal of the Turkish German Gynecology Association*. 2005 June;6(2):114-7.
1698. Kasawara KT, Nascimento SLD, Costa ML, Surita FG, J.L.P ES. Exercise and physical activity in the prevention of pre-eclampsia: Systematic review. *Acta Obstetrica et Gynecologica Scandinavica*. 2012 October;91(10):1147-57.
1699. Kase BA, Cormier CM, Costantine MM, Hutchinson M, Ramin SM, Saade GR, et al. Excessive gestational weight gain in women with gestational and pregestational diabetes. *Am J Perinatol*. 2011 Dec;28(10):761-6.
1700. Kashanian M, Aghbali F, Mahali N. Evaluation of the diagnostic value of the first-trimester maternal serum high-sensitivity C-reactive protein level for prediction of pre-eclampsia. *The journal of obstetrics and gynaecology research*. 2013 Dec;39(12):1549-54.
1701. Kashanian M, Akbarian AR, Baradaran H, Shabandoust SH. Pregnancy outcome following a previous spontaneous abortion (miscarriage). *Gynecol Obstet Invest*. 2006;61(3):167-70.
1702. Kashanian M, Baradaran HR, Bahasadri S, Alimohammadi R. Risk factors for pre-eclampsia: a study in Tehran, Iran. *Arch Iran Med*. 2011 Nov;14(6):412-5.
1703. Kashanizadeh N, Nematy E, Sharifi-Bonab M, Moghani-Lankarani M, Ghazizadeh S, Einollahi B, et al. Impact of pregnancy on the outcome of kidney transplantation. *Transplant Proc*. 2007 May;39(4):1136-8.
1704. Kashyap S, Claman P. Polycystic ovary disease and the risk of pregnancy-induced hypertension. *The Journal of reproductive medicine*. 2000 Dec;45(12):991-4.
1705. Kassem GA. Scientific research in obstetrics and gynecology: Changes in the trends over three decades. *International Journal of Women's Health*. 2015;7(16).
1706. Kastelan S, Tomic M, Pavan J, Oreskovic S. Maternal immune system adaptation to pregnancy--a

- potential influence on the course of diabetic retinopathy. *Reproductive biology and endocrinology : RB&E*. 2010;8:124.
1707. Kastelan S, Tomic M, Pavan J, Oreskovic S. Maternal immune system adaptation to pregnancy - a potential influence on the course of diabetic retinopathy. *Reproductive Biology and Endocrinology*. 2010 Oct;8(124).
1708. Katayama Y, Minami H, Enomoto M, Takano T, Hayashi S, Lee YK. Antenatal magnesium sulfate and the postnatal response of the ductus arteriosus to indomethacin in extremely preterm neonates. *Journal of Perinatology*. 2011 January;31(1):21-4.
1709. Katon WJ, Russo JE, Melville JL, Katon JG, Gavin AR. Depression in pregnancy is associated with preexisting but not pregnancy-induced hypertension. *Gen Hosp Psychiatry*. 2012 Jan-Feb;34(1):9-16.
1710. Katoonizadeh A, Decaestecker J, Wilmer A, Aerts R, Verslype C, Vansteenbergen W, et al. MELD score to predict outcome in adult patients with non-acetaminophen-induced acute liver failure. *Liver International*. 2007 April;27(3):329-34.
1711. Katz A, Sergienko R, Dior U, Wiznitzer A, Kaplan DM, Sheiner E. Bell's palsy during pregnancy: is it associated with adverse perinatal outcome? *Laryngoscope*. 2011 Jul;121(7):1395-8.
1712. Katz O, Paz-Tal O, Lazer T, Aricha-Tamir B, Mazor M, Wiznitzer A, et al. Severe pre-eclampsia is associated with abnormal trace elements concentrations in maternal and fetal blood. *Journal of Maternal-Fetal and Neonatal Medicine*. 2012 July;25(7):1127-30.
1713. Katzenell S, Shomer E, Zipori Y, Zylberfisz A, Brenner B, Aharon A. Characterization of negatively charged phospholipids and cell origin of microparticles in women with gestational vascular complications. *Thrombosis Research*. 2012 September;130(3):479-84.
1714. Kaufmann I, Rusterholz C, Hosli I, Hahn S, Lapaire O. Can detection of late-onset PE at triage by sflt-1 or PIGF be improved by the use of additional biomarkers? *Prenatal diagnosis*. 2012 December;32(13):1288-94.
1715. Kaul A, Sharma RK, Tripathi R, Suresh KJ, Bhatt S, Prasad N. Spectrum of community-acquired acute kidney injury in India: a retrospective study. *Saudi J Kidney Dis Transpl*. 2012 May;23(3):619-28.
1716. Kaul B, Vallejo M, Ramanathan S, Mandell G. Epidural labor analgesia and neonatal sepsis evaluation rate: a quality improvement study. *Anesth Analg*. 2001 Oct;93(4):986-90.
1717. Kaul P, Savu A, Nerenberg KA, Donovan LE, Chik CL, Ryan EA, et al. Impact of gestational diabetes mellitus and high maternal weight on the development of diabetes, hypertension and cardiovascular disease: A population-level analysis. *Diabetic Medicine*. 2015 01 Feb;32(2):164-73.
1718. Kaya B, Nayki U, Nayki C, Ulug P, Oner G, Gultekin E, et al. Proliferation of trophoblasts and Ki67 expression in preeclampsia. *Archives of Gynecology and Obstetrics*. 2015;291(5):1041-6.
1719. Kayatas S, Erdogdu E, Cakar E, Yilmazer V, Arinkan SA, Dayicioglu VE. Comparison of 24-hour urinary protein and protein-to-creatinine ratio in women with preeclampsia. *European journal of obstetrics, gynecology, and reproductive biology*. 2013 Oct;170(2):368-71.
1720. Kayem G, Kurinczuk J, Lewis G, Golightly S, Brocklehurst P, Knight M. Risk factors for progression from severe maternal morbidity to death: a national cohort study. *PloS one*. 2011;6(12):e29077.
1721. Kayem G, Kurinczuk JJ, Spark P, Brocklehurst P, Knight M. Maternal and obstetric factors associated with delayed postpartum eclampsia: a national study population. *Acta Obstet Gynecol Scand*. 2011 Sep;90(9):1017-23.
1722. Kaze FF, Njukeng FA, Kengne AP, Ashuntantang G, Mbu R, Halle MP, et al. Post-partum trend in blood pressure levels, renal function and proteinuria in women with severe preeclampsia and eclampsia in Sub-Saharan Africa: a 6-months cohort study. *BMC pregnancy and childbirth*. 2014;14:134.
1723. Kazemier BM, Ravelli ACJ, De Groot CJM, Mol BWJ. Optimal timing of near-term delivery in different ethnicities: A national cohort study. *BJOG: An International Journal of Obstetrics and Gynaecology*. 2014 September;121(10):1274-82.
1724. Kazerooni T, Hamze-Nejadi S. Calcium to creatinine ratio in a spot sample of urine for early

prediction of pre-eclampsia. *International journal of gynaecology and obstetrics: the official organ of the International Federation of Gynaecology and Obstetrics*. 2003 Mar;80(3):279-83.

1725. Kazerooni T, Khosroparahanh S. Second trimester cardiac output and its predictive value for preeclampsia. *Saudi medical journal*. 2006 October;27(10):1526-9.

1726. Kazerooni T, Taallom M, Ghaderi A. Helicobacter pylori seropositivity among patients with hyperemesis gravidarum. *Iranian Journal of Medical Sciences*. 2002 June;27(2):67-9.

1727. Keepanasseril A, Bagga R, Gainer S, Saha SC, Dhaliwal LK, Lal A, et al. Renal hematoma: an unusual cause of acute abdomen and fetal demise in severe pre-eclampsia. *Indian J Med Sci*. 2011 Oct;65(10):456-9.

1728. Keiser SD, Owens MY, Parrish MR, Cushman JL, Bufkin L, May WL, et al. HELLP syndrome with and without eclampsia. *Am J Perinatol*. 2011 Mar;28(3):187-94.

1729. Keitel E, Bruno RM, Duarte M, Santos AF, Bittar AE, Bianco PD, et al. Pregnancy outcome after renal transplantation. *Transplant Proc*. 2004 May;36(4):870-1.

1730. Keizer JL, Zwart JJ, Meerman RH, Harinck BI, Feuth HD, van Roosmalen J. Obstetric intensive care admissions: a 12-year review in a tertiary care centre. *European journal of obstetrics, gynecology, and reproductive biology*. 2006 Sep-Oct;128(1-2):152-6.

1731. Kelly VM, Nelson LM, Chakravarty EF. Obstetric outcomes in women with multiple sclerosis and epilepsy. *Neurology*. 2009 Dec 1;73(22):1831-6.

1732. Kenny LC, Black MA, Poston L, Taylor R, Myers JE, Baker PN, et al. Early pregnancy prediction of preeclampsia in nulliparous women, combining clinical risk and biomarkers: the Screening for Pregnancy Endpoints (SCOPE) international cohort study. *Hypertension*. 2014 Sep;64(3):644-52.

1733. Kenny LC, Broadhurst DI, Dunn W, Brown M, North RA, McCowan L, et al. Robust early pregnancy prediction of later preeclampsia using metabolomic biomarkers. *Hypertension*. 2010 Oct;56(4):741-9.

1734. Kerlin BA, Yan SB, Isermann BH, Brandt JT, Sood R, Basson BR, et al. Survival advantage associated with heterozygous factor V Leiden mutation in patients with severe sepsis and in mouse endotoxemia. *Blood*. 2003 Nov 1;102(9):3085-92.

1735. Kerrigan AM, Kingdon C. Maternal obesity and pregnancy: a retrospective study. *Midwifery*. 2010 Feb;26(1):138-46.

1736. Keshavarz M, Cheung NW, Babae GR, Moghadam HK, Ajami ME, Shariati M. Gestational diabetes in Iran: Incidence, risk factors and pregnancy outcomes. *Diabetes Research and Clinical Practice*. 2005 September;69(3):279-86.

1737. Keskin HL, Uyanik G, Sivaslioglu AA, Celen E, Avsar AF. Postpartum posterior reversible encephalopathy syndrome (PRES) in a patient with severe preeclampsia: Case report. *Turkiye Klinikleri Jinekoloji Obstetrik*. 2014;24(1):62-6.

1738. Keski-Nisula L, Heinonen S, Remes S, Pekkanen J. Pre-eclampsia, placental abruption and increased risk of atopic sensitization in male adolescent offspring. *American Journal of Reproductive Immunology*. 2009 November;62(5):293-300.

1739. Keskinoglu P, Bilgic N, Picakciefe M, Giray H, Karakus N, Gunay T. Perinatal Outcomes and Risk Factors of Turkish Adolescent Mothers. *Journal of Pediatric and Adolescent Gynecology*. 2007 February;20(1):19-24.

1740. Kessler J, Moster D, Albrechtsen S. Intrapartum monitoring of high-risk deliveries with ST analysis of the fetal electrocardiogram: An observational study of 6010 deliveries. *Acta Obstetrica et Gynecologica Scandinavica*. 2013 January;92(1):75-84.

1741. Kessous R, Danor D, Weintraub YA, Wiznitzer A, Sergienko R, Ohel I, et al. Risk factors for relaparotomy after cesarean section. *The journal of maternal-fetal & neonatal medicine : the official journal of the European Association of Perinatal Medicine, the Federation of Asia and Oceania Perinatal Societies, the International Society of Perinatal Obstet*. 2012 Nov;25(11):2167-70.

1742. Kessous R, Shoham-Vardi I, Pariente G, Holcberg G, Sheiner E. An association between preterm delivery and long-term maternal cardiovascular morbidity. *Am J Obstet Gynecol*. 2013 Oct;209(4):368.e1-8.
1743. Kessous R, Shoham-Vardi I, Pariente G, Sergienko R, Holcberg G, Sheiner E. Recurrent pregnancy loss: a risk factor for long-term maternal atherosclerotic morbidity? *Am J Obstet Gynecol*. 2014 Oct;211(4):414.e1-11.
1744. Kessous R, Shoham-Vardi I, Pariente G, Sergienko R, Sheiner E. Long-term maternal atherosclerotic morbidity in women with pre-eclampsia. *Heart*. 2015 Mar;101(6):442-6.
1745. Kessous R, Shoham-Vardi I, Pariente G, Sherf M, Sheiner E. An association between gestational diabetes mellitus and long-term maternal cardiovascular morbidity. *Heart*. 2013 Aug;99(15):1118-21.
1746. Kestenbaum B, Seliger SL, Easterling TR, Gillen DL, Critchlow CW, Stehman-Breen CO, et al. Cardiovascular and thromboembolic events following hypertensive pregnancy. *American journal of kidney diseases : the official journal of the National Kidney Foundation*. 2003 Nov;42(5):982-9.
1747. Kevane B, Donnelly J, D'Alton M, Cooley S, Preston RJ, Ni Ainle F. Risk factors for pregnancy-associated venous thromboembolism: a review. *J Perinat Med*. 2014 Jul;42(4):417-25.
1748. Keyes LE, Armaza JF, Niermeyer S, Vargas E, Young DA, Moore LG. Intrauterine growth restriction, preeclampsia, and intrauterine mortality at high altitude in Bolivia. *Pediatric Research*. 2003 01 Jul;54(1):20-5.
1749. Khalafallah AA, Ibraheem ARO, Teo QY, Albarzan AM, Parameswaran R, Hooper E, et al. Review of management and outcomes in women with thrombophilia risk during pregnancy at a single institution. *ISRN Obstetrics and Gynecology*. 2014;2014(1).
1750. Khalessi N, Farahani Z, Shariat M, Rezaeizadeh G. Risk factors of intracranial hemorrhage in premature neonates. *Acta Medica Iranica*. 2014;52(9):687-9.
1751. Khalid AS, Marchocki Z, Hayes K, Lutomski JE, Joyce C, Stapleton M, et al. Establishing trimester-specific maternal thyroid function reference intervals. *Annals of Clinical Biochemistry*. 2014 March;51(2):277-83.
1752. Khalil A, Akolekar R, Syngelaki A, Elkhoul M, Nicolaides KH. Maternal hemodynamics at 11-13 weeks' gestation and risk of pre-eclampsia. *Ultrasound Obstet Gynecol*. 2012 Jul;40(1):28-34.
1753. Khalil A, Akolekar R, Syngelaki A, Perez Penco JM, Nicolaides KH. Effect of chorionic villus sampling on uterine artery doppler. *Fetal Diagnosis and Therapy*. 2010 July;28(1):9-13.
1754. Khalil A, Garcia-Mandujano R, Maiz N, Elkhoul M, Nicolaides KH. Longitudinal changes in uterine artery Doppler and blood pressure and risk of pre-eclampsia. *Ultrasound Obstet Gynecol*. 2014 May;43(5):541-7.
1755. Khalil A, Rezende J, Akolekar R, Syngelaki A, Nicolaides KH. Maternal racial origin and adverse pregnancy outcome: a cohort study. *Ultrasound Obstet Gynecol*. 2013 Mar;41(3):278-85.
1756. Khalil A, Sodre D, Syngelaki A, Akolekar R, Nicolaides KH. Maternal hemodynamics at 11-13 weeks of gestation in pregnancies delivering small for gestational age neonates. *Fetal Diagn Ther*. 2012;32(4):231-8.
1757. Khalil A, Syngelaki A, Maiz N, Zinevich Y, Nicolaides KH. Maternal age and adverse pregnancy outcome: a cohort study. *Ultrasound Obstet Gynecol*. 2013 Dec;42(6):634-43.
1758. Khalil AA, Cooper DJ, Harrington KF. Pulse wave analysis: a preliminary study of a novel technique for the prediction of pre-eclampsia. *Bjog*. 2009 Jan;116(2):268-76; discussion 76-7.
1759. Khalil MM, Alzahra E. Fetal gender and pregnancy outcomes in Libya: a retrospective study. *Libyan J Med*. 2013;8.
1760. Khan F, Belch JJ, MacLeod M, Mires G. Changes in endothelial function precede the clinical disease in women in whom preeclampsia develops. *Hypertension*. 2005 Nov;46(5):1123-8.
1761. Khan IA, Kamineni V, Poornima S, Jahan P, Hasan Q, Rao P. Tumor necrosis factor alpha promoter polymorphism studies in pregnant women. *Journal of Reproductive Health and Medicine*.

2015;1(1):18-22.

1762. Khan SLA. Acute renal failure in pregnancy: One year observational study at Nephrology Department Sandeman Provincial Hospital Quetta. *Pakistan Journal of Medical and Health Sciences*. 2010 July-September;4(3):188-91.

1763. Khanam NN, Khatun S, Chowdhury TA, Barua A. Platelet count alone is a suitable screening test for early detection of coagulation disorders in preeclampsia and eclampsia. *Journal of Medical Teachers Federation*. 2000;5(1):10-5.

1764. Khandelwal M, Kumanova M, Gaughan JP, Reece EA. Role of diltiazem in pregnant women with chronic renal disease. *The journal of maternal-fetal & neonatal medicine : the official journal of the European Association of Perinatal Medicine, the Federation of Asia and Oceania Perinatal Societies, the International Society of Perinatal Obstet*. 2002 Dec;12(6):408-12.

1765. Kharbanda EO, Vazquez-Benitez G, Lipkind H, Naleway A, Lee G, Nordin JD. Inactivated influenza vaccine during pregnancy and risks for adverse obstetric events. *Obstet Gynecol*. 2013 Sep;122(3):659-67.

1766. Khashan AS, Quigley EM, McNamee R, McCarthy FP, Shanahan F, Kenny LC. Increased risk of miscarriage and ectopic pregnancy among women with irritable bowel syndrome. *Clinical gastroenterology and hepatology : the official clinical practice journal of the American Gastroenterological Association*. 2012 Aug;10(8):902-9.

1767. Khaskheli MN, Baloch S, Sheeba A. Risk factors and complications of puerperal sepsis at a tertiary healthcare centre. *Pakistan Journal of Medical Sciences*. 2013;29(4).

1768. Khattab S, Mohsen IA, Aboul Foutouh I, Ashmawi HS, Mohsen MN, van Wely M, et al. Can metformin reduce the incidence of gestational diabetes mellitus in pregnant women with polycystic ovary syndrome? Prospective cohort study. *Gynecological endocrinology : the official journal of the International Society of Gynecological Endocrinology*. 2011 Oct;27(10):789-93.

1769. Khatun K, Ara R, Aleem NT, Khan S, Husein S, Alam S, et al. Maternal mortality in obstetrics and gynaecology in a tertiary care hospital. *Mymensingh Med J*. 2015 Jan;24(1):103-7.

1770. Khaw A, Kametas NA, Turan OM, Bamfo JEAK, Nicolaides KH. Maternal cardiac function and uterine artery Doppler at 11-14 weeks in the prediction of pre-eclampsia in nulliparous women. *BJOG: An International Journal of Obstetrics and Gynaecology*. 2008 February;115(3):369-76.

1771. Kho EM, McCowan LM, North RA, Roberts CT, Chan E, Black MA, et al. Duration of sexual relationship and its effect on preeclampsia and small for gestational age perinatal outcome. *J Reprod Immunol*. 2009 Oct;82(1):66-73.

1772. Khreisat WH, Habahbeh Z. Risk factors of birth asphyxia: A study at Prince Ali Ben Al-Hussein Hospital, Jordan. *Pakistan Journal of Medical Sciences*. 2005 January/March;21(1):30-4.

1773. Khumanthem PD, Chanam MS, Samjetshabam RD. Maternal mortality and its causes in a tertiary center. *Journal of Obstetrics and Gynecology of India*. 2012 April;62(2):168-71.

1774. Kidner MC, Flanders-Stepans MB. A model for the HELLP syndrome: the maternal experience. *J Obstet Gynecol Neonatal Nurs*. 2004 Jan-Feb;33(1):44-53.

1775. Kiel DW, Dodson EA, Artal R, Boehmer TK, Leet TL. Gestational weight gain and pregnancy outcomes in obese women: how much is enough? *Obstet Gynecol*. 2007 Oct;110(4):752-8.

1776. Kihara M, Usui H, Tanaka H, Inoue H, Matsui H, Shozu M. Complicating preeclampsia as a predictor of poor survival of the fetus in complete hydatidiform mole coexistent with twin fetus. *The Journal of reproductive medicine*. 2012 Jul-Aug;57(7-8):325-8.

1777. Kilicdag EB, Ay G, Celik A, Ustundag B, Ozercan I, Simsek M. Oxidant-antioxidant system changes relative to placental-umbilical pathology in patients with preeclampsia. *Hypertension in pregnancy*. 2005;24(2):147-57.

1778. Kim DD, Page SM, McKenna DS, Kim CM. Neonatal group B streptococcus sepsis after negative screen in a patient taking oral antibiotics. *Obstet Gynecol*. 2005 May;105(5 Pt 2):1259-61.

1779. Kim DR, Sockol LE, Sammel MD, Kelly C, Moseley M, Epperson CN. Elevated risk of adverse obstetric outcomes in pregnant women with depression. *Arch Womens Ment Health*. 2013 Dec;16(6):475-82.
1780. Kim HS, Chang KH, Yang JI, Yang SC, Lee HJ, Ryu HS. Clinical outcomes of pregnancy with one elevated glucose tolerance test value. *International Journal of Gynecology and Obstetrics*. 2002;78(2):131-8.
1781. Kim LH, Cheng YW, Delaney S, Jelin AC, Caughey AB. Is preeclampsia associated with an increased risk of cesarean delivery if labor is induced? *The journal of maternal-fetal & neonatal medicine : the official journal of the European Association of Perinatal Medicine, the Federation of Asia and Oceania Perinatal Societies, the International Society of Perinatal Obstet*. 2010 May;23(5):383-8.
1782. Kim MW, Ahn KH, Ryu KJ, Hong SC, Lee JS, Nava-Ocampo AA, et al. Preventive effects of folic acid supplementation on adverse maternal and fetal outcomes. *PloS one*. 2014 19 May;9(5).
1783. Kim SY, Park SY, Lim JH, Lee BY, Yang JH, Ryu HM. Hypoxia inducible factor-1alpha gene polymorphisms in Korean patients with pre-eclampsia. *J Endocrinol Invest*. 2012 Jul;35(7):670-5.
1784. Kim YJ, Park BH, Park H, Jung SC, Pang MG, Ryu HM, et al. No association of the genetic polymorphisms of endothelial nitric oxide synthase, dimethylarginine dimethylaminohydrolase, and vascular endothelial growth factor with preeclampsia in Korean populations. *Twin Res Hum Genet*. 2008 Feb;11(1):77-83.
1785. Kim YJ, Park HS, Lee HY, Ha EH, Suh SH, Oh SK, et al. Reduced L-arginine level and decreased placental eNOS activity in preeclampsia. *Placenta*. 2006 Apr-May;27(4-5):438-44.
1786. Kinzler WL, Smulian JC, Ananth CV, Vintzileos AM. Noninvasive ultrasound assessment of maternal vascular reactivity during pregnancy: a longitudinal study. *Obstet Gynecol*. 2004 Aug;104(2):362-6.
1787. Kirbas O, Biberoglu EH, Kirbas A, Daglar HK, Kurmus O, Uygur D, et al. P-wave duration changes and dispersion in preeclampsia. *European Journal of Obstetrics Gynecology and Reproductive Biology*. 2014 01 Dec;183:141-5.
1788. Kirk E, Papageorgiou AT, Condous G, Bottomley C, Bourne T. Hyperemesis gravidarum: Is an ultrasound scan necessary? *Human reproduction*. 2006 September;21(9):2440-2.
1789. Kistner A, Vanpee M, Hall K. Leptin may enhance hepatic insulin sensitivity in children and women born small for gestational age. *Endocrine Connections*. 2013;2(1):38-49.
1790. Kittur ND, McMullen KM, Russo AJ, Ruhl L, Kay HH, Warren DK. Long-term effect of infection prevention practices and case mix on cesarean surgical site infections. *Obstet Gynecol*. 2012 Aug;120(2 Pt 1):246-51.
1791. Kivinen K, Peterson H, Hiltunen L, Laivuori H, Heino S, Tiala I, et al. Evaluation of STOX1 as a preeclampsia candidate gene in a population-wide sample. *European journal of human genetics : EJHG*. 2007 Apr;15(4):494-7.
1792. Kjaer MM, Lauenborg J, Breum BM, Nilas L. The risk of adverse pregnancy outcome after bariatric surgery: a nationwide register-based matched cohort study. *Am J Obstet Gynecol*. 2013 Jun;208(6):464.e1-5.
1793. Kjaer MM, Nilas L. Timing of pregnancy after gastric bypass-a national register-based cohort study. *Obes Surg*. 2013 Aug;23(8):1281-5.
1794. Kjellberg U, van Rooijen M, Bremme K, Hellgren M. Factor V Leiden mutation and pregnancy-related complications. *Am J Obstet Gynecol*. 2010 Nov;203(5):469.e1-8.
1795. Kjos SL, Berkowitz K, Xiang A. Independent predictors of cesarean delivery in women with diabetes. *The journal of maternal-fetal & neonatal medicine : the official journal of the European Association of Perinatal Medicine, the Federation of Asia and Oceania Perinatal Societies, the International Society of Perinatal Obstet*. 2004 Jan;15(1):61-7.
1796. Kjos SL, Berkowitz KM, Kung B. Prospective delivery of reliably dated term infants of diabetic



mothers without determination of fetal lung maturity: comparison to historical control. *The journal of maternal-fetal & neonatal medicine : the official journal of the European Association of Perinatal Medicine, the Federation of Asia and Oceania Perinatal Societies, the International Society of Perinatal Obstet.* 2002 Dec;12(6):433-7.

1797. Klatsky PC, Delaney SS, Caughey AB, Tran ND, Schattman GL, Rosenwaks Z. The role of embryonic origin in preeclampsia: A comparison of autologous in vitro fertilization and ovum donor pregnancies. *Obstetrics and Gynecology.* 2010 December;116(6):1387-92.

1798. Kleijer ME, Dekker GA, Heard AR. Risk factors for intrauterine growth restriction in a socio-economically disadvantaged region. *The journal of maternal-fetal & neonatal medicine : the official journal of the European Association of Perinatal Medicine, the Federation of Asia and Oceania Perinatal Societies, the International Society of Perinatal Obstet.* 2005 Jul;18(1):23-30.

1799. Klein A. Peripheral nerve disease in pregnancy. *Clinical Obstetrics and Gynecology.* 2013 June;56(2):382-8.

1800. Klein DJ, Briet F, Nisenbaum R, Romaschin AD, Mazer CD. Endotoxemia related to cardiopulmonary bypass is associated with increased risk of infection after cardiac surgery: a prospective observational study. *Critical care (London, England).* 2011;15(1):R69.

1801. Klemetti MM, Teramo K, Nuutila M, Tikkanen M, Hiilesmaa V, Laivuori H. Blood pressure levels but not hypertensive complications have increased in Type 1 diabetes pregnancies during 1989-2010. *Diabetic medicine : a journal of the British Diabetic Association.* 2013 Sep;30(9):1087-93.

1802. Klemmensen A, Tabor A, Osterdal ML, Knudsen VK, Halldorsson TI, Mikkelsen TB, et al. Intake of vitamin C and E in pregnancy and risk of pre-eclampsia: prospective study among 57 346 women. *Bjog.* 2009 Jun;116(7):964-74.

1803. Knight KM, Pressman EK, Hackney DN, Thornburg LL. Perinatal outcomes in type 2 diabetic patients compared with non-diabetic patients matched by body mass index. *The journal of maternal-fetal & neonatal medicine : the official journal of the European Association of Perinatal Medicine, the Federation of Asia and Oceania Perinatal Societies, the International Society of Perinatal Obstet.* 2012 Jun;25(6):611-5.

1804. Knight M, Kurinczuk JJ, Spark P, Brocklehurst P. Extreme obesity in pregnancy in the United Kingdom. *Obstetrics and Gynecology.* 2010 May;115(5):989-97.

1805. Knudsen A, Kronborg G, Dahl Knudsen J, Lebech AM. Laboratory exposure to *Brucella melitensis* in Denmark: A prospective study. *Journal of Hospital Infection.* 2013 November;85(3):237-9.

1806. Ko HS, Kim MY, Kim YH, Lee J, Park YG, Moon HB, et al. Obstructive sleep apnea screening and perinatal outcomes in Korean pregnant women. *Arch Gynecol Obstet.* 2013 Mar;287(3):429-33.

1807. Ko PC, Peng HH, Soong YK, Chang SD. Triplet pregnancy complicated with one hydatidiform mole and preeclampsia in a 46,XY female with gonadal dysgenesis. *Taiwanese Journal of Obstetrics and Gynecology.* 2007 September;46(3):276-80.

1808. Kock K, Kock F, Klein K, Bancher-Todesca D, Helmer H. Diabetes mellitus and the risk of preterm birth with regard to the risk of spontaneous preterm birth. *The journal of maternal-fetal & neonatal medicine : the official journal of the European Association of Perinatal Medicine, the Federation of Asia and Oceania Perinatal Societies, the International Society of Perinatal Obstet.* 2010 Sep;23(9):1004-8.

1809. Kocyigit Y, Atamer Y, Atamer A, Tuzcu A, Akkus Z. Changes in serum levels of leptin, cytokines and lipoprotein in pre-eclamptic and normotensive pregnant women. *Gynecological Endocrinology.* 2004 November;19(5):267-73.

1810. Kofinas A, Kofinas G, Sutija V. The role of second trimester ultrasound in the diagnosis of placental hypoechoic lesions leading to poor pregnancy outcome. *The journal of maternal-fetal & neonatal medicine : the official journal of the European Association of Perinatal Medicine, the Federation of Asia and Oceania Perinatal Societies, the International Society of Perinatal Obstet.* 2007 Dec;20(12):859-66.

1811. Koh JH, Ko HS, Kwok SK, Ju JH, Park SH. Hydroxychloroquine and pregnancy on lupus flares in Korean patients with systemic lupus erythematosus. *Lupus*. 2015 24 Feb;24(2):210-7.
1812. Kohler JR, Tencer J, Thysell H, Forsberg L, Hellstrom M. Long-term effects of reflux nephropathy on blood pressure and renal function in adults. *Nephron*. 2003 Jan;Clinical practice. 93(1):C35-46.
1813. Kokab H, Jamil F. Complications and obstetrical outcome in grand multiparous women. *Medical Forum Monthly*. 2005 May;16(5):16-9.
1814. Kokila MS, Dwivedi AD. Correlation of clinical and neuroimaging findings affecting management in postpartum eclampsia: A prospective study. *Journal of SAFOG*. 2011 September-December;3(3):125-30.
1815. Kolas T, Nakling J, Salvesen KA. Smoking during pregnancy increases the risk of preterm births among parous women. *Acta Obstet Gynecol Scand*. 2000 Aug;79(8):644-8.
1816. Kolla V, Jenö P, Moes S, Lapaire O, Hoesli I, Hahn S. Quantitative proteomic (iTRAQ) analysis of 1st trimester maternal plasma samples in pregnancies at risk for preeclampsia. *Journal of Biomedicine & Biotechnology*. 2012;2012:305964.
1817. Kolstad E, Gilhus NE, Veiby G, Reiter SF, Lossius MI, Bjork M. Epilepsy and eating disorders during pregnancy: Prevalence, complications and birth outcome. *Seizure*. 2015 01 May;28:81-4.
1818. Komala K, Reddy M, Jehan Quadri I, Suneetha B, Ramya V. Comparative study of oral and vaginal misoprostol for induction of labour, maternal and foetal outcome. *Journal of Clinical and Diagnostic Research*. 2013 15 Dec;7(12):2866-9.
1819. Kongubol A, Phupong V. Prepregnancy obesity and the risk of gestational diabetes mellitus. *BMC pregnancy and childbirth*. 2011 10 Aug;11(59).
1820. Koopmans CM, van der Tuuk K, Groen H, Doornbos JP, de Graaf IM, van der Salm PC, et al. Prediction of postpartum hemorrhage in women with gestational hypertension or mild preeclampsia at term. *Acta Obstet Gynecol Scand*. 2014 Apr;93(4):399-407.
1821. Kopylov U, Avidan B, Papageorgiou NP, Katz LH, Sivan E, Zimlichman E, et al. Idiopathic liver function test abnormality in pregnancy is associated with assisted reproduction techniques. *Fertility and sterility*. 2013 February;99(2):377-81.e3.
1822. Kor-anantakul O, Lekhakula A. Overt disseminated intravascular coagulation in obstetric patients. *Journal of the Medical Association of Thailand = Chotmaihet thangphaet*. 2007 May;90(5):857-64.
1823. Korejo R, Bhutta S, Noorani KJ, Bhutta ZA. An audit and trends of perinatal mortality at the Jinnah Postgraduate Medical Centre, Karachi. *JPMA The Journal of the Pakistan Medical Association*. 2007 Apr;57(4):168-72.
1824. Korhonen K. Hyperbaric oxygen therapy in acute necrotizing infections. With a special reference to the effects on tissue gas tensions. *Annales chirurgiae et gynaecologiae*. 2000;89 Suppl 214:7-36.
1825. Korpraphong S, Tanawattanacharoen S. Outcome of pregnancies complicated by twin-twin transfusion syndrome in King Chulalongkorn Memorial Hospital. *Journal of the Medical Association of Thailand = Chotmaihet thangphaet*. 2010 Oct;93(10):1137-44.
1826. Kort DH, Gosselin J, Choi JM, Thornton MH, Cleary-Goldman J, Sauer MV. Pregnancy after age 50: Defining risks for mother and child. *American Journal of Perinatology*. 2012;29(4):245-9.
1827. Korucuoglu U, Biri A, Turkyilmaz E, Doga Yildirim F, Ilhan M, Hirfanoglu IM, et al. Glycemic levels with glucose loading test during pregnancy and its association with maternal and perinatal outcomes. *Diabetes Research and Clinical Practice*. 2008 April;80(1):69-74.
1828. Kosar A, Kasapoglu B, Kalyoncu S, Turan H, Balcik OS, Gumus EI. Treatment of adverse perinatal outcome in inherited thrombophilias: a clinical study. *Blood coagulation & fibrinolysis : an international journal in haemostasis and thrombosis*. 2011 Jan;22(1):14-8.
1829. Kosinska-Kaczynska K, Szymusik I, Kaczynski B, Bomba-Opon D, Wegrzyn P, Dzwigala B, et al. Iatrogenic and spontaneous late preterm twins--which are at higher risk of neonatal complications?

Ginekol Pol. 2013 Jun;84(6):430-5.

1830. Kosinska-Kaczynska K, Szymusik I, Kaczynski B, Bomba-Opon D, Wegrzyn P, Dzwigala B, et al. Iatrogenic and spontaneous late preterm twins - which are at higher risk of neonatal complications?. [Polish, English]

Jatrogenne i samoistne pozne wczesniactwo wsrod blizniat a ryzyko powikl{strok}an noworodkowych. Ginekologia Polska. 2013;84(6):430-5.

1831. Kostopanagiotou G, Kalimeris K, Pandazi A, Salamalekis G, Chrelias C, Matsota P. The role of the post-anaesthesia care unit in the management of high-risk obstetric patients. Archives of Medical Science. 2011 February;7(1):123-6.

1832. Koual M, Abbou H, Carbonnel M, Picone O, Ayoubi JM. Short-term outcome of patients with preeclampsia. Vasc Health Risk Manag. 2013;9:143-8.

1833. Koum K, Hy S, Tiv S, Sieng T, Obara H, Matsui M, et al. Characteristics of antepartum and intrapartum eclampsia in the National Maternal and Child Health Center in Cambodia. The journal of obstetrics and gynaecology research. 2004 Apr;30(2):74-9.

1834. Kourouklaris A, Ioannou K, Athanasiou I, Panagidou A, Demetriou K, Zavros M. Postpartum thrombotic microangiopathy revealed as atypical hemolytic uremic syndrome successfully treated with eculizumab: a case report. J Med Case Rep. 2014;8:307.

1835. Kovacheva VP, Soens MA, Tsen LC. Serum uric acid as a novel marker for uterine atony and post-spinal vasopressor use during cesarean delivery. Int J Obstet Anesth. 2013 Jul;22(3):200-8.

1836. Kovacs M, Hartwig M, Aleksza M, Tihanyi M, Nagy T, Vajda G, et al. Antiphospholipid antibodies in relation to sterility/infertility. Human immunology. 2012 Jul;73(7):726-31.

1837. Kozhimannil KB, Hung P, Prasad S, Casey M, Moscovice I. Rural-urban differences in obstetric care, 2002-2010, and implications for the future. Medical Care. 2014 January;52(1):4-9.

1838. Kozic JR, Benton SJ, Hutcheon JA, Payne BA, Magee LA, von Dadelszen P. Abnormal liver function tests as predictors of adverse maternal outcomes in women with preeclampsia. Journal of obstetrics and gynaecology Canada : JOGC = Journal d'obstetrique et gynecologie du Canada : JOGC. 2011 Oct;33(10):995-1004.

1839. Kramer J, Bowen A, Stewart N, Muhajarine N. Nausea and vomiting of pregnancy: Prevalence, severity and relation to psychosocial health. MCN The American Journal of Maternal/Child Nursing. 2013 January-February;38(1):21-7.

1840. Kramer MS, Abenhaim H, Dahhou M, Rouleau J, Berg C. Incidence, risk factors, and consequences of amniotic fluid embolism. Paediatric and perinatal epidemiology. 2013 September;27(5):436-41.

1841. Kramer MS, Berg C, Abenhaim H, Dahhou M, Rouleau J, Mehrabadi A, et al. Incidence, risk factors, and temporal trends in severe postpartum hemorrhage. Am J Obstet Gynecol. 2013 Nov;209(5):449.e1-7.

1842. Kramer MS, Rouleau J, Baskett TF, Joseph KS. Amniotic-fluid embolism and medical induction of labour: a retrospective, population-based cohort study. Lancet. 2006 Oct 21;368(9545):1444-8.

1843. Krasnianski M, Schluter A, Neudecker S, Spielmann RP, Stock K. Serial magnet resonance angiography in patients with vasculitis and vasculitis-like angiopathy of the central nervous system. European journal of medical research. 2004 May 28;9(5):247-55.

1844. Krediet TG, Wiertsema SP, Vossers MJ, Hoeks SB, Fleer A, Ruven HJ, et al. Toll-like receptor 2 polymorphism is associated with preterm birth. Pediatr Res. 2007 Oct;62(4):474-6.

1845. Kreiser D, Baum M, Seidman DS, Fanaroff A, Shah D, Hendler I, et al. End tidal carbon monoxide levels are lower in women with gestational hypertension and pre-eclampsia. Journal of Perinatology. 2004 April;24(4):213-7.

1846. Kremer AE, Bolier R, Dixon PH, Geenes V, Chambers J, Tolenaars D, et al. Autotaxin activity has a high accuracy to diagnose intrahepatic cholestasis of pregnancy. Journal of Hepatology. 2015 01

Apr;62(4):897-904.

1847. Krieg SA, Henne MB, Westphal LM. Obstetric outcomes in donor oocyte pregnancies compared with advanced maternal age in in vitro fertilization pregnancies. *Fertility and sterility*. 2008 Jul;90(1):65-70.

1848. Kritselis I, Tzanetakou V, Adamis G, Anthopoulos G, Antoniadou E, Bristianou M, et al. The level of endotoxemia in sepsis varies in relation to the underlying infection: Impact on final outcome. *Immunology letters*. 2013 May;152(2):167-72.

1849. Kronborg CS, Gjedsted J, Vittinghus E, Hansen TK, Allen J, Knudsen UB. Longitudinal measurement of cytokines in pre-eclamptic and normotensive pregnancies. *Acta Obstet Gynecol Scand*. 2011 Jul;90(7):791-6.

1850. Kruske S, Schultz T, Eales S, Kildea S. A retrospective, descriptive study of maternal and neonatal transfers, and clinical outcomes of a Primary Maternity Unit in rural Queensland, 2009-2011. *Women and Birth*. 2015 01 Mar;28(1):30-9.

1851. Kucuk M, Sezer SD, Yenisey C, Yuksel H, Odabasi AR. Comparison of interleukin-6 levels in maternal and umbilical cord blood in early- and late-onset preeclampsia. *Gynecological endocrinology : the official journal of the International Society of Gynecological Endocrinology*. 2012 Aug;28(8):640-3.

1852. Kucukgoz Gulec U, Ozgunen FT, Buyukkurt S, Guzel AB, Urunsak IF, Demir SC, et al. Comparison of clinical and laboratory findings in early- and late-onset preeclampsia. *The journal of maternal-fetal & neonatal medicine : the official journal of the European Association of Perinatal Medicine, the Federation of Asia and Oceania Perinatal Societies, the International Society of Perinatal Obstet*. 2013 Aug;26(12):1228-33.

1853. Kuessel L, Wild J, Haslacher H, Perkmann T, Ristl R, Zeisler H, et al. Urine and serum concentrations of Cytokeratin 19 in preeclampsia. *European Journal of Obstetrics Gynecology and Reproductive Biology*. 2014 01 Oct;181:311-5.

1854. Kuivasaari-Pirinen P, Raatikainen K, Hippelainen M, Heinonen S. Adverse outcomes of IVF/ICSI pregnancies vary depending on aetiology of infertility. *ISRN Obstetrics and Gynecology*. 2012(451915).

1855. Kukla L, Hrubá D, Tyrlik M. Smoking and damages of reproduction: Evidence of ELSPAC. *Central European Journal of Public Health*. 2001;9(2):59-63.

1856. Kulak W, Okurowska-Zawada B, Sienkiewicz D, Paszko-Patej G, Krajewska-Kulak E. Risk factors for cerebral palsy in term birth infants. *Adv Med Sci*. 2010;55(2):216-21.

1857. Kulkarni A, Mehendale S, Pisal H, Kilari A, Dangat K, Salunkhe S, et al. Association of omega-3 fatty acids and homocysteine concentrations in pre-eclampsia. *Clinical nutrition (Edinburgh, Scotland)*. 2011 Feb;30(1):60-4.

1858. Kulkarni N, Bhat BS, Krishna L, Shailaja N. A one year cross sectional study of maternal and fetal outcome in booked and referred cases. *Biomedicine (India)*. 2013 January-March;33(1):57-64.

1859. Kullberg G, Lindeberg S, Hanson U. Eclampsia in Sweden. *Hypertension in pregnancy*. 2002;21(1):13-21.

1860. Kullima AA, Kawuwa MB, Audu BM, Geidam AD, Mairiga AG. Trends in maternal mortality in a tertiary institution in Northern Nigeria. *Ann Afr Med*. 2009 Oct-Dec;8(4):221-4.

1861. Kullima AA, Kawuwa MB, Audu BM, Usman H, Geidam AD. A 5-year review of maternal mortality associated with eclampsia in a tertiary institution in northern Nigeria. *Ann Afr Med*. 2009 Apr-Jun;8(2):81-4.

1862. Kulmala L, Phupong V. Combination of plasma-soluble fms-like tyrosine kinase 1 and uterine artery Doppler for the prediction of preeclampsia in cases of elderly gravida. *Hypertension research : official journal of the Japanese Society of Hypertension*. 2014 Jun;37(6):538-42.

1863. Kulshrestha M, Rohatgi A, Sharma SK, Yadav KK, Pardasani V. A study of pregnancy related strokes. *Journal of Internal Medicine of India*. 2001;4(3):110-4.

1864. Kulungowski AM, Kashuk JL, Moore EE, Hutting HG, Sadaria MR, Cothren CC, et al. Hemolysis,

elevated liver enzymes, and low platelets syndrome: when is surgical help needed? *American journal of surgery*. 2009 Dec;198(6):916-20.

1865. Kumar A, Basra M, Begum N, Rani V, Prasad S, Lamba AK, et al. Association of maternal periodontal health with adverse pregnancy outcome. *Journal of Obstetrics and Gynaecology Research*. 2013 January;39(1):40-5.

1866. Kumar A, Begum N, Prasad S, Lamba AK, Verma M, Agarwal S, et al. Role of cytokines in development of pre-eclampsia associated with periodontal disease - Cohort Study. *J Clin Periodontol*. 2014 Apr;41(4):357-65.

1867. Kumar A, Devi SG, Batra S, Singh C, Shukla DK. Calcium supplementation for the prevention of pre-eclampsia. *International Journal of Gynecology and Obstetrics*. 2009 January;104(1):32-6.

1868. Kumar A, Singh T, Basu S, Pandey S, Bhargava V. Outcome of teenage pregnancy. *Indian J Pediatr*. 2007 Oct;74(10):927-31.

1869. Kumar BS, Sarmila K, Prasad KS. Prediction of preeclampsia by midtrimester uterine artery doppler velocimetry in high-risk and low-risk women. *Journal of Obstetrics and Gynecology of India*. 2012 June;62(3):297-300.

1870. Kumar Praveen N. A study on the risk profile of postnatal women with low birth weight babies. *Indian Journal of Public Health Research and Development*. 2013 April-June;4(2):139-43.

1871. Kumar S, Ali W, Verma AK, Pandey A, Rathore S. Epidemiology and mortality of burns in the Lucknow Region, India - A 5 year study. *Burns*. 2013 December;39(8):1599-605.

1872. Kumar S, Bag S, Ganesamoni R, Mandal AK, Taneja N, Singh SK. Risk factors for urosepsis following percutaneous nephrolithotomy: role of 1 week of nitrofurantoin in reducing the risk of urosepsis. *Urological research*. 2012 Feb;40(1):79-86.

1873. Kumar S, Siyal AA. Maternal risk factors affecting birth weight of babies at PMC Hospital Nawabshah. *Medical Forum Monthly*. 2010 March;21(3):30-3.

1874. Kumari A, Singh S, Chaturvedi M. Peripartum cardiomyopathy: A review of three case reports. *Journal of SAFOG*. 2012;4(3):164-6.

1875. Kumru P, Erdogan E, Arisoy R, Demirci O, Ozkoral A, Ardic C, et al. Effect of thyroid dysfunction and autoimmunity on pregnancy outcomes in low risk population. *Archives of Gynecology and Obstetrics*. 2015;291(5):1047-54.

1876. Kunze M, Arndt S, Zimmer A, Foldi M, Hanjalic-Beck A, Echternach M, et al. Idiopathic facial palsy during pregnancy. [German, English] *Periphere Fazialisparese in der Schwangerschaft*. Hno. 2012 February;60(2):98-101.

1877. Kuo PL, Lin CC, Lin YH, Guo HR. Placental sonolucency and pregnancy outcome in women with elevated second trimester serum alpha-fetoprotein levels. *Journal of the Formosan Medical Association = Taiwan yi zhi*. 2003 May;102(5):319-25.

1878. Kurata A, Matsuda Y, Tanabe K, Toma H, Ohta H. Risk factors of preterm delivery at less than 35 weeks in patients with renal transplant. *European journal of obstetrics, gynecology, and reproductive biology*. 2006 Sep-Oct;128(1-2):64-8.

1879. Kurdi AM, Mesleh RA, Al-Hakeem MM, Khashoggi TY, Khalifa HM. Multiple pregnancy and preterm labor. *Saudi medical journal*. 2004 May;25(5):632-7.

1880. Kurdi W, Fayyad A, Thakur V, Harrington K. Delayed normalization of uterine artery Doppler waveforms is not a benign phenomenon. *European journal of obstetrics, gynecology, and reproductive biology*. 2004 Nov 10;117(1):20-3.

1881. Kurdi W, Fayyad A, Thakur V, Harrington K. Delayed normalisation of uterine artery doppler waveforms is not a benign phenomenon. *European Journal of Obstetrics Gynecology and Reproductive Biology*. 2004 10 Nov;117(1):20-3.

1882. Kurdoglu M, Kurdoglu Z, Ozen S, Kucukaydin Z, Bulut G, Erten R, et al. Expression of laminin receptor 1 in human placentas from normal and preeclamptic pregnancies and its relationship with the

- severity of preeclampsia. *J Perinat Med*. 2011 Jul;39(4):411-6.
1883. Kurki T, Hiilesmaa V, Raitasalo R, Mattila H, Ylikorkala O. Depression and anxiety in early pregnancy and risk for preeclampsia. *Obstet Gynecol*. 2000 Apr;95(4):487-90.
1884. Kurkinen-Raty M, Koivisto M, Jouppila P. Preterm delivery for maternal or fetal indications: maternal morbidity, neonatal outcome and late sequelae in infants. *Bjog*. 2000 May;107(5):648-55.
1885. Kurtoglu E, Kokcu A, Celik H, Tosun M, Malatyalioglu E. May ratio of neutrophil to lymphocyte be useful in predicting the risk of developing preeclampsia? A pilot study. *Journal of Maternal-Fetal and Neonatal Medicine*. 2015 01 Jan;28(1):97-9.
1886. Kurtoglu S, Caksen H, Poyrazoglu MH. Neonatal poisonings in middle Anatolia of Turkey: an analysis of 72 cases. *The Journal of toxicological sciences*. 2000 May;25(2):115-9.
1887. Kusanovic JP, Romero R, Chaiworapongsa T, Erez O, Mittal P, Vaisbuch E, et al. A prospective cohort study of the value of maternal plasma concentrations of angiogenic and anti-angiogenic factors in early pregnancy and midtrimester in the identification of patients destined to develop preeclampsia. *The journal of maternal-fetal & neonatal medicine : the official journal of the European Association of Perinatal Medicine, the Federation of Asia and Oceania Perinatal Societies, the International Society of Perinatal Obstet*. 2009 Nov;22(11):1021-38.
1888. Kusanovic JP, Romero R, Chaiworapongsa T, Erez O, Mittal P, Vaisbuch E, et al. A prospective cohort study of the value of maternal plasma concentrations of angiogenic and anti-angiogenic factors in early pregnancy and midtrimester in the identification of patients destined to develop preeclampsia Prediction of preeclampsia J. P. Kusanovic et al. *Journal of Maternal-Fetal and Neonatal Medicine*. 2009 November;22(11):1021-38.
1889. Kusanovic JP, Romero R, Hassan SS, Gotsch F, Edwin S, Chaiworapongsa T, et al. Maternal serum soluble CD30 is increased in normal pregnancy, but decreased in preeclampsia and small for gestational age pregnancies. *The journal of maternal-fetal & neonatal medicine : the official journal of the European Association of Perinatal Medicine, the Federation of Asia and Oceania Perinatal Societies, the International Society of Perinatal Obstet*. 2007 Dec;20(12):867-78.
1890. Kvehaugen AS, Andersen LF, Staff AC. Dietary intake and physical activity in women and offspring after pregnancies complicated by preeclampsia or diabetes mellitus. *Acta Obstet Gynecol Scand*. 2010 Nov;89(11):1486-90.
1891. Kvehaugen AS, Andersen LF, Staff AC. Anthropometry and cardiovascular risk factors in women and offspring after pregnancies complicated by preeclampsia or diabetes mellitus. *Acta Obstet Gynecol Scand*. 2010 Nov;89(11):1478-85.
1892. Kvehaugen AS, Dechend R, Ramstad HB, Troisi R, Fugelseth D, Staff AC. Endothelial function and circulating biomarkers are disturbed in women and children after preeclampsia. *Hypertension*. 2011 Jul;58(1):63-9.
1893. Kvehaugen AS, Melien O, Holmen OL, Laivuori H, Oian P, Andersgaard AB, et al. Single nucleotide polymorphisms in G protein signaling pathway genes in preeclampsia. *Hypertension*. 2013 March;61(3):655-61.
1894. Kvehaugen AS, Melien T, Holmen OL, Laivuori H, Dechend R, Staff AC. Hypertension after preeclampsia and relation to the C1114G polymorphism (rs4606) in RGS2: Data from the Norwegian HUNT2 study. *BMC Medical Genetics*. 2014 05 Mar;15(1).
1895. Kwan BC, Chow KM, Leung CB, Law MC, Cheng PM, Yu V, et al. Circulating bacterial-derived DNA fragments as a marker of systemic inflammation in peritoneal dialysis. *Nephrology, dialysis, transplantation : official publication of the European Dialysis and Transplant Association - European Renal Association*. 2013 Aug;28(8):2139-45.
1896. Kwik M, Seeho SK, Smith C, McElduff A, Morris JM. Outcomes of pregnancies affected by impaired glucose tolerance. *Diabetes Res Clin Pract*. 2007 Aug;77(2):263-8.
1897. Kwon WY, Suh GJ, Kim KS, Kwak YH. Niacin attenuates lung inflammation and improves survival

during sepsis by downregulating the nuclear factor-kappaB pathway. *Crit Care Med.* 2011 Feb;39(2):328-34.

1898. Kyrou D, Kolibianakis EM, Devroey P, Fatemi HM. Is the use of donor sperm associated with a higher incidence of preeclampsia in women who achieve pregnancy after intrauterine insemination? *Fertility and sterility.* 2010 Mar 1;93(4):1124-7.

1899. Kyvernitakis I, Khatib R, Stricker N, Arabin B. Is early treatment with a cervical pessary an option in patients with a history of surgical conisation and a short cervix? *Geburtshilfe und Frauenheilkunde.* 2014 November;74(11):1003-8.

1900. Laasanen J, Helisalmi S, Iivonen S, Eloranta ML, Hiltunen M, Heinonen S. Gamma 2 actin gene (enteric type) polymorphism is not associated with obstetric cholestasis or preeclampsia. *Fetal Diagn Ther.* 2008;23(1):36-40.

1901. Laasanen J, Hiltunen M, Punnonen K, Mannermaa A, Heinonen S. Fibrinogen and factor VII promoter polymorphisms in women with preeclampsia. *Obstet Gynecol.* 2002 Aug;100(2):317-20.

1902. LaCoursiere DY, Bloebaum L, Duncan JD, Varner MW. Population-based trends and correlates of maternal overweight and obesity, Utah 1991-2001. *Am J Obstet Gynecol.* 2005 Mar;192(3):832-9.

1903. Lahmer T, Kuchle C, Schirmer L, Heemann U, Lutz J, Thurmel K. Kidney transplant after preexisting posterior reversible encephalopathy syndrome induced by Goodpasture's syndrome. *Experimental and clinical transplantation : official journal of the Middle East Society for Organ Transplantation.* 2012 Jun;10(3):299-301.

1904. Lai HY, Tsai PS, Fan YC, Huang CJ. Anesthetic practice for Caesarean section and factors influencing anesthesiologists' choice of anesthesia: A population-based study. *Acta Anaesthesiologica Scandinavica.* 2014 August;58(7):843-50.

1905. Lai J, Poon LCY, Bakalis S, Chiriac R, Nicolaidis KH. Systolic, diastolic and mean arterial pressure at 30-33 weeks in the prediction of preeclampsia. *Fetal Diagnosis and Therapy.* 2013 May;33(3):173-81.

1906. Lain KY, Markovic N, Ness RB, Roberts JM. Effect of smoking on uric acid and other metabolic markers throughout normal pregnancy. *The Journal of clinical endocrinology and metabolism.* 2005 Oct;90(10):5743-6.

1907. Laivuori H, Gallaher MJ, Collura L, Crombleholme WR, Markovic N, Rajakumar A, et al. Relationships between maternal plasma leptin, placental leptin mRNA and protein in normal pregnancy, pre-eclampsia and intrauterine growth restriction without pre-eclampsia. *Mol Hum Reprod.* 2006 Sep;12(9):551-6.

1908. Lakhdar R, Baffoun N, Hammami N, Nagi S, Baccar K, Drissi S, et al. Neuroradiological pattern of peripartum cerebro vascular disease medicating transfer to determine care unit  
Aspects neuroradiologiques de la pathologie vasculaire cerebrale du peripartum necessitant un transfert en milieu de reanimation. *Tunisie Medicale.* 2012;90(3):223-32.

1909. Lakshmi CVS, Pramod G, Geeta K, Subramaniam S, Rao MB, Kallapur SG, et al. Outcome of very low birth weight infants with abnormal antenatal doppler flow patterns: A prospective cohort study. *Indian Pediatrics.* 2013 September;50(9):847-52.

1910. Lal AK, Gao W, Hibbard JU. Eclampsia: Maternal and neonatal outcomes. *Pregnancy Hypertension.* 2013 July;3(3):186-90.

1911. Lam PM, Yuen PM, Lau TK, Leung TN. Relationship between birthweight and repeated courses of antenatal corticosteroids. *The Australian & New Zealand journal of obstetrics & gynaecology.* 2001 Aug;41(3):281-4.

1912. Lambert G, Brichant JF, Hartstein G, Bonhomme V, Dewandre PY. Preeclampsia: An update. *Acta Anaesthesiologica Belgica.* 2014;65(4):137-49.

1913. Lambert-Messierian GM, Silver HM, Petraglia F, Luisi S, Pezzani I, Maybruck WM, et al. Second-trimester levels of maternal serum human chorionic gonadotropin and inhibin A as predictors of preeclampsia in the third trimester of pregnancy. *Journal of the Society for Gynecologic Investigation.*

2000 May/June;7(3):170-4.

1914. Lamontagne A, Cote AM, Rey E. The urinary protein-to-creatinine ratio in Canadian women at risk of preeclampsia: does the time of day of testing matter? *Journal of obstetrics and gynaecology Canada : JOGC = Journal d'obstetrique et gynecologie du Canada : JOGC.* 2014 Apr;36(4):303-8.

1915. Lampinen KH, Ronnback M, Groop PH, Kaaja RJ. A relationship between insulin sensitivity and vasodilation in women with a history of preeclamptic pregnancy. *Hypertension.* 2008 Aug;52(2):394-401.

1916. Lange M, Broking K, Hucklenbruch C, Ertmer C, Van Aken H, Lucke M, et al. Hemodynamic effects of titrated norepinephrine in healthy versus endotoxemic sheep. *Journal of endotoxin research.* 2007;13(1):53-7.

1917. Langen ES, Chakravarty EF, Liaquat M, El-Sayed YY, Druzin ML. High rate of preterm birth in pregnancies complicated by rheumatoid arthritis. *American Journal of Perinatology.* 2014 January;31(1):9-13.

1918. Langenveld J, Buttinger A, Van Der Post J, Wolf H, Mol BW, Ganzevoort W. Recurrence risk and prediction of a delivery under 34 weeks of gestation after a history of a severe hypertensive disorder. *BJOG: An International Journal of Obstetrics and Gynaecology.* 2011 April;118(5):589-95.

1919. Langenveld J, Ravelli AC, van Kaam AH, van der Ham DP, van Pampus MG, Porath M, et al. Neonatal outcome of pregnancies complicated by hypertensive disorders between 34 and 37 weeks of gestation: a 7 year retrospective analysis of a national registry. *Am J Obstet Gynecol.* 2011 Dec;205(6):540.e1-7.

1920. Langford A, Joshu C, Chang JJ, Myles T, Leet T. Does gestational weight gain affect the risk of adverse maternal and infant outcomes in overweight women? *Matern Child Health J.* 2011 Oct;15(7):860-5.

1921. Lao TT, Sahota DS, Cheng YK, Law LW, Leung TY. Maternal hepatitis B surface antigen status and incidence of pre-eclampsia. *Journal of viral hepatitis.* 2013 May;20(5):343-9.

1922. Lao TT, Sahota DS, Cheng YKY, Law LW, Leung TY. Advanced maternal age and postpartum hemorrhage-risk factor or red herring? *Journal of Maternal-Fetal and Neonatal Medicine.* 2014 February;27(3):243-6.

1923. Lao TT, Tam KF. Gestational diabetes diagnosed in third trimester pregnancy and pregnancy outcome. *Acta Obstet Gynecol Scand.* 2001 Nov;80(11):1003-8.

1924. Lao TT, Tam KF, Chan LY. Third trimester iron status and pregnancy outcome in non-anaemic women; pregnancy unfavourably affected by maternal iron excess. *Human reproduction.* 2000 Aug;15(8):1843-8.

1925. Lapaire O, Zanetti-Dallenbach R, Weber P, Hosli I, Holzgreve W, Surbek D. Labor induction in preeclampsia: is misoprostol more effective than dinoprostone? *J Perinat Med.* 2007;35(3):195-9.

1926. Lapolla A, Bonomo M, Dalfra MG, Parretti E, Mannino D, Mello G, et al. Prepregnancy BMI influences maternal and fetal outcomes in women with isolated gestational hyperglycaemia: a multicentre study. *Diabetes & metabolism.* 2010 Sep;36(4):265-70.

1927. Lapolla A, Dalfra MG, Bonomo M, Parretti E, Mannino D, Mello G, et al. Gestational diabetes mellitus in Italy: A multicenter study. *European Journal of Obstetrics Gynecology and Reproductive Biology.* 2009 August;145(2):149-53.

1928. Lapolla A, Dalfra MG, Di Cianni G, Bonomo M, Parretti E, Mello G. A multicenter Italian study on pregnancy outcome in women with diabetes. *Nutrition, metabolism, and cardiovascular diseases : NMCD.* 2008 May;18(4):291-7.

1929. Larciprete G, Gioia S, Angelucci PA, Brosio F, Barbati G, Angelucci GP, et al. Single inherited thrombophilias and adverse pregnancy outcomes. *The journal of obstetrics and gynaecology research.* 2007 Aug;33(4):423-30.

1930. Larciprete G, Rossi F, Deaibess T, Brienza L, Barbati G, Romanini E, et al. Double inherited



thrombophilias and adverse pregnancy outcomes: fashion or science? *The journal of obstetrics and gynaecology research*. 2010 Oct;36(5):996-1002.

1931. Larkin JC, Hill LM, Speer PD, Simhan HN. Risk of morbid perinatal outcomes in small-for-gestational-age pregnancies: Customized compared with conventional standards of fetal growth. *Obstetrics and Gynecology*. 2012 January;119(1):21-7.

1932. LaRocca J, Binder AM, McElrath TF, Michels KB. The impact of first trimester phthalate and phenol exposure on IGF2/H19 genomic imprinting and birth outcomes. *Environ Res*. 2014 Aug;133:396-406.

1933. Larraz J, Marin N, Pineiro L, Cilla G, Perez-Trallero E. Lack of relationship between infection by *Helicobacter pylori* and vomiting that usually occurs during pregnancy, although possible relationship with severe forms of emesis. *Revista Espanola de Enfermedades Digestivas*. 2002 July;94(7):420-2.

1934. Larsen WI, Strong JE, Farley JH. Risk factors for late postpartum preeclampsia. *The Journal of reproductive medicine*. 2012 Jan-Feb;57(1-2):35-8.

1935. Lasabova Z, Zigo I, Svecova I, Szabo G, Stanclova A, Skerenova M, et al. Association of specific diplotypes defined by common rs1800682 and rare rs34995925 single nucleotide polymorphisms within the STAT1 transcription binding site of the FAS gene promoter with preeclampsia. *General physiology and biophysics*. 2014;33(2):199-204.

1936. Laskin S, Payne B, Hutcheon JA, Qu Z, Douglas MJ, Ford J, et al. The role of platelet counts in the assessment of inpatient women with preeclampsia. *Journal of obstetrics and gynaecology Canada : JOGC = Journal d'obstetrique et gynecologie du Canada : JOGC*. 2011 Sep;33(9):900-8.

1937. Laskov I, Birnbaum R, Maslovitz S, Kupfermanc M, Lessing J, Many A. Outcome of singleton pregnancy in women >45 years old: A retrospective cohort study. *Journal of Maternal-Fetal and Neonatal Medicine*. 2012 November;25(11):2190-3.

1938. Laskowska M, Laskowska K, Leszczynska-Gorzela B, Oleszczuk J. sCD40 ligand determined in maternal and umbilical cord blood in pregnancies complicated by pre-eclampsia with and without intrauterine growth retardation. *Gynecol Obstet Invest*. 2007;64(1):8-13.

1939. Lassey AT, Obed SA. Trends in concurrent maternal and perinatal deaths at a teaching hospital in Ghana: the facts and prevention strategies. *Journal of obstetrics and gynaecology Canada : JOGC = Journal d'obstetrique et gynecologie du Canada : JOGC*. 2004 Sep;26(9):799-804.

1940. Laszlo KD, Liu XQ, Svensson T, Wikstrom AK, Li J, Olsen J, et al. Psychosocial stress related to the loss of a close relative the year before or during pregnancy and risk of preeclampsia. *Hypertension*. 2013 Jul;62(1):183-9.

1941. Lataifeh I, Amarin Z, Zayed F, Al-Mehaisen L, Alchalabi H, Khader Y. Indications and outcome for obstetric patients' admission to intensive care unit: a 7-year review. *Journal of obstetrics and gynaecology : the journal of the Institute of Obstetrics and Gynaecology*. 2010 May;30(4):378-82.

1942. Lau LL, Halliday MI, Lee B, Hannon RJ, Gardiner KR, Soong CV. Intestinal manipulation during elective aortic aneurysm surgery leads to portal endotoxaemia and mucosal barrier dysfunction. *European journal of vascular and endovascular surgery : the official journal of the European Society for Vascular Surgery*. 2000 Jun;19(6):619-24.

1943. Laugerette F, Alligier M, Bastard JP, Drai J, Chanseau E, Lambert-Porcheron S, et al. Overfeeding increases postprandial endotoxemia in men: Inflammatory outcome may depend on LPS transporters LBP and sCD14. *Molecular nutrition & food research*. 2014 Jul;58(7):1513-8.

1944. Laughon SK, Catov J, Powers RW, Roberts JM, Gandley RE. First trimester uric acid and adverse pregnancy outcomes. *American journal of hypertension*. 2011 April;24(4):489-95.

1945. Lauszus FF, Fuglsang J, Flyvbjerg A, Klebe JG. Preterm delivery in normoalbuminuric, diabetic women without preeclampsia: the role of metabolic control. *European journal of obstetrics, gynecology, and reproductive biology*. 2006 Feb 1;124(2):144-9.

1946. Lauszus FF, Gron PL, Klebe JG. Association of polymorphism of

methylene-tetrahydro-folate-reductase with urinary albumin excretion rate in type 1 diabetes mellitus but not with preeclampsia, retinopathy, and preterm delivery. *Acta Obstet Gynecol Scand*. 2001 Sep;80(9):803-6.

1947. Lauszus FF, Rasmussen OW, Lousen T, Klebe TM, Klebe JG. Ambulatory blood pressure as predictor of preeclampsia in diabetic pregnancies with respect to urinary albumin excretion rate and glycemic regulation. *Acta Obstet Gynecol Scand*. 2001 Dec;80(12):1096-103.

1948. Lauw FN, Simpson AJ, Hack CE, Prins JM, Wolbink AM, van Deventer SJ, et al. Soluble granzymes are released during human endotoxemia and in patients with severe infection due to gram-negative bacteria. *The Journal of infectious diseases*. 2000 Jul;182(1):206-13.

1949. Laverriere A, Landau R, Charvet I, Irion O, Bischof P, Morales M, et al. GRP78 as a marker of pre-eclampsia: An exploratory study. *Molecular Human Reproduction*. 2009;15(9):569-74.

1950. Lawlor DA, Batty GD, Morton SMB, Deary IJ, Macintyre S, Ronalds G, et al. Early life predictors of childhood intelligence: Evidence from the Aberdeen children of the 1950s study. *Journal of epidemiology and community health*. 2005 August;59(8):656-63.

1951. Lawlor DA, Macdonald-Wallis C, Fraser A, Nelson SM, Hingorani A, Davey Smith G, et al. Cardiovascular biomarkers and vascular function during childhood in the offspring of mothers with hypertensive disorders of pregnancy: findings from the Avon Longitudinal Study of Parents and Children. *Eur Heart J*. 2012 Feb;33(3):335-45.

1952. Lawlor DA, Morton SM, Nitsch D, Leon DA. Association between childhood and adulthood socioeconomic position and pregnancy induced hypertension: results from the Aberdeen children of the 1950s cohort study. *Journal of epidemiology and community health*. 2005 Jan;59(1):49-55.

1953. Lawlor DA, Morton SMB, Nitsch D, Leon DA. Association between childhood and adulthood socioeconomic position and pregnancy induced hypertension: Results from the Aberdeen children of the 1950s cohort study. *Journal of epidemiology and community health*. 2005 January;59(1):49-55.

1954. Lawn N, Laich E, Ho S, Martin R, Faught E, Knowlton R, et al. Eclampsia, hippocampal sclerosis, and temporal lobe epilepsy: accident or association? *Neurology*. 2004 Apr 27;62(8):1352-6.

1955. Lazar L, Rigo J, Jr., Nagy B, Balogh K, Mako V, Cervenak L, et al. Relationship of circulating cell-free DNA levels to cell-free fetal DNA levels, clinical characteristics and laboratory parameters in preeclampsia. *BMC Med Genet*. 2009;10:120.

1956. Lazdam M, de la Horra A, Diesch J, Kenworthy Y, Davis E, Lewandowski AJ, et al. Unique blood pressure characteristics in mother and offspring after early onset preeclampsia. *Hypertension*. 2012 Nov;60(5):1338-45.

1957. Le Ray C, Scherier S, Anselem O, Marszalek A, Tsatsaris V, Cabrol D, et al. Association between oocyte donation and maternal and perinatal outcomes in women aged 43 years or older. *Human reproduction*. 2012 Mar;27(3):896-901.

1958. Le Thi Huong D, Wechsler B, Vauthier-Brouzes D, Duhaut P, Costedoat N, Andreu MR, et al. The second trimester Doppler ultrasound examination is the best predictor of late pregnancy outcome in systemic lupus erythematosus and/or the antiphospholipid syndrome. *Rheumatology*. 2006 March;45(3):332-8.

1959. Le Thi Thuong D, Tieulie N, Costedoat N, Andreu MR, Wechsler B, Vauthier-Brouzes D, et al. The HELLP syndrome in the antiphospholipid syndrome: retrospective study of 16 cases in 15 women. *Ann Rheum Dis*. 2005 Feb;64(2):273-8.

1960. Leanos-Miranda A, Campos-Galicia I, Isordia-Salas I, Rivera-Leanos R, Romero-Arauz JF, Ayala-Mendez JA, et al. Changes in circulating concentrations of soluble fms-like tyrosine kinase-1 and placental growth factor measured by automated electrochemiluminescence immunoassays methods are predictors of preeclampsia. *J Hypertens*. 2012 Nov;30(11):2173-81.

1961. Lebel DE, Levy A, Holcberg G, Sheiner E. Symphysiolysis as an independent risk factor for cesarean delivery. *The journal of maternal-fetal & neonatal medicine : the official journal of the*

European Association of Perinatal Medicine, the Federation of Asia and Oceania Perinatal Societies, the International Society of Perinatal Obstet. 2010 May;23(5):417-20.

1962. Lebel DE, Sergienko R, Wiznitzer A, Velan GJ, Sheiner E. Mode of delivery and other pregnancy outcomes of patients with documented scoliosis. *Journal of Maternal-Fetal and Neonatal Medicine*. 2012 June;25(6):639-41.

1963. Lecarpentier E, Tsatsaris V, Goffinet F, Cabrol D, Sibai B, Haddad B. Risk factors of superimposed preeclampsia in women with essential chronic hypertension treated before pregnancy. *PloS one*. 2013;8(5):e62140.

1964. Lecoecur C, Thibon P, Prime L, Mercier PY, Balouet P, Durin L, et al. Frequency, causes and avoidability of outborn births in a French regional perinatal network. *European Journal of Obstetrics Gynecology and Reproductive Biology*. 2014 August;179:22-6.

1965. Leduc L, Dubois E, Takser L, Rey E, David M. Dalteparin and low-dose aspirin in the prevention of adverse obstetric outcomes in women with inherited thrombophilia. *Journal of obstetrics and gynaecology Canada : JOGC = Journal d'obstetrique et gynecologie du Canada : JOGC*. 2007 Oct;29(10):787-93.

1966. Lee BK, Zhang Z, Wikman A, Lindqvist PG, Reilly M. ABO and RhD blood groups and gestational hypertensive disorders: a population-based cohort study. *Bjog*. 2012 Sep;119(10):1232-7.

1967. Lee CJ, Hsieh TT, Chiu TH, Chen KC, Lo LM, Hung TH. Risk factors for pre-eclampsia in an Asian population. *International journal of gynaecology and obstetrics: the official organ of the International Federation of Gynaecology and Obstetrics*. 2000 Sep;70(3):327-33.

1968. Lee I, Neil JJ, Huettner PC, Smyser CD, Rogers CE, Shimony JS, et al. The impact of prenatal and neonatal infection on neurodevelopmental outcomes in very preterm infants. *Journal of Perinatology*. 2014 11 Oct;34(10):741-7.

1969. Lee J, Croen LA, Backstrand KH, Yoshida CK, Henning LH, Lindan C, et al. Maternal and infant characteristics associated with perinatal arterial stroke in the infant. *Journal of the American Medical Association*. 2005 09 Feb;293(6):723-9.

1970. Lee LC, Sheu BC, Shau WY, Liu DM, Lai TJ, Lee YH, et al. Mid-trimester beta-hCG levels incorporated in a multifactorial model for the prediction of severe pre-eclampsia. *Prenatal diagnosis*. 2000 Sep;20(9):738-43.

1971. Lee M, Saver JL, Chang KH, Liao HW, Chang SC, Ovbiagele B. Impact of microalbuminuria on incident stroke: a meta-analysis. *Stroke*. 2010 Nov;41(11):2625-31.

1972. Lee PC, Roberts JM, Catov JM, Talbott EO, Ritz B. First trimester exposure to ambient air pollution, pregnancy complications and adverse birth outcomes in Allegheny County, PA. *Matern Child Health J*. 2013 Apr;17(3):545-55.

1973. Lee PC, Talbott EO, Roberts JM, Catov JM, Bilonick RA, Stone RA, et al. Ambient air pollution exposure and blood pressure changes during pregnancy. *Environmental Research*. 2012 August;117:46-53.

1974. Lee QY, Odoi AT, Opare-Addo H, Dassah ET. Maternal mortality in Ghana: A hospital-based review. *Acta Obstetrica et Gynecologica Scandinavica*. 2012 January;91(1):87-92.

1975. Lee W, O'Connell CM, Baskett TF. Maternal and perinatal outcomes of eclampsia: Nova Scotia, 1981-2000. *Journal of obstetrics and gynaecology Canada : JOGC = Journal d'obstetrique et gynecologie du Canada : JOGC*. 2004 Feb;26(2):119-23.

1976. Lee-Ann Hawkins T, Brown MA, Mangos GJ, Davis GK. Transient gestational hypertension: Not always a benign event. *Pregnancy Hypertension*. 2012 January;2(1):22-7.

1977. Leeman L, Leeman R. A Native American community with a 7% cesarean delivery rate: does case mix, ethnicity, or labor management explain the low rate? *Ann Fam Med*. 2003 May-Jun;1(1):36-43.

1978. Leeners B, Neumaier-Wagner PM, Kuse S, Mutze S, Rudnik-Schoneborn S, Zerres K, et al. Recurrence risks of hypertensive diseases in pregnancy after HELLP syndrome. *J Perinat Med*. 2011

Nov;39(6):673-8.

1979. Lehmann C, Georgiew A, Weber M, Birnbaum J, Kox WJ. Reduction in intestinal leukocyte adherence in rat experimental endotoxemia by treatment with the 21-aminosteroid U-74389G. *Intensive care medicine*. 2001 Jan;27(1):258-63.
1980. Lei H, Wen SW, Walker M. Determinants of caesarean delivery among women hospitalized for childbirth in a remote population in China. *Journal of obstetrics and gynaecology Canada : JOGC = Journal d'obstetrique et gynecologie du Canada : JOGC*. 2003 Nov;25(11):937-43.
1981. Lei Q, Lv LJ, Zhang BY, Wen JY, Liu GC, Lin XH, et al. Ante-partum and post-partum markers of metabolic syndrome in pre-eclampsia. *Journal of human hypertension*. 2011 Jan;25(1):11-7.
1982. Leistra-Leistra MJ, Timmer A, van Spronsen FJ, Geven WB, van der Meer J, Erwich JJ. Fetal thrombotic vasculopathy in the placenta: a thrombophilic connection between pregnancy complications and neonatal thrombosis? *Placenta*. 2004 Apr;25 Suppl A:S102-5.
1983. Leitner Y, Harel S, Geva R, Eshel R, Yaffo A, Many A. The neurocognitive outcome of IUGR children born to mothers with and without preeclampsia. *The journal of maternal-fetal & neonatal medicine : the official journal of the European Association of Perinatal Medicine, the Federation of Asia and Oceania Perinatal Societies, the International Society of Perinatal Obstet*. 2012 Nov;25(11):2206-8.
1984. Lema VM, Changole J, Kanyighe C, Malunga EV. Maternal mortality at the Queen Elizabeth Central Teaching Hospital, Blantyre, Malawi. *East Afr Med J*. 2005 Jan;82(1):3-9.
1985. Lenhart PM, Nguyen T, Wise A, Caron KM, Herring AH, Stuebe AM. Adrenomedullin signaling pathway polymorphisms and adverse pregnancy outcomes. *American Journal of Perinatology*. 2014 April;31(4):327-33.
1986. Lepais L, Gailliot-Durand L, Boutitie F, Lebreton F, Buffin R, Huissoud C, et al. Fetal thrombotic vasculopathy is associated with thromboembolic events and adverse perinatal outcome but not with neurologic complications: a retrospective cohort study of 54 cases with a 3-year follow-up of children. *Placenta*. 2014 Aug;35(8):611-7.
1987. Lepercq J, Coste J, Theau A, Dubois-Laforgue D, Timsit J. Factors associated with preterm delivery in women with type 1 diabetes: A cohort study. *Diabetes Care*. 2004 December;27(12):2824-8.
1988. Lepercq J, Le Meaux JP, Agman A, Timsit J. Factors associated with cesarean delivery in nulliparous women with type 1 diabetes. *Obstetrics and Gynecology*. 2010 May;115(5):1014-20.
1989. Leppalahti S, Gissler M, Mentula M, Heikinheimo O. Is teenage pregnancy an obstetric risk in a welfare society? A population-based study in Finland, from 2006 to 2011. *BMJ Open*. 2013;3(8).
1990. Lequier LL, Nikaidoh H, Leonard SR, Bokovoy JL, White ML, Scannon PJ, et al. Preoperative and postoperative endotoxemia in children with congenital heart disease. *Chest*. 2000 Jun;117(6):1706-12.
1991. Lerman TT, Weintraub AY, Sheiner E. Pregnancy outcomes in women with mitral valve prolapse and mitral valve regurgitation. *Archives of Gynecology and Obstetrics*. 2013 August;288(2):287-91.
1992. Letzner J, Berger F, Schwabe S, Benzing J, Morgenthaler NG, Bucher HU, et al. Plasma C-terminal pro-endothelin-1 and the natriuretic pro-peptides NT-proBNP and MR-proANP in very preterm infants with patent ductus arteriosus. *Neonatology*. 2012 February;101(2):116-24.
1993. Leung C, Saaïd R, Pedersen L, Park F, Poon L, Hyett J. Demographic factors that can be used to predict early-onset pre-eclampsia. *Journal of Maternal-Fetal and Neonatal Medicine*. 2014 01 Mar;28(5):535-9.
1994. Leung TY, Leung TN, Sahota DS, Chan OK, Chan LW, Fung TY, et al. Trends in maternal obesity and associated risks of adverse pregnancy outcomes in a population of Chinese women. *Bjog*. 2008 Nov;115(12):1529-37.
1995. Leung TY, Tam WH, Leung TN, Lok IH, Lau TK. Effect of twin-to-twin delivery interval on umbilical cord blood gas in the second twins. *BJOG: An International Journal of Obstetrics and Gynaecology*. 2002 January;109(1):63-7.
1996. Leung WC, Lam H, Lee CP, Lao TT. Doppler study of the umbilical and fetal middle cerebral

arteries in women with gestational diabetes mellitus. *Ultrasound Obstet Gynecol.* 2004 Oct;24(5):534-7.

1997. LeVan JM, Wyckoff MH, Ahn C, Heyne R, Sanchez PJ, Chalak L, et al. Change in care among nonenrolled patients during and after a randomized trial. *Pediatrics.* 2013 October;132(4):e960-e70.

1998. Leversen KT, Sommerfelt K, Ronnestad A, Kaaresen PI, Farstad T, Skranes J, et al. Prediction of neurodevelopmental and sensory outcome at 5 years in Norwegian children born extremely preterm. *Pediatrics.* 2011 Mar;127(3):e630-8.

1999. Levesque S, Moutquin JM, Lindsay C, Roy MC, Rousseau F. Implication of an AGT haplotype in a multigene association study with pregnancy hypertension. *Hypertension.* 2004 Jan;43(1):71-8.

2000. Levine LD, Gonzales GF, Tapia VL, Gasco M, Sammel MD, Srinivas SK, et al. Preterm birth risk at high altitude in Peru. *Am J Obstet Gynecol.* 2015 Feb;212(2):210.e1-8.

2001. Levine RJ, Qian C, Leshane ES, Yu KF, England LJ, Schisterman EF, et al. Two-stage elevation of cell-free fetal DNA in maternal sera before onset of preeclampsia. *Am J Obstet Gynecol.* 2004 Mar;190(3):707-13.

2002. Levine RJ, Vatten LJ, Horowitz GL, Qian C, Romundstad PR, Yu KF, et al. Pre-eclampsia, soluble fms-like tyrosine kinase 1, and the risk of reduced thyroid function: Nested case-control and population based study. *BMJ (Online).* 2009 22 Dec;339(7734):1355-8.

2003. Levron Y, Dviri M, Segol I, Yerushalmi GM, Hourvitz A, Orvieto R, et al. The 'immunologic theory' of preeclampsia revisited: a lesson from donor oocyte gestations. *Am J Obstet Gynecol.* 2014 Oct;211(4):383.e1-5.

2004. Lewandowski AJ, Augustine D, Lamata P, Davis EF, Lazdam M, Francis J, et al. Preterm heart in adult life: cardiovascular magnetic resonance reveals distinct differences in left ventricular mass, geometry, and function. *Circulation.* 2013 Jan 15;127(2):197-206.

2005. Lewis DF, McCann J, Wang Y, Cormier C, Groome L. Hospitalized late preterm mild preeclamptic patients with mature lung testing: what are the risks of delivery? *Journal of perinatology : official journal of the California Perinatal Association.* 2009 Jun;29(6):413-5.

2006. Li DK, Wi S. Changing paternity and the risk of preeclampsia/eclampsia in the subsequent pregnancy. *American journal of epidemiology.* 2000 Jan 1;151(1):57-62.

2007. Li G, Fan L, Zhang L, Zhang W, Huang X. Metabolic parameters and perinatal outcomes of gestational diabetes mellitus in women with polycystic ovary syndrome. *J Perinat Med.* 2010 Mar;38(2):141-6.

2008. Li LJ, Cheung CY, Ikram MK, Gluckman P, Meaney MJ, Chong YS, et al. Blood pressure and retinal microvascular characteristics during pregnancy: Growing Up in Singapore Towards Healthy Outcomes (GUSTO) Study. *Hypertension.* 2012 Jul;60(1):223-30.

2009. Li N, Ghosh G, Gudmundsson S. Uterine artery Doppler in high-risk pregnancies at 23-24 gestational weeks is of value in predicting adverse outcome of pregnancy and selecting cases for more intense surveillance. *Acta Obstet Gynecol Scand.* 2014 Dec;93(12):1276-81.

2010. Li R, Mitchell P, Dowling R, Yan B. Is hypertension predictive of clinical recurrence in posterior reversible encephalopathy syndrome? *Journal of clinical neuroscience : official journal of the Neurosurgical Society of Australasia.* 2013 Feb;20(2):248-52.

2011. Li XL, Chen TT, Dong X, Gou WL, Lau S, Stone P, et al. Early onset preeclampsia in subsequent pregnancies correlates with early onset preeclampsia in first pregnancy. *European journal of obstetrics, gynecology, and reproductive biology.* 2014 Jun;177:94-9.

2012. Li Y, Gor D, Walicki D, Jenny D, Jones D, Barbour P, et al. Spectrum and potential pathogenesis of reversible posterior leukoencephalopathy syndrome. *Journal of Stroke and Cerebrovascular Diseases.* 2012 November;21(8):873-82.

2013. Li Z, Ye R, Zhang L, Li H, Liu J, Ren A. Folic acid supplementation during early pregnancy and the risk of gestational hypertension and preeclampsia. *Hypertension.* 2013 Apr;61(4):873-9.

2014. Liang CC, Chang SD, Lai SL, Hsieh CC, Chueh HY, Lee TH. Stroke complicating pregnancy and the

puerperium. *European journal of neurology : the official journal of the European Federation of Neurological Societies*. 2006 Nov;13(11):1256-60.

2015. Libby G, Murphy DJ, McEwan NF, Greene SA, Forsyth JS, Chien PW, et al. Pre-eclampsia and the later development of type 2 diabetes in mothers and their children: an intergenerational study from the Walker cohort. *Diabetologia*. 2007 Mar;50(3):523-30.

2016. Lidegaard O, Skovlund CW, Mørch LS, Hedegaard M. Reduction in stillbirths at term after new birth induction paradigm: Results of a national intervention. *BMJ Open*. 2014;4(8).

2017. Lightstone L. Renal disease and pregnancy. *Medicine*. 2011 August;39(8):497-501.

2018. Lilliecreutz C, Sydsjö G, Josefsson A. Obstetric and perinatal outcomes among women with blood- and injection phobia during pregnancy. *Journal of Affective Disorders*. 2011 March;129(1-3):289-95.

2019. Lim CP, Sim DK. Peripartum cardiomyopathy: experience in an Asian tertiary centre. *Singapore Med J*. 2013 Jan;54(1):24-7.

2020. Lim WY, Chong M, Calder PC, Kwek K, Chong YS, Gluckman PD, et al. Relations of plasma polyunsaturated fatty acids with blood pressures during the 26th and 28th week of gestation in women of Chinese, Malay, and Indian Ethnicity. *Medicine (United States)*. 2015 07 Mar;94(9):e571.

2021. Lim WY, Saw SM, Tan KH, Yeo GS, Kwek KY. A cohort evaluation on arterial stiffness and hypertensive disorders in pregnancy. *BMC pregnancy and childbirth*. 2012;12:160.

2022. Lima FV, Parikh PB, Zhu J, Yang J, Stergiopoulos K. Association of cardiomyopathy with adverse cardiac events in pregnant women at the time of delivery. *JACC: Heart Failure*. 2015 01 Mar;3(3):257-66.

2023. Lima XT, Janakiraman V, Hughes MD, Kimball AB. The impact of psoriasis on pregnancy outcomes. *The Journal of investigative dermatology*. 2012 Jan;132(1):85-91.

2024. Liman TG, Bohner G, Heuschmann PU, Scheel M, Endres M, Siebert E. Clinical and radiological differences in posterior reversible encephalopathy syndrome between patients with preeclampsia-eclampsia and other predisposing diseases. *European journal of neurology : the official journal of the European Federation of Neurological Societies*. 2012 Jul;19(7):935-43.

2025. Limardo M, Imbasciati E, Ravani P, Surian M, Torres D, Gregorini G, et al. Pregnancy and progression of IgA nephropathy: Results of an Italian multicenter study. *American Journal of Kidney Diseases*. 2010 September;56(3):506-12.

2026. Lin SL, Leung GM, Schooling CM. Mode of delivery and adiposity: Hong Kong's "Children of 1997" birth cohort. *Annals of epidemiology*. 2013 November;23(11):693-9.

2027. Lin YH, Lo LM, Hsieh CC, Chiu TH, Hsieh TT, Hung TH. Perinatal outcome in normal pregnant women with incidental thrombocytopenia at delivery. *Taiwanese journal of obstetrics & gynecology*. 2013 Sep;52(3):347-50.

2028. Lin YS, Tang CH, Yang CY, Wu LS, Hung ST, Hwa HL, et al. Effect of pre-eclampsia-eclampsia on major cardiovascular events among peripartum women in Taiwan. *The American journal of cardiology*. 2011 Jan 15;107(2):325-30.

2029. Lin YS, Tang CH, Yang CY, Wu LS, Hung ST, Hwa HL, et al. Effect of pre-eclampsia-eclampsia on major cardiovascular events among peripartum women in taiwan. *American Journal of Cardiology*. 2011 15 Jan;107(2):325-30.

2030. Lindqvist PG, Bremme K, Hellgren M. Efficacy of obstetric thromboprophylaxis and long-term risk of recurrence of venous thromboembolism. *Acta Obstet Gynecol Scand*. 2011 Jun;90(6):648-53.

2031. Lindqvist PG, Happach C. Risk and risk estimation of placental abruption. *European journal of obstetrics, gynecology, and reproductive biology*. 2006 Jun 1;126(2):160-4.

2032. Lindqvist PG, Kublikas M, Dahlback B. Individual risk assessment of thrombosis in pregnancy. *Acta Obstet Gynecol Scand*. 2002 May;81(5):412-6.

2033. Lindqvist PG, Nasiell J, Gustafsson LL, Nordstrom L. Selective serotonin reuptake inhibitor use during pregnancy increases the risk of postpartum hemorrhage and anemia: A hospital-based cohort

- study. *Journal of Thrombosis and Haemostasis*. 2014 01 Dec;12(12):1986-92.
2034. Lindqvist PG, Olofsson P, Dahlback B. Use of selective factor V Leiden screening in pregnancy to identify candidates for anticoagulants. *Obstet Gynecol*. 2002 Aug;100(2):332-6.
2035. Lindqvist PG, Svensson P, Dahlback B. Activated protein C resistance -- in the absence of factor V Leiden -- and pregnancy. *Journal of thrombosis and haemostasis : JTH*. 2006 Feb;4(2):361-6.
2036. Lindqvist PG, Svensson P, Dahlback B. Activated protein C resistance - In the absence of factor V Leiden - And pregnancy. *Journal of Thrombosis and Haemostasis*. 2006 February;4(2):361-6.
2037. Lisonkova S, Sabr Y, Mayer C, Young C, Skoll A, Joseph KS. Maternal morbidity associated with early-onset and late-onset preeclampsia. *Obstet Gynecol*. 2014 Oct;124(4):771-81.
2038. Litos M, Sarris I, Bewley S, Seed P, Okpala I, Otegh-Ntim E. White blood cell count as a predictor of the severity of sickle cell disease during pregnancy. *European Journal of Obstetrics Gynecology and Reproductive Biology*. 2007 August;133(2):169-72.
2039. Little SE, Robinson JN, Puopolo KM, Mukhopadhyay S, Wilkins-Haug LE, Acker DA, et al. The effect of obstetric practice change to reduce early term delivery on perinatal outcome. *Journal of perinatology : official journal of the California Perinatal Association*. 2014 Mar;34(3):176-80.
2040. Liu CC, Pretorius DH, Scioscia AL, Hull AD. Sonographic prenatal diagnosis of marginal placental cord insertion: clinical importance. *J Ultrasound Med*. 2002 Jun;21(6):627-32.
2041. Liu CM, Chang SD, Cheng PJ. Comparison of referral and non-referral hypertensive disorders during pregnancy: an analysis of 271 consecutive cases at a tertiary hospital. *Chang Gung Med J*. 2005 May;28(5):326-34.
2042. Liu CM, Chang SD, Cheng PJ. Relationship between prenatal care and maternal complications in women with preeclampsia: implications for continuity and discontinuity of prenatal care. *Taiwanese journal of obstetrics & gynecology*. 2012 Dec;51(4):576-82.
2043. Liu CM, Cheng PJ, Chang SD. Maternal complications and perinatal outcomes associated with gestational hypertension and severe preeclampsia in Taiwanese women. *Journal of the Formosan Medical Association = Taiwan yi zhi*. 2008 Feb;107(2):129-38.
2044. Liu H, Huang TT, Lin JH. Risk factors and risk index of cardiac events in pregnant women with heart disease. *Chinese medical journal*. 2012 Oct;125(19):3410-5.
2045. Liu J, Zhao Y, Song Y, Zhang W, Bian X, Yang J, et al. Pregnancy in women with systemic lupus erythematosus: a retrospective study of 111 pregnancies in Chinese women. *The journal of maternal-fetal & neonatal medicine : the official journal of the European Association of Perinatal Medicine, the Federation of Asia and Oceania Perinatal Societies, the International Society of Perinatal Obstet*. 2012 Mar;25(3):261-6.
2046. Liu KC, Joseph JA, Nkole TB, Kaunda E, Stringer JSA, Chi BH, et al. Predictors and pregnancy outcomes associated with a newborn birth weight of 4000 g or more in Lusaka, Zambia. *International Journal of Gynecology and Obstetrics*. 2013 August;122(2):150-5.
2047. Liu S, Joseph KS, Liston RM, Bartholomew S, Walker M, Leon JA, et al. Incidence, risk factors, and associated complications of eclampsia. *Obstet Gynecol*. 2011 Nov;118(5):987-94.
2048. Liu S, Wen SW, Demissie K, Marcoux S, Kramer MS. Maternal asthma and pregnancy outcomes: a retrospective cohort study. *Am J Obstet Gynecol*. 2001 Jan;184(2):90-6.
2049. Liu X, Chen Y, Zhou Q, Shi H, Cheng WW. Utilization of International Association of Diabetes and Pregnancy Study Groups criteria vs. a two-step approach to screening for gestational diabetes mellitus in Chinese women with twin pregnancies. *Diabetic Medicine*. 2015 01 Mar;32(3):367-73.
2050. Liu X, Du J, Wang G, Chen Z, Wang W, Xi Q. Effect of pre-pregnancy body mass index on adverse pregnancy outcome in north of China. *Arch Gynecol Obstet*. 2011 Jan;283(1):65-70.
2051. Liu X, Gong Y, Jia J, Bai Y, Gui S, Wang T, et al. Plasma concentrations of sAxl are associated with severe preeclampsia. *Clin Biochem*. 2014 Feb;47(3):173-6.
2052. Liu X, Zhang W. Effect of maternal age on pregnancy: a retrospective cohort study. *Chinese*

- medical journal. 2014;127(12):2241-6.
2053. Liu Y, Hoyo C, Murphy S, Huang Z, Overcash F, Thompson J, et al. DNA methylation at imprint regulatory regions in preterm birth and infection. *Am J Obstet Gynecol.* 2013 May;208(5):395.e1-7.
2054. Liu Y, Ma X, Lv J, Shi S, Liu L, Chen Y, et al. Risk factors for pregnancy outcomes in patients with IgA nephropathy: a matched cohort study. *American journal of kidney diseases : the official journal of the National Kidney Foundation.* 2014 Nov;64(5):730-6.
2055. Livingston JC, Barton JR, Park V, Haddad B, Phillips O, Sibai BM. Maternal and fetal inherited thrombophilias are not related to the development of severe preeclampsia. *Am J Obstet Gynecol.* 2001 Jul;185(1):153-7.
2056. Livingston JC, Park V, Barton JR, Elfering S, Haddad B, Mabie WC, et al. Lack of association of severe preeclampsia with maternal and fetal mutant alleles for tumor necrosis factor alpha and lymphotoxin alpha genes and plasma tumor necrosis factor alpha levels. *Am J Obstet Gynecol.* 2001 May;184(6):1273-7.
2057. Livingston JR, Payne B, Brown M, Roberts JM, Cote AM, Magee LA, et al. Uric Acid as a predictor of adverse maternal and perinatal outcomes in women hospitalized with preeclampsia. *Journal of obstetrics and gynaecology Canada : JOGC = Journal d'obstetrique et gynecologie du Canada : JOGC.* 2014 Oct;36(10):870-7.
2058. Llurba E, Casals E, Dominguez C, Delgado J, Mercade I, Crispi F, et al. Atherogenic lipoprotein subfraction profile in preeclamptic women with and without high triglycerides: Different pathophysiologic subsets in preeclampsia. *Metabolism: Clinical and Experimental.* 2005 November;54(11):1504-9.
2059. Llurba E, Sanchez O, Dominguez C, Soro G, Goya M, Alijotas-Reig J, et al. Smoking during pregnancy: changes in mid-gestation angiogenic factors in women at risk of developing preeclampsia according to uterine artery Doppler findings. *Hypertension in pregnancy.* 2013;32(1):50-9.
2060. Locatelli A, Ghidini A, Assi F, Andreani M, Malguzzi S, Paterlini G. Which factors affect the occurrence of severe cerebral lesions in preterm neonates who are born with intrauterine infection? *American Journal of Obstetrics and Gynecology.* 2008 October;199(4):404.e1-.e5.
2061. Locatelli A, Incerti M, Ghidini A, Greco M, Villa E, Paterlini G. Factors associated with umbilical artery acidemia in term infants with low Apgar scores at 5 min. *European journal of obstetrics, gynecology, and reproductive biology.* 2008 Aug;139(2):146-50.
2062. Locatelli A, Incerti M, Paterlini G, Doria V, Consonni S, Provero C, et al. Antepartum and intrapartum risk factors for neonatal encephalopathy at term. *American Journal of Perinatology.* 2010;27(8):649-54.
2063. Lockshin MD, Kim M, Laskin CA, Guerra M, Branch DW, Merrill J, et al. Prediction of adverse pregnancy outcome by the presence of lupus anticoagulant, but not anticardiolipin antibody, in patients with antiphospholipid antibodies. *Arthritis and Rheumatism.* 2012 July;64(7):2311-8.
2064. Loeffler LF, Navas-Acien A, Brady TM, Miller ER, 3rd, Fadrowski JJ. Uric acid level and elevated blood pressure in US adolescents: National Health and Nutrition Examination Survey, 1999-2006. *Hypertension.* 2012 Apr;59(4):811-7.
2065. Logie JJ, Denison FC, Riley SC, Ramaesh T, Forbes S, Norman JE, et al. Evaluation of kisspeptin levels in obese pregnancy as a biomarker for pre-eclampsia. *Clin Endocrinol (Oxf).* 2012 Jun;76(6):887-93.
2066. Loi K, Khoo CK, Tan KH, Yeo GS, Kwek K. A review of 93 cases of severe preeclampsia in Singapore: are there risk factors for complications? *Singapore Med J.* 2007 Sep;48(9):808-12.
2067. Lokki AI, Aalto-Viljakainen T, Meri S, Laivuori H. Genetic analysis of membrane cofactor protein (CD46) of the complement system in women with and without preeclamptic pregnancies. *PLoS one.* 2015 24 Feb;10(2).
2068. Longo-Mbenza B, Tshimanga KB, Buassa-bu-Tsumbu B, Kabangu MJ. Diets rich in vegetables and



physical activity are associated with a decreased risk of pregnancy induced hypertension among rural women from Kimpese, DR Congo. *Niger J Med.* 2008 Jul-Aug;17(3):265-9.

2069. Lopez ES, Rodriguez EM, Navarro CR, Sanchez-Luna M. Initial respiratory management in preterm infants and bronchopulmonary dysplasia. *Clinics.* 2011;66(5):823-7.

2070. Lopez V, Martinez D, Vinolo C, Cabello M, Sola E, Gutierrez C, et al. Pregnancy in kidney transplant recipients: effects on mother and newborn. *Transplant Proc.* 2011 Jul-Aug;43(6):2177-8.

2071. Lopez-Pulles R, Gonzalez-Andrade F, Duran-Rodas M, Ayala J, Carrillo R, Buitron LR, et al. Assessment of genetic contributions to risk of preeclampsia in Ecuadorian women. *Hypertension in pregnancy.* 2010;29(4):410-8.

2072. Lopez-Quesada E, Antonia Vilaseca M, Gomez E, Laila JM. Are plasma total homocysteine and other amino acids associated with glucose intolerance in uncomplicated pregnancies and preeclampsia? *European journal of obstetrics, gynecology, and reproductive biology.* 2005 Mar 1;119(1):36-41.

2073. Lopez-Quesada E, Vilaseca MA, Vela A, Laila JM. Perinatal outcome prediction by maternal homocysteine and uterine artery Doppler velocimetry. *European Journal of Obstetrics Gynecology and Reproductive Biology.* 2004 15 Mar;113(1):61-6.

2074. Lortlar N, Kilic S, Bardakci Y, Budak G, Omeroglu S. Immunohistochemical evaluation of pecam-1 (CD-31) and icam-3 (CD-50) in preeclamptic placenta. *Turkiye Klinikleri Journal of Medical Sciences.* 2009;29(5):1131-6.

2075. Loset M, Johnson MP, Melton PE, Ang W, Huang RC, Mori TA, et al. Preeclampsia and cardiovascular disease share genetic risk factors on chromosome 2q22. *Pregnancy Hypertension.* 2014 April;4(2):178-85.

2076. Louis J, Auckley D, Miladinovic B, Shepherd A, Mencin P, Kumar D, et al. Perinatal outcomes associated with obstructive sleep apnea in obese pregnant women. *Obstet Gynecol.* 2012 Nov;120(5):1085-92.

2077. Louis JM, Auckley D, Sokol RJ, Mercer BM. Maternal and neonatal morbidities associated with obstructive sleep apnea complicating pregnancy. *Am J Obstet Gynecol.* 2010 Mar;202(3):261.e1-5.

2078. Louis JM, Mogos MF, Salemi JL, Redline S, Salihu HM. Obstructive sleep apnea and severe maternal-infant morbidity/mortality in the United States, 1998-2009. *Sleep.* 2014 May;37(5):843-9.

2079. Loukovaara S, Immonen I, Teramo KA, Kaaja R. Progression of retinopathy during pregnancy in type 1 diabetic women treated with insulin lispro. *Diabetes Care.* 2003 01 Apr;26(4):1193-8.

2080. Loustau V, Debouverie O, Canoui-Poitrine F, Baili L, Khellaf M, Touboul C, et al. Effect of pregnancy on the course of immune thrombocytopenia: A retrospective study of 118 pregnancies in 82 women. *British Journal of Haematology.* 2014 September;166(6):929-35.

2081. Love ER, Bhattacharya S, Smith NC, Bhattacharya S. Effect of interpregnancy interval on outcomes of pregnancy after miscarriage: retrospective analysis of hospital episode statistics in Scotland. *Bmj.* 2010;341:c3967.

2082. Love ER, Crum J, Bhattacharya S. Independent effects of pregnancy induced hypertension on childhood development: a retrospective cohort study. *European journal of obstetrics, gynecology, and reproductive biology.* 2012 Dec;165(2):219-24.

2083. Loverro G, Pansini V, Greco P, Vimercati A, Parisi AM, Selvaggi L. Indications and outcome for intensive care unit admission during puerperium. *Arch Gynecol Obstet.* 2001 Nov;265(4):195-8.

2084. Lowit A, Bhattacharya S. Obstetric performance following an induced abortion. *Best Practice and Research: Clinical Obstetrics and Gynaecology.* 2010 October;24(5):667-82.

2085. Lu J, Zhao YY, Qiao J, Zhang HJ, Ge L, Wei Y. A follow-up study of women with a history of severe preeclampsia: relationship between metabolic syndrome and preeclampsia. *Chinese medical journal.* 2011 Mar;124(5):775-9.

2086. Lu MC, Kotelchuck M, Culhane JF, Hobel CJ, Klerman LV, Thorp Jr JM. Preconception care between pregnancies: The content of internatal care. *Maternal and Child Health Journal.* 2006

September;10(SUPPL. 7):107-22.

2087. Lucovnik M, Tul N, Verdenik I, Blickstein I. Perinatal outcomes in singleton and twin pregnancies following first-trimester bleeding. *Journal of Perinatology*. 2014 September;34(9):673-6.
2088. Luders C, Castro MC, Titan SM, De Castro I, Elias RM, Abensur H, et al. Obstetric outcome in pregnant women on long-term dialysis: a case series. *American journal of kidney diseases : the official journal of the National Kidney Foundation*. 2010 Jul;56(1):77-85.
2089. Ludwig M, Katalinic A. Pregnancy course and health of children born after ICSI depending on parameters of male factor infertility. *Human reproduction*. 2003 Feb;18(2):351-7.
2090. Luengmettakul J, Boriboonhirunsam D, Sutantawibul A, Sunsaneevithayakul P. Incidence of large-for-gestational age newborn: a comparison between pregnant women with abnormal and normal screening test for gestational diabetes. *Journal of the Medical Association of Thailand = Chotmaihet thangphaet*. 2007 Mar;90(3):432-6.
2091. Luewan S, Srisupundit K, Tongsong T. Outcomes of pregnancies complicated by beta-thalassemia/hemoglobin E disease. *International Journal of Gynecology and Obstetrics*. 2009 March;104(3):203-5.
2092. Luke B, Brown MB, Misiunas R, Anderson E, Nugent C, van de Ven C, et al. Specialized prenatal care and maternal and infant outcomes in twin pregnancy. *Am J Obstet Gynecol*. 2003 Oct;189(4):934-8.
2093. Luke B, Brown MB, Nugent C, Gonzalez-Quintero VH, Witter FR, Newman RB. Risk factors for adverse outcomes in spontaneous versus assisted conception twin pregnancies. *Fertility and sterility*. 2004 Feb;81(2):315-9.
2094. Lumbanraja SN. Determining the maternal characteristics that predicts the adverse outcomes for patients with preeclampsia. *Journal of Health and Translational Medicine*. 2013;16(1):1-6.
2095. Luo L, Chen D, Qu Y, Wu J, Li X, Mu D. Association between hypoxia and perinatal arterial ischemic stroke: A meta-analysis. *PloS one*. 2014 28 Feb;9(2).
2096. Luo ZC, An N, Xu HR, Larante A, Audibert F, Fraser WD. The effects and mechanisms of primiparity on the risk of pre-eclampsia: a systematic review. *Paediatric and perinatal epidemiology*. 2007 Jul;21 Suppl 1:36-45.
2097. Luo ZC, Julien P, Wei SQ, Audibert F, Smith GN, Fraser WD. Plasma cotinine indicates an increased risk of preeclampsia in previous and passive smokers. *Am J Obstet Gynecol*. 2014 Mar;210(3):232.e1-5.
2098. Lupton SJ, Chiu CL, Hodgson LA, Tooher J, Ogle R, Wong TY, et al. Changes in retinal microvascular caliber precede the clinical onset of preeclampsia. *Hypertension*. 2013 Nov;62(5):899-904.
2099. Lurie S, Weissler A, Baider C, Hiaev Z, Sadan O, Glezerman M. Male fetuses and the risk of cesarean delivery. *The Journal of reproductive medicine*. 2004 May;49(5):353-6.
2100. Luyckx VA, Bertram JF, Brenner BM, Fall C, Hoy WE, Ozanne SE, et al. Effect of fetal and child health on kidney development and long-term risk of hypertension and kidney disease. *The Lancet*. 2013;382(9888):273-83.
2101. Lyall K, Pauls DL, Spiegelman D, Ascherio A, Santangelo SL. Pregnancy complications and obstetric suboptimality in association with autism spectrum disorders in children of the nurses' health study II. *Autism Research*. 2012 February;5(1):21-30.
2102. Lydakis C, Beevers M, Beevers DG, Lip GY. The prevalence of pre-eclampsia and obstetric outcome in pregnancies of normotensive and hypertensive women attending a hospital specialist clinic. *Int J Clin Pract*. 2001 Jul-Aug;55(6):361-7.
2103. Lydon-Rochelle M, Holt VL, Easterling TR, Martin DP. Cesarean delivery and postpartum mortality among primiparas in Washington State, 1987-1996(1). *Obstet Gynecol*. 2001 Feb;97(2):169-74.
2104. Lydon-Rochelle M, Holt VL, Easterling TR, Martin DP. Cesarean delivery and postpartum mortality among primiparas in Washington State, 1987-1996. *Obstetrics and Gynecology*. 2001;97(2):169-74.

2105. Lykke JA, Bare LA, Olsen J, Lagier R, Arellano AR, Tong C, et al. Thrombophilias and adverse pregnancy outcomes: results from the Danish National Birth Cohort. *Journal of thrombosis and haemostasis : JTH*. 2012 Jul;10(7):1320-5.
2106. Lykke JA, Bare LA, Olsen J, Lagier R, Tong C, Arellano A, et al. Vascular associated gene variants in patients with preeclampsia: results from the Danish National Birth Cohort. *Acta Obstet Gynecol Scand*. 2012 Sep;91(9):1053-60.
2107. Lykke JA, Langhoff-Roos J, Lockwood CJ, Triche EW, Paidas MJ. Mortality of mothers from cardiovascular and non-cardiovascular causes following pregnancy complications in first delivery. *Paediatric and perinatal epidemiology*. 2010 Jul 1;24(4):323-30.
2108. Lykke JA, Langhoff-Roos J, Sibai BM, Funai EF, Triche EW, Paidas MJ. Hypertensive pregnancy disorders and subsequent cardiovascular morbidity and type 2 diabetes mellitus in the mother. *Hypertension*. 2009 Jun;53(6):944-51.
2109. Lykke JA, Paidas MJ, Damm P, Triche EW, Kuczynski E, Langhoff-Roos J. Preterm delivery and risk of subsequent cardiovascular morbidity and type-II diabetes in the mother. *BJOG: An International Journal of Obstetrics and Gynaecology*. 2010 February;117(3):274-81.
2110. Lykke JA, Paidas MJ, Langhoff-Roos J. Recurring complications in second pregnancy. *Obstet Gynecol*. 2009 Jun;113(6):1217-24.
2111. Lynch A, McDuffie R, Jr., Murphy J, Faber K, Orleans M. Preeclampsia in multiple gestation: the role of assisted reproductive technologies. *Obstet Gynecol*. 2002 Mar;99(3):445-51.
2112. Lynch AM, Eckel RH, Murphy JR, Gibbs RS, West NA, Giclas PC, et al. Prepregnancy obesity and complement system activation in early pregnancy and the subsequent development of preeclampsia. *Am J Obstet Gynecol*. 2012 May;206(5):428.e1-8.
2113. Lynch AM, Gibbs RS, Murphy JR, Giclas PC, Salmon JE, Holers VM. Early elevations of the complement activation fragment C3a and adverse pregnancy outcomes. *Obstet Gynecol*. 2011 Jan;117(1):75-83.
2114. Lynch AM, Murphy JR, Byers T, Gibbs RS, Neville MC, Giclas PC, et al. Alternative complement pathway activation fragment Bb in early pregnancy as a predictor of preeclampsia. *Am J Obstet Gynecol*. 2008 Apr;198(4):385.e1-9.
2115. Lynch AM, Murphy JR, Gibbs RS, Levine RJ, Giclas PC, Salmon JE, et al. The interrelationship of complement-activation fragments and angiogenesis-related factors in early pregnancy and their association with pre-eclampsia. *Bjog*. 2010 Mar;117(4):456-62.
2116. Lynch AM, Salmon JE. Dysregulated Complement Activation as a Common Pathway of Injury in Preeclampsia and Other Pregnancy Complications. *Placenta*. 2010 July;31(7):561-7.
2117. Ma H, Henderson KD, Sullivan-Halley J, Duan L, Marshall SF, Ursin G, et al. Pregnancy-related factors and the risk of breast carcinoma in situ and invasive breast cancer among postmenopausal women in the California Teachers Study cohort. *Breast Cancer Research*. 2010 18 Jun;12(3).
2118. Ma RM, Lao TT. Maternal mean arterial pressure and oral glucose tolerance test results. Relationship in normotensive women. *The Journal of reproductive medicine*. 2001 Aug;46(8):747-51.
2119. Ma slovit S, Kupfermanc MJ, Lessing JB, Many A. Perinatal outcome among non-residents in Israel. *Israel Medical Association Journal*. 2005 May;7(5):315-9.
2120. Macdonald EM, Natale R, Regnault TR, Koval JJ, Campbell MK. Obstetric conditions and the placental weight ratio. *Placenta*. 2014 Aug;35(8):582-6.
2121. MacDonald SE, Walker M, Ramshaw H, Godwin M, Chen XK, Smith G. Hypertensive disorders of pregnancy and long-term risk of hypertension: what do Ontario prenatal care providers know, and what do they communicate? *Journal of obstetrics and gynaecology Canada : JOGC = Journal d'obstetrique et gynecologie du Canada : JOGC*. 2007 Sep;29(9):705-10.
2122. Macdonald-Wallis C, Lawlor DA, Fraser A, May M, Nelson SM, Tilling K. Blood pressure change in normotensive, gestational hypertensive, preeclamptic, and essential hypertensive pregnancies.

Hypertension. 2012 Jun;59(6):1241-8.

2123. Macdonald-Wallis C, Lawlor DA, Heron J, Fraser A, Nelson SM, Tilling K. Relationships of risk factors for pre-eclampsia with patterns of occurrence of isolated gestational proteinuria during normal term pregnancy. *PloS one*. 2011;6(7):e22115.

2124. Macdonald-Wallis C, Tilling K, Fraser A, Nelson SM, Lawlor DA. Established preeclampsia risk factors are related to patterns of blood pressure change in normal term pregnancy: findings from the Avon Longitudinal Study of Parents and Children. *J Hypertens*. 2011 Sep;29(9):1703-11.

2125. Macdonald-Wallis C, Tilling K, Fraser A, Nelson SM, Lawlor DA. Gestational weight gain as a risk factor for hypertensive disorders of pregnancy. *Am J Obstet Gynecol*. 2013 Oct;209(4):327.e1-17.

2126. Machado BM, Cardoso DM, de Paulis M, Escobar AM, Gilio AE. Fever without source: evaluation of a guideline. *J Pediatr (Rio J)*. 2009 Sep-Oct;85(5):426-32.

2127. Machado ES, Krauss MR, Megazzini K, Coutinho CM, Kreitchmann R, Melo VH, et al. Hypertension, preeclampsia and eclampsia among HIV-infected pregnant women from Latin America and Caribbean countries. *The Journal of infection*. 2014 Jun;68(6):572-80.

2128. Mackenzie RM, Sandrim VC, Carty DM, McClure JD, Freeman DJ, Dominiczak AF, et al. Endothelial FOS expression and pre-eclampsia. *Bjog*. 2012 Dec;119(13):1564-71.

2129. Madan I, Romero R, Kusanovic JP, Mittal P, Chaiworapongsa T, Dong Z, et al. The frequency and clinical significance of intra-amniotic infection and/or inflammation in women with placenta previa and vaginal bleeding: an unexpected observation. *J Perinat Med*. 2010 May;38(3):275-9.

2130. Madan J, Chen M, Goodman E, Davis J, Allan W, Dammann O. Maternal obesity, gestational hypertension, and preterm delivery. *The journal of maternal-fetal & neonatal medicine : the official journal of the European Association of Perinatal Medicine, the Federation of Asia and Oceania Perinatal Societies, the International Society of Perinatal Obstet*. 2010 Jan;23(1):82-8.

2131. Madazli R, Aydin S, Uludag S, Vildan O, Tolun N. Maternal plasma levels of cytokines in normal and preeclamptic pregnancies and their relationship with diastolic blood pressure and fibronectin levels. *Acta Obstetrica et Gynecologica Scandinavica*. 2003 01 Sep;82(9):797-802.

2132. Madazli R, Bulut B, Erenel H, Gezer A, Guralp O. Systemic lupus erythematosus and pregnancy. *Journal of obstetrics and gynaecology : the journal of the Institute of Obstetrics and Gynaecology*. 2010 Jan;30(1):17-20.

2133. Madazli R, Yuksel MA, Oncul M, Imamoglu M, Yilmaz H. Obstetric outcomes and prognostic factors of lupus pregnancies. *Arch Gynecol Obstet*. 2014 Jan;289(1):49-53.

2134. Maeda M, Tsukahara H, Terada H, Nakaji S, Nakamura H, Oba H, et al. Reversible splenic lesion with restricted diffusion in a wide spectrum of diseases and conditions. *Journal of neuroradiology Journal de neuroradiologie*. 2006 Oct;33(4):229-36.

2135. Magee LA, Miremadi S, Li J, Cheng C, Ensom MH, Carleton B, et al. Therapy with both magnesium sulfate and nifedipine does not increase the risk of serious magnesium-related maternal side effects in women with preeclampsia. *Am J Obstet Gynecol*. 2005 Jul;193(1):153-63.

2136. Magee LA, Namouz-Haddad S, Cao V, Koren G, Von Dadelszen P. Labetalol for hypertension in pregnancy. *Expert Opinion on Drug Safety*. 2015 01 Mar;14(3):453-61.

2137. Magee LA, von Dadelszen P, Bohun CM, Rey E, El-Zibdeh M, Stalker S, et al. Serious perinatal complications of non-proteinuric hypertension: an international, multicentre, retrospective cohort study. *Journal of obstetrics and gynaecology Canada : JOGC = Journal d'obstetrique et gynecologie du Canada : JOGC*. 2003 May;25(5):372-82.

2138. Magee LA, von Dadelszen P, Darley J, Beguin Y. Erythropoiesis and renal transplant pregnancy. *Clin Transplant*. 2000 Apr;14(2):127-35.

2139. Magnus P, Trogstad L. Pre-eclampsia research in the Norwegian mother and child cohort study. *Norsk Epidemiologi*. 2014;24(1-2):97-102.

2140. Magnus P, Trogstad L, Owe KM, Olsen SF, Nystad W. Recreational physical activity and the risk of

- preeclampsia: A prospective cohort of Norwegian women. *American journal of epidemiology*. 2008 October;168(8):952-7.
2141. Magnussen EB, Vatten LJ, Lund-Nilsen TI, Salvesen KA, Davey Smith G, Romundstad PR. Prepregnancy cardiovascular risk factors as predictors of pre-eclampsia: population based cohort study. *Bmj*. 2007 Nov 10;335(7627):978.
2142. Magnussen EB, Vatten LJ, Smith GD, Romundstad PR. Hypertensive disorders in pregnancy and subsequently measured cardiovascular risk factors. *Obstet Gynecol*. 2009 Nov;114(5):961-70.
2143. Mahaba HM, Ismail NA, El Damaty SI, Kamel HA. Pre-eclampsia: epidemiology and outcome of 995 cases. *J Egypt Public Health Assoc*. 2001;76(5-6):357-68.
2144. Mahajan NN, Thomas A, Soni RN, Gaikwad NL, Jain SM. 'Padhar regime' - a low-dose magnesium sulphate treatment for eclampsia. *Gynecol Obstet Invest*. 2009;67(1):20-4.
2145. Mahande MJ, Daltveit AK, Mmbaga BT, Masenga G, Obure J, Manongi R, et al. Recurrence of preeclampsia in northern Tanzania: a registry-based cohort study. *PloS one*. 2013;8(11):e79116.
2146. Mahande MJ, Daltveit AK, Mmbaga BT, Obure J, Masenga G, Manongi R, et al. Recurrence of perinatal death in Northern Tanzania: a registry based cohort study. *BMC pregnancy and childbirth*. 2013;13:166.
2147. Mahendru AA, Everett TR, McEniery CM, Wilkinson IB, Lees CC. The feasibility of prospectively studying maternal cardiovascular changes from before conception. *Hypertension research : official journal of the Japanese Society of Hypertension*. 2013 Aug;36(8):698-704.
2148. Mahendru AA, Everett TR, McEniery CM, Wilkinson IB, Lees CC. Cardiovascular function in women with recurrent miscarriage, pre-eclampsia and/or intrauterine growth restriction. *The journal of maternal-fetal & neonatal medicine : the official journal of the European Association of Perinatal Medicine, the Federation of Asia and Oceania Perinatal Societies, the International Society of Perinatal Obstet*. 2013 Mar;26(4):351-6.
2149. Mahomed K, Williams MA, Woelk GB, Mudzamiri S, Madzime S, King IB, et al. Leukocyte selenium, zinc and copper concentration in preeclamptic and normotensive pregnant women. *Biological Trace Element Research*. 2000;75(1-3):107-15.
2150. Mahony R, McKeating A, Murphy T, McAuliffe F, O'Herlihy C, Foley M. Appropriate antenatal corticosteroid use in women at risk for preterm birth before 34 weeks of gestation. *BJOG: An International Journal of Obstetrics and Gynaecology*. 2010 July;117(8):963-7.
2151. Maignien C, Nguyen A, Dussaux C, Cynober E, Gonzales M, Carbonne B. Outcome of pregnancy following second- or third-trimester intrauterine fetal death. *International Journal of Gynecology and Obstetrics*. 2014 01 Dec;127(3):275-8.
2152. Mairiga AG, Saleh W. Maternal mortality at the State Specialist Hospital Bauchi, Northern Nigeria. *East Afr Med J*. 2009 Jan;86(1):25-30.
2153. Majander KK, Villa PM, Kivinen K, Kere J, Laivuori H. A follow-up linkage study of Finnish pre-eclampsia families identifies a new fetal susceptibility locus on chromosome 18. *European journal of human genetics : EJHG*. 2013 Sep;21(9):1024-6.
2154. Makedos G, Papanicolaou A, Hitoglou A, Kalogiannidis I, Makedos A, Vrazioti V, et al. Homocysteine, folic acid and B12 serum levels in pregnancy complicated with preeclampsia. *Arch Gynecol Obstet*. 2007 Feb;275(2):121-4.
2155. Makhoulf MA, Clifton RG, Roberts JM, Myatt L, Hauth JC, Leveno KJ, et al. Adverse pregnancy outcomes among women with prior spontaneous or induced abortions. *American Journal of Perinatology*. 2014 October;31(9):765-72.
2156. Makhoul IR, Zmora O, Tamir A, Shahar E, Sujov P. Congenital subependymal pseudocysts: own data and meta-analysis of the literature. *The Israel Medical Association journal : IMAJ*. 2001 Mar;3(3):178-83.
2157. Makikallio K, Kaukola T, Tuimala J, S FK, Hallman M, Ojaniemi M. Umbilical artery chemokine

- CCL16 is associated with preterm preeclampsia and fetal growth restriction. *Cytokine*. 2012 Nov;60(2):377-84.
2158. Makinde ON, Adegoke OA, Adediran IA, Ndububa DA, Adeyemi AB, Owolabi AT, et al. HELLP syndrome: the experience at Ile-Ife, Nigeria. *Journal of obstetrics and gynaecology : the journal of the Institute of Obstetrics and Gynaecology*. 2009 Apr;29(3):195-9.
2159. Makkonen N, Heinonen S, Hiltunen M, Helisalmi S, Mannermaa A, Kirkinen P. Apolipoprotein E alleles in women with pre-eclampsia. *J Clin Pathol*. 2001 Aug;54(8):652-4.
2160. Makkonen N, Heinonen S, Kirkinen P. Obstetric prognosis in second pregnancy after preeclampsia in first pregnancy. *Hypertension in pregnancy*. 2000;19(2):173-81.
2161. Malchau SS, Loft A, Larsen EC, Aaris Henningsen AK, Rasmussen S, Andersen AN, et al. Perinatal outcomes in 375 children born after oocyte donation: a Danish national cohort study. *Fertility and sterility*. 2013 May;99(6):1637-43.
2162. Malek-Khosravi S, Kaboudi B. Insulin changes in preeclamptic women during pregnancy. *Annals of Saudi Medicine*. 2004 November/December;24(6):434-6.
2163. Malek-Mellouli M, Youssef A, Amara FB, Nasr M, Neji K, Bouchnack M, et al. Safety of Magnesium sulfate in severe preeclampsia  
Sulfate de magnesium au cours de la preeclampsie severe: Innocuite d'utilisation? *Tunisie Medicale*. 2012 July;90(7):552-6.
2164. Malmqvist E, Jakobsson K, Tinnerberg H, Rignell-Hydbom A, Rylander L. Gestational diabetes and preeclampsia in association with air pollution at levels below current air quality guidelines. *Environ Health Perspect*. 2013 Apr;121(4):488-93.
2165. Mamas M, Dunn WB, Neyses L, Goodacre R. The role of metabolites and metabolomics in clinically applicable biomarkers of disease. *Archives of Toxicology*. 2011 January;85(1):5-17.
2166. Mamun AA, Callaway LK, O'Callaghan MJ, Williams GM, Najman JM, Alati R, et al. Associations of maternal pre-pregnancy obesity and excess pregnancy weight gains with adverse pregnancy outcomes and length of hospital stay. *BMC pregnancy and childbirth*. 2011;11:62.
2167. Mamun AA, Kinarivala MK, O'Callaghan M, Williams G, Najman J, Callaway L. Does hypertensive disorder of pregnancy predict offspring blood pressure at 21 years? Evidence from a birth cohort study. *Journal of human hypertension*. 2012 May;26(5):288-94.
2168. Mandal D, Manda S, Rakshi A, Dey RP, Biswas SC, Banerjee A. Maternal obesity and pregnancy outcome: a prospective analysis. *J Assoc Physicians India*. 2011 Aug;59:486-9.
2169. Mandal D, Mandal S, Dattaray C, Banerjee D, Ghosh P, Ghosh A, et al. Takayasu arteritis in pregnancy: an analysis from eastern India. *Arch Gynecol Obstet*. 2012 Mar;285(3):567-71.
2170. Mankad K, Hoey E, Yap KS. Reversible Leukoencephalopathy Syndrome. *American Journal of Emergency Medicine*. 2010 March;28(3):386.e3-.e5.
2171. Mann JR, McDermott S. Maternal pre-eclampsia is associated with childhood epilepsy in South Carolina children insured by Medicaid. *Epilepsy & behavior : E&B*. 2011 Mar;20(3):506-11.
2172. Mann JR, McDermott S. Are maternal genitourinary infection and pre-eclampsia associated with ADHD in school-aged children? *J Atten Disord*. 2011 Nov;15(8):667-73.
2173. Mann JR, McDermott S, Gregg A, Gill TJ. Maternal genitourinary infection and small for gestational age. *Am J Perinatol*. 2009 Oct;26(9):667-72.
2174. Mann JR, McDermott S, Griffith MI, Hardin J, Gregg A. Uncovering the complex relationship between pre-eclampsia, preterm birth and cerebral palsy. *Paediatric and perinatal epidemiology*. 2011 Mar;25(2):100-10.
2175. Mannan MA, Jahan N, Dey SK, Uddin MF, Ahmed S. Maternal and foetal risk factor and complication with immediate outcome during hospital stay of very low birth weight babies. *Mymensingh medical journal : MMJ*. 2012 Oct;21(4):639-47.
2176. Mannisto T, Ananth Karumanchi S, Pouta A, Vaarasmaki M, Mendola P, Miettola S, et al.

- Preeclampsia, gestational hypertension and subsequent hypothyroidism. *Pregnancy Hypertension*. 2013 January;3(1):21-7.
2177. Mannisto T, Mendola P, Grewal J, Xie Y, Chen Z, Laughon SK. Thyroid diseases and adverse pregnancy outcomes in a contemporary US cohort. *The Journal of clinical endocrinology and metabolism*. 2013 Jul;98(7):2725-33.
2178. Mannisto T, Mendola P, Vaarasmaki M, Jarvelin MR, Hartikainen AL, Pouta A, et al. Elevated blood pressure in pregnancy and subsequent chronic disease risk. *Circulation*. 2013 Feb 12;127(6):681-90.
2179. Mannisto T, Vaarasmaki M, Pouta A, Hartikainen AL, Ruukonen A, Surcel HM, et al. Thyroid dysfunction and autoantibodies during pregnancy as predictive factors of pregnancy complications and maternal morbidity in later life. *The Journal of clinical endocrinology and metabolism*. 2010 Mar;95(3):1084-94.
2180. Mansour E, Eissa AN, Nofal LM, Kharboush I, Wagida A, Sallam I. Incidence and factors leading to low birth weight in Egypt. *International Pediatrics*. 2002;17(4):223-30.
2181. Manten GTR, Franx A, Van Der Hoek YY, Hameeteman TM, Voorbij HAM, Smolders HC, et al. Changes of plasma lipoprotein(a) during and after normal pregnancy in Caucasians. *Journal of Maternal-Fetal and Neonatal Medicine*. 2003 01 Aug;14(2):91-5.
2182. Manuck T, Branch DW, Lai Y, Sibai B, Spong CY, Wendel G, Jr., et al. Antiphospholipid antibodies and pregnancy outcomes in women heterozygous for factor V Leiden. *J Reprod Immunol*. 2010 Jun;85(2):180-5.
2183. Many A, Fattal A, Leitner Y, Kupferminc MJ, Harel S, Jaffa A. Neurodevelopmental and cognitive assessment of children born growth restricted to mothers with and without preeclampsia. *Hypertension in pregnancy*. 2003;22(1):25-9.
2184. Marano E, Scuteri N, Vacca G, Orefice G. HELLP syndrome with reversible posterior leukoencephalopathy. *Neurological sciences : official journal of the Italian Neurological Society and of the Italian Society of Clinical Neurophysiology*. 2003 Jun;24(2):82-4.
2185. Maresh MJ, Holmes VA, Patterson CC, Young IS, Pearson DW, Walker JD, et al. Glycemic targets in the second and third trimester of pregnancy for women with type 1 diabetes. *Diabetes Care*. 2015 Jan;38(1):34-42.
2186. Margarit LM, Griffiths A, Tsapanos V, Decavalas G, Gumenos D. Second trimester amniotic fluid endothelin concentration. A possible predictor for pre-eclampsia. *Journal of Obstetrics and Gynaecology*. 2005 January;25(1):18-9.
2187. Margoles HR, Gomez-Lobo V, Veis JH, Sherman MJ, Moore Jr J. Successful maternal and fetal outcome in a kidney transplant patient with everolimus exposure throughout pregnancy: A case report. *Transplantation Proceedings*. 2014 January-February;46(1):281-3.
2188. Maric NP, Dunjic B, Stojiljkovic DJ, Britvic D, Jasovic-Gasic M. Prenatal stress during the 1999 bombing associated with lower birth weight-A study of 3,815 births from Belgrade. *Archives of Women's Mental Health*. 2010 February;13(1):83-9.
2189. Marin R, Gorostidi M, Portal CG, Sanchez M, Sanchez E, Alvarez J. Long-term prognosis of hypertension in pregnancy. *Hypertension in pregnancy*. 2000;19(2):199-209.
2190. Maroni E, Youssef A, Arcangeli T, Nanni M, De Musso F, Contro E, et al. Increased uterine artery pulsatility index at 34 weeks and outcome of pregnancy. *Ultrasound Obstet Gynecol*. 2011 Oct;38(4):395-9.
2191. Marozio L, Facchinetti F, Allais G, Nappi RE, Enrietti M, Neri I, et al. Headache and adverse pregnancy outcomes: a prospective study. *European journal of obstetrics, gynecology, and reproductive biology*. 2012 Apr;161(2):140-3.
2192. Marques P, Carvalho MR, Pinto L, Guerra S. Metformin safety in the management of gestational diabetes. *Endocrine Practice*. 2014 01 Oct;20(10):1022-31.

2193. Marret S, Marchand L, Kaminski M, Larroque B, Arnaud C, Truffert P, et al. Prenatal low-dose aspirin and neurobehavioral outcomes of children born very preterm. *Pediatrics*. 2010 January;125(1):e29-e34.
2194. Marsden JT, Rees DC. A retrospective analysis of outcome of pregnancy in patients with acute porphyria. *J Inher Metab Dis*. 2010 Oct;33(5):591-6.
2195. Marshall JC, Walker PM, Foster DM, Harris D, Ribeiro M, Paice J, et al. Measurement of endotoxin activity in critically ill patients using whole blood neutrophil dependent chemiluminescence. *Critical care (London, England)*. 2002 Aug;6(4):342-8.
2196. Marshall NE, Guild C, Cheng YW, Caughey AB, Halloran DR. Maternal superobesity and perinatal outcomes. *Am J Obstet Gynecol*. 2012 May;206(5):417.e1-6.
2197. Marshall NE, Guild C, Cheng YW, Caughey AB, Halloran DR. The effect of maternal body mass index on perinatal outcomes in women with diabetes. *Am J Perinatol*. 2014 Mar;31(3):249-56.
2198. Marshall NE, Guild C, Cheng YW, Caughey AB, Halloran DR. Racial disparities in pregnancy outcomes in obese women. *The journal of maternal-fetal & neonatal medicine : the official journal of the European Association of Perinatal Medicine, the Federation of Asia and Oceania Perinatal Societies, the International Society of Perinatal Obstet*. 2014 Jan;27(2):122-6.
2199. Marsoosi V, Pirjani R, Jamal A, Eslamian L, Rahimi-Foroushani A. Second trimester biparietal diameter size and the risk of adverse pregnancy outcomes. *Prenatal diagnosis*. 2011 Oct;31(10):995-8.
2200. Martel MJ, Rey E, Beauchesne MF, Perreault S, Forget A, Maghni K, et al. Use of short-acting beta2-agonists during pregnancy and the risk of pregnancy-induced hypertension. *Journal of Allergy and Clinical Immunology*. 2007 March;119(3):576-82.
2201. Martillotti G, Ditisheim A, Burnier M, Wagner G, Boulvain M, Irion O, et al. Increased salt sensitivity of ambulatory blood pressure in women with a history of severe preeclampsia. *Hypertension*. 2013 Oct;62(4):802-8.
2202. Martin CL, Hall MH, Campbell DM. The effect of smoking on pre-eclampsia in twin pregnancy. *Bjog*. 2000 Jun;107(6):745-9.
2203. Martin F, Taylor GP. The safety of highly active antiretroviral therapy for the HIV-positive pregnant mother and her baby: Is 'the more the merrier'? *Journal of Antimicrobial Chemotherapy*. 2009 November;64(5):895-900.
2204. Martin JN, Jr., May WL, Rinehart BK, Martin RW, Magann EF. Increasing maternal weight: a risk factor for preeclampsia/eclampsia but apparently not for HELLP syndrome. *South Med J*. 2000 Jul;93(7):686-91.
2205. Martin JN, Jr., Thigpen BD, Moore RC, Rose CH, Cushman J, May W. Stroke and severe preeclampsia and eclampsia: a paradigm shift focusing on systolic blood pressure. *Obstet Gynecol*. 2005 Feb;105(2):246-54.
2206. Martinelli I, Ruggenenti P, Cetin I, Pardi G, Perna A, Vergani P, et al. Heparin in pregnant women with previous placenta-mediated pregnancy complications: A prospective, randomized, multicenter, controlled clinical trial. *Blood*. 2012 05 Apr;119(14):3269-75.
2207. Martinez-Cruz CF, Salgado-Valladares M, Poblano A, Trinidad-Perez MC. Risk factors associated with retinopathy of prematurity and visual alterations in infants with extremely low birth weight. *Revista de investigacion clinica; organo del Hospital de Enfermedades de la Nutricion*. 2012 Mar-Apr;64(2):136-43.
2208. Martinez-Ruiz A, Sarabia-Meseguer MD, Vilchez JA, Perez-Fornieles J, Delgado-Marin JL, Tovar-Zapata I, et al. Second trimester angiotensin-converting enzyme and uterine artery Doppler as predictors of preeclampsia in a high-risk population. *Hypertension in pregnancy*. 2015 01 May;34(2):171-80.
2209. Martins-Costa SH, Vettorazzi J, Valerio E, Maurmman C, Benevides G, Hemessath M, et al. Protein creatinine ratio in random urine sample of hypertensive pregnant women: maternal and



- perinatal outcomes. Hypertension in pregnancy. 2011;30(3):331-7.
2210. Maruotti GM, Sarno L, Napolitano R, Mazzarelli LL, Quaglia F, Capone A, et al. Preeclampsia in women with chronic kidney disease. The journal of maternal-fetal & neonatal medicine : the official journal of the European Association of Perinatal Medicine, the Federation of Asia and Oceania Perinatal Societies, the International Society of Perinatal Obstet. 2012 Aug;25(8):1367-9.
2211. Massardier J, Golfier F, Journet D, Frappart L, Zalaquett M, Schott AM, et al. Twin pregnancy with complete hydatidiform mole and coexistent fetus: obstetrical and oncological outcomes in a series of 14 cases. European journal of obstetrics, gynecology, and reproductive biology. 2009 Apr;143(2):84-7.
2212. Mathlouthi N, Ben Ayed B, Kbaili S, Trabelsi K, Dhoubi M, Chaabene K, et al. Prospective study about 45 cases of disseminated intravascular coagulation  
Etude prospective a propos de 45 cas de coagulation intra vasculaire disseminee. Tunisie Medicale. 2012 October;90(10):692-7.
2213. Matias DS, Costa RF, Matias B, Gordiano L, Correia LC. Ophthalmic artery Doppler velocimetric values in pregnant women at risk for preeclampsia. Journal of ultrasound in medicine : official journal of the American Institute of Ultrasound in Medicine. 2012 Oct;31(10):1659-64.
2214. Matok I, Azoulay L, Yin H, Suissa S. Immortal time bias in observational studies of drug effects in pregnancy. Birth defects research Part A, Clinical and molecular teratology. 2014 Sep;100(9):658-62.
2215. Matsuda Y, Ogawa M, Konno J, Mitani M, Matsui H. Prediction of fetal acidemia in placental abruption. BMC pregnancy and childbirth. 2013 01 Aug;13(156).
2216. Matsuo K, Ushioda N, Nagamatsu M, Kimura T. Hyperemesis gravidarum in Eastern Asian population. Gynecologic and Obstetric Investigation. 2007 November;64(4):213-6.
2217. Mattar F, Sibai BM. Eclampsia. VIII. Risk factors for maternal morbidity. Am J Obstet Gynecol. 2000 Feb;182(2):307-12.
2218. Matthys LA, Coppage KH, Lambers DS, Barton JR, Sibai BM. Delayed postpartum preeclampsia: an experience of 151 cases. Am J Obstet Gynecol. 2004 May;190(5):1464-6.
2219. Mattoo TK. Medical management of vesicoureteral reflux--quiz within the article. Don't overlook placebos. Pediatric nephrology (Berlin, Germany). 2007 Aug;22(8):1113-20.
2220. Mautner E, Greimel E, Trutnovsky G, Daghofer F, Egger JW, Lang U. Quality of life outcomes in pregnancy and postpartum complicated by hypertensive disorders, gestational diabetes, and preterm birth. Journal of Psychosomatic Obstetrics and Gynecology. 2009 December;30(4):231-7.
2221. Maxwell CV, Lieberman E, Norton M, Cohen A, Seely EW, Lee-Parritz A. Relationship of twin zygosity and risk of preeclampsia. Am J Obstet Gynecol. 2001 Oct;185(4):819-21.
2222. Mayer A, Erez O, Novack L, Bashiri A, Wiznitzer A, Mazor M. Chronic hypertension is an independent risk factor for preeclampsia and preterm delivery in women with rheumatologic diseases: a population-based study. European journal of obstetrics, gynecology, and reproductive biology. 2007 Aug;133(2):157-63.
2223. Maynard SE, Moore Simas TA, Bur L, Crawford SL, Solitro MJ, Meyer BA. Soluble endoglin for the prediction of preeclampsia in a high risk cohort. Hypertension in pregnancy. 2010 August;29(3):330-41.
2224. Maynard SE, Moore Simas TA, Solitro MJ, Rajan A, Crawford S, Soderland P, et al. Circulating angiogenic factors in singleton vs multiple-gestation pregnancies. Am J Obstet Gynecol. 2008 Feb;198(2):200.e1-7.
2225. Mazar RM, Srinivas SK, Sammel MD, Andrela CM, Elovitz MA. Metabolic score as a novel approach to assessing preeclampsia risk. American Journal of Obstetrics and Gynecology. 2007 October;197(4):411.e1-.e5.
2226. Mazor-Dray E, Levy A, Schlaeffer F, Sheiner E. Maternal urinary tract infection: is it independently associated with adverse pregnancy outcome? The journal of maternal-fetal & neonatal medicine : the official journal of the European Association of Perinatal Medicine, the Federation of Asia and Oceania Perinatal Societies, the International Society of Perinatal Obstet. 2009 Feb;22(2):124-8.

2227. Mbachu, II, Udigwe GO, Okafor CI, Umeonunihu OS, Ezeama C, Eleje GU. The pattern and obstetric outcome of hypertensive disorders of pregnancy in Nnewi, Nigeria. *Niger J Med*. 2013 Apr-Jun;22(2):117-22.
2228. Mbah AK, Alio AP, Marty PJ, Bruder K, Whiteman VE, Salihu HM. Pre-eclampsia in the first pregnancy and subsequent risk of stillbirth in black and white gravidas. *European Journal of Obstetrics Gynecology and Reproductive Biology*. 2010 April;149(2):165-9.
2229. Mbah AK, Alio AP, Marty PJ, Bruder K, Wilson R, Salihu HM. Recurrent versus isolated pre-eclampsia and risk of feto-infant morbidity outcomes: racial/ethnic disparity. *European journal of obstetrics, gynecology, and reproductive biology*. 2011 May;156(1):23-8.
2230. Mbah AK, Kornosky JL, Kristensen S, August EM, Alio AP, Marty PJ, et al. Super-obesity and risk for early and late pre-eclampsia. *Bjog*. 2010 Jul;117(8):997-1004.
2231. Mbassi SM, Mbu R, Bouvier-Colle MH. Use of routinely collected data to assess maternal mortality in seven tertiary maternity centers in Cameroon. *International Journal of Gynecology and Obstetrics*. 2011 December;115(3):240-3.
2232. Mbazor OJ, Umeora OU. Incidence and risk factors for low birth weight among term singletons at the University of Benin Teaching Hospital (UBTH), Benin City, Nigeria. *Nigerian journal of clinical practice*. 2007 Jun;10(2):95-9.
2233. Mbweza E. Risk factors for perinatal asphyxia at Queen Elizabeth Central Hospital, Malawi. *Clin Excell Nurse Pract*. 2000 May;4(3):158-62.
2234. McCarthy FP, Kenny LC. Hypertension in pregnancy. *Obstetrics, Gynaecology and Reproductive Medicine*. 2012 June;22(6):141-7.
2235. McCarthy FP, Khashan AS, North RA, Moss-Morris R, Baker PN, Dekker G, et al. A prospective cohort study investigating associations between hyperemesis gravidarum and cognitive, behavioural and emotional well-being in pregnancy. *PLoS one*. 2011 18 Nov;6(11).
2236. McCarthy FP, Khashan AS, North RA, Rahma MB, Walker JJ, Baker PN, et al. Pregnancy loss managed by cervical dilatation and curettage increases the risk of spontaneous preterm birth. *Human reproduction*. 2013 Dec;28(12):3197-206.
2237. McCarthy FP, O'Keefe LM, Khashan AS, North RA, Poston L, McCowan LM, et al. Association between maternal alcohol consumption in early pregnancy and pregnancy outcomes. *Obstet Gynecol*. 2013 Oct;122(4):830-7.
2238. McClure CK, Catov JM, Ness R, Bodnar LM. Associations between gestational weight gain and BMI, abdominal adiposity, and traditional measures of cardiometabolic risk in mothers 8 y postpartum. *American Journal of Clinical Nutrition*. 2013 01 Nov;98(5):1218-25.
2239. McConnell D, Mayes R, Llewellyn G. Women with intellectual disability at risk of adverse pregnancy and birth outcomes. *Journal of intellectual disability research : JIDR*. 2008 Jun;52(Pt 6):529-35.
2240. McCormack D, Scott-Heyes G, McCusker CG. The impact of hyperemesis gravidarum on maternal mental health and maternal-fetal attachment. *Journal of Psychosomatic Obstetrics and Gynecology*. 2011 June;32(2):79-87.
2241. McCormack RA, Doherty DA, Magann EF, Hutchinson M, Newnham JP. Antepartum bleeding of unknown origin in the second half of pregnancy and pregnancy outcomes. *Bjog*. 2008 Oct;115(11):1451-7.
2242. McDonagh RJ, Ray JG, Burrows RF, Burrows EA, Vermeulen MJ. Platelet count may predict abnormal bleeding time among pregnant women with hypertension and preeclampsia. *Canadian journal of anaesthesia = Journal canadien d'anesthesie*. 2001 Jun;48(6):563-9.
2243. McDonald SD, Best C, Lam K. The recurrence risk of severe de novo pre-eclampsia in singleton pregnancies: A population-based cohort. *BJOG: An International Journal of Obstetrics and Gynaecology*. 2009 November;116(12):1578-84.

2244. McDonald SD, Han Z, Walsh MW, Gerstein HC, Devereaux PJ. Kidney Disease After Preeclampsia: A Systematic Review and Meta-analysis. *American Journal of Kidney Diseases*. 2010 June;55(6):1026-39.
2245. McDonald SD, Malinowski A, Zhou Q, Yusuf S, Devereaux PJ. Cardiovascular sequelae of preeclampsia/eclampsia: A systematic review and meta-analyses. *American Heart Journal*. 2008 November;156(5):918-30.
2246. McDonald SD, Ray J, Teo K, Jung H, Salehian O, Yusuf S, et al. Measures of cardiovascular risk and subclinical atherosclerosis in a cohort of women with a remote history of preeclampsia. *Atherosclerosis*. 2013 Jul;229(1):234-9.
2247. McDonnold M, Dunn H, Hester A, Pacheco LD, Hankins GD, Saade GR, et al. High risk human papillomavirus at entry to prenatal care and risk of preeclampsia. *Am J Obstet Gynecol*. 2014 Feb;210(2):138.e1-5.
2248. McElrath TF, Allred EN, Boggess KA, Kuban K, O'Shea TM, Paneth N, et al. Maternal antenatal complications and the risk of neonatal cerebral white matter damage and later cerebral palsy in children born at an extremely low gestational age. *American journal of epidemiology*. 2009 Oct 1;170(7):819-28.
2249. McElrath TF, Allred EN, Kuban K, Hecht JL, Onderdonk A, O'Shea TM, et al. Factors associated with small head circumference at birth among infants born before the 28th week. *Am J Obstet Gynecol*. 2010 Aug;203(2):138.e1-8.
2250. McElrath TF, Lim KH, Pare E, Rich-Edwards J, Pucci D, Troisi R, et al. Longitudinal evaluation of predictive value for preeclampsia of circulating angiogenic factors through pregnancy. *American Journal of Obstetrics and Gynecology*. 2012 November;207(5):407.e1-.e7.
2251. McGready R, Boel M, Rijken MJ, Ashley EA, Cho T, Moo O, et al. Effect of early detection and treatment on malaria related maternal mortality on the north-western border of thailand 1986-2010. *PloS one*. 2012 18 Jul;7(7).
2252. McKenna D, Tharmaratnam S, Mahsud S, Dornan J. Ultrasonic evidence of placental calcification at 36 weeks' gestation: maternal and fetal outcomes. *Acta Obstet Gynecol Scand*. 2005 Jan;84(1):7-10.
2253. McLaughlin GB, Cheng YW, Caughey AB. Women with one elevated 3-hour glucose tolerance test value: are they at risk for adverse perinatal outcomes? *Am J Obstet Gynecol*. 2006 May;194(5):e16-9.
2254. McLeod D, Pullon S, Cookson T. Factors that influence changes in smoking behaviour during pregnancy. *New Zealand Medical Journal*. 1173;116(1173).
2255. McLernon DJ, Lee AJ, Bhattacharya S. Reproductive outcomes following ectopic pregnancy: Register-based retrospective cohort study. *PLoS Medicine*. 2012;9(6):16.
2256. McMahan MA, Kearns G, O'Connell P, Keogan M. The prevalence of antiphospholipid antibody syndrome among systemic lupus erythematosus patients. *Irish medical journal*. 2006;99(10).
2257. McNamara H, Hutcheon JA, Platt RW, Benjamin A, Kramer MS. Risk factors for high and low placental weight. *Paediatric and perinatal epidemiology*. 2014 March;28(2):97-105.
2258. McPherson JA, Harper LM, Odibo AO, Roehl KA, Cahill AG. Maternal seizure disorder and risk of adverse pregnancy outcomes. *Am J Obstet Gynecol*. 2013 May;208(5):378.e1-5.
2259. McPherson JA, Odibo AO, Shanks AL, Roehl KA, Macones GA, Cahill AG. Adverse outcomes in twin pregnancies complicated by early vaginal bleeding. *Am J Obstet Gynecol*. 2013 Jan;208(1):56.e1-5.
2260. Mecacci F, Bianchi B, Pieralli A, Mangani B, Moretti A, Cioni R, et al. Pregnancy outcome in systemic lupus erythematosus complicated by anti-phospholipid antibodies. *Rheumatology (Oxford)*. 2009 Mar;48(3):246-9.
2261. Mecacci F, Carignani L, Cioni R, Parretti E, Mignosa M, Piccioli A, et al. Time course of recovery and complications of HELLP syndrome with two different treatments: heparin or dexamethasone. *Thromb Res*. 2001 Apr 15;102(2):99-105.
2262. Medina G, Vera-Lastra O, Angeles U, Jara LJ. Mono-organic versus multi-organic involvement in primary antiphospholipid syndrome. *Annals of the New York Academy of Sciences*. 2005

Jun;1051:304-12.

2263. Mehrabadi A, Hutcheon JA, Lee L, Kramer MS, Liston RM, Joseph KS. Epidemiological investigation of a temporal increase in atonic postpartum haemorrhage: A population-based retrospective cohort study. *BJOG: An International Journal of Obstetrics and Gynaecology*. 2013 June;120(7):853-62.
2264. Mehrabadi A, Liu S, Bartholomew S, Hutcheon JA, Magee LA, Kramer MS, et al. Hypertensive disorders of pregnancy and the recent increase in obstetric acute renal failure in Canada: population based retrospective cohort study. *Bmj*. 2014;349:g4731.
2265. Mehrabian F, Hosseini SM. Comparison of gestational diabetes mellitus and pre-eclampsia in women with high hemoglobin in the first trimester of pregnancy: A longitudinal study. *Pakistan Journal of Medical Sciences*. 2013;29(4):986-90.
2266. Mehta NJ, Mehta RN, Khan IA. Peripartum cardiomyopathy: Clinical and therapeutic aspects. *Angiology*. 2001;52(11):759-62.
2267. Mei-Dan E, Walfisch A, Martinowitz U, Hallak M. A rapidly progressive, life-threatening postpartum hemorrhage: Successful treatment with anti-CD-20 monoclonal antibody. *Obstetrics and Gynecology*. 2009 August;114(2 PART 2 SUPPL.):417-9.
2268. Mei-Dan E, Wiznitzer A, Sergienko R, Hallak M, Sheiner E. Prediction of preeclampsia: liver function tests during the first 20 gestational weeks. *The journal of maternal-fetal & neonatal medicine : the official journal of the European Association of Perinatal Medicine, the Federation of Asia and Oceania Perinatal Societies, the International Society of Perinatal Obstet*. 2013 Feb;26(3):250-3.
2269. Meijer C, Wiezer MJ, Hack CE, Boelens PG, Wedel NI, Meijer S, et al. Coagulopathy following major liver resection: the effect of rBPI21 and the role of decreased synthesis of regulating proteins by the liver. *Shock (Augusta, Ga)*. 2001 Apr;15(4):261-71.
2270. Mekinian A, Loire-Berson P, Nicaise-Roland P, Lachassinne E, Stirnemann J, Boffa MC, et al. Outcomes and treatment of obstetrical antiphospholipid syndrome in women with low antiphospholipid antibody levels. *J Reprod Immunol*. 2012 Jun;94(2):222-6.
2271. Melamed N, Ben-Haroush A, Kremer S, Hod M, Yogev Y. Failure of cervical ripening with prostaglandin-E2 can it be predicted? *The journal of maternal-fetal & neonatal medicine : the official journal of the European Association of Perinatal Medicine, the Federation of Asia and Oceania Perinatal Societies, the International Society of Perinatal Obstet*. 2010 Jun;23(6):536-40.
2272. Melamed N, Chen R, Soiberman U, Ben-Haroush A, Hod M, Yogev Y. Spontaneous and indicated preterm delivery in pregestational diabetes mellitus: etiology and risk factors. *Arch Gynecol Obstet*. 2008 Aug;278(2):129-34.
2273. Melamed N, Hadar E, Peled Y, Hod M, Wiznitzer A, Yogev Y. Risk for recurrence of preeclampsia and outcome of subsequent pregnancy in women with preeclampsia in their first pregnancy. *The journal of maternal-fetal & neonatal medicine : the official journal of the European Association of Perinatal Medicine, the Federation of Asia and Oceania Perinatal Societies, the International Society of Perinatal Obstet*. 2012 Nov;25(11):2248-51.
2274. Melamed N, Hirsch L, Hod M, Chen R, Wiznitzer A, Yogev Y. Is abnormal 50-g glucose-challenge testing an independent predictor of adverse pregnancy outcome. *Journal of Maternal-Fetal and Neonatal Medicine*. 2012 December;25(12):2583-7.
2275. Melchiorre K, Leslie K, Prefumo F, Bhide A, Thilaganathan B. First-trimester uterine artery Doppler indices in the prediction of small-for-gestational age pregnancy and intrauterine growth restriction. *Ultrasound Obstet Gynecol*. 2009 May;33(5):524-9.
2276. Melchiorre K, Sutherland G, Sharma R, Nanni M, Thilaganathan B. Mid-gestational maternal cardiovascular profile in preterm and term pre-eclampsia: a prospective study. *Bjog*. 2013 Mar;120(4):496-504.
2277. Melchiorre K, Sutherland GR, Baltabaeva A, Liberati M, Thilaganathan B. Maternal cardiac

- dysfunction and remodeling in women with preeclampsia at term. *Hypertension*. 2011 Jan;57(1):85-93.
2278. Melchiorre K, Sutherland GR, Liberati M, Bhide A, Thilaganathan B. Prevalence of maternal cardiac defects in women with high-resistance uterine artery Doppler indices. *Ultrasound Obstet Gynecol*. 2011 Mar;37(3):310-6.
2279. Melchiorre K, Sutherland GR, Liberati M, Thilaganathan B. Preeclampsia is associated with persistent postpartum cardiovascular impairment. *Hypertension*. 2011 Oct;58(4):709-15.
2280. Melchiorre K, Sutherland GR, Liberati M, Thilaganathan B. Maternal cardiovascular impairment in pregnancies complicated by severe fetal growth restriction. *Hypertension*. 2012 Aug;60(2):437-43.
2281. Melchiorre K, Sutherland GR, Watt-Coote I, Liberati M, Thilaganathan B. Severe myocardial impairment and chamber dysfunction in preterm preeclampsia. *Hypertension in pregnancy*. 2012;31(4):454-71.
2282. Melchiorre K, Wormald B, Leslie K, Bhide A, Thilaganathan B. First-trimester uterine artery Doppler indices in term and preterm pre-eclampsia. *Ultrasound Obstet Gynecol*. 2008 Aug;32(2):133-7.
2283. Melekoglu R, Evruke C, Kafadar T, Misirlioglu S, Buyukkurt S, Ozgunen FT. Perinatal outcomes of adolescent pregnancy  
Adolesan Gebellkleri Perinatal Sonuclari. *Turk Jinekoloji ve Obstetrik Dernegi Dergisi*. 2013;10(4):213-9.
2284. Melillo L, Tieghi A, Candoni A, Radaelli F, Ciancia R, Specchia G, et al. Outcome of 122 pregnancies in essential thrombocythemia patients: A report from the Italian registry. *American Journal of Hematology*. 2009 October;84(10):636-40.
2285. Melkert P, Melkert D, Kahema L, Van Der Velden K, Van Roosmalen J. Estimation of changes in maternal mortality in a rural district of northern Tanzania during the last 50 years. *Acta Obstetrica et Gynecologica Scandinavica*. 2015 01 Apr;94(4):419-24.
2286. Mello G, Parretti E, Ognibene A, Mecacci F, Cioni R, Scarselli G, et al. Prediction of the development of pregnancy-induced hypertensive disorders in high-risk pregnant women by artificial neural networks. *Clin Chem Lab Med*. 2001 Sep;39(9):801-5.
2287. Melo B, Amorim M, Katz L, Coutinho I, Figueiroa JN. Hypertension, pregnancy and weather: is seasonality involved? *Revista da Associacao Medica Brasileira (1992)*. 2014 Mar-Apr;60(2):105-10.
2288. Meltzer HM, Brantsaeter AL, Nilsen RM, Magnus P, Alexander J, Haugen M. Effect of dietary factors in pregnancy on risk of pregnancy complications: results from the Norwegian Mother and Child Cohort Study. *The American journal of clinical nutrition*. 2011 Dec;94(6 Suppl):1970s-4s.
2289. Memon S, Khowaja S, Sohag AA. Maternal mortality at Liaquat University Hospital, Hyderabad. *Journal of the Liaquat University of Medical and Health Sciences*. 2009 January/April;8(1):65-7.
2290. Mendieta Zeron H, Garcia Solorio VJ, Nava Diaz PM, Garduno Alanis A, Santillan Benitez JG, Dominguez Garcia V, et al. Hyperleptinemia as a prognostic factor for preeclampsia: a cohort study. *Acta medica (Hradec Kralove) / Universitas Carolina, Facultas Medica Hradec Kralove*. 2012;55(4):165-71.
2291. Mendieta-Zeron H, Huerta-Coyote O. Dyslipidemia is a persistent problem in puerperium with or without preeclampsia. *Clinical and experimental obstetrics & gynecology*. 2013;40(2):229-32.
2292. Mendilcioglu I, Trak B, Uner M, Umit S, Kucukosmanoglu M. Recurrent preeclampsia and perinatal outcome: a study of women with recurrent preeclampsia compared with women with preeclampsia who remained normotensive during their prior pregnancies. *Acta Obstet Gynecol Scand*. 2004 Nov;83(11):1044-8.
2293. Mendizabal M, Rowe C, Pinero F, Gonzalez-Campana A, Fauda M, Tomas Arufe D, et al. Successful orthotopic liver transplantation and delayed delivery of a healthy newborn in a woman with fulminant hepatic failure during the second trimester of pregnancy. *Ann Hepatol*. 2014 Mar-Apr;13(2):288-92.
2294. Mendola P, Laughon SK, Mannisto TI, Leishear K, Reddy UM, Chen Z, et al. Obstetric complications among US women with asthma. *Am J Obstet Gynecol*. 2013 Feb;208(2):127.e1-8.
2295. Menzies J, Magee LA, Li J, MacNab YC, Yin R, Stuart H, et al. Instituting surveillance guidelines

- and adverse outcomes in preeclampsia. *Obstet Gynecol.* 2007 Jul;110(1):121-7.
2296. Menzies J, Magee LA, Macnab YC, Ansermino JM, Li J, Douglas MJ, et al. Current CHS and NHBPEP criteria for severe preeclampsia do not uniformly predict adverse maternal or perinatal outcomes. *Hypertension in pregnancy.* 2007;26(4):447-62.
2297. Menzies-Gow NJ, Bailey SR, Stevens K, Katz L, Elliott J, Marr CM. Digital blood flow and plasma endothelin concentration in clinically endotoxemic horses. *American journal of veterinary research.* 2005 Apr;66(4):630-6.
2298. Mercer B, Milluzzi C, Collin M. Periviable birth at 20 to 26 weeks of gestation: proximate causes, previous obstetric history and recurrence risk. *Am J Obstet Gynecol.* 2005 Sep;193(3 Pt 2):1175-80.
2299. Merricks MJ, Stott CM, Goodyer IM, Bolton PF. The aetiology of specific language impairment: no evidence of a role for obstetric complications. *Journal of neural transmission (Vienna, Austria : 1996).* 2004 Jul;111(7):773-89.
2300. Merviel P, Muller F, Guibourdenche J, Berkane N, Gaudet R, Breart G, et al. Correlations between serum assays of human chorionic gonadotrophin (hCG) and human placental lactogen (hPL) and pre-eclampsia or intrauterine growth restriction (IUGR) among nulliparas younger than 38 years. *European Journal of Obstetrics Gynecology and Reproductive Biology.* 2001;95(1):59-67.
2301. Mesleh RA, Al-Aql AS, Kurdi AM. Teenage pregnancy. *Saudi medical journal.* 2001 Oct;22(10):864-7.
2302. Mestan KK, Check J, Minturn L, Yallapragada S, Farrow KN, Liu X, et al. Placental pathologic changes of maternal vascular underperfusion in bronchopulmonary dysplasia and pulmonary hypertension. *Placenta.* 2014 Aug;35(8):570-4.
2303. Metzger BE. Hyperglycaemia and adverse pregnancy outcome (HAPO) study: Associations with maternal body mass index. *BJOG: An International Journal of Obstetrics and Gynaecology.* 2010 April;117(5):575-84.
2304. Mhyre JM, Shilkrot A, Kuklina EV, Callaghan WM, Creanga AA, Kaminsky S, et al. Massive blood transfusion during hospitalization for delivery in New York State, 1998-2007. *Obstet Gynecol.* 2013 Dec;122(6):1288-94.
2305. Mialhe G, Le Ray C, Timsit J, Lepercq J. Factors associated with urgent cesarean delivery in women with type 1 diabetes mellitus. *Obstet Gynecol.* 2013 May;121(5):983-9.
2306. Michalowicz BS, Hodges JS, Novak MJ, Buchanan W, Diangelis AJ, Papapanou PN, et al. Change in periodontitis during pregnancy and the risk of pre-term birth and low birthweight. *Journal of Clinical Periodontology.* 2009 April;36(4):308-14.
2307. Michaluk A, Dionne MD, Gazdovich S, Buch D, Ducruet T, Leduc L. Predicting preterm birth in twin pregnancy: was the previous birth preterm? A Canadian experience. *Journal of obstetrics and gynaecology Canada : JOGC = Journal d'obstetrique et gynecologie du Canada : JOGC.* 2013 Sep;35(9):793-801.
2308. Miettola S, Hartikainen AL, Vaarasmaki M, Bloigu A, Ruokonen A, Jarvelin MR, et al. Offspring's blood pressure and metabolic phenotype after exposure to gestational hypertension in utero. *Eur J Epidemiol.* 2013 Jan;28(1):87-98.
2309. Miettola S, Hovi P, Andersson S, Strang-Karlsson S, Pouta A, Laivuori H, et al. Maternal preeclampsia and bone mineral density of the adult offspring. *Am J Obstet Gynecol.* 2013 Nov;209(5):443.e1-e10.
2310. Miguil M, Chekairi A. Eclampsia, study of 342 cases. *Hypertension in pregnancy.* 2008;27(2):103-11.
2311. Mhrshahi S, Belousova E, Marks GB, Peat JK. Pregnancy and birth outcomes in families with asthma. *The Journal of asthma : official journal of the Association for the Care of Asthma.* 2003 Apr;40(2):181-7.
2312. Mijal RS, Holzman CB, Rana S, Karumanchi SA, Wang J, Sikorskii A. Mid-pregnancy levels of

- angiogenic markers as indicators of pathways to preterm delivery. *Journal of Maternal-Fetal and Neonatal Medicine*. 2012 July;25(7):1135-41.
2313. Mikami Y, Takagi K, Itaya Y, Ono Y, Matsumura H, Takai Y, et al. Post-partum recovery course in patients with gestational hypertension and pre-eclampsia. *The journal of obstetrics and gynaecology research*. 2014 Apr;40(4):919-25.
2314. Mikola M, Hiilesmaa V, Halttunen M, Suhonen L, Tiitinen A. Obstetric outcome in women with polycystic ovarian syndrome. *Human reproduction*. 2001;16(2):226-9.
2315. Mikolajczyk RT, Zhang J, Ford J, Grewal J. Effects of interpregnancy interval on blood pressure in consecutive pregnancies. *American journal of epidemiology*. 2008 Aug 15;168(4):422-6.
2316. Miller JC, Mastrobattista JM, Katz AR. Obstetrical and neonatal outcome in pregnancies after liver transplantation. *Am J Perinatol*. 2000;17(6):299-302.
2317. Miller RS, Thompson ML, Williams MA. Trimester-specific blood pressure levels in relation to maternal pre-pregnancy body mass index. *Paediatric and perinatal epidemiology*. 2007 Nov;21(6):487-94.
2318. Millman AL, Payne B, Qu Z, Douglas MJ, Hutcheon JA, Lee T, et al. Oxygen saturation as a predictor of adverse maternal outcomes in women with preeclampsia. *Journal of obstetrics and gynaecology Canada : JOGC = Journal d'obstetrique et gynecologie du Canada : JOGC*. 2011 Jul;33(7):705-14.
2319. Mineyko A, Kirton A. The black box of perinatal ischemic stroke pathogenesis. *Journal of Child Neurology*. 2011 September;26(9):1154-62.
2320. Minire A, Mirton M, Imri V, Lauren M, Aferdita M. Maternal complications of preeclampsia. *Medical archives (Sarajevo, Bosnia and Herzegovina)*. 2013;67(5):339-41.
2321. Minkauskiene M, Nadisauskiene RJ, Padaiga Z. Severe and acute maternal morbidity: Lithuanian experience and review. *Int J Fertil Womens Med*. 2006 Jan-Feb;51(1):39-46.
2322. Miranda ML, Macher HC, Munoz-Hernandez R, Vallejo-Vaz A, Moreno-Luna R, Villar J, et al. Role of circulating cell-free DNA levels in patients with severe preeclampsia and HELLP syndrome. *American journal of hypertension*. 2013 Dec;26(12):1377-80.
2323. Mirpuri NG, Dyson M, Rymer J, Bolton PA, Young SR. High-frequency ultrasound imaging of the skin during normal and hypertensive pregnancies. *Skin research and technology : official journal of International Society for Bioengineering and the Skin (ISBS) [and] International Society for Digital Imaging of Skin (ISDIS) [and] International Society for Skin Imaging (ISSI)*. 2001 Feb;7(1):65-9.
2324. Mirza FG, Strohsnitter WC, Rivera J, Gyamfi-Bannerman C. Intrauterine growth restriction with abnormal umbilical artery Dopplers: a harbinger for preeclampsia? *The journal of maternal-fetal & neonatal medicine : the official journal of the European Association of Perinatal Medicine, the Federation of Asia and Oceania Perinatal Societies, the International Society of Perinatal Obstet*. 2012 Dec;25(12):2658-61.
2325. Mischak H, Critselis E, Hanash S, Gallagher WM, Vlahou A, Ioannidis JPA. Epidemiologic design and analysis for proteomic studies: A primer on -omic technologies. *American journal of epidemiology*. 2015 01 May;181(9):635-47.
2326. Mislanova C, Martsenyuk O, Huppertz B, Obolenskaya M. Placental markers of folate-related metabolism in preeclampsia. *Reproduction (Cambridge, England)*. 2011 Sep;142(3):467-76.
2327. Missfelder-Lobos H, Teran E, Lees C, Albaiges G, Nicolaidis KH. Platelet changes and subsequent development of pre-eclampsia and fetal growth restriction in women with abnormal uterine artery Doppler screening. *Ultrasound Obstet Gynecol*. 2002 May;19(5):443-8.
2328. Mistry HD, Gill CA, Kurlak LO, Seed PT, Hesketh JE, Meplan C, et al. Association between maternal micronutrient status, oxidative stress, and common genetic variants in antioxidant enzymes at 15 weeks' gestation in nulliparous women who subsequently develop preeclampsia. *Free Radical Biology and Medicine*. 2015 January;78:147-55.

2329. Misund AR, Nerdrum P, Braten S, Pripp AH, Diseth TH. Long-term risk of mental health problems in women experiencing preterm birth: A longitudinal study of 29 mothers. *Annals of General Psychiatry*. 2013 31 Oct;12(1).
2330. Mitani M, Matsuda Y, Makino Y, Akizawa Y, Ohta H. Clinical features of fetal growth restriction complicated later by preeclampsia. *The journal of obstetrics and gynaecology research*. 2009 Oct;35(5):882-7.
2331. Miyagami S, Koide K, Sekizawa A, Ventura W, Yotsumoto J, Oishi S, et al. Physiological changes in the pattern of placental gene expression early in the first trimester. *Reprod Sci*. 2013 Jun;20(6):710-4.
2332. Miyake H, Iwasaki N, Nakai A, Suzuki S, Takeshita T. The influence of assisted reproductive technology on women with pregnancy-induced hypertension: a retrospective study at a Japanese Regional Perinatal Center. *Journal of Nippon Medical School = Nippon Ika Daigaku zasshi*. 2010 Dec;77(6):312-7.
2333. Miyakoshi K, Tanaka M, Matsumoto T, Hattori Y, Ueno K, Teranishi T, et al. Hypertensive disorders in Japanese women with gestational glucose intolerance. *Diabetes Res Clin Pract*. 2004 Jun;64(3):201-5.
2334. Mjahed K, Alaoui SY, Barrou L. Acute renal failure during eclampsia: incidence risks factors and outcome in intensive care unit. *Ren Fail*. 2004 May;26(3):215-21.
2335. Mjahed K, Hamoudi D, Salmi S, Barrou L. Obstetric patients in a surgical intensive care unit: Prognostic factors and outcome. *Journal of Obstetrics and Gynaecology*. 2006 01 Jul;26(5):418-23.
2336. Mlay GS, Manji KP. Respiratory distress syndrome among neonates admitted at Muhimbili medical centre, Dar es Salaam, Tanzania. *Journal of Tropical Pediatrics*. 2000;46(5):303-7.
2337. Mmbaga BT, Lie RT, Olomi R, Mahande MJ, Olola O, Daltveit AK. Causes of perinatal death at a tertiary care hospital in Northern Tanzania 2000-2010: a registry based study. *BMC pregnancy and childbirth*. 2012;12:139.
2338. Mobasher Z, Salam MT, Goodwin T, Lurmann F, Ingles SA, Wilson ML. Associations between ambient air pollution and Hypertensive Disorders of Pregnancy. *Environmental Research*. 2013 May;123:9-16.
2339. Mobasheri E, Golalipour MJ. The effect of pre-pregnancy body mass index on gestational weight gain and pregnancy outcome in Gorgan, North Iran. *Journal of Medical Sciences*. 2007 01 Jul;7(5):905-8.
2340. Mochimaru A, Aoki S, Oba MS, Kurasawa K, Takahashi T, Hirahara F. Adverse pregnancy outcomes associated with adenomyosis with uterine enlargement. *Journal of Obstetrics and Gynaecology Research*. 2015 01 Apr;41(4):529-33.
2341. Moghbeli N, Srinivas SK, Bastek J, Lu Y, Putt ME, Cappola TP, et al. N-terminal pro-brain natriuretic Peptide as a biomarker for hypertensive disorders of pregnancy. *Am J Perinatol*. 2010 Apr;27(4):313-9.
2342. Mogollon JA, Boivin C, Philippe K, Turcotte S, Lemieux S, Blanchet C, et al. Consumption of chocolate in pregnant women and risk of preeclampsia: a systematic review. *Systematic reviews*. 2013;2:114.
2343. Mogos MF, Salihu HM, Aliyu MH, Whiteman VE, Sultan DH. Association between reproductive cancer and fetal outcomes: A population-based study. *International Journal of Gynecological Cancer*. 2013 February;23(2):218-26.
2344. Mogren I, Stenlund H, Hogberg U. Long-term impact of reproductive factors on the risk of cervical, endometrial, ovarian and breast cancer. *Acta oncologica (Stockholm, Sweden)*. 2001;40(7):849-54.
2345. Mohamed KAA, Saad AS. Enoxaparin and aspirin therapy for recurrent pregnancy loss due to anti-phospholipid syndrome (APS). *Middle East Fertility Society Journal*. 2014 September;19(3):176-82.
2346. Mohamed N, Eviston DP, Quinton AE, Benzie RJ, Kirby AC, Peek MJ, et al. Smaller fetal thymuses in pre-eclampsia: a prospective cross-sectional study. *Ultrasound Obstet Gynecol*. 2011 Apr;37(4):410-5.



2347. Mohorovic L. The role of methemoglobinemia in early and late complicated pregnancy. *Medical Hypotheses*. 2007;68(5):1114-9.
2348. Mohorovic L, Materljan E, Brumini G. Consequences of methemoglobinemia in pregnancy in newborns, children, and adults: issues raised by new findings on methemoglobin catabolism. *The journal of maternal-fetal & neonatal medicine : the official journal of the European Association of Perinatal Medicine, the Federation of Asia and Oceania Perinatal Societies, the International Society of Perinatal Obstet*. 2010 Sep;23(9):956-9.
2349. Mohorovic L, Petrovic O, Haller H, Micovic V. Pregnancy loss and maternal methemoglobin levels: an indirect explanation of the association of environmental toxics and their adverse effects on the mother and the fetus. *Int J Environ Res Public Health*. 2010 Dec;7(12):4203-12.
2350. Mokbel A, Geilan AM, AboElgheit S. Could women with systemic lupus erythematosus (SLE) have successful pregnancy outcomes? Prospective observational study. *Egyptian Rheumatologist*. 2013 July;35(3):133-9.
2351. Molad Y, Borkowski T, Monselise A, Ben-Haroush A, Sulkes J, Hod M, et al. Maternal and fetal outcome of lupus pregnancy: a prospective study of 29 pregnancies. *Lupus*. 2005;14(2):145-51.
2352. Molvarec A, Jermendy A, Kovacs M, Prohaszka Z, Rigo J, Jr. Toll-like receptor 4 gene polymorphisms and preeclampsia: lack of association in a Caucasian population. *Hypertension research : official journal of the Japanese Society of Hypertension*. 2008 May;31(5):859-64.
2353. Monari F, Alberico S, Avagliano L, Cetin I, Cozzolino S, Gargano G, et al. Relation between maternal thrombophilia and stillbirth according to causes/associated conditions of death. *Early Human Development*. 2012 April;88(4):251-4.
2354. Mone F, McAuliffe FM. Preconception low-dose aspirin and pregnancy outcomes: Results from the EAGeR randomized trial. *Irish medical journal*. 2015;108(1).
2355. Monen L, Kuppens SM, Hasaart TH, Oosterbaan HP, Oei SG, Wijnen H, et al. Maternal thyrotropin is independently related to Small for Gestational Age neonates at term. *Clinical Endocrinology*. 2015 01 Feb;82(2):254-9.
2356. Mongraw-Chaffin ML, Cirillo PM, Cohn BA. Preeclampsia and cardiovascular disease death: prospective evidence from the child health and development studies cohort. *Hypertension*. 2010 Jul;56(1):166-71.
2357. Montanari L, Alfei A, Albonico G, Moratti R, Arossa A, Beneventi F, et al. The impact of first-trimester serum free beta-human chorionic gonadotropin and pregnancy-associated plasma protein A on the diagnosis of fetal growth restriction and small for gestational age infant. *Fetal Diagnosis and Therapy*. 2009 August;25(1):130-5.
2358. Montassir H, Maegaki Y, Ogura K, Kurozawa Y, Nagata I, Kanzaki S, et al. Associated factors in neonatal hypoglycemic brain injury. *Brain & development*. 2009 Oct;31(9):649-56.
2359. Montouris G. Gabapentin exposure in human pregnancy: Results from the gabapentin pregnancy registry. *Epilepsy and Behavior*. 2003 June;4(3):310-7.
2360. Moodley J, Jjuuko G, Rout C. Epidural compared with general anaesthesia for caesarean delivery in conscious women with eclampsia. *Bjog*. 2001 Apr;108(4):378-82.
2361. Moore AG, Young H, Keller JM, Ojo LR, Yan J, Simas TA, et al. Angiogenic biomarkers for prediction of maternal and neonatal complications in suspected preeclampsia. *The journal of maternal-fetal & neonatal medicine : the official journal of the European Association of Perinatal Medicine, the Federation of Asia and Oceania Perinatal Societies, the International Society of Perinatal Obstet*. 2012 Dec;25(12):2651-7.
2362. Moore ES, Elnaggar AC, Wareham JA, Ramsey CJ, Sumners JE. Neonatal functional lung maturity relative to gestational age at delivery, fetal growth, and pregnancy characteristics in triplet births. *The journal of maternal-fetal & neonatal medicine : the official journal of the European Association of Perinatal Medicine, the Federation of Asia and Oceania Perinatal Societies, the International Society of*

Perinatal Obstet. 2012 Jan;25(1):78-83.

2363. Moore LG, Niermeyer S, Vargas E. Does chronic mountain sickness (CMS) have perinatal origins? *Respiratory Physiology and Neurobiology*. 2007 30 Sep;158(2-3):180-9.

2364. Moore Simas TA, Crawford SL, Bathgate S, Yan J, Robidoux L, Moore M, et al. Angiogenic biomarkers for prediction of early preeclampsia onset in high-risk women. *Journal of Maternal-Fetal and Neonatal Medicine*. 2014 July;27(10):1038-48.

2365. Moore Simas TA, Crawford SL, Solitro MJ, Frost SC, Meyer BA, Maynard SE. Angiogenic factors for the prediction of preeclampsia in high-risk women. *Am J Obstet Gynecol*. 2007 Sep;197(3):244.e1-8.

2366. Mor Y, Leibovitch I, Zalts R, Lotan D, Jonas P, Ramon J. Analysis of the long-term outcome of surgically corrected vesico-ureteric reflux. *BJU international*. 2003 Jul;92(1):97-100.

2367. Moraes APP, Barreto SM, Passos VMA, Golino PS, Costa JA, Vasconcelos MX. Incidence and main causes of severe maternal morbidity in sao luis, maranhao, Brazil: A longitudinal study  
Incidencia e principais causas de morbidade materna grave em sao luis, maranhao, Brasil: Estudo longitudinal. *Sao Paulo Medical Journal*. 2011 May;129(3):146-52.

2368. Morera AM, Valmalle AF, Asensio MJ, Chossegros L, Chauvin MA, Durand P, et al. A study of risk factors for hypospadias in the Rhone-Alpes region (France). *Journal of Pediatric Urology*. 2006 June;2(3):169-77.

2369. Morgan JA, Bombell S, McGuire W. Association of Plasminogen Activator Inhibitor-Type 1 (-675 4G/5G) Polymorphism with Pre-Eclampsia: Systematic Review. *PloS one*. 2013 15 Feb;8(2).

2370. Morgan L, McGinnis R, Steinhorsdottir V, Svyatova G, Zakhidova N, Lee WK, et al. InterPregGen: Genetic studies of pre-eclampsia in three continents. *Norsk Epidemiologi*. 2014;24(1-2):141-6.

2371. Morgan TK, Tolosa JE, Mele L, Wapner RJ, Spong CY, Sorokin Y, et al. Placental villous hypermaturation is associated with idiopathic preterm birth. *The journal of maternal-fetal & neonatal medicine : the official journal of the European Association of Perinatal Medicine, the Federation of Asia and Oceania Perinatal Societies, the International Society of Perinatal Obstet*. 2013 May;26(7):647-53.

2372. Morikawa M, Cho K, Yamada T, Yamada T, Sato S, Minakami H. Risk factors for eclampsia in Japan between 2005 and 2009. *International journal of gynaecology and obstetrics: the official organ of the International Federation of Gynaecology and Obstetrics*. 2012 Apr;117(1):66-8.

2373. Morikawa M, Cho K, Yamada T, Yamada T, Sato S, Minakami H. Do uterotonic drugs increase risk of abruptio placentae and eclampsia? *Arch Gynecol Obstet*. 2014 May;289(5):987-91.

2374. Morikawa M, Yamada T, Cho K, Sato S, Minakami H. Seasonal variation in the prevalence of pregnancy-induced hypertension in Japanese women. *Journal of Obstetrics and Gynaecology Research*. 2014 April;40(4):926-31.

2375. Morikawa M, Yamada T, Kataoka S, Cho K, Yamada H, Suzuki S, et al. Changes in antithrombin activity and platelet counts in the late stage of twin and triplet pregnancies. *Semin Thromb Hemost*. 2005 Jun;31(3):290-6.

2376. Morikawa M, Yamada T, Sato S, Minakami H. Prospective risk of intrauterine fetal death in monoamniotic twin pregnancies. *Twin research and human genetics : the official journal of the International Society for Twin Studies*. 2012 Aug;15(4):522-6.

2377. Morissens M, Viart P, Tecco L, Wauthy P, Michiels S, Dessy H, et al. Does congenital heart disease severely jeopardise family life and pregnancies? Obstetrical history of women with congenital heart disease in a single tertiary centre. *Cardiology in the Young*. 2013 February;23(1):41-6.

2378. Morken NH. Preterm delivery in IVF versus ICSI singleton pregnancies: a national population-based cohort. *European journal of obstetrics, gynecology, and reproductive biology*. 2011 Jan;154(1):62-6.

2379. Morken NH, Klungsoyr K, Magnus P, Skjaerven R. Pre-pregnant body mass index, gestational weight gain and the risk of operative delivery. *Acta Obstet Gynecol Scand*. 2013 Jul;92(7):809-15.

2380. Morken NH, Klungsoyr K, Skjaerven R. Perinatal mortality by gestational week and size at birth in

- singleton pregnancies at and beyond term: a nationwide population-based cohort study. *BMC pregnancy and childbirth*. 2014;14:172.
2381. Moroni G, Ponticelli C. The risk of pregnancy in patients with lupus nephritis. *J Nephrol*. 2003 Mar-Apr;16(2):161-7.
2382. Moroy P, Ustunyurt E, Tapisiz OL, Tuncay G, Aytan H, Ustunyurt OB, et al. Factors influencing the postpartum length of hospital stay in eclamptic women. *Taiwanese journal of obstetrics & gynecology*. 2007 Dec;46(4):410-3.
2383. Morris CD, Jacobson SL, Anand R, Ewell MG, Hauth JC, Curet LB, et al. Nutrient intake and hypertensive disorders of pregnancy: Evidence from a large prospective cohort. *Am J Obstet Gynecol*. 2001 Mar;184(4):643-51.
2384. Morris DH, Jones ME, Schoemaker MJ, Ashworth A, Swerdlow AJ. Determinants of age at menarche in the UK: Analyses from the breakthrough generations study. *British Journal of Cancer*. 2010 23 Nov;103(11):1760-4.
2385. Morrison ER, Miedzybrodzka ZH, Campbell DM, Haites NE, Wilson BJ, Watson MS, et al. Prothrombotic genotypes are not associated with pre-eclampsia and gestational hypertension: results from a large population-based study and systematic review. *Thromb Haemost*. 2002 May;87(5):779-85.
2386. Morriss AK, Smout E, Shennan A. The use of fetal fibronectin testing in the management of a triplet pregnancy with a short cervix. *BMJ Case Reports*. 2011.
2387. Mortensen JT, Thulstrup AM, Larsen H, Moller M, Sorensen HT. Smoking, sex of the offspring, and risk of placental abruption, placenta previa, and preeclampsia: a population-based cohort study. *Acta Obstet Gynecol Scand*. 2001 Oct;80(10):894-8.
2388. Moscuza F, Belcari F, Nardini V, Bartoli A, Domenici C, Cuttano A, et al. Correlation between placental histopathology and fetal/neonatal outcome: chorioamnionitis and funisitis are associated to intraventricular haemorrhage and retinopathy of prematurity in preterm newborns. *Gynecological endocrinology : the official journal of the International Society of Gynecological Endocrinology*. 2011 May;27(5):319-23.
2389. Moses EK, Johnson MP, Tommerdal L, Forsmo S, Curran JE, Abraham LJ, et al. Genetic association of preeclampsia to the inflammatory response gene SEPS1. *Am J Obstet Gynecol*. 2008 Mar;198(3):336.e1-5.
2390. Mostello D, Catlin TK, Roman L, Holcomb WL, Jr., Leet T. Preeclampsia in the parous woman: who is at risk? *Am J Obstet Gynecol*. 2002 Aug;187(2):425-9.
2391. Mostello D, Droll DA, Bierig SM, Cruz-Flores S, Leet T. Tertiary care improves the chance for vaginal delivery in women with preeclampsia. *Am J Obstet Gynecol*. 2003 Sep;189(3):824-9.
2392. Mostello D, Jen Chang J, Allen J, Luehr L, Shyken J, Leet T. Recurrent preeclampsia: the effect of weight change between pregnancies. *Obstet Gynecol*. 2010 Sep;116(3):667-72.
2393. Mostello D, Kallogjeri D, Tungsiripat R, Leet T. Recurrence of preeclampsia: effects of gestational age at delivery of the first pregnancy, body mass index, paternity, and interval between births. *Am J Obstet Gynecol*. 2008 Jul;199(1):55.e1-7.
2394. Motta S, Perseghin P, Consonni S, Regalia AL, Masera N. A case report of a successful monochorionic diamniotic twin pregnancy in a patient affected by sickle cell disease treated with erythrocytapheresis. *Therapeutic Apheresis and Dialysis*. 2010 February;14(1):112-5.
2395. Msukwa G, Batumba N, Drucker M, Menezes L, Ranjit R. Maternal and neonatal risk factors associated with vertical transmission of ophthalmia neonatorum in neonates receiving health care in Blantyre, Malawi. *Middle East African Journal of Ophthalmology*. 2014 July-September;21(3):240-3.
2396. Mueller BA, Chow EJ, Kamineni A, Daling JR, Fraser A, Wiggins CL, et al. Pregnancy outcomes in female childhood and adolescent cancer survivors: a linked cancer-birth registry analysis. *Archives of pediatrics & adolescent medicine*. 2009 Oct;163(10):879-86.
2397. Muetze S, Leeners B, Ortlepp JR, Kuse S, Tag CG, Weiskirchen R, et al. Maternal factor V Leiden

mutation is associated with HELLP syndrome in Caucasian women. *Acta Obstet Gynecol Scand*. 2008;87(6):635-42.

2398. Mukherj J, Kamilya G, Bhattacharyya SK. Caesarean section for the dead baby--an unhappy reality. *J Indian Med Assoc*. 2007 Jun;105(6):316, 8-9.

2399. Mukhopadhyay A, Sharma P, Dasgupta S, Dasgupta S, Sharma PP, Ghosh TK. Prediction of pre-eclampsia: comparative analysis of two screening tests. *J Indian Med Assoc*. 2012 Aug;110(8):546-7.

2400. Mulla ZD, Annavajhala V, Gonzalez-Sanchez JL, Simon MR, Nuwayhid BS. Group B streptococcal colonization and the risk of pre-eclampsia. *Epidemiol Infect*. 2013 May;141(5):1089-98.

2401. Mulla ZD, Gonzalez-Sanchez JL, Nuwayhid BS. Descriptive and clinical epidemiology of preeclampsia and eclampsia in Florida. *Ethnicity & disease*. 2007 Autumn;17(4):736-41.

2402. Mulla ZD, Nuwayhid BS, Garcia KM, Flood-Shaffer K, Van Hook JW, Hampton RM. Risk factors for a prolonged length of stay in women hospitalized for preeclampsia in Texas. *Hypertension in pregnancy : official journal of the International Society for the Study of Hypertension in Pregnancy*. 2010 Jan;29(1):54-68.

2403. Muller T, Nanan R, Rehn M, Kristen P, Dietl J. Arterial and ductus venosus Doppler in fetuses with absent or reverse end-diastolic flow in the umbilical artery: correlation with short-term perinatal outcome. *Acta Obstet Gynecol Scand*. 2002 Sep;81(9):860-6.

2404. Mumm H, Jensen DM, Sorensen JA, Andersen LL, Ravn P, Andersen M, et al. Hyperandrogenism and phenotypes of polycystic ovary syndrome are not associated with differences in obstetric outcomes. *Acta Obstetrica et Gynecologica Scandinavica*. 2015 01 Feb;94(2):204-11.

2405. Munden A, Butschek R, Tom WL, Marshall JS, Poeltler DM, Krohne SE, et al. Prospective study of infantile haemangiomas: Incidence, clinical characteristics and association with placental anomalies. *British Journal of Dermatology*. 2014;170(4):907-13.

2406. Munkhaugen J, Lydersen S, Romundstad PR, Wideroe TE, Vikse BE, Hallan S. Kidney function and future risk for adverse pregnancy outcomes: A population-based study from HUNT II, Norway. *Nephrology Dialysis Transplantation*. 2009 December;24(12):3744-50.

2407. Munnur U, Karnad DR, Bandi VD, Lapsia V, Suresh MS, Ramshesh P, et al. Critically ill obstetric patients in an American and an Indian public hospital: comparison of case-mix, organ dysfunction, intensive care requirements, and outcomes. *Intensive care medicine*. 2005 Aug;31(8):1087-94.

2408. Munoz FM. Safety of influenza vaccines in pregnant women. *American Journal of Obstetrics and Gynecology*. 2012 September;207(3 SUPPL.):S33-S7.

2409. Munoz-Hernandez R, Miranda ML, Stiefel P, Lin RZ, Praena-Fernandez JM, Dominguez-Simeon MJ, et al. Decreased level of cord blood circulating endothelial colony-forming cells in preeclampsia. *Hypertension*. 2014 Jul;64(1):165-71.

2410. Murakami M, Ohmichi M, Takahashi T, Shibata A, Fukao A, Morisaki N, et al. Prepregnancy body mass index as an important predictor of perinatal outcomes in Japanese. *Arch Gynecol Obstet*. 2005 Apr;271(4):311-5.

2411. Murakami S, Saitoh M, Kubo T, Koyama T, Kobayashi M. Renal disease in women with severe preeclampsia or gestational proteinuria. *Obstet Gynecol*. 2000 Dec;96(6):945-9.

2412. Murali AR, Devarbhavi H, Venkatachala PR, Singh R, Sheth KA. Factors that predict 1-month mortality in patients with pregnancy-specific liver disease. *Clinical Gastroenterology and Hepatology*. 2014 January;12(1):109-13.

2413. Murata Y, Itakura A, Matsuzawa K, Okumura A, Wakai K, Mizutani S. Possible antenatal and perinatal related factors in development of cystic periventricular leukomalacia. *Brain & development*. 2005 Jan;27(1):17-21.

2414. Murphy CM, Murad K, Deane R, Byrne B, Geary MP, McAuliffe FM. Severe maternal morbidity for 2004-2005 in the three Dublin maternity hospitals. *European journal of obstetrics, gynecology, and reproductive biology*. 2009 Mar;143(1):34-7.

2415. Murphy DJ, Macleod M, Bahl R, Strachan B. A cohort study of maternal and neonatal morbidity in relation to use of sequential instruments at operative vaginal delivery. *European Journal of Obstetrics Gynecology and Reproductive Biology*. 2011 May;156(1):41-5.
2416. Murphy DJ, Stirrat GM. Mortality and morbidity associated with early-onset preeclampsia. *Hypertension in pregnancy*. 2000;19(2):221-31.
2417. Murphy RP, Donoghue C, Nallen RJ, D'Mello M, Regan C, Whitehead AS, et al. Prospective evaluation of the risk conferred by factor V Leiden and thermolabile methylenetetrahydrofolate reductase polymorphisms in pregnancy. *Arterioscler Thromb Vasc Biol*. 2000 Jan;20(1):266-70.
2418. Murphy VE, Gibson PG, Smith R, Clifton VL. Asthma during pregnancy: mechanisms and treatment implications. *The European respiratory journal*. 2005 Apr;25(4):731-50.
2419. Murray D, O'Riordan M, Geary M, Phillips R, Clarke T, McKenna P. The HELLP syndrome: maternal and perinatal outcome. *Irish medical journal*. 2001 Jan;94(1):16-8.
2420. Murray N, Homer CS, Davis GK, Curtis J, Mangos G, Brown MA. The clinical utility of routine urinalysis in pregnancy: a prospective study. *Med J Aust*. 2002 Nov 4;177(9):477-80.
2421. Mustafa Adelaja L, Olufemi Taiwo O. Maternal and fetal outcome of obstetric emergencies in a tertiary health institution in South-Western Nigeria. *ISRN Obstetrics and Gynecology*. 2011(160932).
2422. Muy-Rivera M, Vadachkoria S, Woelk GB, Qiu C, Mahomed K, Williams MA. Maternal plasma VEGF, sVEGF-R1, and PIGF concentrations in preeclamptic and normotensive pregnant Zimbabwean women. *Physiological Research*. 2005;54(6):611-22.
2423. Myatt L, Clifton RG, Roberts JM, Spong CY, Hauth JC, Varner MW, et al. The utility of uterine artery Doppler velocimetry in prediction of preeclampsia in a low-risk population. *Obstet Gynecol*. 2012 Oct;120(4):815-22.
2424. Myatt L, Clifton RG, Roberts JM, Spong CY, Wapner RJ, Thorp JM, Jr., et al. Can changes in angiogenic biomarkers between the first and second trimesters of pregnancy predict development of pre-eclampsia in a low-risk nulliparous patient population? *Bjog*. 2013 Sep;120(10):1183-91.
2425. Myatt L, Redman CW, Staff AC, Hansson S, Wilson ML, Laivuori H, et al. Strategy for standardization of preeclampsia research study design. *Hypertension*. 2014 June;63(6):1293-301.
2426. Myers J, Hall C, Wareing M, Gillham J, Baker P. The effect of maternal characteristics on endothelial-dependent relaxation of myometrial arteries. *European journal of obstetrics, gynecology, and reproductive biology*. 2006 Feb 1;124(2):158-63.
2427. Myers JE, Kenny LC, McCowan LME, Chan EHY, Dekker GA, Poston L, et al. Angiogenic factors combined with clinical risk factors to predict preterm pre-eclampsia in nulliparous women: A predictive test accuracy study. *BJOG: An International Journal of Obstetrics and Gynaecology*. 2013 September;120(10):1215-23.
2428. Myers JE, Tuytten R, Thomas G, Laroy W, Kas K, Vanpoucke G, et al. Integrated proteomics pipeline yields novel biomarkers for predicting preeclampsia. *Hypertension*. 2013 Jun;61(6):1281-8.
2429. Myles TD, Santolaya J. Maternal and neonatal outcomes in patients with a prolonged second stage of labor. *Obstet Gynecol*. 2003 Jul;102(1):52-8.
2430. Na S, Shim JY, Jung BK, Won HS, Lee PR, Kim A. Urotensin-II 143 G/A polymorphism is not associated with the risk of preeclampsia in Korean women. *American journal of reproductive immunology (New York, NY : 1989)*. 2011 Nov;66(5):423-7.
2431. Nabatian S, Quinn P, Brookfield L, Lakier J. Acute coronary syndrome and preeclampsia. *Obstetrics and Gynecology*. 2005 November;106(5 II):1204-6.
2432. Nabavizadeh SH, Malekzadeh M, Mousavizadeh A, Shirazi HRG, Ghaffari P, Karshenas N, et al. Retrospective study of factors related to preterm labor in Yasuj, Iran. *International Journal of General Medicine*. 2012;5:1013-7.
2433. Nadeau M, Best L. Recruiting American Indian women for a genetic epidemiology study. *Public health genomics*. 2010;13(7-8):389-95.

2434. Nafstad P, Magnus P, Jaakkola JJ. Risk of childhood asthma and allergic rhinitis in relation to pregnancy complications. *The Journal of allergy and clinical immunology*. 2000 Nov;106(5):867-73.
2435. Nagalakshmi CS, Devaki RN, Akila P, Suma KB, Prashant V, Suma MN, et al. Exploration of the clinico-biochemical parameters to explain the altered renal mechanisms in gestational diabetes mellitus. *Journal of Clinical and Diagnostic Research*. 2012 01 May;6(3):369-71.
2436. Nagtegaal MJ, van Rijswijk S, McGavin S, Dekker G. Use of uterine Doppler in an Australian level II maternity hospital. *The Australian & New Zealand journal of obstetrics & gynaecology*. 2005 Oct;45(5):424-9.
2437. Nagy S, Bush M, Stone J, Lapinski RH, Gardo S. Clinical significance of subchorionic and retroplacental hematomas detected in the first trimester of pregnancy. *Obstet Gynecol*. 2003 Jul;102(1):94-100.
2438. Nagy S, Bush MC, Berkowitz R, Fishbein TM, Gomez-Lobo V. Pregnancy outcome in liver transplant recipients. *Obstet Gynecol*. 2003 Jul;102(1):121-8.
2439. Naheed I, Malik SS, Akhtar M, Khatri N, Majeed T. An audit of increasing cesarean section rate in primigravidas. *Pakistan Journal of Medical and Health Sciences*. 2014 01 Oct;8(4):1012-5.
2440. Nahuis MJ, Oude Lohuis EJ, Bayram N, Hompes PGA, Oosterhuis GJE, Van Der Veen F, et al. Pregnancy complications and metabolic disease in women with clomiphene citrate-resistant anovulation randomized to receive laparoscopic electrocautery of the ovaries or ovulation induction with gonadotropins: A 10-year follow-up. *Fertility and sterility*. 2014 January;101(1):270-4.
2441. Naidoo P, Erasmus I, Jeebodh J, Nicolaou E, van Gelderen CJ. Nuchal translucency as a method of first-trimester screening for aneuploidy. *South African Medical Journal*. 2008 April;98(4):295-9.
2442. Najmi RS. Distribution of birthweights of hospital born Pakistani infants. *JPMMA The Journal of the Pakistan Medical Association*. 2000 Apr;50(4):121-4.
2443. Nakagawa E, Hoffmann M. Young women's stroke etiology differs from that in young men: An analysis of 511 patients. *Neurology International*. 2013 16 Sep;5(3):37-40.
2444. Nakhai-Pour HR, Rey E, Berard A. Discontinuation of antihypertensive drug use during the first trimester of pregnancy and the risk of preeclampsia and eclampsia among women with chronic hypertension. *American Journal of Obstetrics and Gynecology*. 2009 August;201(2):180.e1-.e8.
2445. Nakimuli A, Elliott AM, Kaleebu P, Moffett A, Mirembe F. Hypertension persisting after pre-eclampsia: a prospective cohort study at Mulago Hospital, Uganda. *PloS one*. 2013;8(12):e85273.
2446. Nakimuli A, Mbalinda SN, Nabirye RC, Kakaire O, Nakubulwa S, Osinde MO, et al. Still births, neonatal deaths and neonatal near miss cases attributable to severe obstetric complications: A prospective cohort study in two referral hospitals in Uganda. *BMC Pediatrics*. 2015 April 17;15(1).
2447. Namazy J, Cabana MD, Scheuerle AE, Thorp JM, Chen H, Carrigan G, et al. The Xolair Pregnancy Registry (EXPECT): The safety of omalizumab use during pregnancy. *Journal of Allergy and Clinical Immunology*. 2015 01 Feb;135(2):407-12.
2448. Namdev S, Bhat V, Adhisivam B, Zachariah B. Oxidative stress and antioxidant status among neonates born to mothers with pre-eclampsia and their early outcome. *Journal of Maternal-Fetal and Neonatal Medicine*. 2014 September;27(14):1481-4.
2449. Nankabirwa V, Tumwine JK, Tylleskar T, Nankunda J, Sommerfelt H. Perinatal mortality in eastern Uganda: A community based prospective cohort study. *PloS one*. 2011;6(5).
2450. Napolitano R, Rajakulasingam R, Memmo A, Bhide A, Thilaganathan B. Uterine artery Doppler screening for pre-eclampsia: comparison of the lower, mean and higher first-trimester pulsatility indices. *Ultrasound Obstet Gynecol*. 2011 May;37(5):534-7.
2451. Napolitano R, Santo S, D'Souza R, Bhide A, Thilaganathan B. Sensitivity of higher, lower and mean second-trimester uterine artery Doppler resistance indices in screening for pre-eclampsia. *Ultrasound Obstet Gynecol*. 2010 Nov;36(5):573-6.
2452. Naqi R, Ahsan H, Azeemuddin M. Posterior reversible encephalopathy syndrome: a case series in

patients with eclampsia. *JPMA The Journal of the Pakistan Medical Association*. 2010 May;60(5):394-7.

2453. Naqvi R, Noor H, Ambareen S, Khan H, Haider A, Jafri N, et al. Outcome of pregnancy in renal allograft recipients: SIUT experience. *Transplant Proc*. 2006 Sep;38(7):2001-2.

2454. Narang S, Roy J, Stevens TP, Butler-O'Hara M, Mullen CA, D'Angio CT. Risk factors for umbilical venous catheter-associated thrombosis in very low birth weight infants. *Pediatric blood & cancer*. 2009 Jan;52(1):75-9.

2455. Naruse K, Sado T, Noguchi T, Tsunemi T, Yoshida S, Akasaka J, et al. Peripheral RAGE (receptor for advanced glycation endproducts)-ligands in normal pregnancy and preeclampsia: novel markers of inflammatory response. *J Reprod Immunol*. 2012 Mar;93(2):69-74.

2456. Nasiri M, Faghihzadeh S, Majd HA, Zayeri F, Kariman N, Ardebili NS. Longitudinal discriminant analysis of hemoglobin level for predicting preeclampsia. *Iranian Red Crescent Medical Journal*. 2015;17(3):1-7.

2457. Nasiri R, Ahmadi Shadmehri A, Khajeh Ghiassi P, Sarafraz Yazdi M, Baf MMF. Association of meteorological factors and seasonality with preeclampsia: A 5-year study in northeast of Iran. *Clinical and Experimental Hypertension*. 2014 01 Dec;36(8):586-9.

2458. Natarajan U, Pym A, McDonald C, Velisetty P, Edwards SG, Hay P, et al. Safety of nevirapine in pregnancy. *HIV Medicine*. 2007 January;8(1):64-9.

2459. Natu N, Khandelwal S, Kumar R, Dave A. Maternal and perinatal outcome of women with sickle cell disease of a tribal population in Central India. *Hemoglobin*. 2014;38(2):91-4.

2460. Naver KV, Grinstead J, Larsen SO, Hedley PL, Jorgensen FS, Christiansen M, et al. Increased risk of preterm delivery and pre-eclampsia in women with polycystic ovary syndrome and hyperandrogenaemia. *Bjog*. 2014 Apr;121(5):575-81.

2461. Navi Khan GA, Ishrat N, Afshan Sabzposh N. Blood pressure pattern in pregnant women of different body mass index in three trimesters of pregnancy. *Indian Journal of Public Health Research and Development*. 2013 July-September;4(3):98-102.

2462. Naylor CS, Porto M, Cohen B, Garite TJ. Pregnancy outcome in Hispanic patients with unexplained positive triple marker screening for Down syndrome. *The Journal of maternal-fetal medicine*. 2001 Feb;10(1):20-2.

2463. Ndayambagye EB, Nakalembe M, Kaye DK. Factors associated with persistent hypertension after puerperium among women with pre-eclampsia/eclampsia in Mulago hospital, Uganda. *BMC pregnancy and childbirth*. 2010;10:12.

2464. Ndukwe KC, Ugboko VI, Ogunlola IO, Orji EO, Makinde ON. Orofacial injuries in eclamptic Nigerians. *Afr J Reprod Health*. 2004 Dec;8(3):147-51.

2465. Ndungu JR, Amayo A, Qureshi ZP, Sekadde Kigundu C. Gestational thyrotoxicosis associated with emesis in early pregnancy. *East African Medical Journal*. 2009 February;86(2):55-8.

2466. Negishi Y, Otsubo Y. Longitudinal follow up of delayed eclampsia using cerebroangiography. *The journal of obstetrics and gynaecology research*. 2008 Aug;34(4 Pt 2):638-40.

2467. Negrato CA, Jovanovic L, Tambascia MA, Geloneze B, Dias A, Calderon Ide M, et al. Association between insulin resistance, glucose intolerance, and hypertension in pregnancy. *Metab Syndr Relat Disord*. 2009 Feb;7(1):53-9.

2468. Negrato CA, Rafacho A, Negrato G, Teixeira MF, Araujo CA, Vieira L, et al. Glargine vs. NPH insulin therapy in pregnancies complicated by diabetes: an observational cohort study. *Diabetes Res Clin Pract*. 2010 Jul;89(1):46-51.

2469. Negro R, Stagnaro-Green A. Diagnosis and management of subclinical hypothyroidism in pregnancy. *Bmj*. 2014;349:g4929.

2470. Nelson DB, Lucke AM, McIntire DD, Sanchez PJ, Leveno KJ, Chalak LF. Obstetric antecedents to body-cooling treatment of the newborn infant. *Am J Obstet Gynecol*. 2014 Aug;211(2):155.e1-6.

2471. Nelson KB, Grether JK, Dambrosia JM, Walsh E, Kohler S, Satyanarayana G, et al. Neonatal

- cytokines and cerebral palsy in very preterm infants. *Pediatr Res*. 2003 Apr;53(4):600-7.
2472. Nerenberg KA, Johnson JA, Leung B, Savu A, Ryan EA, Chik CL, et al. Risks of gestational diabetes and preeclampsia over the last decade in a cohort of Alberta women. *Journal of obstetrics and gynaecology Canada : JOGC = Journal d'obstetrique et gynecologie du Canada : JOGC*. 2013 Nov;35(11):986-94.
2473. Ness RB, Markovic N, Bass D, Harger G, Roberts JM. Family history of hypertension, heart disease, and stroke among women who develop hypertension in pregnancy. *Obstet Gynecol*. 2003 Dec;102(6):1366-71.
2474. Ness RB, Markovic N, Harger G, Day R. Barrier methods, length of preconception intercourse, and preeclampsia. *Hypertension in pregnancy*. 2004;23(3):227-35.
2475. Ness RB, Zhang J, Bass D, Klebanoff MA. Interactions between smoking and weight in pregnancies complicated by preeclampsia and small-for-gestational-age birth. *American journal of epidemiology*. 2008 Aug 15;168(4):427-33.
2476. Nestler A, Rylander R, Kolisek M, Nielsen T, Odman N, Vormann J, et al. Blood pressure in pregnancy and magnesium sensitive genes. *Pregnancy Hypertension*. 2014 January;4(1):41-5.
2477. Neto LV, De Almeida CA, Da Costa SM, Vaisman M. Prospective evaluation of pregnant women with hypothyroidism: implications for treatment. *Gynecological endocrinology : the official journal of the International Society of Gynecological Endocrinology*. 2007 Mar;23(3):138-41.
2478. Nevis IF, Sontrop JM, Clark WF, Huang A, McDonald S, Thabane L, et al. Hypertension in pregnancy after *Escherichia coli* O157:H7 gastroenteritis: a cohort study. *Hypertension in pregnancy*. 2013 Nov;32(4):390-400.
2479. Newman MG, Lindsay MK, Graves W. Cigarette smoking and pre-eclampsia: their association and effects on clinical outcomes. *The Journal of maternal-fetal medicine*. 2001 Jun;10(3):166-70.
2480. Newstead J, von Dadelszen P, Magee LA. Preeclampsia and future cardiovascular risk. *Expert review of cardiovascular therapy*. 2007 Mar;5(2):283-94.
2481. Nezvalova-Henriksen K, Spigset O, Nordeng H. Triptan exposure during pregnancy and the risk of major congenital malformations and adverse pregnancy outcomes: Results from the Norwegian mother and child cohort study. *Headache*. 2010 April;50(4):563-75.
2482. Ng VK, Lo TK, Tsang HH, Lau WL, Leung WC. Intensive care unit admission of obstetric cases: a single centre experience with contemporary update. *Hong Kong medical journal = Xianggang yi xue za zhi / Hong Kong Academy of Medicine*. 2014 Feb;20(1):24-31.
2483. Ngowa JD, Ngassam AN, Dohbit JS, Nzedjom C, Kasia JM. Pregnancy outcome at advanced maternal age in a group of African women in two teaching Hospitals in Yaounde, Cameroon. *The Pan African medical journal*. 2013;14:134.
2484. Nguku SW, Wanyoike-Gichuhi J, Aywak AA. Biophysical profile scores and resistance indices of the umbilical artery as seen in patients with pregnancy induced hypertension. *East Afr Med J*. 2006 Mar;83(3):96-101.
2485. Nguyen BT, Cheng YW, Snowden JM, Esakoff TF, Frias AE, Caughey AB. The effect of race/ethnicity on adverse perinatal outcomes among patients with gestational diabetes mellitus. *Am J Obstet Gynecol*. 2012 Oct;207(4):322.e1-6.
2486. Nguyen G, Garcia RT, Nguyen N, Trinh H, Keeffe EB, Nguyen MH. Clinical course of hepatitis B virus infection during pregnancy. *Alimentary pharmacology & therapeutics*. 2009 Apr 1;29(7):755-64.
2487. Nguyen N, Savitz DA, Thorp JM. Risk factors for preterm birth in Vietnam. *International journal of gynaecology and obstetrics: the official organ of the International Federation of Gynaecology and Obstetrics*. 2004 Jul;86(1):70-8.
2488. Nguyen NC, Evenson KR, Savitz DA, Chu H, Thorp JM, Daniels JL. Physical activity and maternal-fetal circulation measured by Doppler ultrasound. *Journal of perinatology : official journal of the California Perinatal Association*. 2013 Feb;33(2):87-93.



2489. Nguyen TN, Faulkner D, Frayne JS, Allen S, Hauck YL, Rock D, et al. Obstetric and neonatal outcomes of pregnant women with severe mental illness at a specialist antenatal clinic. *The Medical journal of Australia*. 2013 05 Aug;199(3 Supplement):S26-S9.
2490. Ni J, Zhou LX, Hao HL, Liu Q, Yao M, Li ML, et al. The clinical and radiological spectrum of posterior reversible encephalopathy syndrome: a retrospective series of 24 patients. *Journal of neuroimaging : official journal of the American Society of Neuroimaging*. 2011 Jul;21(3):219-24.
2491. Ni TL, Huang CC, Guo NW. Executive function deficit in preschool children born very low birth weight with normal early development. *Early Human Development*. 2011 February;87(2):137-41.
2492. Nicolaides KH, Bindra R, Turan OM, Chefetz I, Sammar M, Meiri H, et al. A novel approach to first-trimester screening for early pre-eclampsia combining serum PP-13 and Doppler ultrasound. *Ultrasound in Obstetrics and Gynecology*. 2006 January;27(1):13-7.
2493. Nielsen LR, Muller C, Damm P, Mathiesen ER. Reduced prevalence of early preterm delivery in women with Type 1 diabetes and microalbuminuria--possible effect of early antihypertensive treatment during pregnancy. *Diabetic medicine : a journal of the British Diabetic Association*. 2006 Apr;23(4):426-31.
2494. Nielsen TF, Rylander R. Urinary calcium and magnesium excretion relates to increase in blood pressure during pregnancy. *Arch Gynecol Obstet*. 2011 Mar;283(3):443-7.
2495. Niessner A, Steiner S, Speidl WS, Pleiner J, Seidinger D, Maurer G, et al. Simvastatin suppresses endotoxin-induced upregulation of toll-like receptors 4 and 2 in vivo. *Atherosclerosis*. 2006 Dec;189(2):408-13.
2496. Niittyvuopio R, Juvonen E, Kaaja R, Oksanen K, Hallman H, Timonen T, et al. Pregnancy in essential thrombocythaemia: experience with 40 pregnancies. *Eur J Haematol*. 2004 Dec;73(6):431-6.
2497. Nijdam ME, Timmerman MR, Franx A, Bruinse HW, Numans ME, Grobbee DE, et al. Cardiovascular risk factor assessment after pre-eclampsia in primary care. *BMC Fam Pract*. 2009;10:77.
2498. Nili F, McLeod L, O'Connell C, Sutton E, McMillan D. Outcomes of pregnancies in women with suspected antiphospholipid syndrome. *Journal of Neonatal-Perinatal Medicine*. 2013;6(3):225-30.
2499. Nili F, McLeod L, O'Connell C, Sutton E, McMillan D. Maternal and neonatal outcomes in pregnancies complicated by systemic lupus erythematosus: a population-based study. *Journal of obstetrics and gynaecology Canada : JOGC = Journal d'obstetrique et gynecologie du Canada : JOGC*. 2013 Apr;35(4):323-8.
2500. Nilsen RM, Bjorke-Monsen AL, Midttun O, Nygard O, Pedersen ER, Ulvik A, et al. Maternal tryptophan and kynurenine pathway metabolites and risk of preeclampsia. *Obstetrics and Gynecology*. 2012 June;119(6):1243-50.
2501. Nilsen RM, Vollset SE, Gjessing HK, Skjaerven R, Melve KK, Schreuder P, et al. Self-selection and bias in a large prospective pregnancy cohort in Norway. *Paediatric and perinatal epidemiology*. 2009 November;23(6):597-608.
2502. Nilsen TI, Romundstad PR, Troisi R, Potischman N, Vatten LJ. Birth size and colorectal cancer risk: a prospective population based study. *Gut*. 2005 Dec;54(12):1728-32.
2503. Ning Y, Williams MA, Muy-Rivera M, Leisenring WM, Luthy DA. Relationship of maternal plasma leptin and risk of pre-eclampsia: a prospective study. *The journal of maternal-fetal & neonatal medicine : the official journal of the European Association of Perinatal Medicine, the Federation of Asia and Oceania Perinatal Societies, the International Society of Perinatal Obstet*. 2004 Mar;15(3):186-92.
2504. Ning Y, Williams MA, Vadachkoria S, Muy-Rivera M, Frederick IO, Luthy DA. Maternal plasma concentrations of insulinlike growth factor-1 and insulinlike growth factor-binding protein-1 in early pregnancy and subsequent risk of preeclampsia. *Clin Biochem*. 2004 Nov;37(11):968-73.
2505. Niromanesh S, Dastgerdy E, Shirazi M, Sharbaf FR, Khazaeipour Z. Association of hypertriglyceridaemia with pre-eclampsia, preterm birth, gestational diabetes and uterine artery pulsatility index. *National Medical Journal of India*. 2012 September - October;25(5):265-7.

2506. Niromanesh S, Laghai S, Mosavi-Jarrahi A. Supplementary calcium in prevention of pre-eclampsia. *International Journal of Gynecology and Obstetrics*. 2001;74(1):17-21.
2507. Nisell H, Palm K, Wolff K. Prediction of maternal and fetal complications in preeclampsia. *Acta Obstet Gynecol Scand*. 2000 Jan;79(1):19-23.
2508. Nitsche JF, Jiang SW, Brost BC. Toll-like receptor-2 and toll-like receptor-4 expression on maternal neutrophils during pregnancy. *American journal of reproductive immunology (New York, NY : 1989)*. 2010 Dec;64(6):427-34.
2509. Noble LS, Kutteh WH, Lashey N, Franklin RD, Herrada J. Antiphospholipid antibodies associated with recurrent pregnancy loss: prospective, multicenter, controlled pilot study comparing treatment with low-molecular-weight heparin versus unfractionated heparin. *Fertility and sterility*. 2005 Mar;83(3):684-90.
2510. Nogel SC, Deiters L, Stemmler M, Rascher W, Trollmann R. Preterm small-for-gestational age children: Predictive role of gestational age for mental development at the age of 2years. *Brain and Development*. 2015 01 Apr;37(4):394-401.
2511. Nohr EA, Timpson NJ, Andersen CS, Davey Smith G, Olsen J, Sorensen TI. Severe obesity in young women and reproductive health: the Danish National Birth Cohort. *PloS one*. 2009;4(12):e8444.
2512. Nohr EA, Vaeth M, Baker JL, Sorensen TIA, Olsen J, Rasmussen KM. Combined associations of prepregnancy body mass index and gestational weight gain with the outcome of pregnancy. *American Journal of Clinical Nutrition*. 2008 01 Jun;87(6):1750-9.
2513. Nolan CJ. Controversies in gestational diabetes. *Best Practice and Research: Clinical Obstetrics and Gynaecology*. 2011 February;25(1):37-49.
2514. Noori M, Donald AE, Angelakopoulou A, Hingorani AD, Williams DJ. Prospective study of placental angiogenic factors and maternal vascular function before and after preeclampsia and gestational hypertension. *Circulation*. 2010 Aug 3;122(5):478-87.
2515. Noraihan MN, Sharda P, Jammal AB. Report of 50 cases of eclampsia. *The journal of obstetrics and gynaecology research*. 2005 Aug;31(4):302-9.
2516. Nordby KC, Irgens LM, Kristensen P. Immunological exposures in Norwegian agriculture and pre-eclampsia. *Paediatric and perinatal epidemiology*. 2006 November;20(6):462-70.
2517. Nordin NM, Fen CK, Isa S, Symonds EM. Is grandmultiparity a significant risk factor in this new millennium? *Malaysian Journal of Medical Sciences*. 2006 July;13(2):52-60.
2518. Nordin NM, Wei JW, Naing NN, Symonds EM. Comparison of maternal-fetal outcomes in gestational diabetes and lesser degrees of glucose intolerance. *The journal of obstetrics and gynaecology research*. 2006 Feb;32(1):107-14.
2519. Norman SM, Odibo AO, Macones GA, Dicke JM, Crane JP, Cahill AG. Ultrasound-detected subchorionic hemorrhage and the obstetric implications. *Obstet Gynecol*. 2010 Aug;116(2 Pt 1):311-5.
2520. Norrman E, Bergh C, Wennerholm UB. Pregnancy outcome and long-term follow-up after in vitro fertilization in women with renal transplantation. *Human reproduction*. 2015 01 Jan;30(1):205-13.
2521. North RA, McCowan LME, Dekker GA, Poston L, Chan EHY, Stewart AW, et al. Clinical risk prediction for pre-eclampsia in nulliparous women: Development of model in international prospective cohort. *Bmj*. 2011 23 Apr;342(7803).
2522. North RA, Taylor R, Li Zhou R, Schellenberg JC. The relationship of smoking, preeclampsia, and secretory component. *Am J Obstet Gynecol*. 2000 Jul;183(1):136-9.
2523. North RA, Taylor RS, Gunn TR. Pregnancy outcome in women with reflux nephropathy and the inheritance of vesico-ureteric reflux. *The Australian & New Zealand journal of obstetrics & gynaecology*. 2000 Aug;40(3):280-5.
2524. Norum J, Heyd A, Hjelseth B, Svee T, Murer FA, Erlandsen R, et al. Quality of obstetric care in the sparsely populated sub-arctic area of Norway 2009-2011. *BMC pregnancy and childbirth*. 2013;13:175.
2525. Noyan T, Guler A, Sekeroglu MR, Kamaci M. Serum advanced oxidation protein products,

- myeloperoxidase and ascorbic acid in pre-eclampsia and eclampsia. *The Australian & New Zealand journal of obstetrics & gynaecology*. 2006 Dec;46(6):486-91.
2526. Nucci LB, Schmidt MI, Duncan BB, Fuchs SC, Fleck ET, Santos Britto MM. Nutritional status of pregnant women: Prevalence and associated pregnancy outcomes. *Revista de Saude Publica*. 2001;35(6):502-7.
2527. Nuchpramool P, Hanprasertpong T. Pregnancy outcome and predictive factors for adverse pregnancy outcomes of Cephalopelvic disproportion pregnancies in a resource-limited setting with an efficient referral system. *Journal of the Medical Association of Thailand*. 2014 01 Nov;97(11):1126-32.
2528. Nugteren JJ, Snijder CA, Hofman A, Jaddoe VW, Steegers EA, Burdorf A. Work-related maternal risk factors and the risk of pregnancy induced hypertension and preeclampsia during pregnancy. *The Generation R Study*. *PLoS one*. 2012;7(6):e39263.
2529. Nurk E, Tell GS, Refsum H, Ueland PM, Vollset SE. Factor V Leiden, pregnancy complications and adverse outcomes: the Hordaland Homocysteine Study. *QJM : monthly journal of the Association of Physicians*. 2006 May;99(5):289-98.
2530. Nuthalapaty FS, Beck MM, Mabie WC. Complications of central venous catheters during pregnancy and postpartum: a case series. *Am J Obstet Gynecol*. 2009 Sep;201(3):311.e1-5.
2531. Nwagha UI, Nwachukwu D, Dim C, Ibekwe PC, Onyebuchi A. Maternal mortality trend in South East Nigeria: less than a decade to the millennium developmental goals. *J Womens Health (Larchmt)*. 2010 Feb;19(2):323-7.
2532. Nwankwo OE, Katchy AU. Limb gangrene following treatment of limb injury by traditional bone setter (Tbs): a report of 15 consecutive cases. *Niger Postgrad Med J*. 2005 Mar;12(1):57-60.
2533. Nwobodo EI, Panti A. Adolescent maternal mortality in North-west Nigeria. *West Afr J Med*. 2012 Oct-Dec;31(4):224-6.
2534. Obor VO, Tabowei TO, Jemikalajah JJ, Bosah JO, Agu D. Pregnancy outcomes among nulliparous teenagers in suburban Nigeria. *Journal of Obstetrics and Gynaecology*. 2003;23(2):166-9.
2535. O'Brien DJ, Hooker EA, Hignite J, Maughan E. Long-distance fixed-wing transport of obstetrical patients. *South Med J*. 2004 Sep;97(9):816-8.
2536. O'Brien JM, Shumate SA, Satchwell SL, Milligan DA, Barton JR. Maternal benefit of corticosteroid therapy in patients with HELLP (hemolysis, elevated liver enzymes, and low platelet count) syndrome: impact on the rate of regional anesthesia. *Am J Obstet Gynecol*. 2002 Mar;186(3):475-9.
2537. O'Brien LM, Bullough AS, Chames MC, Shelgikar AV, Armitage R, Guilleminault C, et al. Hypertension, snoring, and obstructive sleep apnoea during pregnancy: a cohort study. *Bjog*. 2014 Dec;121(13):1685-93.
2538. O'Brien LM, Bullough AS, Owusu JT, Tremblay KA, Brincat CA, Chames MC, et al. Pregnancy-onset habitual snoring, gestational hypertension, and preeclampsia: prospective cohort study. *Am J Obstet Gynecol*. 2012 Dec;207(6):487.e1-9.
2539. O'Brien LM, Owusu JT, Swanson LM. Habitual snoring and depressive symptoms during pregnancy. *BMC pregnancy and childbirth*. 2013;13:113.
2540. O'Brien TE, Ray JG, Chan WS. Maternal body mass index and the risk of preeclampsia: a systematic overview. *Epidemiology (Cambridge, Mass)*. 2003 May;14(3):368-74.
2541. Ocheni S, Onah HE, Ibegbulam OG, Eze MI. Pregnancy outcomes in patients with sickle cell disease in Enugu, Nigeria. *Niger J Med*. 2007 Jul-Sep;16(3):252-5.
2542. Ochsenein-Kolble N, Roos M, Gasser T, Huch R, Huch A, Zimmermann R. Cross sectional study of automated blood pressure measurements throughout pregnancy. *Bjog*. 2004 Apr;111(4):319-25.
2543. Ochshorn Y, Kupferminc MJ, Eldor A, Wolman I, Lessing JB, Yaron Y. Second-trimester maternal serum alpha-fetoprotein (MSAFP) is elevated in women with adverse pregnancy outcome associated with inherited thrombophilias. *Prenatal diagnosis*. 2001 Aug;21(8):658-61.
2544. Odden N, Henriksen T, Holter E, Grete Skar A, Tjæde T, Morkrid L. Serum adiponectin

concentration prior to clinical onset of preeclampsia. *Hypertension in pregnancy*. 2006;25(2):129-42.

2545. Odden N, Henriksen T, Morkrid L. Serum soluble urokinase plasminogen activator receptor (suPAR) in early pregnancy prior to clinical onset of preeclampsia. *Acta Obstet Gynecol Scand*. 2012 Oct;91(10):1226-32.

2546. Odegard RA, Vatten LJ, Nilsen ST, Salvesen KA, Vefring H, Austgulen R. Umbilical cord plasma interleukin-6 and fetal growth restriction in preeclampsia: a prospective study in Norway. *Obstet Gynecol*. 2001 Aug;98(2):289-94.

2547. Odell CD, Kotelchuck M, Chetty VK, Fowler J, Stubblefield PG, Orejuela M, et al. Maternal hypertension as a risk factor for low birth weight infants: Comparison of Haitian and African-American women. *Maternal and Child Health Journal*. 2006 January;10(1):39-46.

2548. Odendaal HJ, Schoeman J, Grove D, de Jager M, Theron GB, Orth H, et al. The association between *Chlamydia trachomatis* genital infection and spontaneous preterm labour. *South African Journal of Obstetrics and Gynaecology*. 2006 November;12(3):146-9.

2549. Odibo AO, Goetzinger KR, Huster KM, Christiansen JK, Odibo L, Tuuli MG. Placental volume and vascular flow assessed by 3D power Doppler and adverse pregnancy outcomes. *Placenta*. 2011 Mar;32(3):230-4.

2550. Odibo AO, Zhong Y, Goetzinger KR, Odibo L, Bick JL, Bower CR, et al. First-trimester placental protein 13, PAPP-A, uterine artery Doppler and maternal characteristics in the prediction of pre-eclampsia. *Placenta*. 2011 Aug;32(8):598-602.

2551. O'Donoghue K. Pregnancy and the risk of autoimmune disease: An exploration. *Chimerism*. 2011 July/August/September;2(3):84-5.

2552. O'Dwyer V, O'Toole F, Darcy S, Farah N, Kennelly MM, Turner MJ. Maternal obesity and gestational weight gain. *Journal of obstetrics and gynaecology : the journal of the Institute of Obstetrics and Gynaecology*. 2013 Oct;33(7):671-4.

2553. Ofir D, Kessous R, Belfer N, Lifshitz T, Sheiner E. The influence of visual impairment on pregnancy outcomes. *Arch Gynecol Obstet*. 2015 Mar;291(3):519-23.

2554. O'Gara PT, Shepard JAO, Yared K, Sohani AR. Case 39-2009: A 28-year-old pregnant woman with acute cardiac failure. *New England Journal of Medicine*. 2009 17 Dec;361(25):2462-73+04.

2555. Ogge G, Chaiworapongsa T, Romero R, Hussein Y, Kusanovic JP, Yeo L, et al. Placental lesions associated with maternal underperfusion are more frequent in early-onset than in late-onset preeclampsia. *J Perinat Med*. 2011 Nov;39(6):641-52.

2556. Oglænd B, Forman MR, Romundstad PR, Nilsen ST, Vatten LJ. Blood pressure in early adolescence in the offspring of preeclamptic and normotensive pregnancies. *J Hypertens*. 2009 Oct;27(10):2051-4.

2557. Oglænd B, Nilsen ST, Forman MR, Vatten LJ. Pubertal development in daughters of women with pre-eclampsia. *Arch Dis Child*. 2011 Aug;96(8):740-3.

2558. Ogle R, Jauniaux E, Pahal GS, Dell E, Sheldrake A, Rodeck C. Serum screening for Down syndrome and adverse pregnancy outcomes: a case-controlled study. *Prenatal diagnosis*. 2000 Feb;20(2):96-9.

2559. Ogundipe O, Hoyo C, Ostbye T, Oneko O, Manongi R, Lie RT, et al. Factors associated with prenatal folic acid and iron supplementation among 21,889 pregnant women in Northern Tanzania: a cross-sectional hospital-based study. *BMC public health*. 2012;12:481.

2560. Ogunleye DA, Lewin SN, Mutch DG, Liapis H, Herzog TJ. Hemolytic uremic syndrome presenting after treatment of endodermal sinus tumor. *Obstet Gynecol*. 2004 Nov;104(5 Pt 2):1184-7.

2561. Ogunyemi D, Benae JL, Ukatu C. Is eclampsia preventable? A case control review of consecutive cases from an urban underserved region. *South Med J*. 2004 May;97(5):440-5.

2562. Ogunyemi D, Ku W, Arkel Y. The association between inherited thrombophilia, antiphospholipid antibodies and lipoprotein A levels with obstetrical complications in pregnancy. *J Thromb Thrombolysis*. 2002 Oct;14(2):157-62.

2563. Ohkuchi A, Hirashima C, Matsubara S, Suzuki H, Takahashi K, Arai F, et al. Alterations in placental growth factor levels before and after the onset of preeclampsia are more pronounced in women with early onset severe preeclampsia. *Hypertension Research*. 2007 February;30(2):151-9.
2564. Ohkuchi A, Hirashima C, Takahashi K, Shirasuna K, Suzuki H, Ariga H, et al. A trio of risk factors for the onset of preeclampsia in the second and early third trimesters. *Pregnancy Hypertension*. 2014 July;4(3):224-30.
2565. Ohkuchi A, Iwasaki R, Suzuki H, Hirashima C, Takahashi K, Usui R, et al. Normal and high-normal blood pressures, but not body mass index, are risk factors for the subsequent occurrence of both preeclampsia and gestational hypertension: a retrospective cohort study. *Hypertension research : official journal of the Japanese Society of Hypertension*. 2006 Mar;29(3):161-7.
2566. Ohkuchi A, Iwasaki R, Suzuki H, Hirashima C, Takahashi K, Usui R, et al. Normal and high-normal blood pressure but not body mass index, are risk factors for the subsequent occurrence of both preeclampsia and gestational hypertension: A retrospective cohort study. *Hypertension Research*. 2006 March;29(3):161-7.
2567. Ojima T, Uehara R, Watanabe M, Tajimi M, Oki I, Nakamura Y. Population attributable fraction of smoking to low birth weight in Japan. *Pediatrics international : official journal of the Japan Pediatric Society*. 2004 Jun;46(3):264-7.
2568. Okafor UV, Efetie ER, Amucheazi A. Risk factors for maternal deaths in unplanned obstetric admissions to the intensive care unit-lessons for sub-Saharan Africa. *Afr J Reprod Health*. 2011 Dec;15(4):51-4.
2569. Okafor UV, Efetie ER, Igwe W, Okezie O. Anaesthetic management of patients with pre-eclampsia/eclampsia and perinatal outcome. *The journal of maternal-fetal & neonatal medicine : the official journal of the European Association of Perinatal Medicine, the Federation of Asia and Oceania Perinatal Societies, the International Society of Perinatal Obstet*. 2009 Aug;22(8):688-92.
2570. Okafor UV, Efetie ER, Igwe W, Okezie O. Anaesthetic management of patients with pre-eclampsia/eclampsia and perinatal outcome. *Journal of Maternal-Fetal and Neonatal Medicine*. 2009;22(8):688-92.
2571. Okafor UV, Efetie RE. Critical care management of eclamptics: challenges in an African setting. *Trop Doct*. 2008 Jan;38(1):11-3.
2572. Okafor UV, Ezegwui HU. Cesarean delivery in preeclampsia and seasonal variation in a tropical rainforest belt. *Journal of Postgraduate Medicine*. 2010 01 Jan;56(1):21-3.
2573. Okafor UV, Okezie O. Maternal and fetal outcome of anaesthesia for caesarean delivery in preeclampsia/eclampsia in Enugu, Nigeria: a retrospective observational study. *Int J Obstet Anesth*. 2005 Apr;14(2):108-13.
2574. Okasha M, McCarron P, Gunnell D, Davey Smith G. Exposures in childhood, adolescence and early adulthood and breast cancer risk: A systematic review of the literature. *Breast Cancer Research and Treatment*. 2003 March II;78(2):223-76.
2575. Okby R, Weintraub AY, Sergienko R, Eyal S. Gestational diabetes mellitus in twin pregnancies is not associated with adverse perinatal outcomes. *Arch Gynecol Obstet*. 2014 Oct;290(4):649-54.
2576. Oken E, Ning Y, Rifas-Shiman SL, Rich-Edwards JW, Olsen SF, Gillman MW. Diet during pregnancy and risk of preeclampsia or gestational hypertension. *Annals of epidemiology*. 2007 Sep;17(9):663-8.
2577. Okogbenin SA, Eigbefoh JO, Omorogbe F, Okogbo F, Okonta PI, Ohihoin AG. Eclampsia in Irrua Specialist Teaching Hospital: a five-year review. *Nigerian journal of clinical practice*. 2010 Jun;13(2):149-53.
2578. Okunola OO, Ayodele OE, Adekanle AD. Acute kidney injury requiring hemodialysis in the tropics. *Saudi J Kidney Dis Transpl*. 2012 Nov;23(6):1315-9.
2579. Oladapo OT, Lamina MA, Fakoya TA. Maternal deaths in Sagamu in the new millenium: A facility-based retrospective analysis. *BMC pregnancy and childbirth*. 2006 10 Mar;6(6).

2580. Oladokun A, Okewole AI, Adewole IF, Babarinsa IA. Evaluation of cases of eclampsia in the University College Hospital, Ibadan over a 10 year period. *West Afr J Med*. 2000 Jul-Sep;19(3):192-4.
2581. Oladokun A, Otegbayo JA, Adeniyi AA. Maternal and fetal outcomes of jaundice in pregnancy at the University College Hospital, Ibadan. *Nigerian journal of clinical practice*. 2009 Sep;12(3):277-80.
2582. Olafsdottir AS, Skuladottir GV, Thorsdottir I, Hauksson A, Thorgeirsdottir H, Steingrimsdottir L. Relationship between high consumption of marine fatty acids in early pregnancy and hypertensive disorders in pregnancy. *Bjog*. 2006 Mar;113(3):301-9.
2583. Olamijulo JA, Olaleye O. Perinatal mortality in Lagos University Teaching Hospital: a five year review. *Nig Q J Hosp Med*. 2011 Oct-Dec;21(4):255-61.
2584. Olatunji AO, Sule-Odu AO. Presentation and outcome of eclampsia at a Nigerian university hospital. *Nigerian journal of clinical practice*. 2007 Mar;10(1):1-4.
2585. Olayemi O, Strobino D, Aimakhu C, Adedapo K, Kehinde A, Odukogbe AT, et al. Influence of duration of sexual cohabitation on the risk of hypertension in nulliparous parturients in Ibadan: A cohort study. *The Australian & New Zealand journal of obstetrics & gynaecology*. 2010 Feb;50(1):40-4.
2586. Olivarez SA, Ferres M, Antony K, Mattewal A, Maheshwari B, Sangi-Haghpeykar H, et al. Obstructive sleep apnea screening in pregnancy, perinatal outcomes, and impact of maternal obesity. *Am J Perinatol*. 2011 Sep;28(8):651-8.
2587. Oliveira LC, Costa AA. Fetal and neonatal deaths among cases of maternal near miss. *Revista da Associacao Medica Brasileira (1992)*. 2013 Sep-Oct;59(5):487-94.
2588. Oliveira N, Doyle LE, Atlas RO, Jenkins CB, Blitzer MG, Baschat AA. External validity of first-trimester algorithms in the prediction of pre-eclampsia disease severity. *Ultrasound Obstet Gynecol*. 2014 Sep;44(3):286-92.
2589. Olopade FE, Lawoyin TO. Maternal mortality in a Nigerian Maternity Hospital. *African Journal Biomedical Research*. 2008;11(3):267-73.
2590. Olowonyo T, Oshin S, Obasanjo-Bello I. Registering in a health facility for delivery protects against maternal mortality in a developing country setting. *Journal of obstetrics and gynaecology : the journal of the Institute of Obstetrics and Gynaecology*. 2005 Oct;25(7):638-41.
2591. Olsen RN, Woelkers D, Dunsmoor-Su R, Lacoursiere DY. Abnormal second-trimester serum analytes are more predictive of preterm preeclampsia. *Am J Obstet Gynecol*. 2012 Sep;207(3):228.e1-7.
2592. Olsson D, Mogren I, Forsberg B. Air pollution exposure in early pregnancy and adverse pregnancy outcomes: A register-based cohort study. *BMJ Open*. 2013;3(2).
2593. Olupot-Olupot P, Urban BC, Jemutai J, Nteziyaremye J, Fanjo HM, Karanja H, et al. Endotoxaemia is common in children with *Plasmodium falciparum* malaria. *BMC infectious diseases*. 2013;13:117.
2594. Olusanya BO, Solanke OA. Perinatal outcomes associated with maternal hypertensive disorders of pregnancy in a developing country. *Hypertension in pregnancy*. 2012;31(1):120-30.
2595. O'Malley CM, Frumento RJ, Mets B, Naka Y, Bennett-Guerrero E. Endotoxaemia during left ventricular assist device insertion: relationship between risk factors and outcome. *Br J Anaesth*. 2004 Jan;92(1):131-3.
2596. Omoniyi-Esan O, Olaofe O, Onwubuya M, Fadahunsi O, Komolafe K. Pattern of deaths in females in a tertiary health center, south-west Nigeria. *International Journal of Women's Health*. 2011;3(1):307-12.
2597. Omu AE, Al-Harmi J, Vedi HL, Mlechkova L, Sayed AF, Al-Ragum NS. Magnesium sulphate therapy in women with pre-eclampsia and eclampsia in Kuwait. *Medical principles and practice : international journal of the Kuwait University, Health Science Centre*. 2008;17(3):227-32.
2598. Onah H. Prognostic value of absolute versus relative rise of blood pressure in pregnancy. *Afr J Reprod Health*. 2002 Apr;6(1):32-40.
2599. Onah HE, Iloabachie GC. Conservative management of early-onset pre-eclampsia and fetomaternal outcome in Nigerians. *Journal of obstetrics and gynaecology : the journal of the Institute of*

- Obstetrics and Gynaecology. 2002 Jul;22(4):357-62.
2600. Onah HE, Okaro JM, Umeh U, Chigbu CO. Maternal mortality in health institutions with emergency obstetric care facilities in Enugu State, Nigeria. *Journal of Obstetrics and Gynaecology*. 2005 August;25(6):569-74.
2601. Onakewhor JU, Gharoro EP. Changing trends in maternal mortality in a developing country. *Nigerian journal of clinical practice*. 2008 Jun;11(2):111-20.
2602. Onalan R, Onalan G, Gunenc Z, Karabulut E. Combining 2nd-trimester maternal serum homocysteine levels and uterine artery Doppler for prediction of preeclampsia and isolated intrauterine growth restriction. *Gynecol Obstet Invest*. 2006;61(3):142-8.
2603. Onisai M, Vladareanu AM, Delcea C, Ciorascu M, Bumbea H, Nicolescu A, et al. Perinatal outcome for pregnancies complicated with thrombocytopenia. *The journal of maternal-fetal & neonatal medicine : the official journal of the European Association of Perinatal Medicine, the Federation of Asia and Oceania Perinatal Societies, the International Society of Perinatal Obstet*. 2012 Sep;25(9):1622-6.
2604. Ono Y, Takagi K, Seki H, Takai Y, Samejima K, Matsunaga S, et al. Neonatal outcome in infants of chronically hypertensive mothers. *The journal of obstetrics and gynaecology research*. 2013 Jun;39(6):1142-6.
2605. Onuh SO, Aisien AO. Maternal and fetal outcome in eclamptic patients in Benin City, Nigeria. *Journal of obstetrics and gynaecology : the journal of the Institute of Obstetrics and Gynaecology*. 2004 Oct;24(7):765-8.
2606. Onwudiwe N, Yu CK, Poon LC, Spiliopoulos I, Nicolaidis KH. Prediction of pre-eclampsia by a combination of maternal history, uterine artery Doppler and mean arterial pressure. *Ultrasound Obstet Gynecol*. 2008 Dec;32(7):877-83.
2607. Onwuhafua PI, Oguntayo A. Perinatal mortality associated with eclampsia in Kaduna, Northern Nigeria. *Niger J Med*. 2006 Oct-Dec;15(4):397-400.
2608. Onwuhafua PI, Onwuhafua A, Adze J, Mairami Z. Eclampsia in Kaduna State of Nigeria--a proposal for a better outcome. *Niger J Med*. 2001 Apr-Jun;10(2):81-4.
2609. Onyiriuka AN. Analysis of stillbirths in a Nigerian mission hospital. *Nig Q J Hosp Med*. 2009 Jan-Mar;19(1):27-31.
2610. Opdahl S, Romundstad PR, Alsaker MD, Vatten LJ. Hypertensive diseases in pregnancy and breast cancer risk. *Br J Cancer*. 2012 Jun 26;107(1):176-82.
2611. Oppermann M, Fritzsche J, Weber-Schoendorfer C, Keller-Stanislawski B, Allignol A, Meister R, et al. A(H1N1)v2009: a controlled observational prospective cohort study on vaccine safety in pregnancy. *Vaccine*. 2012 Jun 22;30(30):4445-52.
2612. Orbach H, Matok I, Gorodischer R, Sheiner E, Daniel S, Wiznitzer A, et al. Hypertension and antihypertensive drugs in pregnancy and perinatal outcomes. *American Journal of Obstetrics and Gynecology*. 2013 April;208(4):301.e1-.e6.
2613. Orbach-Zinger S, Aviram A, Ioscovich A, Listengart M, Reuveni A, Fein S, et al. Anesthetic considerations in pregnant women at advanced maternal age. *Journal of Maternal-Fetal and Neonatal Medicine*. 2015 01 Jan;28(1):59-62.
2614. Ordi J, Ismail MR, Carrilho C, Romagosa C, Osman N, Machungo F, et al. Clinico-pathological discrepancies in the diagnosis of causes of maternal death in sub-Saharan Africa: retrospective analysis. *PLoS Med*. 2009 Feb 24;6(2):e1000036.
2615. Orfeo L, Casani A, Cocca F, Coletta C, De Luca MG, Di Manso G, et al. First year follow-up of extremely low birth weight premature sextuplets: case report. *The journal of maternal-fetal & neonatal medicine : the official journal of the European Association of Perinatal Medicine, the Federation of Asia and Oceania Perinatal Societies, the International Society of Perinatal Obstet*. 2011 Oct;24 Suppl 1:132-4.
2616. Orhan H, Onderoglu L, Yucel A, Sahin G. Circulating biomarkers of oxidative stress in complicated

- pregnancies. *Arch Gynecol Obstet*. 2003 Feb;267(4):189-95.
2617. Orji EO, Ogunlola IO, Onwudiegwu U. Brought-in maternal deaths in south-west Nigeria. *Journal of obstetrics and gynaecology : the journal of the Institute of Obstetrics and Gynaecology*. 2002 Jul;22(4):385-8.
2618. Ornaghi S, Tyurmorezova A, Algeri P, Giardini V, Ceruti P, Vertemati E, et al. Influencing factors for late-onset preeclampsia. *The journal of maternal-fetal & neonatal medicine : the official journal of the European Association of Perinatal Medicine, the Federation of Asia and Oceania Perinatal Societies, the International Society of Perinatal Obstet*. 2013 Sep;26(13):1299-302.
2619. Oron G, Ben-Haroush A, Goldfarb R, Molad Y, Hod M, Bar J. Contribution of the addition of anti-beta2-glycoprotein to the classification of antiphospholipid syndrome in predicting adverse pregnancy outcome. *The journal of maternal-fetal & neonatal medicine : the official journal of the European Association of Perinatal Medicine, the Federation of Asia and Oceania Perinatal Societies, the International Society of Perinatal Obstet*. 2011 Apr;24(4):606-9.
2620. Oron G, Sokal-Arnon T, Son WY, Demirtas E, Buckett W, Zeadna A, et al. Extended embryo culture is not associated with increased adverse obstetric or perinatal outcome. *Am J Obstet Gynecol*. 2014 Aug;211(2):165.e1-7.
2621. Oron G, Son WY, Buckett W, Tulandi T, Holzer H. The association between embryo quality and perinatal outcome of singletons born after single embryo transfers: a pilot study. *Human reproduction*. 2014 Jul;29(7):1444-51.
2622. Orozova-Bekkevold I, Jensen H, Stensballe L, Olsen J. Maternal vaccination and preterm birth: using data mining as a screening tool. *Pharmacy world & science : PWS*. 2007 Jun;29(3):205-12.
2623. O'Shea TM, Allred EN, Dammann O, Hirtz D, Kuban KCK, Paneth N, et al. The ELGAN study of the brain and related disorders in extremely low gestational age newborns. *Early Human Development*. 2009 November;85(11):719-25.
2624. Osmanagaoglu MA, Erdogan I, Zengin U, Bozkaya H. Comparison between HELLP syndrome, chronic hypertension, and superimposed preeclampsia on chronic hypertension without HELLP syndrome. *J Perinat Med*. 2004;32(6):481-5.
2625. Osmanagaoglu MA, Osmanagaoglu S, Ulusoy H, Bozkaya H. Maternal outcome in HELLP syndrome requiring intensive care management in a Turkish hospital. *Sao Paulo medical journal = Revista paulista de medicina*. 2006 Mar 2;124(2):85-9.
2626. Osmanagaoglu MA, Unal S, Bozkaya H. Chorioamnionitis risk and neonatal outcome in preterm premature rupture of membranes. *Arch Gynecol Obstet*. 2005 Jan;271(1):33-9.
2627. Osmundson SS, Lafayette RA, Bowen RA, Roque VC, Garabedian MJ, Aziz N. Maternal proteinuria in twin compared with singleton pregnancies. *Obstet Gynecol*. 2014 Aug;124(2 Pt 1):332-7.
2628. Ostensen M, Andreoli L, Brucato A, Cetin I, Chambers C, Clowse MEB, et al. State of the art: Reproduction and pregnancy in rheumatic diseases. *Autoimmunity Reviews*. 2015 01 May;14(5):376-86.
2629. Osterdal ML, Strom M, Klemmensen AK, Knudsen VK, Juhl M, Halldorsson TI, et al. Does leisure time physical activity in early pregnancy protect against pre-eclampsia? Prospective cohort in Danish women. *BJOG: An International Journal of Obstetrics and Gynaecology*. 2009 January;116(1):98-107.
2630. Ostlund E, Al-Nashi M, Hamad RR, Larsson A, Eriksson M, Bremme K, et al. Normalized endothelial function but sustained cardiovascular risk profile 11 years following a pregnancy complicated by preeclampsia. *Hypertension research : official journal of the Japanese Society of Hypertension*. 2013 Dec;36(12):1081-7.
2631. Ostlund I, Haglund B, Hanson U. Gestational diabetes and preeclampsia. *European journal of obstetrics, gynecology, and reproductive biology*. 2004 Mar 15;113(1):12-6.
2632. Ostrowski SR, Berg RM, Windelov NA, Meyer MA, Plovsing RR, Moller K, et al. Discrepant fibrinolytic response in plasma and whole blood during experimental endotoxemia in healthy volunteers. *PloS one*. 2013;8(3):e59368.



2633. Ota K, Dambaeva S, Han AR, Beaman K, Gilman-Sachs A, Kwak-Kim J. Vitamin D deficiency may be a risk factor for recurrent pregnancy losses by increasing cellular immunity and autoimmunity. *Human reproduction*. 2014 Feb;29(2):208-19.
2634. Ott J, Kurz C, Nouri K, Wirth S, Vytiska-Binstorfer E, Huber JC, et al. Pregnancy outcome in women with polycystic ovary syndrome comparing the effects of laparoscopic ovarian drilling and clomiphene citrate stimulation in women pre-treated with metformin: a retrospective study. *Reproductive biology and endocrinology : RB&E*. 2010;8:45.
2635. Ovalle A, Kakarieka E, Rencoret G, Fuentes A, del Rio MJ, Morong C, et al. Risk factors for preterm deliveries in a public hospital  
Factores asociados con el parto prematuro entre 22 y 34 semanas en un hospital publico de Santiago. *Revista Medica de Chile*. 2012 January;140(1):19-29.
2636. Ovesen P, Rasmussen S, Kesmodel U. Effect of prepregnancy maternal overweight and obesity on pregnancy outcome. *Obstetrics and Gynecology*. 2011 August;118(2 PART 1):305-12.
2637. Owe KM, Nystad W, Bo K. Association between regular exercise and excessive newborn birth weight. *Obstetrics and Gynecology*. 2009 October;114(4):770-6.
2638. Owolabi AT, Fatusi AO, Kuti O, Adeyemi A, Faturoti SO, Obiajuwa PO. Maternal complications and perinatal outcomes in booked and unbooked Nigerian mothers. *Singapore Medical Journal*. 2008 July;49(7):526-31.
2639. Oyati AI, Danbauchi SS, Isa MS, Alhassan MA, Sani BG, Anyiam CA, et al. Role of pre-eclamptic toxemia or eclampsia in hypertensive women attending cardiac clinic of Ahmadu Bello University Teaching Hospital Zaria, Nigeria. *Annals of African Medicine*. 2008;7(3):133-7.
2640. Oza-Frank R, Keim SA. Should obese women gain less weight in pregnancy than recommended? *Birth*. 2013 Jun;40(2):107-14.
2641. Ozekinci M, Mendilcioglu I, Inel M, Simsek M, Gulkesen KH. Abnormal one-hour 50-gram glucose challenge test and perinatal outcomes  
Anormal bir saatlik 50 gram glukoz yukleme testi ve perinatal sonuclar. *Turkiye Klinikleri Journal of Medical Sciences*. 2011;31(5):1211-7.
2642. Ozkan H, Cetinkaya M, Koksall N. Increased incidence of bronchopulmonary dysplasia in preterm infants exposed to preeclampsia. *Journal of Maternal-Fetal and Neonatal Medicine*. 2012 December;25(12):2681-5.
2643. Ozkan H, Cetinkaya M, Koksall N, Ozmen A, Yildiz M. Maternal preeclampsia is associated with an increased risk of retinopathy of prematurity. *Journal of Perinatal Medicine*. 2011 01 Sep;39(5):523-7.
2644. Ozkan S, Erel CT, Madazli R, Aydinli K. Serum leptin levels in hypertensive disorder of pregnancy. *European journal of obstetrics, gynecology, and reproductive biology*. 2005 Jun 1;120(2):158-63.
2645. Ozkaya E, Cakir E, Cinar M, Altay M, Gelisen O, Kara F. Second trimester serum alpha-fetoprotein level is a significant positive predictor for intrauterine growth restriction in pregnant women with hyperemesis gravidarum  
Ikinci Trimester Serum Alfa-Fetoprotein Duzeyi Hiperemesis Gravidarumu Olan Gebe Kadi{n}larda Intrauterin Gelisme Geriligi Icin Pozitif Bir Prediktordur. *Journal of the Turkish German Gynecology Association*. 2011;12(4):220-4.
2646. Ozkaya O, Sezik M, Sezik HT, Eyi EG. Leukocytosis might precede in-hospital eclampsia in preeclamptic women who do not receive magnesium sulfate. *J Perinat Med*. 2006;34(5):378-82.
2647. Ozlu T, Ozcan T. Fetal isolated short femur in the second trimester and adverse pregnancy outcomes. *Prenatal diagnosis*. 2013 Nov;33(11):1063-9.
2648. Ozturk E, Balat O, Acilmis YG, Ozcan C, Pence S, Erel O. Measurement of the placental total antioxidant status in preeclamptic women using a novel automated method. *The journal of obstetrics and gynaecology research*. 2011 Apr;37(4):337-42.
2649. Ozturk E, Balat O, Pehlivan S, Ugur MG, Ozcan C, Sever T, et al. Endothelial nitric oxide synthase

gene polymorphisms in preeclampsia with or without eclampsia in a Turkish population. *The journal of obstetrics and gynaecology research*. 2011 Dec;37(12):1778-83.

2650. Ozturk E, Balat O, Pehlivan S, Ugur MG, Sever T. Genetic variation of myeloperoxidase gene contributes to preeclampsia: a preliminary association study in Turkish population. *Hypertension in pregnancy*. 2011;30(4):377-83.

2651. Paauw JD, Bierling S, Cook CR, Davis AT. Hyperemesis gravidarum and fetal outcome. *Jpen*. 2005 2005;Journal of parenteral and enteral nutrition. 29(2):93-6.

2652. Paavonen EJ, Strang-Karlsson S, Raikonen K, Heinonen K, Pesonen AK, Hovi P, et al. Very low birth weight increases risk for sleep-disordered breathing in young adulthood: the Helsinki Study of Very Low Birth Weight Adults. *Pediatrics*. 2007 Oct;120(4):778-84.

2653. Pabinger I. Thrombophilia and its impact on pregnancy Adapted from Pabinger I, Thrombophilia and its impact on pregnancy, *Hamostaseologie* 2008;28(3):130-4. Published with permission from Schattauer GmbH. *Thrombosis Research*. 2009;123(SUPPL. 3):S16-S21.

2654. Pabinger I, Grafenhofer H, Kaider A, Ilic A, Eichinger S, Quehenberger P, et al. Preeclampsia and fetal loss in women with a history of venous thromboembolism. *Arterioscler Thromb Vasc Biol*. 2001 May;21(5):874-9.

2655. Pabinger I, Vormittag R. Thrombophilia and pregnancy outcomes. *Journal of thrombosis and haemostasis : JTH*. 2005 Aug;3(8):1603-10.

2656. Padhy N, Gupta S, Mahla A, Latha M, Varma T. Demographic characteristics and clinical profile of poor responders in IVF / ICSI: A comparative study. *Journal of Human Reproductive Sciences*. 2010 01 Jul;3(2):91-4.

2657. Pagani G, D'Antonio F, Khalil A, Akolekar R, Papageorgiou A, Bhide A, et al. Association between reduced fetal movements at term and abnormal uterine artery Doppler indices. *Ultrasound Obstet Gynecol*. 2014 May;43(5):548-52.

2658. Pahwa N, Bharani R, Kumar R. Post-partum acute kidney injury. *Saudi J Kidney Dis Transpl*. 2014 Nov;25(6):1244-7.

2659. Paidas MJ, Sibai BM, Triche EW, Frieling J, Lowry S. Exploring the role of antithrombin replacement for the treatment of preeclampsia: a prospective randomized evaluation of the safety and efficacy of recombinant antithrombin in very preterm preeclampsia (PRESERVE-1). *American journal of reproductive immunology (New York, NY : 1989)*. 2013 Jun;69(6):539-44.

2660. Paine MA, Rodeck CH, Williams PJ, Rademacher TW. Possible involvement of inositol phosphoglycan-P in human parturition. *J Reprod Immunol*. 2003 Aug;59(2):267-75.

2661. Paine MA, Scioscia M, Williams PJ, Gumaa K, Rodeck CH, Rademacher TW. Urinary inositol phosphoglycan P-type as a marker for prediction of preeclampsia and novel implications for the pathophysiology of this disorder. *Hypertension in pregnancy*. 2010;29(4):375-84.

2662. Pak KJ, Hu T, Fee C, Wang R, Smith M, Bazzano LA. Acute hypertension: A systematic review and appraisal of guidelines. *Ochsner Journal*. 2014 01 Dec;14(4):655-63.

2663. Pallasmaa N, Ekblad U, Aitokallio-Tallberg A, Uotila J, Raudaskoski T, Ulander VM, et al. Cesarean delivery in Finland: maternal complications and obstetric risk factors. *Acta Obstet Gynecol Scand*. 2010 Jul;89(7):896-902.

2664. Pallasmaa N, Ekblad U, Gissler M, Alanen A. The impact of maternal obesity, age, pre-eclampsia and insulin dependent diabetes on severe maternal morbidity by mode of delivery-a register-based cohort study. *Arch Gynecol Obstet*. 2015 Feb;291(2):311-8.

2665. Palmer JR, Hatch EE, Rosenberg CL, Hartge P, Kaufman RH, Titus-Ernstoff L, et al. Risk of breast cancer in women exposed to diethylstilbestrol in utero: preliminary results (United States). *Cancer causes & control : CCC*. 2002 Oct;13(8):753-8.

2666. Palmer JR, Hatch EE, Rosenberg CL, Hartge P, Kaufman RH, Titus-Ernstoff L, et al. Risk of breast cancer in women exposed to diethylstilbestrol in utero: Preliminary results (United States). *Cancer*

Causes and Control. 2002 October;13(8):753-8.

2667. Palmer L, Newby BD. Development of a simplified protocol for administration of 20% magnesium sulphate for prophylaxis and treatment of eclampsia. *Canadian Journal of Hospital Pharmacy*. 2009 November-December;62(6):490-5.

2668. Palmsten K, Hernandez-Diaz S, Kuriya B, Solomon DH, Setoguchi S. Use of disease-modifying antirheumatic drugs during pregnancy and risk of preeclampsia. *Arthritis care & research*. 2012 Nov;64(11):1730-8.

2669. Palmsten K, Huybrechts KF, Michels KB, Williams PL, Mogun H, Setoguchi S, et al. Antidepressant use and risk for preeclampsia. *Epidemiology (Cambridge, Mass)*. 2013 September;24(5):682-91.

2670. Palmsten K, Setoguchi S, Margulis AV, Patrick AR, Hernandez-Diaz S. Elevated risk of preeclampsia in pregnant women with depression: depression or antidepressants? *American journal of epidemiology*. 2012 May 15;175(10):988-97.

2671. Paltiel O, Friedlander Y, Tiram E, Barchana M, Xue X, Harlap S. Cancer after pre-eclampsia: Follow up of the Jerusalem perinatal study cohort. *British Medical Journal*. 2004 17 Apr;328(7445):919-21.

2672. Pamidi S, Pinto LM, Marc I, Benedetti A, Schwartzman K, Kimoff RJ. Maternal sleep-disordered breathing and adverse pregnancy outcomes: A systematic review and metaanalysis. *American Journal of Obstetrics and Gynecology*. 2014 January;210(1):52.e1-.e14.

2673. Panagopoulos P, Tsoukalos G, Economou A, Zikopoulos M, Koutras I, Petrakos G, et al. Delivery and immigration: the experience of a Greek Hospital. *Clinical and experimental obstetrics & gynecology*. 2005;32(1):55-7.

2674. Panchabhai T, Patil P, Shah D, Joshi A. An autopsy study of maternal mortality: A tertiary healthcare perspective. *Journal of Postgraduate Medicine*. 2009 01 Jan;55(1):8-11.

2675. Panchal S, Arria AM, Labhsetwar SA. Maternal mortality during hospital admission for delivery: a retrospective analysis using a state-maintained database. *Anesth Analg*. 2001 Jul;93(1):134-41.

2676. Pande AR, Ando K, Ishikura R, Nagami Y, Takada Y, Wada A, et al. Clinicoradiological factors influencing the reversibility of posterior reversible encephalopathy syndrome: a multicenter study. *Radiation medicine*. 2006 Dec;24(10):659-68.

2677. Pandure MM, Ghosh DK. Morphology of preterm placenta and its clinicopathological correlation. *Pravara Medical Review*. 2011 June;6(2):4-10.

2678. Panesar NS, Chan KW, Li CY, Rogers MS. Status of anti-thyroid peroxidase during normal pregnancy and in patients with hyperemesis gravidarum. *Thyroid*. 2006 May;16(5):481-4.

2679. Panesar NS, Li CY, Rogers MS. Are thyroid hormones or hCG responsible for hyperemesis gravidarum? A matched paired study in pregnant Chinese women. *Acta Obstetrica et Gynecologica Scandinavica*. 2001;80(6):519-24.

2680. Paneva-Masin J, Zafirovska K, Bogdanovska S, Lozance L, Gerasimovska B. Changes of plasma fibronectin levels in pregnancy induced hypertension. *Acta Med Croatica*. 2000;54(4-5):157-60.

2681. Pang WW, Tsui MH, Sahota D, Leung TY, Lau TK, Lo YM, et al. A strategy for identifying circulating placental RNA markers for fetal growth assessment. *Prenatal diagnosis*. 2009 May;29(5):495-504.

2682. Papadopoulou E, Sifakis S, Giahnakis E, Fragouli Y, Karkavitsas N, Koumantakis E, et al. Increased human placental growth hormone at midtrimester pregnancies may be an index of intrauterine growth retardation related to preeclampsia. *Growth hormone & IGF research : official journal of the Growth Hormone Research Society and the International IGF Research Society*. 2006 Oct-Dec;16(5-6):290-6.

2683. Papageorghiou AT, Fratelli N, Leslie K, Bhide A, Thilaganathan B. Outcome of fetuses with antenatally diagnosed short femur. *Ultrasound Obstet Gynecol*. 2008 May;31(5):507-11.

2684. Papageorghiou AT, Yu CK, Erasmus IE, Cuckle HS, Nicolaides KH. Assessment of risk for the development of pre-eclampsia by maternal characteristics and uterine artery Doppler. *Bjog*. 2005

Jun;112(6):703-9.

2685. Papantoniou N, Bagiokos V, Agiannitopoulos K, Kolialexi A, Destouni A, Tounta G, et al. RASSF1A in maternal plasma as a molecular marker of preeclampsia. *Prenatal diagnosis*. 2013 Jul;33(7):682-7.
2686. Pappa KI, Roubelakis M, Vlachos G, Marinopoulos S, Zissou A, Anagnou NP, et al. Variable effects of maternal and paternal-fetal contribution to the risk for preeclampsia combining GSTP1, eNOS, and LPL gene polymorphisms. *The journal of maternal-fetal & neonatal medicine : the official journal of the European Association of Perinatal Medicine, the Federation of Asia and Oceania Perinatal Societies, the International Society of Perinatal Obstet*. 2011 Apr;24(4):628-35.
2687. Pare E, Parry S, McElrath TF, Pucci D, Newton A, Lim KH. Clinical risk factors for preeclampsia in the 21st century. *Obstet Gynecol*. 2014 Oct;124(4):763-70.
2688. Pariente G, Shwarzman P, Aricha-Tamir B, Weintraub AY, Hershkovitz R. Association between first trimester vaginal bleeding and uterine artery Doppler measured at second and third trimesters of pregnancy. *Journal of Maternal-Fetal and Neonatal Medicine*. 2013 November;26(17):1724-7.
2689. Park FJ, Leung CH, Poon LC, Williams PF, Rothwell SJ, Hyett JA. Clinical evaluation of a first trimester algorithm predicting the risk of hypertensive disease of pregnancy. *The Australian & New Zealand journal of obstetrics & gynaecology*. 2013 Dec;53(6):532-9.
2690. Park HJ, Kim SH, Jung YW, Shim SS, Kim JY, Cho YK, et al. Screening models using multiple markers for early detection of late-onset preeclampsia in low-risk pregnancy. *BMC pregnancy and childbirth*. 2014;14:35.
2691. Park JH, Lee BE, Park HS, Ha EH, Lee SW, Kim YJ. Association between pre-pregnancy body mass index and socioeconomic status and impact on pregnancy outcomes in Korea. *The journal of obstetrics and gynaecology research*. 2011 Feb;37(2):138-45.
2692. Park KH, Cho YK, Lee CM, Choi H, Kim BR, Lee HK. Effect of preeclampsia, magnesium sulfate prophylaxis, and maternal weight on labor induction: a retrospective analysis. *Gynecol Obstet Invest*. 2006;61(1):40-4.
2693. Park SJ, Choi NK, Seo KH, Park KH, Woo SJ. Retinal vein occlusion and pregnancy, pre-eclampsia, and eclampsia: The results from a nationwide, population-based study using the national claim database. *PloS one*. 2015 16 Mar;10(3).
2694. Parker CR, Jr., Hauth JC, Goldenberg RL, Copper RL, Dubard MB. Umbilical cord serum levels of thromboxane B2 in term infants of women who participated in a placebo-controlled trial of low-dose aspirin. *Journal of Maternal-Fetal Medicine*. 2000;9(4):209-15.
2695. Parker MG, Ouyang F, Pearson C, Gillman MW, Belfort MB, Hong X, et al. Prepregnancy body mass index and risk of preterm birth: Association heterogeneity by preterm subgroups. *BMC pregnancy and childbirth*. 2014 30 Apr;14(1).
2696. Parlakgumus HA, Iskender C, Aytac PC, Tarim E. Do intrauterine growth restricted fetuses of the hypertensive and normotensive mothers differ from each other? *Arch Gynecol Obstet*. 2012 Nov;286(5):1147-51.
2697. Parnas M, Sheiner E, Shoham-Vardi I, Burstein E, Yermiahu T, Levi I, et al. Moderate to severe thrombocytopenia during pregnancy. *European journal of obstetrics, gynecology, and reproductive biology*. 2006 Sep-Oct;128(1-2):163-8.
2698. Parra-Cordero M, Sepulveda-Martinez A, Preisler J, Pasten J, Soto-Chacon E, Valdes E, et al. Role of the glucose tolerance test as a predictor of preeclampsia. *Gynecol Obstet Invest*. 2014;78(2):130-5.
2699. Parra-Cordero M, Turan OM, Kaur A, Pearson JD, Nicolaides KH. Maternal serum soluble adhesion molecule levels at 11+0-13+6 weeks and subsequent development of pre-eclampsia. *Journal of Maternal-Fetal and Neonatal Medicine*. 2007;20(11):793-6.
2700. Parretti E, Mealli F, Magrini A, Cioni R, Mecacci F, La Torre P, et al. Cross-sectional and longitudinal evaluation of uterine artery Doppler velocimetry for the prediction of pre-eclampsia in normotensive women with specific risk factors. *Ultrasound in Obstetrics and Gynecology*. 2003 01

Aug;22(2):160-5.

2701. Parrish M, Griffin M, Morris R, Darby M, Owens MY, Martin JN, Jr. Hyperuricemia facilitates the prediction of maternal and perinatal adverse outcome in patients with severe/superimposed preeclampsia. *The journal of maternal-fetal & neonatal medicine : the official journal of the European Association of Perinatal Medicine, the Federation of Asia and Oceania Perinatal Societies, the International Society of Perinatal Obstet.* 2010 Dec;23(12):1451-5.
2702. Parrish MR, Martin JN, Lamarca BB, Ellis B, Parrish SA, Owens MY, et al. Randomized, placebo controlled, double blind trial evaluating early pregnancy phytonutrient supplementation in the prevention of preeclampsia. *Journal of Perinatology.* 2013 August;33(8):593-9.
2703. Parsons CS, Orsini JA, Krafty R, Capewell L, Boston R. Risk factors for development of acute laminitis in horses during hospitalization: 73 cases (1997-2004). *Journal of the American Veterinary Medical Association.* 2007 Mar 15;230(6):885-9.
2704. Pascal J, Perbet S, Bourdel N, Da Ines D, Tran X, Chartier C, et al. Management of HSV-1 encephalitis due to reactivation of HSV-1 during late pregnancy. *Int J Obstet Anesth.* 2012 Oct;21(4):364-7.
2705. Pass RF, Zhang CH, Evans A, Simpson T, Andrews W, Huang ML, et al. Vaccine prevention of maternal cytomegalovirus infection. *New England Journal of Medicine.* 2009 19 Mar;360(12):1191-9.
2706. Passamonti F, Randi ML, Rumi E, Pungolino E, Elena C, Pietra D, et al. Increased risk of pregnancy complications in patients with essential thrombocythemia carrying the JAK2 (617V>F) mutation. *Blood.* 2007 Jul 15;110(2):485-9.
2707. Pastor Rojo O, Lopez San Roman A, Albeniz Arbizu E, de la Hera Martinez A, Ripoll Sevillano E, Albillos Martinez A. Serum lipopolysaccharide-binding protein in endotoxemic patients with inflammatory bowel disease. *Inflamm Bowel Dis.* 2007 Mar;13(3):269-77.
2708. Pasupathy D, Dacey A, Cook E, Charnock-Jones DS, White IR, Smith GC. Study protocol. A prospective cohort study of unselected primiparous women: the pregnancy outcome prediction study. *BMC pregnancy and childbirth.* 2008;8:51.
2709. Pasupathy D, McCowan LME, Poston L, Kenny LC, Dekker GA, North RA. Perinatal outcomes in large infants using customised birthweight centiles and conventional measures of high birthweight. *Paediatric and perinatal epidemiology.* 2012 November;26(6):543-52.
2710. Pasztor N, Kereszturi A, Kozinszky Z, Pal A. Identification of causes of stillbirth through autopsy and placental examination reports. *Fetal and pediatric pathology.* 2014 February;33(1):49-54.
2711. Patel SV, Parish DC, Patel RM, Grimsley EW. Resolution of MRI findings in central pontine myelinosis associated with hypokalemia. *American Journal of the Medical Sciences.* 2007 December;334(6):490-2.
2712. Paternoster DM, Stella A, Simioni P, Girolami A, Snijders D. Activated protein C resistance in normal and pre-eclamptic pregnancies. *Gynecol Obstet Invest.* 2002;54(3):145-9.
2713. Pathak D, Chakraborty B, Goswami S, Adhikari S. Changing trends of maternal mortality: A comparative study. *Journal of Obstetrics and Gynecology of India.* 2011 April;61(2):161-5.
2714. Pathak S, Lees CC, Hackett G, Jessop F, Sebire NJ. Frequency and clinical significance of placental histological lesions in an unselected population at or near term. *Virchows Archiv : an international journal of pathology.* 2011 Dec;459(6):565-72.
2715. Patil MM. Role of neuroimaging in patients with atypical eclampsia. *Journal of Obstetrics and Gynecology of India.* 2012 October;62(5):526-30.
2716. Patil S, Bhosale R, Sambarey P, Gupte N, Suryavanshi N, Sastry J, et al. Impact of maternal human immunodeficiency virus infection on pregnancy and birth outcomes in Pune, India. *AIDS care.* 2011 Dec;23(12):1562-9.
2717. Patnaik MM, Deshpande AK, Nagar VS, Algotar KM. Thrombotic microangiopathies presenting as an obstetric emergency. *J Assoc Physicians India.* 2004 Feb;52:152-3.

2718. Patrick TE, Hubel CA, Roberts JM. Evidence of Increased Oxidative Stress, Unexplained by Lipid Changes, Is Present in Nulliparous Black Women from Early Gestation. *Hypertension in pregnancy*. 2004;23(1):91-100.
2719. Paul BS, Juneja SK, Paul G, Gupta S. Spectrum of neurological complications in HELLP syndrome. *Neurology India*. 2013 Sep-Oct;61(5):467-71.
2720. Paul DA, Mackley A, Locke RG, Ehrenthal D, Hoffman M, Kroelinger C. Increased preeclampsia in mothers delivering very low-birth-weight infants between 1994 and 2006. *Am J Perinatol*. 2009 Jun;26(6):467-72.
2721. Paul DA, Zook K, MacKley A, Locke RG. Reduced mortality and increased BPD with histological chorioamnionitis and leukocytosis in very-low-birth-weight infants. *Journal of Perinatology*. 2010 January;30(1):58-62.
2722. Paulson RJ, Boostanfar R, Saadat P, Mor E, Tourgeman DE, Slater CC, et al. Pregnancy in the sixth decade of life: obstetric outcomes in women of advanced reproductive age. *Jama*. 2002 Nov 13;288(18):2320-3.
2723. Pavicic-Astalos J, Vatauvuk Z, Bencic G, Andrijevic-Derk B, Kuna K. Sudden bilateral choroidal detachment in a patient with posterior reversible encephalopathy syndrome. *Macedonian Journal of Medical Sciences*. 2014 15 Sep;7(3):488-90.
2724. Pawelec M, Palczynski B, Karmowski A. HELLP syndrome in pregnancies below 26th week. *The journal of maternal-fetal & neonatal medicine : the official journal of the European Association of Perinatal Medicine, the Federation of Asia and Oceania Perinatal Societies, the International Society of Perinatal Obstet*. 2012 May;25(5):467-70.
2725. Payne B, Hodgson S, Hutcheon JA, Joseph KS, Li J, Lee T, et al. Performance of the fullPIERS model in predicting adverse maternal outcomes in pre-eclampsia using patient data from the PIERS (Pre-eclampsia Integrated Estimate of RiSk) cohort, collected on admission. *BJOG: An International Journal of Obstetrics and Gynaecology*. 2013 January;120(1):113-8.
2726. Payne B, Magee LA, Cote AM, Hutcheon JA, Li J, Kyle PM, et al. PIERS proteinuria: relationship with adverse maternal and perinatal outcome. *Journal of obstetrics and gynaecology Canada : JOGC = Journal d'obstetrique et gynecologie du Canada : JOGC*. 2011 Jun;33(6):588-97.
2727. Payne BA, Hutcheon JA, Ansermino JM, Hall DR, Bhutta ZA, Bhutta SZ, et al. A risk prediction model for the assessment and triage of women with hypertensive disorders of pregnancy in low-resourced settings: the miniPIERS (Pre-eclampsia Integrated Estimate of RiSk) multi-country prospective cohort study. *PLoS Med*. 2014 Jan;11(1):e1001589.
2728. Payne BA, Hutcheon JA, Dunsmuir D, Cloete G, Dumont G, Hall D, et al. Assessing the incremental value of blood oxygen saturation (SpO<sub>2</sub>) in the miniPIERS (Pre-eclampsia Integrated Estimate of RiSk) Risk Prediction Model. *Journal of obstetrics and gynaecology Canada : JOGC = Journal d'obstetrique et gynecologie du Canada : JOGC*. 2015 Jan;37(1):16-24.
2729. Payne BA, Kyle PM, Lim K, Lisonkova S, Magee LA, Pullar B, et al. An assessment of predictive value of the biophysical profile in women with preeclampsia using data from the fullPIERS database. *Pregnancy Hypertension*. 2013 July;3(3):166-71.
2730. Payne NR, Pflieger KM, Blauer C, Finkelstein M, Olsen S. The inverse association between gastroschisis and gestational hypertension. *Journal of Neonatal-Perinatal Medicine*. 2011;4(3):211-20.
2731. Pearson GA, Mackenzie IZ. Blood loss and blood transfusion at caesarean section: A prospective observational study covering 30 years. *European Journal of Obstetrics Gynecology and Reproductive Biology*. 2014 01 Oct;181:72-7.
2732. Peccatori FA, Azim Jr HA, Scarfone G, Gadducci A, Bonazzi C, Gentilini O, et al. Weekly epirubicin in the treatment of gestational breast cancer (GBC). *Breast Cancer Research and Treatment*. 2009 June;115(3):591-4.
2733. Pecks U, Maass N, Neulen J. Oocyte donation: A risk factor for pregnancy-induced hypertension -

A meta-analysis and case series. [German, English]

Eizellspende - Ein risikofaktor für schwangerschaftshochdruck metaanalyse und fallserie. Deutsches Arzteblatt. 2011 21 Jan;108(3):23-31+10.

2734. Pecks U, Rath W, Caspers R, Sosnowsky K, Ziems B, Thiesen HJ, et al. Oxidatively modified LDL particles in the human placenta in early and late onset intrauterine growth restriction. *Placenta*. 2013 Dec;34(12):1142-9.

2735. Pecori C, Giannini M, Portaccio E, Ghezzi A, Hakiki B, Pasto L, et al. Paternal therapy with disease modifying drugs in multiple sclerosis and pregnancy outcomes: A prospective observational multicentric study. *BMC Neurology*. 2014 20 May;14(1).

2736. Pedersen LM, Pedersen TA, Ravn HB, Hjortdal VE. Outcomes of pregnancy in women with tetralogy of Fallot. *Cardiol Young*. 2008 Aug;18(4):423-9.

2737. Pedersen NG, Sperling L, Wojdemann KR, Larsen SO, Tabor A. First trimester growth restriction and uterine artery blood flow in the second trimester as predictors of adverse pregnancy outcome. *European Journal of Obstetrics Gynecology and Reproductive Biology*. 2013 May;168(1):20-5.

2738. Pedersen NG, Wojdemann KR, Scheike T, Tabor A. Fetal growth between the first and second trimesters and the risk of adverse pregnancy outcome. *Ultrasound Obstet Gynecol*. 2008 Aug;32(2):147-54.

2739. Peitsidou A, Peitsidis P, Contis J. Spontaneous hepatic rupture during third trimester of pregnancy. *Acta chirurgica Belgica*. 2008 Jul-Aug;108(4):464-7.

2740. Peled Y, Melamed N, Hirsch L, Hadar E, Wiznitzer A, Yogev Y. Pregnancy outcome in hyperemesis gravidarum - the role of fetal gender. *Journal of Maternal-Fetal and Neonatal Medicine*. 2013 November;26(17):1753-7.

2741. Peled Y, Melamed N, Hirsch L, Pardo J, Wiznitzer A, Yogev Y. The impact of total parenteral nutrition support on pregnancy outcome in women with hyperemesis gravidarum. *Journal of Maternal-Fetal and Neonatal Medicine*. 2014 July;27(11):1146-50.

2742. Peled Y, Melamed N, Krissi H, Eitan R, Yogev Y, Pardo J. The impact of severe hyperemesis gravidarum on the triple test screening results. *Journal of Maternal-Fetal and Neonatal Medicine*. 2012 June;25(6):637-8.

2743. Pell JP, Smith GCS, Walsh D. Pregnancy Complications and Subsequent Maternal Cerebrovascular Events: A Retrospective Cohort Study of 119,668 Births. *American journal of epidemiology*. 2004 15 Feb;159(4):336-42.

2744. Peltier MR, Ananth CV. Is the association of maternal smoking and pregnancy-induced hypertension dependent on fetal growth? *American Journal of Obstetrics and Gynecology*. 2007 June;196(6):532.e1-.e6.

2745. Pembe AB, Paulo C, D'Mello B S, van Roosmalen J. Maternal mortality at muhimbili national hospital in Dar-es-Salaam, Tanzania in the year 2011. *BMC pregnancy and childbirth*. 2014 September 13;14(1).

2746. Penfield CA, Cheng YW, Caughey AB. Obstetric outcomes in adolescent pregnancies: a racial/ethnic comparison. *The journal of maternal-fetal & neonatal medicine : the official journal of the European Association of Perinatal Medicine, the Federation of Asia and Oceania Perinatal Societies, the International Society of Perinatal Obstet*. 2013 Sep;26(14):1430-4.

2747. Penning ME, Bloemenkamp KW, Van Zon TD, Zandbergen M, Schutte JM, Bruijn JA, et al. Association of preeclampsia with podocyte turnover. *Clinical Journal of the American Society of Nephrology*. 2014;9(8):1377-85.

2748. Pennison EH, Egerman RS. Perinatal outcomes in gestational diabetes: A comparison of criteria for diagnosis. *American Journal of Obstetrics and Gynecology*. 2001 May;184(6):1118-21.

2749. Pereira G, Hagggar F, Shand AW, Bower C, Cook A, Nassar N. Association between pre-eclampsia and locally derived traffic-related air pollution: a retrospective cohort study. *Journal of epidemiology*

and community health. 2013 Feb;67(2):147-52.

2750. Pereira PR, Pinho J, Rodrigues M, Rocha J, Sousa F, Amorim J, et al. Clinical, imagiological and etiological spectrum of posterior reversible encephalopathy syndrome. *Arquivos de neuro-psiquiatria*. 2015 Jan;73(1):36-40.

2751. Perez-Sepulveda A, Torres MJ, Valenzuela FJ, Larrain R, Figueroa-Diesel H, Galaz J, et al. Low 2-methoxyestradiol levels at the first trimester of pregnancy are associated with the development of pre-eclampsia. *Prenatal diagnosis*. 2012 Nov;32(11):1053-8.

2752. Perrin MC, Terry MB, Kleinhaus K, Deutsch L, Yanetz R, Tiram E, et al. Gestational diabetes as a risk factor for pancreatic cancer: a prospective cohort study. *BMC Med*. 2007;5:25.

2753. Persson M, Pasupathy D, Hanson U, Westgren M, Norman M. Pre-pregnancy body mass index and the risk of adverse outcome in type 1 diabetic pregnancies: A population-based cohort study. *BMJ Open*. 2012;2(1).

2754. Pervulov M, Gojnic M, Jovanovic D. Cerebrovascular diseases during pregnancy and puerperium. *The journal of maternal-fetal & neonatal medicine : the official journal of the European Association of Perinatal Medicine, the Federation of Asia and Oceania Perinatal Societies, the International Society of Perinatal Obstet*. 2009 Jan;22(1):51-8.

2755. Pesce G, Marcon A, Marchetti P, Girardi P, de Marco R. Febrile and gynecological infections during pregnancy are associated with a greater risk of childhood eczema. *Pediatr Allergy Immunol*. 2014 Mar;25(2):159-65.

2756. Pesonen AK, Raikonen K, Heinonen K, Andersson S, Hovi P, Jarvenpaa AL, et al. Personality of young adults born prematurely: The Helsinki study of very low birth weight adults. *Journal of Child Psychology and Psychiatry and Allied Disciplines*. 2008 June;49(6):609-17.

2757. Peter P, George A. Posterior reversible encephalopathy syndrome and the pediatric population. *Journal of Pediatric Neurosciences*. 2012 May-August;7(2):136-8.

2758. Peter Stein T, Scholl TO, Schluter MD, Leskiw MJ, Chen X, Spur BW, et al. Oxidative stress early in pregnancy and pregnancy outcome. *Free radical research*. 2008 Oct;42(10):841-8.

2759. Peters CJ, Kayemba-Kays S, Geary MP, Hindmarsh PC. Blood glucose in multiparous women influences offspring birth size but not size at 2 years of age. *The Journal of clinical endocrinology and metabolism*. 2013 Dec;98(12):4916-22.

2760. Petersen KM, Jimenez-Solem E, Andersen JT, Petersen M, Brodback K, Kober L, et al. beta-Blocker treatment during pregnancy and adverse pregnancy outcomes: A nationwide population-based cohort study. *BMJ Open*. 2012;2(4).

2761. Peterson E, Craig S, House M. Risk factors for postpartum antihypertensive medication requirement in severe preeclampsia. *Hypertension in pregnancy*. 2010;29(3):350-6.

2762. Peticca P, Keely EJ, Walker MC, Yang Q, Bottomley J. Pregnancy outcomes in diabetes subtypes: how do they compare? A province-based study of Ontario, 2005-2006. *Journal of obstetrics and gynaecology Canada : JOGC = Journal d'obstetrique et gynecologie du Canada : JOGC*. 2009 Jun;31(6):487-96.

2763. Phadungkiatwattana P, Rujivejpongsathron J, Tunsatit T, Yanase Y. Analyzing pregnancy outcomes in women of extremely advanced maternal age (> or = 45 years). *Journal of the Medical Association of Thailand = Chotmaihet thangphaet*. 2014 Jan;97(1):1-6.

2764. Phadungkiatwattana P, Rujivejpongsathron J, Tunsatit T, Yanase Y. Analyzing pregnancy outcomes in women of extremely advanced maternal age (>45 years). *Journal of the Medical Association of Thailand*. 2014 January;97(1):1-6.

2765. Phadungkiatwattana P, Sirivatanapa P, Tongsong T. Outcomes of pregnancies complicated by systemic lupus erythematosus (SLE). *Journal of the Medical Association of Thailand = Chotmaihet thangphaet*. 2007 Oct;90(10):1981-5.

2766. Phaloprakarn C, Tangjitgamol S. Impact of high maternal hemoglobin at first antenatal visit on



pregnancy outcomes: a cohort study. *J Perinat Med*. 2008;36(2):115-9.

2767. Phaloprakarn C, Tangjitgamol S. Maternal ABO blood group and adverse pregnancy outcomes. *Journal of perinatology : official journal of the California Perinatal Association*. 2013 Feb;33(2):107-11.

2768. Phelan LK, Brown MA, Davis GK, Mangos G. A prospective study of the impact of automated dipstick urinalysis on the diagnosis of preeclampsia. *Hypertension in pregnancy*. 2004;23(2):135-42.

2769. Phithakwatchara N, Titapant V. The effect of pre-pregnancy weight on delivery outcome and birth weight in potential diabetic patients with normal screening for gestational diabetes mellitus in Siriraj Hospital. *Journal of the Medical Association of Thailand = Chotmai het thangphaet*. 2007 Feb;90(2):229-36.

2770. Phupong V, Dejthevaporn T. Predicting risks of preeclampsia and small for gestational age infant by uterine artery Doppler. *Hypertension in pregnancy*. 2008;27(4):387-95.

2771. Phupong V, Suebnukarn K. Obstetric outcomes in nulliparous young adolescents. *The Southeast Asian journal of tropical medicine and public health*. 2007 Jan;38(1):141-5.

2772. Piccoli GB, Attini R, Parisi S, Vigotti FN, Daidola G, Deagostini MC, et al. Excessive urinary tract dilatation and proteinuria in pregnancy: A common and overlooked association? *BMC Nephrology*. 2013;14(1).

2773. Picklesimer AH, Jared HL, Moss K, Offenbacher S, Beck JD, Boggess KA. Racial differences in C-reactive protein levels during normal pregnancy. *Am J Obstet Gynecol*. 2008 Nov;199(5):523.e1-6.

2774. Pien GW, Fife D, Pack AI, Nkwuo JE, Schwab RJ. Changes in symptoms of sleep-disordered breathing during pregnancy. *Sleep*. 2005 Oct;28(10):1299-305.

2775. Pien GW, Pack AI, Jackson N, Maislin G, Macones GA, Schwab RJ. Risk factors for sleep-disordered breathing in pregnancy. *Thorax*. 2014 Apr;69(4):371-7.

2776. Pilalis A, Souka AP, Antsaklis P, Basayiannis K, Benardis P, Haidopoulos D, et al. Screening for pre-eclampsia and small for gestational age fetuses at the 11-14 weeks scan by uterine artery Dopplers. *Acta Obstet Gynecol Scand*. 2007;86(5):530-4.

2777. Pilo C, Wide K, Winbladh B. Pregnancy, delivery, and neonatal complications after treatment with antiepileptic drugs. *Acta Obstet Gynecol Scand*. 2006;85(6):643-6.

2778. Pina IL. Cardiovascular disease in women: Challenge of the middle years. *Cardiology in Review*. 2011 March-April;19(2):71-5.

2779. Pinborg A, Lidegaard O, Freiesleben N, Andersen AN. Vanishing twins: a predictor of small-for-gestational age in IVF singletons. *Human reproduction*. 2007 Oct;22(10):2707-14.

2780. Pinborg A, Loft A, Schmidt L, Langhoff-Roos J, Andersen AN. Maternal risks and perinatal outcome in a Danish national cohort of 1005 twin pregnancies: the role of in vitro fertilization. *Acta Obstet Gynecol Scand*. 2004 Jan;83(1):75-84.

2781. Pinto SM, Dodd S, Walkinshaw SA, Siney C, Kakkar P, Mousa HA. Substance abuse during pregnancy: effect on pregnancy outcomes. *European journal of obstetrics, gynecology, and reproductive biology*. 2010 Jun;150(2):137-41.

2782. Pipkin FB. Smoking in moderate/severe preeclampsia worsens pregnancy outcome, but smoking cessation limits the damage. *Hypertension*. 2008 April;51(4 PART 2 SUPPL.):1042-6.

2783. Pitakkarnkul S, Phaloprakarn C, Wiriyasirivaj B, Manusirivithaya S, Tangjitgamol S. Seasonal variation in the prevalence of preeclampsia. *Journal of the Medical Association of Thailand = Chotmai het thangphaet*. 2011 Nov;94(11):1293-8.

2784. Pittner A, Nalos M, Asfar P, Yang Y, Ince C, Georgieff M, et al. Mechanisms of inducible nitric oxide synthase (iNOS) inhibition-related improvement of gut mucosal acidosis during hyperdynamic porcine endotoxemia. *Intensive care medicine*. 2003 Feb;29(2):312-6.

2785. Plachouras D, Stamatakos M, Baziaka F, Giamarellos-Bourboulis E, Tsaganos T, Giamarellou H, et al. Portal and systemic endotoxemia in abdominal operations: the significance of acute abdomen. *The Journal of surgical research*. 2006 Jul;134(1):133-7.

2786. Plasencia W, Maiz N, Bonino S, Kaihura C, Nicolaidis KH. Uterine artery Doppler at 11 + 0 to 13 + 6 weeks in the prediction of pre-eclampsia. *Ultrasound Obstet Gynecol.* 2007 Oct;30(5):742-9.
2787. Plasencia W, Maiz N, Poon L, Yu C, Nicolaidis KH. Uterine artery Doppler at 11 + 0 to 13 + 6 weeks and 21 + 0 to 24 + 6 weeks in the prediction of pre-eclampsia. *Ultrasound Obstet Gynecol.* 2008 Aug;32(2):138-46.
2788. Plunkett J, Borecki I, Morgan T, Stamilio D, Muglia LJ. Population-based estimate of sibling risk for preterm birth, preterm premature rupture of membranes, placental abruption and pre-eclampsia. *BMC genetics.* 2008;9:44.
2789. Poggi SH, Barr S, Cannum R, Collea JV, Landy HJ, Kezsler M, et al. Risk factors for pulmonary edema in triplet pregnancies. *Journal of Perinatology.* 2003 September;23(6):462-5.
2790. Polat I, Gedikbasi A, Kiyak H, Gulac B, Atis A, Goynumer G, et al. Double notches: Association of uterine artery notch forms with pregnancy outcome and severity of preeclampsia. *Hypertension in pregnancy.* 2015 01 Feb;34(1):90-101.
2791. Polavarapu SS, Parton LA, Maramreddy H, Hsu CD. Are placental Fas and Fas ligand gene polymorphisms associated with preeclampsia? *Pregnancy Hypertension.* 2013 January;3(1):34-8.
2792. Pongroj paw D, Chanthasenanont A, Nanthakomon T. Second trimester uterine artery Doppler screening in prediction of adverse pregnancy outcome in high risk women. *Journal of the Medical Association of Thailand = Chotmaihet thangphaet.* 2010 Dec;93 Suppl 7:S127-30.
2793. Pontello D, Ianni A, Driul L, Della Martina M, Veronese P, Chiandotto V, et al. Prenatal risk factors for intraventricular hemorrhage, neonatal death and impaired psychomotor development in very low birth weight infants. *Minerva Ginecol.* 2008 Jun;60(3):223-9.
2794. Pontello D, Ianni A, Driul L, Della Martina M, Veronese P, Chiandotto V, et al. Prenatal risk factors for intraventricular hemorrhage, neonatal death and impaired psychomotor development in very low birth weight infants. *Minerva Ginecologica.* 2008 June;60(3):223-9.
2795. Poon LC, Kametas N, Bonino S, Vercellotti E, Nicolaidis KH. Urine albumin concentration and albumin-to-creatinine ratio at 11(+0) to 13(+6) weeks in the prediction of pre-eclampsia. *Bjog.* 2008 Jun;115(7):866-73.
2796. Poon LC, Kametas NA, Chelemen T, Leal A, Nicolaidis KH. Maternal risk factors for hypertensive disorders in pregnancy: a multivariate approach. *Journal of human hypertension.* 2010 Feb;24(2):104-10.
2797. Poon LC, Kametas NA, Maiz N, Akolekar R, Nicolaidis KH. First-trimester prediction of hypertensive disorders in pregnancy. *Hypertension.* 2009 May;53(5):812-8.
2798. Poon LC, Karagiannis G, Leal A, Romero XC, Nicolaidis KH. Hypertensive disorders in pregnancy: screening by uterine artery Doppler imaging and blood pressure at 11-13 weeks. *Ultrasound Obstet Gynecol.* 2009 Nov;34(5):497-502.
2799. Poon LC, Karagiannis G, Staboulidou I, Shafiei A, Nicolaidis KH. Reference range of birth weight with gestation and first-trimester prediction of small-for-gestation neonates. *Prenatal diagnosis.* 2011 Jan;31(1):58-65.
2800. Poon LC, Maiz N, Valencia C, Plasencia W, Nicolaidis KH. First-trimester maternal serum pregnancy-associated plasma protein-A and pre-eclampsia. *Ultrasound Obstet Gynecol.* 2009 Jan;33(1):23-33.
2801. Poon LC, Zymeri NA, Zamprakou A, Syngelaki A, Nicolaidis KH. Protocol for measurement of mean arterial pressure at 11-13 weeks' gestation. *Fetal Diagn Ther.* 2012;31(1):42-8.
2802. Poon LCY, Staboulidou I, Maiz N, Plasencia W, Nicolaidis KH. Hypertensive disorders in pregnancy: Screening by uterine artery Doppler at 11-13 weeks. *Ultrasound in Obstetrics and Gynecology.* 2009 August;34(2):142-8.
2803. Poon LCY, Stratieva V, Piras S, Piri S, Nicolaidis KH. Hypertensive disorders in pregnancy: Combined screening by uterine artery Doppler, blood pressure and serum PAPP-A at 11-13 weeks.

Prenatal diagnosis. 2010 March;30(3):216-23.

2804. Poonyth L, Sobhee R, Soomaree R. Epidemiology of preeclampsia in Mauritius island. *J Reprod Immunol*. 2003 Aug;59(2):101-9.

2805. Porreco RP, Harden L, Gambotto M, Shapiro H. Expectation of pregnancy outcome among mature women. *Am J Obstet Gynecol*. 2005 Jan;192(1):38-41.

2806. Postma IR, Bouma A, Ankersmit IF, Zeeman GG. Neurocognitive functioning following preeclampsia and eclampsia: a long-term follow-up study. *Am J Obstet Gynecol*. 2014 Jul;211(1):37.e1-9.

2807. Poston L, Briley A, Seed P, Kelly F, Shennan A. Vitamin C and vitamin E in pregnant women at risk for pre-eclampsia (VIP trial): randomised placebo-controlled trial. *Lancet*. 2006 08 Apr;367(9517):1145-54.

2808. Potischman N, Troisi R, Thadhani R, Hoover RN, Dodd K, Davis WW, et al. Pregnancy hormone concentrations across ethnic groups: implications for later cancer risk. *Cancer epidemiology, biomarkers & prevention : a publication of the American Association for Cancer Research, cosponsored by the American Society of Preventive Oncology*. 2005 Jun;14(6):1514-20.

2809. Poulasouchidou MK, Goulis DG, Poulakos P, Mintzioti G, Athanasiadis A, Grimbizis G, et al. Prediction of maternal and neonatal adverse outcomes in pregnant women treated for hypothyroidism. *Hormones*. 2012 October-December;11(4):468-76.

2810. Pourali L, Ayati S, Vahidroodsari F, Javanmard M, Poursadrollah F. Incomplete molar pregnancy with live coexisting fetus: A case report. *Tehran University Medical Journal*. 2014;71(12):821-4.

2811. Pourmand G, Dehghani S, Rahmati MR, Mehraei A, Gooran S, Alizadeh F, et al. Does hypertension remain after kidney transplantation? *Acta Medica Iranica*. 2015;53(5):298-301.

2812. Pourrat O, Pierre F. Late prognosis after preeclampsia. [French, English] *Pronostic obstetrical, renal et vasculaire a long terme dans les suites de la preeclampsie. Annales Francaises d'Anesthesie et de Reanimation*. 2010 May;29(5):e155-e60.

2813. Poursharif B, Korst LM, Fejzo MS, MacGibbon KW, Romero R, Goodwin TM. The psychosocial burden of hyperemesis gravidarum. *Journal of Perinatology*. 2008 March;28(3):176-81.

2814. Poursharif B, Korst LM, MacGibbon KW, Fejzo MS, Romero R, Goodwin TM. Elective pregnancy termination in a large cohort of women with hyperemesis gravidarum. *Contraception*. 2007 December;76(6):451-5.

2815. Pouta A, Hartikainen AL, Sovio U, Gissler M, Laitinen J, McCarthy MI, et al. Manifestations of metabolic syndrome after hypertensive pregnancy. *Hypertension*. 2004 Apr;43(4):825-31.

2816. Povitz M, Tangri N. A young woman with dyspnea. *Can J Cardiol*. 2008 Jul;24(7):e41-2.

2817. Powe CE, Ecker J, Rana S, Wang A, Ankers E, Ye J, et al. Preeclampsia and the risk of large-for-gestational-age infants. *American Journal of Obstetrics and Gynecology*. 2011 May;204(5):425.e1-.e6.

2818. Powe CE, Thadhani R. Diabetes and the Kidney in Pregnancy. *Seminars in Nephrology*. 2011 January;31(1):59-69.

2819. Powers RW, Dunbar MS, Gallaher MJ, Roberts JM. The 677 C-T methylenetetrahydrofolate reductase mutation does not predict increased maternal homocysteine during pregnancy. *Obstet Gynecol*. 2003 Apr;101(4):762-6.

2820. Powis KM, McElrath TF, Hughes MD, Ogwu A, Souda S, Datwyler SA, et al. High viral load and elevated angiogenic markers associated with increased risk of preeclampsia among women initiating highly active antiretroviral therapy in pregnancy in the Mma Bana study, Botswana. *Journal of acquired immune deficiency syndromes (1999)*. 2013 Apr 15;62(5):517-24.

2821. Prabhu TRB. Cerebrovascular complications in pregnancy and puerperium. *Journal of Obstetrics and Gynecology of India*. 2013 April;63(2):108-11.

2822. Pradhan P, Poudel S, Maharjan A. Still-birth--a tragic journey: a critical analysis. *Nepal Med Coll J*. 2010 Dec;12(4):239-43.

2823. Prajapati SR, Maitra N. Prediction of pre-eclampsia by a combination of maternal history, uterine artery doppler, and mean arterial pressure (A Prospective Study of 200 Cases). *Journal of Obstetrics and Gynecology of India*. 2013 March;63(1):32-6.
2824. Prakash J, Kumar H, Sinha DK, Kedalya PG, Pandey LK, Srivastava PK, et al. Acute renal failure in pregnancy in a developing country: twenty years of experience. *Ren Fail*. 2006;28(4):309-13.
2825. Prakash J, Pandey LK, Singh AK, Kar B. Hypertension in pregnancy: Hospital based study. *Journal of Association of Physicians of India*. 2006 April;54(APR.):273-8.
2826. Prakash J, Vohra R, Pandey LK, Niwas SS, Behura SK, Singh U. Spectrum of kidney diseases in patients with preeclampsia-eclampsia. *J Assoc Physicians India*. 2010 Sep;58:543-6.
2827. Prasad GS, Bhupali A, Prasad S, Patil AN, Deka Y. Peripartum cardiomyopathy - Case series. *Indian Heart Journal*. 2014 March-April;66(2):223-6.
2828. Prefumo F, Guven M, Ganapathy R, Thilaganathan B. The longitudinal variation in uterine artery blood flow pattern in relation to birth weight. *Obstetrics and Gynecology*. 2004 April;103(4):764-8.
2829. Prescott GJ, Garthwaite PH. A Bayesian approach to prospective binary outcome studies with misclassification in a binary risk factor. *Statistics in Medicine*. 2005 30 Nov;24(22):3463-77.
2830. Proctor LK, Whittle WL, Keating S, Viero S, Kingdom JC. Pathologic basis of echogenic cystic lesions in the human placenta: role of ultrasound-guided wire localization. *Placenta*. 2010 Dec;31(12):1111-5.
2831. Prual A, Bouvier-Colle MH, De Bernis L, Breart G. Severe maternal morbidity from direct obstetric causes in West Africa: Incidence and case fatality rates. *Bulletin of the World Health Organization*. 2000;78(5):593-602.
2832. Prusac IK, Zekic Tomas S, Roje D. Apoptosis, proliferation and Fas ligand expression in placental trophoblast from pregnancies complicated by HELLP syndrome or pre-eclampsia. *Acta Obstet Gynecol Scand*. 2011 Oct;90(10):1157-63.
2833. Ptolemy AS. Biomarker diversity, validation and clinical translation: Tenets for emergent personalized medicine initiatives. *Current Pharmacogenomics and Personalized Medicine*. 2011 December;9(4):286-98.
2834. Pueyo V, Gonzalez I, Altemir I, Perez T, Gomez G, Prieto E, et al. Microstructural changes in the retina related to prematurity. *American Journal of Ophthalmology*. 2015 01 Apr;159(4):797-802.
2835. Pugh SK, Doherty DA, Magann EF, Chauhan SP, Hill JB, Morrison JC. Does hypoglycemia following a glucose challenge test identify a high risk pregnancy? *Reproductive Health*. 2009;6(1).
2836. Pussinen PJ, Havulinna AS, Lehto M, Sundvall J, Salomaa V. Endotoxemia is associated with an increased risk of incident diabetes. *Diabetes Care*. 2011 Feb;34(2):392-7.
2837. Pussinen PJ, Tuomisto K, Jousilahti P, Havulinna AS, Sundvall J, Salomaa V. Endotoxemia, immune response to periodontal pathogens, and systemic inflammation associate with incident cardiovascular disease events. *Arterioscler Thromb Vasc Biol*. 2007 Jun;27(6):1433-9.
2838. Qiu C, Hevner K, Enquobahrie DA, Williams MA. A case-control study of maternal blood mitochondrial DNA copy number and preeclampsia risk. *International Journal of Molecular Epidemiology and Genetics*. 2012;3(3):237-44.
2839. Qiu C, Luthy DA, Zhang C, Walsh SW, Leisenring WM, Williams MA. A prospective study of maternal serum C-reactive protein concentrations and risk of preeclampsia. *American journal of hypertension*. 2004 Feb;17(2):154-60.
2840. Qiu C, Phung TTT, Vadachkoria S, Muy-Rivera M, Sanchez SE, Williams MA. Oxidized low-density lipoprotein (oxidized LDL) and the risk of preeclampsia. *Physiological Research*. 2006;55(5):491-500.
2841. Qiu C, Saito S, Sakai M, Ogawa K, Nagata K, Williams MA. Plasma granulysin concentrations and preeclampsia risk. *Clinical Biochemistry*. 2006 October;39(10):1016-21.
2842. Qiu C, Williams MA, Calderon-Margalit R, Cripe SM, Sorensen TK. Preeclampsia risk in relation to maternal mood and anxiety disorders diagnosed before or during early pregnancy. *American journal of*

hypertension. 2009 Apr;22(4):397-402.

2843. Qiu J, Zhou M, Wang Y, Du Y. Increasing maternal percentage body fat in early second trimester: A risk factor for preeclampsia. *Journal of Maternal-Fetal and Neonatal Medicine*. 2015 01 Feb;28(3):293-6.

2844. Qublan HS, Ammarin V, Bataineh O, Al-Shraideh Z, Tahat Y, Awamleh I, et al. Lactic dehydrogenase as a biochemical marker of adverse pregnancy outcome in severe pre-eclampsia. *Medical science monitor : international medical journal of experimental and clinical research*. 2005 Aug;11(8):Cr393-7.

2845. Quinn D, Cooper B, Clyman RI. Factors associated with permanent closure of the ductus arteriosus: a role for prolonged indomethacin therapy. *Pediatrics*. 2002 Jul;110(1 Pt 1):e10.

2846. Raatikainen K, Mustonen J, Pajala MO, Heikkinen M, Heinonen S. The effects of pre- and post-pregnancy inflammatory bowel disease diagnosis on birth outcomes. *Alimentary Pharmacology and Therapeutics*. 2011 February;33(3):333-9.

2847. Radeka G, Novakov-Mikic A, Mitic I. Systemic lupus erythematosus in pregnancy--case report. *Medicinski pregled*. 2005 2005;58(5-6):301-7.

2848. Radoi V, Bohiltea LC. Pregnancy-associated plasma protein A and pregnancy outcomes. *Ginecoro*. 2009 February;5(1):16-20.

2849. Raghuraman N, March MI, Hacker MR, Modest AM, Wenger J, Narcisse R, et al. Adverse maternal and fetal outcomes and deaths related to preeclampsia and eclampsia in Haiti. *Pregnancy Hypertension*. 2014 01 Oct;4(4):279-86.

2850. Rahbar N, Ghorbani R, Yahyaei E. Investigating the relation between the NT size in fetus and the adverse outcomes of pregnancy. *Iranian Journal of Obstetrics, Gynecology and Infertility*. 2012 December;15(29):8-13.

2851. Rahman S, Ratan DG, Islam N, Das A, Shaha AK, Khan MAI, et al. Pregnancy related acute renal failure in a tertiary care hospital in Bangladesh. *Journal of Medicine (Bangladesh)*. 2012;13(2):129-32.

2852. Rajmakers MTM, Roes EM, Zusterzeel PLM, Steegers EAP, Peters WHM. Thiol status and antioxidant capacity in women with a history of severe pre-eclampsia. *BJOG: An International Journal of Obstetrics and Gynaecology*. 2004 March;111(3):207-12.

2853. Raikkonen K, O'Reilly JR, Pesonen AK, Kajantie E, Villa P, Laivuori H, et al. Associations between maternal level of education and occupational status with placental glucocorticoid regeneration and sensitivity. *Clin Endocrinol (Oxf)*. 2014 Aug;81(2):175-82.

2854. Raio L, Ghezzi F, Di Naro E, Franchi M, Bolla D, Schneider H. Altered sonographic umbilical cord morphometry in early-onset preeclampsia. *Obstet Gynecol*. 2002 Aug;100(2):311-6.

2855. Raisanen S, Gissler M, Nielsen HS, Kramer MR, Williams MA, Heinonen S. Social disparity affects the incidence of placental abruption among multiparous but not nulliparous women: a register-based analysis of 1,162,126 singleton births. *European journal of obstetrics, gynecology, and reproductive biology*. 2013 Dec;171(2):246-51.

2856. Raisanen S, Randell K, Nielsen HS, Gissler M, Kramer MR, Klemetti R, et al. Socioeconomic status affects the prevalence, but not the perinatal outcomes, of in vitro fertilization pregnancies. *Human reproduction*. 2013 Nov;28(11):3118-25.

2857. Rajab KE, Essa A, Masaudi E. A hospital-based epidemiologic study of hypertensive disease in pregnancy. *Journal of the Bahrain Medical Society*. 2007 April;19(2):63-8.

2858. Rajasingam D, Seed PT, Briley AL, Shennan AH, Poston L. A prospective study of pregnancy outcome and biomarkers of oxidative stress in nulliparous obese women. *Am J Obstet Gynecol*. 2009 Apr;200(4):395.e1-9.

2859. Ramavath KK, Pasumarthy SM. Postmyomectomy Reproductive Outcome in Women above 35 years. *International Journal of Infertility and Fetal Medicine*. 2011 May-August;2(2):71-5.

2860. Rambaldi MP, Mecacci F, Guaschino S, Paidas MJ. Inherited and acquired thrombophilias.

Reprod Sci. 2014 Feb;21(2):167-82.

2861. Ramesh Kumar R, Patil M, Sa S. The utility of caesarean myomectomy as a safe procedure: A retrospective analysis of 21 cases with review of literature. *Journal of Clinical and Diagnostic Research*. 2014 September;8(9):OC05-OC8.

2862. Ramlau-Hansen CH, Olesen AV, Parner ET, Sorensen HT, Olsen J. Perinatal markers of estrogen exposure and risk of testicular cancer: follow-up of 1,333,873 Danish males born between 1950 and 2002. *Cancer causes & control : CCC*. 2009 Nov;20(9):1587-92.

2863. Ramos GA, Caughey AB. The interrelationship between ethnicity and obesity on obstetric outcomes. *Am J Obstet Gynecol*. 2005 Sep;193(3 Pt 2):1089-93.

2864. Ramos GA, Jacobson GF, Kirby RS, Ching JY, Field DR. Comparison of glyburide and insulin for the management of gestational diabetics with markedly elevated oral glucose challenge test and fasting hyperglycemia. *Journal of perinatology : official journal of the California Perinatal Association*. 2007 May;27(5):262-7.

2865. Ramos JGL, Brietzke E, Martins-Costa SH, Vettorazzi-Stuczynski J, Barros E, Carvalho C. Reported calcium intake is reduced in women with preeclampsia. *Hypertension in pregnancy*. 2006 01 Sep;25(3):229-39.

2866. Rampello S, Frigerio L, Ricci E, Rota E, Lucianetti M, Parazzini F. Transabdominal uterine arteries Doppler at 12-14th and 20-24th week of gestation and pregnancy outcome: a prospective study. *European journal of obstetrics, gynecology, and reproductive biology*. 2009 Dec;147(2):135-8.

2867. Rana A, Baral G, Dangal G. Maternal near-miss: a multicenter surveillance in Kathmandu Valley. *JNMA; journal of the Nepal Medical Association*. 2013 Apr-Jun;52(190):299-304.

2868. Rana S, Hacker MR, Modest AM, Salahuddin S, Lim KH, Verlohren S, et al. Circulating angiogenic factors and risk of adverse maternal and perinatal outcomes in twin pregnancies with suspected preeclampsia. *Hypertension*. 2012 Aug;60(2):451-8.

2869. Rana S, Powe CE, Salahuddin S, Verlohren S, Perschel FH, Levine RJ, et al. Angiogenic factors and the risk of adverse outcomes in women with suspected preeclampsia. *Circulation*. 2012 Feb 21;125(7):911-9.

2870. Rana S, Schnettler WT, Powe C, Wenger J, Salahuddin S, Cerdeira AS, et al. Clinical characterization and outcomes of preeclampsia with normal angiogenic profile. *Hypertension in pregnancy*. 2013 May;32(2):189-201.

2871. Rang S, Wolf H, van Montfrans GA, Karemaker JM. Serial assessment of cardiovascular control shows early signs of developing pre-eclampsia. *J Hypertens*. 2004 Feb;22(2):369-76.

2872. Rao AK, Daniels K, El-Sayed YY, Moshesh MK, Caughey AB. Perinatal outcomes among Asian American and Pacific Islander women. *Am J Obstet Gynecol*. 2006 Sep;195(3):834-8.

2873. Rasheed SM, Abdel Monem AM, Abd Ellah AH, Abdel Fattah MS. Prognosis and determinants of pregnancy outcome among patients with post-hepatitis liver cirrhosis. *International Journal of Gynecology and Obstetrics*. 2013 June;121(3):247-51.

2874. Rasmussen A, Ravn P. High frequency of congenital thrombophilia in women with pathological pregnancies? *Acta Obstet Gynecol Scand*. 2004 Sep;83(9):808-17.

2875. Rasmussen S. Abruptio placentae - Relationship with other placental dysfunction related conditions. *Norsk Epidemiologi*. 2007 October;17(2):191-7.

2876. Rasmussen S, Irgens LM. Fetal growth and body proportion in preeclampsia. *Obstet Gynecol*. 2003 Mar;101(3):575-83.

2877. Rasmussen S, Irgens LM, Albrechtsen S, Dalaker K. Predicting preeclampsia in the second pregnancy from low birth weight in the first pregnancy. *Obstet Gynecol*. 2000 Nov;96(5 Pt 1):696-700.

2878. Rasmussen S, Irgens LM, Skjaerven R, Melve KK. Prior adverse pregnancy outcome and the risk of stillbirth. *Obstet Gynecol*. 2009 Dec;114(6):1259-70.

2879. Rassjo EB, Byrskog U, Samir R, Klingberg-Allvin M. Somali women's use of maternity health

services and the outcome of their pregnancies: a descriptive study comparing Somali immigrants with native-born Swedish women. *Sexual & reproductive healthcare : official journal of the Swedish Association of Midwives*. 2013 Oct;4(3):99-106.

2880. Rasul S. Clinical characteristics and risk factors for infantile hemangioma-A case control study. *European Journal of Pediatric Surgery*. 2014 February;24(1):102-12.

2881. Ratanasiri T. Prediction of preeclampsia in a low-risk population using diastolic notch of uterine arteries. *Journal of the Medical Association of Thailand = Chotmai het thangphaet*. 2004 Oct;87 Suppl 3:S29-33.

2882. Ratanasiri T, Komwilaisak R, Sittivech A, Kleebkeaw P, Seejorn K. Incidence, causes and pregnancy outcomes of hydrops fetalis at Srinagarind Hospital, 1996-2005: a 10-year review. *Journal of the Medical Association of Thailand = Chotmai het thangphaet*. 2009 May;92(5):594-9.

2883. Rath MEA, Smits-Wintjens VEJ, Oepkes D, van Zwet EW, van Kamp IL, Brand A, et al. Thrombocytopenia at birth in neonates with red cell alloimmune haemolytic disease. *Vox Sanguinis*. 2012 April;102(3):228-33.

2884. Rath W. Pre-eclampsia and inherited thrombophilia: A reappraisal. *Seminars in Thrombosis and Hemostasis*. 2011;37(2):118-24.

2885. Rathi U, Bapat M, Rathi P, Abraham P. Effect of liver disease on maternal and fetal outcome--a prospective study. *Indian journal of gastroenterology : official journal of the Indian Society of Gastroenterology*. 2007 Mar-Apr;26(2):59-63.

2886. Rathi U, Bapat M, Rathi P, Abraham P. Effect of liver disease on maternal and fetal outcome a prospective study. *Indian Journal of Gastroenterology*. 2007 March/April;26(2):59-63.

2887. Rauh K, Kunath J, Rosenfeld E, Kick L, Ulm K, Hauner H. Healthy living in pregnancy: A cluster-randomized controlled trial to prevent excessive gestational weight gain - rationale and design of the GeliS study. *BMC pregnancy and childbirth*. 2014 28 Mar;14(1).

2888. Ray JG, Burrows RF, Burrows EA, Vermeulen MJ. MOS HIP: McMaster outcome study of hypertension in pregnancy. *Early Hum Dev*. 2001 Sep;64(2):129-43.

2889. Ray JG, Diamond P, Singh G, Bell CM. Brief overview of maternal triglycerides as a risk factor for pre-eclampsia. *Bjog*. 2006 Apr;113(4):379-86.

2890. Ray JG, Redelmeier DA, Urquia ML, Guttmann A, McDonald SD, Vermeulen MJ. Risk of cerebral palsy among the offspring of immigrants. *PloS one*. 2014 14 Jul;9(7).

2891. Ray JG, Schull MJ, Kingdom JC, Vermeulen MJ. Heart failure and dysrhythmias after maternal placental syndromes: HAD MPS Study. *Heart*. 2012 Aug;98(15):1136-41.

2892. Ray JG, Urquia ML, Berger H, Vermeulen MJ. Maternal and neonatal separation and mortality associated with concurrent admissions to intensive care units. *Cmaj*. 2012 Dec 11;184(18):E956-62.

2893. Ray JG, Vermeulen MJ, Burrows EA, Burrows RF. Use of antihypertension medications in pregnancy and the risk of adverse perinatal outcomes: McMaster Outcome Study of Hypertension In Pregnancy 2 (MOS HIP 2). *BMC pregnancy and childbirth*. 2001 23 Nov;1(6).

2894. Ray JG, Vermeulen MJ, Schull MJ, McDonald S, Redelmeier DA. Metabolic syndrome and the risk of placental dysfunction. *Journal of obstetrics and gynaecology Canada : JOGC = Journal d'obstetrique et gynecologie du Canada : JOGC*. 2005 Dec;27(12):1095-101.

2895. Ray JG, Vermeulen MJ, Schull MJ, Redelmeier DA. Cardiovascular health after maternal placental syndromes (CHAMPS): population-based retrospective cohort study. *Lancet*. 2005 Nov 19;366(9499):1797-803.

2896. Ray JG, Vermeulen MJ, Schull MJ, Singh G, Shah R, Redelmeier DA. Results of the Recent Immigrant Pregnancy and Perinatal Long-term Evaluation Study (RIPPLES). *Cmaj*. 2007 May 8;176(10):1419-26.

2897. Ray JG, Vermeulen MJ, Shapiro JL, Kenshole AB. Maternal and neonatal outcomes in pregestational and gestational diabetes mellitus, and the influence of maternal obesity and weight gain:

the DEPOSIT study. Diabetes Endocrine Pregnancy Outcome Study in Toronto. QJM : monthly journal of the Association of Physicians. 2001 Jul;94(7):347-56.

2898. Ray JG, Vermeulen MJ, Shapiro JL, Kenshole AB. Maternal and neonatal outcomes in pregestational and gestational diabetes mellitus, and the influence of maternal obesity and weight gain: The DEPOSIT study. QJM - Monthly Journal of the Association of Physicians. 2001;94(7):347-56.

2899. Rayman MP, Wijnen H, Vader H, Kooistra L, Pop V. Maternal selenium status during early gestation and risk for preterm birth. Cmaj. 2011 Mar 22;183(5):549-55.

2900. Raz R, Roberts AL, Lyall K, Hart JE, Just AC, Laden F, et al. Autism spectrum disorder and particulate matter air pollution before, during, and after pregnancy: A nested case-control analysis within the nurses' health study II cohort. Environmental Health Perspectives. 2015;123(3):264-70.

2901. Rebordosa C, Kogevinas M, Bech BH, Sorensen HT, Olsen J. Use of acetaminophen during pregnancy and risk of adverse pregnancy outcomes. International journal of epidemiology. 2009 Jun;38(3):706-14.

2902. Rebordosa C, Zelop CM, Kogevinas M, Sorensen HT, Olsen J. Use of acetaminophen during pregnancy and risk of preeclampsia, hypertensive and vascular disorders: a birth cohort study. The journal of maternal-fetal & neonatal medicine : the official journal of the European Association of Perinatal Medicine, the Federation of Asia and Oceania Perinatal Societies, the International Society of Perinatal Obstet. 2010 May;23(5):371-8.

2903. Redline RW. Cerebral palsy in term infants: a clinicopathologic analysis of 158 medicolegal case reviews. Pediatric and developmental pathology : the official journal of the Society for Pediatric Pathology and the Paediatric Pathology Society. 2008 Nov-Dec;11(6):456-64.

2904. Redline RW, Wilson-Costello D, Hack M. Placental and other perinatal risk factors for chronic lung disease in very low birth weight infants. Pediatr Res. 2002 Nov;52(5):713-9.

2905. Ree PH, Hahn WB, Chang SW, Jung SH, Kang JH, Cha DH, et al. Early detection of preeclampsia using inhibin a and other second-trimester serum markers. Fetal Diagn Ther. 2011;29(4):280-6.

2906. Reed SD, Vollan TA, Svec MA. Pregnancy outcomes in women with rheumatoid arthritis in Washington State. Maternal and Child Health Journal. 2006 July;10(4):361-6.

2907. Reeves IV, Bamji ZD, Rosario GB, Lewis KM, Young MA, Washington KN. Vitamin D deficiency in pregnant women of ethnic minority: a potential contributor to preeclampsia. Journal of perinatology : official journal of the California Perinatal Association. 2014 Oct;34(10):767-73.

2908. Reggia R, Ziglioli T, Andreoli L, Bellisai F, Iuliano A, Gerosa M, et al. Primary anti-phospholipid syndrome: any role for serum complement levels in predicting pregnancy complications? Rheumatology (Oxford). 2012 Dec;51(12):2186-90.

2909. Reid J, Glew RA, Skomro R, Fenton M, Cotton D, Olatunbosun F, et al. Sleep disordered breathing and gestational hypertension: postpartum follow-up study. Sleep. 2013 May;36(5):717-21b.

2910. Reime B, Janssen PA, Farris L, Borde T, Hellmers C, Myezwa H, et al. Maternal near-miss among women with a migrant background in Germany. Acta Obstet Gynecol Scand. 2012 Jul;91(7):824-9.

2911. Reitter A, Stucker AU, Linde R, Konigs C, Knecht G, Herrmann E, et al. Pregnancy complications in HIV-positive women: 11-year data from the Frankfurt HIV Cohort. HIV Medicine. 2014;15(9):525-36.

2912. Rejno G, Lundholm C, Gong T, Larsson K, Saltvedt S, Almqvist C. Asthma during pregnancy in a population-based study - Pregnancy complications and adverse perinatal outcomes. PloS one. 2014 20 Aug;9(8).

2913. Remi J, Pfefferkorn T, Fesl G, Rogenhofer N, Straube A, Klein M. Uncomplicated pregnancy and delivery after previous severe postpartum cerebral angiopathy. Case Reports in Neurology. 2011;3(3):252-7.

2914. Rep A, Ganzevoort W, Van Wassenaer AG, Bonsel GJ, Wolf H, De Vries JIP. One-year infant outcome in women with early-onset hypertensive disorders of pregnancy. BJOG: An International Journal of Obstetrics and Gynaecology. 2008 January;115(2):290-8.



2915. Resch B, Vollaard E, Maurer U, Haas J, Rosegger H, Muller W. Risk factors and determinants of neurodevelopmental outcome in cystic periventricular leucomalacia. *Eur J Pediatr.* 2000 Sep;159(9):663-70.
2916. Rettwitz-Volk W, Tran TM, Veldman A. Cerebral morbidity in preterm twins. *Journal of Maternal-Fetal and Neonatal Medicine.* 2003 01 Apr;13(4):218-23.
2917. Revello R, De la Calle M, Moreno E, Duyos I, Salas P, Zapardiel I. Maternal morbidity on 147 triplets: single institution experience. *The journal of maternal-fetal & neonatal medicine : the official journal of the European Association of Perinatal Medicine, the Federation of Asia and Oceania Perinatal Societies, the International Society of Perinatal Obstet.* 2013 Jan;26(2):193-6.
2918. Reveret M, Boivin A, Guignonis V, Audibert F, Nuyt AM. Preeclampsia: Effect on newborn blood pressure in the 3 days following preterm birth: A cohort study. *Journal of human hypertension.* 2015 01 Jan;29(2):115-21.
2919. Rey E, Rivard GE. Is testing for aspirin response worthwhile in high-risk pregnancy? *European journal of obstetrics, gynecology, and reproductive biology.* 2011 Jul;157(1):38-42.
2920. Reyes OA, Gonzalez GM. Carbetocin versus oxytocin for prevention of postpartum hemorrhage in patients with severe preeclampsia: a double-blind randomized controlled trial. *Journal of obstetrics and gynaecology Canada : JOGC = Journal d'obstetrique et gynecologie du Canada : JOGC.* 2011 Nov;33(11):1099-104.
2921. Reyes-Munoz E, Castellanos-Barroso G, Ramirez-Eugenio BY, Ortega-Gonzalez C, Parra A, Castillo-Mora A, et al. The risk of gestational diabetes mellitus among Mexican women with a history of infertility and polycystic ovary syndrome. *Fertility and sterility.* 2012 Jun;97(6):1467-71.
2922. Reynolds LC, Inder TE, Neil JJ, Pineda RG, Rogers CE. Maternal obesity and increased risk for autism and developmental delay among very preterm infants. *Journal of Perinatology.* 2014 September;34(9):688-92.
2923. Rhim MS, Meddeb S, Kaabia O, Jalloul M, Sakouhi M, Jrzad BBH, et al. C3F gene mutation is involved in the susceptibility to pre-eclampsia. *Archives of Gynecology and Obstetrics.* 2015;291(5):1023-7.
2924. Richardson BE, Peck JD, Wormuth JK. Mean arterial pressure, pregnancy-induced hypertension, and preeclampsia: Evaluation as independent risk factors and as surrogates for high maternal serum alpha-fetoprotein in estimating breast cancer risk. *Cancer Epidemiology Biomarkers and Prevention.* 2000;9(12):1349-55.
2925. Richardson DB, Wing S, Lorey F, Hertz-Picciotto I. Adult hemoglobin levels at birth and risk of sudden infant death syndrome. *Archives of pediatrics & adolescent medicine.* 2004 Apr;158(4):366-71.
2926. Riche EL, Boggess KA, Lief S, Murtha AP, Auten RL, Beck JD, et al. Periodontal disease increases the risk of preterm delivery among preeclamptic women. *Ann Periodontol.* 2002 Dec;7(1):95-101.
2927. Rich-Edwards JW, Fraser A, Lawlor DA, Catov JM. Pregnancy characteristics and women's future cardiovascular health: An underused opportunity to improve women's health? *Epidemiologic reviews.* 2014;36(1):57-70.
2928. Ridding G, Schluter PJ, Hyett JA, McLennan AC. Uterine artery pulsatility index assessment at 11-13+6 weeks' gestation. *Fetal Diagnosis and Therapy.* 2014 17 Dec;36(4):299-304.
2929. Ridding G, Schluter PJ, Hyett JA, McLennan AC. Influence of sampling site on uterine artery Doppler indices at 11-13+6 weeks gestation. *Fetal Diagnosis and Therapy.* 2015 28 May;37(4):310-5.
2930. Rifas-Shiman SL, Rich-Edwards JW, Kleinman KP, Oken E, Gillman MW. Dietary quality during pregnancy varies by maternal characteristics in Project Viva: a US cohort. *J Am Diet Assoc.* 2009 Jun;109(6):1004-11.
2931. Rifouna MS, Reus AD, Koning AHJ, Van Der Spek PJ, Exalto N, Steegers EAP, et al. First trimester trophoblast and placental bed vascular volume measurements in IVF or IVF/ICSI pregnancies. *Human*

reproduction. 2014 26 Jun;29(12):2644-9.

2932. Rijvers CAH, Marzano S, Winkens B, Bakker JA, Kroon AA, Spaanderman MEA, et al.

Early-pregnancy asymmetric dimethylarginine (ADMA) levels in women prone to develop recurrent hypertension. *Pregnancy Hypertension*. 2013 April;3(2):118-23.

2933. Ringholm L, Pedersen-Bjergaard U, Thorsteinsson B, Boomsma F, Damm P, Mathiesen ER. A high concentration of prorenin in early pregnancy is associated with development of pre-eclampsia in women with type 1 diabetes. *Diabetologia*. 2011 Jul;54(7):1615-9.

2934. Rishi E, Rishi P, Sengupta S, Jambulingam M, Madhavan HN, Gopal L, et al. Acute postoperative *Bacillus cereus* endophthalmitis mimicking toxic anterior segment syndrome. *Ophthalmology*. 2013 Jan;120(1):181-5.

2935. Riskin-Mashiah S, Belfort MA. Cerebrovascular hemodynamics in chronic hypertensive pregnant women who later develop superimposed preeclampsia. *J Soc Gynecol Investig*. 2005 Jan;12(1):28-32.

2936. Riskin-Mashiah S, Belfort MA, Saade GR, Herd JA. Transcranial doppler measurement of cerebral velocity indices as a predictor of preeclampsia. *Am J Obstet Gynecol*. 2002 Dec;187(6):1667-72.

2937. Rizzo R, Andersen AS, Lassen MR, Sorensen HC, Bergholt T, Larsen MH, et al. Soluble human leukocyte antigen-G isoforms in maternal plasma in early and late pregnancy. *American journal of reproductive immunology (New York, NY : 1989)*. 2009 Nov;62(5):320-38.

2938. Roberge S, Nicolaides KH, Demers S, Villa P, Bujold E. Prevention of perinatal death and adverse perinatal outcome using low-dose aspirin: a meta-analysis. *Ultrasound Obstet Gynecol*. 2013 May;41(5):491-9.

2939. Roberts AL, Lyall K, Rich-Edwards JW, Ascherio A, Weisskopf MG. Association of maternal exposure to childhood abuse with elevated risk for autism in offspring. *JAMA Psychiatry*. 2013 May;70(5):508-15.

2940. Roberts JM. The relationship of hypovitaminosis D and IL-6 in preeclampsia. *American journal of obstetrics and gynecology*. 2014 01 Feb;210(2):149.e1-7.

2941. Roberts JM, Myatt L, Spong CY, Thom EA, Hauth JC, Leveno KJ, et al. Vitamins C and E to prevent complications of pregnancy-associated hypertension. *New England Journal of Medicine*. 2010 08 Apr;362(14):1282-91.

2942. Robinson CJ, Hill EG, Alanis MC, Chang EY, Johnson DD, Almeida JS. Examining the effect of maternal obesity on outcome of labor induction in patients with preeclampsia. *Hypertension in pregnancy*. 2010;29(4):446-56.

2943. Robinson HE, O'Connell CM, Joseph KS, McLeod NL. Maternal outcomes in pregnancies complicated by obesity. *Obstetrics and Gynecology*. 2005 December;106(6):1357-64.

2944. Robinson M, Mattes E, Oddy WH, de Klerk NH, Li J, McLean NJ, et al. Hypertensive Diseases of Pregnancy and the Development of Behavioral Problems in Childhood and Adolescence: The Western Australian Pregnancy Cohort Study. *Journal of Pediatrics*. 2009 February;154(2):218-24.e2.

2945. Robinson M, Oddy WH, Whitehouse AJ, Pennell CE, Kendall GE, McLean NJ, et al. Hypertensive diseases of pregnancy predict parent-reported difficult temperament in infancy. *Journal of developmental and behavioral pediatrics : JDBP*. 2013 Apr;34(3):174-80.

2946. Rocha A, Cardoso A, Malheiro J, Martins LS, Fonseca I, Braga J, et al. Pregnancy after kidney transplantation: graft, mother, and newborn complications. *Transplant Proc*. 2013 Apr;45(3):1088-91.

2947. Rochelson B, Vohra N, Darvishzadeh J, Pagano M. Low prepregnancy ideal weight: Height ratio in women with hyperemesis gravidarum. *Journal of Reproductive Medicine for the Obstetrician and Gynecologist*. 2003 01 Jun;48(6):422-4.

2948. Rode L, Nilas L, Wojdemann K, Tabor A. Obesity-related complications in Danish single cephalic term pregnancies. *Obstetrics and Gynecology*. 2005 March;105(3):537-42.

2949. Rodger MA. Anticoagulant prophylaxis for placenta mediated pregnancy complications. *Thrombosis Research*. 2011 February;127(SUPPL. 3):S76-S80.

2950. Rodger MA, Betancourt MT, Clark P, Lindqvist PG, Dizon-Townson D, Said J, et al. The association of factor V Leiden and prothrombin gene mutation and placenta-mediated pregnancy complications: A systematic review and meta-analysis of prospective cohort studies. *PLoS Medicine*. 2010;7(6).
2951. Rodger MA, Langlois NJ, de Vries JIP, Rey E, Gris JC, Martinelli I, et al. Low-molecular-weight heparin for prevention of placenta-mediated pregnancy complications: Protocol for a systematic review and individual patient data meta-analysis (AFFIRM). *Systematic Reviews*. 2015 May 01;3(1).
2952. Rodger MA, Walker MC, Smith GN, Wells PS, Ramsay T, Langlois NJ, et al. Is thrombophilia associated with placenta-mediated pregnancy complications? A prospective cohort study. *Journal of thrombosis and haemostasis : JTH*. 2014 Apr;12(4):469-78.
2953. Rodriguez-Garcia JL, Bertolaccini ML, Cuadrado MJ, Sanna G, Ateka-Barrutia O, Khamashta MA. Clinical manifestations of antiphospholipid syndrome (APS) with and without antiphospholipid antibodies (the so-called 'seronegative APS'). *Ann Rheum Dis*. 2012 Feb;71(2):242-4.
2954. Roeder HA, Dejbakhsh SZ, Parast MM, Laurent LC, Woelkers DA. Abnormal uterine artery Doppler velocimetry predicts adverse outcomes in patients with abnormal analytes. *Pregnancy Hypertension*. 2014 01 Oct;4(4):296-301.
2955. Roelofsen AC, van Pampus MG, Aarnoudse JG. The HELLP-syndrome; maternal-fetal outcome and follow up of infants. *J Perinat Med*. 2003;31(3):201-8.
2956. Roes EM, Raijmakers MT, Roelofs HM, Peters WH, Steegers EA. Urinary GSTP1-1 excretion is markedly increased in normotensive pregnancy as well as in preeclampsia. *J Nephrol*. 2005 Jul-Aug;18(4):405-8.
2957. Roes EM, Raijmakers MT, Schoonenberg M, Wanner N, Peters WH, Steegers EA. Physical well-being in women with a history of severe preeclampsia. *The journal of maternal-fetal & neonatal medicine : the official journal of the European Association of Perinatal Medicine, the Federation of Asia and Oceania Perinatal Societies, the International Society of Perinatal Obstet*. 2005 Jul;18(1):39-45.
2958. Roes EM, Sieben R, Raijmakers MT, Peters WH, Steegers EA. Severe preeclampsia is associated with a positive family history of hypertension and hypercholesterolemia. *Hypertension in pregnancy*. 2005;24(3):259-71.
2959. Rogenhofer N, Bohlmann MK, Beuter-Winkler P, Wurfel W, Rank A, Thaler CJ, et al. Prevention, management and extent of adverse pregnancy outcomes in women with hereditary antithrombin deficiency. *Ann Hematol*. 2014 Mar;93(3):385-92.
2960. Rogers BB, Momirova V, Dizon-Townson D, Wenstrom K, Samuels P, Sibai B, et al. Avascular villi, increased syncytial knots, and hypervascular villi are associated with pregnancies complicated by factor V Leiden mutation. *Pediatric and Developmental Pathology*. 2010 September;13(5):341-7.
2961. Rogers MS, Wang CC, Tam WH, Li CY, Chu KO, Chu CY. Oxidative stress in midpregnancy as a predictor of gestational hypertension and pre-eclampsia. *Bjog*. 2006 Sep;113(9):1053-9.
2962. Rogers S, Witz G, Anwar M, Hiatt M, Hegyi T. Antioxidant capacity and oxygen radical diseases in the preterm newborn. *Archives of Pediatrics and Adolescent Medicine*. 2000 June;154(6):544-8.
2963. Roine S, Poyhonen M, Timonen S, Tuisku S, Marttila R, Sulkava R, et al. Neurologic symptoms are common during gestation and puerperium in CADASIL. *Neurology*. 2005 Apr 26;64(8):1441-3.
2964. Roiz-Hernandez J, de JC-MJ, Fernandez-Mejia M. Human chorionic gonadotropin levels between 16 and 21 weeks of pregnancy and prediction of pre-eclampsia. *International journal of gynaecology and obstetrics: the official organ of the International Federation of Gynaecology and Obstetrics*. 2006 Feb;92(2):101-5.
2965. Rojas-Suarez J, Vigil-De Gracia P. Pre-eclampsia-eclampsia admitted to critical care unit. *The journal of maternal-fetal & neonatal medicine : the official journal of the European Association of Perinatal Medicine, the Federation of Asia and Oceania Perinatal Societies, the International Society of Perinatal Obstet*. 2012 Oct;25(10):2051-4.
2966. Roje D, Tomas SZ, Prusac IK, Capkun V, Tadin I. Trophoblast apoptosis in human term placentas

from pregnancies complicated with idiopathic intrauterine growth retardation. *Journal of Maternal-Fetal and Neonatal Medicine*. 2011 May;24(5):745-51.

2967. Roman H, Descargues G, Lopes M, Emery E, Clavier E, Diguët A, et al. Subarachnoid hemorrhage due to cerebral aneurysmal rupture during pregnancy. *Acta Obstet Gynecol Scand*. 2004 Apr;83(4):330-4.

2968. Roman H, Robillard PY, Hulsey TC, Laffitte A, Kouteich K, Marpeau L, et al. Obstetrical and neonatal outcomes in obese women. *West Indian Med J*. 2007 Oct;56(5):421-6.

2969. Romano-Lieber NS, Ribeiro E. Adverse drug events leading children to hospital emergency care. *Latin American Journal of Pharmacy*. 2012;31(5):714-9.

2970. Romero J, Spinedi E. Two-hour insulinemia after oral glucose overload and women at risk of pregnancy-induced hypertensive disorders. *Hypertension in pregnancy*. 2013 Nov;32(4):355-66.

2971. Romero-Gutierrez G, Espitia-Vera A, Ponce-Ponce de Leon AL, Huerta-Vargas LF. Risk factors of maternal death in Mexico. *Birth*. 2007 Mar;34(1):21-5.

2972. Romero-Gutierrez G, Gonzalez BOH. Persistence of hypertension in women with preeclampsia. *Persistencia de hipertension en mujeres con preeclampsia*. *Ginecologia y Obstetricia de Mexico*. 2011 October;79(10):601-6.

2973. Romero-Gutierrez G, Malacara JM, Amador N, Fierro-Martinez C, Munoz-Guevara LM, Molina-Rodriguez R. Homeostatic model assessment and risk for hypertension during pregnancy: a longitudinal prospective study. *Am J Perinatol*. 2004 Nov;21(8):455-62.

2974. Romundstad PR, Magnussen EB, Smith GD, Vatten LJ. Hypertension in pregnancy and later cardiovascular risk: common antecedents? *Circulation*. 2010 Aug 10;122(6):579-84.

2975. Ronco C, Bonello M, Bordoni V, Ricci Z, D'Intini V, Bellomo R, et al. Extracorporeal therapies in non-renal disease: treatment of sepsis and the peak concentration hypothesis. *Blood purification*. 2004;22(1):164-74.

2976. Ronkainen J, Ala-Houhala M, Autio-Harmainen H, Jahnukainen T, Koskimies O, Merenmies J, et al. Long-term outcome 19 years after childhood IgA nephritis: A retrospective cohort study. *Pediatric Nephrology*. 2006 September;21(9):1266-73.

2977. Roopnarinesingh R, Collins C, McKenna P. Pre-eclampsia affects pulmonary function in pregnancy. *Journal of obstetrics and gynaecology : the journal of the Institute of Obstetrics and Gynaecology*. 2007 Oct;27(7):672-5.

2978. Roos N, Kieler H, Sahlin L, Ekman-Ordeberg G, Falconer H, Stephansson O. Risk of adverse pregnancy outcomes in women with polycystic ovary syndrome: Population based cohort study. *BMJ (Online)*. 2011 22 Oct;343(7828).

2979. Roque H, Paidas MJ, Funai EF, Kuczynski E, Lockwood CJ. Maternal thrombophilias are not associated with early pregnancy loss. *Thromb Haemost*. 2004 Feb;91(2):290-5.

2980. Ros HS, Lichtenstein P, Bellocco R, Petersson G, Cnattingius S. Pulmonary embolism and stroke in relation to pregnancy: how can high-risk women be identified? *Am J Obstet Gynecol*. 2002 Feb;186(2):198-203.

2981. Roseboom TJ, Ravelli ACJ, Van Der Post JA, Painter RC. Maternal characteristics largely explain poor pregnancy outcome after hyperemesis gravidarum. *European Journal of Obstetrics Gynecology and Reproductive Biology*. 2011 May;156(1):56-9.

2982. Rosen T, Sutin K, Carreno CA, Hibbett E, Funai EF. Central hemodynamic monitoring in a woman with acute respiratory insufficiency after evacuation of a complete molar pregnancy: A case report. *Journal of Reproductive Medicine for the Obstetrician and Gynecologist*. 2001;46(10):916-22.

2983. Rosenberg E, Sergienko R, Abu-Ghanem S, Wiznitzer A, Romanowsky I, Neulander EZ, et al. Nephrolithiasis during pregnancy: characteristics, complications, and pregnancy outcome. *World J Urol*. 2011 Dec;29(6):743-7.

2984. Rosenberg TJ, Garbers S, Chavkin W, Chiasson MA. Prepregnancy weight and adverse perinatal

- outcomes in an ethnically diverse population. *Obstet Gynecol.* 2003 Nov;102(5 Pt 1):1022-7.
2985. Rosenberg VA, Buhimschi IA, Lockwood CJ, Paidas MJ, Dulay AT, Ramma W, et al. Heparin elevates circulating soluble fms-like tyrosine kinase-1 immunoreactivity in pregnant women receiving anticoagulation therapy. *Circulation.* 2011 Dec 6;124(23):2543-53.
2986. Rosenblatt J, Loberstajn A, Coulomb A, Stos B, Garel C, Abarah B, et al. Intra-abdominal umbilical vein varix associated with fetal cardiac failure: A pitfall to the prenatal diagnosis of alpha-zero-thalassemia. *Fetal Diagnosis and Therapy.* 2013;34(1):59-62.
2987. Rosier-van Dunne FM, van Wezel-Meijler G, Bakker MP, Odendaal HJ, de Vries JI. Fetal general movements and brain sonography in a population at risk for preterm birth. *Early Hum Dev.* 2010 Feb;86(2):107-11.
2988. Ross JR, Finch C, Ebeling M, Taylor SN. Refeeding syndrome in very-low-birth-weight intrauterine growth-restricted neonates. *Journal of perinatology : official journal of the California Perinatal Association.* 2013 Sep;33(9):717-20.
2989. Roten LT, Fenstad MH, Forsmo S, Johnson MP, Moses EK, Austgulen R, et al. A low COMT activity haplotype is associated with recurrent preeclampsia in a Norwegian population cohort (HUNT2). *Molecular Human Reproduction.* 2011 July;17(7):439-46.
2990. Roth C, Ferbert A. Posterior reversible encephalopathy syndrome: is there a difference between pregnant and non-pregnant patients? *European neurology.* 2009;62(3):142-8.
2991. Rouf S, Siddiqua SF, Mian AH, Begum A. The rising trend for caesarean birth rate in a tertiary referral and teaching hospital. *Bangladesh Journal of Obstetrics and Gynecology.* 2000;15(1):15-23.
2992. Rouse DJ. The Factor V Leiden mutation does not increase the risk of pregnancy-related venous thromboembolism. *Evidence-based Obstetrics and Gynecology.* 2003 March;5(1):56.
2993. Rousseau A, Favier R, Van Dreden P. Elevated circulating soluble thrombomodulin activity, tissue factor activity and circulating procoagulant phospholipids: New and useful markers for pre-eclampsia? *European Journal of Obstetrics Gynecology and Reproductive Biology.* 2009 September;146(1):46-9.
2994. Roy S, Dhobale M, Dangat K, Mehendale S, Wagh G, Lalwani S, et al. Differential levels of long chain polyunsaturated fatty acids in women with preeclampsia delivering male and female babies. *Prostaglandins Leukotrienes and Essential Fatty Acids.* 2014 01 Nov;91(5):227-32.
2995. Roybal JL, Moldenhauer JS, Khalek N, Bebbington MW, Johnson MP, Hedrick HL, et al. Early delivery as an alternative management strategy for selected high-risk fetal sacrococcygeal teratomas. *J Pediatr Surg.* 2011 Jul;46(7):1325-32.
2996. Roy-Matton N, Moutquin JM, Brown C, Carrier N, Bell L. The impact of perceived maternal stress and other psychosocial risk factors on pregnancy complications. *Journal of obstetrics and gynaecology Canada : JOGC = Journal d'obstetrique et gynecologie du Canada : JOGC.* 2011 Apr;33(4):344-52.
2997. Rudra CB, Qiu C, David RM, Bralley JA, Walsh SW, Williams MA. A prospective study of early-pregnancy plasma malondialdehyde concentration and risk of preeclampsia. *Clin Biochem.* 2006 Jul;39(7):722-6.
2998. Rudra CB, Sorensen TK, Luthy DA, Williams MA. A prospective analysis of recreational physical activity and preeclampsia risk. *Med Sci Sports Exerc.* 2008 Sep;40(9):1581-8.
2999. Rudra CB, Williams MA, Frederick IO, Luthy DA. Maternal asthma and risk of preeclampsia: a case-control study. *The Journal of reproductive medicine.* 2006 Feb;51(2):94-100.
3000. Rudra CB, Williams MA, Schiff MA, Koenig JQ, Dills R, Yu J. A prospective study of maternal carboxyhaemoglobin and pre-eclampsia risk. *Paediatric and perinatal epidemiology.* 2010 Jan;24(1):35-44.
3001. Rudra CB, Williams MA, Sheppard L, Koenig JQ, Schiff MA. Ambient carbon monoxide and fine particulate matter in relation to preeclampsia and preterm delivery in western Washington State. *Environ Health Perspect.* 2011 Jun;119(6):886-92.
3002. Rugarn O, Carling Moen S, Berg G. Eclampsia at a tertiary hospital 1973-99. *Acta Obstet Gynecol*

Scand. 2004 Mar;83(3):240-5.

3003. Ruiz-Extremera A, Lopez-Garrido MA, Barranco E, Quintero MD, Ocete-Hita E, Munoz de Rueda P, et al. Activity of hepatic enzymes from week sixteen of pregnancy. *Am J Obstet Gynecol.* 2005 Dec;193(6):2010-6.

3004. Ruma M, Boggess K, Moss K, Jared H, Murtha A, Beck J, et al. Maternal periodontal disease, systemic inflammation, and risk for preeclampsia. *American Journal of Obstetrics and Gynecology.* 2008 April;198(4):389.e1-.e5.

3005. Rumbold AR, Maats FH, Crowther CA. Dietary intake of vitamin C and vitamin E and the development of hypertensive disorders of pregnancy. *European journal of obstetrics, gynecology, and reproductive biology.* 2005 Mar 1;119(1):67-71.

3006. Rupley DM, Janda AM, Kapeles SR, Wilson TM, Berman D, Mathur AK. Preconception counseling, fertility, and pregnancy complications after abdominal organ transplantation: a survey and cohort study of 532 recipients. *Clin Transplant.* 2014 Sep;28(9):937-45.

3007. Rurangirwa AA, Gaillard R, Steegers EA, Hofman A, Jaddoe VW. Hemodynamic adaptations in different trimesters among nulliparous and multiparous pregnant women; the Generation R study. *American journal of hypertension.* 2012 Aug;25(8):892-9.

3008. Rutgers S. Two years maternal mortality in Matebeleland north Province, Zimbabwe. *Cent Afr J Med.* 2001 Feb;47(2):39-43.

3009. Rutherford JM, Moody A, Crawshaw S, Rubin PC. Magnetic resonance spectroscopy in pre-eclampsia: evidence of cerebral ischaemia. *Bjog.* 2003 Apr;110(4):416-23.

3010. Ruys TP, Roos-Hesselink JW, Hall R, Subirana-Domenech MT, Grando-Ting J, Estensen M, et al. Heart failure in pregnant women with cardiac disease: data from the ROPAC. *Heart.* 2014 Feb;100(3):231-8.

3011. Rychel V, Williams KP. Correlation of platelet count changes with liver cell destruction in HELLP syndrome. *Hypertension in pregnancy.* 2003;22(1):57-62.

3012. Rylander A, Lindqvist PG. Eclampsia is more prevalent during the winter season in Sweden. *Acta Obstet Gynecol Scand.* 2011 Jan;90(1):114-7.

3013. Rytlewski K, Huras H, Kusmierska K, Jaworowski A, Gornisiewicz T, Ossowski P, et al. Doppler velocimetry of the materno-fetal circulation in preterm delivered pregnancies complicated with hypertension. *Neuro endocrinology letters.* 2009;30(3):403-8.

3014. Rytlewski K, Huras H, Kusmierska-Urban K, Galas A, Reron A. Leptin and interferon-gamma as possible predictors of cesarean section among women with hypertensive disorders of pregnancy. *Medical Science Monitor.* 2012 August;18(8):CR506-CR11.

3015. Ryu HM, Lim JH, Kim SY, Park SY, Yang JH, Kim MY. Effective prediction of preeclampsia by a combined ratio of angiogenesis-related factors. *Obstetrics and Gynecology.* 2008 June;111(6):1403-9.

3016. Saavedra MA, Sanchez A, Morales S, Navarro-Zarza JE, Angeles U, Jara LJ. Primigravida is associated with flare in women with systemic lupus erythematosus. *Lupus.* 2015 24 Feb;24(2):180-5.

3017. Sabadell J, Casellas M, Alijotas-Reig J, Arellano-Rodrigo E, Cabero L. Inherited antithrombin deficiency and pregnancy: maternal and fetal outcomes. *European journal of obstetrics, gynecology, and reproductive biology.* 2010 Mar;149(1):47-51.

3018. Sachan R, Patel ML, Sachan P, Gaurav A, Singh M, Bansal B. Outcomes in hypertensive disorders of pregnancy in the north indian population. *International Journal of Women's Health.* 2013 05 Mar;5(1):101-8.

3019. Sadow KB, Atabaki SM, Johns CMS, Chamberlain JM, Teach SJ. Biliious emesis in the pediatric emergency department: Etiology and outcome. *Clinical Pediatrics.* 2002 September;41(7):475-9.

3020. Saeed F, Jawad A, Azmat A, Azam I, Kagazwala S. Anthropometric measurements as a risk for hypertensive disorders in pregnancy: a hospital based study in South Asian population. *JPMA The Journal of the Pakistan Medical Association.* 2011 Jan;61(1):58-63.

3021. Saereporncharenkul K. Correlation of BMI to pregnancy outcomes in Thai women delivered in Rajavithi Hospital. *Journal of the Medical Association of Thailand = Chotmai het thangphaet*. 2011 Mar;94 Suppl 2:S52-8.
3022. Safirstein JG, Ro AS, Grandhi S, Wang L, Fett JD, Staniloae C. Predictors of left ventricular recovery in a cohort of peripartum cardiomyopathy patients recruited via the internet. *International Journal of Cardiology*. 2012 12 Jan;154(1):27-31.
3023. Saftlas AF, Levine RJ, Klebanoff MA, Martz KL, Ewell MG, Morris CD, et al. Abortion, changed paternity, and risk of preeclampsia in nulliparous women. *American journal of epidemiology*. 2003 15 Jun;157(12):1108-14.
3024. Saftlas AF, Triche EW, Beydoun H, Bracken MB. Does chocolate intake during pregnancy reduce the risks of preeclampsia and gestational hypertension? *Annals of epidemiology*. 2010 Aug;20(8):584-91.
3025. Sagsoz N, Kucukozkan T. The effect of treatment on endothelin-1 concentration and mean arterial pressure in preeclampsia and eclampsia. *Hypertension in pregnancy*. 2003;22(2):185-91.
3026. Saha S, Das R, Chakraborty M, Bala HS, Naskar P. A paradigm shift to check the increasing trend of cesarean delivery is the need of hour: But how? *Journal of Obstetrics and Gynecology of India*. 2012 August;62(4):391-7.
3027. Saha SP, Bhattacharjee N, Ganguli RP, Sil S, Patra KK, Sengupta M, et al. Prevalence and significance of antiphospholipid antibodies in selected at-risk obstetrics cases: a comparative prospective study. *Journal of obstetrics and gynaecology : the journal of the Institute of Obstetrics and Gynaecology*. 2009 Oct;29(7):614-8.
3028. Sahay AS, Patil VV, Sundrani DP, Joshi AA, Wagh GN, Gupte SA, et al. A longitudinal study of circulating angiogenic and antiangiogenic factors and AT1-AA levels in preeclampsia. *Hypertension research : official journal of the Japanese Society of Hypertension*. 2014 Aug;37(8):753-8.
3029. Sahu MT, Agarwal A, Das V, Pandey A. Impact of maternal body mass index on obstetric outcome. *The journal of obstetrics and gynaecology research*. 2007 Oct;33(5):655-9.
3030. Said JM, Higgins JR, Moses EK, Walker SP, Borg AJ, Monagle PT, et al. Inherited thrombophilia polymorphisms and pregnancy outcomes in nulliparous women. *Obstet Gynecol*. 2010 Jan;115(1):5-13.
3031. Said JM, Higgins JR, Moses EK, Walker SP, Monagle PT, Brennecke SP. Inherited thrombophilias and adverse pregnancy outcomes: a case-control study in an Australian population. *Acta Obstet Gynecol Scand*. 2012 Feb;91(2):250-5.
3032. Said JM, Tsui R, Borg AJ, Higgins JR, Moses EK, Walker SP, et al. The PAI-1 4G/5G polymorphism is not associated with an increased risk of adverse pregnancy outcome in asymptomatic nulliparous women. *Journal of thrombosis and haemostasis : JTH*. 2012 May;10(5):881-6.
3033. Said L, Faleh R, Smida S, Laajili H, Sakouhi M, Bel Hadj Jrad B. Maternal tumor necrosis factor receptor 2 gene variants associated with pre-eclampsia in Tunisian women. *The journal of obstetrics and gynaecology research*. 2013 Aug;39(8):1301-7.
3034. Saikul S, Wiriyasirivaj B, Charoenchinont P. First 4-hour urinary protein - creatinine ratio for diagnosis of significant proteinuria in preeclampsia. *Journal of the Medical Association of Thailand = Chotmai het thangphaet*. 2006 Oct;89 Suppl 4:S42-6.
3035. Sajith M, Nimbargi V, Modi A, Sumariya R, Pawar A. A study on incidence and management of preeclampsia in a tertiary care hospital. *Indian Journal of Pharmaceutical Education and Research*. 2014 April-June;48(2):70-6.
3036. Sak ME, Evsen MS, Soydinc HE, Turgut A, Ozler A, Sak S, et al. Risk factors for maternal mortality in eclampsia: analysis of 167 eclamptic cases. *Eur Rev Med Pharmacol Sci*. 2012 Oct;16(10):1399-403.
3037. Sak ME, Turgut A, Evsen MS, Soydinc HE, Ozler A, Sak S, et al. Relaparotomy after initial surgery in obstetric and gynecologic operations: analysis of 113 cases. *Ginekol Pol*. 2012 Jun;83(6):429-32.
3038. Saki F, Dabbaghmanesh MH, Ghaemi SZ, Forouhari S, Omrani GR, Bakhshayeshkaram M. Thyroid function in pregnancy and its influences on maternal and fetal outcomes. *International Journal of*

Endocrinology and Metabolism. 2014;12(4).

3039. Salahuddin S, Lee Y, Vadnais M, Sachs BP, Karumanchi SA, Lim KH. Diagnostic utility of soluble fms-like tyrosine kinase 1 and soluble endoglin in hypertensive diseases of pregnancy. *American Journal of Obstetrics and Gynecology*. 2007 July;197(1):28.e1-.e6.

3040. Salako BL, Olayemi O, Odukogbe ATA, Adedapo KS, Aimakhu CO, Alu FE, et al. Microalbuminuria in pregnancy as a predictor of preeclampsia and eclampsia. *West African Journal of Medicine*. 2003 December;22(4):295-300.

3041. Salamat SM, Landy HJ, O'Sullivan MJ. Labor induction after fetal death. A retrospective analysis. *The Journal of reproductive medicine*. 2002 Jan;47(1):23-6.

3042. Saleem S, McClure EM, Goudar SS, Patel A, Esamai F, Garces A, et al. A prospective study of maternal, fetal and neonatal deaths in low- and middle-income countries  
Une etude prospective de la mortalite maternelle, foetale et neonatale dans les pays a revenus faible et intermediaire. *Bulletin of the World Health Organization*. 2014 August;92(8):605-12.

3043. Saleemuddin A, Tantbirojn P, Sirois K, Crum CP, Boyd TK, Tworoger S, et al. Obstetric and perinatal complications in placentas with fetal thrombotic vasculopathy. *Pediatric and Developmental Pathology*. 2010 November;13(6):459-64.

3044. Salem M, Kamal S, El Sherbiny W, Abdel Aal AA. Flow cytometric assessment of endothelial and platelet microparticles in preeclampsia and their relation to disease severity and doppler parameters. *Hematology*. 2015;20(3):154-9.

3045. Salem Yaniv S, Levy A, Wiznitzer A, Holberg G, Mazor M, Sheiner E. A significant linear association exists between advanced maternal age and adverse perinatal outcome. *Archives of Gynecology and Obstetrics*. 2011 April;283(4):755-9.

3046. Salihu HM, Aliyu MH, Sedjro JE, Nabukera S, Oluwatade OJ, Alexander GR. Teen twin pregnancies: Differences in fetal growth outcomes among blacks and whites. *American Journal of Perinatology*. 2005 August;22(6):335-9.

3047. Salihu HM, Bowen CM, Wilson RE, Marty PJ. The impact of previous cesarean section on the success of future fetal programming pattern. *Archives of Gynecology and Obstetrics*. 2011 August;284(2):319-26.

3048. Salihu HM, Luke S, Alio AP, Wathington D, Mbah AK, Marty PJ, et al. The superobese mother and ethnic disparities in preterm birth. *Journal of the National Medical Association*. 2009 November;101(11):1125-31.

3049. Salihu HM, Mogos MF, August EM, Dejoy S, De La Cruz C, Alio AP, et al. HIV infection and its impact on fetal outcomes among women of advanced maternal age: A propensity score weighted matching approach. *AIDS Research and Human Retroviruses*. 2013 01 Mar;29(3):581-7.

3050. Salihu HM, Tchuinguem G, Aliyu MH, Kouam L. Prune belly syndrome and associated malformations. A 13-year experience from a developing country. *West Indian Med J*. 2003 Dec;52(4):281-4.

3051. Salihu HM, Weldeselasse HE, Rao K, Marty PJ, Whiteman VE. The impact of obesity on maternal morbidity and feto-infant outcomes among macrosomic infants. *The journal of maternal-fetal & neonatal medicine : the official journal of the European Association of Perinatal Medicine, the Federation of Asia and Oceania Perinatal Societies, the International Society of Perinatal Obstet*. 2011 Sep;24(9):1088-94.

3052. Salim R, Czarnowicki T, Nachum Z, Shalev E. The impact of close surveillance on pregnancy outcome among women with a prior history of antepartum complications attributed to thrombosis: a cohort study. *Reproductive biology and endocrinology : RB&E*. 2008;6:55.

3053. Salim R, Mfra A, Garmi G, Shalev E. Comparison of intrapartum outcome among immigrant women from Ethiopia and the general obstetric population in Israel. *International journal of gynaecology and obstetrics: the official organ of the International Federation of Gynaecology and*



Obstetrics. 2012 Aug;118(2):161-5.

3054. Salimi S, Mokhtari M, Yaghmaei M, Jamshidi M, Naghavi A. Association of angiotensin-converting enzyme intron 16 insertion/deletion and angiotensin II type 1 receptor A1166C gene polymorphisms with preeclampsia in South East of Iran. *Journal of biomedicine & biotechnology*. 2011;2011:941515.

3055. Salmoirago-Blotcher E, Reddy S, Swales H, Wittstein I, Ockene I, Aurigemma G, et al. Post-discharge prognosis of stress cardiomyopathy in women: A retrospective cohort study. *IJC Metabolic and Endocrine*. 2014 01 Sep;4:23-7.

3056. Salmon JE, Heuser C, Triebwasser M, Liszewski MK, Kavanagh D, Roumenina L, et al. Mutations in complement regulatory proteins predispose to preeclampsia: a genetic analysis of the PROMISSE cohort. *PLoS Med*. 2011 Mar;8(3):e1001013.

3057. Salomon LJ, Benattar C, Audibert F, Fernandez H, Duyme M, Taieb J, et al. Severe preeclampsia is associated with high inhibin A levels and normal leptin levels at 7 to 13 weeks into pregnancy. *Am J Obstet Gynecol*. 2003 Dec;189(6):1517-22.

3058. Salomon LJ, Hourrier S, Fanchin R, Ville Y, Rozenberg P. Is first-trimester crown-rump length associated with birthweight? *BJOG: An International Journal of Obstetrics and Gynaecology*. 2011 September;118(10):1223-8.

3059. Salomon O, Seligsohn U, Steinberg DM, Zalel Y, Lerner A, Rosenberg N, et al. The common prothrombotic factors in nulliparous women do not compromise blood flow in the fetomaternal circulation and are not associated with preeclampsia or intrauterine growth restriction. *Am J Obstet Gynecol*. 2004 Dec;191(6):2002-9.

3060. Salonen Ros H, Lichtenstein P, Lipworth L, Cnattingius S. Genetic effects on the liability of developing pre-eclampsia and gestational hypertension. *Am J Med Genet*. 2000 Apr 10;91(4):256-60.

3061. Salvador-Moysen J, Ramirez-Aranda JM, Martinez-Lopez Y, Aguilar-Duran M. Salivary cortisol levels as a predictor of preeclampsia in adolescents  
Niveles de cortisol salivario como predictor de preeclampsia en adolescentes. *Colombia Medica*. 2012 January-March;43(1):46-53.

3062. Sameshima H, Kodama Y, Ikenoue T, Kajiwara Y. Antithrombin improves fetal condition in women with severe pre-eclampsia before 32 weeks of gestation; a randomized, double-blind, placebo-controlled trial. *The journal of obstetrics and gynaecology research*. 2008 Feb;34(1):34-9.

3063. Sammar M, Nisamblatt S, Gonen R, Huppertz B, Gizurarson S, Osol G, et al. The role of the carbohydrate recognition domain of Placental Protein 13 (PP13) in pregnancy evaluated with recombinant PP13 and the DelT221 PP13 Variant. *PloS one*. 2014 31 Jul;9(7).

3064. Samolis S, Papastefanou I, Panagopoulos P, Galazios G, Kouskoukis A, Maroulis G. Relation between first trimester maternal serum leptin levels and body mass index in normotensive and pre-eclamptic pregnancies--role of leptin as a marker of pre-eclampsia: a prospective case-control study. *Gynecological endocrinology : the official journal of the International Society of Gynecological Endocrinology*. 2010 May;26(5):338-43.

3065. Samolis S, Papastefanou I, Panagopoulos P, Galazios G, Kouskoukis A, Maroulis G. Relation between first trimester maternal serum leptin levels and body mass index in normotensive and pre-eclamptic pregnancies Role of leptin as a marker of pre-eclampsia: A prospective casecontrol study. *Gynecological Endocrinology*. 2010 May;26(5):338-43.

3066. Sampson M, Archibong AE, Powell A, Strange B, Roberson S, Hills ER, et al. Perturbation of the developmental potential of preimplantation mouse embryos by hydroxyurea. *International Journal of Environmental Research and Public Health*. 2010 May;7(5):2033-44.

3067. Samuel A, Lin C, Parviainen K, Jeyabalan A. Expectant management of preeclampsia superimposed on chronic hypertension. *The journal of maternal-fetal & neonatal medicine : the official journal of the European Association of Perinatal Medicine, the Federation of Asia and Oceania Perinatal*

- Societies, the International Society of Perinatal Obstet. 2011 Jul;24(7):907-11.
3068. Sances G, Granella F, Nappi RE, Fignon A, Ghiotto N, Polatti F, et al. Course of migraine during pregnancy and postpartum: A prospective study. *Cephalalgia*. 2003 April;23(3):197-205.
3069. Sanchez O, Llubra E, Marsal G, Dominguez C, Aulesa C, Sanchez-Duran MA, et al. First trimester serum angiogenic/anti-angiogenic status in twin pregnancies: relationship with assisted reproduction technology. *Human reproduction*. 2012 Feb;27(2):358-65.
3070. Sanchez SE, Qiu C, Williams MA, Lam N, Sorensen TK. Headaches and migraines are associated with an increased risk of preeclampsia in Peruvian women. *American journal of hypertension*. 2008 March;21(3):360-4.
3071. Sanchez-Manubens J, Ortiz-Santamaria V, Coll Sibina MT, Cuquet J, Bermudez JR, Suris X, et al. Newborns whose mother has autoimmune disease. A community hospitals' experience. *Reumatologia clinica*. 2013 May-Jun;9(3):161-5.
3072. Sandvik MK, Hallan S, Svarstad E, Vikse BE. Preeclampsia and prevalence of microalbuminuria 10 years later. *Clinical Journal of the American Society of Nephrology*. 2013 July;8(7):1126-34.
3073. Sandvik MK, Iversen BM, Irgens LM, Skjaerven R, Leivestad T, Softeland E, et al. Are adverse pregnancy outcomes risk factors for development of end-stage renal disease in women with diabetes? *Nephrology, dialysis, transplantation : official publication of the European Dialysis and Transplant Association - European Renal Association*. 2010 Nov;25(11):3600-7.
3074. Sandvik MK, Leirgul E, Nygard O, Ueland PM, Berg A, Svarstad E, et al. Preeclampsia in healthy women and endothelial dysfunction 10 years later. *Am J Obstet Gynecol*. 2013 Dec;209(6):569.e1-.e10.
3075. Sangle S, D'Cruz DP, Hughes GR. Livedo reticularis and pregnancy morbidity in patients negative for antiphospholipid antibodies. *Ann Rheum Dis*. 2005 Jan;64(1):147-8.
3076. Santin S, Ars E, Rossetti S, Salido E, Silva I, Garcia-Maset R, et al. TRPC6 mutational analysis in a large cohort of patients with focal segmental glomerulosclerosis. *Nephrology Dialysis Transplantation*. 2009 October;24(10):3089-96.
3077. Santini-Oliveira M, Friedman RK, Veloso VG, Cunha CB, Pilotto JH, Marins LMS, et al. Incidence of antiretroviral adverse drug reactions in pregnant women in two referral centers for HIV prevention of mother-to-child-transmission care and research in Rio de Janeiro, Brazil. *Brazilian Journal of Infectious Diseases*. 2014;18(4):372-8.
3078. Santjohanser C, Knieper C, Franz C, Hirv K, Meri O, Schleyer M, et al. Granulocyte-colony stimulating factor as treatment option in patients with recurrent miscarriage. *Archivum Immunologiae et Therapiae Experimentalis*. 2013 April;61(2):159-64.
3079. Santoro R, Lannaccaro P, Prejano S, Muleo G. Efficacy and safety of the long-term administration of low-molecular-weight heparins in pregnancy. *Blood Coagulation and Fibrinolysis*. 2009 June;20(4):240-3.
3080. Santos EMF, de Amorim LP, Costa OLN, Oliveira N, Guimaraes AC. Profile of gestational and metabolic risk in the prenatal care service of a public maternity in the Brazilian Northeast Perfil de risco gestacional e metabolico no servico de pre-natal de maternidade publica do nordeste do Brasil. *Revista Brasileira de Ginecologia e Obstetricia*. 2012 March;34(3):102-6.
3081. Sarmiento A, Casasbuenas A, Rodriguez N, Angarita AM, Sarmiento P, Sepulveda W. First-trimester uterine artery Doppler velocimetry in the prediction of birth weight in a low-risk population. *Prenatal diagnosis*. 2013 January;33(1):21-4.
3082. Sarojini A, Sai Ravi Shanker A, Anitha M. Inflammatory markers-serum level of c-reactive protein, tumor necrotic factor-alpha, and interleukin-6 as predictors of outcome for peripartum cardiomyopathy. *Journal of Obstetrics and Gynecology of India*. 2013 August;63(4):234-9.
3083. Saruhan Z, Ozekinci M, Simsek M, Mendilcioglu I. Association of first trimester low PAPP-A levels with adverse pregnancy outcomes. *Clinical and experimental obstetrics & gynecology*. 2012;39(2):225-8.
3084. Sasidharan CK, Gokul E, Sabitha S. Incidence and risk factors for neonatal hypoglycaemia in

Kerala, India. *Ceylon Med J.* 2004 Dec;49(4):110-3.

3085. Sato M, Aotani H, Hattori R, Funato M. Behavioral outcome including attention deficit hyperactivity disorder/hyperactivity disorder and minor neurological signs in perinatal high-risk newborns at 4-6 years of age with relation to risk factors. *Pediatrics international : official journal of the Japan Pediatric Society.* 2004 Jun;46(3):346-52.

3086. Sattar N, Clark P, Greer IA, Shepherd J, Packard CJ. Lipoprotein (a) levels in normal pregnancy and in pregnancy complicated with pre-eclampsia. *Atherosclerosis.* 2000 01 Feb;148(2):407-11.

3087. Sattar N, Clark P, Holmes A, Lean MEJ, Walker I, Greer IA. Antenatal waist circumference and hypertension risk. *Obstetrics and Gynecology.* 2001;97(2):268-71.

3088. Sattar N, Ramsay J, Crawford L, Cheyne H, Greer IA. Classic and novel risk factor parameters in women with a history of preeclampsia. *Hypertension.* 2003 Jul;42(1):39-42.

3089. Sauermann R, Marsik C, Steiner I, Seir K, Cvitko T, Zeitlinger M, et al. Immunomodulatory effects of fosfomycin in experimental human endotoxemia. *Antimicrobial agents and chemotherapy.* 2007 May;51(5):1879-81.

3090. Saunders L, Kadhel P, Costet N, Rouget F, Monfort C, Thome JP, et al. Hypertensive disorders of pregnancy and gestational diabetes mellitus among French Caribbean women chronically exposed to chlordecone. *Environ Int.* 2014 Jul;68:171-6.

3091. Savitz DA, Danilack VA, Elston B, Lipkind HS. Pregnancy-induced hypertension and diabetes and the risk of cardiovascular disease, stroke, and diabetes hospitalization in the year following delivery. *American journal of epidemiology.* 2014 01 Jul;180(1):41-4.

3092. Savitz DA, Danilack VA, Engel SM, Elston B, Lipkind HS. Descriptive epidemiology of chronic hypertension, gestational hypertension, and preeclampsia in New York State, 1995-2004. *Matern Child Health J.* 2014 May;18(4):829-38.

3093. Savitz DA, Klebanoff MA, Wellenius GA, Jensen ET, Longnecker MP. Persistent organochlorines and hypertensive disorders of pregnancy. *Environ Res.* 2014 Jul;132:1-5.

3094. Savvidou MD, Sotiriadis A, Kaihura C, Nicolaidis KH, Sattar N. Circulating levels of adiponectin and leptin at 23-25 weeks of pregnancy in women with impaired placentation and in those with established fetal growth restriction. *Clinical science (London, England : 1979).* 2008 Oct;115(7):219-24.

3095. Sawhney H, Aggarwal N, Biswas R, Vasishtha K, Gopalan S. Maternal mortality associated with eclampsia and severe preeclampsia of pregnancy. *The journal of obstetrics and gynaecology research.* 2000 Oct;26(5):351-6.

3096. Sawlani KK, Chaudhary SC, Roy A, Tripathi AK. Factor XIII deficiency presenting with intracerebral bleed. *BMJ Case Reports.* 2013(63).

3097. Saxena AR, Seely EW, Rich-Edwards JW, Wilkins-Haug LE, Karumanchi SA, McElrath TF. First trimester PAPP-A levels correlate with sFlt-1 levels longitudinally in pregnant women with and without preeclampsia. *BMC pregnancy and childbirth.* 2013 04 Apr;13(85).

3098. Sayin N, Kara N, Pirhan D, Vural A, Araz Ersan HB, Tekirdag AI, et al. Subfoveal choroidal thickness in preeclampsia: comparison with normal pregnant and nonpregnant women. *Seminars in ophthalmology.* 2014 Jan;29(1):11-7.

3099. Sayin NC, Canda MT, Ahmet N, Arda S, Sut N, Varol FG. The association of triple-marker test results with adverse pregnancy outcomes in low-risk pregnancies with healthy newborns. *Arch Gynecol Obstet.* 2008 Jan;277(1):47-53.

3100. Sayyed T, Kandil M, Bashir O, Alnaser H. The relationship between term pre-eclampsia and the risk of early childhood caries. *The journal of maternal-fetal & neonatal medicine : the official journal of the European Association of Perinatal Medicine, the Federation of Asia and Oceania Perinatal Societies, the International Society of Perinatal Obstet.* 2014 Jan;27(1):62-5.

3101. Scuzzocchio E, Figueras F. Contemporary prediction of preeclampsia. *Current Opinion in Obstetrics and Gynecology.* 2011 April;23(2):65-71.

3102. Scuzzocchio E, Figueras F, Crispi F, Meler E, Masoller N, Mula R, et al. Performance of a first-trimester screening of preeclampsia in a routine care low-risk setting. *Am J Obstet Gynecol.* 2013 Mar;208(3):203.e1- .e10.
3103. Scuzzochio E, Munmany M, Garcia L, Meler E, Crispi F, Gratacos E, et al. Prognostic role of maternal neutrophil gelatinase-associated lipocalin in women with severe early-onset preeclampsia. *Fetal Diagnosis and Therapy.* 2014 February;35(2):127-32.
3104. Schaaf JM, Bruinse HW, van der Leeuw-Harmsen L, Groeneveld E, Koopman C, Franx A, et al. Reproductive outcome after early-onset pre-eclampsia. *Human reproduction.* 2011 Feb;26(2):391-7.
3105. Schaafstra L, van Roon EN, Morssink LP, de Vries NK. The effect of maternal ketanserin use on the circulation of the neonate: a prospective, observational study. *European journal of obstetrics, gynecology, and reproductive biology.* 2012 May;162(1):11-5.
3106. Schaap TP, Knight M, Zwart JJ, Kurinczuk JJ, Brocklehurst P, van Roosmalen J, et al. Eclampsia, a comparison within the International Network of Obstetric Survey Systems. *Bjog.* 2014 Nov;121(12):1521-8.
3107. Scharte M, Nofer JR, Van Aken H, Waurick R, Meyer J, Bone HG. Nicotinamide increases systemic vascular resistance in ovine endotoxemia. *Intensive care medicine.* 2003 Jun;29(6):989-94.
3108. Schatz M, Dombrowski MP, Wise R, Momirova V, Landon M, Mabie W, et al. The relationship of asthma medication use to perinatal outcomes. *The Journal of allergy and clinical immunology.* 2004 Jun;113(6):1040-5.
3109. Schatz M, Dombrowski MP, Wise R, Momirova V, Landon M, Mabie W, et al. Spirometry is related to perinatal outcomes in pregnant women with asthma. *American Journal of Obstetrics and Gynecology.* 2006 January;194(1):120-6.
3110. Schauf B, Becker S, Abele H, Klever T, Wallwiener D, Aydeniz B. Effect of magnesium on red blood cell deformability in pregnancy. *Hypertension in pregnancy.* 2005;24(1):17-27.
3111. Schauf B, Lang U, Stute P, Schneider S, Dietz K, Aydeniz B, et al. Reduced red blood cell deformability, an indicator for high fetal or maternal risk, is found in preeclampsia and IUGR. *Hypertension in pregnancy.* 2002;21(2):147-60.
3112. Schausberger CE, Jacobs VR, Bogner G, Wolfrum-Ristau P, Fischer T. Hypertensive Disorders of Pregnancy - A Life-Long Risk?! *Geburtshilfe und Frauenheilkunde.* 2013;73(1):47-52.
3113. Schettini F, Jr., Laforgia N, Altomare M, Mautone A, Del Vecchio GC. Plasma protein Z levels in healthy and high-risk newborn infants. *Acta paediatrica (Oslo, Norway : 1992).* 2004 May;93(5):654-7.
3114. Scheuchenegger A, Lechner E, Wiesinger-Eidenberger G, Weissensteiner M, Wagner O, Schimetta W, et al. Short-term morbidities in moderate and late preterm infants. *Klin Padiatr.* 2014 Jul;226(4):216-20.
3115. Schiessl B, Kainer F, Oberhoffer R, Jundt K, Friese K. Doppler sonography of the uterine and the cubital arteries in normal pregnancies, preeclampsia and intrauterine growth restriction: evidence for a systemic vessel involvement. *J Perinat Med.* 2006;34(2):139-44.
3116. Schietroma M, Pessia B, Carlei F, Cecilia EM, Amicucci G. Intestinal permeability, systemic endotoxemia, and bacterial translocation after open or laparoscopic resection for colon cancer: a prospective randomized study. *International journal of colorectal disease.* 2013 Dec;28(12):1651-60.
3117. Schietroma M, Piccione F, Carlei F, Sista F, Cecilia EM, Amicucci G. Peritonitis from perforated peptic ulcer and immune response. *Journal of investigative surgery : the official journal of the Academy of Surgical Research.* 2013 Oct;26(5):294-304.
3118. Schiffrin EJ, Parlesak A, Bode C, Bode JC, van't Hof MA, Grathwohl D, et al. Probiotic yogurt in the elderly with intestinal bacterial overgrowth: endotoxaemia and innate immune functions. *The British journal of nutrition.* 2009 Apr;101(7):961-6.
3119. Schipper EJ, Bolte AC, Schalkwijk CG, Van Geijn HP, Dekker GA. TNF-receptor levels in preeclampsia--results of a longitudinal study in high-risk women. *The journal of maternal-fetal &*

neonatal medicine : the official journal of the European Association of Perinatal Medicine, the Federation of Asia and Oceania Perinatal Societies, the International Society of Perinatal Obstet. 2005 Nov;18(5):283-7.

3120. Schipper EJJ, Bolte AC, Schalkwijk CG, Van Geijn HP, Dekker GA. TNF-receptor levels in preeclampsia - Results of a longitudinal study in high-risk women. *Journal of Maternal-Fetal and Neonatal Medicine*. 2005 November;18(5):283-7.

3121. Schleussner E, Lehmann T, Kahler C, Schneider U, Schlembach D, Groten T. Impact of the nitric oxide-donor pentaerythrityl-tetranitrate on perinatal outcome in risk pregnancies: a prospective, randomized, double-blinded trial. *J Perinat Med*. 2014 Jul;42(4):507-14.

3122. Schleussner E, Lehmann T, Kahler C, Schneider U, Schlembach D, Groten T. Impact of the nitric oxide-donor pentaerythrityltetranitrate on perinatal outcome in risk pregnancies: A prospective, randomized, double-blinded trial. *Journal of Perinatal Medicine*. 2014 July;42(4):507-14.

3123. Schmidt K, Zimmerman A, Bauman M, Ferrone C, Venter J, Spybrook J, et al. Brief report: Asperger's syndrome and sibling birth order. *Journal of Autism and Developmental Disorders*. 2013 April;43(4):973-7.

3124. Schmidt M, Dogan C, Birdir C, Callies R, Kuhn U, Gellhaus A, et al. Altered angiogenesis in preeclampsia: Evaluation of a new test system for measuring placental growth factor. *Clinical Chemistry and Laboratory Medicine*. 2007 11 Nov;45(11):1504-10.

3125. Schmidt MI, Duncan BB, Reichelt AJ, Branchtein L, Matos MC, Costa e Forti A, et al. Gestational diabetes mellitus diagnosed with a 2-h 75-g oral glucose tolerance test and adverse pregnancy outcomes. *Diabetes Care*. 2001 Jul;24(7):1151-5.

3126. Schmiegelow C, Minja D, Oesterholt M, Pehrson C, Suhrs HE, Bostrom S, et al. Factors associated with and causes of perinatal mortality in northeastern Tanzania. *Acta Obstet Gynecol Scand*. 2012 Sep;91(9):1061-8.

3127. Schneider S, Freerksen N, Maul H, Roehrig S, Fischer B, Hoeft B. Risk groups and maternal-neonatal complications of preeclampsia - Current results from the national German Perinatal Quality Registry. *Journal of Perinatal Medicine*. 2011 May;39(3):257-63.

3128. Schneider S, Freerksen N, Rohrig S, Hoeft B, Maul H. Gestational diabetes and preeclampsia - Similar risk factor profiles? *Early Human Development*. 2012 March;88(3):179-84.

3129. Schnettler WT, Dukhovny D, Wenger J, Salahuddin S, Ralston SJ, Rana S. Cost and resource implications with serum angiogenic factor estimation in the triage of pre-eclampsia. *Bjog*. 2013 Sep;120(10):1224-32.

3130. Schneuer FJ, Nassar N, Guilbert C, Tasevski V, Ashton AW, Morris JM, et al. First trimester screening of serum soluble fms-like tyrosine kinase-1 and placental growth factor predicting hypertensive disorders of pregnancy. *Pregnancy Hypertension*. 2013 October;3(4):215-21.

3131. Schneuer FJ, Nassar N, Khambalia AZ, Tasevski V, Ashton AW, Morris JM, et al. First trimester screening of maternal placental protein 13 for predicting preeclampsia and small for gestational age: In-house study and systematic review. *Placenta*. 2012 September;33(9):735-40.

3132. Schneuer FJ, Nassar N, Tasevski V, Morris JM, Roberts CL. Association and predictive accuracy of high TSH serum levels in first trimester and adverse pregnancy outcomes. *The Journal of clinical endocrinology and metabolism*. 2012 Sep;97(9):3115-22.

3133. Schneuer FJ, Roberts CL, Ashton AW, Guilbert C, Tasevski V, Morris JM, et al. Angiopoietin 1 and 2 serum concentrations in first trimester of pregnancy as biomarkers of adverse pregnancy outcomes. *Am J Obstet Gynecol*. 2014 Apr;210(4):345.e1-9.

3134. Schoenaker DAJM, Soedamah-Muthu SS, Mishra GD. The association between dietary factors and gestational hypertension and pre-eclampsia: A systematic review and meta-analysis of observational studies. *BMC Medicine*. 2014 September 22;12(1).

3135. Scholl TO, Chen X, Goldberg GS, Khusial PR, Stein TP. Maternal diet, C-reactive protein, and the

- outcome of pregnancy. *J Am Coll Nutr.* 2011 Aug;30(4):233-40.
3136. Scholl TO, Chen X, Peter Stein T. Vitamin D, secondary hyperparathyroidism, and preeclampsia. *American Journal of Clinical Nutrition.* 2013 01 Sep;98(3):787-93.
3137. Scholl TO, Chen X, Stein TP. Maternal calcium metabolic stress and fetal growth. *The American journal of clinical nutrition.* 2014 Apr;99(4):918-25.
3138. Scholl TO, Leskiw M, Chen X, Sims M, Stein TP. Oxidative stress, diet, and the etiology of preeclampsia. *The American journal of clinical nutrition.* 2005 Jun;81(6):1390-6.
3139. Scholten RR, Hopman MT, Sweep FC, Van de Vlugt MJ, Van Dijk AP, Oyen WJ, et al. Co-occurrence of cardiovascular and prothrombotic risk factors in women with a history of preeclampsia. *Obstet Gynecol.* 2013 Jan;121(1):97-105.
3140. Scholten RR, Sep S, Peeters L, Hopman MT, Lotgering FK, Spaanderman ME. Prepregnancy low-plasma volume and predisposition to preeclampsia and fetal growth restriction. *Obstet Gynecol.* 2011 May;117(5):1085-93.
3141. Scholten RR, Thijssen DJH, Lotgering FK, Hopman MTE, Spaanderman MEA. Cardiovascular effects of aerobic exercise training in formerly preeclamptic women and healthy parous control subjects. *American Journal of Obstetrics and Gynecology.* 2014 01 Nov;211(5):516.e1-.e11.
3142. Schoofs K, Grittner U, Engels T, Pape J, Denk B, Henrich W, et al. The importance of repeated measurements of the sFlt-1/PIGF ratio for the prediction of preeclampsia and intrauterine growth restriction. *J Perinat Med.* 2014 Jan;42(1):61-8.
3143. Schoorel ENC, Van Kuijk SMJ, Melman S, Nijhuis JG, Smits LJM, Aardenburg R, et al. Vaginal birth after a caesarean section: The development of a Western European population-based prediction model for deliveries at term. *BJOG: An International Journal of Obstetrics and Gynaecology.* 2014 January;121(2):194-201.
3144. Schrale RG, Ormerod J, Ormerod OJM. Percutaneous device closure of the patent foramen ovale during pregnancy. *Catheterization and Cardiovascular Interventions.* 2007 01 Mar;69(4):579-83.
3145. Schrauwers C, Dekker G. Maternal and perinatal outcome in obese pregnant patients. *Journal of Maternal-Fetal and Neonatal Medicine.* 2009;22(3):218-26.
3146. Schreinemakers JM, Zonnenberg BA, Hoppener JW, Hes FJ, Rinkes IH, Lips CJ. A patient with bilateral pheochromocytoma as part of a Von Hippel-Lindau (VHL) syndrome type 2C. *World journal of surgical oncology.* 2007;5:112.
3147. Schrey S, Kingdom J, Baczyk D, Fitzgerald B, Keating S, Ryan G, et al. Leptin is differentially expressed and epigenetically regulated across monozygotic twin placenta with discordant fetal growth. *Molecular Human Reproduction.* 2013 November;19(11):764-72.
3148. Schummers L, Hutcheon JA, Bodnar LM, Lieberman E, Himes KP. Risk of adverse pregnancy outcomes by prepregnancy body mass index: a population-based study to inform prepregnancy weight loss counseling. *Obstet Gynecol.* 2015 Jan;125(1):133-43.
3149. Schwartz N, Pessel C, Coletta J, Krieger AM, Timor-Tritsch IE. Early biometric lag in the prediction of small for gestational age neonates and preeclampsia. *J Ultrasound Med.* 2011 Jan;30(1):55-60.
3150. Schwartz RB, Feske SK, Polak JF, DeGirolami U, Iaia A, Beckner KM, et al. Preeclampsia-eclampsia: clinical and neuroradiographic correlates and insights into the pathogenesis of hypertensive encephalopathy. *Radiology.* 2000 Nov;217(2):371-6.
3151. Schwartzenburg CJ, Gilmandyar D, Thornburg LL, Hackney DN. Pregnancy outcomes of women with failure to retain rubella immunity. *Journal of Maternal-Fetal and Neonatal Medicine.* 2014 01 Dec;27(18):1845-8.
3152. Schwarz GL, Volmanen P, Albrechtsen S, Bjoernestad E. Remifentanyl target-controlled infusion during second stage labour in high-risk parturients: A case series. *Acta Anaesthesiologica Scandinavica.* 2013 July;57(6):802-8.
3153. Schwarze A, Nelles I, Krapp M, Friedrich M, Schmidt W, Diedrich K, et al. Doppler ultrasound of

- the uterine artery in the prediction of severe complications during low-risk pregnancies. *Arch Gynecol Obstet.* 2005 Jan;271(1):46-52.
3154. Scifres C, Houser M, Nicholas S, Czarnecki D, Masoudi S, Norman S. Discussion: 'Inherited thrombophilia and preeclampsia' by Kahn et al. *American Journal of Obstetrics and Gynecology.* 2009 February;200(2):e1-e5.
3155. Scifres C, Houser M, Nicholas S, Czarnecki D, Masoudi S, Norman S. Inherited thrombophilia and preeclampsia: Kahn et al. *American Journal of Obstetrics and Gynecology.* 2009 February;200(2):212-3.
3156. Scifres CM, Catov JM, Simhan H. Maternal serum fatty acid binding protein 4 (FABP4) and the development of preeclampsia. *The Journal of clinical endocrinology and metabolism.* 2012 Mar;97(3):E349-56.
3157. Scioscia M, Gumaa K, Kunjara S, Paine MA, Selvaggi LE, Rodeck CH, et al. Insulin resistance in human preeclamptic placenta is mediated by serine phosphorylation of insulin receptor substrate-1 and -2. *The Journal of clinical endocrinology and metabolism.* 2006 Feb;91(2):709-17.
3158. Sciscione AC, Bedder CL, Hoffman MK, Ruhstaller K, Shlossman PA. The timing of adverse events with foley catheter preinduction cervical ripening; Implications for outpatient use. *American Journal of Perinatology.* 2014 October;31(9):781-5.
3159. Sciscione AC, Ivester T, Largoza M, Manley J, Shlossman P, Colmorgen GH. Acute pulmonary edema in pregnancy. *Obstet Gynecol.* 2003 Mar;101(3):511-5.
3160. Scott CA, Bewley S, Rudd A, Spark P, Kurinczuk JJ, Brocklehurst P, et al. Incidence, risk factors, management, and outcomes of stroke in pregnancy. *Obstet Gynecol.* 2012 Aug;120(2 Pt 1):318-24.
3161. Seaman CD, Yabes J, Li J, Moore CG, Ragni MV. Venous thromboembolism in pregnant women with sickle cell disease: A retrospective database analysis. *Thrombosis Research.* 2014 01 Dec;134(6):1249-52.
3162. Seaton SE, Field DJ, Draper ES, Manktelow BN, Smith GCS, Springett A, et al. Socioeconomic inequalities in the rate of stillbirths by cause: A population-based study. *BMJ Open.* 2012;2(3).
3163. Sebillotte CG, Deligny C, Hanf M, Santiago R, Chevallier JC, Volumenie JL, et al. Is African descent an independent risk factor of peripartum cardiomyopathy? *Int J Cardiol.* 2010 Nov 5;145(1):93-4.
3164. Sebire NJ, Backos M, El Gaddal S, Goldin RD, Regan L. Placental pathology, antiphospholipid antibodies, and pregnancy outcome in recurrent miscarriage patients. *Obstet Gynecol.* 2003 Feb;101(2):258-63.
3165. Sebire NJ, Goldin RD, Regan L. Term preeclampsia is associated with minimal histopathological placental features regardless of clinical severity. *Journal of obstetrics and gynaecology : the journal of the Institute of Obstetrics and Gynaecology.* 2005 Feb;25(2):117-8.
3166. Sebire NJ, Jolly M, Harris J, Nicolaides KH, Regan L. Risks of obstetric complications in multiple pregnancies: An analysis of more than 400 000 pregnancies in the UK. *Prenatal and Neonatal Medicine.* 2001;6(2):89-94.
3167. Sebire NJ, Jolly M, Harris J, Regan L, Robinson S. Is maternal underweight really a risk factor for adverse pregnancy outcome? A population-based study in London. *Bjog.* 2001 Jan;108(1):61-6.
3168. Sebire NJ, Jolly M, Harris JP, Wadsworth J, Joffe M, Beard RW, et al. Maternal obesity and pregnancy outcome: a study of 287,213 pregnancies in London. *International journal of obesity and related metabolic disorders : journal of the International Association for the Study of Obesity.* 2001 Aug;25(8):1175-82.
3169. Sedano-Balbas S, Lyons M, Cleary B, Murray M, Gaffney G, Maher M. Acquired activated protein C resistance, thrombophilia and adverse pregnancy outcomes: a study performed in an Irish cohort of pregnant women. *Journal of pregnancy.* 2011;2011:232840.
3170. Seffah JD. Caesarean section and birth weight at Korle Bu Teaching Hospital--preliminary report. *West Afr J Med.* 2002 Jul-Sep;21(3):212-4.
3171. Seiberth V, Linderkamp O. Risk factors in retinopathy of prematurity. a multivariate statistical

analysis. *Ophthalmologica*. 2000;214(2):131-5.

3172. Sekhon LH, Gerber RS, Rebarber A, Saltzman DH, Klauser CK, Gupta S, et al. Effect of oocyte donation on pregnancy outcomes in in vitro fertilization twin gestations. *Fertility and sterility*. 2014 May;101(5):1326-30.

3173. Sekizawa A, Purwosunu Y, Farina A, Shimizu H, Nakamura M, Wibowo N, et al. Prediction of pre-eclampsia by an analysis of placenta-derived cellular mRNA in the blood of pregnant women at 15-20 weeks of gestation. *Bjog*. 2010 Apr;117(5):557-64.

3174. Sellmer A, Bjerre JV, Schmidt MR, McNamara PJ, Hjortdal VE, Host B, et al. Morbidity and mortality in preterm neonates with patent ductus arteriosus on day 3. *Archives of Disease in Childhood: Fetal and Neonatal Edition*. 2013 November;98(6):F505-F10.

3175. Sep S, Smits L, Prins M, Peeters L. Prediction tests for recurrent hypertensive disease in pregnancy, a systematic review. *Hypertension in pregnancy*. 2010 May;29(2):206-30.

3176. Sep SJS, Schreurs MPH, Bekkers SCAM, Kruse AJ, Smits LJ, Peeters LLH. Early-pregnancy changes in cardiac diastolic function in women with recurrent pre-eclampsia and in previously pre-eclamptic women without recurrent disease. *BJOG: An International Journal of Obstetrics and Gynaecology*. 2011 August;118(9):1112-9.

3177. Serenius F, Ewald U, Farooqi A, Holmgren PA, Hakansson S, Sedin G. Short-term outcome after active perinatal management at 23-25 weeks of gestation. A study from two Swedish tertiary care centres. Part 1: maternal and obstetric factors. *Acta paediatrica (Oslo, Norway : 1992)*. 2004 Jul;93(7):945-53.

3178. Serin IS, Kula M, Basbug M, Unluhizarci K, Gucer S, Tayyar M. Androgen levels of preeclamptic patients in the third trimester of pregnancy and six weeks after delivery. *Acta Obstetrica et Gynecologica Scandinavica*. 2001;80(11):1009-13.

3179. Serin IS, Ozcelik B, Basbug M, Kilic H, Okur D, Erez R. Predictive value of tumor necrosis factor alpha (TNF-alpha) in preeclampsia. *European journal of obstetrics, gynecology, and reproductive biology*. 2002 Jan 10;100(2):143-5.

3180. Serjeant GR, Loy LL, Crowther M, Hambleton IR, Thame M. Outcome of pregnancy in homozygous sickle cell disease. *Obstet Gynecol*. 2004 Jun;103(6):1278-85.

3181. Serra V, Moulden M, Bellver J, Redman CW. The value of the short-term fetal heart rate variation for timing the delivery of growth-retarded fetuses. *Bjog*. 2008 Aug;115(9):1101-7.

3182. Serrano NC, Diaz LA, Paez MC, Mesa CM, Cifuentes R, Monterrosa A, et al. Angiotensin-converting enzyme I/D polymorphism and preeclampsia risk: evidence of small-study bias. *PLoS Med*. 2006 Dec;3(12):e520.

3183. Setareh A, Mitra MG, Sedigheh B, Shoaleh S, Vahid Y, Siroos S. Maternal plasma lipid concentrations in first trimester of pregnancy and risk of severe preeclampsia. *Pakistan Journal of Medical Sciences*. 2009 July-September;25(4):563-7.

3184. Sevket O, Ates S, Uysal O, Molla T, Dansuk R, Kelekci S. To evaluate the prevalence and clinical outcomes using a one-step method versus a two-step method to screen gestational diabetes mellitus. *The journal of maternal-fetal & neonatal medicine : the official journal of the European Association of Perinatal Medicine, the Federation of Asia and Oceania Perinatal Societies, the International Society of Perinatal Obstet*. 2014 Jan;27(1):36-41.

3185. Sezer SD, Kucuk M, Yenisey C, Yuksel H, Odabasi AR, Turkmen MK, et al. Comparison of angiogenic and anti-angiogenic factors in maternal and umbilical cord blood in early- and late-onset pre-eclampsia. *Gynecological endocrinology : the official journal of the International Society of Gynecological Endocrinology*. 2012 Aug;28(8):628-32.

3186. Sezik M, Toyran H, Yapar EG. Distribution of ABO and Rh blood groups in patients with HELLP syndrome. *Archives of Gynecology and Obstetrics*. 2002 November;267(1):33-6.

3187. Sgolastra F, Petrucci A, Severino M, Gatto R, Monaco A. Relationship between periodontitis and



pre-eclampsia: a meta-analysis. *PloS one*. 2013;8(8):e71387.

3188. Shaarawy M, Salem ME. The clinical value of microtransferrinuria and microalbuminuria in the prediction of pre-eclampsia. *Clinical Chemistry and Laboratory Medicine*. 2001;39(1):29-34.
3189. Shabbir S, Zahid M, Qazi A. To detect outcome of pregnancy in advanced maternal age among Pakistani women. *Pakistan Journal of Medical and Health Sciences*. 2014 01 Jul;8(3):709-12.
3190. Shah AK, Rajamani K, Whitty JE. Eclampsia: a neurological perspective. *J Neurol Sci*. 2008 Aug 15;271(1-2):158-67.
3191. Shah VA, Yeo CL, Ling YL, Ho LY. Incidence, risk factors of retinopathy of prematurity among very low birth weight infants in Singapore. *Ann Acad Med Singapore*. 2005 Mar;34(2):169-78.
3192. Shahbazian N, Shahbazian H, Ehsanpour A, Aref A, Gharibzadeh S. Hypertension and microalbuminuria 5 years after pregnancies complicated by Pre-eclampsia. *Iranian Journal of Kidney Diseases*. 2011;5(5):324-7.
3193. Shaheen B, Hassan L, Obaid M. Eclampsia, a major cause of maternal and perinatal mortality: a prospective analysis at a tertiary care hospital of Peshawar. *JPMA The Journal of the Pakistan Medical Association*. 2003 Aug;53(8):346-50.
3194. Shahul S, Rhee J, Hacker MR, Gulati G, Mitchell JD, Hess P, et al. Subclinical left ventricular dysfunction in preeclamptic women with preserved left ventricular ejection fraction: A 2D speckle-tracking imaging study. *Circulation: Cardiovascular Imaging*. 2012 November;5(6):734-9.
3195. Shaikh FF, Arain AUR. Effect of intravitreal bevacizumab in diabetic macular edema. *Pakistan Journal of Medical Sciences*. 2011 April - June;27(3):651-5.
3196. Shaker OG, Shehata H. Early prediction of preeclampsia in high-risk women. *J Womens Health (Larchmt)*. 2011 Apr;20(4):539-44.
3197. Shalom G, Shoham-Vardi I, Sergienko R, Wiznitzer A, Sherf M, Sheiner E. Is preeclampsia a significant risk factor for long-term hospitalizations and morbidity? *The journal of maternal-fetal & neonatal medicine : the official journal of the European Association of Perinatal Medicine, the Federation of Asia and Oceania Perinatal Societies, the International Society of Perinatal Obstet*. 2013 Jan;26(1):13-5.
3198. Shames BD, Fernandez LA, Sollinger HW, Chin LT, D'Alessandro AM, Knechtle SJ, et al. Liver transplantation for HELLP syndrome. *Liver transplantation : official publication of the American Association for the Study of Liver Diseases and the International Liver Transplantation Society*. 2005 Feb;11(2):224-8.
3199. Shammas AG, Maayah JF. Hypertension and its relation to renal function 10 years after pregnancy complicated by pre-eclampsia and pregnancy induced hypertension. *Saudi medical journal*. 2000 Feb;21(2):190-2.
3200. Shan HY, Rana S, Epstein FH, Stillman IE, Karumanchi SA, Williams ME. Use of Circulating Antiangiogenic Factors to Differentiate Other Hypertensive Disorders From Preeclampsia in a Pregnant Woman on Dialysis. *American Journal of Kidney Diseases*. 2008 June;51(6):1029-32.
3201. Shand AW, Nassar N, Von Dadelszen P, Innis SM, Green TJ. Maternal vitamin D status in pregnancy and adverse pregnancy outcomes in a group at high risk for pre-eclampsia. *Bjog*. 2010 Dec;117(13):1593-8.
3202. Shand AW, Whitton K, Pasfield A, Nassar N, McShane M, Han X, et al. Evaluation of anti-Mullerian hormone in the first trimester as a predictor for hypertensive disorders of pregnancy and other adverse pregnancy outcomes. *The Australian & New Zealand journal of obstetrics & gynaecology*. 2014 Jun;54(3):244-9.
3203. Shaner J, Coscia LA, Constantinescu S, McGrory CH, Doria C, Moritz MJ, et al. Pregnancy after lung transplant. *Prog Transplant*. 2012 Jun;22(2):134-40.
3204. Shankaran S, Fanaroff AA, Wright LL, Stevenson DK, Donovan EF, Ehrenkranz RA, et al. Risk factors for early death among extremely low-birth-weight infants. *Am J Obstet Gynecol*. 2002

Apr;186(4):796-802.

3205. Shapiro NI, Khankin EV, Van Meurs M, Shih SC, Lu S, Yano M, et al. Leptin exacerbates sepsis-mediated morbidity and mortality. *Journal of immunology (Baltimore, Md : 1950)*. 2010 Jul 1;185(1):517-24.
3206. Sharara HA, Othman SY. A review of eclampsia in Qatar 1991: 2000. *Qatar Medical Journal*. 2002 November;11(2):51-6.
3207. Sharma G, Nesin M, Feuerstein M, Bussel JB. Maternal and neonatal characteristics associated with neonatal neutropenia in hypertensive pregnancies. *Am J Perinatol*. 2009 Oct;26(9):683-9.
3208. Sharma M, Sachdev V, Singh N, Bhardwaj P, Pal A, Kapur S, et al. Alterations in intestinal permeability and endotoxemia in severe acute pancreatitis. *Tropical gastroenterology : official journal of the Digestive Diseases Foundation*. 2012 Jan-Mar;33(1):45-50.
3209. Sharma M, Uprety D, Pokhrel M, Karki A, Sharma U, Babu S. Maternal mortality at B P Koirala Institute of Health Sciences, Nepal: review of 6 years. *Trop Doct*. 2005 Jan;35(1):25-6.
3210. Sharma R, Bolger AP, Li W, Davlouros PA, Volk HD, Poole-Wilson PA, et al. Elevated circulating levels of inflammatory cytokines and bacterial endotoxin in adults with congenital heart disease. *The American journal of cardiology*. 2003 Jul 15;92(2):188-93.
3211. Sharma R, Mir S, Rizvi M, Akthar S. Efficacy of magnesium sulphate versus phenytoin in seizure control and prophylaxis in patients of eclampsia and severe pre-eclampsia. *JK Science*. 2008;10(4):181-5.
3212. Shear RM, Rinfret D, Leduc L. Should we offer expectant management in cases of severe preterm preeclampsia with fetal growth restriction? *Am J Obstet Gynecol*. 2005 Apr;192(4):1119-25.
3213. Sheiner E, Bashiri A, Shoham-Vardi I, Hershkovitz R, Mazor M. Preterm deliveries among women with MacDonalld cerclage performed due to cervical incompetence. *Fetal Diagn Ther*. 2004 Jul-Aug;19(4):361-5.
3214. Shental O, Friger M, Sheiner E. Ethnic differences in the monthly variation of preeclampsia among Bedouin and Jewish parturients in the Negev. *Hypertension in pregnancy*. 2010;29(3):342-9.
3215. Sheth SS, Sheth KN. Treatment of neurocritical care emergencies in pregnancy. *Current Treatment Options in Neurology*. 2012 April;14(2):197-210.
3216. Shetty AK, Honnunar R, Jirli PS. Pattern of burn deaths in Belgaum. *Journal of Forensic Medicine and Toxicology*. 2009 July-December;26(2):23-5.
3217. Shetty M, Shetty PK, Ramesh A, Thomas B, Prabhu S, Rao A. Periodontal disease in pregnancy is a risk factor for preeclampsia. *Acta Obstet Gynecol Scand*. 2010 May;89(5):718-21.
3218. Shevell T, Malone FD, Vidaver J, Porter TF, Luthy DA, Comstock CH, et al. Assisted reproductive technology and pregnancy outcome. *Obstet Gynecol*. 2005 Nov;106(5 Pt 1):1039-45.
3219. Shin JE, Lee Y, Kim SJ, Shin JC. Association of severe thrombocytopenia and poor prognosis in pregnancies with aplastic anemia. *PloS one*. 2014 24 Jul;9(7).
3220. Shin JE, Nam SY, Lee Y, Lee G, Shin JC, Kim YH, et al. Comparison of outcomes after typical and atypical eclampsia: a retrospective study. *The journal of maternal-fetal & neonatal medicine : the official journal of the European Association of Perinatal Medicine, the Federation of Asia and Oceania Perinatal Societies, the International Society of Perinatal Obstet*. 2012 Nov;25(11):2419-23.
3221. Shinar S, Hareuveni M, Ben-Tal O, Many A. Relaparotomies after cesarean sections: Risk factors, indications, and management. *Journal of Perinatal Medicine*. 2013 September;41(5):567-72.
3222. Shiozaki A, Matsuda Y, Hayashi K, Satoh S, Saito S. Comparison of risk factors for major obstetric complications between Western countries and Japan: a case-cohort study. *The journal of obstetrics and gynaecology research*. 2011 Oct;37(10):1447-54.
3223. Shirazee HH, Saha SK, Das I, Mondal T, Samanta S, Sarkar M. Postpartum haemorrhage: A cause of maternal morbidity. *Journal of the Indian Medical Association*. 2010 October;108(10):663-6.
3224. Shirazian T, Monteith S, Friedman F, Rebarber A. Lifestyle modification program decreases

pregnancy weight gain in obese women. *American Journal of Perinatology*. 2010;27(5):411-4.

3225. Shmorgun D, Chan WS, Ray JG. Association between Bell's palsy in pregnancy and pre-eclampsia. *QJM : monthly journal of the Association of Physicians*. 2002 Jun;95(6):359-62.

3226. Short CE, Douglas M, Smith JH, Taylor GP. Preterm delivery risk in women initiating antiretroviral therapy to prevent HIV mother-to-child transmission. *HIV Medicine*. 2014 April;15(4):233-8.

3227. Sibai BM. Diagnosis and management of gestational hypertension and preeclampsia. *Obstet Gynecol*. 2003 Jul;102(1):181-92.

3228. Sibai BM. Diagnosis, controversies, and management of the syndrome of hemolysis, elevated liver enzymes, and low platelet count. *Obstet Gynecol*. 2004 May;103(5 Pt 1):981-91.

3229. Sibai BM. Evaluation and management of severe preeclampsia before 34 weeks' gestation. *American Journal of Obstetrics and Gynecology*. 2011 September;205(3):191-8.

3230. Sibai BM, Caritis S, Hauth J, Lindheimer M, VanDorsten JP, MacPherson C, et al. Risks of preeclampsia and adverse neonatal outcomes among women with pregestational diabetes mellitus. *American Journal of Obstetrics and Gynecology*. 2000;182(2):364-9.

3231. Sibai BM, Caritis SN, Hauth JC, MacPherson C, VanDorsten JP, Klebanoff M, et al. Preterm delivery in women with pregestational diabetes mellitus or chronic hypertension relative to women with uncomplicated pregnancies. *American Journal of Obstetrics and Gynecology*. 2000;183(6):1520-4.

3232. Sibai BM, Koch MA, Freire S, Pinto e Silva JL, Rudge MVC, Martins-Costa S, et al. Serum inhibin A and angiogenic factor levels in pregnancies with previous preeclampsia and/or chronic hypertension: are they useful markers for prediction of subsequent preeclampsia? *American Journal of Obstetrics and Gynecology*. 2008 September;199(3):268.e1-.e9.

3233. Sibude J, Guibourdenche J, Dionne MD, Le Ray C, Anselem O, Serreau R, et al. Placental growth factor for the prediction of adverse outcomes in patients with suspected preeclampsia or intrauterine growth restriction. *PloS one*. 2012;7(11):e50208.

3234. Siddiqui M, Khatri IA, Ahmad A. Maternal and fetal complications in pregnant epileptic women. *Rawal Medical Journal*. 2014;39(2):174-7.

3235. Siddiqui S, Goodman N, McKenna S, Goldie M, Waugh J, Brightling CE. Pre-eclampsia is associated with airway hyperresponsiveness. *Bjog*. 2008 Mar;115(4):520-2.

3236. Sierra-Laguado J, Garcia RG, Celedon J, Arenas-Mantilla M, Pradilla LP, Camacho PA, et al. Determination of insulin resistance using the homeostatic model assessment (HOMA) and its relation with the risk of developing pregnancy-induced hypertension. *American journal of hypertension*. 2007 Apr;20(4):437-42.

3237. Signore C, Mills JL, Qian C, Yu KF, Rana S, Karumanchi SA, et al. Circulating soluble endoglin and placental abruption. *Prenatal diagnosis*. 2008 Sep;28(9):852-8.

3238. Sikder SS, Labrique AB, Shamim AA, Ali H, Mehra S, Wu L, et al. Risk factors for reported obstetric complications and near misses in rural northwest Bangladesh: analysis from a prospective cohort study. *BMC pregnancy and childbirth*. 2014;14:347.

3239. Sikkema JM, Robles de Medina PG, Schaad RR, Mulder EJH, Bruinse HW, Buitelaar JK, et al. Salivary cortisol levels and anxiety are not increased in women destined to develop preeclampsia. *Journal of Psychosomatic Research*. 2001;50(1):45-9.

3240. Silberstein T, Levy A, Harlev A, Saphier O, Sheiner E. Perinatal outcome of pregnancies following in vitro fertilization and ovulation induction. *Journal of Maternal-Fetal and Neonatal Medicine*. 2014 September;27(13):1316-9.

3241. Silva CA, Hilario MO, Febronio MV, Oliveira SK, Almeida RG, Fonseca AR, et al. Pregnancy outcome in juvenile systemic lupus erythematosus: a Brazilian multicenter cohort study. *The Journal of rheumatology*. 2008 Jul;35(7):1414-8.

3242. Silva GB, Jr., Monteiro FA, Mota RM, Paiva JG, Correia JW, Bezerra Filho JG, et al. Acute kidney injury requiring dialysis in obstetric patients: a series of 55 cases in Brazil. *Arch Gynecol Obstet*. 2009

Feb;279(2):131-7.

3243. Silva LM, Coolman M, Steegers EA, Jaddoe VW, Moll HA, Hofman A, et al. Low socioeconomic status is a risk factor for preeclampsia: the Generation R Study. *J Hypertens*. 2008 Jun;26(6):1200-8.
3244. Silva LM, Steegers EA, Burdorf A, Jaddoe VW, Arends LR, Hofman A, et al. No midpregnancy fall in diastolic blood pressure in women with a low educational level: the Generation R Study. *Hypertension*. 2008 Oct;52(4):645-51.
3245. Silva Mde L, Galvao AC, Souza NL, Azevedo GD, Jeronimo SM, Araujo AC. Women with cardiovascular risk after preeclampsia: is there follow-up within the Unified Health System in Brazil? *Revista latino-americana de enfermagem*. 2014 Jan-Feb;22(1):93-9.
3246. Silveira RC, Procianoy RS. High plasma cytokine levels, white matter injury and neurodevelopment of high risk preterm infants: Assessment at two years. *Early Human Development*. 2011 June;87(6):433-7.
3247. Silveira RC, Procianoy RS, Koch MS, Benjamin AC, Schlindwein CF. Growth and neurodevelopment outcome of very low birth weight infants delivered by preeclamptic mothers. *Acta paediatrica (Oslo, Norway : 1992)*. 2007 Dec;96(12):1738-42.
3248. Silver KL, Conroy AL, Leke RG, Leke RJ, Gwanmesia P, Molyneux ME, et al. Circulating soluble endoglin levels in pregnant women in Cameroon and Malawi--associations with placental malaria and fetal growth restriction. *PloS one*. 2011;6(9):e24985.
3249. Silver RK, Wilson RD, Philip J, Thom EA, Zachary JM, Mohide P, et al. Late first-trimester placental disruption and subsequent gestational hypertension/preeclampsia. *Obstetrics and Gynecology*. 2005 March;105(3):587-92.
3250. Silver RM, Zhao Y, Spong CY, Sibai B, Wendel G, Jr., Wenstrom K, et al. Prothrombin gene G20210A mutation and obstetric complications. *Obstet Gynecol*. 2010 Jan;115(1):14-20.
3251. Simbar M, Karimian Z, Afrakhteh M, Akbarzadeh A, Kouchaki E. Increased risk of pre-eclampsia (PE) among women with the history of migraine. *Clinical and experimental hypertension (New York, NY : 1993)*. 2010 May;32(3):159-65.
3252. Simchen MJ, Beiner ME, Strauss-Liviathan N, Dulitzky M, Kuint J, Mashlach S, et al. Neonatal outcome in growth-restricted versus appropriately grown preterm infants. *Am J Perinatol*. 2000;17(4):187-92.
3253. Simchen MJ, Dulitzki M, Rofe G, Shani H, Langevitz P, Schiff E, et al. High positive antibody titers and adverse pregnancy outcome in women with antiphospholipid syndrome. *Acta Obstetrica et Gynecologica Scandinavica*. 2011 December;90(12):1428-33.
3254. Simeone S, Lojo C, Garcia-Esteve L, Triunfo S, Crovetto F, Arranz A, et al. Psychological impact of first-trimester prevention for preeclampsia on anxiety. *Prenatal diagnosis*. 2015 01 Jan;35(1):60-4.
3255. Simetka O, Klat J, Gumulec J, Dolezalkova E, Salounova D, Kacerovsky M. Early identification of women with HELLP syndrome who need plasma exchange after delivery. *Transfusion and Apheresis Science*. 2015 01 Feb;52(1):54-9.
3256. Simmons D. Diabetes and obesity in pregnancy. *Best Practice and Research: Clinical Obstetrics and Gynaecology*. 2011 February;25(1):25-36.
3257. Simmons D, Walters BNJ, Rowan JA, McIntyre HD. Metformin therapy and diabetes in pregnancy. *Medical Journal of Australia*. 2004 03 May;180(9):462-4.
3258. Simms RA, Liebling RE, Patel RR, Denbow ML, Abdel-Fattah SA, Soothill PW, et al. Management and outcome of pregnancies with parvovirus B19 infection over seven years in a tertiary fetal medicine unit. *Fetal Diagn Ther*. 2009;25(4):373-8.
3259. Simonazzi G, Vicenzi C, Rizzo MA, Farina A, Gabrielli S, Arcelli D, et al. Prospective evaluation of the risk of pre-eclampsia using logistic regression analysis. *Ultrasound in Obstetrics and Gynecology*. 2007 September;30(3):312-7.
3260. Simon-Bouy B, Satre V, Ferec C, Malinge MC, Girodon E, Denamur E, et al. Hyperechogenic fetal

- bowel: a large French collaborative study of 682 cases. *American journal of medical genetics Part A*. 2003 Sep 1;121a(3):209-13.
3261. Simpson RW, Kast SJ. Management of gestational diabetes with a conservative insulin protocol. *Med J Aust*. 2000 Jun 5;172(11):537-40.
3262. Sims MA, Collins KA. Fetal death. A 10-year retrospective study. *The American journal of forensic medicine and pathology*. 2001 Sep;22(3):261-5.
3263. Simsek T, Eyigor C, Uyar M, Karaman S, Moral AR. Retrospective review of critically ill obstetrical patients: A decade's experience  
Kritik obstetrik hastalari{n retrospektif degerlendirilmesi: On yi{dotless}lli{dotless}k deneyim. *Turkish Journal of Medical Sciences*. 2011;41(6):1059-64.
3264. Simsek Y, Gul M, Celik O, Aydin NE, Arda Duz S, Celik E, et al. Nuclear transcription factor-kappa beta-dependent ultrastructural alterations within the placenta and systemic inflammatory activation in pregnant patients with hemolysis, elevated liver functions and low thrombocyte count (HELLP) syndrome: a case-control study. *Hypertension in pregnancy*. 2013 Aug;32(3):281-91.
3265. Simsek Y, Yilmaz E, Celik E, Aydogan MS, Celik O, Tugal T. The major clinical determinants of maternal death among obstetric near-miss patients: A tertiary centre experience. *Journal of the Pakistan Medical Association*. 2013 August;63(8):988-91.
3266. Singh G, Chouhan R, Sidhu K. Maternal factors for low birth weight babies. *Medical Journal Armed Forces India*. 2009;65(1):10-2.
3267. Singh N, Sharma B, Sharma M, Sachdev V, Bhardwaj P, Mani K, et al. Evaluation of early enteral feeding through nasogastric and nasojejunal tube in severe acute pancreatitis: a noninferiority randomized controlled trial. *Pancreas*. 2012 Jan;41(1):153-9.
3268. Singh R, Tandon I, Deo S, Natu SM. Does microalbuminuria at mid-pregnancy predict development of subsequent pre-eclampsia? *The journal of obstetrics and gynaecology research*. 2013 Feb;39(2):478-83.
3269. Singh S, Behera AK. Eclampsia in eastern India: Incidence, demographic profile and response to three different anticonvulsant regimes of magnesium sulphate. *Internet Journal of Gynecology and Obstetrics*. 2011;15(2).
3270. Singhal N, Amin HJ, Pollard JK, Tough SC, Johnston DW, Clark DJ, et al. Maternal haemolysis, elevated liver enzymes and low platelets syndrome: perinatal and neurodevelopmental neonatal outcomes for infants weighing less than 1250 g. *J Paediatr Child Health*. 2004 Mar;40(3):121-6.
3271. Singhi PD, Ray M, Suri G. Clinical spectrum of cerebral palsy in north India--an analysis of 1,000 cases. *J Trop Pediatr*. 2002 Jun;48(3):162-6.
3272. Sinha S, Satishchandra P. Epilepsia Partialis Continua over last 14 years: experience from a tertiary care center from south India. *Epilepsy Res*. 2007 Apr;74(1):55-9.
3273. Sirohiwal D, Dahiya K, Khaneja N. Use of 24-hour urinary protein and calcium for prediction of preeclampsia. *Taiwanese journal of obstetrics & gynecology*. 2009 Jun;48(2):113-5.
3274. Siza JE. Risk factors associated with low birth weight of neonates among pregnant women attending a referral hospital in northern Tanzania. *Tanzania journal of health research*. 2008 Jan;10(1):1-8.
3275. Skjaerven R, Vatten LJ, Wilcox AJ, Ronning T, Irgens LM, Lie RT. Recurrence of pre-eclampsia across generations: exploring fetal and maternal genetic components in a population based cohort. *Bmj*. 2005 Oct 15;331(7521):877.
3276. Skjaerven R, Wilcox AJ, Klungsoyr K, Irgens LM, Vikse BE, Vatten LJ, et al. Cardiovascular mortality after pre-eclampsia in one child mothers: prospective, population based cohort study. *Bmj*. 2012;345:e7677.
3277. Skomsvoll JF, Baste V, Irgens LM, Ostensen M. The recurrence risk of adverse outcome in the second pregnancy in women with rheumatic disease1. *Obstet Gynecol*. 2002 Dec;100(6):1196-202.

3278. Skomsvoll JF, Baste V, Irgens LM, Ostensen M. The recurrence risk of adverse outcome in the second pregnancy in women with rheumatic disease. *Obstetrics and Gynecology*. 2002 01 Dec;100(6):1196-202.
3279. Skrastad RB, Hov GG, Blaas HG, Romundstad PR, Salvesen KA. A prospective study of screening for hypertensive disorders of pregnancy at 11-13 weeks in a Scandinavian population. *Acta Obstet Gynecol Scand*. 2014 Dec;93(12):1238-47.
3280. Smith GC, Crossley JA, Aitken DA, Jenkins N, Lyall F, Cameron AD, et al. Circulating angiogenic factors in early pregnancy and the risk of preeclampsia, intrauterine growth restriction, spontaneous preterm birth, and stillbirth. *Obstet Gynecol*. 2007 Jun;109(6):1316-24.
3281. Smith GC, Pell JP, Walsh D. Pregnancy complications and maternal risk of ischaemic heart disease: a retrospective cohort study of 129,290 births. *Lancet*. 2001 Jun 23;357(9273):2002-6.
3282. Smith GC, Shah I, White IR, Pell JP, Dobbie R. Previous preeclampsia, preterm delivery, and delivery of a small for gestational age infant and the risk of unexplained stillbirth in the second pregnancy: a retrospective cohort study, Scotland, 1992-2001. *American journal of epidemiology*. 2007 Jan 15;165(2):194-202.
3283. Smith GC, Stenhouse EJ, Crossley JA, Aitken DA, Cameron AD, Connor JM. Early pregnancy levels of pregnancy-associated plasma protein a and the risk of intrauterine growth restriction, premature birth, preeclampsia, and stillbirth. *The Journal of clinical endocrinology and metabolism*. 2002 Apr;87(4):1762-7.
3284. Smith GCS, Shah I, Pell JP, Crossley JA, Dobbie R. Maternal obesity in early pregnancy and risk of spontaneous and elective preterm deliveries: A retrospective cohort study. *American journal of public health*. 2007 January;97(1):157-62.
3285. Smith GN, Pudwell J, Walker M, Wen SW. Risk estimation of metabolic syndrome at one and three years after a pregnancy complicated by preeclampsia. *Journal of obstetrics and gynaecology Canada : JOGC = Journal d'obstetrique et gynecologie du Canada : JOGC*. 2012 Sep;34(9):836-41.
3286. Smith GN, Pudwell J, Walker M, Wen SW. Ten-year, thirty-year, and lifetime cardiovascular disease risk estimates following a pregnancy complicated by preeclampsia. *Journal of obstetrics and gynaecology Canada : JOGC = Journal d'obstetrique et gynecologie du Canada : JOGC*. 2012 Sep;34(9):830-5.
3287. Smith GN, Walker MC, Liu A, Wen SW, Swansburg M, Ramshaw H, et al. A history of preeclampsia identifies women who have underlying cardiovascular risk factors. *Am J Obstet Gynecol*. 2009 Jan;200(1):58.e1-8.
3288. Smith JM, Lowe RF, Fullerton J, Currie SM, Harris L, Felker-Kantor E. An integrative review of the side effects related to the use of magnesium sulfate for pre-eclampsia and eclampsia management. *BMC pregnancy and childbirth*. 2013;13:34.
3289. Smith NA, Lyons JG, McElrath TF. Protein:creatinine ratio in uncomplicated twin pregnancy. *Am J Obstet Gynecol*. 2010 Oct;203(4):381.e1-4.
3290. Smith ZA, Ayele Y, McDonald P. Outcomes in critical care delivery at Jimma University Specialised Hospital, Ethiopia. *Anaesthesia and Intensive Care*. 2013 May;41(3):363-8.
3291. Smits LJ, North RA, Kenny LC, Myers J, Dekker GA, McCowan LM. Patterns of vaginal bleeding during the first 20 weeks of pregnancy and risk of pre-eclampsia in nulliparous women: results from the SCOPE study. *Acta Obstet Gynecol Scand*. 2012 Nov;91(11):1331-8.
3292. Smyth A, Oliveira GHM, Lahr BD, Bailey KR, Norby SM, Garovic VD. A systematic review and meta-analysis of pregnancy outcomes in patients with systemic lupus erythematosus and lupus nephritis. *Clinical Journal of the American Society of Nephrology*. 2010 01 Nov;5(11):2060-8.
3293. Smyth RM, Spark P, Armstrong N, Duley L. Magpie Trial in the UK: methods and additional data for women and children at 2 years following pregnancy complicated by pre-eclampsia. *BMC pregnancy and childbirth*. 2009;9:15.

3294. Snijder CA, Cornette JM, Hop WC, Kruip MJ, Duvekot JJ. Thrombophylaxis and bleeding complications after cesarean section. *Acta Obstet Gynecol Scand*. 2012 May;91(5):560-5.
3295. Sobande AA, Eskandar M, Bahar A, Abusham A. Severe pre-eclampsia and eclampsia in Abha, the south west region of Saudi Arabia. *Journal of obstetrics and gynaecology : the journal of the Institute of Obstetrics and Gynaecology*. 2007 Feb;27(2):150-4.
3296. Society of Obstetricians and Gynaecologists of C, Okun N, Sierra S. Pregnancy outcomes after assisted human reproduction. *Journal of obstetrics and gynaecology Canada : JOGC = Journal d'obstetrique et gynecologie du Canada : JOGC*. 2014 Jan;36(1):64-83.
3297. Sohlberg S, Stephansson O, Cnattingius S, Wikstrom AK. Maternal body mass index, height, and risks of preeclampsia. *American journal of hypertension*. 2012 Jan;25(1):120-5.
3298. Soliman AA, Csorba R, Yilmaz A, Tsikoaras P, Von Tempelhoff GF. Rheologic results and their correlation to hemostatic changes in patients with moderate and severe preeclampsia: An observational cross-sectional study. *Clinical Hemorheology and Microcirculation*. 2015;59(1):1-15.
3299. Sombie I, Meda N, Hounton S, Bambara M, Ouedraogo TW, Graham W. Missing maternal deaths: lessons from Sourou Sanou University Hospital in Bobo-Dioulasso, Burkina Faso. *Trop Doct*. 2007 Apr;37(2):96-8.
3300. Song Y, Liu J, Li H, Zeng Z, Bian X, Wang S. Outcomes of concurrent Cesarean delivery and pheochromocytoma resection in late pregnancy. *Internal Medicine Journal*. 2013 May;43(5):588-91.
3301. Sorensen S, Von Tabouillot D, Schioler V, Greisen G, Petersen S, Larsen T. Serial measurements of serum human placental lactogen (hPL) and serial ultrasound examinations in the evaluation of fetal growth. *Early Human Development*. 2000;60(1):25-34.
3302. Soriano D, Carp H, Seidman DS, Schiff E, Langevitz P, Mashiach S, et al. Management and outcome of pregnancy in women with thrombophilic disorders and past cerebrovascular events. *Acta Obstet Gynecol Scand*. 2002 Mar;81(3):204-7.
3303. Soto E, Romero R, Kusanovic JP, Ogge G, Hussein Y, Yeo L, et al. Late-onset preeclampsia is associated with an imbalance of angiogenic and anti-angiogenic factors in patients with and without placental lesions consistent with maternal underperfusion. *The journal of maternal-fetal & neonatal medicine : the official journal of the European Association of Perinatal Medicine, the Federation of Asia and Oceania Perinatal Societies, the International Society of Perinatal Obstet*. 2012 May;25(5):498-507.
3304. Soubassi L, Haidopoulos D, Sindos M, Pilalis A, Chaniotis D, Diakomanolis E, et al. Pregnancy outcome in women with pre-existing lupus nephritis. *Journal of obstetrics and gynaecology : the journal of the Institute of Obstetrics and Gynaecology*. 2004 Sep;24(6):630-4.
3305. Souwer ET, Blaauw J, Coffeng SM, Smit AJ, Van Doormaal JJ, Faas MM, et al. Decreased arterial elasticity in formerly early-onset preeclamptic women. *Acta Obstet Gynecol Scand*. 2011 Jul;90(7):797-801.
3306. Spaan JJ, Ekhart T, Spaanderman ME, Peeters LL. Renal function after preeclampsia: a longitudinal pilot study. *Nephron Clinical practice*. 2012;120(3):c156-61.
3307. Spaan JJ, Ekhart T, Spaanderman MEA, Peeters LLH. Remote hemodynamics and renal function in formerly preeclamptic women. *Obstetrics and Gynecology*. 2009 April;113(4):853-9.
3308. Spaan JJ, Sep SJ, van Balen VL, Spaanderman ME, Peeters LL. Metabolic syndrome as a risk factor for hypertension after preeclampsia. *Obstet Gynecol*. 2012 Aug;120(2 Pt 1):311-7.
3309. Spaggiari E, Ruas M, Dreux S, Valat AS, Czerkiewicz I, Guimiot F, et al. Management strategy in pregnancies with elevated second-trimester maternal serum alpha-fetoprotein based on a second assay. *Am J Obstet Gynecol*. 2013 Apr;208(4):303.e1-7.
3310. Spain JE, Tuuli M, Stout MJ, Roehl KA, Odibo AO, Macones GA, et al. Time from uterine incision to delivery and hypoxic neonatal outcomes. *American Journal of Perinatology*. 2015 01 Apr;32(5):497-502.
3311. Sparks TN, Cheng YW, Phan N, Caughey AB. Does risk of preeclampsia differ by twin

- chorionicity? The journal of maternal-fetal & neonatal medicine : the official journal of the European Association of Perinatal Medicine, the Federation of Asia and Oceania Perinatal Societies, the International Society of Perinatal Obstet. 2013 Sep;26(13):1273-7.
3312. Spearman CW, Goddard E, McCulloch MI, Hairwadzi HN, Sonderup MW, Kahn D, et al. Pregnancy following liver transplantation during childhood and adolescence. *Pediatr Transplant*. 2011 Nov;15(7):712-7.
3313. Spencer CA, Allen VM, Flowerdew G, Dooley K, Dodds L. Low levels of maternal serum PAPP-A in early pregnancy and the risk of adverse outcomes. *Prenatal diagnosis*. 2008 Nov;28(11):1029-36.
3314. Spencer K, Cowans NJ, Nicolaides KH. Low levels of maternal serum PAPP-A in the first trimester and the risk of pre-eclampsia. *Prenatal diagnosis*. 2008 January;28(1):7-10.
3315. Spiegel DR, Webb K. A case of treatment refractory hyperemesis gravidarum in a patient with comorbid anxiety, treated successfully with adjunctive gabapentin: A review and the potential role of neurogastroenterology in understanding its pathogenesis and treatment. *Innovations in Clinical Neuroscience*. 2012 December;9(11-12):31-8.
3316. Spinillo A, Beneventi F, Epis OM, Montanari L, Mammoliti D, Ramoni V, et al. The effect of newly diagnosed undifferentiated connective tissue disease on pregnancy outcome. *Am J Obstet Gynecol*. 2008 Dec;199(6):632.e1-6.
3317. Spinillo A, Chiara A, Bergante C, Biancheri D, Fabiana D, Fazzi E. Obstetric risk factors and persistent increases in brain parenchymal echogenicity in preterm infants. *BJOG: An International Journal of Obstetrics and Gynaecology*. 2004 September;111(9):913-8.
3318. Spinillo A, Gardella B, Bariselli S, Alfei A, Silini E, Dal Bello B. Placental histopathological correlates of umbilical artery Doppler velocimetry in pregnancies complicated by fetal growth restriction. *Prenatal diagnosis*. 2012 Dec;32(13):1263-72.
3319. Spinillo A, Gardella B, Bariselli S, Alfei A, Silini EM, Dal Bello B. Cerebroplacental Doppler ratio and placental histopathological features in pregnancies complicated by fetal growth restriction. *Journal of Perinatal Medicine*. 2014 May;42(3):321-8.
3320. Spinillo A, Gardella B, Preti E, Zanchi S, Stronati M, Fazzi E. Rates of neonatal death and cerebral palsy associated with fetal growth restriction among very low birthweight infants. A temporal analysis. *Bjog*. 2006 Jul;113(7):775-80.
3321. Spinillo A, Gardella B, Preti E, Zanchi S, Tziella C, Stronati M. Preeclampsia and brain damage among preterm infants: A changed panorama in a 20-year analysis. *American Journal of Perinatology*. 2007 February;24(2):101-6.
3322. Spinillo A, Montanari L, Gardella B, Roccio M, Stronati M, Fazzi E. Infant sex, obstetric risk factors, and 2-year neurodevelopmental outcome among preterm infants. *Dev Med Child Neurol*. 2009 Jul;51(7):518-25.
3323. Spinnato JA, 2nd, Freire S, Pinto e Silva JL, Rudge MV, Martins-Costa S, Koch MA, et al. Antioxidant supplementation and premature rupture of the membranes: a planned secondary analysis. *Am J Obstet Gynecol*. 2008 Oct;199(4):433.e1-8.
3324. Spratling PM, Pryor ER, Moneyham LD, Hodges AL, White-Williams CL, Martin JN, Jr. Effect of an educational intervention on cardiovascular disease risk perception among women with preeclampsia. *J Obstet Gynecol Neonatal Nurs*. 2014 Mar-Apr;43(2):179-89.
3325. Srettabunjong S. Spontaneous rupture of acute ascending aortic dissection in a young pregnant woman: A sudden unexpected death. *Forensic Science International*. 2013 August;232(1-3):e5-e8.
3326. Srinivas SK, Larkin J, Sammel MD, Appleby D, Bastek J, Andrela CM, et al. The use of angiogenic factors in discriminating preeclampsia: Are they ready for prime time? *Journal of Maternal-Fetal and Neonatal Medicine*. 2010 November;23(11):1294-300.
3327. Srinivas SK, Sammel MD, Stamilio DM, Clothier B, Jeffcoat MK, Parry S, et al. Periodontal disease and adverse pregnancy outcomes: is there an association? *Am J Obstet Gynecol*. 2009



May;200(5):497.e1-8.

3328. Srinivas SK, Stamilio DM, Stevens EJ, Peipert JF, Odibo AO, Macones GA. Safety and success of vaginal birth after cesarean delivery in patients with preeclampsia. *Am J Perinatol.* 2006 Apr;23(3):145-52.

3329. Srinivasan AP, Omprakash BO, Lavanya K, Subbulakshmi Murugesan P, Kandaswamy S. A prospective study of villous capillary lesions in complicated pregnancies. *J Pregnancy.* 2014;2014:193925.

3330. Sritippayawan S, Phupong V. Risk assessment of preeclampsia in advanced maternal age by uterine arteries Doppler at 17-21 weeks of gestation. *Journal of the Medical Association of Thailand = Chotmaihet thangphaet.* 2007 Jul;90(7):1281-6.

3331. St John Sutton M. Familial occurrence of peripartum cardiomyopathy presages a genetic rather than an environmental cause. *Current heart failure reports.* 2010 Dec;7(4):153-5.

3332. Staboulidou I, Soergel P, Schippert C, Hertel H, Hillemanns P, Scharf A. The significance of uterine notching in Doppler sonography in early pregnancy as a predictor for pathologic outcome of the pregnancy. *Arch Gynecol Obstet.* 2007 Jul;276(1):21-8.

3333. Stainton MC, Lohan M, Fethney J, Woodhart L, Islam S. Women's responses to two models of antepartum high-risk care: Day stay and hospital stay. *Women and Birth.* 2006 December;19(4):89-95.

3334. Stamilio DM, Olsen T, Ratcliffe S, Sehdev HM, Macones GA. False-positive 1-hour glucose challenge test and adverse perinatal outcomes. *Obstet Gynecol.* 2004 Jan;103(1):148-56.

3335. Stamilio DM, Sehdev HM, Macones GA. Pregnant women with the sickle cell trait are not at increased risk for developing preeclampsia. *Am J Perinatol.* 2003 Jan;20(1):41-8.

3336. Stamilio DM, Sehdev HM, Morgan MA, Propert K, Macones GA. Can antenatal clinical and biochemical markers predict the development of severe preeclampsia? *Am J Obstet Gynecol.* 2000 Mar;182(3):589-94.

3337. Stanek J. Acute and chronic placental membrane hypoxic lesions. *Virchows Archiv : an international journal of pathology.* 2009 Oct;455(4):315-22.

3338. Stanek J. Utility of diagnosing various histological patterns of diffuse chronic hypoxic placental injury. *Pediatric and developmental pathology : the official journal of the Society for Pediatric Pathology and the Paediatric Pathology Society.* 2012 Jan-Feb;15(1):13-23.

3339. Stanek J, Al-Ahmadie HA. Laminar necrosis of placental membranes: A histologic sign of uteroplacental hypoxia. *Pediatric and Developmental Pathology.* 2005 February;8(1):34-42.

3340. Stanek J, Biesiada J. Sensitivity and specificity of finding of multinucleate trophoblastic giant cells in decidua in placentas from high-risk pregnancies. *Hum Pathol.* 2012 Feb;43(2):261-8.

3341. Stanek J, Biesiada J. Clustering of maternal-fetal clinical conditions and outcomes and placental lesions. *American Journal of Obstetrics and Gynecology.* 2012 June;206(6):493.e1-e8.

3342. Stanek J, Biesiada J, Trzeszcz M. Clinicoplacental phenotypes vary with gestational age: an analysis by classical and clustering methods. *Acta Obstet Gynecol Scand.* 2014 Apr;93(4):392-8.

3343. Stanek J, Eis AL, Myatt L. Nitrotyrosine immunostaining correlates with increased extracellular matrix: evidence of postplacental hypoxia. *Placenta.* 2001 Apr;22 Suppl A:S56-62.

3344. Starikov RS, Inman K, Chien EK, Anderson BL, Rouse DJ, Lopes V, et al. Can hemoglobin A1c in early pregnancy predict adverse pregnancy outcomes in diabetic patients? *J Diabetes Complications.* 2014 Mar-Apr;28(2):203-7.

3345. Starling AP, Engel SM, Richardson DB, Baird DD, Haug LS, Stuebe AM, et al. Perfluoroalkyl substances during pregnancy and validated preeclampsia among nulliparous women in the Norwegian Mother and Child Cohort Study. *American journal of epidemiology.* 2014 Apr 1;179(7):824-33.

3346. Steen EE, Kallen K, Marsal K, Norman M, Hellstrom-Westas L. Impact of sex on perinatal mortality and morbidity in twins. *J Perinat Med.* 2014 Mar;42(2):225-31.

3347. Stehman-Breen C, Miller L, Fink J, Schwartz SM. Pre-eclampsia and premature labour among

- pregnant women with haematuria. *Paediatric and perinatal epidemiology*. 2000 Apr;14(2):136-40.
3348. Stehman-Breen C, Miller L, Fink J, Schwartz SM. Pre-eclampsia and premature labour among pregnant women with haematuria. *Paediatric and perinatal epidemiology*. 2000;14(2):136-40.
3349. Stehman-Breen CO, Levine RJ, Qian C, Morris CD, Catalano PM, Curet LB, et al. Increased risk of preeclampsia among nulliparous pregnant women with idiopathic hematuria. *American Journal of Obstetrics and Gynecology*. 2002 September;187(3):703-8.
3350. Stehr A, Ploner F, Tugtekin I, Matejovic M, Theisen M, Zulke C, et al. Effect of combining nicotinamide as a PARS-inhibitor with selective iNOS blockade during porcine endotoxemia. *Intensive care medicine*. 2003 Jun;29(6):995-1002.
3351. Stein W, Muller S, Gutensohn K, Emons G, Legler T. Cell-free fetal DNA and adverse outcome in low risk pregnancies. *European journal of obstetrics, gynecology, and reproductive biology*. 2013 Jan;166(1):10-3.
3352. Steiner N, Weintraub AY, Madi Y, Barski L, Sheiner E. The unfavorable slope from mild preeclampsia through severe preeclampsia, to eclampsia. *Pregnancy Hypertension*. 2013 April;3(2):146-50.
3353. Steinfeld JD, Valentine S, Lerer T, Ingardia CJ, Wax JR, Curry SL. Obesity-related complications of pregnancy vary by race. *The Journal of maternal-fetal medicine*. 2000 Jul-Aug;9(4):238-41.
3354. Stekkinger E, Scholten R, van der Vlugt MJ, van Dijk AP, Janssen MC, Spaanderman ME. Metabolic syndrome and the risk for recurrent pre-eclampsia: a retrospective cohort study. *Bjog*. 2013 Jul;120(8):979-86.
3355. Stekkinger E, Zandstra M, Peeters LL, Spaanderman ME. Early-onset preeclampsia and the prevalence of postpartum metabolic syndrome. *Obstet Gynecol*. 2009 Nov;114(5):1076-84.
3356. Stella CL, Jodicke CD, How HY, Harkness UF, Sibai BM. Postpartum headache: is your work-up complete? *Am J Obstet Gynecol*. 2007 Apr;196(4):318.e1-7.
3357. Stelmach T, Pisarev H, Talvik T. Ante- and perinatal factors for cerebral palsy: case-control study in Estonia. *J Child Neurol*. 2005 Aug;20(8):654-60.
3358. Stene LC, Magnus P, Lie RT, Sovik O, Joner G. No association between preeclampsia or cesarean section and incidence of type 1 diabetes among children: a large, population-based cohort study. *Pediatr Res*. 2003 Oct;54(4):487-90.
3359. Stene-Larsen K, Brandlistuen RE, Lang AM, Landolt MA, Latal B, Vollrath ME. Communication impairments in early term and late preterm children: A prospective cohort study following children to age 36 months. *Journal of Pediatrics*. 2014 01 Dec;165(6):1123-8.
3360. Stepan H, Faber R, Wessel N, Wallukat G, Schultheiss HP, Walther T. Relation between circulating angiotensin II type 1 receptor agonistic autoantibodies and soluble fms-like tyrosine kinase 1 in the pathogenesis of preeclampsia. *The Journal of clinical endocrinology and metabolism*. 2006 Jun;91(6):2424-7.
3361. Stepan H, Geipel A, Schwarz F, Kramer T, Wessel N, Faber R. Circulatory soluble endoglin and its predictive value for preeclampsia in second-trimester pregnancies with abnormal uterine perfusion. *Am J Obstet Gynecol*. 2008 Feb;198(2):175.e1-6.
3362. Stepan H, Heihoff-Klose A, Faber R. Reduced antioxidant capacity in second-trimester pregnancies with pathological uterine perfusion. *Ultrasound Obstet Gynecol*. 2004 Jun;23(6):579-83.
3363. Stepan H, Nordmeyer AK, Faber R. Proteinuria in hypertensive pregnancy diseases is associated with a longer persistence of hypertension postpartum. *Journal of human hypertension*. 2006 Feb;20(2):125-8.
3364. Stepan H, Unversucht A, Wessel N, Faber R. Predictive value of maternal angiogenic factors in second trimester pregnancies with abnormal uterine perfusion. *Hypertension*. 2007 Apr;49(4):818-24.
3365. Stephansson O, Larsson H, Pedersen L, Kieler H, Granath F, Ludvigsson JF, et al. Crohn's disease is a risk factor for preterm birth. *Clinical gastroenterology and hepatology : the official clinical practice*

- journal of the American Gastroenterological Association. 2010 Jun;8(6):509-15.
3366. Stergiotou I, Crispi F, Valenzuela-Alcaraz B, Bijmens B, Gratacos E. Patterns of maternal vascular remodeling and responsiveness in early- versus late-onset preeclampsia. *Am J Obstet Gynecol*. 2013 Dec;209(6):558.e1-.e14.
3367. Stevens DU, Al-Nasiry S, Bulten J, Spaanderman ME. Decidual vasculopathy and adverse perinatal outcome in preeclamptic pregnancy. *Placenta*. 2012 Aug;33(8):630-3.
3368. Stevens DU, Al-Nasiry S, Bulten J, Spaanderman ME. Decidual vasculopathy in preeclampsia: lesion characteristics relate to disease severity and perinatal outcome. *Placenta*. 2013 Sep;34(9):805-9.
3369. Stevens DU, Al-Nasiry S, Fajta MM, Bulten J, van Dijk AP, van der Vlugt MJ, et al. Cardiovascular and thrombotic risk of decidual vasculopathy in preeclampsia. *Am J Obstet Gynecol*. 2014 Jun;210(6):545.e1-6.
3370. Stevens TA, Carroll MA, Promecene PA, Seibel M, Monga M. Utility of Acute Physiology, Age, and Chronic Health Evaluation (APACHE III) score in maternal admissions to the intensive care unit. *Am J Obstet Gynecol*. 2006 May;194(5):e13-5.
3371. Stewart AM, Macones GA, Odibo AO, Colvin R, Cahill AG. Changes in fetal heart tracing characteristics after magnesium exposure. *Am J Perinatol*. 2014 Nov;31(10):869-74.
3372. Stewart FM, Freeman DJ, Ramsay JE, Greer IA, Caslake M, Ferrell WR. Longitudinal assessment of maternal endothelial function and markers of inflammation and placental function throughout pregnancy in lean and obese mothers. *The Journal of clinical endocrinology and metabolism*. 2007 Mar;92(3):969-75.
3373. Stimac T, Petrovic O, Krajina R, Finderle A. The influence of pre-eclampsia on fetal lung maturity. *International journal of gynaecology and obstetrics: the official organ of the International Federation of Gynaecology and Obstetrics*. 2012 Jul;118(1):18-20.
3374. Stingham AE, Goncalves SM, Bucharles S, Branco FS, Gruber B, Hauser AB, et al. Sevelamer decreases systemic inflammation in parallel to a reduction in endotoxemia. *Blood purification*. 2010;29(4):352-6.
3375. Stokke G, Gjelsvik BL, Flaatten KT, Birkeland E, Flaatten H, Trovik J. Hyperemesis gravidarum, nutritional treatment by nasogastric tube feeding: A 10-year retrospective cohort study. *Acta Obstetrica et Gynecologica Scandinavica*. 2015 01 Apr;94(4):359-67.
3376. Stone CD, Diallo O, Shyken J, Leet T. The combined effect of maternal smoking and obesity on the risk of preeclampsia. *Journal of Perinatal Medicine*. 2007 01 Feb;35(1):28-31.
3377. Stone S, Hunt BJ, Seed PT, Parmar K, Khamashta MA, Poston L. Longitudinal evaluation of markers of endothelial cell dysfunction and hemostasis in treated antiphospholipid syndrome and in healthy pregnancy. *Am J Obstet Gynecol*. 2003 Feb;188(2):454-60.
3378. Stonek F, Bentz EK, Hafner E, Metzenbauer M, Philipp K, Hefler LA, et al. A tumor necrosis factor-alpha promoter polymorphism and pregnancy complications: results of a prospective cohort study in 1652 pregnant women. *Reprod Sci*. 2007 Jul;14(5):425-9.
3379. Stonek F, Hafner E, Metzenbauer M, Katharina S, Stumpflen I, Schneeberger C, et al. Absence of an association of tumor necrosis factor (TNF)-alpha G308A, interleukin-6 (IL-6) G174C and interleukin-10 (IL-10) G1082A polymorphism in women with preeclampsia. *J Reprod Immunol*. 2008 Jan;77(1):85-90.
3380. Stonek F, Hafner E, Metzenbauer M, Stumpflen I, Philipp K. Carriage of the methylenetetrahydrofolate reductase (MTHFR) C677T polymorphism does not influence the first and second trimester uterine artery Doppler flow. *European journal of obstetrics, gynecology, and reproductive biology*. 2008 Oct;140(2):178-82.
3381. Stonek F, Hafner E, Philipp K, Hefler LA, Bentz EK, Tempfer CB. Methylenetetrahydrofolate reductase C677T polymorphism and pregnancy complications. *Obstet Gynecol*. 2007 Aug;110(2 Pt 1):363-8.
3382. Stonek F, Metzenbauer M, Hafner E, Philipp K, Tempfer C. Interleukin-10 -1082 G/A promoter

polymorphism and pregnancy complications: results of a prospective cohort study in 1,616 pregnant women. *Acta Obstet Gynecol Scand*. 2008;87(4):430-3.

3383. Stonek F, Metzenbauer M, Hafner E, Philipp K, Tempfer C. Interleukin 6-174 G/C promoter polymorphism and pregnancy complications: results of a prospective cohort study in 1626 pregnant women. *American journal of reproductive immunology (New York, NY : 1989)*. 2008 Apr;59(4):347-51.

3384. Stoop D, Baumgarten M, Haentjens P, Polyzos NP, De Vos M, Verheyen G, et al. Obstetric outcome in donor oocyte pregnancies: A matched-pair analysis. *Reproductive Biology and Endocrinology*. 2012 06 Jun;10(42).

3385. Stormdal Bring H, Hulthen Varli IA, Kublickas M, Papadogiannakis N, Pettersson K. Causes of stillbirth at different gestational ages in singleton pregnancies. *Acta Obstetrica et Gynecologica Scandinavica*. 2014 January;93(1):86-92.

3386. Stout MJ, Goetzinger KR, Tuuli MG, Cahill AG, Macones GA, Odibo AO. First trimester serum analytes, maternal characteristics and ultrasound markers to predict pregnancies at risk for preterm birth. *Placenta*. 2013 Jan;34(1):14-9.

3387. Stout MJ, Odibo AO, Graseck AS, MacOnes GA, Crane JP, Cahill AG. Leiomyomas at routine second-trimester ultrasound examination and adverse obstetric outcomes. *Obstetrics and Gynecology*. 2010 November;116(5):1056-63.

3388. Stout MJ, Odibo AO, Shanks AL, Longman RE, Macones GA, Cahill AG. Fibroid tumors are not a risk factor for adverse outcomes in twin pregnancies. *Am J Obstet Gynecol*. 2013 Jan;208(1):68.e1-5.

3389. Stramrood CA, Doornbos B, Wessel I, van Geenen M, Aarnoudse JG, van den Berg PP, et al. Fathers with PTSD and depression in pregnancies complicated by preterm preeclampsia or PPRM. *Arch Gynecol Obstet*. 2013 Apr;287(4):653-61.

3390. Stramrood CA, Wessel I, Doornbos B, Aarnoudse JG, van den Berg PP, Schultz WC, et al. Posttraumatic stress disorder following preeclampsia and PPRM: a prospective study with 15 months follow-up. *Reprod Sci*. 2011 Jul;18(7):645-53.

3391. Strand KM, Heimstad R, Iversen AC, Austgulen R, Lydersen S, Andersen GL, et al. Mediators of the association between pre-eclampsia and cerebral palsy: population based cohort study. *Bmj*. 2013;347:f4089.

3392. Strand KM, Odland ML, Iversen AC, Nordbo SA, Vik T, Austgulen R. Cytomegalovirus antibody status at 17-18 weeks of gestation and pre-eclampsia: A case-control study of pregnant women in Norway. *BJOG: An International Journal of Obstetrics and Gynaecology*. 2012 October;119(11):1316-23.

3393. Strang-Karlsson S, Raikonen K, Pesonen AK, Kajantie E, Paavonen EJ, Lahti J, et al. Very low birth weight and behavioral symptoms of attention deficit hyperactivity disorder in young adulthood: the Helsinki study of very-low-birth-weight adults. *The American journal of psychiatry*. 2008 Oct;165(10):1345-53.

3394. Strevens H, Wide-Svensson D, Grubb A, Hansen A, Horn T, Ingemarsson I, et al. Serum cystatin C reflects glomerular endotheliosis in normal, hypertensive and pre-eclamptic pregnancies. *Bjog*. 2003 Sep;110(9):825-30.

3395. Strevens H, Wide-Svensson D, Hansen A, Horn T, Ingemarsson I, Larsen S, et al. Glomerular endotheliosis in normal pregnancy and pre-eclampsia. *Bjog*. 2003 Sep;110(9):831-6.

3396. Striano P, Striano S, Tortora F, De Robertis E, Palumbo D, Elefante A, et al. Clinical spectrum and critical care management of Posterior Reversible Encephalopathy Syndrome (PRES). *Medical Science Monitor*. 2005 November;11(11):CR549-CR53.

3397. Stubert J, Ullmann S, Bolz M, Kulz T, Dieterich M, Richter DU, et al. Prediction of preeclampsia and induced delivery at <34 weeks gestation by sFLT-1 and PIGF in patients with abnormal midtrimester uterine Doppler velocimetry: A prospective cohort analysis. *BMC pregnancy and childbirth*. 2014 August 28;14(1).

3398. Stubert J, Ullmann S, Dieterich M, Diedrich D, Reimer T. Clinical differences between early- and

- late-onset severe preeclampsia and analysis of predictors for perinatal outcome. *Journal of Perinatal Medicine*. 2014 01 Sep;42(5):617-27.
3399. Stuebe AM, Schwarz EB, Grewen K, Rich-Edwards JW, Michels KB, Foster EM, et al. Duration of lactation and incidence of maternal hypertension: A longitudinal cohort study. *American journal of epidemiology*. 2011 15 Nov;174(10):1147-58.
3400. Sturtz WJ, Leef KH, Mackley AB, Sharma S, Bottiglieri T, Paul DA. Homocysteine levels in preterm infants: is there an association with intraventricular hemorrhage? A prospective cohort study. *BMC Pediatr*. 2007;7:38.
3401. Stutzman SS, Brown CA, Hains SM, Godwin M, Smith GN, Parlow JL, et al. The effects of exercise conditioning in normal and overweight pregnant women on blood pressure and heart rate variability. *Biol Res Nurs*. 2010 Oct;12(2):137-48.
3402. Su YN, Lee CN, Cheng WF, Shau WY, Chow SN, Hsieh FJ. Decreased maternal serum placenta growth factor in early second trimester and preeclampsia. *Obstet Gynecol*. 2001 Jun;97(6):898-904.
3403. Suarez B, Alves K, Senat MV, Fromageot J, Fischer C, Rosenberg P, et al. Abdominal pain and preeclampsia: sonographic findings in the maternal liver. *J Ultrasound Med*. 2002 Oct;21(10):1077-83; quiz 85-6.
3404. Subtil D, Goeusse P, Puech F, Lequien P, Biaisque S, Breart G, et al. Aspirin (100 mg) used for prevention of pre-eclampsia in nulliparous women: the Essai Regional Aspirine Mere-Enfant study (Part 1). *Bjog*. 2003 May;110(5):475-84.
3405. Sucak A, Kanat-Pektas M, Gungor T, Mollamahmutoglu L. Leptin levels and antihypertensive treatment in preeclampsia. *Singapore Med J*. 2010 Jan;51(1):39-43.
3406. Suelto MD, Vincent RD, Jr., Larmon JE, Norman PF, Werhan CF. Spinal anesthesia for postpartum tubal ligation after pregnancy complicated by preeclampsia or gestational hypertension. *Regional anesthesia and pain medicine*. 2000 Mar-Apr;25(2):170-3.
3407. Sugulle M, Herse F, Seiler M, Dechend R, Staff AC. Cardiovascular risk markers in pregnancies complicated by diabetes mellitus or preeclampsia. *Pregnancy Hypertension*. 2012 October;2(4):403-10.
3408. Suidan RS, Apuzzio JJ, Williams SF. Obesity, comorbidities, and the cesarean delivery rate. *Am J Perinatol*. 2012 Sep;29(8):623-8.
3409. Sukalich S, Mingione MJ, Glantz JC. Obstetric outcomes in overweight and obese adolescents. *American Journal of Obstetrics and Gynecology*. 2006 September;195(3):851-5.
3410. Sukur YE, Yalcin I, Kahraman K, Bayramov V, Ozmen B, Atabekoglu CS, et al. Predictive value of 3+ spot urinary protein value measured by dipstick in hypertensive pregnant patients. *Hypertension in pregnancy*. 2013;32(2):139-45.
3411. Sulaiman S, Othman S, Razali N, Hassan J. Obstetric and perinatal outcome in teenage pregnancies. *South African Journal of Obstetrics and Gynaecology*. 2013;19(3):77-80.
3412. Suleiman AK. Risk factors on hypertensive disorders among Jordanian pregnant women. *Glob J Health Sci*. 2014 Mar;6(2):138-44.
3413. Sultan M, Khlaif H. Impact of Gestational Impaired Glucose Tolerance Test (GIGTT) on pregnancy outcome. *Jamahiriya Medical Journal*. 2010 Winter;10(4):268-71.
3414. Sultana N, Begum K, Begum A, Akhter U. A lower dose of magnesium sulphate for control of convulsion in eclamptic women of Bangladesh. *Bangladesh Journal of Obstetrics and Gynecology*. 2010 September;25(2):71-6.
3415. Sultana R, Bashir R, Khan B. Presentation and management outcome of eclampsia at Ayub Teaching Hospital, Abbottabad. *J Ayub Med Coll Abbottabad*. 2005 Apr-Jun;17(2):59-62.
3416. Sun G, Tang D, Liang J, Wu M. Increasing prevalence of hypospadias associated with various perinatal risk factors in chinese newborns. *Urology*. 2009 Jun;73(6):1241-5.
3417. Sun LM, Walker MC, Cao HL, Yang Q, Duan T, Kingdom JCP. Assisted reproductive technology and placenta-mediated adverse pregnancy outcomes. *Obstetrics and Gynecology*. 2009

October;114(4):818-24.

3418. Sun Y, Yang H, Sun WJ. Risk factors for pre-eclampsia in pregnant Chinese women with abnormal glucose metabolism. *International journal of gynaecology and obstetrics: the official organ of the International Federation of Gynaecology and Obstetrics*. 2008 Apr;101(1):74-6.
3419. Sunsaneevithayakul P, Titapant V, Ruangvutilert P, Sutantawibul A, Phatihattakorn C, Wataganara T, et al. Relation between gestational weight gain and pregnancy outcomes. *The journal of obstetrics and gynaecology research*. 2014 Apr;40(4):995-1001.
3420. Sural S, Sharma RK, Gupta A, Sharma AP, Gulati S. Acute renal failure associated with liver disease in India: etiology and outcome. *Ren Fail*. 2000;22(5):623-34.
3421. Suranyi A, Retz C, Rigo J, Schaaps JP, Foidart JM. Fetal renal hyperechogenicity in intrauterine growth retardation: importance and outcome. *Pediatr Nephrol*. 2001 Jul;16(7):575-80.
3422. Surapaneni T, Patil Bada V, Praveen Kumar Nirmalan C. Risk for recurrence of pre-eclampsia in the subsequent pregnancy. *Journal of Clinical and Diagnostic Research*. 2013 15 Dec;7(12):2889-91.
3423. Surbek DV, Danzer E, Steinmann C, Tichelli A, Wodnar-Filipowicz A, Hahn S, et al. Effect of preeclampsia on umbilical cord blood hematopoietic progenitor-stem cells. *Am J Obstet Gynecol*. 2001 Sep;185(3):725-9.
3424. Suren P, Gunnes N, Roth C, Bresnahan M, Hornig M, Hirtz D, et al. Parental obesity and risk of autism spectrum disorder. *Pediatrics*. 2014 May;133(5):e1128-e38.
3425. Suri J, Minocha B, Dabral A. Bleeding diathesis as a cause of menorrhagia: A report of 3 cases. *Journal of the Indian Medical Association*. 2012 November;110(11):846-7.
3426. Suri V, Aggarwal N, Saxena S, Malhotra P, Varma S. Maternal and perinatal outcome in idiopathic thrombocytopenic purpura (ITP) with pregnancy. *Acta Obstet Gynecol Scand*. 2006;85(12):1430-5.
3427. Suy A, Martinez E, Coll O, Lonca M, Palacio M, de Lazzari E, et al. Increased risk of pre-eclampsia and fetal death in HIV-infected pregnant women receiving highly active antiretroviral therapy. *AIDS (London, England)*. 2006 Jan 2;20(1):59-66.
3428. Suzuki S, Igarashi M. Risk factors for preeclampsia in Japanese twin pregnancies: comparison with those in singleton pregnancies. *Arch Gynecol Obstet*. 2009 Sep;280(3):389-93.
3429. Svirsky R, Meiri H, Herzog A, Kivity V, Cuckle H, Maymon R. First trimester maternal serum placental protein 13 levels in singleton vs. twin pregnancies with and without severe pre-eclampsia. *J Perinat Med*. 2013 Sep 1;41(5):561-6.
3430. Swank ML, Caughey AB, Farinelli CK, Main EK, Melsop KA, Gilbert WM, et al. The impact of change in pregnancy body mass index on the development of gestational hypertensive disorders. *Journal of perinatology : official journal of the California Perinatal Association*. 2014 Mar;34(3):181-5.
3431. Swank ML, Marshall NE, Caughey AB, Main EK, Gilbert WM, Melsop KA, et al. Pregnancy outcomes in the super obese, stratified by weight gain above and below institute of medicine guidelines. *Obstet Gynecol*. 2014 Dec;124(6):1105-10.
3432. Sween LK, Althouse AD, Roberts JM. Early-pregnancy percent body fat in relation to preeclampsia risk in obese women. *Am J Obstet Gynecol*. 2015 Jan;212(1):84.e1-7.
3433. Syngelaki A, Bredaki FE, Vaikousi E, Maiz N, Nicolaidis KH. Body mass index at 11-13 weeks' gestation and pregnancy complications. *Fetal Diagn Ther*. 2011;30(4):250-65.
3434. Szeto CC, Kwan BC, Chow KM, Lai KB, Pang WF, Chung KY, et al. Endotoxemia is associated with better clinical outcome in incident Chinese peritoneal dialysis patients: a prospective cohort study. *Peritoneal dialysis international : journal of the International Society for Peritoneal Dialysis*. 2010 Mar-Apr;30(2):178-86.
3435. Sziller I, Hupuczi P, Normand N, Halmos A, Papp Z, Witkin SS. Fas (TNFRSF6) gene polymorphism in pregnant women with hemolysis, elevated liver enzymes, and low platelets and in their neonates. *Obstetrics and Gynecology*. 2006 March;107(3):582-7.

3436. Tadin I, Bojic L, Mimica M, Karelovic D, Dogas Z. Hypertensive retinopathy and pre-eclampsia. *Collegium antropologicum*. 2001;25 Suppl:77-81.
3437. Taebi M, Sadat Z, Saberi F, Kalahroudi MA. Early pregnancy waist-to-hip ratio and risk of preeclampsia: A prospective cohort study. *Hypertension Research*. 2015 08 Jan;38(1):80-3.
3438. Taguchi T, Ishii K, Hayashi S, Mabuchi A, Murata M, Mitsuda N. Clinical features and prenatal risk factors for hypertensive disorders in twin pregnancies. *The journal of obstetrics and gynaecology research*. 2014 Jun;40(6):1584-91.
3439. Taha NM, Mahmoud KS, Eisa MK, Darder A. Structural heart disease in pregnancy in El-Minia localities. *Egyptian Heart Journal*. 2013 June;65(2):99-109.
3440. Taherian AA, Dehbashi S, Baghban M. The relationship between random urinary protein-to-creatinine ratio and 24-hours urine protein in diagnosis of proteinuria in mild preeclampsia. *Journal of Research in Medical Sciences*. 2006 January/February;11(1):6-12.
3441. Takahashi H, Hisano M, Sago H, Murashima A, Yamaguchi K. Hypoproteinemia in the second trimester among patients with preeclampsia prior to the onset of clinical symptoms. *Hypertension in pregnancy*. 2014 Feb;33(1):55-60.
3442. Takahashi JC, Iihara K, Ishii A, Watanabe E, Ikeda T, Miyamoto S. Pregnancy-associated intracranial hemorrhage: results of a survey of neurosurgical institutes across Japan. *Journal of stroke and cerebrovascular diseases : the official journal of National Stroke Association*. 2014 Feb;23(2):e65-71.
3443. Takahashi K, Ohkuchi A, Hirashima C, Matsubara S, Suzuki M. Establishing reference values for mean notch depth index, pulsatility index and resistance index in the uterine artery at 16-23 weeks' gestation. *The journal of obstetrics and gynaecology research*. 2012 Nov;38(11):1275-85.
3444. Takase B, Goto T, Hamabe A, Uehata A, Kuroda K, Satomura K, et al. Flow-mediated dilation in brachial artery in the second half of pregnancy and prediction of pre-eclampsia. *Journal of human hypertension*. 2003 Oct;17(10):697-704.
3445. Takeuchi M, Matsuzaki K, Harada M, Nishitani H, Matsuda T. Cerebral hyperperfusion in a patient with eclampsia with perfusion-weighted magnetic resonance imaging. *Radiation medicine*. 2005 Aug;23(5):376-9.
3446. Tam Tam KB, Keiser SD, Sims S, Brewer J, Owens MY, Martin JN, Jr. Antepartum eclampsia <34 weeks case series: advisable to postpone delivery to administer corticosteroids for fetal pulmonary benefit? *Journal of perinatology : official journal of the California Perinatal Association*. 2011 Mar;31(3):161-5.
3447. Tamimi R, Lagiou P, Vatten LJ, Mucci L, Trichopoulos D, Hellerstein S, et al. Pregnancy hormones, pre-eclampsia, and implications for breast cancer risk in the offspring. *Cancer epidemiology, biomarkers & prevention : a publication of the American Association for Cancer Research, cosponsored by the American Society of Preventive Oncology*. 2003 Jul;12(7):647-50.
3448. Tamrakar SR, Chawla CD. Intrauterine foetal death and its probable causes: Two years experience in Dhulikhel Hospital - Kathmandu University hospital. *Kathmandu University Medical Journal*. 2012 October-December;10(40):44-8.
3449. Tan LK, Tan HK, Lee CT, Tan AS. Outcome of pregnancy in Asian women with systemic lupus erythematosus: experience of a single perinatal centre in Singapore. *Ann Acad Med Singapore*. 2002 May;31(3):290-5.
3450. Tan PC, Jacob R, Quek KF, Omar SZ. Readmission risk and metabolic, biochemical, haematological and clinical indicators of severity in hyperemesis gravidarum. *Australian and New Zealand Journal of Obstetrics and Gynaecology*. 2006 October;46(5):446-50.
3451. Tan PC, Jacob R, Quek KF, Omar SZ. Pregnancy outcome in hyperemesis gravidarum and the effect of laboratory clinical indicators of hyperemesis severity. *Journal of Obstetrics and Gynaecology Research*. 2007 August;33(4):457-64.
3452. Tan PC, Omar SZ. Contemporary approaches to hyperemesis during pregnancy. *Current Opinion*

in Obstetrics and Gynecology. 2011 April;23(2):87-93.

3453. Tan PC, Vani S, Lim BK, Omar SZ. Anxiety and depression in hyperemesis gravidarum: prevalence, risk factors and correlation with clinical severity. *European Journal of Obstetrics Gynecology and Reproductive Biology*. 2010 April;149(2):153-8.

3454. Tan PC, Zaidi SN, Azmi N, Omar SZ, Khong SY. Depression, anxiety, stress and hyperemesis Gravidarum: Temporal and case controlled correlates. *PloS one*. 2014 17 Mar;9(3).

3455. Tan YH, Groom KM. A prospective audit of the adherence to a new magnesium sulphate guideline for the neuroprotection of infants born less than 30 weeks' gestation. *Australian and New Zealand Journal of Obstetrics and Gynaecology*. 2015 01 Feb;55(1):90-3.

3456. Tanaka H, Tanaka K, Kamiya C, Iwanaga N, Yoshimatsu J. Analysis of pregnancies in women with Takayasu arteritis: Complication of Takayasu arteritis involving obstetric or cardiovascular events. *Journal of Obstetrics and Gynaecology Research*. 2014;40(9):2031-6.

3457. Tanaka M, Jaamaa G, Kaiser M, Hills E, Soim A, Zhu M, et al. Racial disparity in hypertensive disorders of pregnancy in New York State: a 10-year longitudinal population-based study. *American journal of public health*. 2007 Jan;97(1):163-70.

3458. Tancrede S, Bujold E, Giguere Y, Renald MH, Girouard J, Forest JC. Mid-trimester maternal serum AFP and hCG as markers of preterm and term adverse pregnancy outcomes. *Journal of obstetrics and gynaecology Canada : JOGC = Journal d'obstetrique et gynecologie du Canada : JOGC*. 2015 Feb;37(2):111-6.

3459. Tandberg A, Klungsoyr K, Romundstad LB, Skjaerven R. Pre-eclampsia and assisted reproductive technologies: Consequences of advanced maternal age, interbirth intervals, new partner and smoking habits. *BJOG: An International Journal of Obstetrics and Gynaecology*. 2015 01 Jun;122(7):915-22.

3460. Tande DL, Ralph JL, Johnson LK, Scheett AJ, Hoverson BS, Anderson CM. First trimester dietary intake, biochemical measures, and subsequent gestational hypertension among nulliparous women. *Journal of midwifery & women's health*. 2013 Jul-Aug;58(4):423-30.

3461. Tang CH, Wu CS, Lee TH, Hung ST, Yang CYC, Lee CH, et al. Preeclampsia-eclampsia and the risk of stroke among peripartum in Taiwan. *Stroke*. 2009 01 Apr;40(4):1162-8.

3462. Tania K, Suhrita P, Mohua B, Sikha D, Jyotirmoyee J. Estimation of serum calcium in normal pregnancy, preeclampsia and eclampsia. *Pharmacologyonline*. 2009;1:1194-9.

3463. Tank PD, Chauhan AR, Bhattacharya MS, Warke HS, Raut VS. Neurological complications in eclampsia: a case series. *Int J Fertil Womens Med*. 2004 Mar-Apr;49(2):61-9.

3464. Tanner L, Nanto-Salonen K, Niinikoski H, Erkkola R, Huoponen K, Simell O. Hazards associated with pregnancies and deliveries in lysinuric protein intolerance. *Metabolism: Clinical and Experimental*. 2006 February;55(2):224-31.

3465. Tannetta DS, Redman CW, Sargent IL. Investigation of the actin scavenging system in pre-eclampsia. *European Journal of Obstetrics Gynecology and Reproductive Biology*. 2014 January;172(1):32-5.

3466. Tanous D, Siu SC, Mason J, Greutmann M, Wald RM, Parker JD, et al. B-type natriuretic peptide in pregnant women with heart disease. *Journal of the American College of Cardiology*. 2010 05 Oct;56(15):1247-53.

3467. Tarim E, Bagis T, Kilicdag EB, Sezgin N, Yanik F. Are amniotic fluid C-reactive protein and glucose levels, and white blood cell counts at the time of genetic amniocentesis related with preterm delivery? *J Perinat Med*. 2005;33(6):524-9.

3468. Tarim E, Bal N, Kilicdag E, Kayaselcuk F, Bagis T, Kuscu E. Effects of aspirin on placenta and perinatal outcomes in patients with poor obstetric history. *Arch Gynecol Obstet*. 2006 Jul;274(4):209-14.

3469. Tasnim N, Mahmud G, Arif MS. Impact of reduced prenatal visit frequency on obstetric outcome in low-risk mothers. *Journal of the College of Physicians and Surgeons Pakistan*. 2005 January;15(1):26-9.

3470. Tata LJ, Card TR, Logan RF, Hubbard RB, Smith CJ, West J. Fertility and pregnancy-related events



in women with celiac disease: a population-based cohort study. *Gastroenterology*. 2005 Apr;128(4):849-55.

3471. Tavares F, Nazareth I, Monegal JS, Kolte I, Verstraeten T, Bauchau V. Pregnancy and safety outcomes in women vaccinated with an AS03-adjuvanted split virion H1N1 (2009) pandemic influenza vaccine during pregnancy: A prospective cohort study. *Vaccine*. 2011 26 August;29(37):6358-65.

3472. Taylor BD, Ness RB, Olsen J, Hougaard DM, Skogstrand K, Roberts JM, et al. Serum leptin measured in early pregnancy is higher in women with preeclampsia compared with normotensive pregnant women. *Hypertension*. 2015 04 Mar;65(3):594-9.

3473. Taylor RN, Grimwood J, Taylor RS, McMaster MT, Fisher SJ, North RA. Longitudinal serum concentrations of placental growth factor: Evidence for abnormal placental angiogenesis in pathologic pregnancies. *American Journal of Obstetrics and Gynecology*. 2003 01 Jan;188(1):177-82.

3474. Tayman C, Tonbul A, Uras N, Kahveci H, Koseoglu B, Mansur Tatli M. Evaluation of risk factors for necrotizing enterocolitis in preterm infants  
Preterm bebeklerde nekrotizan enterokolit için risk faktorlerinin değerlendirilmesi. *Guncel Pediatri*. 2011;9(1):7-13.

3475. Tayyar A, Garcia-Tizon Larroca S, Poon LC, Wright D, Nicolaidis KH. Competing risk model in screening for preeclampsia by mean arterial pressure and uterine artery pulsatility index at 30-33 weeks' gestation. *Fetal Diagn Ther*. 2014;36(1):18-27.

3476. Tedoldi CL, Manfredi WC. Myocardial infarction and subsequent pregnancy. *Arquivos brasileiros de cardiologia*. 2000 Apr;74(4):347-50.

3477. Teguet I, Maiga AW, Leppert PC. Maternal and neonatal outcomes of grand multiparas over two decades in Mali. *Acta Obstet Gynecol Scand*. 2012 May;91(5):580-6.

3478. Teh CL, Wong JS, Ngeh NK, Loh WL. Systemic lupus erythematosus pregnancies: a case series from a tertiary, East Malaysian hospital. *Lupus*. 2009 Mar;18(3):278-82.

3479. Teive HA, Brandi IV, Camargo CH, Bittencourt MA, Bonfim CM, Friedrich ML, et al. Reversible posterior leucoencephalopathy syndrome associated with bone marrow transplantation. *Arquivos de neuro-psiquiatria*. 2001 Sep;59(3-b):784-9.

3480. Teixeira PG, Reis ZS, Andrade SP, Rezende CA, Lage EM, Velloso EP, et al. Presymptomatic prediction of preeclampsia with angiogenic factors, in high risk pregnant women. *Hypertension in pregnancy*. 2013 Aug;32(3):312-20.

3481. Teksen F, Dokmeci F, Kavas G, Aribal P, Cengiz L. Copper, zinc and magnesium status in hyperemesis gravidarum. *Journal of Obstetrics and Gynaecology*. 2001;21(1):46-8.

3482. Tempfer CB, Banicher-Todesca D, Zeisler H, Schatten C, Husslein P, Gregg AR. Placental expression and serum concentrations of cytokeratin 19 in preeclampsia. *Obstet Gynecol*. 2000 May;95(5):677-82.

3483. Tempfer CB, Brunner A, Bentz EK, Langer M, Reinhaller A, Hefler LA. Intrauterine fetal death and delivery complications associated with coagulopathy: a retrospective analysis of 104 cases. *J Womens Health (Larchmt)*. 2009 Apr;18(4):469-74.

3484. Tempfer CB, Jirecek S, Riener EK, Zeisler H, Denschlag D, Hefler L, et al. Polymorphisms of thrombophilic and vasoactive genes and severe preeclampsia: A pilot study. *Journal of the Society for Gynecologic Investigation*. 2004 May;11(4):227-31.

3485. Tempfer CB, Schneeberger C, Riener EK, Huber JC. Polymorphisms for the individual risk assessment of gynecologic malignancies and preeclampsia. *Minerva Biotechnologica*. 2004 September;16(3):173-9.

3486. Temple RC, Aldridge V, Stanley K, Murphy HR. Glycaemic control throughout pregnancy and risk of pre-eclampsia in women with type I diabetes. *Bjog*. 2006 Nov;113(11):1329-32.

3487. Temple RC, Aldridge VA, Sampson MJ, Greenwood RH, Heyburn PJ, Glenn A. Impact of pregnancy on the progression of diabetic retinopathy in Type 1 diabetes. *Diabetic medicine : a journal of*

the British Diabetic Association. 2001 Jul;18(7):573-7.

3488. Temple RC, Aldridge VJ, Murphy HR. Prepregnancy care and pregnancy outcomes in women with type 1 diabetes. *Diabetes Care*. 2006 Aug;29(8):1744-9.

3489. Teng RJ, Wu TJ, Garrison RD, Sharma R, Hudak ML. Early neutropenia is not associated with an increased rate of nosocomial infection in very low-birth-weight infants. *Journal of perinatology : official journal of the California Perinatal Association*. 2009 Mar;29(3):219-24.

3490. Tennant PW, Rankin J, Bell R. Maternal body mass index and the risk of fetal and infant death: a cohort study from the North of England. *Human reproduction*. 2011 Jun;26(6):1501-11.

3491. Tennekoon KH, Indika WL, Sugathadasa R, Karunanayake EH, Kumarasiri J, Wijesundera A. LEPR c.668A>G polymorphism in a cohort of Sri Lankan women with pre-eclampsia / pregnancy induced hypertension: a case control study. *BMC Res Notes*. 2012;5:308.

3492. Teran E, Hernandez I, Nieto B, Tavera R, Ocampo JE, Calle A. Coenzyme Q10 supplementation during pregnancy reduces the risk of pre-eclampsia. *International journal of gynaecology and obstetrics: the official organ of the International Federation of Gynaecology and Obstetrics*. 2009 Apr;105(1):43-5.

3493. Terrone DA, Isler CM, May WL, Magann EF, Norman PF, Martin JN, Jr. Cardiopulmonary morbidity as a complication of severe preeclampsia HELLP syndrome. *Journal of perinatology : official journal of the California Perinatal Association*. 2000 Mar;20(2):78-81.

3494. Terry AR, Barker FG, Leffert L, Bateman BT, Souter I, Plotkin SR. Outcomes of hospitalization in pregnant women with CNS neoplasms: A populationbased study. *Neuro-Oncology*. 2012 June;14(6):768-76.

3495. Terry AR, Barker FG, 2nd, Leffert L, Bateman BT, Souter I, Plotkin SR. Neurofibromatosis type 1 and pregnancy complications: a population-based study. *Am J Obstet Gynecol*. 2013 Jul;209(1):46.e1-8.

3496. Tersigni C, Castellani R, de Waure C, Fattorossi A, De Spirito M, Gasbarrini A, et al. Celiac disease and reproductive disorders: meta-analysis of epidemiologic associations and potential pathogenic mechanisms. *Hum Reprod Update*. 2014 Jul-Aug;20(4):582-93.

3497. Tertti K, Ekblad U, Vahlberg T, Ronnema T. Comparison of metformin and insulin in the treatment of gestational diabetes: A retrospective, case-control study. *Review of Diabetic Studies*. 2008 Summer;5(2):95-101.

3498. Terwisscha van Scheltinga JA, Krabbendam I, Spaanderman ME. Differentiating between gestational and chronic hypertension; an explorative study. *Acta Obstet Gynecol Scand*. 2013 Mar;92(3):312-7.

3499. Terzi H, Kale A, Hasdemir PS, Selcuk A, Yavuz A, Genc S. Hearing loss: An unknown complication of pre-eclampsia? *Journal of Obstetrics and Gynaecology Research*. 2015 01 Feb;41(2):188-92.

3500. Teune MJ, Van Wassenaer AG, Van Buuren S, Mol BWJ, Opmeer BC. Perinatal risk-indicators for long-term respiratory morbidity among preterm or very low birth weight neonates. *European Journal of Obstetrics Gynecology and Reproductive Biology*. 2012 August;163(2):134-41.

3501. Thadhani R, Ecker JL, Kettyle E, Sandler L, Frigoletto FD. Pulse pressure and risk of preeclampsia: a prospective study. *Obstet Gynecol*. 2001 Apr;97(4):515-20.

3502. Thadhani R, Ecker JL, Mutter WP, Wolf M, Smirnakis KV, Sukhatme VP, et al. Insulin resistance and alterations in angiogenesis: additive insults that may lead to preeclampsia. *Hypertension*. 2004 May;43(5):988-92.

3503. Thadhani R, Mutter WP, Wolf M, Levine RJ, Taylor RN, Sukhatme VP, et al. First trimester placental growth factor and soluble fms-like tyrosine kinase 1 and risk for preeclampsia. *The Journal of clinical endocrinology and metabolism*. 2004 Feb;89(2):770-5.

3504. Thaithumyanon P, Limpongsanurak S, Praisuwanna P, Punnahitanon S. Perinatal effects of amphetamine and heroin use during pregnancy on the mother and infant. *Journal of the Medical Association of Thailand = Chotmaihet thangphaet*. 2005 Nov;88(11):1506-13.

3505. Thame M, Lewis J, Trotman H, Hambleton I, Serjeant G. The mechanisms of low birth weight in

infants of mothers with homozygous sickle cell disease. *Pediatrics*. 2007 Sep;120(3):e686-93.

3506. Thangaratinam S, Gallos ID, Meah N, Usman S, Ismail KM, Khan KS. How accurate are maternal symptoms in predicting impending complications in women with preeclampsia? A systematic review and meta-analysis. *Acta Obstet Gynecol Scand*. 2011 Jun;90(6):564-73.

3507. Thapa K, Jha R. Magnesium sulphate: a life saving drug. *JNMA; journal of the Nepal Medical Association*. 2008 Jul-Sep;47(171):104-8.

3508. Thilaganathan B, Ralph E, Papageorghiou AT, Melchiorre K, Sheldon J. Raised maternal serum cystatin C: an early pregnancy marker for preeclampsia. *Reprod Sci*. 2009 Aug;16(8):788-93.

3509. Thissier-Levy S, Boucoiran I, Luo ZC, Nuyt AM, Julien P, Fraser WD, et al. Endostatin levels and the risk of subsequent preeclampsia. *European Journal of Obstetrics Gynecology and Reproductive Biology*. 2013 October;170(2):396-400.

3510. Thomas C, Hypponen E, Power C. Prenatal exposures and glucose metabolism in adulthood: are effects mediated through birth weight and adiposity? *Diabetes Care*. 2007 Apr;30(4):918-24.

3511. Thomas T, Jophy R, Mhaskar A, Misquith D. Are we increasing serious maternal morbidity by postponing termination of pregnancy in severe pre-eclampsia/eclampsia? *Journal of obstetrics and gynaecology : the journal of the Institute of Obstetrics and Gynaecology*. 2005 May;25(4):347-51.

3512. Thompson BC, Kingdon EJ, Tuck SM, Fernando ON, Sweny P. Pregnancy in renal transplant recipients: the Royal Free Hospital experience. *QJM : monthly journal of the Association of Physicians*. 2003 Nov;96(11):837-44.

3513. Thompson ML, Ananth CV, Jaddoe VWV, Miller RS, Williams MA. The association of maternal adult weight trajectory with preeclampsia and gestational diabetes mellitus. *Paediatric and perinatal epidemiology*. 2014 July;28(4):287-96.

3514. Thompson MO, Vines SK, Aquilina J, Wathen NC, Harrington K. Are placental lakes of any clinical significance? *Placenta*. 2002 Sep-Oct;23(8-9):685-90.

3515. Thomson F, Shanbhag S, Templeton A, Bhattacharya S. Obstetric outcome in women with subfertility. *Bjog*. 2005 May;112(5):632-7.

3516. Thornton CE, Makris A, Ogle RF, Tooher JM, Hennessy A. Role of proteinuria in defining pre-eclampsia: clinical outcomes for women and babies. *Clinical and experimental pharmacology & physiology*. 2010 Apr;37(4):466-70.

3517. Thorsell M, Kaijser M, Almstrom H, Andolf E. Expected day of delivery from ultrasound dating versus last menstrual period--obstetric outcome when dates mismatch. *Bjog*. 2008 Apr;115(5):585-9.

3518. Thorsell M, Kaijser M, Almstrom H, Andolf E. Expected day of delivery from ultrasound dating versus last menstrual period - Obstetric outcome when dates mismatch. *BJOG: An International Journal of Obstetrics and Gynaecology*. 2008 April;115(5):585-9.

3519. Thyagarajan C, Dasari P, Habeebullah S. Maternal and perinatal outcome in pregnancies following infertility. *International Journal of Infertility and Fetal Medicine*. 2010 September-December;1(1):25-9.

3520. Tihtonen K, Koobi T, Yli-Hankala A, Huhtala H, Uotila J. Maternal haemodynamics in pre-eclampsia compared with normal pregnancy during caesarean delivery. *Bjog*. 2006 Jun;113(6):657-63.

3521. Tikkanen M, Hamalainen E, Nuutila M, Paavonen J, Ylikorkala O, Hiilesmaa V. Elevated maternal second-trimester serum alpha-fetoprotein as a risk factor for placental abruption. *Prenatal diagnosis*. 2007 Mar;27(3):240-3.

3522. Tiller H, Killie MK, Husebekk A, Skogen B, Ni H, Kjeldsen-Kragh J, et al. Platelet antibodies and fetal growth: maternal antibodies against fetal platelet antigen 1a are strongly associated with reduced birthweight in boys. *Acta Obstet Gynecol Scand*. 2012 Jan;91(1):79-86.

3523. Timmermans S, Bonsel GJ, Steegers-Theunissen RP, Mackenbach JP, Steyerberg EW, Raat H, et al. Individual accumulation of heterogeneous risks explains perinatal inequalities within deprived

neighbourhoods. *Eur J Epidemiol.* 2011 Feb;26(2):165-80.

3524. Timmermans S, Jaddoe VW, Silva LM, Hofman A, Raat H, Steegers-Theunissen RP, et al. Folic acid is positively associated with uteroplacental vascular resistance: the Generation R study. *Nutrition, metabolism, and cardiovascular diseases : NMCD.* 2011 Jan;21(1):54-61.

3525. Tincani A, Rebaioli CB, Andreoli L, Lojacono A, Motta M. Neonatal effects of maternal antiphospholipid syndrome. *Current rheumatology reports.* 2009 Feb;11(1):70-6.

3526. Ting JYS. Difficult diagnosis in the emergency department: Hyperemesis in early trimester pregnancy because of incarcerated maternal diaphragmatic hernia. *EMA - Emergency Medicine Australasia.* 2008 October;20(5):441-3.

3527. Tiralongo GM, Lo Presti D, Pisani I, Gagliardi G, Scala RL, Novelli GP, et al. Assessment of total vascular resistance and total body water in normotensive women during the first trimester of pregnancy. A key for the prevention of preeclampsia. *Pregnancy Hypertension.* 2015 01 Apr;5(2):193-7.

3528. Tirosh D, Benshalom-Tirosh N, Novack L, Press F, Beer-Weise R, Wiznitzer A, et al. Hypothyroidism and diabetes mellitus - A risky dual gestational endocrinopathy. *PeerJ.* 2013;2013(1).

3529. Tita AT, Biggio JR, Chapman V, Neely C, Rouse DJ. Perinatal and maternal outcomes in women with sickle or hemoglobin C trait. *Obstet Gynecol.* 2007 Nov;110(5):1113-9.

3530. Tjoa ML, van Vugt JM, Mulders MA, Schutgens RB, Oudejans CB, van Wijk IJ. Plasma placenta growth factor levels in midtrimester pregnancies. *Obstet Gynecol.* 2001 Oct;98(4):600-7.

3531. To WW, Cheung W, Mok KM. Hepatitis B surface antigen carrier status and its correlation to gestational hypertension. *The Australian & New Zealand journal of obstetrics & gynaecology.* 2003 Apr;43(2):119-22.

3532. Toal M, Chan C, Fallah S, Alkazaleh F, Chaddha V, Windrim RC, et al. Usefulness of a placental profile in high-risk pregnancies. *Am J Obstet Gynecol.* 2007 Apr;196(4):363.e1-7.

3533. Toal M, Keating S, Machin G, Dodd J, Adamson SL, Windrim RC, et al. Determinants of adverse perinatal outcome in high-risk women with abnormal uterine artery Doppler images. *Am J Obstet Gynecol.* 2008 Mar;198(3):330.e1-7.

3534. Tobias DK, Hu FB, Forman JP, Chavarro J, Zhang C. Increased risk of hypertension after gestational diabetes mellitus: Findings from a large prospective cohort study. *Diabetes Care.* 2011 July;34(7):1582-4.

3535. Todorova K, Palaveev O, Petkova VB, Stefanova M, Dimitrova Z. A pharmacoeconomical model for choice of a treatment for pregnant women with gestational diabetes. *Acta Diabetol.* 2007 Sep;44(3):144-8.

3536. Todros T, Verdiglione P, Ogge G, Paladini D, Vergani P, Cardaropoli S. Low incidence of hypertensive disorders of pregnancy in women treated with spiramycin for toxoplasma infection. *British journal of clinical pharmacology.* 2006 Mar;61(3):336-40.

3537. Toft JH, Lian IA, Tarca AL, Erez O, Espinoza J, Eide IP, et al. Whole-genome microarray and targeted analysis of angiogenesis-regulating gene expression (ENG, FLT1, VEGF, PIGF) in placentas from pre-eclamptic and small-for-gestational-age pregnancies. *The journal of maternal-fetal & neonatal medicine : the official journal of the European Association of Perinatal Medicine, the Federation of Asia and Oceania Perinatal Societies, the International Society of Perinatal Obstet.* 2008 Apr;21(4):267-73.

3538. Toh S, Mitchell AA, Louik C, Werler MM, Chambers CD, Hernandez-Diaz S. Selective serotonin reuptake inhibitor use and risk of gestational hypertension. *The American journal of psychiatry.* 2009 Mar;166(3):320-8.

3539. Toivonen S, Heinonen S, Anttila M, Kosma VM, Saarikoski S. Reproductive risk factors, Doppler findings, and outcome of affected births in placental abruption: a population-based analysis. *Am J Perinatol.* 2002 Nov;19(8):451-60.

3540. Toivonen S, Heinonen S, Anttila M, Kosma VM, Saarikoski S. Obstetric prognosis after placental abruption. *Fetal Diagn Ther.* 2004 Jul-Aug;19(4):336-41.

3541. Toker S, Ozer K. Avascular necrosis of the capitate. *Orthopedics*. 2010;33(11).
3542. Tollanes MC, Aarsand AK, Sandberg S. Excess risk of adverse pregnancy outcomes in women with porphyria: a population-based cohort study. *J Inher Metab Dis*. 2011 Feb;34(1):217-23.
3543. Tollanes MC, Melve KK, Irgens LM, Skjaerven R. Reduced fertility after cesarean delivery: a maternal choice. *Obstet Gynecol*. 2007 Dec;110(6):1256-63.
3544. Tomita Y, Iwadoh K, Kutsunai K, Koyama I, Nakajima I, Fuchinoue S. Negative impact of underlying noneinsulin-dependent diabetes mellitus nephropathy on long-term allograft survival in kidney transplantation: A 10-year analysis from a single center. *Transplantation Proceedings*. 2014;46(10):3438-42.
3545. Tommaselli GA, Pighetti M, Nasti A, D'Elia A, Guida M, Di Carlo C, et al. Serum leptin levels and uterine Doppler flow velocimetry at 20 weeks' gestation as markers for the development of pre-eclampsia. *Gynecological endocrinology : the official journal of the International Society of Gynecological Endocrinology*. 2004 Sep;19(3):160-5.
3546. Tong S. Activin A, hypoxia and the prediction of obstetric outcomes. *Australian and New Zealand Journal of Obstetrics and Gynaecology*. 2006 April;46(2):146-7.
3547. Tongprasert F, Srisupundit K, Luewan S, Tongsong T. Comparison of maternal serum PIGF and sFlt-1 between pregnancies with and without fetal hemoglobin Bart's disease. *Prenatal diagnosis*. 2013 December;33(13):1272-5.
3548. Tongsong T, Srisupundit K, Luewan S. Outcomes of pregnancies affected by hemoglobin H disease. *International Journal of Gynecology and Obstetrics*. 2009 March;104(3):206-8.
3549. Tooke LJ, Smith J, Griffith-Richards S, Maritz JS. Thymic size at birth in preterm infants with severe respiratory distress syndrome can be used to predict the likelihood of survival: A retrospective cohort study. *SAJCH South African Journal of Child Health*. 2010;4(2):50-3.
3550. Torgersen L, Von Holle A, Reichborn-Kjennerud T, Berg CK, Hamer R, Sullivan P, et al. Nausea and vomiting of pregnancy in women with bulimia nervosa and eating disorders not otherwise specified. *International Journal of Eating Disorders*. 2008 December;41(8):722-7.
3551. Torjusen H, Brantsaeter AL, Haugen M, Alexander J, Bakketeig LS, Lieblein G, et al. Reduced risk of pre-eclampsia with organic vegetable consumption: Results from the prospective Norwegian mother and child cohort study. *BMJ Open*. 2014;4(9).
3552. Torrance HL, Bloemen MC, Mulder EJ, Nikkels PG, Derks JB, de Vries LS, et al. Predictors of outcome at 2 years of age after early intrauterine growth restriction. *Ultrasound in obstetrics & gynecology : the official journal of the International Society of Ultrasound in Obstetrics and Gynecology*. 2010 Aug;36(2):171-7.
3553. Torrance HL, Krediet TG, Vreman HJ, Visser GH, van Bel F. Oxidative stress and proinflammatory cytokine levels are increased in premature neonates of preeclamptic mothers with HELLP syndrome. *Neonatology*. 2008;94(2):138-42.
3554. Torrance HL, Mulder EJH, Brouwers HAA, Van Bel F, Visser GHA. Respiratory outcome in preterm small for gestational age fetuses with or without abnormal umbilical artery Doppler and/or maternal hypertension. *Journal of Maternal-Fetal and Neonatal Medicine*. 2007;20(8):613-21.
3555. Torrance HL, Voorbij HA, Wijnberger LD, van Bel F, Visser GH. Lung maturation in small for gestational age fetuses from pregnancies complicated by placental insufficiency or maternal hypertension. *Early Hum Dev*. 2008 Jul;84(7):465-9.
3556. Torricelli M, Sabatini L, Florio P, Scaccia V, Voltolini C, Biliotti G, et al. Levels of antibodies against protein C and protein S in pregnancy and in preeclampsia. *The journal of maternal-fetal & neonatal medicine : the official journal of the European Association of Perinatal Medicine, the Federation of Asia and Oceania Perinatal Societies, the International Society of Perinatal Obstet*. 2009 Nov;22(11):993-9.
3557. Toubi E, Krause I, Fraser A, Lev S, Stojanovich L, Rovinsky J, et al. Livedo reticularis is a marker for predicting multi-system thrombosis in antiphospholipid syndrome. *Clin Exp Rheumatol*. 2005

Jul-Aug;23(4):499-504.

3558. Toubi E, Krause I, Fraser A, Lev S, Stojanovich L, Rovensky J, et al. Livedo reticularis is a marker for predicting multi-system thrombosis in antiphospholipid syndrome. *Clinical and Experimental Rheumatology*. 2005 July/August;23(4):499-504.
3559. Townend J, Shetty A, Campbell D, Bhattacharya S. Does miscarriage in an initial pregnancy lead to adverse obstetric and perinatal outcomes in the next continuing pregnancy? *BJOG: An International Journal of Obstetrics and Gynaecology*. 2008 December;115(13):1623-9.
3560. Towner D, Gandhi S, El Kady D. Obstetric outcomes in women with elevated maternal serum human chorionic gonadotropin. *Am J Obstet Gynecol*. 2006 Jun;194(6):1676-81; discussion 81-2.
3561. Trager K, Matejovic M, Vogt J, Zulke C, Vlatten A, Wachter U, et al. Hepatic oxygen exchange and energy metabolism in hyperdynamic porcine endotoxemia: effects of the combined thromboxane receptor antagonist and synthase inhibitor DTTX30. *Intensive care medicine*. 2001 Feb;27(2):416-25.
3562. Trager K, Matejovic M, Zulke C, Vlatten A, Vogt J, Wachter U, et al. Hepatic O<sub>2</sub> exchange and liver energy metabolism in hyperdynamic porcine endotoxemia: effects of iloprost. *Intensive care medicine*. 2000 Oct;26(10):1531-9.
3563. Tran TS, Jamulitrat S, Chongsuvivatwong V, Geater A. Risk factors for postcesarean surgical site infection. *Obstet Gynecol*. 2000 Mar;95(3):367-71.
3564. Tranquilli AL, Giannubilo SR. The "weight" of fetal growth restriction in 437 hypertensive pregnancies. *Arch Gynecol Obstet*. 2004 Dec;270(4):214-6.
3565. Trapani A, Jr., Goncalves LF, Pires MM. Transdermal nitroglycerin in patients with severe pre-eclampsia with placental insufficiency: effect on uterine, umbilical and fetal middle cerebral artery resistance indices. *Ultrasound Obstet Gynecol*. 2011 Oct;38(4):389-94.
3566. Treloar SA, Cooper DW, Brennecke SP, Grehan MM, Martin NG. An Australian twin study of the genetic basis of preeclampsia and eclampsia. *Am J Obstet Gynecol*. 2001 Feb;184(3):374-81.
3567. Trevisan G, Ramos JG, Martins-Costa S, Barros EJ. Pregnancy in patients with chronic renal insufficiency at Hospital de Clinicas of Porto Alegre, Brazil. *Ren Fail*. 2004 Jan;26(1):29-34.
3568. Triche EW, Grosso LM, Belanger K, Darefsky AS, Benowitz NL, Bracken MB. Chocolate consumption in pregnancy and reduced likelihood of preeclampsia. *Epidemiology (Cambridge, Mass)*. 2008 May;19(3):459-64.
3569. Triche EW, Saftlas AF, Belanger K, Leaderer BP, Bracken MB. Association of asthma diagnosis, severity, symptoms, and treatment with risk of preeclampsia. *Obstet Gynecol*. 2004 Sep;104(3):585-93.
3570. Trilla CC, Medina MC, Ginovart G, Betancourt J, Armengol JA, Calaf J. Maternal risk factors and obstetric complications in late preterm prematurity. *European Journal of Obstetrics Gynecology and Reproductive Biology*. 2014 August;179:105-9.
3571. Trogstad L, Magnus P, Moffett A, Stoltenberg C. The effect of recurrent miscarriage and infertility on the risk of pre-eclampsia. *BJOG: An International Journal of Obstetrics and Gynaecology*. 2009 January;116(1):108-13.
3572. Trogstad L, Magnus P, Skjaerven R, Stoltenberg C. Previous abortions and risk of pre-eclampsia. *International journal of epidemiology*. 2008;37(6):1333-40.
3573. Trogstad LI, Eskild A, Bruu AL, Jeansson S, Jenum PA. Is preeclampsia an infectious disease? *Acta Obstet Gynecol Scand*. 2001 Nov;80(11):1036-8.
3574. Trogstad LI, Stoltenberg C, Magnus P, Skjaerven R, Irgens LM. Recurrence risk in hyperemesis gravidarum. *BJOG: an international journal of obstetrics and gynaecology*. 2005 Dec;112(12):1641-5.
3575. Troisi R, Titus-Ernstoff L, Hyer M, Hatch EE, Robboy SJ, Strohsnitter W, et al. Preeclampsia risk in women exposed in utero to diethylstilbestrol. *Obstet Gynecol*. 2007 Jul;110(1):113-20.
3576. Tronnes H, Wilcox AJ, Lie RT, Markestad T, Moster D. Risk of cerebral palsy in relation to pregnancy disorders and preterm birth: a national cohort study. *Dev Med Child Neurol*. 2014 Aug;56(8):779-85.

3577. Trotta F, Da Cas R, Spila Alegiani S, Gramegna M, Venegoni M, Zocchetti C, et al. Evaluation of safety of A/H1N1 pandemic vaccination during pregnancy: cohort study. *Bmj*. 2014;348:g3361.
3578. Trujillo J, Vigo A, Duncan BB, Falavigna M, Wendland EM, Campos MA, et al. Impact of the International Association of Diabetes and Pregnancy Study Groups criteria for gestational diabetes. *Diabetes Research and Clinical Practice*. 2015 01 May;108(2):288-95.
3579. Truong YN, Yee LM, Caughey AB, Cheng YW. Weight gain in pregnancy: does the Institute of Medicine have it right? *Am J Obstet Gynecol*. 2015 Mar;212(3):362.e1-8.
3580. Tsikouras P, Dafopoulos A, Trypsianis G, Vrachnis N, Bouchlariotou S, Liatsikos SA, et al. Pregnancies and their obstetric outcome in two selected age groups of teenage women in Greece. *The journal of maternal-fetal & neonatal medicine : the official journal of the European Association of Perinatal Medicine, the Federation of Asia and Oceania Perinatal Societies, the International Society of Perinatal Obstet*. 2012 Sep;25(9):1606-11.
3581. Tsoumpou I, Mohamed AM, Tower C, Roberts SA, Nardo LG. Failed IVF cycles and the risk of subsequent preeclampsia or fetal growth restriction: A case-control exploratory study. *Fertility and sterility*. 2011 01 Mar;95(3):973-8.
3582. Tsunoda T, Ohkuchi A, Izumi A, Watanabe T, Matsubara S, Sato I, et al. Antithrombin III activity and platelet count are more likely to decrease in twin pregnancies than in singleton pregnancies. *Acta Obstet Gynecol Scand*. 2002 Sep;81(9):840-5.
3583. Tuffnell DJ, Jankowicz D, Lindow SW, Lyons G, Mason GC, Russell IF, et al. Outcomes of severe pre-eclampsia/eclampsia in Yorkshire 1999/2003. *Bjog*. 2005 Jul;112(7):875-80.
3584. Tuin J, Sanders JS, de Joode AA, Stegeman CA. Pregnancy in women diagnosed with antineutrophil cytoplasmic antibody-associated vasculitis: outcome for the mother and the child. *Arthritis care & research*. 2012 Apr;64(4):539-45.
3585. Tukur J, Muhammad Z. Management of eclampsia at AKTH: before and after magnesium sulphate. *Niger J Med*. 2010 Jan-Mar;19(1):104-7.
3586. Tukur J, Umar BA, Rabi'u A. Pattern of eclampsia in a tertiary health facility situated in a semi-rural town in Northern Nigeria. *Ann Afr Med*. 2007 Dec;6(4):164-7.
3587. Tukur J, Umar NI, Khan N, Musa D. Comparison of emergency caesarean section to misoprostol induction for the delivery of antepartum eclamptic patients: a pilot study. *Niger J Med*. 2007 Oct-Dec;16(4):364-7.
3588. Tulek F, Kahraman A, Taskin S, Ozkavukcu E, Soylemez F. Changes in first trimester screening test parameters in pregnancies complicated by placenta previa and association with hyperemesis gravidarum. *Journal of the Turkish German Gynecology Association*. 2014;15(4):212-6.
3589. Tun C, Quinones JN, Kurt A, Smulian JC, Rochon M. Comparison of 12-hour urine protein and protein:creatinine ratio with 24-hour urine protein for the diagnosis of preeclampsia. *Am J Obstet Gynecol*. 2012 Sep;207(3):233.e1-8.
3590. Tuovinen S, Aalto-Viljakainen T, Eriksson JG, Kajantie E, Lahti J, Pesonen AK, et al. Maternal hypertensive disorders during pregnancy: adaptive functioning and psychiatric and psychological problems of the older offspring. *Bjog*. 2014 Nov;121(12):1482-91.
3591. Tuovinen S, Raikkonen K, Kajantie E, Pesonen AK, Heinonen K, Osmond C, et al. Depressive symptoms in adulthood and intrauterine exposure to pre-eclampsia: the Helsinki Birth Cohort Study. *Bjog*. 2010 Sep;117(10):1236-42.
3592. Tuovinen S, Raikkonen K, Pesonen AK, Lahti M, Heinonen K, Wahlbeck K, et al. Hypertensive disorders in pregnancy and risk of severe mental disorders in the offspring in adulthood: The Helsinki Birth Cohort Study. *Journal of Psychiatric Research*. 2012 March;46(3):303-10.
3593. Turgal M, Selcuk I, Ozyuncu O. Pregnancy outcome of five patients with renal amyloidosis regarding familial Mediterranean fever. *Ren Fail*. 2014 Mar;36(2):306-8.
3594. Turossi L, Bereczky LK, Rozsnyai FF, Kiss SL, Puscasiu L, Szabo B. The prognostic value of biometric

data in placentation at the end of the first trimester. *Ginecoro*. 2012;8(3):110-5.

3595. Tussupkaliyev A, Bermagambetova S, Daribay Z, Sarsembaeva L, Bliyeva R. Influence of the vaginal opportunistic microflora on fetoplacental complex in pregnant women with preeclampsia. *Journal of Pure and Applied Microbiology*. 2015;9(1):697-704.

3596. Tuuli MG, Cahill A, Stamilio D, Macones G, Odibo AO. Comparative efficiency of measures of early fetal growth restriction for predicting adverse perinatal outcomes. *Obstet Gynecol*. 2011 Jun;117(6):1331-40.

3597. Tuuli MG, Rampersad R, Stamilio D, Macones G, Odibo AO. Perinatal outcomes in women with preeclampsia and superimposed preeclampsia: do they differ? *Am J Obstet Gynecol*. 2011 Jun;204(6):508.e1-7.

3598. Tuuri AL, Jauhiainen MS, Tikkanen MJ, Kaaja RJ. Systolic blood pressure and fatty acid-binding protein 4 predict pregnancy-induced hypertension in overweight nulliparous women. *Placenta*. 2014 Oct;35(10):797-801.

3599. Tyagi A, Kathuria H, Bhattacharya A. Prediction of outcome in eclampsia patients. *Journal of Anaesthesiology Clinical Pharmacology*. 2005 July;21(3):287-92.

3600. Tyldum EV, Romundstad PR, Slordahl SA. Pre-pregnancy physical activity and preeclampsia risk: a prospective population-based cohort study. *Acta Obstet Gynecol Scand*. 2010 Mar;89(3):315-20.

3601. Tzur T, Sheiner E. Is there an association between platelet count during the first trimester and preeclampsia or other obstetric complications later in pregnancy? *Hypertension in pregnancy*. 2013;32(1):74-82.

3602. Tzur T, Sheiner E, Weintraub AY, Mazor M, Wiznitzer A, Silberstein E, et al. "At fingers' ends": risk factors and perinatal outcome of pregnancies complicated by digital malformations. *Arch Gynecol Obstet*. 2011 Jan;283(1):47-52.

3603. Ueland PM, Nygard O, Vollset SE, Refsum H. The Hordaland Homocysteine Studies. *Lipids*. 2001;36 Suppl:S33-9.

3604. Ugurel MS, Hayakawa M. Implications of post-gadolinium MRI results in 13 cases with posterior reversible encephalopathy syndrome. *Eur J Radiol*. 2005 Mar;53(3):441-9.

3605. Ugwu EO, Dim CC, Okonkwo CD, Nwankwo TO. Maternal and perinatal outcome of severe pre-eclampsia in Enugu, Nigeria after introduction of Magnesium sulfate. *Nigerian journal of clinical practice*. 2011 Oct-Dec;14(4):418-21.

3606. Ukachukwu VE, Unger H, Onoka C, Nduka C, Maina S, Ngugi N. Maternal morbidity and mortality in peri-urban Kenya--assessing progress in improving maternal healthcare. *East Afr J Public Health*. 2009 Aug;6(2):112-8.

3607. Ulkumen B, Silfeler D, Sofuoglu K, Silfeler I, Dayicioğlu V. The incidence of preeclampsia in Intra-Cytoplasmic Sperm Injection pregnancies. *Pakistan Journal of Medical Sciences*. 2013;30(1).

3608. Ulmannova T, Bartaskova D, Spalova I, Zaban P, Vesely Z, Stechova K. Maternal BMI and HDL as predictors of pregnancy outcome in women with type 1 diabetes. *The journal of maternal-fetal & neonatal medicine : the official journal of the European Association of Perinatal Medicine, the Federation of Asia and Oceania Perinatal Societies, the International Society of Perinatal Obstet*. 2014 Oct;27(15):1580-3.

3609. Ulusoy E, Tufekci O, Duman N, Kumral A, Irken G, Oren H. Thrombocytopenia in neonates: causes and outcomes. *Ann Hematol*. 2013 Jul;92(7):961-7.

3610. Unal O, Kars B, Buyukbayrak EE, Karsidag AY, Turan C. The effectiveness of bilateral hypogastric artery ligation for obstetric hemorrhage in three different underlying conditions and its impact on future fertility. *The journal of maternal-fetal & neonatal medicine : the official journal of the European Association of Perinatal Medicine, the Federation of Asia and Oceania Perinatal Societies, the International Society of Perinatal Obstet*. 2011 Oct;24(10):1273-6.

3611. Unsal MA, Guven S. Complete hydatidiform mole coexisting with a live fetus. *Clinical and*



Experimental Obstetrics and Gynecology. 2012;39(2):262-4.

3612. Ura B, Feriotto G, Monasta L, Bilel S, Zweyer M, Celeghini C. Potential role of circulating microRNAs as early markers of preeclampsia. *Taiwanese journal of obstetrics & gynecology*. 2014 Jun;53(2):232-4.

3613. Urassa D, Carlstedt A, Nystrom L, Massawe S, Lindmark G. Eclampsia in Dar es Salaam, Tanzania - Incidence, outcome, and the role of antenatal care. *Acta Obstetrica et Gynecologica Scandinavica*. 2006 May;85(5):571-8.

3614. Urassa DP, Carlstedt A, Nystrom L, Massawe SN, Lindmark G. Eclampsia in Dar es Salaam, Tanzania -- incidence, outcome, and the role of antenatal care. *Acta Obstet Gynecol Scand*. 2006;85(5):571-8.

3615. Urato AC, Bond B, Craigo SD, Norwitz ER, Paulus JK, Strohsnitter WC. Admission uric acid levels and length of expectant management in preterm preeclampsia. *Journal of perinatology : official journal of the California Perinatal Association*. 2012 Oct;32(10):757-62.

3616. Urban G, Vergani P, Tironi R, Ceruti P, Vertemati E, Sala F, et al. Antithrombotic prophylaxis in multiparous women with preeclampsia or intrauterine growth retardation in an antecedent pregnancy. *Int J Fertil Womens Med*. 2007 Mar-Jun;52(2-3):59-67.

3617. Usluer H, Turker G, Gokalp AS. Value of homocysteine levels, troponin I, and score for neonatal acute physiology and perinatal extension II as early predictors of morbidity. *Pediatrics International*. 2012 February;54(1):104-10.

3618. Usmani I, Kamal Z, Ashraf T. Frequency of perinatal mortality at Bolan Medical Complex Hospital Quetta. *Medical Forum Monthly*. 2013 March;24(3):2-5.

3619. Utas C, Yalcindag C, Taskapan H, Guven M, Oymak O, Yucesoy M. Acute renal failure in Central Anatolia. *Nephrology, dialysis, transplantation : official publication of the European Dialysis and Transplant Association - European Renal Association*. 2000 Feb;15(2):152-5.

3620. Uxa R, Baczyk D, Kingdom JC, Viero S, Casper R, Keating S. Genetic polymorphisms in the fibrinolytic system of placentas with massive perivillous fibrin deposition. *Placenta*. 2010 Jun;31(6):499-505.

3621. Vaarasmaki M, Anttila M, Pirttiaho H, Hartikainen AL. Are recurrent pregnancies a risk in Type 1 diabetes? *Acta Obstet Gynecol Scand*. 2002 Dec;81(12):1110-5.

3622. Vadachkoria S, Sanchez SE, Qiu C, Muy-Rivera M, Malinow MR, Williams MA. Hyperhomocyst(e)inemia and elevated soluble vascular cell adhesion molecule-1 concentrations are associated with an increased risk of preeclampsia. *Gynecologic and Obstetric Investigation*. 2004;58(3):133-9.

3623. Vadnais MA, Rana S, Quant HS, Salahuddin S, Dodge LE, Lim KH, et al. The impact of magnesium sulfate therapy on angiogenic factors in preeclampsia. *Pregnancy Hypertension*. 2012 January;2(1):16-21.

3624. Vainio M, Kujansuu E, Iso-Mustajarvi M, Maenpaa J. Low dose acetylsalicylic acid in prevention of pregnancy-induced hypertension and intrauterine growth retardation in women with bilateral uterine artery notches. *Bjog*. 2002 Feb;109(2):161-7.

3625. Vainio M, Kujansuu E, Koivisto AM, Maenpaa J. Bilateral notching of uterine arteries at 12-14 weeks of gestation for prediction of hypertensive disorders of pregnancy. *Acta Obstetrica et Gynecologica Scandinavica*. 2005 November;84(11):1062-7.

3626. Vainio M, Riutta A, Koivisto AM, Maenpaa J. Prostacyclin, thromboxane A and the effect of low-dose ASA in pregnancies at high risk for hypertensive disorders. *Acta Obstet Gynecol Scand*. 2004 Dec;83(12):1119-23.

3627. Vainio M, Riutta A, Koivisto AM, Maenpaa J. Prostacyclin, thromboxane A2 and the effect of low-dose ASA in pregnancies at high risk for hypertensive disorders. *Acta Obstetrica et Gynecologica Scandinavica*. 2004 December;83(12):1119-23.

3628. Vaisbuch E, Romero R, Mazaki-Tovi S, Kusanovic JP, Chaiworapongsa T, Dong Z, et al. Maternal plasma retinol binding protein 4 in acute pyelonephritis during pregnancy. *J Perinat Med*. 2010 Jul;38(4):359-66.
3629. Valdes ER, Lattes KA, Munoz HS, Barja PY, Papapietro KV. First-trimester adiponectin and subsequent development of preeclampsia or fetal growth restriction. *Gynecol Obstet Invest*. 2011;72(3):152-6.
3630. Valensise H, Vasapollo B, Novelli GP, Pasqualetti P, Galante A, Arduini D. Maternal total vascular resistance and concentric geometry: a key to identify uncomplicated gestational hypertension. *Bjog*. 2006 Sep;113(9):1044-52.
3631. Valent AM, DeFranco EA, Allison A, Salem A, Klarquist L, Gonzales K, et al. Expectant management of mild preeclampsia versus superimposed preeclampsia up to 37 weeks. *Am J Obstet Gynecol*. 2015 Apr;212(4):515.e1-8.
3632. Valenzuela-Alcaraz B, Crispi F, Bijmens B, Cruz-Lemini M, Creus M, Sitges M, et al. Assisted reproductive technologies are associated with cardiovascular remodeling in utero that persists postnatally. *Circulation*. 2013 24 Sep;128(13):1442-50.
3633. Vallier HA, Cureton BA, Schubeck D. Pregnancy outcomes after pelvic ring injury. *Journal of orthopaedic trauma*. 2012 May;26(5):302-7.
3634. Vambergue A, Lautier C, Valat AS, Cortet-Rudelli C, Grigorescu F, Dewailly D. Follow-up study of two sisters with type A syndrome of severe insulin resistance gives a new insight into PCOS pathogenesis in relation to puberty and pregnancy outcome: A case report. *Human reproduction*. 2006 May;21(5):1274-8.
3635. van den Hooven EH, de Kluizenaar Y, Pierik FH, Hofman A, van Ratingen SW, Zandveld PY, et al. Air pollution, blood pressure, and the risk of hypertensive complications during pregnancy: the generation R study. *Hypertension*. 2011 Mar;57(3):406-12.
3636. van den Hooven EH, Jaddoe VW, de Kluizenaar Y, Hofman A, Mackenbach JP, Steegers EA, et al. Residential traffic exposure and pregnancy-related outcomes: a prospective birth cohort study. *Environmental health : a global access science source*. 2009;8:59.
3637. Van Der Burg JW, Allred EN, McElrath TF, Fichorova RN, Kuban K, O'Shea TM, et al. Is maternal obesity associated with sustained inflammation in extremely low gestational age newborns? *Early Human Development*. 2013 December;89(12):949-55.
3638. Van Der Merwe JL, Hall DR, Wright C, Schubert P, Grove D. Are early and late preeclampsia distinct subclasses of the disease what does the placenta reveal. *Hypertension in pregnancy*. 2010 November;29(4):457-67.
3639. van der Tuuk K, Koopmans CM, Groen H, Aarnoudse JG, van den Berg PP, van Beek JJ, et al. Prediction of progression to a high risk situation in women with gestational hypertension or mild pre-eclampsia at term. *The Australian & New Zealand journal of obstetrics & gynaecology*. 2011 Aug;51(4):339-46.
3640. van der Zanden LF, Galesloot TE, Feitz WF, Brouwers MM, Shi M, Knoers NV, et al. Exploration of gene-environment interactions, maternal effects and parent of origin effects in the etiology of hypospadias. *The Journal of urology*. 2012 Dec;188(6):2354-60.
3641. Van Der Zanden M, Groot Hop-De RJ, Sweep FC, Ross HA, Heijer MD, Spaanderman ME. Subclinical hypothyroidism after vascular complicated pregnancy. *Hypertension in pregnancy*. 2013;32(1):1-10.
3642. Van Dissel JT, Numan SC, Van't Wout JW. Chills in 'early sepsis': good for you? *Journal of internal medicine*. 2005 May;257(5):469-72.
3643. Van Hanegem N, Miltenburg AS, Zwart JJ, Bloemenkamp KWM, Van Roosmalen J. Severe acute maternal morbidity in asylum seekers: A two-year nationwide cohort study in the Netherlands. *Acta Obstetrica et Gynecologica Scandinavica*. 2011 September;90(9):1010-6.

3644. van Hoorn J, Dekker G, Jeffries B. Gestational diabetes versus obesity as risk factors for pregnancy-induced hypertensive disorders and fetal macrosomia. *The Australian & New Zealand journal of obstetrics & gynaecology*. 2002 Feb;42(1):29-34.
3645. Van Iddekinge B, Hofmeyr GJ, Buchmann E. Visual interpretation of the effect of maternal betamethasone administration on the fetal heart rate pattern. *Journal of Obstetrics and Gynaecology*. 2003 July;23(4):360-3.
3646. Van Kuijk SM, Delahaije DH, Dirksen CD, Scheepers HC, Spaanderman ME, Ganzevoort W, et al. External validation of a model for periconceptual prediction of recurrent early-onset preeclampsia. *Hypertension in pregnancy*. 2014 August;33(3):265-76.
3647. Van Lindingham M, Nguyen TV, Roberts A, Parent AD, Zhang J. Risk factors of congenital hydrocephalus: a 10 year retrospective study. *Journal of neurology, neurosurgery, and psychiatry*. 2009 Feb;80(2):213-7.
3648. van Langevelde P, Joop K, van Loon J, Frolich M, Groeneveld PH, Westendorp RG, et al. Endotoxin, cytokines, and procalcitonin in febrile patients admitted to the hospital: identification of subjects at high risk of mortality. *Clinical infectious diseases : an official publication of the Infectious Diseases Society of America*. 2000 Dec;31(6):1343-8.
3649. Van Leeuwen W, Nilsson S, Merlo J. Mother's country of birth and prescription of psychotropic medication in Swedish adolescents: A life course approach. *BMJ Open*. 2012;2(5).
3650. Van Oostwaard MF, Langenveld J, Bijloo R, Wong KM, Scholten I, Loix S, et al. Prediction of recurrence of hypertensive disorders of pregnancy between 34 and 37 weeks of gestation: A retrospective cohort study. *BJOG: An International Journal of Obstetrics and Gynaecology*. 2012 June;119(7):840-7.
3651. Van Oostwaard MF, Langenveld J, Schuit E, Papatsonis DNM, Brown MA, Byaruhanga RN, et al. Recurrence of hypertensive disorders of pregnancy: An individual patient data metaanalysis. *American Journal of Obstetrics and Gynecology*. 2015 01 May;212(5):624.e1-.e17.
3652. Van Oostwaard MF, Langenveld J, Schuit E, Wigny K, Van Susante H, Beune I, et al. Prediction of recurrence of hypertensive disorders of pregnancy in the term period, a retrospective cohort study. *Pregnancy Hypertension*. 2014 July;4(3):194-202.
3653. van Pampus MG, Wolf H, Mayruhu G, Treffers PE, Bleker OP. Long-term follow-up in patients with a history of (H)HELLP syndrome. *Hypertension in pregnancy*. 2001;20(1):15-23.
3654. Van Pampus MG, Wolf H, Weijmar Schultz WCM, Neeleman J, Aarnoudse JG. Posttraumatic stress disorder following preeclampsia and HELLP syndrome. *Journal of Psychosomatic Obstetrics and Gynecology*. 2004 September/December;25(3-4):183-7.
3655. van Rijn BB, Hoeks LB, Bots ML, Franx A, Bruinse HW. Outcomes of subsequent pregnancy after first pregnancy with early-onset preeclampsia. *American Journal of Obstetrics and Gynecology*. 2006 September;195(3):723-8.
3656. van Rijn BB, Veerbeek JH, Scholtens LC, Post Uiterweer ED, Koster MP, Peeters LL, et al. C-reactive protein and fibrinogen levels as determinants of recurrent preeclampsia: a prospective cohort study. *J Hypertens*. 2014 Feb;32(2):408-14.
3657. van Schie PEM, Rep A, Ganzevoort W, de Groot L, Wolf H, van Wassenaer AG, et al. General movements in infants born from mothers with early-onset hypertensive disorders of pregnancy in relation to one year's neurodevelopmental outcome. *Early Human Development*. 2008 September;84(9):605-11.
3658. Van Wagner V, Osepchook C, Harney E, Crosbie C, Tulugak M. Remote midwifery in Nunavik, Quebec, Canada: outcomes of perinatal care for the Inuulitsivik health centre, 2000-2007. *Birth*. 2012 Sep;39(3):230-7.
3659. van Wyk L, van der Marel J, Schuerwegh AJ, Schouffoer AA, Voskuyl AE, Huizinga TW, et al. Increased incidence of pregnancy complications in women who later develop scleroderma: a case

control study. *Arthritis Res Ther*. 2011;13(6):R183.

3660. Vandenberghe G, Mensink I, Twisk JWR, Blankenstein MA, Heijboer AC, van Vugt JMG. First trimester screening for intra-uterine growth restriction and early-onset pre-eclampsia. *Prenatal diagnosis*. 2011 October;31(10):955-61.

3661. Vandraas KF, Vikanes AV, Stoer NC, Vangen S, Magnus P, Grjibovski AM. Is hyperemesis gravidarum associated with placental weight and the placental weight-to-birth weight ratio? A population-based Norwegian cohort study. *Placenta*. 2013 November;34(11):990-4.

3662. Vandraas KF, Vikanes AV, Vangen S, Magnus P, Stoer NC, Grjibovski AM. Hyperemesis gravidarum and birth outcomes - A population-based cohort study of 2.2 million births in the Norwegian Birth Registry. *BJOG: An International Journal of Obstetrics and Gynaecology*. 2013 December;120(13):1654-60.

3663. Vanek M, Sheiner E, Levy A, Mazor M. Chronic hypertension and the risk for adverse pregnancy outcome after superimposed pre-eclampsia. *International journal of gynaecology and obstetrics: the official organ of the International Federation of Gynaecology and Obstetrics*. 2004 Jul;86(1):7-11.

3664. Vantyghem MC, Vincent-Desplanques D, Defrance-Faivre F, Capeau J, Fermon C, Valat AS, et al. Fertility and obstetrical complications in women with LMNA-related familial partial lipodystrophy. *The Journal of clinical endocrinology and metabolism*. 2008 Jun;93(6):2223-9.

3665. Vanya M, Arva-Nagy N, Szili K, Szok D, Bartfai G. Effects of maternal epilepsy and antiepileptic therapy in women during pregnancy. *Ideggyogyaszati Szemle*. 2015 30 Mar;68(3-4):105-12.

3666. Vasaikar MS, Kanthikar SN, Tambse MP. Clinico-pathological co-relation of maternal death in rural areas of north Maharashtra. *International Journal of Pharma and Bio Sciences*. 2014 January/March;5(1):B449-B56.

3667. Vasconcellos AG, Leal RD, Silvany-Neto A, Nascimento-Carvalho CM. Oxacillin or cefalotin treatment of hospitalized children with cellulitis. *Jpn J Infect Dis*. 2012;65(1):7-12.

3668. Vasconcelos MS, Sampaio AS, Hounie AG, Akkerman F, Curi M, Lopes AC, et al. Prenatal, Perinatal, and Postnatal Risk Factors in Obsessive-Compulsive Disorder. *Biological Psychiatry*. 2007 01 Feb;61(3):301-7.

3669. Vasquez DN, Das Neves AV, Aphalo VB, Loudet CI, Roberti J, Cicora F, et al. Health insurance status and outcomes of critically ill obstetric patients: A prospective cohort study in Argentina. *Journal of Critical Care*. 2014 February;29(2):199-203.

3670. Vasudeva A, Abraham AA, Kamath A. A prospective observational study of early fetal growth velocity and its association with birth weight, gestational age at delivery, preeclampsia, and perinatal mortality. *Eur J Radiol*. 2013 Aug;82(8):1313-7.

3671. Vatten LJ, Asvold BO, Eskild A. Angiogenic factors in maternal circulation and preeclampsia with or without fetal growth restriction. *Acta Obstet Gynecol Scand*. 2012 Dec;91(12):1388-94.

3672. Vatten LJ, Eskild A, Nilsen TI, Jeansson S, Jenum PA, Staff AC. Changes in circulating level of angiogenic factors from the first to second trimester as predictors of preeclampsia. *Am J Obstet Gynecol*. 2007 Mar;196(3):239.e1-6.

3673. Vatten LJ, Forman MR, Nilsen TIL, Barrett JC, Romundstad PR. The negative association between pre-eclampsia and breast cancer risk may depend on the offspring's gender. *British Journal of Cancer*. 2007 07 May;96(9):1436-8.

3674. Vatten LJ, Nilsen TIL, Juul A, Jeansson S, Jenum PA, Eskild A. Changes in circulating level of IGF-I and IGF-binding protein-1 from the first to second trimester as predictors of preeclampsia. *European Journal of Endocrinology*. 2008 January;158(1):101-5.

3675. Vatten LJ, Romundstad PR, Jenum PA, Eskild A. Angiogenic balance in pregnancy and subsequent breast cancer risk and survival: A population study. *Cancer Epidemiology Biomarkers and Prevention*. 2009 July;18(7):2074-8.

3676. Vatten LJ, Romundstad PR, Trichopoulos D, Skjaerven R. Pre-eclampsia in pregnancy and

subsequent risk for breast cancer. *Br J Cancer*. 2002 Oct 21;87(9):971-3.

3677. Vatten LJ, Skjaerven R. Is pre-eclampsia more than one disease? *Bjog*. 2004 Apr;111(4):298-302.

3678. Vedmedovska N, Rezeberga D, Teibe U, Zodzika J, Donders GG. Preventable maternal risk factors and association of genital infection with fetal growth restriction. *Gynecol Obstet Invest*. 2010;70(4):291-8.

3679. Veerapen MK, Pelaez L, Potter JE, Duthely L, Birusingh R, Rampersaud E, et al. Bridging the gaps between the histopathological and demographic risk factors of preterm birth in a unique Miami inner-city population. *Fetal and pediatric pathology*. 2014 Aug;33(4):226-33.

3680. Veerbeek JH, Hermes W, Breimer AY, van Rijn BB, Koenen SV, Mol BW, et al. Cardiovascular disease risk factors after early-onset preeclampsia, late-onset preeclampsia, and pregnancy-induced hypertension. *Hypertension*. 2015 Mar;65(3):600-6.

3681. Veerbeek JH, Smit JG, Koster MP, Post Uiterweer ED, van Rijn BB, Koenen SV, et al. Maternal cardiovascular risk profile after placental abruption. *Hypertension*. 2013 Jun;61(6):1297-301.

3682. Veiby G, Daltveit AK, Gilhus NE. Pregnancy, delivery and perinatal outcome in female survivors of polio. *J Neurol Sci*. 2007 Jul 15;258(1-2):27-32.

3683. Veltman-Verhulst SM, Van Rijn BB, Westerveld HE, Franx A, Bruinse HW, Fauser BCJM, et al. Polycystic ovary syndrome and early-onset preeclampsia: Reproductive manifestations of increased cardiovascular risk. *Menopause*. 2010 September-October;17(5):990-6.

3684. Velzing-Aarts FV, van der Dijs FP, Muskiet FA, Duits AJ. The association of pre-eclampsia with the Duffy negative phenotype in women of West African descent. *Bjog*. 2002 Apr;109(4):453-5.

3685. Venet C, Zeni F, Viallon A, Ross A, Pain P, Gery P, et al. Endotoxaemia in patients with severe sepsis or septic shock. *Intensive care medicine*. 2000 May;26(5):538-44.

3686. Venkat-Raman N, Backos M, Teoh TG, Lo WT, Regan L. Uterine artery Doppler in predicting pregnancy outcome in women with antiphospholipid syndrome. *Obstet Gynecol*. 2001 Aug;98(2):235-42.

3687. Ventura W, De Paco Matallana C, Prieto-Sanchez MT, Macizo MI, Pertegal M, Nieto A, et al. Uterine and umbilical artery Doppler at 28weeks for predicting adverse pregnancy outcomes in women with abnormal uterine artery Doppler findings in the early second trimester. *Prenatal diagnosis*. 2015 01 Mar;35(3):294-8.

3688. Verbeek ALM, Verbeek AJM. Timely assessment of cardiovascular risk after preeclampsia. *Women's Health*. 2014 01 Nov;10(6):557-9.

3689. Vercellini P, Parazzini F, Pietropaolo G, Cipriani S, Frattaruolo MP, Fedele L. Pregnancy outcome in women with peritoneal, ovarian and rectovaginal endometriosis: a retrospective cohort study. *Bjog*. 2012 Nov;119(12):1538-43.

3690. Vergani P, Roncaglia N, Andreotti C, Arreghini A, Teruzzi M, Pezzullo JC, et al. Prognostic value of uterine artery Doppler velocimetry in growth-restricted fetuses delivered near term. *Am J Obstet Gynecol*. 2002 Oct;187(4):932-6.

3691. Verlohren S, Melchiorre K, Khalil A, Thilaganathan B. Uterine artery Doppler, birth weight and timing of onset of pre-eclampsia: providing insights into the dual etiology of late-onset pre-eclampsia. *Ultrasound Obstet Gynecol*. 2014 Sep;44(3):293-8.

3692. Verspyck E, Borg JY, Roman H, Thobois B, Pia P, Marpeau L. Hereditary thrombophilia and recurrence of ischemic placental disease. *Am J Obstet Gynecol*. 2010 Jan;202(1):54.e1-5.

3693. Vestergaard M, Basso O, Henriksen TB, Ostergaard J, Secher NJ, Olsen J. Pre-eclampsia and febrile convulsions. *Arch Dis Child*. 2003 Aug;88(8):726-7.

3694. Vettori DV, Rohde LE, Clausell N. Asymptomatic left ventricular dysfunction in puerperal women: An echocardiographic-based study. *International Journal of Cardiology*. 2011 16 Jun;149(3):353-7.

3695. Veyna RS, Seyfried D, Burke DG, Zimmerman C, Mlynarek M, Nichols V, et al. Magnesium sulfate therapy after aneurysmal subarachnoid hemorrhage. *Journal of Neurosurgery*. 2002;96(3):510-4.

3696. Vickers M, Ford I, Morrison R, Prescott G, Watson S, Hannaford P, et al. Markers of endothelial activation and atherothrombosis in women with history of preeclampsia or gestational hypertension. *Thromb Haemost*. 2003 Dec;90(6):1192-7.
3697. Vieira AA, David BBL, Lino RRG, Duarte LB, Bueno AC. Evaluation of perinatal factors that influence the incidence of necrotizing enterocolitis in very low birth weight infants  
Avaliacao dos fatores perinatais que interferem na incidencia de enterocolite necrosante em recém-nascidos de muito baixo peso. *Revista Brasileira de Ginecologia e Obstetricia*. 2013 August;35(8):363-7.
3698. Vigil-De Gracia P. Acute fatty liver and HELLP syndrome: two distinct pregnancy disorders. *International journal of gynaecology and obstetrics: the official organ of the International Federation of Gynaecology and Obstetrics*. 2001 Jun;73(3):215-20.
3699. Vigil-De Gracia P. Pregnancy complicated by pre-eclampsia-eclampsia with HELLP syndrome. *International journal of gynaecology and obstetrics: the official organ of the International Federation of Gynaecology and Obstetrics*. 2001 Jan;72(1):17-23.
3700. Vigil-De Gracia P, Lasso M, Montufar-Rueda C. Perinatal outcome in women with severe chronic hypertension during the second half of pregnancy. *International journal of gynaecology and obstetrics: the official organ of the International Federation of Gynaecology and Obstetrics*. 2004 May;85(2):139-44.
3701. Vigil-De Gracia P, Montufar-Rueda C, Ruiz J. Expectant management of severe preeclampsia and preeclampsia superimposed on chronic hypertension between 24 and 34 weeks' gestation. *European journal of obstetrics, gynecology, and reproductive biology*. 2003 Mar 26;107(1):24-7.
3702. Vigil-De Gracia P, Silva S, Montufar C, Carrol I, De Los Rios S. Anesthesia in pregnant women with HELLP syndrome. *International journal of gynaecology and obstetrics: the official organ of the International Federation of Gynaecology and Obstetrics*. 2001 Jul;74(1):23-7.
3703. Vigneau C, Lorcy N, Dolley-Hitze T, Jouan F, Arlot-Bonnemains Y, Laguerre B, et al. All anti-vascular endothelial growth factor drugs can induce 'pre-eclampsia-like syndrome': a RARE study. *Nephrology, dialysis, transplantation : official publication of the European Dialysis and Transplant Association - European Renal Association*. 2014 Feb;29(2):325-32.
3704. Vigod SN, Kurdyak PA, Dennis CL, Gruneir A, Newman A, Seeman MV, et al. Maternal and newborn outcomes among women with schizophrenia: a retrospective population-based cohort study. *Bjog*. 2014 Apr;121(5):566-74.
3705. Vikanes A, Grjibovski AM, Vangen S, Gunnes N, Samuelsen SO, Magnus P. Maternal body composition, smoking, and hyperemesis gravidarum. *Annals of epidemiology*. 2010 01 Aug;20(8):592-8.
3706. Vikanes A, Skjaerven R, Grjibovski AM, Gunnes N, Vangen S, Magnus P. Recurrence of hyperemesis gravidarum across generations: Population based cohort study. *BMJ (Online)*. 2010 15 May;340(7755):1071.
3707. Vikanes TV, Stoer NC, Magnus P, Grjibovski AM. Hyperemesis gravidarum and pregnancy outcomes in the Norwegian mother and child cohort - a cohort study. *BMC pregnancy and childbirth*. 2013 03 Sep;13(169).
3708. Vikse BE, Irgens LM, Bostad L, Iversen BM. Adverse perinatal outcome and later kidney biopsy in the mother. *Journal of the American Society of Nephrology : JASN*. 2006 Mar;17(3):837-45.
3709. Vikse BE, Irgens LM, Karumanchi SA, Thadhani R, Reisaeter AV, Skjaerven R. Familial factors in the association between preeclampsia and later ESRD. *Clinical journal of the American Society of Nephrology : CJASN*. 2012 Nov;7(11):1819-26.
3710. Vikse BE, Irgens LM, Leivestad T, Hallan S, Iversen BM. Low birth weight increases risk for end-stage renal disease. *Journal of the American Society of Nephrology*. 2008 January;19(1):151-7.
3711. Vikse BE, Irgens LM, Leivestad T, Skjaerven R, Iversen BM. Preeclampsia and the risk of end-stage renal disease. *N Engl J Med*. 2008 Aug 21;359(8):800-9.

3712. Villa PM, Hamalainen E, Maki A, Raikkonen K, Pesonen AK, Taipale P, et al. Vasoactive agents for the prediction of early- and late-onset preeclampsia in a high-risk cohort. *BMC pregnancy and childbirth*. 2013 12 May;13(110).
3713. Villar J, Purwar M, Merialdi M, Zavaleta N, Thi Nhu Ngoc N, Anthony J, et al. World Health Organisation multicentre randomised trial of supplementation with vitamins C and e among pregnant women at high risk for pre-eclampsia in populations of low nutritional status from developing countries. *BJOG: An International Journal of Obstetrics and Gynaecology*. 2009 May;116(6):780-8.
3714. Vilmi-Kerala T, Palomaki O, Vainio M, Uotila J, Palomaki A. The risk of metabolic syndrome after gestational diabetes mellitus - A hospital-based cohort study. *Diabetology and Metabolic Syndrome*. 2015 12 May;7(1).
3715. Vink J, Hickey K, Ghidini A, Deering S, Mora A, Poggi S. Earlier gestational age at ultrasound evaluation predicts adverse neonatal outcomes in the preterm appropriate-for-gestational-age fetus with idiopathic oligohydramnios. *Am J Perinatol*. 2009 Jan;26(1):21-5.
3716. Vinnars MT, Nasiell J, Ghazi S, Westgren M, Papadogiannakis N. The severity of clinical manifestations in preeclampsia correlates with the amount of placental infarction. *Acta Obstet Gynecol Scand*. 2011 Jan;90(1):19-25.
3717. Vinnars MT, Nasiell J, Holmstrom G, Norman M, Westgren M, Papadogiannakis N. Association between placental pathology and neonatal outcome in preeclampsia: a large cohort study. *Hypertension in pregnancy*. 2014 May;33(2):145-58.
3718. Vinograd A, Wainstock T, Mazor M, Mastrolia SA, Beer-Weisel R, Klaitman V, et al. A prior placenta accreta is an independent risk factor for post-partum hemorrhage in subsequent gestations. *European Journal of Obstetrics Gynecology and Reproductive Biology*. 2015 01 Apr;187:20-4.
3719. Vinturache A, Moledina N, McDonald S, Slater D, Tough S. Pre-pregnancy Body Mass Index (BMI) and delivery outcomes in a Canadian population. *BMC pregnancy and childbirth*. 2014 December 20;14(1).
3720. Virk J, Hsu P, Olsen J. Socio-demographic characteristics of women sustaining injuries during pregnancy: A study from the Danish National Birth Cohort. *BMJ Open*. 2012;2(4).
3721. Virkus RA, Lokkegaard E, Lidegaard O, Langhoff-Roos J, Nielsen AK, Rothman KJ, et al. Risk factors for venous thromboembolism in 1.3 million pregnancies: A nationwide prospective cohort. *PLoS one*. 2014 02 May;9(5).
3722. Visser S, Hermes W, Ket JCF, Otten RHJ, Van Pampus MG, Bloemenkamp KWM, et al. Systematic review and metaanalysis on nonclassic cardiovascular biomarkers after hypertensive pregnancy disorders. *American Journal of Obstetrics and Gynecology*. 2014 01 Oct;211(4):373.e1-.e9.
3723. Visvalingam G, Purandare N, Cooley S, Roopnarinesingh R, Geary M. Perinatal outcome after ultrasound diagnosis of anhydramnios at term. *Journal of obstetrics and gynaecology : the journal of the Institute of Obstetrics and Gynaecology*. 2012 Jan;32(1):50-3.
3724. Vlastos EJ, Tomlinson TM, Bildirici I, Sreenarasimhaiah S, Yusuf K, Sadovsky Y, et al. Fetal heart rate accelerations and the risk of cerebral lesions and poor neurodevelopmental outcome in very low birthweight neonates. *Am J Perinatol*. 2007 Feb;24(2):83-8.
3725. Vohr BR, Allan W, Katz KH, Schneider KC, Ment LR. Early predictors of hypertension in prematurely born adolescents. *Acta paediatrica (Oslo, Norway : 1992)*. 2010 Dec;99(12):1812-8.
3726. Voigt M, Straube S, Zygmunt M, Krafczyk B, Schneider KTM, Briese V. Obesity and pregnancy - A risk profile. *Zeitschrift fur Geburtshilfe und Neonatologie*. 2008 December;212(6):201-5.
3727. Voigt M, Zygmunt M, Henrich W, Straube S, Carstensen M, Briese V. Analysis of subgroup of pregnant women in Germany 16th communication: Morbid obesity: Pregnancy risks, birth risks and status of the newborn. *Geburtshilfe und Frauenheilkunde*. 2008 August;68(8):794-800.
3728. Volkmer BG, Seidl EM, Gschwend JE, de Petriconi R, Bach D, Kleinschmidt K. Pregnancy in women with ureterosigmoidostomy. *Urology*. 2002 Dec;60(6):979-82.

3729. Vollebregt KC, Boer K, Van Der Post JA, Wolf H. Association of three different techniques to measure blood pressure in the first trimester with the development of hypertensive disorders of pregnancy. *Acta Obstet Gynecol Scand*. 2013 Jan;92(1):53-60.
3730. Vollebregt KC, Gisolf J, Guelen I, Boer K, van Montfrans G, Wolf H. Limited accuracy of the hyperbaric index, ambulatory blood pressure and sphygmomanometry measurements in predicting gestational hypertension and preeclampsia. *J Hypertens*. 2010 Jan;28(1):127-34.
3731. Vollebregt KC, Van Der Wal MF, Wolf H, Vrijkotte TGM, Boer K, Bonsel GJ. Is psychosocial stress in first ongoing pregnancies associated with pre-eclampsia and gestational hypertension? *BJOG: An International Journal of Obstetrics and Gynaecology*. 2008 April;115(5):607-15.
3732. Vollebregt KC, Wolf H, Boer K, van der Wal MF, Vrijkotte TG, Bonsel GJ. Does physical activity in leisure time early in pregnancy reduce the incidence of preeclampsia or gestational hypertension? *Acta Obstet Gynecol Scand*. 2010;89(2):261-7.
3733. Voller SB, Chock S, Ernst LM, Su E, Liu X, Farrow KN, et al. Cord blood biomarkers of vascular endothelial growth (VEGF and sFlt-1) and postnatal growth: A preterm birth cohort study. *Early Human Development*. 2014 April;90(4):195-200.
3734. Vollmar B, Bauer C, Menger MD. n-3 Polyunsaturated fatty acid-enriched diet does not protect from liver injury but attenuates mortality rate in a rat model of systemic endotoxemia. *Crit Care Med*. 2002 May;30(5):1091-8.
3735. von Dadelszen P, Magee LA, Devarakonda RM, Hamilton T, Ainsworth LM, Yin R, et al. The prediction of adverse maternal outcomes in preeclampsia. *Journal of obstetrics and gynaecology Canada : JOGC = Journal d'obstetrique et gynecologie du Canada : JOGC*. 2004 Oct;26(10):871-9.
3736. von Dadelszen P, Magee LA, Kraiden M, Alasaly K, Popovska V, Devarakonda RM, et al. Levels of antibodies against cytomegalovirus and *Chlamydia pneumoniae* are increased in early onset pre-eclampsia. *Bjog*. 2003 Aug;110(8):725-30.
3737. von Dadelszen P, Menzies JM, Payne B, Magee LA. Predicting adverse outcomes in women with severe pre-eclampsia. *Semin Perinatol*. 2009 Jun;33(3):152-7.
3738. von Dadelszen P, Payne B, Li J, Ansermino JM, Broughton Pipkin F, Cote AM, et al. Prediction of adverse maternal outcomes in pre-eclampsia: development and validation of the fullPIERS model. *Lancet*. 2011 Jan 15;377(9761):219-27.
3739. Von Dadelszen P, Sawchuck D, McMaster R, Douglas MJ, Lee SK, Saunders S, et al. The active implementation of pregnancy hypertension guidelines in British Columbia. *Obstetrics and Gynecology*. 2010 September;116(3):659-66.
3740. Von Schmidt Auf Altenstadt JF, Hukkelhoven CWPM, Van Roosmalen J, Bloemenkamp KWM. Pre-eclampsia increases the risk of postpartum haemorrhage: A nationwide cohort study in The Netherlands. *PloS one*. 2013 18 Dec;8(12).
3741. Vormittag R, Pabinger I. Thrombophilia and pregnancy complications. *Hamostaseologie*. 2006 Jan;26(1):59-62.
3742. Voss A, Baumert M, Baier V, Stepan H, Walther T, Faber R. Autonomic cardiovascular control in pregnancies with abnormal uterine perfusion. *American journal of hypertension*. 2006 Mar;19(3):306-12.
3743. Vossbeck S, De Camargo OK, Grab D, Bode H, Pohlandt F. Neonatal and neurodevelopmental outcome in infants born before 30 weeks of gestation with absent or reversed end-diastolic flow velocities in the umbilical artery. *European Journal of Pediatrics*. 2001;160(2):128-34.
3744. Vreeburg SA, Jacobs DJ, Dekker GA, Heard AR, Priest KR, Chan A. Hypertension during pregnancy in South Australia, Part 2: Risk factors for adverse maternal and/or perinatal outcome - Results of multivariable analysis. *Australian and New Zealand Journal of Obstetrics and Gynaecology*. 2004 October;44(5):410-8.
3745. Vricella LK, Louis JM, Mercer BM, Bolden N. Epidural-associated hypotension is more common



among severely preeclamptic patients in labor. *Am J Obstet Gynecol.* 2012 Oct;207(4):335.e1-7.

3746. Vrijkotte TG, Krukziener N, Hutten BA, Vollebregt KC, van Eijdsden M, Twickler MB. Maternal lipid profile during early pregnancy and pregnancy complications and outcomes: the ABCD study. *The Journal of clinical endocrinology and metabolism.* 2012 Nov;97(11):3917-25.

3747. Wacker J, Fruhauf J, Schulz M, Chiwora FM, Volz J, Becker K. Riboflavin deficiency and preeclampsia. *Obstet Gynecol.* 2000 Jul;96(1):38-44.

3748. Wada Y, Sakamaki Y, Kobayashi D, Ajiro J, Moro H, Murakami S, et al. HELLP syndrome, multiple liver infarctions, and intrauterine fetal death in a patient with systemic lupus erythematosus and antiphospholipid syndrome. *Internal Medicine.* 2009;48(17):1555-8.

3749. Wadhawan R, Vohr BR, Fanaroff AA, Perritt RL, Duara S, Stoll BJ, et al. Does labor influence neonatal and neurodevelopmental outcomes of extremely-low-birth-weight infants who are born by cesarean delivery? *Am J Obstet Gynecol.* 2003 Aug;189(2):501-6.

3750. Wadhvani N, Patil V, Pisal H, Joshi A, Mehendale S, Gupte S, et al. Altered maternal proportions of long chain polyunsaturated fatty acids and their transport leads to disturbed fetal stores in preeclampsia. Prostaglandins, leukotrienes, and essential fatty acids. 2014 Jul-Aug;91(1-2):21-30.

3751. Wafa EW, Refaie AF, Abbas TM, Fouda MA, Sheashaa HA, Mostafa A, et al. End-stage renal disease among living-kidney donors: Single-center experience. *Experimental and Clinical Transplantation.* 2011 February;9(1):14-9.

3752. Wagner SJ, Acquah LA, Lindell EP, Craici IM, Wingo MT, Rose CH, et al. Posterior reversible encephalopathy syndrome and eclampsia: pressing the case for more aggressive blood pressure control. *Mayo Clin Proc.* 2011 Sep;86(9):851-6.

3753. Wahabi HA, Esmaeil SA, Fayed A, Al-Shaikh G, Alzeidan RA. Pre-existing diabetes mellitus and adverse pregnancy outcomes. *BMC Res Notes.* 2012;5:496.

3754. Wahabi HA, Fayed AA, Alzeidan RA, Mandil AA. The independent effects of maternal obesity and gestational diabetes on the pregnancy outcomes. *BMC endocrine disorders.* 2014;14:47.

3755. Wahaidi VY, Kowolik MJ, Eckert GJ, Galli DM. Endotoxemia and the host systemic response during experimental gingivitis. *J Clin Periodontol.* 2011 May;38(5):412-7.

3756. Waheed G, Toheer R, Jamil S, Mansha M, Ayub TB. Maternal risk factors among pregnant internally displaced person women in Mardan, Pakistan. *Pakistan Journal of Medical and Health Sciences.* 2013 July-September;7(3):609-13.

3757. Walfisch A, Hallak M, Mazor M. Individualized risk assessment for adverse pregnancy outcome by uterine artery Doppler at 23 weeks. *Obstetrics and Gynecology.* 2001;98(3):369-73.

3758. Walker MC, Finkelstein SA, Rennicks White R, Shachkina S, Smith GN, Wen SW, et al. The Ottawa and Kingston (OaK) Birth Cohort: development and achievements. *Journal of obstetrics and gynaecology Canada : JOGC = Journal d'obstetrique et gynecologie du Canada : JOGC.* 2011 Nov;33(11):1124-33.

3759. Walker MC, Murphy KE, Pan S, Yang Q, Wen SW. Adverse maternal outcomes in multifetal pregnancies. *Bjog.* 2004 Nov;111(11):1294-6.

3760. Walker MG, Fitzgerald B, Keating S, Ray JG, Windrim R, Kingdom JC. Sex-specific basis of severe placental dysfunction leading to extreme preterm delivery. *Placenta.* 2012 Jul;33(7):568-71.

3761. Walker MG, Hindmarsh PC, Geary M, Kingdom JC. Sonographic maturation of the placenta at 30 to 34 weeks is not associated with second trimester markers of placental insufficiency in low-risk pregnancies. *Journal of obstetrics and gynaecology Canada : JOGC = Journal d'obstetrique et gynecologie du Canada : JOGC.* 2010 Dec;32(12):1134-9.

3762. Walker MG, Windrim C, Ellul KN, Kingdom JC. Web-based education for placental complications of pregnancy. *Journal of obstetrics and gynaecology Canada : JOGC = Journal d'obstetrique et gynecologie du Canada : JOGC.* 2013 Apr;35(4):334-9.

3763. Walker SP, Ewan-Whyte C, Chang SM, Powell CA, Fletcher H, McDonald D, et al. Factors associated with size and proportionality at birth in term Jamaican infants. *Journal of health, population,*

and nutrition. 2003 Jun;21(2):117-26.

3764. Wallace EM, Schneider-Kolsky ME, Edwards A, Baker L, Jenkin G. Maternal serum activin A levels in association with intrauterine fetal growth restriction. *Bjog*. 2003 Mar;110(3):306-10.

3765. Wallace JM, Bhattacharya S, Campbell DM, Horgan GW. Inter-pregnancy weight change impacts placental weight and is associated with the risk of adverse pregnancy outcomes in the second pregnancy. *BMC pregnancy and childbirth*. 2014;14:40.

3766. Wallace JM, Horgan GW, Bhattacharya S. Placental weight and efficiency in relation to maternal body mass index and the risk of pregnancy complications in women delivering singleton babies. *Placenta*. 2012 Aug;33(8):611-8.

3767. Wandabwa JN, Doyle P, Longo-Mbenza B, Kiondo P, Khainza B, Othieno E, et al. Human immunodeficiency virus and AIDS and other important predictors of maternal mortality in Mulago Hospital Complex Kampala Uganda. *BMC public health*. 2011;11:565.

3768. Waness A, Al Sayyari A, Salih SB, Al Shohaib S. Increased risk of hypertension, proteinuria and preeclampsia in pregnant Saudi females with IgA nephropathy. *Hypertension in pregnancy*. 2010;29(4):385-9.

3769. Wang CN, Chang SD, Peng HH, Lee YS, Chang YL, Cheng PJ, et al. Change in amniotic fluid levels of multiple anti-angiogenic proteins before development of preeclampsia and intrauterine growth restriction. *The Journal of clinical endocrinology and metabolism*. 2010 Mar;95(3):1431-41.

3770. Wang CN, Chen JY, Chao AS, Cheng PJ, Chang SD, Wang TH. Early anti-angiogenic proteins expression in amniotic fluid of twin fetuses. *Twin Res Hum Genet*. 2011 Oct;14(5):452-6.

3771. Wang CN, Chen JYS, Sabu S, Chang YL, Chang SD, Kao CC, et al. Elevated amniotic fluid F2-isoprostane: A potential predictive marker for preeclampsia. *Free Radical Biology and Medicine*. 2011 01 May;50(9):1124-30.

3772. Wang CP, Tan WC, Kanagalingam D, Tan HK. Why we do caesars: a comparison of the trends in caesarean section delivery over a decade. *Ann Acad Med Singapore*. 2013 Aug;42(8):408-12.

3773. Wang IK, Chang SN, Liao CC, Liang CC, Chang CT, Lin HH, et al. Hypertensive disorders in pregnancy and preterm delivery and subsequent stroke in Asian women: A retrospective cohort study. *Stroke*. 2011 March;42(3):716-21.

3774. Wang IK, Muo CH, Chang YC, Liang CC, Chang CT, Lin SY, et al. Association between hypertensive disorders during pregnancy and end-stage renal disease: a population-based study. *Cmaj*. 2013 Feb 19;185(3):207-13.

3775. Wang P, Lu MC, Yan YH. Abnormal glucose tolerance is associated with preterm labor and increased neonatal complications in Taiwanese women. *Taiwanese journal of obstetrics & gynecology*. 2013 Dec;52(4):479-84.

3776. Wang S, Qiao FY, Feng L. High leptin level and leptin receptor Lys656Asn variant are risk factors for preeclampsia. *Genetics and Molecular Research*. 2013 04 Apr;12(3):2416-22.

3777. Wang Y, Lewis DF, Adair CD, Gu Y, Mason L, Kipikasa JH. Digibind attenuates cytokine TNFalpha-induced endothelial inflammatory response: potential benefit role of digibind in preeclampsia. *Journal of perinatology : official journal of the California Perinatal Association*. 2009 Mar;29(3):195-200.

3778. Wang Y, Tanbo T, Ellingsen L, Abyholm T, Henriksen T. Effect of pregestational maternal, obstetric and perinatal factors on neonatal outcome in extreme prematurity. *Archives of Gynecology and Obstetrics*. 2011 December;284(6):1381-7.

3779. Wang Z, Wang P, Liu H, He X, Zhang J, Yan H, et al. Maternal adiposity as an independent risk factor for pre-eclampsia: a meta-analysis of prospective cohort studies. *Obesity reviews : an official journal of the International Association for the Study of Obesity*. 2013 Jun;14(6):508-21.

3780. Wanyonyi SZ, Karuga RN. The utility of clinical care pathways in determining perinatal outcomes for women with one previous caesarean section; a retrospective service evaluation. *BMC pregnancy and childbirth*. 2010;10:62.

3781. Warner B, Musial MJ, Chenier T, Donovan E. The Effect of Birth Hospital Type on the Outcome of Very Low Birth Weight Infants. *Pediatrics*. 2004 January;113(1 I):35-41.
3782. Warren JE, Simonsen SE, Branch DW, Porter TF, Silver RM. Thromboprophylaxis and pregnancy outcomes in asymptomatic women with inherited thrombophilias. *American Journal of Obstetrics and Gynecology*. 2009 March;200(3):281.e1-.e5.
3783. Wassan K, Rani S, Haider G. Perinatal mortality - A hazardous dilemma. *Rawal Medical Journal*. 2009 July -;34(2):195-8.
3784. Wataganara T, Boriboonhirunsarn D, Titapant V, Kanokpongsakdi S, Sunsaneevithayakul P, Vantanasiri C. Maternal body mass index at term does not predict the severity of preeclampsia. *Journal of the Medical Association of Thailand = Chotmaihet thangphaet*. 2008 Aug;91(8):1166-71.
3785. Watanabe N, Bokuda K, Fujiwara T, Suzuki T, Mito A, Morimoto S, et al. Soluble (pro)renin receptor and blood pressure during pregnancy: a prospective cohort study. *Hypertension*. 2012 Nov;60(5):1250-6.
3786. Waterstone M, Wolfe C, Hooper R, Bewley S. Postnatal morbidity after childbirth and severe obstetric morbidity. *BJOG: An International Journal of Obstetrics and Gynaecology*. 2003 01 Feb;110(2):128-33.
3787. Wathen KA, Ylikorkala O, Andersson S, Alfthan H, Stenman UH, Vuorela P. Maternal serum endostatin at gestational weeks 16-20 is elevated in subsequent pre-eclampsia but not in intrauterine growth retardation. *Acta Obstet Gynecol Scand*. 2009;88(5):593-8.
3788. Watorek E, Boratynska M, Smolska D, Patrzalek D, Klinger M. Malignancy after renal transplantation in the new era of immunosuppression. *Annals of Transplantation*. 2011;16(2):14-8.
3789. Waugh J, Bell SC, Kilby MD, Lambert P, Shennan A, Halligan A. Urine protein estimation in hypertensive pregnancy: which thresholds and laboratory assay best predict clinical outcome? *Hypertension in pregnancy*. 2005;24(3):291-302.
3790. Wax JR, Lopes AM, Benn PA, Lerer T, Steinfeld JD, Ingardia CJ. Unexplained elevated midtrimester maternal serum levels of alpha fetoprotein, human chorionic gonadotropin, or low unconjugated estriol: recurrence risk and association with adverse perinatal outcome. *The Journal of maternal-fetal medicine*. 2000 May-Jun;9(3):161-4.
3791. Webster GJ, Kurtovic J, Lowe SA, Riordan SM. Hepatic ischemia associated with coarctation of the aorta in pregnancy: key issues in differential diagnosis. *Obstet Gynecol*. 2004 Nov;104(5 Pt 2):1151-4.
3792. Weed S, Bastek JA, Anton L, Elovitz MA, Parry S, Srinivas SK. Examining the correlation between placental and serum placenta growth factor in preeclampsia. *Am J Obstet Gynecol*. 2012 Aug;207(2):140.e1-6.
3793. Weerasekera DS, Peiris H. The significance of serum uric acid, creatinine and urinary microprotein levels in predicting pre-eclampsia. *Journal of Obstetrics and Gynaecology*. 2003 January;23(1):17-9.
3794. Wei BJ, Chen YJ, Yu L, Wu B. Periodontal disease and risk of preeclampsia: a meta-analysis of observational studies. *PloS one*. 2013;8(8):e70901.
3795. Wei PL, Keller JJ, Liang HH, Lin HC. Acute appendicitis and adverse pregnancy outcomes: a nationwide population-based study. *Journal of gastrointestinal surgery : official journal of the Society for Surgery of the Alimentary Tract*. 2012 Jun;16(6):1204-11.
3796. Wei Q, Zhang W, Chen M, Zhang L, He G, Liu X. Peripartum hysterectomy in 38 hospitals in China: a population-based study. *Arch Gynecol Obstet*. 2014 Mar;289(3):549-53.
3797. Wei SQ, Audibert F, Hidiroglou N, Sarafin K, Julien P, Wu Y, et al. Longitudinal vitamin D status in pregnancy and the risk of pre-eclampsia. *Bjog*. 2012 Jun;119(7):832-9.
3798. Wei SQ, Audibert F, Luo ZC, Nuyt AM, Masse B, Julien P, et al. Maternal plasma 25-hydroxyvitamin D levels, angiogenic factors, and preeclampsia. *Am J Obstet Gynecol*. 2013

May;208(5):390.e1-6.

3799. Weiler J, Tong S, Palmer KR. Is fetal growth restriction associated with a more severe maternal phenotype in the setting of early onset pre-eclampsia? A retrospective study. *PloS one*. 2011;6(10):e26937.

3800. Weinert LS, Reichelt AJ, Schmitt LR, Boff R, Oppermann ML, Camargo JL, et al. Serum vitamin D insufficiency is related to blood pressure in diabetic pregnancy. *American journal of hypertension*. 2014 Oct;27(10):1316-20.

3801. Weiss JL, Malone FD, Emig D, Ball RH, Nyberg DA, Comstock CH, et al. Obesity, obstetric complications and cesarean delivery rate - A population-based screening study. *American Journal of Obstetrics and Gynecology*. 2004 April;190(4):1091-7.

3802. Weiss JL, Malone FD, Vidaver J, Ball RH, Nyberg DA, Comstock CH, et al. Threatened abortion: A risk factor for poor pregnancy outcome, a population-based screening study. *American Journal of Obstetrics and Gynecology*. 2004 March;190(3):745-50.

3803. Weissgerber TL, Davies GA, Roberts JM. Modification of angiogenic factors by regular and acute exercise during pregnancy. *Journal of applied physiology (Bethesda, Md : 1985)*. 2010 May;108(5):1217-23.

3804. Weissgerber TL, Gandley RE, McGee PL, Spong CY, Myatt L, Leveno KJ, et al. Haptoglobin Phenotype, Preeclampsia Risk and the Efficacy of Vitamin C and E Supplementation to Prevent Preeclampsia in a Racially Diverse Population. *PloS one*. 2013 03 Apr;8(4).

3805. Weissgerber TL, McGee PL, Myatt L, Hauth JC, Varner MW, Wapner RJ, et al. Haptoglobin phenotype and abnormal uterine artery Doppler in a racially diverse cohort. *Journal of Maternal-Fetal and Neonatal Medicine*. 2014 01 Nov;27(17):1728-33.

3806. Weissgerber TL, Roberts JM, Jeyabalan A, Powers RW, Lee M, Datwyler SA, et al. Haptoglobin phenotype, angiogenic factors, and preeclampsia risk. *Am J Obstet Gynecol*. 2012 Apr;206(4):358.e10-8.

3807. Weissgerber TL, Wolfe LA, Davies GAL. The role of regular physical activity in preeclampsia prevention. *Medicine and Science in Sports and Exercise*. 2004 December;36(12):2024-31.

3808. Weisz DE, Shivananda S, Asztalos E, Yee W, Synnes A, Lee SK, et al. Intrapartum magnesium sulfate and need for intensive delivery room resuscitation. *Archives of Disease in Childhood: Fetal and Neonatal Edition*. 2014 01 Jan;100(1):F59-F65.

3809. Wellington K, Mulla ZD. Seasonal trend in the occurrence of preeclampsia and eclampsia in Texas. *American journal of hypertension*. 2012 Jan;25(1):115-9.

3810. Wen S, Tan H, Xie R, Smith GN, Walker M. A pre-conception cohort to study preeclampsia in China: Rationale, study design, and preliminary results. *Zhong nan da xue xue bao Yi xue ban = Journal of Central South University Medical sciences*. 2012 Nov;37(11):1081-7.

3811. Wen SW, Chen XK, Rodger M, White RR, Yang Q, Smith GN, et al. Folic acid supplementation in early second trimester and the risk of preeclampsia. *Am J Obstet Gynecol*. 2008 Jan;198(1):45.e1-7.

3812. Wen SW, Demissie K, Yang Q, Walker MC. Maternal morbidity and obstetric complications in triplet pregnancies and quadruplet and higher-order multiple pregnancies. *Am J Obstet Gynecol*. 2004 Jul;191(1):254-8.

3813. Wen SW, Huang L, Liston R, Heaman M, Baskett T, Rusen ID, et al. Severe maternal morbidity in Canada, 1991-2001. *Cmaj*. 2005 Sep 27;173(7):759-64.

3814. Wen SW, Tan H, Yang Q, Walker M. Prediction of intra-twin birth weight discordance by binary logistic regression analysis. *Gynecol Obstet Invest*. 2006;62(4):186-92.

3815. Wen SW, Xie RH, Tan H, Walker MC, Smith GN, Retnakaran R. Preeclampsia and gestational diabetes mellitus: Pre-conception origins? *Medical Hypotheses*. 2012 July;79(1):120-5.

3816. Wen SW, Zhou J, Yang Q, Fraser W, Olatunbosun O, Walker M. Maternal exposure to folic acid antagonists and placenta-mediated adverse pregnancy outcomes. *Cmaj*. 2008 Dec 2;179(12):1263-8.

3817. Wen X, Triche EW, Hogan JW, Shenassa ED, Buka SL. Prenatal factors for childhood blood

- pressure mediated by intrauterine and/or childhood growth? *Pediatrics*. 2011 Mar;127(3):e713-21.
3818. Wenckus DJ, Gao W, Kominiarek MA, Wilkins I. The effects of labor and delivery on maternal and neonatal outcomes in term twins: A retrospective cohort study. *BJOG: An International Journal of Obstetrics and Gynaecology*. 2014 August;121(9):1137-44.
3819. Wender-Ozegowska E, Zawiejska A, Iciek R, Brazert J. Concentrations of eNOS, VEGF, ACE and PlGF in maternal blood as predictors of impaired fetal growth in pregnancy complicated by gestational hypertension/preeclampsia. *Hypertension in pregnancy*. 2015 01 Feb;34(1):17-23.
3820. Wendland EM, Torloni MR, Falavigna M, Trujillo J, Dode MA, Campos MA, et al. Gestational diabetes and pregnancy outcomes--a systematic review of the World Health Organization (WHO) and the International Association of Diabetes in Pregnancy Study Groups (IADPSG) diagnostic criteria. *BMC pregnancy and childbirth*. 2012;12:23.
3821. Wendland EM, Torloni MR, Falavigna M, Trujillo J, Dode MA, Campos MA, et al. Gestational diabetes and pregnancy outcomes - a systematic review of the World Health Organization (WHO) and the International Association of Diabetes in Pregnancy Study Groups (IADPSG) diagnostic criteria. *BMC pregnancy and childbirth*. 2012 31 Mar;12(23).
3822. Wenger NK. Recognizing pregnancy-associated cardiovascular risk factors. *American Journal of Cardiology*. 2014 15 Jan;113(2):406-9.
3823. Werder E, Mendola P, Mannisto T, O'Loughlin J, Laughon SK. Effect of maternal chronic disease on obstetric complications in twin pregnancies in a United States cohort. *Fertility and sterility*. 2013 Jul;100(1):142-9.e1-2.
3824. Werner EF, Funai EF, Pettker CM, Henderson J, Zuckerwise L, Thung SF, et al. Screening for gestational diabetes mellitus: Are the criteria proposed by the International Association of the Diabetes and Pregnancy Study Groups cost-effective? *Diabetes Care*. 2012 March;35(3):529-35.
3825. West J, Wright J, Tuffnell D, Jankowicz D, West R. Do clinical trials improve quality of care? A comparison of clinical processes and outcomes in patients in a clinical trial and similar patients outside a trial where both groups are managed according to a strict protocol. *Quality and Safety in Health Care*. 2005 June;14(3):175-8.
3826. Westbrook RH, Yeoman AD, Joshi D, Heaton ND, Quaglia A, O'Grady JG, et al. Outcomes of severe pregnancy-related liver disease: refining the role of transplantation. *American journal of transplantation : official journal of the American Society of Transplantation and the American Society of Transplant Surgeons*. 2010 Nov;10(11):2520-6.
3827. Westphal M, Stubbe H, Sielenkamper AW, Borgulya R, Van Aken H, Ball C, et al. Terlipressin dose response in healthy and endotoxemic sheep: impact on cardiopulmonary performance and global oxygen transport. *Intensive care medicine*. 2003 Feb;29(2):301-8.
3828. Wetta LA, Biggio JR, Cliver S, Abramovici A, Barnes S, Tita AT. Is midtrimester vitamin D status associated with spontaneous preterm birth and preeclampsia? *Am J Perinatol*. 2014 Jun;31(6):541-6.
3829. Wheeler TL, 2nd, Blackhurst DW, Dellinger EH, Ramsey PS. Usage of spot urine protein to creatinine ratios in the evaluation of preeclampsia. *Am J Obstet Gynecol*. 2007 May;196(5):465.e1-4.
3830. Whitecar PW, Boggess KA, McMahon MJ, Thorp JM, Jr., Taylor DD. Altered expression of TCR-CD3zeta induced by sera from women with preeclampsia. *Am J Obstet Gynecol*. 2001 Oct;185(4):812-8.
3831. Whitehead E, Dodds L, Joseph KS, Gordon KE, Wood E, Allen AC, et al. Relation of pregnancy and neonatal factors to subsequent development of childhood epilepsy: a population-based cohort study. *Pediatrics*. 2006 Apr;117(4):1298-306.
3832. Whitehouse AJ, Robinson M, Newnham JP, Pennell CE. Do hypertensive diseases of pregnancy disrupt neurocognitive development in offspring? *Paediatric and perinatal epidemiology*. 2012 Mar;26(2):101-8.
3833. Whitelaw DA, Hall D, Kotze T. Pregnancy in systemic lupus erythematosus: a retrospective study

from a developing community. *Clin Rheumatol*. 2008 May;27(5):577-80.

3834. Whiteman VE, August EM, Mogos M, Naik E, Garba M, Sanchez E, et al. Preterm birth in the first pregnancy and risk of neonatal death in the second pregnancy: A propensity score-weighted matching approach. *Journal of Obstetrics and Gynaecology*. 2015 01 Jan;35(1):30-6.

3835. Wibowo N, Purwosunu Y, Sekizawa A, Farina A, Idriansyah L, Fitriana I. Antioxidant supplementation in pregnant women with low antioxidant status. *Journal of Obstetrics and Gynaecology Research*. 2012 September;38(9):1152-61.

3836. Wiedemann A, Vocke F, Fitzgerald JS, Markert UR, Jeschke U, Lohse P, et al. Leptin gene (TTTC)(n) microsatellite polymorphism as well as leptin receptor R223Q and PPARgamma2 P12A substitutions are not associated with hypertensive disorders in pregnancy. *American journal of reproductive immunology (New York, NY : 1989)*. 2010 Apr 1;63(4):310-7.

3837. Wiedermann CJ, Kiechl S, Schratzberger P, Dunzendorfer S, Weiss G, Willeit J. The role of immune activation in endotoxin-induced atherogenesis. *Journal of endotoxin research*. 2001;7(4):322-6.

3838. Wieggersma JS, Droogh JM, Zijlstra JG, Fokkema J, Ligtenberg JJM. Quality of interhospital transport of the critically ill: Impact of a Mobile Intensive Care Unit with a specialized retrieval team. *Critical Care*. 2011 28 Feb;15(1).

3839. Wiegman MJ, de Groot JC, Jansonius NM, Aarnoudse JG, Groen H, Faas MM, et al. Long-term visual functioning after eclampsia. *Obstet Gynecol*. 2012 May;119(5):959-66.

3840. Wielgos M, Szpotanska-Sikorska M, Mazanowska N, Bomba-Opon D, Kociszewska-Najman B, Jabiry-Zieniewicz Z, et al. Pregnancy risk in female kidney and liver recipients: a retrospective comparative study. *The journal of maternal-fetal & neonatal medicine : the official journal of the European Association of Perinatal Medicine, the Federation of Asia and Oceania Perinatal Societies, the International Society of Perinatal Obstet*. 2012 Jul;25(7):1090-5.

3841. Wijdicks EFM, Manno EM, Fulgham JR, Giannini C. Cerebral angiitis mimicking posterior leukoencephalopathy. *Journal of Neurology*. 2003 01 Apr;250(4):444-8.

3842. Wijesiriwardana A, Shetty A, Smith N, Bhattacharya S. Obstetric outcome in women with threatened miscarriage in the first trimester. *Obstetrics and Gynecology*. 2006 March;107(3):557-62.

3843. Wikstrom AK, Cnattingius S, Stephansson O. Maternal use of Swedish snuff (snus) and risk of stillbirth. *Epidemiology (Cambridge, Mass)*. 2010 Nov;21(6):772-8.

3844. Wikstrom AK, Ekegren L, Karlsson M, Wikstrom J, Bergenheim M, Kerud H. Plasma levels of S100B during pregnancy in women developing pre-eclampsia. *Pregnancy Hypertension*. 2012 October;2(4):398-402.

3845. Wikstrom AK, Gunnarsdottir J, Cnattingius S. The paternal role in pre-eclampsia and giving birth to a small for gestational age infant; a population-based cohort study. *BMJ Open*. 2012;2(4).

3846. Wikstrom AK, Haglund B, Olovsson M, Lindeberg SN. The risk of maternal ischaemic heart disease after gestational hypertensive disease. *Bjog*. 2005 Nov;112(11):1486-91.

3847. Wikstrom AK, Stephansson O, Cnattingius S. Previous preeclampsia and risks of adverse outcomes in subsequent nonpreeclamptic pregnancies. *Am J Obstet Gynecol*. 2011 Feb;204(2):148.e1-6.

3848. Wikstrom AK, Svensson T, Kieler H, Cnattingius S. Recurrence of placental dysfunction disorders across generations. *Am J Obstet Gynecol*. 2011 Nov;205(5):454.e1-8.

3849. Wikstrom AK, Wikstrom J, Larsson A, Olovsson M. Random albumin/creatinine ratio for quantification of proteinuria in manifest pre-eclampsia. *Bjog*. 2006 Aug;113(8):930-4.

3850. Wikstrom Shemer E, Marschall HU, Ludvigsson JF, Stephansson O. Intrahepatic cholestasis of pregnancy and associated adverse pregnancy and fetal outcomes: a 12-year population-based cohort study. *Bjog*. 2013 May;120(6):717-23.

3851. Wikstrom Shemer EA, Thorsell M, Marschall HU, Kaijser M. Risks of emergency cesarean section and fetal asphyxia after induction of labor in intrahepatic cholestasis of pregnancy: a hospital-based retrospective cohort study. *Sexual & reproductive healthcare : official journal of the Swedish Association*

of Midwives. 2013 Mar;4(1):17-22.

3852. Wild J, Pateisky P, Kussel L, Huf W, Ott J, Haslinger P, et al. Preeclampsia-a risk factor for osteoporosis? Analysis of maternal Sclerostin levels and markers of bone turnover in patients with pre-eclampsia. *Hypertension in pregnancy*. 2014 August;33(3):333-40.

3853. Wiles KS, Bramham K, Vais A, Harding KR, Chowdhury P, Taylor CJ, et al. Pre-pregnancy counselling for women with chronic kidney disease: A retrospective analysis of nine years' experience. *BMC Nephrology*. 2015 01 Dec;16(1).

3854. Wiles NJ, Peters TJ, Leon DA, Lewis G. Birth weight and psychological distress at age 45-51 years: results from the Aberdeen Children of the 1950s cohort study. *The British journal of psychiatry : the journal of mental science*. 2005 Jul;187:21-8.

3855. Williams DM, Fraser A, Fraser WD, Hypponen E, Smith GD, Deanfield J, et al. Associations of maternal 25-hydroxyvitamin D in pregnancy with offspring cardiovascular risk factors in childhood and adolescence: Findings from the avon longitudinal study of parents and children. *Heart*. 2013 December;99(24):1849-56.

3856. Williams KP, Wilson S. The impact of parity on the incidence of HELLP syndrome and small for gestational age infants in hypertensive pregnant women. *Journal of obstetrics and gynaecology Canada : JOGC = Journal d'obstetrique et gynecologie du Canada : JOGC*. 2002 Jun;24(6):485-9.

3857. Williams MA, Frederick IO, Qiu C, Meryman LJ, King IB, Walsh SW, et al. Maternal erythrocyte omega-3 and omega-6 fatty acids, and plasma lipid concentrations, are associated with habitual dietary fish consumption in early pregnancy. *Clin Biochem*. 2006 Nov;39(11):1063-70.

3858. Williams MA, Miller RS, Qiu C, Cripe SM, Gelaye B, Enquobahrie D. Associations of early pregnancy sleep duration with trimester-specific blood pressures and hypertensive disorders in pregnancy. *Sleep*. 2010 Oct;33(10):1363-71.

3859. Williams MA, Peterlin BL, Gelaye B, Enquobahrie DA, Miller RS, Aurora SK. Trimester-specific blood pressure levels and hypertensive disorders among pregnant migraineurs. *Headache*. 2011 Nov-Dec;51(10):1468-82.

3860. Williams MA, Sanchez SE, Ananth CV, Hevner K, Qiu C, Enquobahrie DA. Maternal blood mitochondrial DNA copy number and placental abruption risk: Results from a preliminary study. *International Journal of Molecular Epidemiology and Genetics*. 2013;4(2):120-7.

3861. Williams MA, Woelk GB, King IB, Jenkins L, Mahomed K. Plasma carotenoids, retinol, tocopherols, and lipoproteins in preeclamptic and normotensive pregnant Zimbabwean women. *American journal of hypertension*. 2003 01 Aug;16(8):665-72.

3862. Williams NL, Wiegand S, McKenna DS. Wernicke's encephalopathy complicating pregnancy in a woman with neonatal necrotizing enterocolitis and resultant chronic malabsorption. *Am J Perinatol*. 2009 Aug;26(7):519-21.

3863. Williams PJ, Gumaa K, Scioscia M, Redman CW, Rademacher TW. Inositol phosphoglycan P-type in preeclampsia: A novel marker? *Hypertension*. 2007 January;49(1):84-9.

3864. Williams SF, Keane-Tarchichi MH, Bettica L, Dieudonne A, Bardeguet AD. Pregnancy outcomes in young women with perinatally acquired human immunodeficiency virus-1. *Am J Obstet Gynecol*. 2009 Feb;200(2):149.e1-5.

3865. Williamson CS. Nutrition in pregnancy. *Nutrition Bulletin*. 2006 March;31(1):28-59.

3866. Wilson BJ, Watson MS, Prescott GJ, Sunderland S, Campbell DM, Hannaford P, et al. Hypertensive diseases of pregnancy and risk of hypertension and stroke in later life: results from cohort study. *Bmj*. 2003 Apr 19;326(7394):845.

3867. Wilson KL, Casey BM, McIntire DD, Halvorson LM, Cunningham FG. Subclinical thyroid disease and the incidence of hypertension in pregnancy. *Obstetrics and Gynecology*. 2012 February;119(2 PART 1):315-20.

3868. Wilson NO, Ceesay FK, Hibbert JM, Driss A, Obed SA, Adjei AA, et al. Pregnancy outcomes among

- patients with sickle cell disease at Korle-Bu Teaching Hospital, Accra, Ghana: retrospective cohort study. *The American journal of tropical medicine and hygiene*. 2012 Jun;86(6):936-42.
3869. Wilson SG, White AD, Young AL, Davies MH, Pollard SG. The management of the surgical complications of HELLP syndrome. *Ann R Coll Surg Engl*. 2014 Oct;96(7):512-6.
3870. Wimalasundera RC, Larbalestier N, Smith JH, De Rooter A, Thom SAM, Hughes AD, et al. Pre-eclampsia, antiretroviral therapy, and immune reconstitution. *Lancet*. 2002 12 Oct;360(9340):1152-4.
3871. Wirbelauer J, Thomas W, Rieger L, Speer CP. Intrauterine growth retardation in preterm infants  $\leq 32$  weeks of gestation is associated with low white blood cell counts. *Am J Perinatol*. 2010 Nov;27(10):819-24.
3872. Wise LA, Mikkelsen EM, Sorensen HT, Rothman KJ, Hahn KA, Riis AH, et al. Prospective study of time to pregnancy and adverse birth outcomes. *Fertility and sterility*. 2015 Apr;103(4):1065-73.e2.
3873. Withagen MI, Wallenburg HC, Steegers EA, Hop WC, Visser W. Morbidity and development in childhood of infants born after temporising treatment of early onset pre-eclampsia. *Bjog*. 2005 Jul;112(7):910-4.
3874. Witlin AG, Mattar F, Sibai BM. Postpartum stroke: A twenty-year experience. *American Journal of Obstetrics and Gynecology*. 2000;183(1):83-8.
3875. Witlin AG, Saade GR, Mattar F, Sibai BM. Predictors of neonatal outcome in women with severe preeclampsia or eclampsia between 24 and 33 weeks' gestation. *Am J Obstet Gynecol*. 2000 Mar;182(3):607-11.
3876. Witlin AG, Sibai BM. Perinatal and maternal outcome following abruptio placentae. Hypertension in pregnancy. 2001;20(2):195-203.
3877. Witteveen T, Zwart JJ, Gast KB, Bloemenkamp KWM, van Roosmalen J. Overweight and Severe Acute Maternal Morbidity in a Low-Risk Pregnant Population in The Netherlands. *PLoS one*. 2013 12 Sep;8(9).
3878. Wiwanitkit V. Correlation between thrombomodulin and severe preeclampsia: a summary. *Clinical and applied thrombosis/hemostasis : official journal of the International Academy of Clinical and Applied Thrombosis/Hemostasis*. 2008 Jan;14(1):99-101.
3879. Wolak T, Sergienko R, Wiznitzer A, Ben Shlush L, Paran E, Sheiner E. Low potassium level during the first half of pregnancy is associated with lower risk for the development of gestational diabetes mellitus and severe pre-eclampsia. *The journal of maternal-fetal & neonatal medicine : the official journal of the European Association of Perinatal Medicine, the Federation of Asia and Oceania Perinatal Societies, the International Society of Perinatal Obstet*. 2010 Sep;23(9):994-8.
3880. Wolak T, Sergienko R, Wiznitzer A, Paran E, Sheiner E. High uric acid level during the first 20 weeks of pregnancy is associated with higher risk for gestational diabetes mellitus and mild preeclampsia. *Hypertension in pregnancy*. 2012;31(3):307-15.
3881. Woldringh GH, Frunt MH, Kremer JA, Spaanderman ME. Decreased ovarian reserve relates to pre-eclampsia in IVF/ICSI pregnancies. *Human reproduction*. 2006 Nov;21(11):2948-54.
3882. Wolf HT, Owe KM, Juhl M, Hegaard HK. Leisure time physical activity and the risk of pre-eclampsia: a systematic review. *Matern Child Health J*. 2014 May;18(4):899-910.
3883. Wolf M, Kettyle E, Sandler L, Ecker JL, Roberts J, Thadhani R. Obesity and preeclampsia: the potential role of inflammation. *Obstet Gynecol*. 2001 Nov;98(5 Pt 1):757-62.
3884. Wolf M, Sandler L, Jimenez-Kimble R, Shah A, Ecker JL, Thadhani R. Insulin resistance but not inflammation is associated with gestational hypertension. *Hypertension*. 2002 Dec;40(6):886-91.
3885. Wolf M, Sandler L, Munoz K, Hsu K, Ecker JL, Thadhani R. First trimester insulin resistance and subsequent preeclampsia: a prospective study. *The Journal of clinical endocrinology and metabolism*. 2002 Apr;87(4):1563-8.
3886. Wolf M, Shah A, Jimenez-Kimble R, Sauk J, Ecker JL, Thadhani R. Differential Risk of Hypertensive



Disorders of Pregnancy among Hispanic Women. *Journal of the American Society of Nephrology*. 2004 May;15(5):1330-8.

3887. Wolf M, Shah A, Lam C, Martinez A, Smirnakis KV, Epstein FH, et al. Circulating levels of the antiangiogenic marker sFLT-1 are increased in first versus second pregnancies. *Am J Obstet Gynecol*. 2005 Jul;193(1):16-22.

3888. Wolfensberger A, Zimmermann R, von Mandach U. Neonatal mortality and morbidity after aggressive long-term tocolysis for preterm premature rupture of the membranes. *Fetal Diagn Ther*. 2006;21(4):366-73.

3889. Wong AWY, Archer B, Mariee N, Li TC, Laird SM. Do uterine natural killer cell numbers in peri-implantation endometrium predict hypertensive disorder in pregnancy in women with a history of reproductive failure? *Journal of Reproductive Immunology*. 2014 01 Dec;106:34-40.

3890. Wong CH, Chen TL, Lee CS, Lin CJ, Chen CP. Outcome of pregnancy in patients with systemic lupus erythematosus. *Taiwanese journal of obstetrics & gynecology*. 2006 Jun;45(2):120-3.

3891. Wong GK, Chan MT, Gin T, Poon WS. Intravenous magnesium sulfate after aneurysmal subarachnoid hemorrhage: current status. *Acta neurochirurgica Supplement*. 2011;110(Pt 2):169-73.

3892. Wong HY, Tan JY, Lim CC. Abnormal liver function tests in the symptomatic pregnant patient: the local experience in Singapore. *Ann Acad Med Singapore*. 2004 Mar;33(2):204-8.

3893. Wong LF, Caughey AB, Nakagawa S, Kaimal AJ, Tran SH, Cheng YW. Perinatal outcomes among different Asian-American subgroups. *Am J Obstet Gynecol*. 2008 Oct;199(4):382.e1-6.

3894. Wong LF, Schliep KC, Silver RM, Mumford SL, Perkins NJ, Ye A, et al. The effect of a very short interpregnancy interval and pregnancy outcomes following a previous pregnancy loss. *American Journal of Obstetrics and Gynecology*. 2015 01 Mar;212(3):375.e1-.e11.

3895. Wong VW, Chong S, Jalaludin B, Russell H, Depczynski B. Urine albumin-creatinine ratio in women with gestational diabetes: Its link with glycaemic status. *Australian and New Zealand Journal of Obstetrics and Gynaecology*. 2014 01 Dec;54(6):529-33.

3896. Woodham PC, Brittain JE, Baker AM, Long DL, Haeri S, Camargo CA, Jr., et al. Midgestation maternal serum 25-hydroxyvitamin D level and soluble fms-like tyrosine kinase 1/placental growth factor ratio as predictors of severe preeclampsia. *Hypertension*. 2011 Dec;58(6):1120-5.

3897. Wortelboer EJ, Koster MP, Kuc S, Eijkemans MJ, Bilardo CM, Schielen PC, et al. Longitudinal trends in fetoplacental biochemical markers, uterine artery pulsatility index and maternal blood pressure during the first trimester of pregnancy. *Ultrasound Obstet Gynecol*. 2011 Oct;38(4):383-8.

3898. Wright D, Akolekar R, Syngelaki A, Poon LC, Nicolaides KH. A competing risks model in early screening for preeclampsia. *Fetal Diagn Ther*. 2012;32(3):171-8.

3899. Wright TE, Schuetter R, Fombonne E, Stephenson J, Haning IWF. Implementation and evaluation of a harm-reduction model for clinical care of substance using pregnant women. *Harm Reduction Journal*. 2012 19 Jan;9(5).

3900. Wu CC, Chen SH, Ho CH, Liang FW, Chu CC, Wang HY, et al. End-stage renal disease after hypertensive disorders in pregnancy. *American Journal of Obstetrics and Gynecology*. 2014 February;210(2):147.e1-.e8.

3901. Wu CS, Nohr EA, Bech BH, Vestergaard M, Catov JM, Olsen J. Health of children born to mothers who had preeclampsia: a population-based cohort study. *Am J Obstet Gynecol*. 2009 Sep;201(3):269.e1-.e10.

3902. Wu CS, Nohr EA, Bech BH, Vestergaard M, Catov JM, Olsen J. Diseases in children born to mothers with preeclampsia: a population-based sibling cohort study. *Am J Obstet Gynecol*. 2011 Feb;204(2):157.e1-5.

3903. Wu CS, Sun Y, Vestergaard M, Christensen J, Ness RB, Haggerty CL, et al. Preeclampsia and risk for epilepsy in offspring. *Pediatrics*. 2008 November;122(5):1072-8.

3904. Wu HC, Shen CM, Wu YY, Yuh YS, Kua KE. Subclinical histologic chorioamnionitis and related

clinical and laboratory parameters in preterm deliveries. *Pediatr Neonatol*. 2009 Oct;50(5):217-21.

3905. Wu J, Wilhelm M, Chung J, Ritz B. Comparing exposure assessment methods for traffic-related air pollution in an adverse pregnancy outcome study. *Environmental Research*. 2011 July;111(5):685-92.

3906. Wu JH, Chou HC, Chen PC, Jeng SF, Chen CY, Tsao PN, et al. Impact of delivery mode and gestational age on haematological parameters in Taiwanese preterm infants. *J Paediatr Child Health*. 2009 Jun;45(6):332-6.

3907. Wu Y, Xiong X, Fraser WD, Luo ZC. Association of uric acid with progression to preeclampsia and development of adverse conditions in gestational hypertensive pregnancies. *American journal of hypertension*. 2012 Jun;25(6):711-7.

3908. Wu YW, March WM, Croen LA, Grether JK, Escobar GJ, Newman TB. Perinatal stroke in children with motor impairment: A population-based study. *Pediatrics*. 2004 September;114(3):612-9.

3909. Wyckoff JA, Seely EW, Hurwitz S, Anderson BF, Lifton RP, Dluhy RG. Glucocorticoid-remediable aldosteronism and pregnancy. *Hypertension*. 2000 Feb;35(2):668-72.

3910. Xaverius P, Salas J, Kiel D, Woolfolk C. Very low birth weight and perinatal periods of risk: Disparities in St. Louis. *BioMed Research International*. 2014;2014(547234).

3911. Xaverius PK, Salas J, Woolfolk CL, Leung F, Yuan J, Chang JJ. Predictors of size for gestational age in St. Louis City and County. *BioMed research international*. 2014;2014:515827.

3912. Xiang AH, Wang X, Martinez MP, Walthall JC, Curry ES, Page K, et al. Association of maternal diabetes with autism in offspring. *JAMA - Journal of the American Medical Association*. 2015 14 Apr;313(14):1425-34.

3913. Xiang L, Wei Z, Wu J, Zhou P, Xiang H, Cao Y. Clinical significance of first-trimester intrauterine haematomas detected in pregnancies achieved by IVF-embryo transfer. *Reprod Biomed Online*. 2014 Oct;29(4):445-51.

3914. Xiao C, Gangal M, Abenhaim HA. Effect of magnesium sulfate and nifedipine on the risk of developing pulmonary edema in preterm births. *Journal of Perinatal Medicine*. 2014 01 Sep;42(5):585-9.

3915. Xiao J, Shen F, Xue Q, Chen G, Zeng K, Stone P, et al. Is ethnicity a risk factor for developing preeclampsia? An analysis of the prevalence of preeclampsia in China. *Journal of human hypertension*. 2014 Nov;28(11):694-8.

3916. Xiao R, Sorensen TK, Williams MA, Luthy DA. Influence of pre-eclampsia on fetal growth. *The journal of maternal-fetal & neonatal medicine : the official journal of the European Association of Perinatal Medicine, the Federation of Asia and Oceania Perinatal Societies, the International Society of Perinatal Obstet*. 2003 Mar;13(3):157-62.

3917. Xie F, Hu Y, Magee LA, Money DM, Patrick DM, Kraiden M, et al. An association between cytomegalovirus infection and pre-eclampsia: a case-control study and data synthesis. *Acta Obstet Gynecol Scand*. 2010 Sep;89(9):1162-7.

3918. Xie F, Hu Y, Speert DP, Turvey SE, Peng G, Money DM, et al. Toll-like receptor gene polymorphisms and preeclampsia risk: A case-control study and data synthesis. *Hypertension in pregnancy*. 2010 November;29(4):390-8.

3919. Xie RH, Guo Y, Krewski D, Mattison D, Walker MC, Nerenberg K, et al. Beta-blockers increase the risk of being born small for gestational age or of being institutionalised during infancy. *Bjog*. 2014 Aug;121(9):1090-6.

3920. Xiong F, Tong Y, Li P, Huo T, Mao M. Serum immunoglobulin e level and its impact on the pregnancy outcome associated with fetal growth restriction: A prospective cohort study. *Genetics and Molecular Research*. 2015 27 Apr;14(2):3879-88.

3921. Xiong X, Demianczuk NN, Buekens P, Saunders LD. Association of preeclampsia with high birth weight for age. *Am J Obstet Gynecol*. 2000 Jul;183(1):148-55.

3922. Xiong X, Demianczuk NN, Buekens P, Saunders LD. Association of preeclampsia with high birth weight for gestational age. *American Journal of Obstetrics and Gynecology*. 2000;183(1):148-55.

3923. Xiong X, Demianczuk NN, Saunders LD, Wang FL, Fraser WD. Impact of preeclampsia and gestational hypertension on birth weight by gestational age. *American journal of epidemiology*. 2002 Feb 1;155(3):203-9.
3924. Xiong X, Fraser WD, Demianczuk NN. History of abortion, preterm, term birth, and risk of preeclampsia: a population-based study. *Am J Obstet Gynecol*. 2002 Oct;187(4):1013-8.
3925. Xiong X, Saunders LD, Wang FL, Davidge ST, Buekens P. Preeclampsia and cerebral palsy in low-birth-weight and preterm infants: Implications for the current "ischemic model" of preeclampsia. *Hypertension in pregnancy*. 2001;20(1):1-13.
3926. Xiong X, Saunders LD, Wang FL, Demianczuk NN. Gestational diabetes mellitus: prevalence, risk factors, maternal and infant outcomes. *International journal of gynaecology and obstetrics: the official organ of the International Federation of Gynaecology and Obstetrics*. 2001 Dec;75(3):221-8.
3927. Xiong X, Wang FL, Davidge ST, Demianczuk NN, Mayes DC, Olson DM, et al. Maternal smoking and preeclampsia. *The Journal of reproductive medicine*. 2000 Sep;45(9):727-32.
3928. Xu P, Zhao Y, Liu M, Wang Y, Li YX, Zhu X, et al. Variations of microRNAs in human placentas and plasma from preeclamptic pregnancy. *Hypertension*. 2014 June;63(6):1276-84.
3929. Xu QL, Zhu M, Jin Y, Wang N, Xu HX, Quan LM, et al. The predictive value of the first-trimester maternal serum chemerin level for pre-eclampsia. *Peptides*. 2014 December;62:150-4.
3930. Yadav K, Aggarwal S, Verma K. Serum betahCG and lipid profile in early second trimester as predictors of pregnancy-induced hypertension. *Journal of Obstetrics and Gynecology of India*. 2014 June;64(3):169-74.
3931. Yalinkaya A, Erdemoglu M, Akdeniz N, Kale A, Kale E. The relationship between thrombophilic mutations and preeclampsia: a prospective case-control study. *Ann Saudi Med*. 2006 Mar-Apr;26(2):105-9.
3932. Yamada H, Atsumi T, Amengual O, Koike T, Furuta I, Ohta K, et al. Anti-beta2 glycoprotein-I antibody increases the risk of pregnancy-induced hypertension: a case-controlled study. *J Reprod Immunol*. 2010 Jan;84(1):95-9.
3933. Yamada H, Atsumi T, Kobashi G, Ota C, Kato EH, Tsuruga N, et al. Antiphospholipid antibodies increase the risk of pregnancy-induced hypertension and adverse pregnancy outcomes. *Journal of Reproductive Immunology*. 2009 January;79(2):188-95.
3934. Yamada N, Arinami T, Yamakawa-Kobayashi K, Watanabe H, Sohda S, Hamada H, et al. The 4G/5G polymorphism of the plasminogen activator inhibitor-1 gene is associated with severe preeclampsia. *Journal of human genetics*. 2000;45(3):138-41.
3935. Yamada T, Kojima T, Akaishi R, Ishikawa S, Takeda M, Kawaguchi S, et al. Problems in methods for the detection of significant proteinuria in pregnancy. *The journal of obstetrics and gynaecology research*. 2014 Jan;40(1):161-6.
3936. Yamada T, Kuwata T, Matsuda H, Deguchi K, Morikawa M, Yamada T, et al. Risk factors of eclampsia other than hypertension: pregnancy-induced antithrombin deficiency and extraordinary weight gain. *Hypertension in pregnancy*. 2012;31(2):268-77.
3937. Yamasmit W, Chaithongwongwatthana S, Charoenvithya D, Uerpairojkit B, Tolosa J. Random urinary protein-to-creatinine ratio for prediction of significant proteinuria in women with preeclampsia. *The journal of maternal-fetal & neonatal medicine : the official journal of the European Association of Perinatal Medicine, the Federation of Asia and Oceania Perinatal Societies, the International Society of Perinatal Obstet*. 2004 Nov;16(5):275-9.
3938. Yancey LM, Withers E, Bakes K, Abbott J. Postpartum preeclampsia: emergency department presentation and management. *The Journal of emergency medicine*. 2011 Apr;40(4):380-4.
3939. Yang CY, Lien R, Yang PH, Chu SM, Hsu JF, Fu RH, et al. Analysis of incidence and risk factors of retinopathy of prematurity among very-low-birth-weight infants in North Taiwan. *Pediatr Neonatol*. 2011 Dec;52(6):321-6.

3940. Yang H, Choi YS, Nam KH, Kwon JY, Park YW, Kim YH. Obstetric and perinatal outcomes of dichorionic twin pregnancies according to methods of conception: spontaneous versus in-vitro fertilization. *Twin Res Hum Genet.* 2011 Feb;14(1):98-103.
3941. Yang H, Liu H, Xu D, Zhao L, Wang Q, Leng X, et al. Pregnancy-related systemic lupus erythematosus: Clinical features, outcome and risk factors of disease flares - A case control study. *PloS one.* 2014 13 Aug;9(8).
3942. Yang JJ, Lee SA, Choi JY, Song M, Han S, Yoon HS, et al. Subsequent risk of metabolic syndrome in women with a history of preeclampsia: data from the Health Examinees Study. *J Epidemiol.* 2015;25(4):281-8.
3943. Yang Q, Wen SW, Smith GN, Chen Y, Krewski D, Chen XK, et al. Maternal cigarette smoking and the risk of pregnancy-induced hypertension and eclampsia. *International journal of epidemiology.* 2006 April;35(2):288-93.
3944. Yang YW, Chen CS, Chen YH, Lin HC. Psoriasis and pregnancy outcomes: a nationwide population-based study. *Journal of the American Academy of Dermatology.* 2011 Jan;64(1):71-7.
3945. Yang Z, Yamada J, Zhao Y, Strauss AW, Ibdah JA. Prospective screening for pediatric mitochondrial trifunctional protein defects in pregnancies complicated by liver disease. *Jama.* 2002 Nov 6;288(17):2163-6.
3946. Yap SC, Drenthen W, Meijboom FJ, Moons P, Mulder BJ, Vliegen HW, et al. Comparison of pregnancy outcomes in women with repaired versus unrepaired atrial septal defect. *Bjog.* 2009 Nov;116(12):1593-601.
3947. Yap SC, Drenthen W, Pieper PG, Moons P, Mulder BJ, Vliegen HW, et al. Pregnancy outcome in women with repaired versus unrepaired isolated ventricular septal defect. *Bjog.* 2010 May;117(6):683-9.
3948. Yarde F, Maas AH, Franx A, Eijkemans MJ, Drost JT, van Rijn BB, et al. Serum AMH levels in women with a history of preeclampsia suggest a role for vascular factors in ovarian aging. *The Journal of clinical endocrinology and metabolism.* 2014 Feb;99(2):579-86.
3949. Yasmin H, Hassan I, Vanga P, Subramaniam M, Adeghe JH. Adverse obstetric outcome in women with a history of infertility: a retrospective study. *Journal of obstetrics and gynaecology : the journal of the Institute of Obstetrics and Gynaecology.* 2006 Jan;26(1):35-6.
3950. Yassaee F. Hyperuricemia and perinatal outcomes in patients with severe preeclampsia. *Iranian Journal of Medical Sciences.* 2003 December;28(4):198-9.
3951. Yassaee F, Moshiri F. Pregnancy outcome in kidney transplant patients. *Urol J.* 2007 Winter;4(1):14-7.
3952. Yasuda R, Takeuchi K, Funakoshi T, Maruo T. Bioelectrical impedance analysis in the clinical management of preeclamptic women with edema. *J Perinat Med.* 2003;31(4):275-80.
3953. Yazdani M, Sarvestani EK, Shomali Z, Yosofi S, Shakeri A. Serum levels of B lymphocyte activating factor (BAFF) and A proliferation-inducing ligand (APRIL) in patients with preeclampsia. *Internet Journal of Gynecology and Obstetrics.* 2013;17(3).
3954. Yazdani S, Bouzari Z, Sedaghat S, Samakoosh MA, Farajnejad K. Evaluation of incidence in pregnancy and related factor. *Journal of Mazandaran University of Medical Sciences.* 2012 June;22(89):58-64.
3955. Ye C, Ruan Y, Zou L, Li G, Li C, Chen Y, et al. The 2011 survey on hypertensive disorders of pregnancy (HDP) in China: Prevalence, risk factors, complications, pregnancy and perinatal outcomes. *PloS one.* 2014 17 Jun;9(6).
3956. Yee LM, Cheng YW, Liddell J, Block-Kurbisch I, Caughey AB. 50-Gram glucose challenge test: is it indicative of outcomes in women without gestational diabetes mellitus? *The journal of maternal-fetal & neonatal medicine : the official journal of the European Association of Perinatal Medicine, the Federation of Asia and Oceania Perinatal Societies, the International Society of Perinatal Obstet.* 2011 Sep;24(9):1102-6.

3957. Yego F, D'Este C, Byles J, Williams JS, Nyongesa P. Risk factors for maternal mortality in a Tertiary Hospital in Kenya: a case control study. *BMC pregnancy and childbirth*. 2014;14:38.
3958. Yego F, Stewart Williams J, Byles J, Nyongesa P, Aruasa W, D'Este C. A retrospective analysis of maternal and neonatal mortality at a teaching and referral hospital in Kenya. *Reprod Health*. 2013;10:13.
3959. Yen TA, Yang HI, Hsieh WS, Chou HC, Chen CY, Tsou KI, et al. Preeclampsia and the risk of bronchopulmonary dysplasia in VLBW infants: a population based study. *PloS one*. 2013;8(9):e75168.
3960. Yen TW, Payne B, Qu Z, Hutcheon JA, Lee T, Magee LA, et al. Using clinical symptoms to predict adverse maternal and perinatal outcomes in women with preeclampsia: data from the PIERS (Pre-eclampsia Integrated Estimate of RiSk) study. *Journal of obstetrics and gynaecology Canada : JOGC = Journal d'obstetrique et gynecologie du Canada : JOGC*. 2011 Aug;33(8):803-9.
3961. Yeo S. Prenatal stretching exercise and autonomic responses: preliminary data and a model for reducing preeclampsia. *Journal of nursing scholarship : an official publication of Sigma Theta Tau International Honor Society of Nursing / Sigma Theta Tau*. 2010 Jun;42(2):113-21.
3962. Yeo S, Wells PJ, Kieffer EC, Nolan GH. Preeclampsia among Hispanic women in a Detroit health system. *Ethnicity & disease*. 2007 Winter;17(1):118-21.
3963. Yie SM, Taylor RN, Librach C. Low plasma HLA-G protein concentrations in early gestation indicate the development of preeclampsia later in pregnancy. *Am J Obstet Gynecol*. 2005 Jul;193(1):204-8.
3964. Yildirim G, Asicioglu O, Gungorduk K, Turan I, Acar D, Aslan H, et al. Subsequent obstetrics outcomes after intrauterine death during the first pregnancy. *The journal of maternal-fetal & neonatal medicine : the official journal of the European Association of Perinatal Medicine, the Federation of Asia and Oceania Perinatal Societies, the International Society of Perinatal Obstet*. 2014 Jul;27(10):1029-32.
3965. Yildirim G, Gungorduk K, Gul A, Asicioglu O, Sudolmus S, Gungorduk OC, et al. HELLP syndrome: 8 years of experience from a tertiary referral center in western Turkey. *Hypertension in pregnancy*. 2012;31(3):316-26.
3966. Yilmaz Y, Kutman HG, Ulu HO, Canpolat FE, Uras N, Oguz SS, et al. Preeclampsia is an independent risk factor for spontaneous intestinal perforation in very preterm infants. *The journal of maternal-fetal & neonatal medicine : the official journal of the European Association of Perinatal Medicine, the Federation of Asia and Oceania Perinatal Societies, the International Society of Perinatal Obstet*. 2014 Aug;27(12):1248-51.
3967. Yinon Y, Kingdom JC, Odutayo A, Moineddin R, Drewlo S, Lai V, et al. Vascular dysfunction in women with a history of preeclampsia and intrauterine growth restriction: insights into future vascular risk. *Circulation*. 2010 Nov 2;122(18):1846-53.
3968. Yinon Y, Kingdom JC, Proctor LK, Kelly EN, Salle JL, Wherrett D, et al. Hypospadias in males with intrauterine growth restriction due to placental insufficiency: the placental role in the embryogenesis of male external genitalia. *American journal of medical genetics Part A*. 2010 Jan;152a(1):75-83.
3969. Yliniemi A, Nurkkala MM, Kopman S, Korpimaki T, Kouru H, Ryyanen M, et al. First trimester placental retinol-binding protein 4 (RBP4) and pregnancy-associated placental protein A (PAPP-A) in the prediction of early-onset severe pre-eclampsia. *Metabolism: Clinical and Experimental*. 2015 01 Apr;64(4):521-6.
3970. YM AM, Elussein EA, Omer MM, Samaan SI, F AR, Adam I. Heparin and aspirin in pregnant Sudanese women with recurrent miscarriage associated with antiphospholipid antibodies. *Afr J Reprod Health*. 2007 Aug;11(2):95-8.
3971. Yogev, Chen, Hod, Coustan, Oats, McIntyre, et al. Hyperglycemia and Adverse Pregnancy Outcome (HAPO) study: preeclampsia. *Am J Obstet Gynecol*. 2010 Mar;202(3):255.e1-7.
3972. Yogev Y, Chen R, Ben-Haroush A, Hod M, Bar J. Maternal overweight and pregnancy outcome in women with Type-1 diabetes mellitus and different degrees of nephropathy. *The journal of*

maternal-fetal & neonatal medicine : the official journal of the European Association of Perinatal Medicine, the Federation of Asia and Oceania Perinatal Societies, the International Society of Perinatal Obstet. 2010 Sep;23(9):999-1003.

3973. Yogev Y, Langer O. Spontaneous preterm delivery and gestational diabetes: the impact of glycemic control. *Arch Gynecol Obstet.* 2007 Oct;276(4):361-5.

3974. Yogev Y, Langer O, Brustman L, Rosenn B. Pre-eclampsia and gestational diabetes mellitus: does a correlation exist early in pregnancy? *The journal of maternal-fetal & neonatal medicine : the official journal of the European Association of Perinatal Medicine, the Federation of Asia and Oceania Perinatal Societies, the International Society of Perinatal Obstet.* 2004 Jan;15(1):39-43.

3975. Yogev Y, Melamed N, Bardin R, Tenenbaum-Gavish K, Ben-Shitrit G, Ben-Haroush A. Pregnancy outcome at extremely advanced maternal age. *Am J Obstet Gynecol.* 2010 Dec;203(6):558.e1-7.

3976. Yogev Y, Xenakis EM, Langer O. The association between preeclampsia and the severity of gestational diabetes: the impact of glycemic control. *Am J Obstet Gynecol.* 2004 Nov;191(5):1655-60.

3977. Yokota H, Miyamoto K, Yokoyama K, Noguchi H, Uyama K, Oku M. Spontaneous acute subdural haematoma and intracerebral haemorrhage in patient with HELLP syndrome: Case report. *Acta Neurochirurgica.* 2009 January;151(12):1689-92.

3978. Yoneyama K, Sekiguchi A, Matsushima T, Kawase R, Nakai A, Asakura H, et al. Clinical characteristics of amniotic fluid embolism: an experience of 29 years. *The journal of obstetrics and gynaecology research.* 2014 Jul;40(7):1862-70.

3979. Yong PJ, Langlois S, von Dadelszen P, Robinson W. The association between preeclampsia and placental trisomy 16 mosaicism. *Prenatal diagnosis.* 2006 Oct;26(10):956-61.

3980. You JY, Kim MK, Choi SJ, Oh SY, Kim SJ, Kim JH, et al. Predictive factors for adverse pregnancy outcomes after renal transplantation. *Clin Transplant.* 2014 Jun;28(6):699-706.

3981. Young EC, Pires ML, Marques LP, de Oliveira JE, Zajdenverg L. Effects of pregnancy on the onset and progression of diabetic nephropathy and of diabetic nephropathy on pregnancy outcomes. *Diabetes & metabolic syndrome.* 2011 Jul-Sep;5(3):137-42.

3982. Younis JS, Laufer N. Oocyte donation is an independent risk factor for pregnancy complications: The implications for women of advanced age. *Journal of Women's Health.* 2015 01 Feb;24(2):127-30.

3983. Youssef A, Righetti F, Morano D, Rizzo N, Farina A. Uterine artery Doppler and biochemical markers (PAPP-A, PIGF, sFlt-1, P-selectin, NGAL) at 11 + 0 to 13 + 6 weeks in the prediction of late (> 34 weeks) pre-eclampsia. *Prenatal diagnosis.* 2011 Dec;31(12):1141-6.

3984. Youssef A, Righetti F, Morano D, Rizzo N, Farina A. Uterine artery Doppler and biochemical markers (PAPP-A, PIGF, sFlt-1, P-selectin, NGAL) at 11+0 to 13+6weeks in the prediction of late (>34weeks) pre-eclampsia. *Prenatal diagnosis.* 2011 December;31(12):1141-6.

3985. Yousuf NA, Yousuf IA, Talukder NU, Kutubi A, Nahar PAS, Hena SB. Maternal risk factors for perinatal mortality. *Bangladesh Journal of Obstetrics and Gynecology.* 2011 September;26(2):86-91.

3986. Yu CK, Papageorghiou AT, Parra M, Palma Dias R, Nicolaides KH. Randomized controlled trial using low-dose aspirin in the prevention of pre-eclampsia in women with abnormal uterine artery Doppler at 23 weeks' gestation. *Ultrasound Obstet Gynecol.* 2003 Sep;22(3):233-9.

3987. Yu CK, Smith GC, Papageorghiou AT, Cacho AM, Nicolaides KH. An integrated model for the prediction of preeclampsia using maternal factors and uterine artery Doppler velocimetry in unselected low-risk women. *Am J Obstet Gynecol.* 2005 Aug;193(2):429-36.

3988. Yu F, Lv L, Liang Z, Wang Y, Wen J, Lin X, et al. Continuous glucose monitoring effects on maternal glycemic control and pregnancy outcomes in patients with gestational diabetes mellitus: A prospective cohort study. *Journal of Clinical Endocrinology and Metabolism.* 2014 01 Dec;99(12):4674-82.

3989. Yu H, Shen Y, Ge Q, He Y, Qiao D, Ren M, et al. Quantification of maternal serum cell-free fetal DNA in early-onset preeclampsia. *International Journal of Molecular Sciences.* 2013 April;14(4):7571-82.

3990. Yu H, Shen YT, Li HL, Yan Y, Ren ML, Wang B. The relationship between maternal serum prenatal screening combined with epidemiological study and early onset preeclampsia. *Arch Gynecol Obstet*. 2014 Apr;289(4):749-53.
3991. Yu L, Li D, Liao QP, Yang HX, Cao B, Fu G, et al. High levels of activin A detected in preeclamptic placenta induce trophoblast cell apoptosis by promoting nodal signaling. *The Journal of clinical endocrinology and metabolism*. 2012 Aug;97(8):E1370-9.
3992. Yu XD, Branch DW, Karumanchi SA, Zhang J. Preeclampsia and retinopathy of prematurity in preterm births. *Pediatrics*. 2012 Jul;130(1):e101-7.
3993. Yu Y, Jenkins AJ, Nankervis AJ, Hanssen KF, Scholz H, Henriksen T, et al. Anti-angiogenic factors and pre-eclampsia in type 1 diabetic women. *Diabetologia*. 2009 January;52(1):160-8.
3994. Yuan LJ, Duan YY, Xue D, Cao TS, Zhou N. Ultrasound study of carotid and cardiac remodeling and cardiac-arterial coupling in normal pregnancy and preeclampsia: a case control study. *BMC pregnancy and childbirth*. 2014;14:113.
3995. Yuan N, El-Sayed YY, Ruoss SJ, Riley E, Enns GM, Robinson TE. Successful pregnancy and cesarean delivery via noninvasive ventilation in mitochondrial myopathy. *Journal of Perinatology*. 2009;29(2):166-7.
3996. Yucel N, Demirci AF, Ogutcuoglu B, Orgul G, Kavak H, Karaalp E. Retrospective analysis of one year-cesarean sections in a tertiary hospital in Turkey: Various indications of the unwritten in the literature and intraoperative surgical morbidities. *Turkiye Klinikleri Jinekoloji Obstetrik*. 2013 30 Jan;23(1):15-8.
3997. Yucesoy G, Cakiroglu Y, Bodur H, Ozkan S, Tan T. An analysis of HELLP syndrome cases: does platelet count predict adverse maternal and fetal outcomes in women with HELLP syndrome? *Arch Gynecol Obstet*. 2011 May;283(5):941-5.
3998. Yucesoy G, Ozkan S, Bodur H, Tan T, Caliskan E, Vural B, et al. Maternal and perinatal outcome in pregnancies complicated with hypertensive disorder of pregnancy: a seven year experience of a tertiary care center. *Arch Gynecol Obstet*. 2005 Nov;273(1):43-9.
3999. Zafarmand MH, Franx A, Sabour S, van der Schouw YT, Grobbee DE, de Leeuw PW, et al. The M235T variant of the angiotensinogen gene is related to development of self-reported hypertension during pregnancy: the Prospect-EPIC cohort study. *Hypertension research : official journal of the Japanese Society of Hypertension*. 2008 Jul;31(7):1299-305.
4000. Zammit S, Odd D, Horwood J, Thompson A, Thomas K, Menezes P, et al. Investigating whether adverse prenatal and perinatal events are associated with non-clinical psychotic symptoms at age 12 years in the ALSPAC birth cohort. *Psychol Med*. 2009 Sep;39(9):1457-67.
4001. Zamudio S, Torricos T, Fik E, Oyala M, Echalar L, Pullockaran J, et al. Hypoglycemia and the origin of hypoxia-induced reduction in human fetal growth. *PloS one*. 2010 01 Jan;5(1).
4002. Zanette E, Parpinelli MA, Surita FG, Costa ML, Haddad SM, Sousa MH, et al. Maternal near miss and death among women with severe hypertensive disorders: A Brazilian multicenter surveillance study. *Reproductive Health*. 2014 16 Jan;11(1).
4003. Zareian Z. Hypertensive disorders of pregnancy. *International journal of gynaecology and obstetrics: the official organ of the International Federation of Gynaecology and Obstetrics*. 2004 Nov;87(2):194-8.
4004. Zawiejska A, Wender-Ozegowska E, Iciek R, Brazert J. Concentrations of endothelial nitric oxide synthase, angiotensin-converting enzyme, vascular endothelial growth factor and placental growth factor in maternal blood and maternal metabolic status in pregnancy complicated by hypertensive disorders. *Journal of human hypertension*. 2014 Nov;28(11):670-6.
4005. Zayed MA, Uppal A, Hartnett ME. New-onset maternal gestational hypertension and risk of retinopathy of prematurity. *Invest Ophthalmol Vis Sci*. 2010 Oct;51(10):4983-8.
4006. Zeeman GG, Alexander JM, McIntire DD, Byrd W, Leveno KJ. Inhibin-A and superimposed

preeclampsia in women with chronic hypertension. *Obstet Gynecol.* 2003 Feb;101(2):232-6.

4007. Zeeman GG, Alexander JM, McIntire DD, Devaraj S, Leveno KJ. Homocysteine plasma concentration levels for the prediction of preeclampsia in women with chronic hypertension. *Am J Obstet Gynecol.* 2003 Aug;189(2):574-6.

4008. Zeeman GG, McIntire DD, Twickler DM. Maternal and fetal artery Doppler findings in women with chronic hypertension who subsequently develop superimposed pre-eclampsia. *The journal of maternal-fetal & neonatal medicine : the official journal of the European Association of Perinatal Medicine, the Federation of Asia and Oceania Perinatal Societies, the International Society of Perinatal Obstet.* 2003 Nov;14(5):318-23.

4009. Zekavat OR, Eskandary M, Jahromi BN, Rasekh A, Barzegar S, Panahy NI, et al. Possible association between Glucose-6- Phosphate dehydrogenase deficiency and the development of preeclampsia. *Iranian Journal of Medical Sciences.* 2010 December;35(4):323-6.

4010. Zeleke BM, Zelalem M, Mohammed N. Incidence and correlates of low birth weight at a referral hospital in northwest ethiopia. *Pan African Medical Journal.* 2012;12(1).

4011. Zeng B, Kwak-Kim J, Liu Y, Liao AH. Treg cells are negatively correlated with increased memory B cells in pre-eclampsia while maintaining suppressive function on autologous B-cell proliferation. *American journal of reproductive immunology (New York, NY : 1989).* 2013 Dec;70(6):454-63.

4012. Zeng X, Sun Y, Yang HX, Li D, Li YX, Liao QP, et al. Plasma level of soluble c-Met is tightly associated with the clinical risk of preeclampsia. *Am J Obstet Gynecol.* 2009 Dec;201(6):618.e1-7.

4013. Zetterstrom K, Lindeberg S, Haglund B, Magnuson A, Hanson U. Being born small for gestational age increases the risk of severe pre-eclampsia. *Bjog.* 2007 Mar;114(3):319-24.

4014. Zetterstrom K, Lindeberg SN, Haglund B, Hanson U. Maternal complications in women with chronic hypertension: a population-based cohort study. *Acta Obstet Gynecol Scand.* 2005 May;84(5):419-24.

4015. Zetterstrom K, Lindeberg SN, Haglund B, Hanson U. Chronic hypertension as a risk factor for offspring to be born small for gestational age. *Acta Obstet Gynecol Scand.* 2006;85(9):1046-50.

4016. Zetterstrom K, Lindeberg SN, Haglund B, Hanson U. The association of maternal chronic hypertension with perinatal death in male and female offspring: A record linkage study of 866 188 women. *BJOG: An International Journal of Obstetrics and Gynaecology.* 2008 October;115(11):1436-42.

4017. Zeybek B, Terek MC, Guven C, Cinar C. Placement of a vena cava filter in term pregnancy: Case report and review of the literature. *Clinical and Experimental Obstetrics and Gynecology.* 2011;38(1):96-8.

4018. Zhai D, Guo Y, Smith G, Krewski D, Walker M, Wen SW. Maternal exposure to moderate ambient carbon monoxide is associated with decreased risk of preeclampsia. *Am J Obstet Gynecol.* 2012 Jul;207(1):57.e1-9.

4019. Zhang J. Partner change, birth interval and risk of pre-eclampsia: a paradoxical triangle. *Paediatric and perinatal epidemiology.* 2007 Jul;21 Suppl 1:31-5.

4020. Zhang J, Troendle JF, Levine RJ. Risks of hypertensive disorders in the second pregnancy. *Paediatric and perinatal epidemiology.* 2001 Jul;15(3):226-31.

4021. Zhang J, Villar J, Sun W, Merialdi M, Abdel-Aleem H, Mathai M, et al. Blood pressure dynamics during pregnancy and spontaneous preterm birth. *Am J Obstet Gynecol.* 2007 Aug;197(2):162.e1-6.

4022. Zhang S, Ding Z, Liu H, Chen Z, Wu J, Zhang Y, et al. Association between mental stress and gestational hypertension/ preeclampsia: A meta-analysis. *Obstetrical and Gynecological Survey.* 2013 December;68(12):825-34.

4023. Zhang YP, Liu XH, Gao SH, Wang JM, Gu YS, Zhang JY, et al. Risk factors for preterm birth in five Maternal and Child Health hospitals in Beijing. *PloS one.* 2012;7(12):e52780.

4024. Zhao C, Qu Y, Sui R, Feng J, Gao J, Ma J, et al. Delayed visual recovery in pregnancy-associated thrombotic thrombocytopenic purpura with bilateral serous retinal detachment. *Documenta*



- ophthalmologica Advances in ophthalmology. 2013 Apr;126(2):163-9.
4025. Zhao C, Zhao J, Huang Y, Wang Z, Wang H, Zhang H, et al. New-onset systemic lupus erythematosus during pregnancy. Clin Rheumatol. 2013 Jun;32(6):815-22.
4026. Zhao L, Bracken MB, DeWan AT. Genome-wide association study of pre-eclampsia detects novel maternal single nucleotide polymorphisms and copy-number variants in subsets of the Hyperglycemia and Adverse Pregnancy Outcome (HAPO) study cohort. Annals of human genetics. 2013 Jul;77(4):277-87.
4027. Zhao S, Gu X, Groome LJ, Wang Y. Decreased nephrin and GLEPP-1, but increased VEGF, Flt-1, and nitrotyrosine, expressions in kidney tissue sections from women with preeclampsia. Reprod Sci. 2009 Oct;16(10):970-9.
4028. Zhao Y, Liu G, Wang J, Yang J, Shen D, Zhang X. Mirror syndrome in a Chinese hospital: Diverse causes and maternal fetal features. Journal of Maternal-Fetal and Neonatal Medicine. 2013 February;26(3):254-8.
4029. Zhong XY, Holzgreve W, Hahn S. The levels of circulatory cell free fetal DNA in maternal plasma are elevated prior to the onset of preeclampsia. Hypertension in pregnancy. 2002;21(1):77-83.
4030. Zhong XY, Laivuori H, Livingston JC, Ylikorkala O, Sibai BM, Holzgreve W, et al. Elevation of both maternal and fetal extracellular circulating deoxyribonucleic acid concentrations in the plasma of pregnant women with preeclampsia. Am J Obstet Gynecol. 2001 Feb;184(3):414-9.
4031. Zhong XY, Volgmann T, Hahn S, Holzgreve W. Large scale analysis of circulatory fetal DNA concentrations in pregnancies which subsequently develop preeclampsia using two Y chromosome specific real-time PCR assays. Journal of the Turkish German Gynecology Association. 2007 June;8(2):135-9.
4032. Zhou A, Dekker GA, Lumbers ER, Lee SY, Thompson SD, McCowan LME, et al. The association of AGTR2 polymorphisms with preeclampsia and uterine artery bilateral notching is modulated by maternal BMI. Placenta. 2013 January;34(1):75-81.
4033. Zhou A, Dekker GA, Lumbers ER, Leemaqz SY, Thompson SD, Heinemann G, et al. The association of maternal ACE A11860G with small for gestational age babies is modulated by the environment and by fetal sex: a multicentre prospective case-control study. Mol Hum Reprod. 2013 Sep;19(9):618-27.
4034. Zhou A, Dekker GA, Lumbers ER, Leemaqz SY, Thompson SD, Heinemann G, et al. The association of maternal ACE A11860G with small for gestational age babies is modulated by the environment and by fetal sex: A multicentre prospective case-control study. Molecular Human Reproduction. 2013 September;19(9):618-27.
4035. Zhou J, Su L, Liu M, Liu Y, Cao X, Wang Z, et al. Associations between 25-hydroxyvitamin D levels and pregnancy outcomes: a prospective observational study in southern China. Eur J Clin Nutr. 2014 Aug;68(8):925-30.
4036. Zhou J, Zhao X, Wang Z, Hu Y. Combination of lipids and uric acid in mid-second trimester can be used to predict adverse pregnancy outcomes. The journal of maternal-fetal & neonatal medicine : the official journal of the European Association of Perinatal Medicine, the Federation of Asia and Oceania Perinatal Societies, the International Society of Perinatal Obstet. 2012 Dec;25(12):2633-8.
4037. Ziadeh S, Yahaya A. Pregnancy outcome at age 40 and older. Arch Gynecol Obstet. 2001 Mar;265(1):30-3.
4038. Ziaei S, Bonab KM, Kazemnejad A. Serum lipid levels at 28-32 weeks gestation and hypertensive disorders. Hypertension in pregnancy. 2006;25(1):3-10.
4039. Zieleskiewicz L, Lagier D, Contargyris C, Bourgoin A, Gavage L, Martin C, et al. Lung ultrasound-guided management of acute breathlessness during pregnancy. Anaesthesia. 2013 January;68(1):97-101.
4040. Ziraba AK, Madise N, Mills S, Kyobutungi C, Ezeh A. Maternal mortality in the informal settlements of Nairobi city: What do we know? Reproductive Health. 2009;6(1).

4041. Zisk JL, MacKley A, Christensen RD, Paul DA. Is a small platelet mass associated with intraventricular hemorrhage in very low-birth-weight infants. *Journal of Perinatology*. 2011 December;31(12):776-9.
4042. Zoabi L, Weintraub AY, Novak L, Rafaeli-Yehudai T, Katz O, Beer-Wizel R, et al. Do patients who deliver at term after being hospitalized for preterm contractions have an increased risk for obstetrical complications? *Arch Gynecol Obstet*. 2013 Sep;288(3):537-42.
4043. Zoller B, Li X, Sundquist J, Sundquist K. Venous thromboembolism does not share strong familial susceptibility with pre-eclampsia/eclampsia: A nationwide family study in Sweden. *BJOG: An International Journal of Obstetrics and Gynaecology*. 2013 September;120(10):1200-6.
4044. Zugna D, Galassi C, Annesi-Maesano I, Baiz N, Barros H, Basterrechea M, et al. Maternal complications in pregnancy and wheezing in early childhood: A pooled analysis of 14 birth cohorts. *International journal of epidemiology*. 2015 01 Feb;44(1):199-208.
4045. Zupan-Simunek V. Prognosis in newborns after mother's preeclampsia. [French, English] Pronostic des nouveau-nés de mère preeclamptique. *Annales Francaises d'Anesthesie et de Reanimation*. 2010 May;29(5):e135-e9.
4046. Zwahlen M, Gerber S, Bersinger NA. First trimester markers for pre-eclampsia: placental vs. non-placental protein serum levels. *Gynecol Obstet Invest*. 2007;63(1):15-21.
4047. Zwart JJ, Richters A, Ory F, De Vries JIP, Bloemenkamp KWM, Van Roosmalen J. Eclampsia in the Netherlands. *Obstetrics and Gynecology*. 2008 October;112(4):820-7.
4048. Zwart JJ, Richters JM, Ory F, De Vries JIP, Bloemenkamp KWM, Van Roosmalen J. Severe maternal morbidity during pregnancy, delivery and puerperium in the Netherlands: A nationwide population-based study of 371 000 pregnancies. *BJOG: An International Journal of Obstetrics and Gynaecology*. 2008 June;115(7):842-50.
