# Supplementary material for: Clinical risk factors for pre-eclampsia determined in early pregnancy: systematic review and meta-analysis of large cohort studies
Source: PubMed Central journal article supplement — BMJ. 2016 Apr 19;353:i1753. doi: 10.1136/bmj.i1753 (PMC4837230; doi:10.1136/bmj.i1753), 2016-04-19
Supplement: bare029374.ww2_default.pdf [file bare029374.ww2_default.pdf]

**Appendix 2: Study and participant characteristics for all 92 included cohort studies. [posted as supplied by author]**

| Citation                | Country       | Type and source of cohort, study period                                            | Maternal inclusion criteria                                                                                                                                                                | Maternal exclusion criteria                                                                                                                                                 | Cohort size | Definition of preeclampsia                         | Attrition due to study withdrawal or loss to follow-up (attrition rate [%]) |
|-------------------------|---------------|------------------------------------------------------------------------------------|--------------------------------------------------------------------------------------------------------------------------------------------------------------------------------------------|-----------------------------------------------------------------------------------------------------------------------------------------------------------------------------|-------------|----------------------------------------------------|-----------------------------------------------------------------------------|
| Al-Mulhim AA 2003       | Saudi Arabia  | Retrospective cohort study, single hospital, 1992-2001                             | Woman received obstetric care and delivered at King Fahad Hospital of the University                                                                                                       | None stated                                                                                                                                                                 | 27,787      | New-onset elevated blood pressure with proteinuria | Not reported                                                                |
| Ananth CV 2007          | United States | Retrospective cohort study (with case-crossover analysis), single state, 1989-1997 | Woman had two consecutive singleton livebirths in Missouri                                                                                                                                 | None stated                                                                                                                                                                 | 154,810     | New-onset elevated blood pressure with proteinuria | Not reported                                                                |
| Anderson NH 2012        | New Zealand   | Retrospective cohort study, single centre, 2006-2009                               | Singleton pregnancies delivered $\geq$ 20 weeks' gestation at National Women's Health, Auckland, New Zealand                                                                               | Infants with major congenital abnormalities, missing data on maternal height and/or weight or infant birthweight                                                            | 26,254      | New-onset elevated blood pressure with proteinuria | Not reported                                                                |
| Baeten JM 2001          | United States | Retrospective cohort study, single state, 1992-1996                                | Birth Certificates in Washington state 1992-1996 with prepregnancy maternal weight with self-reported height obtained from Washington State drivers' license records for 1992 through 1997 | BMI data not available                                                                                                                                                      | 96,801      | None provided                                      | Not reported                                                                |
| Basso O 2004            | Denmark       | Nationwide longitudinal prospective cohort study, 1998-2001                        | Singleton livebirths recorded in the Danish Medical Birth Registry with a gestational age of $\geq$ 24 completed weeks                                                                     | Missing birth record, missing values in parity, mother's height, smoking; no birth record could be found, > 1 birth in the study period and second was third birth or later | 59,968      | ICD diagnostic codes                               | Not reported                                                                |
| Bautista-Castano I 2013 | Spain         | Retrospective cohort study, single hospital, 2008                                  | All pregnant women who delivered at Maternal & Child University Hospital of Gran Canaria (HUMIGC)                                                                                          | Missing or incorrect data regarding weight, height, and/or age, multiple pregnancy                                                                                          | 6,558       | None provided                                      | Not reported                                                                |
| Berlac JF 2014          | Denmark       | Nationwide historical controlled cohort study, 1996-2011                           | All 15-49 year old women who had gastric bypass during the period 1996-2011, and subsequently gave birth to a singleton                                                                    | Twin deliveries                                                                                                                                                             | 2,070       | New-onset elevated blood pressure with proteinuria | Not reported                                                                |

| Citation            | Country        | Type and source of cohort, study period                     | Maternal inclusion criteria                                                                                                                                                          | Maternal exclusion criteria                                                                                                                                                     | Cohort size | Definition of preeclampsia                         | Attrition due to study withdrawal or loss to follow-up (attrition rate [%]) |
|---------------------|----------------|-------------------------------------------------------------|--------------------------------------------------------------------------------------------------------------------------------------------------------------------------------------|---------------------------------------------------------------------------------------------------------------------------------------------------------------------------------|-------------|----------------------------------------------------|-----------------------------------------------------------------------------|
| Bhattacharya S 2007 | Scotland       | Retrospective cohort study, single city, 1976-2005          | All primigravid women who delivered singleton babies > 24 weeks of gestation in Aberdeen city and district                                                                           | Women who booked after 16 weeks, missing data on height and/or weight or outcome variables                                                                                      | 24,241      | ICD diagnostic codes                               | Due to incomplete outcome data (1.2-2.8%)                                   |
| Black M 2008        | Scotland       | Retrospective cohort study, single region, 1976-2006        | Women in the Grampian region who delivered their first and second singleton pregnancies                                                                                              | Missing variables                                                                                                                                                               | 34,079      | ICD diagnostic codes                               | 0.0%                                                                        |
| Blomberg M 2014     | Sweden         | Nationwide prospective cohort study, 1992-2010              | Primiparous women with singleton births prospectively registered in the Swedish Medical Birth Register                                                                               | Missing data on maternal age                                                                                                                                                    | 798,674     | ICD diagnostic codes                               | Not reported                                                                |
| Boghossian NS 2014  | United States  | Longitudinal retrospective study, 20 hospitals, 2002-2010   | Women with $\geq 2$ consecutive pregnancies delivered during the study period, singletons for the first two pregnancies during the study period, nulliparous at study entry          | Women with data inconsistencies, superimposed preeclampsia or chronic hypertension during either pregnancy                                                                      | 26,613      | New-onset elevated blood pressure with proteinuria | Not reported                                                                |
| Boyd HA 2013        | Denmark        | Nationwide retrospective cohort study, 1978-2008            | Women who delivered $\geq 1$ live singletons with known gestational age at birth                                                                                                     | Pregnancies ending in stillbirth (not included in primary analysis, but included in subcohorts)                                                                                 | 1,377,479   | ICD diagnostic codes                               | Not reported                                                                |
| Brown MA 2007       | Australia      | Retrospective cohort study, multicentre database, 1988-1998 | Women having subsequent pregnancies who had preeclampsia or gestation hypertension in the index pregnancy and matched controls without hypertensive disorders in the index pregnancy | None stated                                                                                                                                                                     | 1,099       | New-onset elevated blood pressure with proteinuria | 0.0%                                                                        |
| Carbone IF 2011     | United Kingdom | Prospective cohort study, two hospitals, 2006-2009          | Women attending their routine first hospital visit in pregnancy at King's College Hospital, London and Medway Maritime Hospital, Kent                                                | Conception by intrauterine insemination, no or incomplete data on pregnancy outcome, prenatal or postnatal diagnoses or aneuploidies or major defects, or pregnancy termination | 27,461      | New-onset elevated blood pressure with proteinuria | Not reported                                                                |

| Citation          | Country   | Type and source of cohort, study period                     | Maternal inclusion criteria                                                                                                                                                                              | Maternal exclusion criteria                                                                                                                    | Cohort size | Definition of preeclampsia                         | Attrition due to study withdrawal or loss to follow-up (attrition rate [%]) |
|-------------------|-----------|-------------------------------------------------------------|----------------------------------------------------------------------------------------------------------------------------------------------------------------------------------------------------------|------------------------------------------------------------------------------------------------------------------------------------------------|-------------|----------------------------------------------------|-----------------------------------------------------------------------------|
| Catov JM 2007     | Denmark   | Nationwide longitudinal prospective cohort study, 1997-2003 | Women with singleton and multiple gestation pregnancies who completed the first interview and delivered a liveborn at $\geq 24$ weeks or a stillborn at $\geq 28$ week without a congenital malformation | Missing parity values, incomplete outcome data                                                                                                 | 70,924      | ICD diagnostic codes                               | Due to incomplete outcome data (0.10%)                                      |
| Cedergren MI 2004 | Sweden    | Nationwide prospective cohort study, 1992-2001              | Pregnancies, including stillbirths > 28 weeks gestation, in the Swedish Medical Birth Registry                                                                                                           | Maternal height and weight in early pregnancy were not available, women with insulin dependent diabetes mellitus                               | 805,275     | ICD diagnostic codes                               | Not reported                                                                |
| Chen XK 2009      | Canada    | Retrospective cohort study, single province, 2005           | Women in the Ontario Niday Perinatal Database who conceived through ART, and controls matched for age, parity, plurality, delivery hospital level, and residence area                                    | Subjects with chronic hypertension, pregestational diabetes (insulin- or noninsulin-dependent), or heart disease                               | 6,547       | New-onset elevated blood pressure with proteinuria | Not reported                                                                |
| Croft ML 2010     | Australia | Retrospective cohort study, single state, 1980-2001         | All women in the Pathways study, with $\geq 2$ births recorded between 1980-2001, whose first child was a singleton and second born infants were either singletons or twins                              | Women who were recorded on the WA Mental Health Register but whose diagnostic codes did not include psychosis                                  | 239,995     | ICD diagnostic codes                               | Not reported                                                                |
| Dayan N 2015      | Canada    | Retrospective cohort study, single hospital, 2001-2008      | All livebirths and stillbirths weighing $\geq 500$ g delivered > 20 weeks gestation recorded in McGill Obstetric and Neonatal Database (MOND) to mothers $\geq 18$ years of age with complete BMI data   | Assisted pregnancies conceived using intracervical insemination, in vitro maturation, and gamete intrafallopian tube transfer; multiple births | 10,013      | New-onset elevated blood pressure with proteinuria | Not reported                                                                |
| Di Lorenzo G 2012 | Italy     | Prospective cohort study, single hospital, 2007-2009        | Singleton pregnancies                                                                                                                                                                                    | Major fetal abnormalities, miscarriage, and termination of pregnancy                                                                           | 2,118       | New-onset elevated blood pressure with proteinuria | Lost to follow-up for unknown reasons (0.65%)                               |

| Citation        | Country       | Type and source of cohort, study period                                                                            | Maternal inclusion criteria                                                                                                                                                                                      | Maternal exclusion criteria                                                                                                                                                                                                                       | Cohort size | Definition of preeclampsia                         | Attrition due to study withdrawal or loss to follow-up (attrition rate [%]) |
|-----------------|---------------|--------------------------------------------------------------------------------------------------------------------|------------------------------------------------------------------------------------------------------------------------------------------------------------------------------------------------------------------|---------------------------------------------------------------------------------------------------------------------------------------------------------------------------------------------------------------------------------------------------|-------------|----------------------------------------------------|-----------------------------------------------------------------------------|
| Dokras A 2006   | United States | Retrospective cohort study, single centre and affiliated hospitals, 1995-2005                                      | Women < 38 years of age undergoing their first fresh conventional IVF or IVF with intracytoplasmic sperm injection (ICSI) cycle at the University of Iowa Hospitals and Clinics                                  | None stated                                                                                                                                                                                                                                       | 1,293       | None provided                                      | Due to incomplete delivery information (0.15%)                              |
| El-Chaar D 2013 | Canada        | Retrospective cohort study, single hospital, 2007-2010                                                             | Women who delivered a singleton infant at $\geq 20$ weeks' gestation between at The Ottawa Hospital with a known pre-pregnancy BMI (or height and pre-pregnancy weight)                                          | Underweight women (BMI < 18.5 kg/m <sup>2</sup> )                                                                                                                                                                                                 | 6,674       | New-onset elevated blood pressure with proteinuria | Due to incomplete outcome data (0.22%)                                      |
| Eras JL 2000    | United States | Prospective cohort study, eleven private obstetrical practices and two health maintenance organizations, 1988-1991 | Women who had their first prenatal visit between April 5, 1988, and December 31, 1991, and planned to deliver at Yale-New Haven Hospital with interview completed < 16 weeks' gestation and delivered singletons | Women with diabetes mellitus, non-English speakers                                                                                                                                                                                                | 2,739       | New-onset elevated blood pressure with proteinuria | Not reported                                                                |
| Erez O 2006     | Israel        | Retrospective cohort study, single hospital, 1988-2002                                                             | All twin deliveries at Soroka University Medical Center in the obstetrical database that comprised deliveries $\geq 22$ weeks gestation                                                                          | Patients with < 3 visits in a prenatal clinic                                                                                                                                                                                                     | 2,628       | New-onset elevated blood pressure with proteinuria | Not reported                                                                |
| Fortner RT 2009 | United States | Prospective cohort study, single hospital, 2000-2004                                                               | Women from Baystate Medical Center's public and midwifery clinics < 24 weeks' gestation who self-identified as Latina                                                                                            | Multiple gestation, pre-existing diabetes, hypertension, heart disease, chronic renal disease, use of medications thought to affect glucose tolerance, women <16 years or > 40 years, women who terminated their pregnancies or had a miscarriage | 1,043       | New-onset elevated blood pressure with proteinuria | Due to incomplete delivery information (14.8%)                              |

| Citation          | Country       | Type and source of cohort, study period                 | Maternal inclusion criteria                                                                                                                                                                             | Maternal exclusion criteria                                                                                                                                                                                                                                                                                                                             | Cohort size | Definition of preeclampsia                         | Attrition due to study withdrawal or loss to follow-up (attrition rate [%]) |
|-------------------|---------------|---------------------------------------------------------|---------------------------------------------------------------------------------------------------------------------------------------------------------------------------------------------------------|---------------------------------------------------------------------------------------------------------------------------------------------------------------------------------------------------------------------------------------------------------------------------------------------------------------------------------------------------------|-------------|----------------------------------------------------|-----------------------------------------------------------------------------|
| Frederick IO 2006 | United States | Prospective cohort study, two hospitals, 1996-2002      | Women who initiated prenatal care < 20 weeks gestation, were aged $\geq 18$ years, could speak English, planned to carry the pregnancy to term, planned to deliver at either of the two study hospitals | Women who were lost to follow-up, had an abortion or fetal demise < 28 weeks of gestation, had pregestational diabetes, had chronic or essential hypertension, or those with missing information on prepregnancy BMI and/or adult weight gain                                                                                                           | 1,644       | New-onset elevated blood pressure with proteinuria | Due to lost to follow-up (5.0%)                                             |
| Gaillard R 2011a  | Netherlands   | Prospective cohort study, single city, years not stated | Women enrolled in the Generation R study                                                                                                                                                                | Missing blood pressure measurements, induced abortions, loss to follow-up, twin pregnancies, and fetal death                                                                                                                                                                                                                                            | 8,623       | New-onset elevated blood pressure with proteinuria | Due to lost to follow-up (0.32%)                                            |
| Gaillard R 2011b  | Netherlands   | Prospective cohort study, single city, 2001-2005        | Women enrolled in the Generation R study                                                                                                                                                                | Missing prepregnancy BMI and/or blood pressure measurements, pre-existing hypertension, induced abortions, loss to follow-up, twin pregnancies, and fetal death                                                                                                                                                                                         | 6,902       | New-onset elevated blood pressure with proteinuria | Due to lost to follow-up (0.51%)                                            |
| Gaio DS 2001      | Brazil        | Prospective cohort study, six cities, 1991-1995         | Women aged $\geq 20$ years without a previous history of nonpregnancy-related diabetes mellitus                                                                                                         | Women who did not return for further consultations at the study sites or whose charts could not be localized, also excluded 557 women from the Rio de Janeiro center, it being a reference center for hypertensive disorders in pregnancy, women who did not return for further consultations at the study sites or whose charts could not be localized | 4,892       | New-onset elevated blood pressure with proteinuria | Due to incomplete delivery and postpartum period data (12%)                 |
| Gilbert WM 2007   | United States | Retrospective cohort study, single state, 1991-2001     | All women in California Office of Statewide Health Planning and Development, one birth per subject was randomly selected                                                                                | None stated                                                                                                                                                                                                                                                                                                                                             | 4,324,902   | ICD diagnostic codes                               | Not reported                                                                |

| Citation              | Country       | Type and source of cohort, study period                | Maternal inclusion criteria                                                                                                                                                                                | Maternal exclusion criteria                                                                                                                                  | Cohort size | Definition of preeclampsia                         | Attrition due to study withdrawal or loss to follow-up (attrition rate [%]) |
|-----------------------|---------------|--------------------------------------------------------|------------------------------------------------------------------------------------------------------------------------------------------------------------------------------------------------------------|--------------------------------------------------------------------------------------------------------------------------------------------------------------|-------------|----------------------------------------------------|-----------------------------------------------------------------------------|
| Goetzinger KR 2010    | United States | Retrospective cohort study, single hospital, 2003-2009 | All patients with singleton gestations who underwent first trimester screening for aneuploidy at Washington University Medical Center                                                                      | Cases of aneuploidy, women with outcome data unavailable                                                                                                     | 3,716       | New-onset elevated blood pressure with proteinuria | Due to incomplete outcome data (7.6%)                                       |
| Hauger MS 2008        | Argentina     | Prospective cohort study, ten hospitals, 2003-2006     | Women with pregnancies ending in a live birth or fetal death with $\geq 22$ weeks of gestation or birthweight $> 500g$                                                                                     | Fetuses with congenital malformations, multiples, missing information on maternal prepregnancy BMI                                                           | 46,964      | New-onset elevated blood pressure with proteinuria | Not reported                                                                |
| Hernandez-Diaz S 2009 | Sweden        | Nationwide prospective cohort study, 1987-2004         | Swedish women who had their first delivery on or after Jan. 1, 1987, with reproductive history followed until the end of 2004                                                                              | None stated                                                                                                                                                  | 1,430,464   | New-onset elevated blood pressure with proteinuria | Not reported                                                                |
| Jacobsson B 2004      | Sweden        | Nationwide prospective cohort study, 1987-2001         | All deliveries in women aged 40-44 and $\geq 45$ years and in a control group of women aged 20-29 years in the Swedish Medical Birth Register (MBR)                                                        | None stated                                                                                                                                                  | 909,228     | ICD diagnostic codes                               | Not reported                                                                |
| Jie Z 2015            | China         | Prospective cohort study, single hospital, 2010-2013   | Women at Xiangya Hospital, Central South University whose first visit was $\leq 12$ weeks of gestation, identification of intrauterine pregnancy, regular antenatal examination                            | Chronic hypertension, diabetes, kidney disease, hepatitis before pregnancy, family history of hereditary or chromosomal abnormalities in each of the couples | 4,087       | New-onset elevated blood pressure with proteinuria | Not reported                                                                |
| Johnston R 2015       | United States | Retrospective cohort study, single state, 2009         | All pregnancies in the California health discharge dataset that were conceived by ART, according to ICD-9 codes, as well as natural conception controls; full age and race/ethnicity information available |                                                                                                                                                              | 407,436     | ICD diagnostic codes                               | Not reported                                                                |

| Citation         | Country                              | Type and source of cohort, study period                       | Maternal inclusion criteria                                                                                                                                   | Maternal exclusion criteria                                                                                                                                                                                                                                                                                                                                                                                                                                                                   | Cohort size | Definition of preeclampsia                         | Attrition due to study withdrawal or loss to follow-up (attrition rate [%]) |
|------------------|--------------------------------------|---------------------------------------------------------------|---------------------------------------------------------------------------------------------------------------------------------------------------------------|-----------------------------------------------------------------------------------------------------------------------------------------------------------------------------------------------------------------------------------------------------------------------------------------------------------------------------------------------------------------------------------------------------------------------------------------------------------------------------------------------|-------------|----------------------------------------------------|-----------------------------------------------------------------------------|
| Kenny LC 2014    | New Zealand, United Kingdom, Ireland | Prospective cohort study, three countries, 2004-2011          | Nulliparous women with singleton pregnancies recruited to the Screening for Pregnancy Endpoints (SCOPE) study                                                 | 1) Increased risk of preeclampsia, small for gestational age (SGA) or spontaneous preterm birth due to underlying medical conditions such as diabetes, chronic kidney disease or pre-existing chronic hypertension, previous cervical knife cone biopsy, $\geq 3$ terminations or $\geq 3$ miscarriages or current ruptured membranes; 2) known major fetal anomaly or abnormal karyotype or 3) intervention that may modify pregnancy outcome such as treatment with aspirin or progesterone | 5,623       | New-onset elevated blood pressure with proteinuria | 1.2%                                                                        |
| Kerrigan AM 2010 | England                              | Retrospective cohort study, single region, 2006               | All women who gave birth at the National Health Service trust                                                                                                 | Multiple pregnancies                                                                                                                                                                                                                                                                                                                                                                                                                                                                          | 8,176       | None provided                                      | Not reported                                                                |
| Khalil A 2013    | United Kingdom                       | Retrospective cohort study, three hospitals, years not stated | Women attending for their first routine hospital antenatal visit at King's College Hospital, University College London Hospitals, or Medway Maritime Hospital | Pregnancies with fetal aneuploidies or major defects diagnosed either prenatally or in the neonatal period, pregnancies ending in termination for psychosocial reasons, no or incomplete data on pregnancy outcome                                                                                                                                                                                                                                                                            | 76,158      | New-onset elevated blood pressure with proteinuria | Not reported                                                                |

| Citation                  | Country       | Type and source of cohort, study period                            | Maternal inclusion criteria                                                                                                                                                                                                                                                   | Maternal exclusion criteria                                                                                                                                                          | Cohort size | Definition of preeclampsia                         | Attrition due to study withdrawal or loss to follow-up (attrition rate [%]) |
|---------------------------|---------------|--------------------------------------------------------------------|-------------------------------------------------------------------------------------------------------------------------------------------------------------------------------------------------------------------------------------------------------------------------------|--------------------------------------------------------------------------------------------------------------------------------------------------------------------------------------|-------------|----------------------------------------------------|-----------------------------------------------------------------------------|
| Kuivasaari-Pirinen P 2012 | Finland       | Retrospective cohort study, single hospital, 1996-2007             | First singleton ART pregnancies and spontaneous singleton pregnancies in the general population at the University Hospital of Kuopio, Finland; pregnancies were restricted to those that proceeded to delivery ( $\geq 22$ weeks of gestation or birthweight of $\geq 500$ g) | Pregnancies with major fetal malformations                                                                                                                                           | 27,125      | New-onset elevated blood pressure with proteinuria | Not reported                                                                |
| Lee CJ 2000               | Taiwan        | Retrospective cohort study, single hospital, 1990-1998             | Women delivering at Chang Gung Memorial Hospital                                                                                                                                                                                                                              | Pregnancies complicated with chronic hypertension (prepregnancy diagnosis or diagnosis $< 20$ weeks gestation) and fetal malformations (structural or chromosomal)                   | 29,735      | New-onset elevated blood pressure with proteinuria | Not reported                                                                |
| Li DK 2000                | United States | Retrospective cohort study, single state, 1989-1991                | Women with two consecutive singleton births, identified through linking annual California birth certificate data (matching probability of $\geq 95$ percent for maternal day and month of birth and 90 percent for race/ethnicity)                                            | Linked records with an interval between two birthdays of $< 20$ weeks, missing data for paternal surname and date of birth, missing data for either pregnancy or labor complications | 140,147     | New-onset elevated blood pressure with proteinuria | Not reported                                                                |
| Liu S 2011                | Canada        | Retrospective cohort study, all provinces except Quebec, 2003-2009 | All hospital deliveries and newborn discharges in the Discharge Abstract Database of the Canadian Institute for Health Information                                                                                                                                            | None stated                                                                                                                                                                          | 1,910,729   | ICD diagnostic codes                               | Not reported                                                                |
| Liu X 2011                | China         | Retrospective cohort study, three hospitals, 2007-2009             | Singleton nulliparous pregnancies delivered at Maternal and Child Health hospital, Chinese People's Liberation Army Hospital 202, and Shengjing Hospital of China Medical University, Shengyang                                                                               | Women who booked after 12 weeks and had a history of hypertension and diabetes                                                                                                       | 5,047       | None provided                                      | Not reported                                                                |



| Citation          | Country       | Type and source of cohort, study period                              | Maternal inclusion criteria                                                                                                                                                                                                                                                                                                                                                                                                                                                                                                                             | Maternal exclusion criteria                                                                                                                                          | Cohort size | Definition of preeclampsia                         | Attrition due to study withdrawal or loss to follow-up (attrition rate [%]) |
|-------------------|---------------|----------------------------------------------------------------------|---------------------------------------------------------------------------------------------------------------------------------------------------------------------------------------------------------------------------------------------------------------------------------------------------------------------------------------------------------------------------------------------------------------------------------------------------------------------------------------------------------------------------------------------------------|----------------------------------------------------------------------------------------------------------------------------------------------------------------------|-------------|----------------------------------------------------|-----------------------------------------------------------------------------|
| Luke B 2004       | United States | Historical cohort study, four hospitals, 1990-2002                   | Twin deliveries born alive at $\geq 24$ weeks gestation (as determined by last menstrual period, first-trimester ultrasonography, or best obstetric estimate - a combination of clinical and ultrasonographic estimates), documented sexes and birthweights of both infants in the pair, absence of major congenital anomalies (as documented by normal findings in the newborn medical record), and maternal height, pregravid weight, and $\geq 3$ prenatal weights, with the first $\leq 20$ weeks' gestation and the last within 1 week of delivery | None stated                                                                                                                                                          | 2,567       | None provided                                      | Not reported                                                                |
| Magnussen EB 2007 | Norway        | Prospective cohort study, single region, 1995-2005                   | Women $> 20$ years of age in the Nord-Trøndelag health study (HUNT-2) who gave birth to a singleton with a gestational age of $> 22$ weeks or birthweight $> 500g$ , $\geq 9$ months after the baseline study                                                                                                                                                                                                                                                                                                                                           | Women pregnant during the survey, women who had not attended the clinical examination in the Nord-Trøndelag health study (only participated with questionnaire data) | 3,494       | New-onset elevated blood pressure with proteinuria | Not reported                                                                |
| Mahande MJ 2013   | Tanzania      | Prospective cohort study, single hospital, 2000-2008                 | Women from the natural catchment area of Kilimanjaro Christian Medical Centre who delivered singletons and $\geq 1$ subsequent delivery recorded in the medical birth registry                                                                                                                                                                                                                                                                                                                                                                          | Women who were referred from more distant areas for various medical reasons, multiple gestations                                                                     | 3,909       | New-onset elevated blood pressure with proteinuria | Not reported                                                                |
| Martin CL 2000    | Scotland      | Retrospective cohort study, single hospital, 1969-1971 and 1976-1997 | All twin pregnancies delivered at Aberdeen Maternity Hospital                                                                                                                                                                                                                                                                                                                                                                                                                                                                                           | None stated                                                                                                                                                          | 1,575       | New-onset elevated blood pressure with proteinuria | Not reported                                                                |

| Citation          | Country       | Type and source of cohort, study period              | Maternal inclusion criteria                                                                                                                                                                                                                                          | Maternal exclusion criteria                                                                                                                                                                                                                            | Cohort size | Definition of preeclampsia                         | Attrition due to study withdrawal or loss to follow-up (attrition rate [%]) |
|-------------------|---------------|------------------------------------------------------|----------------------------------------------------------------------------------------------------------------------------------------------------------------------------------------------------------------------------------------------------------------------|--------------------------------------------------------------------------------------------------------------------------------------------------------------------------------------------------------------------------------------------------------|-------------|----------------------------------------------------|-----------------------------------------------------------------------------|
| Mbah AK 2010      | United States | Retrospective cohort study, single state, 1989-2005  | All singleton livebirths between 20 and 44 weeks of gestation in the state of Missouri                                                                                                                                                                               | Missing maternal prepregnancy BMI, missing birthweight, missing information on preeclampsia and eclampsia, women with chronic hypertension, women who were underweight (BMI < 18.5 kg/m <sup>2</sup> ) and overweight (BMI 25–29.9 kg/m <sup>2</sup> ) | 854,085     | New-onset elevated blood pressure with proteinuria | Due to incomplete outcome data about preeclampsia (0.08%)                   |
| Melamed N 2012    | Israel        | Retrospective cohort study, single center, 1996-2008 | All nulliparous women who were diagnosed with preeclampsia (PET) and a control group of age-matched women                                                                                                                                                            | Cases in the PET or control group complicated by delivery < 24 gestational weeks, birthweight < 500 g, and fetal malformations or hydrops                                                                                                              | 2,400       | New-onset elevated blood pressure with proteinuria | Not reported                                                                |
| Munkhaugen J 2009 | Norway        | Prospective cohort study, single region, 1995-2005   | All women aged ≥ 20 attending the Second Health Study in Nord-Trøndelag, Norway (1995–97) and subsequent pregnancies registered in the Medical Birth Registry who gave birth to a singleton with GA of > 22 weeks or birthweight > 500g, ≥ 9mos after baseline study | Women without clinical data, twin pregnancies, women who delivered ≤ 9 months after attending HUNT 2                                                                                                                                                   | 5,655       | New-onset elevated blood pressure with proteinuria | Not reported                                                                |

| Citation       | Country       | Type and source of cohort, study period                 | Maternal inclusion criteria                                                                                                                                                                                                                                                                                                                                                                                                                                                                                                                                                  | Maternal exclusion criteria                                                                                                                                                                                                                                                                 | Cohort size | Definition of preeclampsia                         | Attrition due to study withdrawal or loss to follow-up (attrition rate [%]) |
|----------------|---------------|---------------------------------------------------------|------------------------------------------------------------------------------------------------------------------------------------------------------------------------------------------------------------------------------------------------------------------------------------------------------------------------------------------------------------------------------------------------------------------------------------------------------------------------------------------------------------------------------------------------------------------------------|---------------------------------------------------------------------------------------------------------------------------------------------------------------------------------------------------------------------------------------------------------------------------------------------|-------------|----------------------------------------------------|-----------------------------------------------------------------------------|
| Ness RB 2008   | United States | Retrospective cohort study, twelve hospitals, 1959-1965 | Women who received prenatal care at one of twelve hospitals part of the Collaborative Perinatal Project, and had singleton pregnancies of $\geq 20$ weeks gestation with their first (primigravid) pregnancy registered in the first or second trimester by menstrual dating, with $\geq 3$ prenatal visits, and who had information on main exposures and outcomes of interest including smoking, weight, height, birthweight, and gestational age at delivery (calculated as the number of days between the reported date of the last menstrual period and the birth date) | Any of the following conditions before or during pregnancy: thrombosis, phlebitis, history of coagulation defects, diabetes mellitus, glomerulonephritis, and hydramnios; women with chronic hypertension or renal disease; women for whom these or smoking data were missing; past smokers | 7,757       | New-onset elevated blood pressure with proteinuria | Not reported                                                                |
| Ngowa JDK 2013 | Cameroon      | Retrospective cohort study, two hospitals, 2007-2011    | All consecutive women aged $\geq 40$ who delivered singletons at Yaounde General Hospital or Yaounde Gynecology, Obstetrics and Pediatrics Hospital, as well as three controls aged 20-29 following each "case" birth                                                                                                                                                                                                                                                                                                                                                        | None stated                                                                                                                                                                                                                                                                                 | 2,401       | None provided                                      | Not reported                                                                |
| Nili F 2013    | Canada        | Retrospective cohort study, single province, 1988-2008  | Women in the Nova Scotia Atlee Perinatal Database, which records information for all births $> 20$ weeks gestation                                                                                                                                                                                                                                                                                                                                                                                                                                                           | Women with rheumatologic disease as coded in the Atlee Database including systemic lupus erythematosus, rheumatoid arthritis, Sjogren's syndrome, ankylosing spondylitis, and scleroderma                                                                                                   | 211,034     | None provided                                      | Not reported                                                                |

| Citation              | Country        | Type and source of cohort, study period                | Maternal inclusion criteria                                                                                                                                                                                                                       | Maternal exclusion criteria                                                                                                                                                                                                                                                                                                                                                                                                                                                          | Cohort size | Definition of preeclampsia                         | Attrition due to study withdrawal or loss to follow-up (attrition rate [%]) |
|-----------------------|----------------|--------------------------------------------------------|---------------------------------------------------------------------------------------------------------------------------------------------------------------------------------------------------------------------------------------------------|--------------------------------------------------------------------------------------------------------------------------------------------------------------------------------------------------------------------------------------------------------------------------------------------------------------------------------------------------------------------------------------------------------------------------------------------------------------------------------------|-------------|----------------------------------------------------|-----------------------------------------------------------------------------|
| Ohkuchi A 2006        | Japan          | Retrospective cohort study, single hospital, 1996-1999 | Women who sought antenatal care < 14 weeks of gestation and gave birth to singleton infants at $\geq 22$ weeks gestation at Jichi Medical University Hospital                                                                                     | Women who had preeclampsia during the first trimester of pregnancy, women with unclear prepregnancy weight                                                                                                                                                                                                                                                                                                                                                                           | 1,518       | New-onset elevated blood pressure with proteinuria | Not reported                                                                |
| Oken E 2007           | United States  | Prospective cohort study, single practice, 1999-2002   | Women in Project Viva, which recruited women attending their initial prenatal visit at one of the offices of Harvard Vanguard Medical Associates and who delivered at either Brigham and Women's Hospital or Beth Israel Deaconess Medical Center | Participants with outpatient medical records not available for review, women who did not complete the first-trimester dietary questionnaire, women with pre-existing chronic hypertension who did not develop PE, or women with missing covariate information; multiple gestation (twins, triplets, etc.), inability to answer questions in English, plan to move out of the area before delivery, and gestational age > 22 completed weeks at initial prenatal clinical appointment | 1,718       | New-onset elevated blood pressure with proteinuria | Due to unavailable outpatient medical records (2.1%)                        |
| Ostlund I 2004        | Sweden         | Nationwide prospective cohort study, 1992-1996         | All women who had given birth to singletons registered in the Swedish Medical Birth Register (MBR) with information about prepregnancy weight and height                                                                                          | Women with pre-existing diabetes, women missing information on prepregnancy body weight and height                                                                                                                                                                                                                                                                                                                                                                                   | 430,852     | ICD diagnostic codes                               | Not reported                                                                |
| Ovesen P 2011         | Denmark        | Nationwide prospective cohort study, 2004-2010         | All women carrying and giving birth to a singleton, according to the Danish Medical Birth Registry (MBR)                                                                                                                                          | Double entry into the MBR, obviously incorrect data registrations, birthweight plus or minus four standard deviations, data for BMI missing                                                                                                                                                                                                                                                                                                                                          | 369,347     | ICD diagnostic codes                               | Not reported                                                                |
| Papageorghiou AT 2005 | United Kingdom | Prospective cohort study, ten hospitals, 1999-2002     | Unselected women with singleton pregnancies attending for routine antenatal care at one of the ten centers                                                                                                                                        | Incomplete outcome data, major fetal defect                                                                                                                                                                                                                                                                                                                                                                                                                                          | 16,806      | New-onset elevated blood pressure with proteinuria | Due to incomplete outcome data (3.9%)                                       |

| Citation       | Country       | Type and source of cohort, study period                | Maternal inclusion criteria                                                                                                                                                                                                                                                   | Maternal exclusion criteria                                                                                                                                                                                                                                             | Cohort size | Definition of preeclampsia                         | Attrition due to study withdrawal or loss to follow-up (attrition rate [%])    |
|----------------|---------------|--------------------------------------------------------|-------------------------------------------------------------------------------------------------------------------------------------------------------------------------------------------------------------------------------------------------------------------------------|-------------------------------------------------------------------------------------------------------------------------------------------------------------------------------------------------------------------------------------------------------------------------|-------------|----------------------------------------------------|--------------------------------------------------------------------------------|
| Pare E 2014    | United States | Prospective cohort study, three centers, 2006-2008     | Women in the BIRTH study: $\geq$ 16 years, presented for prenatal care < 15 weeks of gestation, and carried $\leq$ 3 fetuses; delivered at Beth Israel Deaconess, Brigham and Women's Hospital, or University of Pennsylvania Hospital                                        | Spontaneous or induced termination of pregnancy; transfer of care, moved or delivered at another hospital; sponsor request or decision; participant missed two study visits or more; participant withdrew consent; lost to follow-up or incomplete delivery data; other | 2,637       | New-onset elevated blood pressure with proteinuria | Due to withdrawn consent, lost to follow-up or incomplete delivery data (3.6%) |
| Park JH 2011   | Korea         | Retrospective cohort study, single hospital, 2005-2007 | Women who delivered live singleton babies between 28 and 42 weeks of gestation at Ewha Women's University Hospital                                                                                                                                                            | Missing data for pre-pregnancy height and weight, history of hypertension or diabetes, twin pregnancy, fetus with a known congenital anomaly, stillbirth, and previous cesarean section                                                                                 | 2,311       | New-onset elevated blood pressure with proteinuria | Not reported                                                                   |
| Persson M 2012 | Sweden        | Nationwide prospective cohort study, 1998-2007         | Births recorded in the Swedish Medical Birth Register (MBR): Infants from singleton pregnancies and born to mothers with T1DM (study cohort), singleton pregnancies to mothers without a diagnosis of diabetes and born in the same time as the study cohort (control cohort) | Missing data on BMI, records with extreme values on maternal age, maternal weight, or maternal height, records with extreme values for birthweight or length                                                                                                            | 767,955     | New-onset elevated blood pressure with proteinuria | Not reported                                                                   |

| Citation         | Country        | Type and source of cohort, study period                   | Maternal inclusion criteria                                                                                                                                                                                                                                                                                                                                                                   | Maternal exclusion criteria                                                                                                                                                                                                                                                                                                                                                                         | Cohort size | Definition of preeclampsia                         | Attrition due to study withdrawal or loss to follow-up (attrition rate [%]) |
|------------------|----------------|-----------------------------------------------------------|-----------------------------------------------------------------------------------------------------------------------------------------------------------------------------------------------------------------------------------------------------------------------------------------------------------------------------------------------------------------------------------------------|-----------------------------------------------------------------------------------------------------------------------------------------------------------------------------------------------------------------------------------------------------------------------------------------------------------------------------------------------------------------------------------------------------|-------------|----------------------------------------------------|-----------------------------------------------------------------------------|
| Plasencia W 2007 | United Kingdom | Prospective cohort study, single centre, years not stated | Singleton pregnancies delivered by women attending the Harris Birthright Research Centre for Fetal Medicine for routine assessment of risk for chromosomal abnormalities by measurement of fetal nuchal translucency (NT) thickness and maternal serum free beta-human chorionic gonadotropin ( $\beta$ -hCG) and pregnancy-associated plasma protein-A (PAPP-A) at 11 to 13 weeks' gestation | Missing outcome data, major fetal defect, pregnancies that resulted in death or miscarriage < 24 weeks' gestation, pregnancies terminated for fetal abnormalities or social reasons                                                                                                                                                                                                                 | 6,015       | New-onset elevated blood pressure with proteinuria | Due to incomplete outcome data (5.2%)                                       |
| Plasencia W 2008 | United Kingdom | Prospective cohort study, single centre, years not stated | Singleton pregnancies delivered by women attending the Harris Birthright Research Centre for Fetal Medicine at King's College Hospital for routine antenatal care                                                                                                                                                                                                                             | Missing outcome data, major fetal defect, pregnancies that resulted in death or miscarriage, pregnancies in which there was $\geq 1$ episode of hypertension but on the basis of the available data it was not possible to determine whether the diagnosis was gestational hypertension, preeclampsia, or neither                                                                                   | 3,107       | New-onset elevated blood pressure with proteinuria | Due to incomplete outcome data (4.7%)                                       |
| Poon LCY 2010    | United Kingdom | Prospective cohort study, single centre, 2006-2007        | Women attending for their routine first hospital visit in pregnancy at Harris Birthright Research Centre for Fetal Medicine/King's College Hospital                                                                                                                                                                                                                                           | Missing outcome data, major fetal defect or aneuploidy, pregnancies resulted in fetal death or miscarriage < 24 weeks of gestation, pregnancies terminated for social reasons, pregnancies in which there was $\geq 1$ episode of hypertension but on the basis of the available data it was not possible to determine whether the diagnosis was gestational hypertension, preeclampsia, or neither | 8,366       | New-onset elevated blood pressure with proteinuria | Due to incomplete outcome data (4.8%)                                       |

| Citation                  | Country       | Type and source of cohort, study period                | Maternal inclusion criteria                                                                                                                                                                                   | Maternal exclusion criteria                                                                                                                                                                                         | Cohort size | Definition of preeclampsia                         | Attrition due to study withdrawal or loss to follow-up (attrition rate [%]) |
|---------------------------|---------------|--------------------------------------------------------|---------------------------------------------------------------------------------------------------------------------------------------------------------------------------------------------------------------|---------------------------------------------------------------------------------------------------------------------------------------------------------------------------------------------------------------------|-------------|----------------------------------------------------|-----------------------------------------------------------------------------|
| Ramos GA 2005             | United States | Retrospective cohort study, single center, 1981-2001   | All women delivering cephalic, singleton fetuses at the University of California, San Francisco Medical Centre                                                                                                | Multiple gestations, fetal anomalies, women with a caesarean before the onset of labor (caesarean for herpes simplex virus [HSV], noncephalic presentation, elective repeat, and previa)                            | 22,658      | New-onset elevated blood pressure with proteinuria | Not reported                                                                |
| Rasmussen S 2000          | Norway        | Nationwide prospective cohort study, 1967-1992         | Women who had their first and second births recorded in the Norwegian Medical Birth Register, with gestational ages $\geq 16$ weeks                                                                           | Women who only had one delivery during the study period, a first delivery before 1967, sibships with multiple births, those without information on the first day of the last menstrual period in $\geq 1$ pregnancy | 370,374     | New-onset elevated blood pressure with proteinuria | Not reported                                                                |
| Rasmussen S 2007          | Norway        | Nationwide prospective cohort study, 1967-2005         | Births recorded in the Norwegian Medical Birth Register: all live births and abortions $\geq 16$ weeks gestation                                                                                              | Sibships with multiple births and women with their first births before 1967                                                                                                                                         | 119,518     | New-onset elevated blood pressure with proteinuria | Not reported                                                                |
| Rode L 2005               | Denmark       | Prospective cohort study, three hospitals, 1998-2001   | Women with single, cephalic, term ( $\geq 37$ weeks or later) deliveries participating in the Copenhagen First Trimester Study with a registered prepregnancy BMI                                             | Women presenting $> 15$ weeks gestational age                                                                                                                                                                       | 9,122       | New-onset elevated blood pressure with proteinuria | Not reported                                                                |
| Saereeporncharukul K 2011 | Thailand      | Retrospective cohort study, single hospital, 2009      | All women that gave birth at the Department of Obstetrics and Gynecology, Rajavithi Hospital, and who attended antenatal care, had complete baseline maternal clinical information and pertinent outcome data | Deliveries with incomplete data                                                                                                                                                                                     | 3,715       | ICD diagnostic codes                               | Not reported                                                                |
| Salem Yaniv S 2011        | Israel        | Retrospective cohort study, single hospital, 1995-2005 | All singleton births to nulliparous women at Soroka University Medical Center                                                                                                                                 | None stated                                                                                                                                                                                                         | 45,033      | None provided                                      | Not reported                                                                |

| Citation           | Country        | Type and source of cohort, study period                | Maternal inclusion criteria                                                                                                                    | Maternal exclusion criteria                                                                                                                                                                                                                                     | Cohort size | Definition of preeclampsia                         | Attrition due to study withdrawal or loss to follow-up (attrition rate [%])               |
|--------------------|----------------|--------------------------------------------------------|------------------------------------------------------------------------------------------------------------------------------------------------|-----------------------------------------------------------------------------------------------------------------------------------------------------------------------------------------------------------------------------------------------------------------|-------------|----------------------------------------------------|-------------------------------------------------------------------------------------------|
| Salihu HM 2011     | United States  | Retrospective cohort study, single state, 1989-2005    | Singleton live births with gestational age 34 to 42 weeks in Missouri                                                                          | Multiple gestations, birthweight < 4000g, mothers with pregnancies outside of study period, stillbirth, missing maternal BMI, missing records on obstetric and medical complications, missing records of neonatal complications at birth and method of delivery | 116,976     | New-onset elevated blood pressure with proteinuria | Due to missing records on obstetrical, maternal medical or neonatal complications (0.01%) |
| Sandvik MK 2010    | Norway         | Nationwide retrospective cohort study, 1967-2004       | ≤ 3 pregnancies for all women who gave birth to their first child between 1967 and 1994                                                        | Women with multiple deliveries                                                                                                                                                                                                                                  | 639,018     | New-onset elevated blood pressure with proteinuria | Not reported                                                                              |
| Schneider S 2011   | Germany        | Nationwide retrospective cohort study, 2006            | All hospital births recorded in the German Perinatal Quality Registry                                                                          | None stated                                                                                                                                                                                                                                                     | 647,385     | New-onset elevated blood pressure with proteinuria | Not reported                                                                              |
| Sebire NJ 2001     | United Kingdom | Retrospective cohort study, single region, 1989-1997   | Completed singleton pregnancies in the St. Mary's Maternity Information System (SMMIS) database                                                | Women with BMI < 20 kg/m <sup>2</sup>                                                                                                                                                                                                                           | 287,213     | None provided                                      | Not reported                                                                              |
| Shevell T 2005     | United States  | Prospective cohort study, multiple centers, 1999-2002  | Women with singleton pregnancies from an unselected obstetric population in the First and Second Trimester Evaluation of Risk (FASTER) trial   | None stated                                                                                                                                                                                                                                                     | 36,062      | New-onset elevated blood pressure with proteinuria | Not reported                                                                              |
| Silberstein T 2014 | Israel         | Retrospective cohort study, single hospital, 1988-2006 | Singleton pregnancies conceived by in vitro fertilization, ovulation induction, and spontaneous conception at Soroka University Medical Center | None stated                                                                                                                                                                                                                                                     | 175,572     | None provided                                      | Not reported                                                                              |



| Citation          | Country       | Type and source of cohort, study period                | Maternal inclusion criteria                                                                                                                                                                    | Maternal exclusion criteria                                                                                                                                                                                                                                                                                                                                                                                                                                                                                                                                  | Cohort size | Definition of preeclampsia                         | Attrition due to study withdrawal or loss to follow-up (attrition rate [%]) |
|-------------------|---------------|--------------------------------------------------------|------------------------------------------------------------------------------------------------------------------------------------------------------------------------------------------------|--------------------------------------------------------------------------------------------------------------------------------------------------------------------------------------------------------------------------------------------------------------------------------------------------------------------------------------------------------------------------------------------------------------------------------------------------------------------------------------------------------------------------------------------------------------|-------------|----------------------------------------------------|-----------------------------------------------------------------------------|
| Sohlberg S 2012   | Sweden        | Nationwide prospective cohort study, 1992-2006         | Primiparous women born in the Nordic countries (Sweden, Norway, Denmark, Finland, or Iceland) who delivered a singleton infant in gestational week $\geq 22$ , without congenital malformation | Women with gestational hypertension                                                                                                                                                                                                                                                                                                                                                                                                                                                                                                                          | 503,179     | New-onset elevated blood pressure with proteinuria | Not reported                                                                |
| Steinfeld JD 2000 | United States | Retrospective cohort, single hospital, 1994-1997       | All clinic patients delivering a single gestation                                                                                                                                              | None stated                                                                                                                                                                                                                                                                                                                                                                                                                                                                                                                                                  | 2,424       | New-onset elevated blood pressure with proteinuria | Not reported                                                                |
| Sun LM 2009       | Canada        | Retrospective cohort study, single province, 2004-2007 | All patients with singleton pregnancies in the Ontario Niday Perinatal Database                                                                                                                | Patients with multiple gestations, maternal health problems, and fetal anomalies (health problems include: alcohol dependence syndrome, asthma, chronic hypertension (hypertension that predates the pregnancy or was diagnosed $< 20$ weeks gestation), insulin-dependent and non-insulin-dependent diabetes mellitus, heart disease (any pre-existing cardiac disease including dysrhythmia, congenital anomalies, etc.), hepatitis B, human immunodeficiency virus (HIV), lupus, psychiatric disorder, thyroid disease (hypothyroidism, hyperthyroidism)) | 10,538      | None provided                                      | Not reported                                                                |
| Suzuki S 2009     | Japan         | Retrospective cohort study, single hospital, 2001-2007 | All deliveries at $\geq 22$ weeks' gestation managed at the Japanese Red Cross Katsushika Maternity Hospital                                                                                   | Patients with chronic hypertension, renal disease, and systemic illnesses                                                                                                                                                                                                                                                                                                                                                                                                                                                                                    | 11,904      | New-onset elevated blood pressure with proteinuria | Not reported                                                                |

| Citation        | Country      | Type and source of cohort, study period                     | Maternal inclusion criteria                                                                                                                                                                                                                                         | Maternal exclusion criteria                                                                                                                                                                 | Cohort size | Definition of preeclampsia                         | Attrition due to study withdrawal or loss to follow-up (attrition rate [%]) |
|-----------------|--------------|-------------------------------------------------------------|---------------------------------------------------------------------------------------------------------------------------------------------------------------------------------------------------------------------------------------------------------------------|---------------------------------------------------------------------------------------------------------------------------------------------------------------------------------------------|-------------|----------------------------------------------------|-----------------------------------------------------------------------------|
| Tandberg A 2015 | Norway       | Nationwide retrospective cohort study, 1988-2009            | Index and subsequent pregnancies delivered by women in the Medical Birth Register of Norway                                                                                                                                                                         | Multiple pregnancies (excluded from main analysis only)                                                                                                                                     | 617,615     | New-onset elevated blood pressure with proteinuria | Not reported                                                                |
| Thomson F 2005  | Scotland     | Retrospective cohort study, single hospital, 1989-1999      | Cases: women in the Aberdeen City District and attending the fertility clinic who went on to have singleton pregnancies (Aberdeen Fertility Clinic Database); controls: women who delivered singletons in the same period (Aberdeen Maternal and Neonatal Databank) | Multiple pregnancies, insufficient data                                                                                                                                                     | 23,125      | None provided                                      | Not reported                                                                |
| Voigt M 2008    | Germany      | Retrospective cohort study, eight federal states, 1998-2000 | Singleton pregnancies taken from the German perinatal statistics                                                                                                                                                                                                    | None stated                                                                                                                                                                                 | 499,267     | None provided                                      | Not reported                                                                |
| Wahabi HA 2014  | Saudi Arabia | Retrospective cohort study, single hospital, 2011-2012      | Women at King Khalid University Hospital who delivered singletons of gestational age $\geq$ 37 weeks at delivery, and whose documented records of maternal weight and height at the booking visit were available                                                    | Documented history of type I or type II diabetes mellitus prior to the index pregnancy, multiple pregnancy, women who were not screened for gestational diabetes during the index pregnancy | 2,701       | None provided                                      | Not reported                                                                |

| Citation       | Country        | Type and source of cohort, study period                            | Maternal inclusion criteria                                                                                                                                                                                                                                                                                                                                                                                                                                                                                                                              | Maternal exclusion criteria                                                                                                                                                                                                                             | Cohort size | Definition of preeclampsia                         | Attrition due to study withdrawal or loss to follow-up (attrition rate [%]) |
|----------------|----------------|--------------------------------------------------------------------|----------------------------------------------------------------------------------------------------------------------------------------------------------------------------------------------------------------------------------------------------------------------------------------------------------------------------------------------------------------------------------------------------------------------------------------------------------------------------------------------------------------------------------------------------------|---------------------------------------------------------------------------------------------------------------------------------------------------------------------------------------------------------------------------------------------------------|-------------|----------------------------------------------------|-----------------------------------------------------------------------------|
| Walker MC 2004 | Canada         | Retrospective cohort study, all provinces except Quebec, 1984-2000 | All records for obstetric deliveries contained in the Discharge Abstract Database collected by the Canadian Institute of Health Information; exposed: all pregnant women with twin or higher order multiples, controls: next four available women with a single gestation (non-exposed) matched by institution of hospitalisation for delivery (same; individual match), year of discharge (within two years except fiscal 1984/1985; individual match), age (within five years; frequency match) and postal codes (first three digits; frequency match) | None stated                                                                                                                                                                                                                                             | 4,395,968   | ICD diagnostic codes                               | Not reported                                                                |
| Weiss JL 2004  | United States  | Prospective cohort study, multiple centers, years not stated       | Women with singleton pregnancies from an unselected obstetric population in the First and Second Trimester Evaluation of Risk (FASTER) trial                                                                                                                                                                                                                                                                                                                                                                                                             | None stated                                                                                                                                                                                                                                             | 16,102      | New-onset elevated blood pressure with proteinuria | Not reported                                                                |
| Wright D 2012  | United Kingdom | Prospective cohort study, single centre, 2006-2010                 | Singleton pregnancy undergoing first-trimester combined screening for aneuploidy and subsequently delivering a phenotypically normal live birth or stillbirth $\geq$ 24 weeks' gestation                                                                                                                                                                                                                                                                                                                                                                 | Pregnancies with aneuploidies, major fetal abnormalities, and those ending in termination, miscarriage, or fetal death < 24 weeks, pregnancies delivering small for gestational age infants in the absence of PE, pregnancies with missing outcome data | 58,884      | New-onset elevated blood pressure with proteinuria | Due to incomplete outcome data (3.2%)                                       |
| Xiong X 2000   | Canada         | Retrospective cohort study, thirty-nine hospitals, 1995-1997       | Singleton pregnancies from the Northern and Central Alberta Perinatal Audit and Education Program                                                                                                                                                                                                                                                                                                                                                                                                                                                        | Women with pre-pregnancy or chronic hypertension, heart disease, chronic renal disease, gestational hypertension without proteinuria                                                                                                                    | 55,542      | New-onset elevated blood pressure with proteinuria | Not reported                                                                |

| Citation           | Country | Type and source of cohort, study period                     | Maternal inclusion criteria                                                                                                                                                                                                                                | Maternal exclusion criteria                                                                                                                                                                                                                           | Cohort size | Definition of preeclampsia                         | Attrition due to study withdrawal or loss to follow-up (attrition rate [%]) |
|--------------------|---------|-------------------------------------------------------------|------------------------------------------------------------------------------------------------------------------------------------------------------------------------------------------------------------------------------------------------------------|-------------------------------------------------------------------------------------------------------------------------------------------------------------------------------------------------------------------------------------------------------|-------------|----------------------------------------------------|-----------------------------------------------------------------------------|
| Xiong X 2002       | Canada  | Retrospective cohort study, forty-nine hospitals, 1993-1999 | Participants from the Northern and Central Alberta Perinatal Audit and Education Program                                                                                                                                                                   | Patients who had a history of heart disease, prepregnancy hypertension, gestational hypertension, chronic renal disease, major fetal anomalies in previous or current pregnancy, cases without antenatal information or with inconsistent information | 129,541     | New-onset elevated blood pressure with proteinuria | Not reported                                                                |
| Yogev Y 2010       | Israel  | Retrospective cohort study, single hospital, 2000-2008      | Women at the Helen Schneider Hospital for Women who were $\geq 45$ years of age at the time of delivery (exposed), as well as three groups of control women who were 20-29, 30-39, and 40-44 years old; pregnancies that reached $\geq 24$ weeks gestation | None stated                                                                                                                                                                                                                                           | 5,487       | New-onset elevated blood pressure with proteinuria | Not reported                                                                |
| Zetterstrom K 2005 | Sweden  | Nationwide prospective cohort study, 1992-1998              | Women in the Swedish Medical Birth Register aged between 15-44 years with singleton pregnancies                                                                                                                                                            | Women with diabetes, systemic lupus erythematosus or chronic renal disease                                                                                                                                                                            | 681,515     | New-onset elevated blood pressure with proteinuria | About 0%                                                                    |

ICD International Statistical Classification of Diseases and Related Health Problems; BMI body mass index
