# Supplementary material for: Clinical risk factors for pre-eclampsia determined in early pregnancy: systematic review and meta-analysis of large cohort studies
Source: PubMed Central journal article supplement — BMJ. 2016 Apr 19;353:i1753. doi: 10.1136/bmj.i1753 (PMC4837230; doi:10.1136/bmj.i1753), 2016-04-19

Appendix 4: Funnel plots for included cohort studies examining the relation between prior preeclampsia (panel A), chronic hypertension (panel B), or pre-pregnancy body mass index > 30 kg/m<sup>2</sup> (panel C), and the risk of preeclampsia in the index pregnancy. [posted as supplied by author]

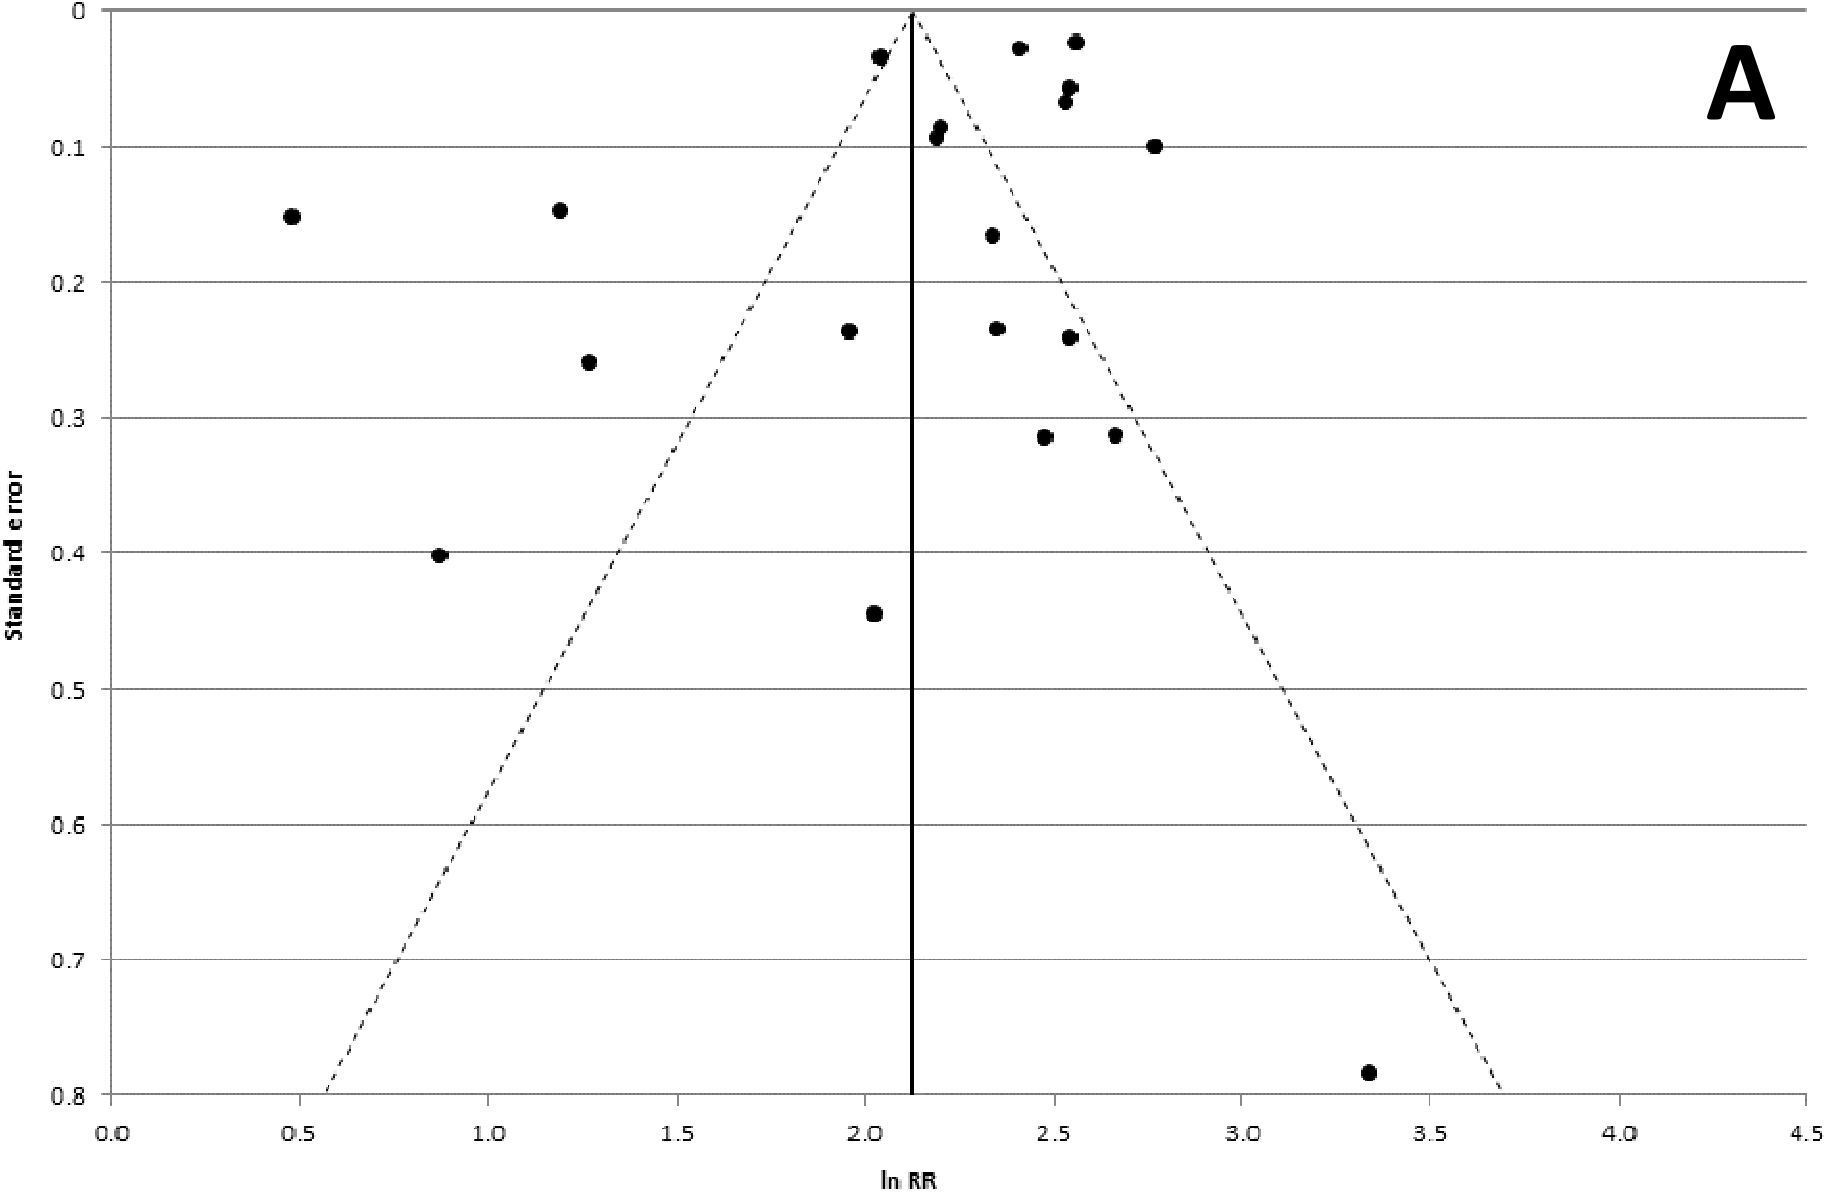

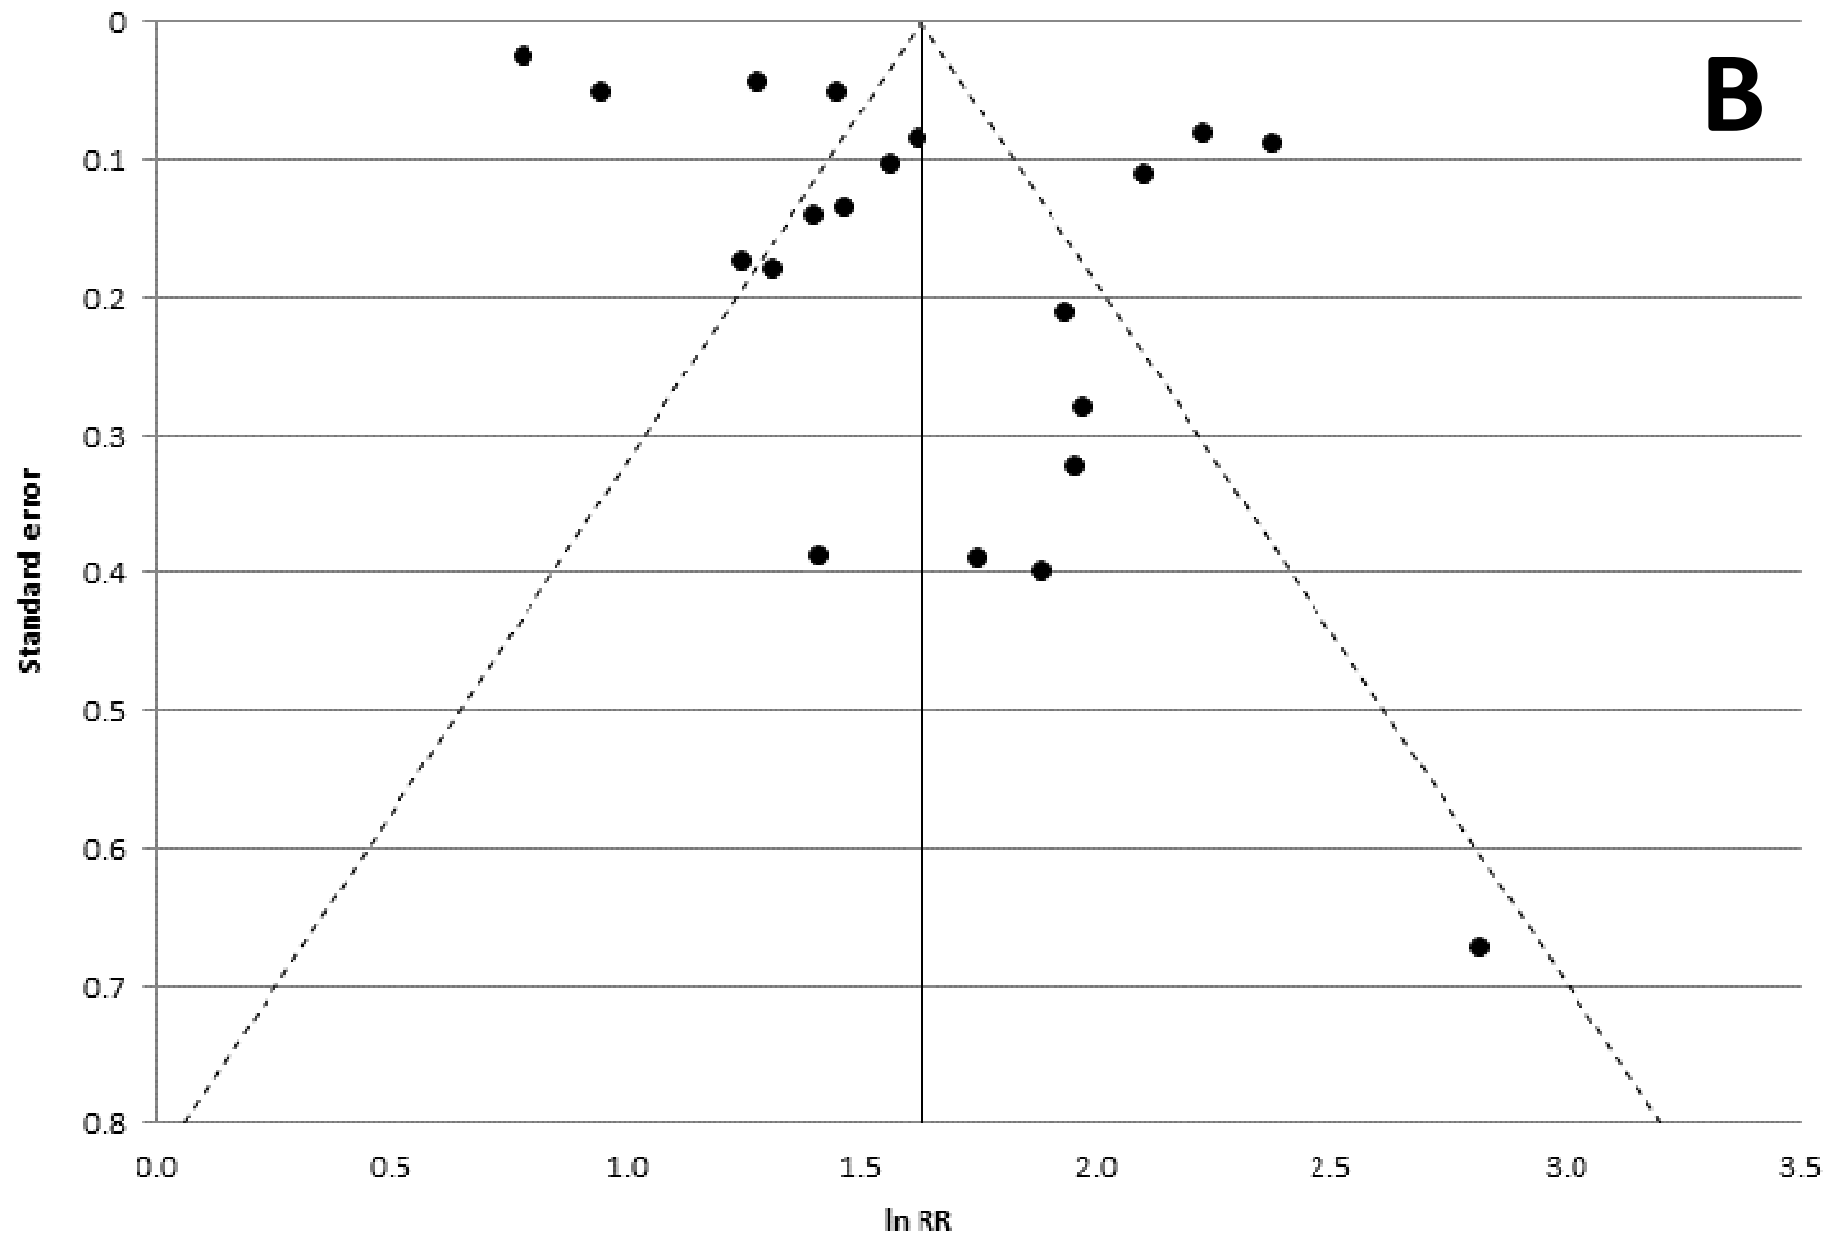

C

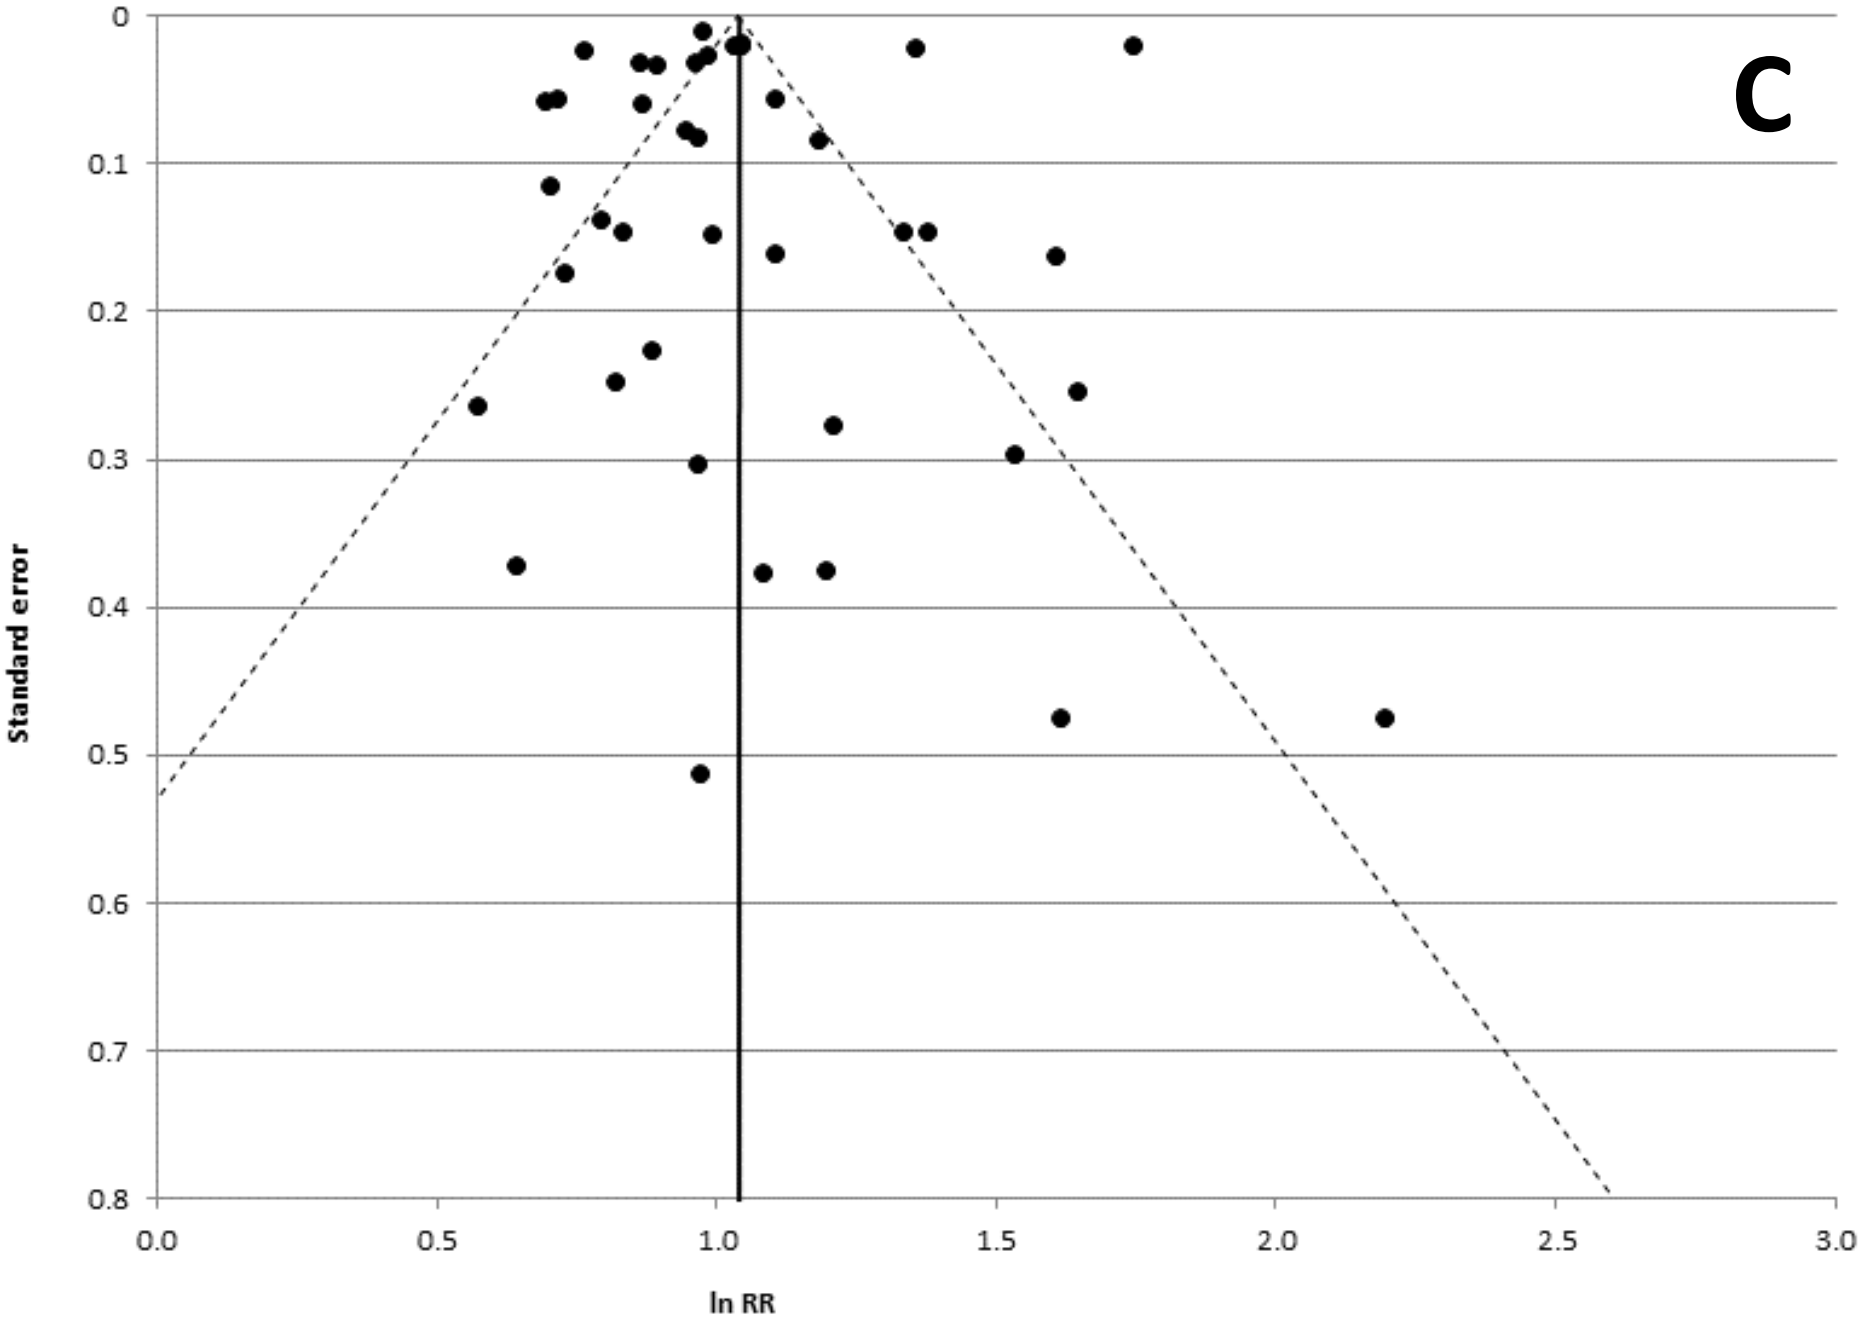

Supplement: bare029374.ww4_default.pdf [file bare029374.ww4_default.pdf]
