# Supplementary material for: Clinical risk factors for pre-eclampsia determined in early pregnancy: systematic review and meta-analysis of large cohort studies
Source: PubMed Central journal article supplement — BMJ. 2016 Apr 19;353:i1753. doi: 10.1136/bmj.i1753 (PMC4837230; doi:10.1136/bmj.i1753), 2016-04-19
Supplement: bare029374.ww5_default.pdf [file bare029374.ww5_default.pdf]

Appendix 5. Pooled preeclampsia event rates among women in the current meta-analysis of large cohort studies (top, ■ light grey bar), in contrast to the preeclampsia event rates in the placebo arm within a published meta-analysis of randomized clinical trials of ASA prophylaxis based on individual patient data<sup>13</sup> (bottom, ■ dark grey bar). Shown are those preeclampsia risk factors available in both of types of meta-analyses. [posted as supplied by author]

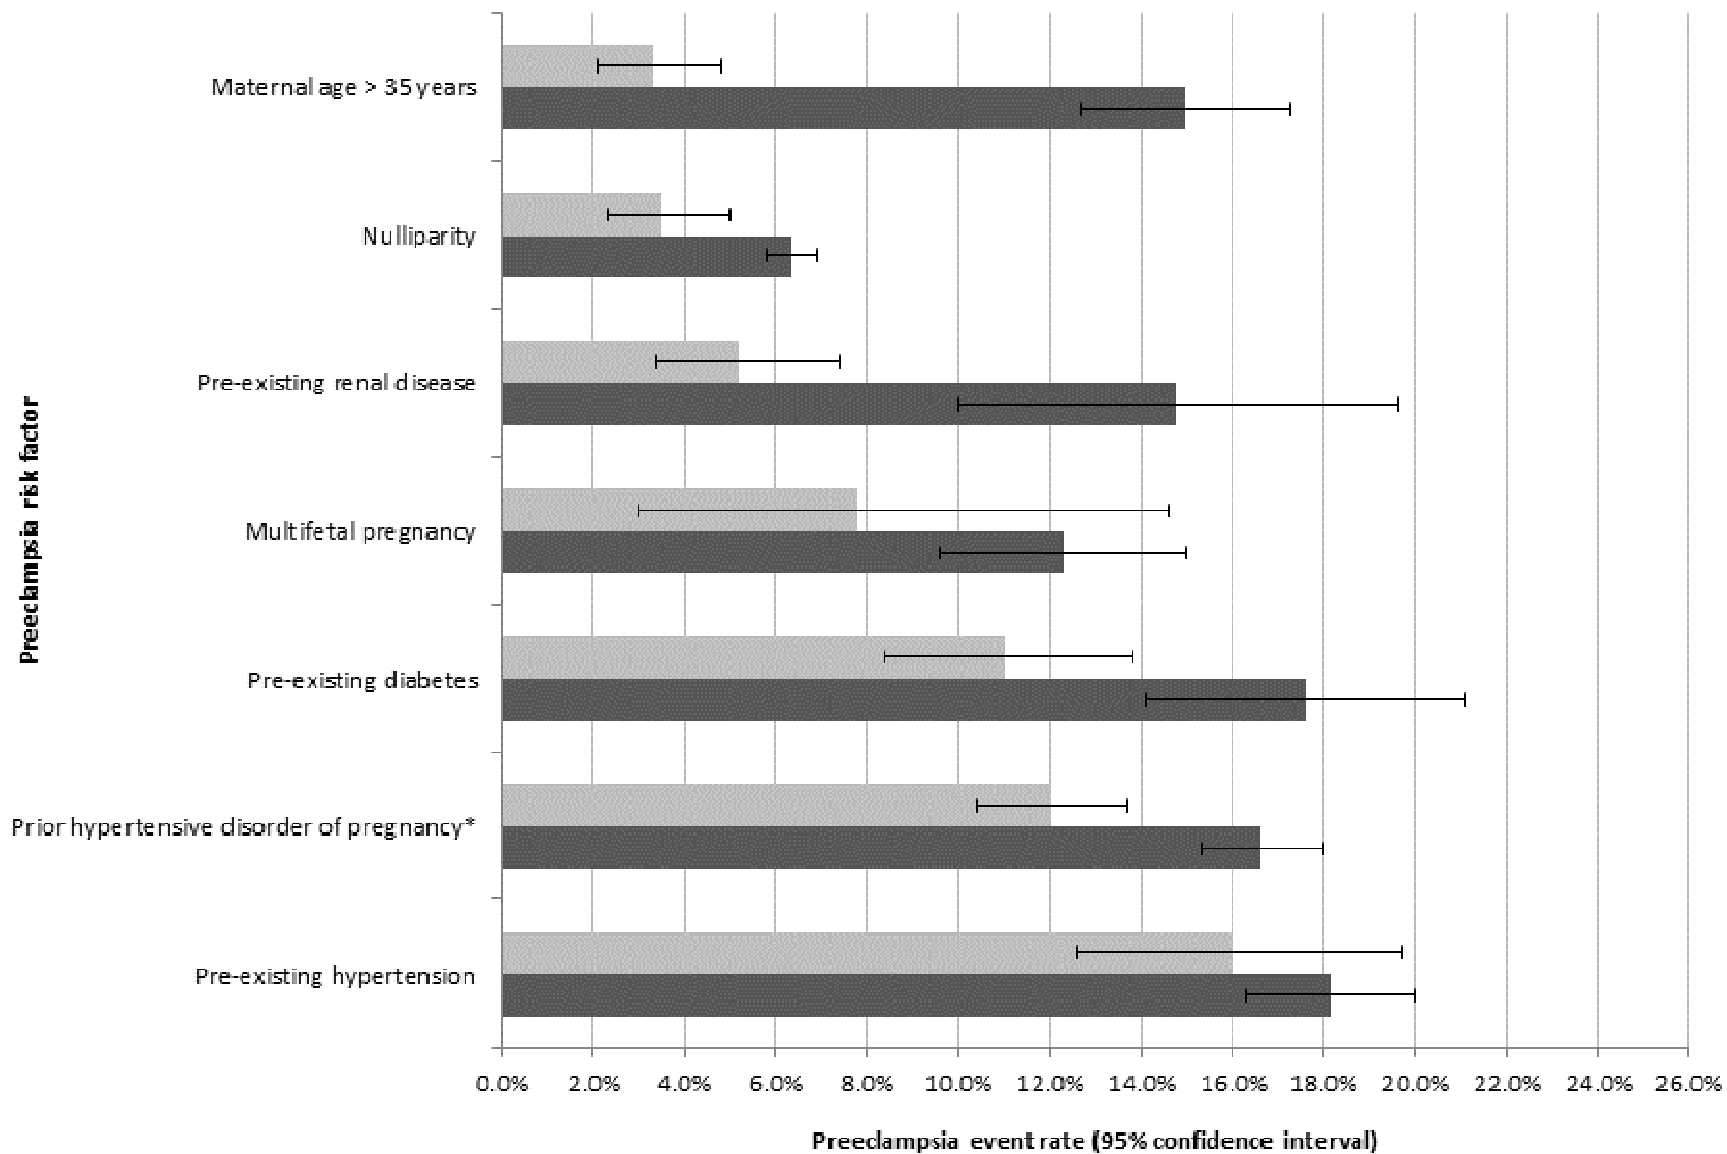

\*The current meta-analysis of large cohort studies only examined prior preeclampsia, while the previously published meta-analysis of randomized clinical trials of ASA prophylaxis considered prior hypertensive disorder of pregnancy (i.e., prior gestational hypertension or preeclampsia).<sup>13</sup>
